# Supplementary material for: RNA editing, RNA modifications, and transcriptional units in Listeria monocytogenes
Source: Research Square preprint supplement (doi:10.21203/rs.3.rs-1530110/v1), 2022-04-21

**Figure S1. Dotter plot comparing the genomes of strains RO15 and EGD-e.** The mapping is performed with LASTZ.

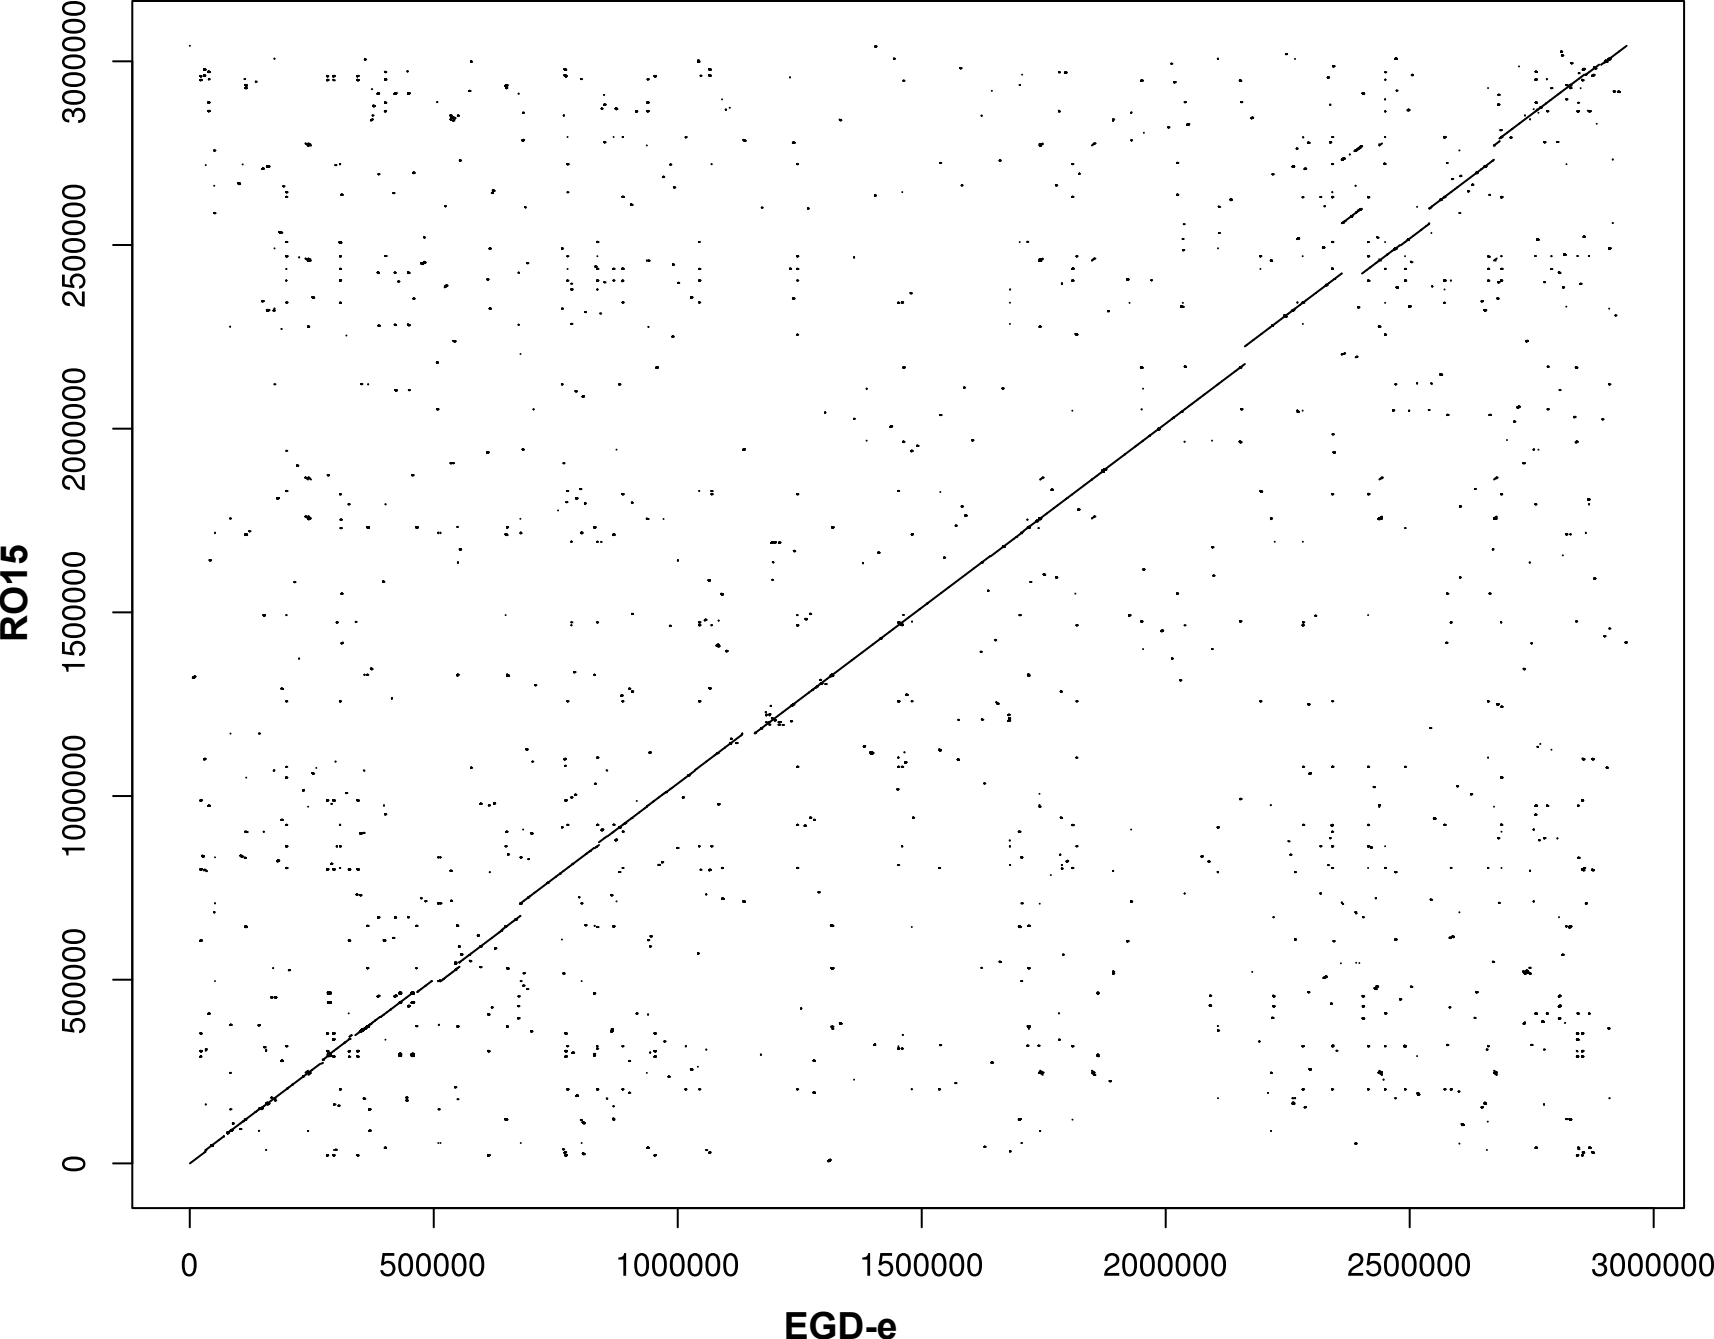

Supplement: Supplementary file 1 [file 1fbf31564e212443a4c7ee3e.pdf]
