# Supplementary material for: RNA editing, RNA modifications, and transcriptional units in Listeria monocytogenes
Source: Research Square preprint supplement (doi:10.21203/rs.3.rs-1530110/v1), 2022-04-21
Supplement: Supplementary file 2 [file 3d71283578bbb6ba6ee7a7f9.xlsx]

## Sheet: R312_modifications_chromosome
Table S9. Position of RNA modifications predicted using direct RNA-seq data in RO15 control at time point 24 h.
Position	RNA_mod_strand	feature	Protein ID	Locus Tag	Product	gene name	DNA_mod_seen	DNA_mod_strand	DNA_mod_type
4338	+	CDS	CAB3278121.1	CPFDLNE_00004	RNA binding protein involved in ribosome maturation	-	No
4477	+	CDS	CAB3278121.1	CPFDLNE_00004	RNA binding protein involved in ribosome maturation	-	No
54767	+	CDS	CAB3278170.1	CPFDLNE_00053	Peptidase propeptide and ypeb domain subfamily	-	No
54914	+	CDS	CAB3278170.1	CPFDLNE_00053	Peptidase propeptide and ypeb domain subfamily	-	No
54942	+	CDS	CAB3278170.1	CPFDLNE_00053	Peptidase propeptide and ypeb domain subfamily	-	Yes	+	modified_base
55040	+	CDS	CAB3278170.1	CPFDLNE_00053	Peptidase propeptide and ypeb domain subfamily	-	No
55063	+	CDS	CAB3278170.1	CPFDLNE_00053	Peptidase propeptide and ypeb domain subfamily	-	Yes	+	modified_base
55082	+	CDS	CAB3278170.1	CPFDLNE_00053	Peptidase propeptide and ypeb domain subfamily	-	No
55105	+	CDS	CAB3278170.1	CPFDLNE_00053	Peptidase propeptide and ypeb domain subfamily	-	No
55139	+	CDS	CAB3278170.1	CPFDLNE_00053	Peptidase propeptide and ypeb domain subfamily	-	No
55199	+	CDS	CAB3278170.1	CPFDLNE_00053	Peptidase propeptide and ypeb domain subfamily	-	No
55214	+	CDS	CAB3278170.1	CPFDLNE_00053	Peptidase propeptide and ypeb domain subfamily	-	No
55563	+	CDS	CAB3278171.1	OCPFDLNE_00054	Regulator	agrB	No
55575	+	CDS	CAB3278171.1	OCPFDLNE_00054	Regulator	agrB	No
55591	+	CDS	CAB3278171.1	OCPFDLNE_00054	Regulator	agrB	No
55607	+	CDS	CAB3278171.1	OCPFDLNE_00054	Regulator	agrB	Yes	-	modified_base
55619	+	CDS	CAB3278171.1	OCPFDLNE_00054	Regulator	agrB	Yes	-	modified_base
55636	+	CDS	CAB3278171.1	OCPFDLNE_00054	Regulator	agrB	Yes	+	modified_base
55657	+	CDS	CAB3278171.1	OCPFDLNE_00054	Regulator	agrB	No
55726	+	CDS	CAB3278171.1	OCPFDLNE_00054	Regulator	agrB	No
55844	+	CDS	CAB3278171.1	OCPFDLNE_00054	Regulator	agrB	No
55902	+	CDS	CAB3278171.1	OCPFDLNE_00054	Regulator	agrB	Yes	+	modified_base
55933	+	CDS	CAB3278171.1	OCPFDLNE_00054	Regulator	agrB	No
55950	+	CDS	CAB3278171.1	OCPFDLNE_00054	Regulator	agrB	No
55961	+	CDS	CAB3278171.1	OCPFDLNE_00054	Regulator	agrB	No
55977	+	CDS	CAB3278171.1	OCPFDLNE_00054	Regulator	agrB	No
56014	+	CDS	CAB3278171.1	OCPFDLNE_00054	Regulator	agrB	No
56068	+	CDS	CAB3278171.1	OCPFDLNE_00054	Regulator	agrB	No
56088	+	CDS	CAB3278171.1	OCPFDLNE_00054	Regulator	agrB	No
56105	+	CDS	CAB3278171.1	OCPFDLNE_00054	Regulator	agrB	Yes	-	modified_base
56207	+	CDS	CAB3278172.1	CPFDLNE_00055	Accessory gene regulator protein D	-	No
56218	+	CDS	CAB3278172.1	CPFDLNE_00055	Accessory gene regulator protein D	-	No
56242	+	CDS	CAB3278172.1	CPFDLNE_00055	Accessory gene regulator protein D	-	Yes	-	modified_base
56273	+	CDS	CAB3278172.1	CPFDLNE_00055	Accessory gene regulator protein D	-	Yes	-	modified_base
56360	+	intergenic region	-	-	-	-	No
56398	+	intergenic region	-	-	-	-	No
56429	+	CDS	CAB3278173.1	OCPFDLNE_00056	Accessory transcriptional regulator protein C	dpiB	Yes	-	modified_base
56485	+	CDS	CAB3278173.1	OCPFDLNE_00056	Accessory transcriptional regulator protein C	dpiB	No
56495	+	CDS	CAB3278173.1	OCPFDLNE_00056	Accessory transcriptional regulator protein C	dpiB	Yes	-	modified_base
56531	+	CDS	CAB3278173.1	OCPFDLNE_00056	Accessory transcriptional regulator protein C	dpiB	Yes	-	modified_base
170965	+	CDS	CAB3278290.1	OCPFDLNE_00174	Glucose uptake protein GlcU	glcU_1	Yes	+	modified_base
171024	+	CDS	CAB3278290.1	OCPFDLNE_00174	Glucose uptake protein GlcU	glcU_1	Yes	+	modified_base
171219	+	CDS	CAB3278290.1	OCPFDLNE_00174	Glucose uptake protein GlcU	glcU_1	Yes	+	modified_base
171312	+	CDS	CAB3278290.1	OCPFDLNE_00174	Glucose uptake protein GlcU	glcU_1	Yes	+	m4C
197555	+	CDS	CAB3278309.1	OCPFDLNE_00193	Protein Veg	veg	Yes	-	modified_base
197574	+	CDS	CAB3278309.1	OCPFDLNE_00193	Protein Veg	veg	No
197591	+	CDS	CAB3278309.1	OCPFDLNE_00193	Protein Veg	veg	Yes	-	modified_base
197610	+	CDS	CAB3278309.1	OCPFDLNE_00193	Protein Veg	veg	No
197632	+	CDS	CAB3278309.1	OCPFDLNE_00193	Protein Veg	veg	Yes	-	modified_base
197657	+	intergenic region	-	-	-	-	No
197665	+	intergenic region	-	-	-	-	No
203819	+	intergenic region	-	-	-	-	No
203878	+	intergenic region	-	-	-	-	No
203917	+	CDS	CAB3278316.1	OCPFDLNE_00200	Septation protein spoVG	spoVG_1	No
203936	+	CDS	CAB3278316.1	OCPFDLNE_00200	Septation protein spoVG	spoVG_1	No
203980	+	CDS	CAB3278316.1	OCPFDLNE_00200	Septation protein spoVG	spoVG_1	No
204073	+	CDS	CAB3278316.1	OCPFDLNE_00200	Septation protein spoVG	spoVG_1	No
204094	+	CDS	CAB3278316.1	OCPFDLNE_00200	Septation protein spoVG	spoVG_1	No
204112	+	CDS	CAB3278316.1	OCPFDLNE_00200	Septation protein spoVG	spoVG_1	No
204150	+	CDS	CAB3278316.1	OCPFDLNE_00200	Septation protein spoVG	spoVG_1	Yes	+	modified_base
204168	+	CDS	CAB3278316.1	OCPFDLNE_00200	Septation protein spoVG	spoVG_1	Yes	+	modified_base
204183	+	CDS	CAB3278316.1	OCPFDLNE_00200	Septation protein spoVG	spoVG_1	Yes	-	modified_base
218425	-	CDS	CAB3278330.1	OCPFDLNE_00214	L-lactate dehydrogenase	ldh_1	No
218457	-	CDS	CAB3278330.1	OCPFDLNE_00214	L-lactate dehydrogenase	ldh_1	No
218581	-	CDS	CAB3278330.1	OCPFDLNE_00214	L-lactate dehydrogenase	ldh_1	Yes	-	modified_base
218592	-	CDS	CAB3278330.1	OCPFDLNE_00214	L-lactate dehydrogenase	ldh_1	Yes	-	modified_base
218739	-	CDS	CAB3278330.1	OCPFDLNE_00214	L-lactate dehydrogenase	ldh_1	Yes	-	modified_base
218911	-	CDS	CAB3278330.1	OCPFDLNE_00214	L-lactate dehydrogenase	ldh_1	No
219015	-	CDS	CAB3278330.1	OCPFDLNE_00214	L-lactate dehydrogenase	ldh_1	Yes	+	modified_base
219170	-	CDS	CAB3278330.1	OCPFDLNE_00214	L-lactate dehydrogenase	ldh_1	No
219509	+	intergenic region	-	-	-	-	No
219570	+	CDS	CAB3278331.1	OCPFDLNE_00215	General stress protein CTC	ctc	Yes	-	modified_base
219595	+	CDS	CAB3278331.1	OCPFDLNE_00215	General stress protein CTC	ctc	No
219718	+	CDS	CAB3278331.1	OCPFDLNE_00215	General stress protein CTC	ctc	No
227415	+	CDS	CAB3278337.1	OCPFDLNE_00221	Cell division protein DivIC	divIC	No
227424	+	CDS	CAB3278337.1	OCPFDLNE_00221	Cell division protein DivIC	divIC	Yes	+	modified_base
227530	+	CDS	CAB3278337.1	OCPFDLNE_00221	Cell division protein DivIC	divIC	No
241360	+	rRNA		OCPFDLNE_00233	16S ribosomal RNA	-	No
241374	+	rRNA		OCPFDLNE_00233	16S ribosomal RNA	-	No
241382	+	rRNA		OCPFDLNE_00233	16S ribosomal RNA	-	No
241407	+	rRNA		OCPFDLNE_00233	16S ribosomal RNA	-	No
241415	+	rRNA		OCPFDLNE_00233	16S ribosomal RNA	-	No
241445	+	rRNA		OCPFDLNE_00233	16S ribosomal RNA	-	No
241480	+	rRNA		OCPFDLNE_00233	16S ribosomal RNA	-	No
241503	+	rRNA		OCPFDLNE_00233	16S ribosomal RNA	-	No
241536	+	rRNA		OCPFDLNE_00233	16S ribosomal RNA	-	No
241579	+	rRNA		OCPFDLNE_00233	16S ribosomal RNA	-	No
241611	+	rRNA		OCPFDLNE_00233	16S ribosomal RNA	-	No
241622	+	rRNA		OCPFDLNE_00233	16S ribosomal RNA	-	No
241654	+	rRNA		OCPFDLNE_00233	16S ribosomal RNA	-	No
241687	+	rRNA		OCPFDLNE_00233	16S ribosomal RNA	-	No
241705	+	rRNA		OCPFDLNE_00233	16S ribosomal RNA	-	No
241720	+	rRNA		OCPFDLNE_00233	16S ribosomal RNA	-	No
241738	+	rRNA		OCPFDLNE_00233	16S ribosomal RNA	-	No
241793	+	rRNA		OCPFDLNE_00233	16S ribosomal RNA	-	Yes	+	m4C
241801	+	rRNA		OCPFDLNE_00233	16S ribosomal RNA	-	No
241872	+	rRNA		OCPFDLNE_00233	16S ribosomal RNA	-	No
241882	+	rRNA		OCPFDLNE_00233	16S ribosomal RNA	-	No
241901	+	rRNA		OCPFDLNE_00233	16S ribosomal RNA	-	Yes	+	modified_base
241936	+	rRNA		OCPFDLNE_00233	16S ribosomal RNA	-	Yes	+	modified_base
241977	+	rRNA		OCPFDLNE_00233	16S ribosomal RNA	-	No
241985	+	rRNA		OCPFDLNE_00233	16S ribosomal RNA	-	Yes	+	modified_base
242028	+	rRNA		OCPFDLNE_00233	16S ribosomal RNA	-	No
242051	+	rRNA		OCPFDLNE_00233	16S ribosomal RNA	-	Yes	-	m4C
242065	+	rRNA		OCPFDLNE_00233	16S ribosomal RNA	-	No
242075	+	rRNA		OCPFDLNE_00233	16S ribosomal RNA	-	Yes	-	modified_base
242094	+	rRNA		OCPFDLNE_00233	16S ribosomal RNA	-	No
242106	+	rRNA		OCPFDLNE_00233	16S ribosomal RNA	-	Yes	+	modified_base
242134	+	rRNA		OCPFDLNE_00233	16S ribosomal RNA	-	Yes	-	m4C
242142	+	rRNA		OCPFDLNE_00233	16S ribosomal RNA	-	Yes	-	modified_base
242158	+	rRNA		OCPFDLNE_00233	16S ribosomal RNA	-	Yes	+	modified_base
242196	+	rRNA		OCPFDLNE_00233	16S ribosomal RNA	-	No
242220	+	rRNA		OCPFDLNE_00233	16S ribosomal RNA	-	No
242239	+	rRNA		OCPFDLNE_00233	16S ribosomal RNA	-	No
242251	+	rRNA		OCPFDLNE_00233	16S ribosomal RNA	-	No
242293	+	rRNA		OCPFDLNE_00233	16S ribosomal RNA	-	Yes	+	modified_base
242312	+	rRNA		OCPFDLNE_00233	16S ribosomal RNA	-	No
242323	+	rRNA		OCPFDLNE_00233	16S ribosomal RNA	-	No
242336	+	rRNA		OCPFDLNE_00233	16S ribosomal RNA	-	No
242359	+	rRNA		OCPFDLNE_00233	16S ribosomal RNA	-	Yes	+	modified_base
242389	+	rRNA		OCPFDLNE_00233	16S ribosomal RNA	-	No
242400	+	rRNA		OCPFDLNE_00233	16S ribosomal RNA	-	No
242448	+	rRNA		OCPFDLNE_00233	16S ribosomal RNA	-	Yes	+	modified_base
242462	+	rRNA		OCPFDLNE_00233	16S ribosomal RNA	-	No
242513	+	rRNA		OCPFDLNE_00233	16S ribosomal RNA	-	No
242549	+	rRNA		OCPFDLNE_00233	16S ribosomal RNA	-	No
242568	+	rRNA		OCPFDLNE_00233	16S ribosomal RNA	-	No
242604	+	rRNA		OCPFDLNE_00233	16S ribosomal RNA	-	Yes	+	modified_base
242675	+	rRNA		OCPFDLNE_00233	16S ribosomal RNA	-	Yes	-	m4C
242683	+	rRNA		OCPFDLNE_00233	16S ribosomal RNA	-	Yes	-	modified_base
242707	+	rRNA		OCPFDLNE_00233	16S ribosomal RNA	-	No
242722	+	rRNA		OCPFDLNE_00233	16S ribosomal RNA	-	No
242753	+	rRNA		OCPFDLNE_00233	16S ribosomal RNA	-	Yes	-	modified_base
242771	+	rRNA		OCPFDLNE_00233	16S ribosomal RNA	-	No
242791	+	rRNA		OCPFDLNE_00233	16S ribosomal RNA	-	No
242805	+	rRNA		OCPFDLNE_00233	16S ribosomal RNA	-	Yes	+	modified_base
243091	+	rRNA		OCPFDLNE_00234	23S ribosomal RNA	-	No
243119	+	rRNA		OCPFDLNE_00234	23S ribosomal RNA	-	No
243133	+	rRNA		OCPFDLNE_00234	23S ribosomal RNA	-	Yes	+	modified_base
243146	+	rRNA		OCPFDLNE_00234	23S ribosomal RNA	-	Yes	+	modified_base
243204	+	rRNA		OCPFDLNE_00234	23S ribosomal RNA	-	No
243237	+	rRNA		OCPFDLNE_00234	23S ribosomal RNA	-	Yes	-	modified_base
243245	+	rRNA		OCPFDLNE_00234	23S ribosomal RNA	-	No
243269	+	rRNA		OCPFDLNE_00234	23S ribosomal RNA	-	No
243323	+	rRNA		OCPFDLNE_00234	23S ribosomal RNA	-	Yes	+	modified_base
243344	+	rRNA		OCPFDLNE_00234	23S ribosomal RNA	-	Yes	-	modified_base
243360	+	rRNA		OCPFDLNE_00234	23S ribosomal RNA	-	Yes	+	modified_base
243394	+	rRNA		OCPFDLNE_00234	23S ribosomal RNA	-	No
243434	+	rRNA		OCPFDLNE_00234	23S ribosomal RNA	-	Yes	+	modified_base
243450	+	rRNA		OCPFDLNE_00234	23S ribosomal RNA	-	Yes	+	modified_base
243501	+	rRNA		OCPFDLNE_00234	23S ribosomal RNA	-	No
243515	+	rRNA		OCPFDLNE_00234	23S ribosomal RNA	-	No
243591	+	rRNA		OCPFDLNE_00234	23S ribosomal RNA	-	No
243644	+	rRNA		OCPFDLNE_00234	23S ribosomal RNA	-	No
243680	+	rRNA		OCPFDLNE_00234	23S ribosomal RNA	-	No
243706	+	rRNA		OCPFDLNE_00234	23S ribosomal RNA	-	Yes	-	m4C
243737	+	rRNA		OCPFDLNE_00234	23S ribosomal RNA	-	Yes	+	m4C
243764	+	rRNA		OCPFDLNE_00234	23S ribosomal RNA	-	No
243795	+	rRNA		OCPFDLNE_00234	23S ribosomal RNA	-	No
243812	+	rRNA		OCPFDLNE_00234	23S ribosomal RNA	-	No
243855	+	rRNA		OCPFDLNE_00234	23S ribosomal RNA	-	No
243870	+	rRNA		OCPFDLNE_00234	23S ribosomal RNA	-	Yes	-	modified_base
243947	+	rRNA		OCPFDLNE_00234	23S ribosomal RNA	-	Yes	-	modified_base
243976	+	rRNA		OCPFDLNE_00234	23S ribosomal RNA	-	No
244017	+	rRNA		OCPFDLNE_00234	23S ribosomal RNA	-	No
244050	+	rRNA		OCPFDLNE_00234	23S ribosomal RNA	-	No
244070	+	rRNA		OCPFDLNE_00234	23S ribosomal RNA	-	No
244097	+	rRNA		OCPFDLNE_00234	23S ribosomal RNA	-	No
244107	+	rRNA		OCPFDLNE_00234	23S ribosomal RNA	-	No
244168	+	rRNA		OCPFDLNE_00234	23S ribosomal RNA	-	No
244177	+	rRNA		OCPFDLNE_00234	23S ribosomal RNA	-	No
244199	+	rRNA		OCPFDLNE_00234	23S ribosomal RNA	-	Yes	+	modified_base
244237	+	rRNA		OCPFDLNE_00234	23S ribosomal RNA	-	No
244273	+	rRNA		OCPFDLNE_00234	23S ribosomal RNA	-	Yes	-	modified_base
244288	+	rRNA		OCPFDLNE_00234	23S ribosomal RNA	-	Yes	+	modified_base
244322	+	rRNA		OCPFDLNE_00234	23S ribosomal RNA	-	No
244332	+	rRNA		OCPFDLNE_00234	23S ribosomal RNA	-	Yes	-	m4C
244345	+	rRNA		OCPFDLNE_00234	23S ribosomal RNA	-	No
244353	+	rRNA		OCPFDLNE_00234	23S ribosomal RNA	-	Yes	+	modified_base
244378	+	rRNA		OCPFDLNE_00234	23S ribosomal RNA	-	Yes	+	m4C
244389	+	rRNA		OCPFDLNE_00234	23S ribosomal RNA	-	Yes	+	modified_base
244473	+	rRNA		OCPFDLNE_00234	23S ribosomal RNA	-	No
244487	+	rRNA		OCPFDLNE_00234	23S ribosomal RNA	-	Yes	+	modified_base
244495	+	rRNA		OCPFDLNE_00234	23S ribosomal RNA	-	Yes	-	modified_base
244513	+	rRNA		OCPFDLNE_00234	23S ribosomal RNA	-	No
244532	+	rRNA		OCPFDLNE_00234	23S ribosomal RNA	-	No
244550	+	rRNA		OCPFDLNE_00234	23S ribosomal RNA	-	No
244577	+	rRNA		OCPFDLNE_00234	23S ribosomal RNA	-	Yes	-	modified_base
244599	+	rRNA		OCPFDLNE_00234	23S ribosomal RNA	-	No
244627	+	rRNA		OCPFDLNE_00234	23S ribosomal RNA	-	No
244636	+	rRNA		OCPFDLNE_00234	23S ribosomal RNA	-	Yes	-	modified_base
244657	+	rRNA		OCPFDLNE_00234	23S ribosomal RNA	-	No
244684	+	rRNA		OCPFDLNE_00234	23S ribosomal RNA	-	No
244699	+	rRNA		OCPFDLNE_00234	23S ribosomal RNA	-	Yes	+	modified_base
244736	+	rRNA		OCPFDLNE_00234	23S ribosomal RNA	-	No
244748	+	rRNA		OCPFDLNE_00234	23S ribosomal RNA	-	No
244758	+	rRNA		OCPFDLNE_00234	23S ribosomal RNA	-	Yes	-	modified_base
244831	+	rRNA		OCPFDLNE_00234	23S ribosomal RNA	-	Yes	+	modified_base
244913	+	rRNA		OCPFDLNE_00234	23S ribosomal RNA	-	Yes	-	modified_base
244926	+	rRNA		OCPFDLNE_00234	23S ribosomal RNA	-	Yes	+	m4C
244955	+	rRNA		OCPFDLNE_00234	23S ribosomal RNA	-	No
244992	+	rRNA		OCPFDLNE_00234	23S ribosomal RNA	-	No
245005	+	rRNA		OCPFDLNE_00234	23S ribosomal RNA	-	No
245015	+	rRNA		OCPFDLNE_00234	23S ribosomal RNA	-	Yes	-	modified_base
245030	+	rRNA		OCPFDLNE_00234	23S ribosomal RNA	-	Yes	+	m4C
245048	+	rRNA		OCPFDLNE_00234	23S ribosomal RNA	-	No
245065	+	rRNA		OCPFDLNE_00234	23S ribosomal RNA	-	No
245076	+	rRNA		OCPFDLNE_00234	23S ribosomal RNA	-	Yes	+	modified_base
245134	+	rRNA		OCPFDLNE_00234	23S ribosomal RNA	-	No
245152	+	rRNA		OCPFDLNE_00234	23S ribosomal RNA	-	No
245181	+	rRNA		OCPFDLNE_00234	23S ribosomal RNA	-	No
245209	+	rRNA		OCPFDLNE_00234	23S ribosomal RNA	-	Yes	-	modified_base
245253	+	rRNA		OCPFDLNE_00234	23S ribosomal RNA	-	No
245266	+	rRNA		OCPFDLNE_00234	23S ribosomal RNA	-	No
245319	+	rRNA		OCPFDLNE_00234	23S ribosomal RNA	-	No
245337	+	rRNA		OCPFDLNE_00234	23S ribosomal RNA	-	No
245347	+	rRNA		OCPFDLNE_00234	23S ribosomal RNA	-	Yes	-	modified_base
245368	+	rRNA		OCPFDLNE_00234	23S ribosomal RNA	-	No
245397	+	rRNA		OCPFDLNE_00234	23S ribosomal RNA	-	No
245470	+	rRNA		OCPFDLNE_00234	23S ribosomal RNA	-	Yes	-	modified_base
245506	+	rRNA		OCPFDLNE_00234	23S ribosomal RNA	-	Yes	-	modified_base
245524	+	rRNA		OCPFDLNE_00234	23S ribosomal RNA	-	Yes	+	modified_base
245533	+	rRNA		OCPFDLNE_00234	23S ribosomal RNA	-	No
245544	+	rRNA		OCPFDLNE_00234	23S ribosomal RNA	-	No
245568	+	rRNA		OCPFDLNE_00234	23S ribosomal RNA	-	Yes	-	modified_base
245578	+	rRNA		OCPFDLNE_00234	23S ribosomal RNA	-	No
245587	+	rRNA		OCPFDLNE_00234	23S ribosomal RNA	-	No
245600	+	rRNA		OCPFDLNE_00234	23S ribosomal RNA	-	No
245632	+	rRNA		OCPFDLNE_00234	23S ribosomal RNA	-	Yes	-	m4C
245666	+	rRNA		OCPFDLNE_00234	23S ribosomal RNA	-	Yes	-	modified_base
245687	+	rRNA		OCPFDLNE_00234	23S ribosomal RNA	-	Yes	-	modified_base
245695	+	rRNA		OCPFDLNE_00234	23S ribosomal RNA	-	No
245731	+	rRNA		OCPFDLNE_00234	23S ribosomal RNA	-	No
245768	+	rRNA		OCPFDLNE_00234	23S ribosomal RNA	-	Yes	+	modified_base
245802	+	rRNA		OCPFDLNE_00234	23S ribosomal RNA	-	No
245843	+	rRNA		OCPFDLNE_00234	23S ribosomal RNA	-	Yes	+	modified_base
245860	+	rRNA		OCPFDLNE_00234	23S ribosomal RNA	-	No
245871	+	rRNA		OCPFDLNE_00234	23S ribosomal RNA	-	No
245895	+	rRNA		OCPFDLNE_00234	23S ribosomal RNA	-	Yes	-	m4C
245904	+	rRNA		OCPFDLNE_00234	23S ribosomal RNA	-	No
245917	+	rRNA		OCPFDLNE_00234	23S ribosomal RNA	-	Yes	+	modified_base
245928	+	rRNA		OCPFDLNE_00234	23S ribosomal RNA	-	Yes	+	modified_base
245939	+	rRNA		OCPFDLNE_00234	23S ribosomal RNA	-	No
245962	+	rRNA		OCPFDLNE_00234	23S ribosomal RNA	-	Yes	+	m4C
245996	+	intergenic region	-	-	-	-	No
247381	+	rRNA		OCPFDLNE_00245	16S ribosomal RNA	-	No
247395	+	rRNA		OCPFDLNE_00245	16S ribosomal RNA	-	No
247403	+	rRNA		OCPFDLNE_00245	16S ribosomal RNA	-	No
247428	+	rRNA		OCPFDLNE_00245	16S ribosomal RNA	-	No
247436	+	rRNA		OCPFDLNE_00245	16S ribosomal RNA	-	No
247466	+	rRNA		OCPFDLNE_00245	16S ribosomal RNA	-	No
247501	+	rRNA		OCPFDLNE_00245	16S ribosomal RNA	-	No
247524	+	rRNA		OCPFDLNE_00245	16S ribosomal RNA	-	No
247557	+	rRNA		OCPFDLNE_00245	16S ribosomal RNA	-	No
247600	+	rRNA		OCPFDLNE_00245	16S ribosomal RNA	-	No
247632	+	rRNA		OCPFDLNE_00245	16S ribosomal RNA	-	No
247643	+	rRNA		OCPFDLNE_00245	16S ribosomal RNA	-	Yes	-	m4C
247676	+	rRNA		OCPFDLNE_00245	16S ribosomal RNA	-	No
247708	+	rRNA		OCPFDLNE_00245	16S ribosomal RNA	-	No
247726	+	rRNA		OCPFDLNE_00245	16S ribosomal RNA	-	No
247741	+	rRNA		OCPFDLNE_00245	16S ribosomal RNA	-	Yes	+	modified_base
247759	+	rRNA		OCPFDLNE_00245	16S ribosomal RNA	-	No
247813	+	rRNA		OCPFDLNE_00245	16S ribosomal RNA	-	No
247821	+	rRNA		OCPFDLNE_00245	16S ribosomal RNA	-	Yes	+	m4C
247893	+	rRNA		OCPFDLNE_00245	16S ribosomal RNA	-	Yes	-	m4C
247903	+	rRNA		OCPFDLNE_00245	16S ribosomal RNA	-	No
247922	+	rRNA		OCPFDLNE_00245	16S ribosomal RNA	-	Yes	+	modified_base
247957	+	rRNA		OCPFDLNE_00245	16S ribosomal RNA	-	Yes	+	modified_base
247989	+	rRNA		OCPFDLNE_00245	16S ribosomal RNA	-	Yes	+	modified_base
247998	+	rRNA		OCPFDLNE_00245	16S ribosomal RNA	-	No
248006	+	rRNA		OCPFDLNE_00245	16S ribosomal RNA	-	Yes	+	modified_base
248049	+	rRNA		OCPFDLNE_00245	16S ribosomal RNA	-	No
248072	+	rRNA		OCPFDLNE_00245	16S ribosomal RNA	-	Yes	-	m4C
248086	+	rRNA		OCPFDLNE_00245	16S ribosomal RNA	-	No
248096	+	rRNA		OCPFDLNE_00245	16S ribosomal RNA	-	Yes	-	modified_base
248115	+	rRNA		OCPFDLNE_00245	16S ribosomal RNA	-	No
248127	+	rRNA		OCPFDLNE_00245	16S ribosomal RNA	-	Yes	+	modified_base
248155	+	rRNA		OCPFDLNE_00245	16S ribosomal RNA	-	Yes	-	m4C
248163	+	rRNA		OCPFDLNE_00245	16S ribosomal RNA	-	Yes	+	modified_base
248179	+	rRNA		OCPFDLNE_00245	16S ribosomal RNA	-	Yes	-	modified_base
248217	+	rRNA		OCPFDLNE_00245	16S ribosomal RNA	-	No
248241	+	rRNA		OCPFDLNE_00245	16S ribosomal RNA	-	No
248260	+	rRNA		OCPFDLNE_00245	16S ribosomal RNA	-	No
248272	+	rRNA		OCPFDLNE_00245	16S ribosomal RNA	-	No
248314	+	rRNA		OCPFDLNE_00245	16S ribosomal RNA	-	Yes	+	modified_base
248333	+	rRNA		OCPFDLNE_00245	16S ribosomal RNA	-	No
248344	+	rRNA		OCPFDLNE_00245	16S ribosomal RNA	-	No
248357	+	rRNA		OCPFDLNE_00245	16S ribosomal RNA	-	No
248380	+	rRNA		OCPFDLNE_00245	16S ribosomal RNA	-	Yes	+	modified_base
248410	+	rRNA		OCPFDLNE_00245	16S ribosomal RNA	-	No
248421	+	rRNA		OCPFDLNE_00245	16S ribosomal RNA	-	No
248483	+	rRNA		OCPFDLNE_00245	16S ribosomal RNA	-	No
248534	+	rRNA		OCPFDLNE_00245	16S ribosomal RNA	-	No
248570	+	rRNA		OCPFDLNE_00245	16S ribosomal RNA	-	No
248589	+	rRNA		OCPFDLNE_00245	16S ribosomal RNA	-	No
248625	+	rRNA		OCPFDLNE_00245	16S ribosomal RNA	-	Yes	+	modified_base
248696	+	rRNA		OCPFDLNE_00245	16S ribosomal RNA	-	Yes	-	m4C
248704	+	rRNA		OCPFDLNE_00245	16S ribosomal RNA	-	Yes	-	modified_base
248728	+	rRNA		OCPFDLNE_00245	16S ribosomal RNA	-	No
248743	+	rRNA		OCPFDLNE_00245	16S ribosomal RNA	-	No
248774	+	rRNA		OCPFDLNE_00245	16S ribosomal RNA	-	Yes	-	modified_base
248792	+	rRNA		OCPFDLNE_00245	16S ribosomal RNA	-	No
248812	+	rRNA		OCPFDLNE_00245	16S ribosomal RNA	-	No
248826	+	rRNA		OCPFDLNE_00245	16S ribosomal RNA	-	Yes	+	modified_base
248844	+	intergenic region	-	-	-	-	Yes	+	modified_base
249112	+	rRNA		OCPFDLNE_00246	23S ribosomal RNA	-	No
249140	+	rRNA		OCPFDLNE_00246	23S ribosomal RNA	-	No
249155	+	rRNA		OCPFDLNE_00246	23S ribosomal RNA	-	Yes	-	modified_base
249167	+	rRNA		OCPFDLNE_00246	23S ribosomal RNA	-	Yes	+	modified_base
249226	+	rRNA		OCPFDLNE_00246	23S ribosomal RNA	-	No
249258	+	rRNA		OCPFDLNE_00246	23S ribosomal RNA	-	Yes	-	modified_base
249266	+	rRNA		OCPFDLNE_00246	23S ribosomal RNA	-	Yes	-	modified_base
249290	+	rRNA		OCPFDLNE_00246	23S ribosomal RNA	-	No
249344	+	rRNA		OCPFDLNE_00246	23S ribosomal RNA	-	Yes	-	modified_base
249365	+	rRNA		OCPFDLNE_00246	23S ribosomal RNA	-	No
249381	+	rRNA		OCPFDLNE_00246	23S ribosomal RNA	-	Yes	+	modified_base
249414	+	rRNA		OCPFDLNE_00246	23S ribosomal RNA	-	No
249455	+	rRNA		OCPFDLNE_00246	23S ribosomal RNA	-	No
249471	+	rRNA		OCPFDLNE_00246	23S ribosomal RNA	-	Yes	+	modified_base
249521	+	rRNA		OCPFDLNE_00246	23S ribosomal RNA	-	Yes	-	modified_base
249538	+	rRNA		OCPFDLNE_00246	23S ribosomal RNA	-	No
249612	+	rRNA		OCPFDLNE_00246	23S ribosomal RNA	-	No
249665	+	rRNA		OCPFDLNE_00246	23S ribosomal RNA	-	No
249701	+	rRNA		OCPFDLNE_00246	23S ribosomal RNA	-	No
249727	+	rRNA		OCPFDLNE_00246	23S ribosomal RNA	-	Yes	-	m4C
249785	+	rRNA		OCPFDLNE_00246	23S ribosomal RNA	-	No
249816	+	rRNA		OCPFDLNE_00246	23S ribosomal RNA	-	No
249833	+	rRNA		OCPFDLNE_00246	23S ribosomal RNA	-	No
249876	+	rRNA		OCPFDLNE_00246	23S ribosomal RNA	-	Yes	+	modified_base
249891	+	rRNA		OCPFDLNE_00246	23S ribosomal RNA	-	Yes	-	modified_base
249968	+	rRNA		OCPFDLNE_00246	23S ribosomal RNA	-	Yes	+	m4C
249997	+	rRNA		OCPFDLNE_00246	23S ribosomal RNA	-	No
250038	+	rRNA		OCPFDLNE_00246	23S ribosomal RNA	-	No
250071	+	rRNA		OCPFDLNE_00246	23S ribosomal RNA	-	No
250091	+	rRNA		OCPFDLNE_00246	23S ribosomal RNA	-	No
250118	+	rRNA		OCPFDLNE_00246	23S ribosomal RNA	-	No
250128	+	rRNA		OCPFDLNE_00246	23S ribosomal RNA	-	No
250189	+	rRNA		OCPFDLNE_00246	23S ribosomal RNA	-	No
250198	+	rRNA		OCPFDLNE_00246	23S ribosomal RNA	-	No
250220	+	rRNA		OCPFDLNE_00246	23S ribosomal RNA	-	Yes	+	modified_base
250258	+	rRNA		OCPFDLNE_00246	23S ribosomal RNA	-	No
250294	+	rRNA		OCPFDLNE_00246	23S ribosomal RNA	-	No
250309	+	rRNA		OCPFDLNE_00246	23S ribosomal RNA	-	Yes	+	modified_base
250326	+	rRNA		OCPFDLNE_00246	23S ribosomal RNA	-	No
250353	+	rRNA		OCPFDLNE_00246	23S ribosomal RNA	-	Yes	-	m4C
250366	+	rRNA		OCPFDLNE_00246	23S ribosomal RNA	-	No
250374	+	rRNA		OCPFDLNE_00246	23S ribosomal RNA	-	Yes	+	modified_base
250399	+	rRNA		OCPFDLNE_00246	23S ribosomal RNA	-	Yes	+	m4C
250412	+	rRNA		OCPFDLNE_00246	23S ribosomal RNA	-	No
250484	+	rRNA		OCPFDLNE_00246	23S ribosomal RNA	-	No
250494	+	rRNA		OCPFDLNE_00246	23S ribosomal RNA	-	Yes	+	modified_base
250508	+	rRNA		OCPFDLNE_00246	23S ribosomal RNA	-	Yes	-	modified_base
250516	+	rRNA		OCPFDLNE_00246	23S ribosomal RNA	-	Yes	-	modified_base
250534	+	rRNA		OCPFDLNE_00246	23S ribosomal RNA	-	No
250553	+	rRNA		OCPFDLNE_00246	23S ribosomal RNA	-	No
250571	+	rRNA		OCPFDLNE_00246	23S ribosomal RNA	-	No
250598	+	rRNA		OCPFDLNE_00246	23S ribosomal RNA	-	Yes	-	modified_base
250620	+	rRNA		OCPFDLNE_00246	23S ribosomal RNA	-	No
250648	+	rRNA		OCPFDLNE_00246	23S ribosomal RNA	-	No
250657	+	rRNA		OCPFDLNE_00246	23S ribosomal RNA	-	Yes	-	modified_base
250678	+	rRNA		OCPFDLNE_00246	23S ribosomal RNA	-	No
250705	+	rRNA		OCPFDLNE_00246	23S ribosomal RNA	-	No
250720	+	rRNA		OCPFDLNE_00246	23S ribosomal RNA	-	Yes	+	modified_base
250757	+	rRNA		OCPFDLNE_00246	23S ribosomal RNA	-	No
250769	+	rRNA		OCPFDLNE_00246	23S ribosomal RNA	-	No
250779	+	rRNA		OCPFDLNE_00246	23S ribosomal RNA	-	No
250852	+	rRNA		OCPFDLNE_00246	23S ribosomal RNA	-	Yes	+	modified_base
250934	+	rRNA		OCPFDLNE_00246	23S ribosomal RNA	-	Yes	-	modified_base
250948	+	rRNA		OCPFDLNE_00246	23S ribosomal RNA	-	Yes	-	m4C
250976	+	rRNA		OCPFDLNE_00246	23S ribosomal RNA	-	No
251008	+	rRNA		OCPFDLNE_00246	23S ribosomal RNA	-	No
251026	+	rRNA		OCPFDLNE_00246	23S ribosomal RNA	-	No
251036	+	rRNA		OCPFDLNE_00246	23S ribosomal RNA	-	Yes	-	modified_base
251069	+	rRNA		OCPFDLNE_00246	23S ribosomal RNA	-	No
251086	+	rRNA		OCPFDLNE_00246	23S ribosomal RNA	-	No
251097	+	rRNA		OCPFDLNE_00246	23S ribosomal RNA	-	Yes	+	modified_base
251152	+	rRNA		OCPFDLNE_00246	23S ribosomal RNA	-	Yes	+	modified_base
251173	+	rRNA		OCPFDLNE_00246	23S ribosomal RNA	-	No
251202	+	rRNA		OCPFDLNE_00246	23S ribosomal RNA	-	No
251230	+	rRNA		OCPFDLNE_00246	23S ribosomal RNA	-	Yes	-	modified_base
251274	+	rRNA		OCPFDLNE_00246	23S ribosomal RNA	-	No
251287	+	rRNA		OCPFDLNE_00246	23S ribosomal RNA	-	No
251340	+	rRNA		OCPFDLNE_00246	23S ribosomal RNA	-	No
251358	+	rRNA		OCPFDLNE_00246	23S ribosomal RNA	-	No
251368	+	rRNA		OCPFDLNE_00246	23S ribosomal RNA	-	No
251389	+	rRNA		OCPFDLNE_00246	23S ribosomal RNA	-	No
251417	+	rRNA		OCPFDLNE_00246	23S ribosomal RNA	-	No
251491	+	rRNA		OCPFDLNE_00246	23S ribosomal RNA	-	Yes	+	m4C
251527	+	rRNA		OCPFDLNE_00246	23S ribosomal RNA	-	No
251545	+	rRNA		OCPFDLNE_00246	23S ribosomal RNA	-	Yes	+	modified_base
251554	+	rRNA		OCPFDLNE_00246	23S ribosomal RNA	-	No
251565	+	rRNA		OCPFDLNE_00246	23S ribosomal RNA	-	No
251589	+	rRNA		OCPFDLNE_00246	23S ribosomal RNA	-	Yes	-	modified_base
251599	+	rRNA		OCPFDLNE_00246	23S ribosomal RNA	-	No
251608	+	rRNA		OCPFDLNE_00246	23S ribosomal RNA	-	No
251621	+	rRNA		OCPFDLNE_00246	23S ribosomal RNA	-	No
251653	+	rRNA		OCPFDLNE_00246	23S ribosomal RNA	-	No
251687	+	rRNA		OCPFDLNE_00246	23S ribosomal RNA	-	Yes	+	modified_base
251708	+	rRNA		OCPFDLNE_00246	23S ribosomal RNA	-	Yes	+	modified_base
251716	+	rRNA		OCPFDLNE_00246	23S ribosomal RNA	-	No
251752	+	rRNA		OCPFDLNE_00246	23S ribosomal RNA	-	No
251789	+	rRNA		OCPFDLNE_00246	23S ribosomal RNA	-	No
251823	+	rRNA		OCPFDLNE_00246	23S ribosomal RNA	-	Yes	-	modified_base
251864	+	rRNA		OCPFDLNE_00246	23S ribosomal RNA	-	Yes	-	m4C
251881	+	rRNA		OCPFDLNE_00246	23S ribosomal RNA	-	Yes	-	modified_base
251892	+	rRNA		OCPFDLNE_00246	23S ribosomal RNA	-	No
251916	+	rRNA		OCPFDLNE_00246	23S ribosomal RNA	-	Yes	-	modified_base
251925	+	rRNA		OCPFDLNE_00246	23S ribosomal RNA	-	No
251938	+	rRNA		OCPFDLNE_00246	23S ribosomal RNA	-	Yes	+	modified_base
251949	+	rRNA		OCPFDLNE_00246	23S ribosomal RNA	-	Yes	+	modified_base
251960	+	rRNA		OCPFDLNE_00246	23S ribosomal RNA	-	No
251983	+	rRNA		OCPFDLNE_00246	23S ribosomal RNA	-	Yes	+	m4C
252017	+	intergenic region	-	-	-	-	No
252153	+	rRNA		OCPFDLNE_00247	5S ribosomal RNA	-	No
252169	+	rRNA		OCPFDLNE_00247	5S ribosomal RNA	-	No
298979	+	CDS	CAB3278388.1	OCPFDLNE_00287	ArgE/DapE family deacylase	dapE	No
299008	+	CDS	CAB3278388.1	OCPFDLNE_00287	ArgE/DapE family deacylase	dapE	No
299017	+	CDS	CAB3278388.1	OCPFDLNE_00287	ArgE/DapE family deacylase	dapE	Yes	+	modified_base
299038	+	CDS	CAB3278388.1	OCPFDLNE_00287	ArgE/DapE family deacylase	dapE	Yes	-	modified_base
299059	+	CDS	CAB3278388.1	OCPFDLNE_00287	ArgE/DapE family deacylase	dapE	No
299077	+	CDS	CAB3278388.1	OCPFDLNE_00287	ArgE/DapE family deacylase	dapE	Yes	+	modified_base
299097	+	CDS	CAB3278388.1	OCPFDLNE_00287	ArgE/DapE family deacylase	dapE	Yes	+	modified_base
299130	+	CDS	CAB3278388.1	OCPFDLNE_00287	ArgE/DapE family deacylase	dapE	No
299139	+	CDS	CAB3278388.1	OCPFDLNE_00287	ArgE/DapE family deacylase	dapE	No
299147	+	CDS	CAB3278388.1	OCPFDLNE_00287	ArgE/DapE family deacylase	dapE	No
299158	+	CDS	CAB3278388.1	OCPFDLNE_00287	ArgE/DapE family deacylase	dapE	Yes	+	modified_base
299272	+	CDS	CAB3278388.1	OCPFDLNE_00287	ArgE/DapE family deacylase	dapE	No
299301	+	CDS	CAB3278388.1	OCPFDLNE_00287	ArgE/DapE family deacylase	dapE	No
299322	+	CDS	CAB3278388.1	OCPFDLNE_00287	ArgE/DapE family deacylase	dapE	Yes	-	m4C
299374	+	CDS	CAB3278388.1	OCPFDLNE_00287	ArgE/DapE family deacylase	dapE	Yes	-	modified_base
299481	+	CDS	CAB3278388.1	OCPFDLNE_00287	ArgE/DapE family deacylase	dapE	No
299579	+	CDS	CAB3278388.1	OCPFDLNE_00287	ArgE/DapE family deacylase	dapE	No
299647	+	CDS	CAB3278388.1	OCPFDLNE_00287	ArgE/DapE family deacylase	dapE	Yes	-	modified_base
299817	+	CDS	CAB3278388.1	OCPFDLNE_00287	ArgE/DapE family deacylase	dapE	No
299863	+	CDS	CAB3278388.1	OCPFDLNE_00287	ArgE/DapE family deacylase	dapE	No
327517	+	CDS	CAB3278414.1	OCPFDLNE_00313	MBL fold metallo-hydrolase	yycJ	Yes	+	modified_base
327538	+	CDS	CAB3278414.1	OCPFDLNE_00313	MBL fold metallo-hydrolase	yycJ	No
327628	+	CDS	CAB3278414.1	OCPFDLNE_00313	MBL fold metallo-hydrolase	yycJ	No
327667	+	CDS	CAB3278414.1	OCPFDLNE_00313	MBL fold metallo-hydrolase	yycJ	No
327717	+	CDS	CAB3278414.1	OCPFDLNE_00313	MBL fold metallo-hydrolase	yycJ	Yes	+	modified_base
327935	+	intergenic region	-	-	-	-	Yes	-	modified_base
327957	+	CDS	CAB3278415.1	OCPFDLNE_00314	Sporulation membrane serine protease	htrB	No
328441	+	CDS	CAB3278415.1	OCPFDLNE_00314	Sporulation membrane serine protease	htrB	No
328456	+	CDS	CAB3278415.1	OCPFDLNE_00314	Sporulation membrane serine protease	htrB	No
328469	+	CDS	CAB3278415.1	OCPFDLNE_00314	Sporulation membrane serine protease	htrB	No
328486	+	CDS	CAB3278415.1	OCPFDLNE_00314	Sporulation membrane serine protease	htrB	No
328500	+	CDS	CAB3278415.1	OCPFDLNE_00314	Sporulation membrane serine protease	htrB	Yes	-	modified_base
328510	+	CDS	CAB3278415.1	OCPFDLNE_00314	Sporulation membrane serine protease	htrB	Yes	+	modified_base
328646	+	CDS	CAB3278415.1	OCPFDLNE_00314	Sporulation membrane serine protease	htrB	No
328749	+	CDS	CAB3278415.1	OCPFDLNE_00314	Sporulation membrane serine protease	htrB	Yes	+	modified_base
328757	+	CDS	CAB3278415.1	OCPFDLNE_00314	Sporulation membrane serine protease	htrB	Yes	+	modified_base
328800	+	CDS	CAB3278415.1	OCPFDLNE_00314	Sporulation membrane serine protease	htrB	Yes	-	modified_base
328890	+	CDS	CAB3278415.1	OCPFDLNE_00314	Sporulation membrane serine protease	htrB	Yes	-	m4C
328932	+	CDS	CAB3278415.1	OCPFDLNE_00314	Sporulation membrane serine protease	htrB	No
328955	+	CDS	CAB3278415.1	OCPFDLNE_00314	Sporulation membrane serine protease	htrB	No
328999	+	CDS	CAB3278415.1	OCPFDLNE_00314	Sporulation membrane serine protease	htrB	No
329050	+	CDS	CAB3278415.1	OCPFDLNE_00314	Sporulation membrane serine protease	htrB	Yes	+	modified_base
329084	+	CDS	CAB3278415.1	OCPFDLNE_00314	Sporulation membrane serine protease	htrB	No
383840	-	CDS	CAB3278465.1	OCPFDLNE_00364	Ribose 5-phosphate isomerase B	rpiB_1	No
383935	-	CDS	CAB3278465.1	OCPFDLNE_00364	Ribose 5-phosphate isomerase B	rpiB_1	Yes	-	modified_base
384613	-	CDS	CAB3278466.1	OCPFDLNE_00365	Triosephosphate isomerase	tpi-2	No
384654	-	CDS	CAB3278466.1	OCPFDLNE_00365	Triosephosphate isomerase	tpi-2	No
386933	-	CDS	CAB3278470.1	CPFDLNE_00369	Putative glycerol transporter	-	No
386944	-	CDS	CAB3278470.1	CPFDLNE_00369	Putative glycerol transporter	-	Yes	-	modified_base
386975	-	CDS	CAB3278470.1	CPFDLNE_00369	Putative glycerol transporter	-	No
387001	-	CDS	CAB3278470.1	CPFDLNE_00369	Putative glycerol transporter	-	No
387035	-	CDS	CAB3278470.1	CPFDLNE_00369	Putative glycerol transporter	-	No
387109	-	CDS	CAB3278470.1	CPFDLNE_00369	Putative glycerol transporter	-	No
422226	+	intergenic region	-	-	-	-	No
422260	+	CDS	CAB3278510.1	CPFDLNE_00409	hypothetical protein	-	No
422311	+	CDS	CAB3278510.1	CPFDLNE_00409	hypothetical protein	-	No
422355	+	CDS	CAB3278510.1	CPFDLNE_00409	hypothetical protein	-	Yes	+	modified_base
422727	+	CDS	CAB3278511.1	CPFDLNE_00410	hypothetical protein	-	No
422781	+	CDS	CAB3278511.1	CPFDLNE_00410	hypothetical protein	-	No
422807	+	CDS	CAB3278511.1	CPFDLNE_00410	hypothetical protein	-	No
422842	+	CDS	CAB3278511.1	CPFDLNE_00410	hypothetical protein	-	No
422898	+	CDS	CAB3278511.1	CPFDLNE_00410	hypothetical protein	-	No
422967	+	CDS	CAB3278511.1	CPFDLNE_00410	hypothetical protein	-	No
423105	+	CDS	CAB3278511.1	CPFDLNE_00410	hypothetical protein	-	No
423133	+	CDS	CAB3278511.1	CPFDLNE_00410	hypothetical protein	-	No
423242	+	CDS	CAB3278511.1	CPFDLNE_00410	hypothetical protein	-	No
423354	+	CDS	CAB3278511.1	CPFDLNE_00410	hypothetical protein	-	No
423384	+	CDS	CAB3278511.1	CPFDLNE_00410	hypothetical protein	-	No
423471	+	CDS	CAB3278511.1	CPFDLNE_00410	hypothetical protein	-	Yes	-	modified_base
423544	+	CDS	CAB3278512.1	CPFDLNE_00411	hypothetical protein	-	No
423622	+	CDS	CAB3278512.1	CPFDLNE_00411	hypothetical protein	-	No
423667	+	CDS	CAB3278512.1	CPFDLNE_00411	hypothetical protein	-	No
423716	+	CDS	CAB3278512.1	CPFDLNE_00411	hypothetical protein	-	No
444782	+	intergenic region	-	-	-	-	Yes	+	modified_base
444800	+	CDS	CAB3278533.1	OCPFDLNE_00432	Peptidoglycan-N-acetylglucosamine deacetylase	pgdA	No
444889	+	CDS	CAB3278533.1	OCPFDLNE_00432	Peptidoglycan-N-acetylglucosamine deacetylase	pgdA	No
444904	+	CDS	CAB3278533.1	OCPFDLNE_00432	Peptidoglycan-N-acetylglucosamine deacetylase	pgdA	No
444922	+	CDS	CAB3278533.1	OCPFDLNE_00432	Peptidoglycan-N-acetylglucosamine deacetylase	pgdA	No
444966	+	CDS	CAB3278533.1	OCPFDLNE_00432	Peptidoglycan-N-acetylglucosamine deacetylase	pgdA	No
445020	+	CDS	CAB3278533.1	OCPFDLNE_00432	Peptidoglycan-N-acetylglucosamine deacetylase	pgdA	No
445053	+	CDS	CAB3278533.1	OCPFDLNE_00432	Peptidoglycan-N-acetylglucosamine deacetylase	pgdA	Yes	-	modified_base
445063	+	CDS	CAB3278533.1	OCPFDLNE_00432	Peptidoglycan-N-acetylglucosamine deacetylase	pgdA	No
445092	+	CDS	CAB3278533.1	OCPFDLNE_00432	Peptidoglycan-N-acetylglucosamine deacetylase	pgdA	No
461462	+	intergenic region	-	-	-	-	No
461508	+	intergenic region	-	-	-	-	No
461516	+	intergenic region	-	-	-	-	No
461633	+	intergenic region	-	-	-	-	No
461683	+	intergenic region	-	-	-	-	Yes	+	modified_base
461700	+	intergenic region	-	-	-	-	Yes	-	modified_base
461712	+	intergenic region	-	-	-	-	No
461749	+	intergenic region	-	-	-	-	Yes	+	modified_base
461778	+	intergenic region	-	-	-	-	No
461791	+	intergenic region	-	-	-	-	Yes	-	m4C
461811	+	intergenic region	-	-	-	-	No
461840	+	intergenic region	-	-	-	-	No
461885	+	CDS	CAB3278551.1	OCPFDLNE_00450	Truncated internalin A	inlA_7	No
461976	+	CDS	CAB3278551.1	OCPFDLNE_00450	Truncated internalin A	inlA_7	No
462053	+	CDS	CAB3278551.1	OCPFDLNE_00450	Truncated internalin A	inlA_7	Yes	+	modified_base
462108	+	CDS	CAB3278551.1	OCPFDLNE_00450	Truncated internalin A	inlA_7	No
462228	+	CDS	CAB3278551.1	OCPFDLNE_00450	Truncated internalin A	inlA_7	No
462257	+	CDS	CAB3278551.1	OCPFDLNE_00450	Truncated internalin A	inlA_7	No
462525	+	CDS	CAB3278551.1	OCPFDLNE_00450	Truncated internalin A	inlA_7	No
462549	+	CDS	CAB3278551.1	OCPFDLNE_00450	Truncated internalin A	inlA_7	No
462584	+	CDS	CAB3278551.1	OCPFDLNE_00450	Truncated internalin A	inlA_7	No
462653	+	CDS	CAB3278551.1	OCPFDLNE_00450	Truncated internalin A	inlA_7	Yes	+	modified_base
462830	+	CDS	CAB3278551.1	OCPFDLNE_00450	Truncated internalin A	inlA_7	No
462914	+	CDS	CAB3278551.1	OCPFDLNE_00450	Truncated internalin A	inlA_7	No
463260	+	CDS	CAB3278551.1	OCPFDLNE_00450	Truncated internalin A	inlA_7	No
463371	+	CDS	CAB3278551.1	OCPFDLNE_00450	Truncated internalin A	inlA_7	No
463606	+	CDS	CAB3278551.1	OCPFDLNE_00450	Truncated internalin A	inlA_7	Yes	+	modified_base
463677	+	CDS	CAB3278551.1	OCPFDLNE_00450	Truncated internalin A	inlA_7	Yes	+	m4C
463719	+	CDS	CAB3278551.1	OCPFDLNE_00450	Truncated internalin A	inlA_7	No
463794	+	CDS	CAB3278551.1	OCPFDLNE_00450	Truncated internalin A	inlA_7	Yes	-	modified_base
463853	+	CDS	CAB3278551.1	OCPFDLNE_00450	Truncated internalin A	inlA_7	Yes	+	modified_base
463864	+	CDS	CAB3278551.1	OCPFDLNE_00450	Truncated internalin A	inlA_7	No
463886	+	CDS	CAB3278551.1	OCPFDLNE_00450	Truncated internalin A	inlA_7	No
496326	+	intergenic region	-	-	-	-	No
496498	+	CDS	CAB3278577.1	CPFDLNE_00476	hypothetical protein	-	No
496639	+	CDS	CAB3278577.1	CPFDLNE_00476	hypothetical protein	-	Yes	-	modified_base
496667	+	CDS	CAB3278577.1	CPFDLNE_00476	hypothetical protein	-	No
496681	+	CDS	CAB3278577.1	CPFDLNE_00476	hypothetical protein	-	Yes	+	modified_base
496712	+	CDS	CAB3278577.1	CPFDLNE_00476	hypothetical protein	-	No
496722	+	CDS	CAB3278577.1	CPFDLNE_00476	hypothetical protein	-	No
496737	+	CDS	CAB3278577.1	CPFDLNE_00476	hypothetical protein	-	No
496753	+	CDS	CAB3278577.1	CPFDLNE_00476	hypothetical protein	-	No
496781	+	CDS	CAB3278577.1	CPFDLNE_00476	hypothetical protein	-	Yes	-	modified_base
496800	+	CDS	CAB3278577.1	CPFDLNE_00476	hypothetical protein	-	Yes	-	modified_base
496829	+	CDS	CAB3278577.1	CPFDLNE_00476	hypothetical protein	-	No
496840	+	CDS	CAB3278577.1	CPFDLNE_00476	hypothetical protein	-	Yes	-	modified_base
496857	+	CDS	CAB3278577.1	CPFDLNE_00476	hypothetical protein	-	No
496865	+	CDS	CAB3278577.1	CPFDLNE_00476	hypothetical protein	-	No
497083	+	CDS	CAB3278577.1	CPFDLNE_00476	hypothetical protein	-	No
497117	+	CDS	CAB3278577.1	CPFDLNE_00476	hypothetical protein	-	No
497149	+	CDS	CAB3278577.1	CPFDLNE_00476	hypothetical protein	-	No
532160	+	CDS	CAB3278615.1	CPFDLNE_00514	Universal stress protein UspA	-	No
532222	+	CDS	CAB3278615.1	CPFDLNE_00514	Universal stress protein UspA	-	Yes	-	modified_base
532248	+	CDS	CAB3278615.1	CPFDLNE_00514	Universal stress protein UspA	-	No
532256	+	CDS	CAB3278615.1	CPFDLNE_00514	Universal stress protein UspA	-	Yes	+	modified_base
532299	+	CDS	CAB3278615.1	CPFDLNE_00514	Universal stress protein UspA	-	No
532342	+	CDS	CAB3278615.1	CPFDLNE_00514	Universal stress protein UspA	-	No
532355	+	CDS	CAB3278615.1	CPFDLNE_00514	Universal stress protein UspA	-	Yes	-	modified_base
532431	+	CDS	CAB3278615.1	CPFDLNE_00514	Universal stress protein UspA	-	No
532471	+	CDS	CAB3278615.1	CPFDLNE_00514	Universal stress protein UspA	-	No
532479	+	CDS	CAB3278615.1	CPFDLNE_00514	Universal stress protein UspA	-	Yes	-	modified_base
532499	+	CDS	CAB3278615.1	CPFDLNE_00514	Universal stress protein UspA	-	Yes	-	m4C
532553	+	CDS	CAB3278615.1	CPFDLNE_00514	Universal stress protein UspA	-	Yes	+	modified_base
572445	-	CDS	CAB3278647.1	OCPFDLNE_00546	Tagatose-bisphosphate aldolase	lacD	No
572614	-	CDS	CAB3278647.1	OCPFDLNE_00546	Tagatose-bisphosphate aldolase	lacD	Yes	-	modified_base
572638	-	CDS	CAB3278647.1	OCPFDLNE_00546	Tagatose-bisphosphate aldolase	lacD	Yes	-	modified_base
572656	-	CDS	CAB3278647.1	OCPFDLNE_00546	Tagatose-bisphosphate aldolase	lacD	No
572763	-	CDS	CAB3278647.1	OCPFDLNE_00546	Tagatose-bisphosphate aldolase	lacD	Yes	-	modified_base
572853	-	CDS	CAB3278647.1	OCPFDLNE_00546	Tagatose-bisphosphate aldolase	lacD	No
572868	-	CDS	CAB3278647.1	OCPFDLNE_00546	Tagatose-bisphosphate aldolase	lacD	No
573077	-	CDS	CAB3278647.1	OCPFDLNE_00546	Tagatose-bisphosphate aldolase	lacD	Yes	-	modified_base
573178	-	CDS	CAB3278647.1	OCPFDLNE_00546	Tagatose-bisphosphate aldolase	lacD	No
573270	-	CDS	CAB3278647.1	OCPFDLNE_00546	Tagatose-bisphosphate aldolase	lacD	No
573292	-	CDS	CAB3278647.1	OCPFDLNE_00546	Tagatose-bisphosphate aldolase	lacD	Yes	-	modified_base
573308	-	CDS	CAB3278647.1	OCPFDLNE_00546	Tagatose-bisphosphate aldolase	lacD	No
573330	-	intergenic region	-	-	-	-	No
573483	+	intergenic region	-	-	-	-	No
573493	+	intergenic region	-	-	-	-	No
573519	+	intergenic region	-	-	-	-	Yes	-	modified_base
573557	+	intergenic region	-	-	-	-	Yes	+	modified_base
573655	+	CDS	CAB3278648.1	OCPFDLNE_00547	Serine-type D-Ala-D-Ala carboxypeptidase	pbpX	No
573669	+	CDS	CAB3278648.1	OCPFDLNE_00547	Serine-type D-Ala-D-Ala carboxypeptidase	pbpX	Yes	-	modified_base
573708	+	CDS	CAB3278648.1	OCPFDLNE_00547	Serine-type D-Ala-D-Ala carboxypeptidase	pbpX	No
573723	+	CDS	CAB3278648.1	OCPFDLNE_00547	Serine-type D-Ala-D-Ala carboxypeptidase	pbpX	Yes	+	m4C
573791	+	CDS	CAB3278648.1	OCPFDLNE_00547	Serine-type D-Ala-D-Ala carboxypeptidase	pbpX	No
573934	+	CDS	CAB3278648.1	OCPFDLNE_00547	Serine-type D-Ala-D-Ala carboxypeptidase	pbpX	No
573979	+	CDS	CAB3278648.1	OCPFDLNE_00547	Serine-type D-Ala-D-Ala carboxypeptidase	pbpX	No
574013	+	CDS	CAB3278648.1	OCPFDLNE_00547	Serine-type D-Ala-D-Ala carboxypeptidase	pbpX	Yes	+	modified_base
574053	+	CDS	CAB3278648.1	OCPFDLNE_00547	Serine-type D-Ala-D-Ala carboxypeptidase	pbpX	No
574083	+	CDS	CAB3278648.1	OCPFDLNE_00547	Serine-type D-Ala-D-Ala carboxypeptidase	pbpX	No
574129	+	CDS	CAB3278648.1	OCPFDLNE_00547	Serine-type D-Ala-D-Ala carboxypeptidase	pbpX	No
574158	+	CDS	CAB3278648.1	OCPFDLNE_00547	Serine-type D-Ala-D-Ala carboxypeptidase	pbpX	No
574227	+	CDS	CAB3278648.1	OCPFDLNE_00547	Serine-type D-Ala-D-Ala carboxypeptidase	pbpX	No
574272	+	CDS	CAB3278648.1	OCPFDLNE_00547	Serine-type D-Ala-D-Ala carboxypeptidase	pbpX	No
574357	+	CDS	CAB3278648.1	OCPFDLNE_00547	Serine-type D-Ala-D-Ala carboxypeptidase	pbpX	Yes	+	modified_base
586165	-	CDS	CAB3278661.1	CPFDLNE_00560	Predicted signal-transduction protein containing cAMP-binding and CBS domains	-	No
586173	-	CDS	CAB3278661.1	CPFDLNE_00560	Predicted signal-transduction protein containing cAMP-binding and CBS domains	-	No
586294	-	CDS	CAB3278661.1	CPFDLNE_00560	Predicted signal-transduction protein containing cAMP-binding and CBS domains	-	No
586302	-	CDS	CAB3278661.1	CPFDLNE_00560	Predicted signal-transduction protein containing cAMP-binding and CBS domains	-	Yes	-	m4C
586412	-	CDS	CAB3278661.1	CPFDLNE_00560	Predicted signal-transduction protein containing cAMP-binding and CBS domains	-	Yes	-	modified_base
586455	-	CDS	CAB3278661.1	CPFDLNE_00560	Predicted signal-transduction protein containing cAMP-binding and CBS domains	-	No
586515	-	CDS	CAB3278661.1	CPFDLNE_00560	Predicted signal-transduction protein containing cAMP-binding and CBS domains	-	No
586532	-	CDS	CAB3278661.1	CPFDLNE_00560	Predicted signal-transduction protein containing cAMP-binding and CBS domains	-	Yes	-	modified_base
586599	-	CDS	CAB3278661.1	CPFDLNE_00560	Predicted signal-transduction protein containing cAMP-binding and CBS domains	-	Yes	-	m4C
586715	-	CDS	CAB3278661.1	CPFDLNE_00560	Predicted signal-transduction protein containing cAMP-binding and CBS domains	-	No
586727	-	intergenic region	-	-	-	-	Yes	+	modified_base
611404	+	intergenic region	-	-	-	-	No
611548	+	CDS	CAB3278687.1	CPFDLNE_00586	Transcriptional coactivator p15 (Pc4)	-	No
611556	+	CDS	CAB3278687.1	CPFDLNE_00586	Transcriptional coactivator p15 (Pc4)	-	Yes	+	modified_base
611590	+	CDS	CAB3278687.1	CPFDLNE_00586	Transcriptional coactivator p15 (Pc4)	-	No
611601	+	CDS	CAB3278687.1	CPFDLNE_00586	Transcriptional coactivator p15 (Pc4)	-	No
614738	-	CDS	CAB3278690.1	OCPFDLNE_00589	Invasion associated secreted endopeptidase	iap_2	No
614789	-	CDS	CAB3278690.1	OCPFDLNE_00589	Invasion associated secreted endopeptidase	iap_2	No
614853	-	CDS	CAB3278690.1	OCPFDLNE_00589	Invasion associated secreted endopeptidase	iap_2	No
614869	-	CDS	CAB3278690.1	OCPFDLNE_00589	Invasion associated secreted endopeptidase	iap_2	Yes	+	modified_base
614918	-	CDS	CAB3278690.1	OCPFDLNE_00589	Invasion associated secreted endopeptidase	iap_2	Yes	-	modified_base
615066	-	intergenic region	-	-	-	-	Yes	+	modified_base
618019	+	CDS	CAB3278692.1	CPFDLNE_00591	UPF0118 membrane protein yubA	-	No
618128	+	CDS	CAB3278692.1	CPFDLNE_00591	UPF0118 membrane protein yubA	-	No
618227	+	CDS	CAB3278692.1	CPFDLNE_00591	UPF0118 membrane protein yubA	-	Yes	+	modified_base
618285	+	CDS	CAB3278692.1	CPFDLNE_00591	UPF0118 membrane protein yubA	-	No
618295	+	CDS	CAB3278692.1	CPFDLNE_00591	UPF0118 membrane protein yubA	-	No
618354	+	CDS	CAB3278692.1	CPFDLNE_00591	UPF0118 membrane protein yubA	-	No
618380	+	CDS	CAB3278692.1	CPFDLNE_00591	UPF0118 membrane protein yubA	-	No
618463	+	CDS	CAB3278692.1	CPFDLNE_00591	UPF0118 membrane protein yubA	-	No
618578	+	CDS	CAB3278692.1	CPFDLNE_00591	UPF0118 membrane protein yubA	-	No
618834	+	CDS	CAB3278692.1	CPFDLNE_00591	UPF0118 membrane protein yubA	-	No
618893	+	CDS	CAB3278692.1	CPFDLNE_00591	UPF0118 membrane protein yubA	-	No
618958	+	CDS	CAB3278692.1	CPFDLNE_00591	UPF0118 membrane protein yubA	-	No
632886	+	CDS	CAB3278704.1	CPFDLNE_00603	HdeD family acid-resistance protein (Fragment)	-	Yes	+	modified_base
633142	+	CDS	CAB3278704.1	CPFDLNE_00603	HdeD family acid-resistance protein (Fragment)	-	No
633175	+	CDS	CAB3278704.1	CPFDLNE_00603	HdeD family acid-resistance protein (Fragment)	-	No
633270	+	CDS	CAB3278704.1	CPFDLNE_00603	HdeD family acid-resistance protein (Fragment)	-	No
633351	+	CDS	CAB3278704.1	CPFDLNE_00603	HdeD family acid-resistance protein (Fragment)	-	No
633380	+	intergenic region	-	-	-	-	No
638687	+	CDS	CAB3278711.1	OCPFDLNE_00610	Protease synthase and sporulation negative regulatory protein PAI 1	paiA_1	No
638780	+	CDS	CAB3278711.1	OCPFDLNE_00610	Protease synthase and sporulation negative regulatory protein PAI 1	paiA_1	No
638892	+	CDS	CAB3278711.1	OCPFDLNE_00610	Protease synthase and sporulation negative regulatory protein PAI 1	paiA_1	No
638918	+	CDS	CAB3278711.1	OCPFDLNE_00610	Protease synthase and sporulation negative regulatory protein PAI 1	paiA_1	Yes	+	modified_base
726693	+	intergenic region	-	-	-	-	No
726722	+	CDS	CAB3278808.1	CPFDLNE_00708	hypothetical protein	-	Yes	+	modified_base
726769	+	CDS	CAB3278808.1	CPFDLNE_00708	hypothetical protein	-	No
726785	+	CDS	CAB3278808.1	CPFDLNE_00708	hypothetical protein	-	No
726828	+	CDS	CAB3278808.1	CPFDLNE_00708	hypothetical protein	-	Yes	+	modified_base
726867	+	CDS	CAB3278808.1	CPFDLNE_00708	hypothetical protein	-	No
726887	+	CDS	CAB3278808.1	CPFDLNE_00708	hypothetical protein	-	Yes	+	modified_base
736498	+	CDS	CAB3278824.1	OCPFDLNE_00724	putative oxidoreductase YghA	yghA	No
736539	+	CDS	CAB3278824.1	OCPFDLNE_00724	putative oxidoreductase YghA	yghA	No
736558	+	CDS	CAB3278824.1	OCPFDLNE_00724	putative oxidoreductase YghA	yghA	Yes	-	modified_base
736576	+	CDS	CAB3278824.1	OCPFDLNE_00724	putative oxidoreductase YghA	yghA	No
736649	+	CDS	CAB3278824.1	OCPFDLNE_00724	putative oxidoreductase YghA	yghA	Yes	+	m4C
736707	+	CDS	CAB3278824.1	OCPFDLNE_00724	putative oxidoreductase YghA	yghA	No
736752	+	CDS	CAB3278824.1	OCPFDLNE_00724	putative oxidoreductase YghA	yghA	No
736794	+	CDS	CAB3278824.1	OCPFDLNE_00724	putative oxidoreductase YghA	yghA	Yes	+	modified_base
786576	+	intergenic region	-	-	-	-	Yes	-	modified_base
786606	+	CDS	CAB3278881.1	CPFDLNE_00781	hypothetical protein	-	No
786641	+	CDS	CAB3278881.1	CPFDLNE_00781	hypothetical protein	-	No
786649	+	CDS	CAB3278881.1	CPFDLNE_00781	hypothetical protein	-	No
786704	+	CDS	CAB3278881.1	CPFDLNE_00781	hypothetical protein	-	Yes	+	modified_base
854508	+	intergenic region	-	-	-	-	No
854527	+	CDS	CAB3278950.1	CPFDLNE_00850	MarR family transcriptional regulator	-	Yes	-	modified_base
854642	+	CDS	CAB3278950.1	CPFDLNE_00850	MarR family transcriptional regulator	-	No
857812	+	CDS	CAB3278953.1	CPFDLNE_00853	hypothetical protein	-	No
857905	+	CDS	CAB3278953.1	CPFDLNE_00853	hypothetical protein	-	Yes	+	modified_base
857970	+	CDS	CAB3278953.1	CPFDLNE_00853	hypothetical protein	-	No
924356	+	CDS	CAB3279005.1	CPFDLNE_00905	hypothetical protein	-	No
924376	+	CDS	CAB3279005.1	CPFDLNE_00905	hypothetical protein	-	No
924391	+	CDS	CAB3279005.1	CPFDLNE_00905	hypothetical protein	-	No
924399	+	CDS	CAB3279005.1	CPFDLNE_00905	hypothetical protein	-	No
924477	+	CDS	CAB3279005.1	CPFDLNE_00905	hypothetical protein	-	No
924547	+	intergenic region	-	-	-	-	No
924558	+	intergenic region	-	-	-	-	No
960552	+	CDS	CAB3279042.1	OCPFDLNE_00942	EndoA inhibitor	ndoAI	No
960752	+	CDS	CAB3279042.1	OCPFDLNE_00942	EndoA inhibitor	ndoAI	No
960803	+	CDS	CAB3279042.1	OCPFDLNE_00942	EndoA inhibitor	ndoAI	Yes	-	modified_base
960813	+	intergenic region	-	-	-	-	No
960884	+	CDS	CAB3279043.1	OCPFDLNE_00943	mRNA interferase	ndoA	Yes	-	modified_base
975885	+	CDS	CAB3279061.1	CPFDLNE_00965	Laac	-	No
982146	+	intergenic region	-	-	-	-	No
982164	+	intergenic region	-	-	-	-	No
982312	+	CDS	CAB3279068.1	CPFDLNE_00972	Transcription activator	-	No
982385	+	CDS	CAB3279068.1	CPFDLNE_00972	Transcription activator	-	No
983793	+	intergenic region	-	-	-	-	No
983813	+	intergenic region	-	-	-	-	No
983850	+	CDS	CAB3279070.1	CPFDLNE_00974	NAD-dependent succinate-semialdehyde dehydrogenase	-	No
983887	+	CDS	CAB3279070.1	CPFDLNE_00974	NAD-dependent succinate-semialdehyde dehydrogenase	-	Yes	+	modified_base
983913	+	CDS	CAB3279070.1	CPFDLNE_00974	NAD-dependent succinate-semialdehyde dehydrogenase	-	Yes	-	modified_base
983922	+	CDS	CAB3279070.1	CPFDLNE_00974	NAD-dependent succinate-semialdehyde dehydrogenase	-	No
983939	+	CDS	CAB3279070.1	CPFDLNE_00974	NAD-dependent succinate-semialdehyde dehydrogenase	-	No
984037	+	CDS	CAB3279070.1	CPFDLNE_00974	NAD-dependent succinate-semialdehyde dehydrogenase	-	Yes	-	modified_base
984082	+	CDS	CAB3279070.1	CPFDLNE_00974	NAD-dependent succinate-semialdehyde dehydrogenase	-	No
984187	+	CDS	CAB3279070.1	CPFDLNE_00974	NAD-dependent succinate-semialdehyde dehydrogenase	-	Yes	+	m4C
984213	+	CDS	CAB3279070.1	CPFDLNE_00974	NAD-dependent succinate-semialdehyde dehydrogenase	-	No
984380	+	CDS	CAB3279070.1	CPFDLNE_00974	NAD-dependent succinate-semialdehyde dehydrogenase	-	No
984407	+	CDS	CAB3279070.1	CPFDLNE_00974	NAD-dependent succinate-semialdehyde dehydrogenase	-	Yes	-	modified_base
984417	+	CDS	CAB3279070.1	CPFDLNE_00974	NAD-dependent succinate-semialdehyde dehydrogenase	-	Yes	-	modified_base
984430	+	CDS	CAB3279070.1	CPFDLNE_00974	NAD-dependent succinate-semialdehyde dehydrogenase	-	Yes	-	modified_base
984496	+	CDS	CAB3279070.1	CPFDLNE_00974	NAD-dependent succinate-semialdehyde dehydrogenase	-	No
984531	+	CDS	CAB3279070.1	CPFDLNE_00974	NAD-dependent succinate-semialdehyde dehydrogenase	-	No
984564	+	CDS	CAB3279070.1	CPFDLNE_00974	NAD-dependent succinate-semialdehyde dehydrogenase	-	Yes	-	m4C
984623	+	CDS	CAB3279070.1	CPFDLNE_00974	NAD-dependent succinate-semialdehyde dehydrogenase	-	Yes	+	modified_base
984638	+	CDS	CAB3279070.1	CPFDLNE_00974	NAD-dependent succinate-semialdehyde dehydrogenase	-	No
984718	+	CDS	CAB3279070.1	CPFDLNE_00974	NAD-dependent succinate-semialdehyde dehydrogenase	-	Yes	-	modified_base
984794	+	CDS	CAB3279070.1	CPFDLNE_00974	NAD-dependent succinate-semialdehyde dehydrogenase	-	No
984868	+	CDS	CAB3279070.1	CPFDLNE_00974	NAD-dependent succinate-semialdehyde dehydrogenase	-	No
985004	+	CDS	CAB3279070.1	CPFDLNE_00974	NAD-dependent succinate-semialdehyde dehydrogenase	-	No
1008549	-	intergenic region	-	-	-	-	No
1008576	-	intergenic region	-	-	-	-	Yes	+	modified_base
1008597	-	CDS	CAB3279093.1	CPFDLNE_00998	Lmo0937 family membrane protein (Fragment)	-	No
1008635	-	CDS	CAB3279093.1	CPFDLNE_00998	Lmo0937 family membrane protein (Fragment)	-	Yes	-	modified_base
1008728	-	CDS	CAB3279093.1	CPFDLNE_00998	Lmo0937 family membrane protein (Fragment)	-	No
1008757	-	intergenic region	-	-	-	-	No
1013147	+	CDS	CAB3279098.1	OCPFDLNE_01003	DNA protection during starvation protein 2	dps	No
1013201	+	CDS	CAB3279098.1	OCPFDLNE_01003	DNA protection during starvation protein 2	dps	No
1013218	+	CDS	CAB3279098.1	OCPFDLNE_01003	DNA protection during starvation protein 2	dps	No
1013231	+	CDS	CAB3279098.1	OCPFDLNE_01003	DNA protection during starvation protein 2	dps	Yes	+	modified_base
1013265	+	CDS	CAB3279098.1	OCPFDLNE_01003	DNA protection during starvation protein 2	dps	No
1013304	+	CDS	CAB3279098.1	OCPFDLNE_01003	DNA protection during starvation protein 2	dps	Yes	+	modified_base
1013335	+	CDS	CAB3279098.1	OCPFDLNE_01003	DNA protection during starvation protein 2	dps	Yes	+	modified_base
1013361	+	CDS	CAB3279098.1	OCPFDLNE_01003	DNA protection during starvation protein 2	dps	No
1013382	+	CDS	CAB3279098.1	OCPFDLNE_01003	DNA protection during starvation protein 2	dps	Yes	+	modified_base
1013491	+	CDS	CAB3279098.1	OCPFDLNE_01003	DNA protection during starvation protein 2	dps	No
1013534	+	CDS	CAB3279098.1	OCPFDLNE_01003	DNA protection during starvation protein 2	dps	No
1013563	+	CDS	CAB3279098.1	OCPFDLNE_01003	DNA protection during starvation protein 2	dps	No
1013582	+	CDS	CAB3279098.1	OCPFDLNE_01003	DNA protection during starvation protein 2	dps	Yes	-	modified_base
1013606	+	intergenic region	-	-	-	-	No
1013885	+	CDS	CAB3279099.1	CPFDLNE_01004	Iron-sulphur cluster biosynthesis	-	Yes	-	modified_base
1014006	+	CDS	CAB3279099.1	CPFDLNE_01004	Iron-sulphur cluster biosynthesis	-	Yes	+	modified_base
1014034	+	CDS	CAB3279099.1	CPFDLNE_01004	Iron-sulphur cluster biosynthesis	-	Yes	-	modified_base
1014058	+	CDS	CAB3279099.1	CPFDLNE_01004	Iron-sulphur cluster biosynthesis	-	No
1014099	+	CDS	CAB3279099.1	CPFDLNE_01004	Iron-sulphur cluster biosynthesis	-	No
1021227	+	intergenic region	-	-	-	-	No
1021237	+	CDS	CAB3279108.1	CPFDLNE_01013	hypothetical protein	-	Yes	+	modified_base
1021286	+	CDS	CAB3279108.1	CPFDLNE_01013	hypothetical protein	-	No
1021347	+	CDS	CAB3279108.1	CPFDLNE_01013	hypothetical protein	-	Yes	+	modified_base
1021406	+	CDS	CAB3279108.1	CPFDLNE_01013	hypothetical protein	-	Yes	-	modified_base
1021418	+	CDS	CAB3279108.1	CPFDLNE_01013	hypothetical protein	-	No
1021455	+	CDS	CAB3279108.1	CPFDLNE_01013	hypothetical protein	-	Yes	+	modified_base
1021582	+	intergenic region	-	-	-	-	Yes	+	modified_base
1021626	+	intergenic region	-	-	-	-	No
1021637	+	intergenic region	-	-	-	-	No
1021679	+	intergenic region	-	-	-	-	No
1021698	+	CDS	CAB3279109.1	CPFDLNE_01014	hypothetical protein	-	Yes	+	modified_base
1021743	+	CDS	CAB3279109.1	CPFDLNE_01014	hypothetical protein	-	No
1021785	+	CDS	CAB3279109.1	CPFDLNE_01014	hypothetical protein	-	No
1021825	+	CDS	CAB3279109.1	CPFDLNE_01014	hypothetical protein	-	Yes	+	modified_base
1021841	+	CDS	CAB3279109.1	CPFDLNE_01014	hypothetical protein	-	No
1021858	+	CDS	CAB3279109.1	CPFDLNE_01014	hypothetical protein	-	Yes	+	modified_base
1021979	+	CDS	CAB3279109.1	CPFDLNE_01014	hypothetical protein	-	No
1022014	+	intergenic region	-	-	-	-	Yes	+	modified_base
1022092	+	CDS	CAB3279110.1	OCPFDLNE_01015	Protein LiaH	liaH	No
1022101	+	CDS	CAB3279110.1	OCPFDLNE_01015	Protein LiaH	liaH	Yes	-	modified_base
1022116	+	CDS	CAB3279110.1	OCPFDLNE_01015	Protein LiaH	liaH	Yes	+	modified_base
1022129	+	CDS	CAB3279110.1	OCPFDLNE_01015	Protein LiaH	liaH	No
1022162	+	CDS	CAB3279110.1	OCPFDLNE_01015	Protein LiaH	liaH	Yes	+	modified_base
1022266	+	CDS	CAB3279110.1	OCPFDLNE_01015	Protein LiaH	liaH	Yes	-	modified_base
1022284	+	CDS	CAB3279110.1	OCPFDLNE_01015	Protein LiaH	liaH	No
1022302	+	CDS	CAB3279110.1	OCPFDLNE_01015	Protein LiaH	liaH	Yes	+	modified_base
1022332	+	CDS	CAB3279110.1	OCPFDLNE_01015	Protein LiaH	liaH	No
1022379	+	CDS	CAB3279110.1	OCPFDLNE_01015	Protein LiaH	liaH	No
1022466	+	CDS	CAB3279110.1	OCPFDLNE_01015	Protein LiaH	liaH	Yes	-	modified_base
1022499	+	CDS	CAB3279110.1	OCPFDLNE_01015	Protein LiaH	liaH	No
1022517	+	CDS	CAB3279110.1	OCPFDLNE_01015	Protein LiaH	liaH	Yes	+	modified_base
1022531	+	CDS	CAB3279110.1	OCPFDLNE_01015	Protein LiaH	liaH	No
1022575	+	CDS	CAB3279110.1	OCPFDLNE_01015	Protein LiaH	liaH	No
1022585	+	CDS	CAB3279110.1	OCPFDLNE_01015	Protein LiaH	liaH	Yes	+	modified_base
1022612	+	CDS	CAB3279110.1	OCPFDLNE_01015	Protein LiaH	liaH	Yes	-	modified_base
1022624	+	CDS	CAB3279110.1	OCPFDLNE_01015	Protein LiaH	liaH	No
1022632	+	CDS	CAB3279110.1	OCPFDLNE_01015	Protein LiaH	liaH	Yes	+	modified_base
1022650	+	CDS	CAB3279110.1	OCPFDLNE_01015	Protein LiaH	liaH	No
1022675	+	CDS	CAB3279110.1	OCPFDLNE_01015	Protein LiaH	liaH	Yes	+	m4C
1022701	+	CDS	CAB3279110.1	OCPFDLNE_01015	Protein LiaH	liaH	No
1022742	+	CDS	CAB3279110.1	OCPFDLNE_01015	Protein LiaH	liaH	No
1022755	+	CDS	CAB3279110.1	OCPFDLNE_01015	Protein LiaH	liaH	Yes	+	modified_base
1022784	+	CDS	CAB3279110.1	OCPFDLNE_01015	Protein LiaH	liaH	No
1031144	-	CDS	CAB3279119.1	CPFDLNE_01024	Predicted dithiol-disulfide isomerase	-	No
1031166	-	CDS	CAB3279119.1	CPFDLNE_01024	Predicted dithiol-disulfide isomerase	-	No
1031193	-	CDS	CAB3279119.1	CPFDLNE_01024	Predicted dithiol-disulfide isomerase	-	No
1031228	-	CDS	CAB3279119.1	CPFDLNE_01024	Predicted dithiol-disulfide isomerase	-	No
1031242	-	CDS	CAB3279119.1	CPFDLNE_01024	Predicted dithiol-disulfide isomerase	-	No
1031280	-	CDS	CAB3279119.1	CPFDLNE_01024	Predicted dithiol-disulfide isomerase	-	No
1031318	-	CDS	CAB3279119.1	CPFDLNE_01024	Predicted dithiol-disulfide isomerase	-	No
1031434	-	CDS	CAB3279119.1	CPFDLNE_01024	Predicted dithiol-disulfide isomerase	-	No
1031449	-	CDS	CAB3279119.1	CPFDLNE_01024	Predicted dithiol-disulfide isomerase	-	Yes	-	modified_base
1031527	-	intergenic region	-	-	-	-	No
1031551	-	intergenic region	-	-	-	-	No
1040598	-	CDS	CAB3279130.1	CPFDLNE_01035	Teichoic acid D-Ala incorporation-associated protein DltX	-	Yes	-	modified_base
1040724	-	intergenic region	-	-	-	-	No
1058800	-	CDS	CAB3279150.1	CPFDLNE_01055	hypothetical protein	-	No
1059001	-	CDS	CAB3279150.1	CPFDLNE_01055	hypothetical protein	-	No
1066479	-	CDS	CAB3279157.1	CPFDLNE_01062	hypothetical protein	-	Yes	-	modified_base
1066514	-	CDS	CAB3279157.1	CPFDLNE_01062	hypothetical protein	-	No
1066555	-	CDS	CAB3279157.1	CPFDLNE_01062	hypothetical protein	-	No
1067009	+	CDS	CAB3279158.1	OCPFDLNE_01063	PTS HPr component phosphorylation site	ptsH	No
1067124	+	CDS	CAB3279158.1	OCPFDLNE_01063	PTS HPr component phosphorylation site	ptsH	No
1067272	+	CDS	CAB3279159.1	OCPFDLNE_01064	Phosphoenolpyruvate--protein phosphotransferase	ptsI	No
1067613	+	CDS	CAB3279159.1	OCPFDLNE_01064	Phosphoenolpyruvate--protein phosphotransferase	ptsI	No
1067711	+	CDS	CAB3279159.1	OCPFDLNE_01064	Phosphoenolpyruvate--protein phosphotransferase	ptsI	No
1120111	+	CDS	CAB3279215.1	OCPFDLNE_01120	L-lactate dehydrogenase	ldh_2	No
1120181	+	CDS	CAB3279215.1	OCPFDLNE_01120	L-lactate dehydrogenase	ldh_2	No
1120190	+	CDS	CAB3279215.1	OCPFDLNE_01120	L-lactate dehydrogenase	ldh_2	Yes	+	m4C
1120206	+	CDS	CAB3279215.1	OCPFDLNE_01120	L-lactate dehydrogenase	ldh_2	No
1120300	+	CDS	CAB3279215.1	OCPFDLNE_01120	L-lactate dehydrogenase	ldh_2	Yes	-	modified_base
1120400	+	CDS	CAB3279215.1	OCPFDLNE_01120	L-lactate dehydrogenase	ldh_2	Yes	+	modified_base
1120560	+	CDS	CAB3279215.1	OCPFDLNE_01120	L-lactate dehydrogenase	ldh_2	Yes	-	modified_base
1120585	+	CDS	CAB3279215.1	OCPFDLNE_01120	L-lactate dehydrogenase	ldh_2	Yes	-	modified_base
1120651	+	CDS	CAB3279215.1	OCPFDLNE_01120	L-lactate dehydrogenase	ldh_2	Yes	-	m4C
1120660	+	CDS	CAB3279215.1	OCPFDLNE_01120	L-lactate dehydrogenase	ldh_2	No
1120791	+	CDS	CAB3279215.1	OCPFDLNE_01120	L-lactate dehydrogenase	ldh_2	No
1120805	+	CDS	CAB3279215.1	OCPFDLNE_01120	L-lactate dehydrogenase	ldh_2	No
1120832	+	CDS	CAB3279215.1	OCPFDLNE_01120	L-lactate dehydrogenase	ldh_2	Yes	+	modified_base
1120840	+	CDS	CAB3279215.1	OCPFDLNE_01120	L-lactate dehydrogenase	ldh_2	No
1120858	+	CDS	CAB3279215.1	OCPFDLNE_01120	L-lactate dehydrogenase	ldh_2	Yes	+	modified_base
1120878	+	CDS	CAB3279215.1	OCPFDLNE_01120	L-lactate dehydrogenase	ldh_2	Yes	+	modified_base
1120910	+	CDS	CAB3279215.1	OCPFDLNE_01120	L-lactate dehydrogenase	ldh_2	No
1120939	+	CDS	CAB3279215.1	OCPFDLNE_01120	L-lactate dehydrogenase	ldh_2	Yes	+	modified_base
1131146	+	intergenic region	-	-	-	-	No
1131177	+	intergenic region	-	-	-	-	No
1131202	+	CDS	CAB3279226.1	CPFDLNE_01131	hypothetical protein	-	No
1131270	+	CDS	CAB3279226.1	CPFDLNE_01131	hypothetical protein	-	No
1131285	+	CDS	CAB3279226.1	CPFDLNE_01131	hypothetical protein	-	No
1131298	+	CDS	CAB3279226.1	CPFDLNE_01131	hypothetical protein	-	No
1131313	+	CDS	CAB3279226.1	CPFDLNE_01131	hypothetical protein	-	No
1131378	+	CDS	CAB3279226.1	CPFDLNE_01131	hypothetical protein	-	No
1131436	+	CDS	CAB3279226.1	CPFDLNE_01131	hypothetical protein	-	No
1131472	+	CDS	CAB3279226.1	CPFDLNE_01131	hypothetical protein	-	Yes	-	modified_base
1131490	+	CDS	CAB3279226.1	CPFDLNE_01131	hypothetical protein	-	No
1131523	+	CDS	CAB3279226.1	CPFDLNE_01131	hypothetical protein	-	No
1131557	+	CDS	CAB3279226.1	CPFDLNE_01131	hypothetical protein	-	Yes	-	m4C
1131594	+	CDS	CAB3279226.1	CPFDLNE_01131	hypothetical protein	-	No
1131667	+	CDS	CAB3279226.1	CPFDLNE_01131	hypothetical protein	-	No
1131677	+	CDS	CAB3279226.1	CPFDLNE_01131	hypothetical protein	-	No
1131729	+	CDS	CAB3279226.1	CPFDLNE_01131	hypothetical protein	-	Yes	-	modified_base
1131766	+	CDS	CAB3279226.1	CPFDLNE_01131	hypothetical protein	-	No
1131856	+	CDS	CAB3279226.1	CPFDLNE_01131	hypothetical protein	-	Yes	-	modified_base
1131890	+	CDS	CAB3279226.1	CPFDLNE_01131	hypothetical protein	-	Yes	-	modified_base
1131930	+	CDS	CAB3279226.1	CPFDLNE_01131	hypothetical protein	-	No
1131970	+	CDS	CAB3279226.1	CPFDLNE_01131	hypothetical protein	-	Yes	-	modified_base
1132013	+	CDS	CAB3279226.1	CPFDLNE_01131	hypothetical protein	-	No
1132300	-	CDS	CAB3279227.1	CPFDLNE_01132	hypothetical protein	-	No
1132746	+	CDS	CAB3279228.1	CPFDLNE_01133	hypothetical protein	-	Yes	-	modified_base
1166908	+	CDS	CAB3279255.1	CPFDLNE_01160	hypothetical protein	-	No
1211057	+	intergenic region	-	-	-	-	Yes	+	modified_base
1211093	+	intergenic region	-	-	-	-	No
1211147	+	intergenic region	-	-	-	-	Yes	+	modified_base
1211155	+	intergenic region	-	-	-	-	No
1211178	+	intergenic region	-	-	-	-	Yes	+	modified_base
1211251	+	intergenic region	-	-	-	-	No
1211286	+	intergenic region	-	-	-	-	Yes	-	modified_base
1211297	+	intergenic region	-	-	-	-	No
1211305	+	intergenic region	-	-	-	-	No
1211321	+	intergenic region	-	-	-	-	Yes	+	modified_base
1213159	+	CDS	CAB3279311.1	OCPFDLNE_01216	Probable transcriptional regulatory protein pdtaR	pdtaR	Yes	-	modified_base
1228281	-	CDS	CAB3279328.1	OCPFDLNE_01233	Arabinose operon regulatory protein	araC	No
1228292	-	CDS	CAB3279328.1	OCPFDLNE_01233	Arabinose operon regulatory protein	araC	No
1228373	-	CDS	CAB3279328.1	OCPFDLNE_01233	Arabinose operon regulatory protein	araC	Yes	+	modified_base
1228446	-	CDS	CAB3279328.1	OCPFDLNE_01233	Arabinose operon regulatory protein	araC	No
1228459	-	CDS	CAB3279328.1	OCPFDLNE_01233	Arabinose operon regulatory protein	araC	Yes	-	modified_base
1228536	-	CDS	CAB3279328.1	OCPFDLNE_01233	Arabinose operon regulatory protein	araC	No
1228553	-	CDS	CAB3279328.1	OCPFDLNE_01233	Arabinose operon regulatory protein	araC	No
1252845	-	CDS	CAB3279358.1	CPFDLNE_01263	hypothetical protein	-	Yes	-	m4C
1252947	-	CDS	CAB3279358.1	CPFDLNE_01263	hypothetical protein	-	Yes	-	m4C
1253012	-	CDS	CAB3279358.1	CPFDLNE_01263	hypothetical protein	-	No
1253025	-	CDS	CAB3279358.1	CPFDLNE_01263	hypothetical protein	-	Yes	-	m4C
1253118	-	intergenic region	-	-	-	-	Yes	+	modified_base
1253280	+	CDS	CAB3279359.1	OCPFDLNE_01264	HTH-type transcriptional regulator YodB	yodB	No
1253300	+	CDS	CAB3279359.1	OCPFDLNE_01264	HTH-type transcriptional regulator YodB	yodB	No
1253400	+	CDS	CAB3279359.1	OCPFDLNE_01264	HTH-type transcriptional regulator YodB	yodB	No
1253409	+	CDS	CAB3279359.1	OCPFDLNE_01264	HTH-type transcriptional regulator YodB	yodB	No
1253528	+	CDS	CAB3279359.1	OCPFDLNE_01264	HTH-type transcriptional regulator YodB	yodB	No
1253553	+	CDS	CAB3279359.1	OCPFDLNE_01264	HTH-type transcriptional regulator YodB	yodB	No
1253569	+	CDS	CAB3279359.1	OCPFDLNE_01264	HTH-type transcriptional regulator YodB	yodB	Yes	-	modified_base
1253582	+	CDS	CAB3279359.1	OCPFDLNE_01264	HTH-type transcriptional regulator YodB	yodB	No
1272432	+	intergenic region	-	-	-	-	No
1272562	+	CDS	CAB3279372.1	OCPFDLNE_01277	Thioredoxin	trxA_1	Yes	-	modified_base
1272614	+	CDS	CAB3279372.1	OCPFDLNE_01277	Thioredoxin	trxA_1	No
1272649	+	CDS	CAB3279372.1	OCPFDLNE_01277	Thioredoxin	trxA_1	No
1272674	+	CDS	CAB3279372.1	OCPFDLNE_01277	Thioredoxin	trxA_1	No
1272732	+	CDS	CAB3279372.1	OCPFDLNE_01277	Thioredoxin	trxA_1	No
1272751	+	CDS	CAB3279372.1	OCPFDLNE_01277	Thioredoxin	trxA_1	Yes	+	modified_base
1280022	+	intergenic region	-	-	-	-	Yes	-	modified_base
1280052	+	CDS	CAB3279380.1	CPFDLNE_01286	hypothetical protein	-	No
1280060	+	CDS	CAB3279380.1	CPFDLNE_01286	hypothetical protein	-	No
1280101	+	CDS	CAB3279380.1	CPFDLNE_01286	hypothetical protein	-	No
1280237	+	CDS	CAB3279380.1	CPFDLNE_01286	hypothetical protein	-	No
1280284	+	CDS	CAB3279380.1	CPFDLNE_01286	hypothetical protein	-	No
1280326	+	CDS	CAB3279380.1	CPFDLNE_01286	hypothetical protein	-	No
1280375	+	CDS	CAB3279380.1	CPFDLNE_01286	hypothetical protein	-	No
1280424	+	CDS	CAB3279380.1	CPFDLNE_01286	hypothetical protein	-	No
1280514	+	CDS	CAB3279380.1	CPFDLNE_01286	hypothetical protein	-	No
1280535	+	CDS	CAB3279380.1	CPFDLNE_01286	hypothetical protein	-	No
1280562	+	CDS	CAB3279380.1	CPFDLNE_01286	hypothetical protein	-	No
1280582	+	CDS	CAB3279380.1	CPFDLNE_01286	hypothetical protein	-	No
1280621	+	CDS	CAB3279380.1	CPFDLNE_01286	hypothetical protein	-	No
1280685	+	CDS	CAB3279380.1	CPFDLNE_01286	hypothetical protein	-	Yes	+	modified_base
1280792	+	CDS	CAB3279380.1	CPFDLNE_01286	hypothetical protein	-	Yes	+	modified_base
1280804	+	CDS	CAB3279380.1	CPFDLNE_01286	hypothetical protein	-	No
1280820	+	CDS	CAB3279380.1	CPFDLNE_01286	hypothetical protein	-	Yes	+	modified_base
1280868	+	CDS	CAB3279380.1	CPFDLNE_01286	hypothetical protein	-	Yes	-	modified_base
1281039	+	CDS	CAB3279380.1	CPFDLNE_01286	hypothetical protein	-	No
1284160	+	CDS	CAB3279385.1	OCPFDLNE_01291	ATP-dependent RNA helicase DbpA	dbpA	No
1284181	+	CDS	CAB3279385.1	OCPFDLNE_01291	ATP-dependent RNA helicase DbpA	dbpA	No
1284205	+	CDS	CAB3279385.1	OCPFDLNE_01291	ATP-dependent RNA helicase DbpA	dbpA	Yes	-	modified_base
1284215	+	CDS	CAB3279385.1	OCPFDLNE_01291	ATP-dependent RNA helicase DbpA	dbpA	Yes	-	modified_base
1284253	+	CDS	CAB3279385.1	OCPFDLNE_01291	ATP-dependent RNA helicase DbpA	dbpA	No
1284315	+	CDS	CAB3279385.1	OCPFDLNE_01291	ATP-dependent RNA helicase DbpA	dbpA	Yes	-	modified_base
1284346	+	CDS	CAB3279385.1	OCPFDLNE_01291	ATP-dependent RNA helicase DbpA	dbpA	Yes	-	modified_base
1284419	+	CDS	CAB3279385.1	OCPFDLNE_01291	ATP-dependent RNA helicase DbpA	dbpA	Yes	+	modified_base
1294776	-	CDS	CAB3279398.1	CPFDLNE_01304	hypothetical protein	-	No
1294796	-	CDS	CAB3279398.1	CPFDLNE_01304	hypothetical protein	-	No
1294808	-	CDS	CAB3279398.1	CPFDLNE_01304	hypothetical protein	-	No
1294860	-	CDS	CAB3279398.1	CPFDLNE_01304	hypothetical protein	-	No
1294876	-	CDS	CAB3279398.1	CPFDLNE_01304	hypothetical protein	-	No
1294898	-	CDS	CAB3279398.1	CPFDLNE_01304	hypothetical protein	-	No
1294974	-	CDS	CAB3279398.1	CPFDLNE_01304	hypothetical protein	-	No
1295000	-	CDS	CAB3279398.1	CPFDLNE_01304	hypothetical protein	-	Yes	+	modified_base
1295034	-	CDS	CAB3279398.1	CPFDLNE_01304	hypothetical protein	-	No
1295064	-	CDS	CAB3279398.1	CPFDLNE_01304	hypothetical protein	-	Yes	-	modified_base
1295100	-	CDS	CAB3279398.1	CPFDLNE_01304	hypothetical protein	-	Yes	+	m4C
1295200	-	CDS	CAB3279398.1	CPFDLNE_01304	hypothetical protein	-	Yes	-	modified_base
1304720	+	CDS	CAB3279409.1	OCPFDLNE_01315	ATP-dependent Clp protease ATP-binding subunit ClpX	clpX	No
1304744	+	CDS	CAB3279409.1	OCPFDLNE_01315	ATP-dependent Clp protease ATP-binding subunit ClpX	clpX	Yes	-	modified_base
1304799	+	CDS	CAB3279409.1	OCPFDLNE_01315	ATP-dependent Clp protease ATP-binding subunit ClpX	clpX	No
1304817	+	CDS	CAB3279409.1	OCPFDLNE_01315	ATP-dependent Clp protease ATP-binding subunit ClpX	clpX	No
1304859	+	CDS	CAB3279409.1	OCPFDLNE_01315	ATP-dependent Clp protease ATP-binding subunit ClpX	clpX	No
1304950	+	CDS	CAB3279409.1	OCPFDLNE_01315	ATP-dependent Clp protease ATP-binding subunit ClpX	clpX	Yes	+	modified_base
1304965	+	CDS	CAB3279409.1	OCPFDLNE_01315	ATP-dependent Clp protease ATP-binding subunit ClpX	clpX	Yes	-	modified_base
1305080	+	CDS	CAB3279409.1	OCPFDLNE_01315	ATP-dependent Clp protease ATP-binding subunit ClpX	clpX	No
1305096	+	CDS	CAB3279409.1	OCPFDLNE_01315	ATP-dependent Clp protease ATP-binding subunit ClpX	clpX	No
1305152	+	CDS	CAB3279409.1	OCPFDLNE_01315	ATP-dependent Clp protease ATP-binding subunit ClpX	clpX	No
1311221	+	CDS	CAB3279416.1	OCPFDLNE_01322	Type I DNA topoisomerase	topA	No
1333459	+	intergenic region	-	-	-	-	No
1333470	+	intergenic region	-	-	-	-	No
1333513	+	CDS	CAB3279434.1	OCPFDLNE_01340	Glycerol-3-phosphate dehydrogenase	glpD	Yes	+	modified_base
1333547	+	CDS	CAB3279434.1	OCPFDLNE_01340	Glycerol-3-phosphate dehydrogenase	glpD	No
1333568	+	CDS	CAB3279434.1	OCPFDLNE_01340	Glycerol-3-phosphate dehydrogenase	glpD	No
1333579	+	CDS	CAB3279434.1	OCPFDLNE_01340	Glycerol-3-phosphate dehydrogenase	glpD	No
1333600	+	CDS	CAB3279434.1	OCPFDLNE_01340	Glycerol-3-phosphate dehydrogenase	glpD	No
1333618	+	CDS	CAB3279434.1	OCPFDLNE_01340	Glycerol-3-phosphate dehydrogenase	glpD	No
1333627	+	CDS	CAB3279434.1	OCPFDLNE_01340	Glycerol-3-phosphate dehydrogenase	glpD	Yes	+	m4C
1333798	+	CDS	CAB3279434.1	OCPFDLNE_01340	Glycerol-3-phosphate dehydrogenase	glpD	No
1333876	+	CDS	CAB3279434.1	OCPFDLNE_01340	Glycerol-3-phosphate dehydrogenase	glpD	Yes	+	modified_base
1333898	+	CDS	CAB3279434.1	OCPFDLNE_01340	Glycerol-3-phosphate dehydrogenase	glpD	No
1333947	+	CDS	CAB3279434.1	OCPFDLNE_01340	Glycerol-3-phosphate dehydrogenase	glpD	Yes	-	modified_base
1333955	+	CDS	CAB3279434.1	OCPFDLNE_01340	Glycerol-3-phosphate dehydrogenase	glpD	Yes	-	modified_base
1333984	+	CDS	CAB3279434.1	OCPFDLNE_01340	Glycerol-3-phosphate dehydrogenase	glpD	No
1333996	+	CDS	CAB3279434.1	OCPFDLNE_01340	Glycerol-3-phosphate dehydrogenase	glpD	No
1334067	+	CDS	CAB3279434.1	OCPFDLNE_01340	Glycerol-3-phosphate dehydrogenase	glpD	No
1334089	+	CDS	CAB3279434.1	OCPFDLNE_01340	Glycerol-3-phosphate dehydrogenase	glpD	No
1334111	+	CDS	CAB3279434.1	OCPFDLNE_01340	Glycerol-3-phosphate dehydrogenase	glpD	No
1334123	+	CDS	CAB3279434.1	OCPFDLNE_01340	Glycerol-3-phosphate dehydrogenase	glpD	No
1334179	+	CDS	CAB3279434.1	OCPFDLNE_01340	Glycerol-3-phosphate dehydrogenase	glpD	No
1334194	+	CDS	CAB3279434.1	OCPFDLNE_01340	Glycerol-3-phosphate dehydrogenase	glpD	No
1334208	+	CDS	CAB3279434.1	OCPFDLNE_01340	Glycerol-3-phosphate dehydrogenase	glpD	No
1334239	+	CDS	CAB3279434.1	OCPFDLNE_01340	Glycerol-3-phosphate dehydrogenase	glpD	No
1334265	+	CDS	CAB3279434.1	OCPFDLNE_01340	Glycerol-3-phosphate dehydrogenase	glpD	No
1334317	+	CDS	CAB3279434.1	OCPFDLNE_01340	Glycerol-3-phosphate dehydrogenase	glpD	No
1334327	+	CDS	CAB3279434.1	OCPFDLNE_01340	Glycerol-3-phosphate dehydrogenase	glpD	Yes	+	modified_base
1334373	+	CDS	CAB3279434.1	OCPFDLNE_01340	Glycerol-3-phosphate dehydrogenase	glpD	No
1334386	+	CDS	CAB3279434.1	OCPFDLNE_01340	Glycerol-3-phosphate dehydrogenase	glpD	No
1334466	+	CDS	CAB3279434.1	OCPFDLNE_01340	Glycerol-3-phosphate dehydrogenase	glpD	No
1334486	+	CDS	CAB3279434.1	OCPFDLNE_01340	Glycerol-3-phosphate dehydrogenase	glpD	Yes	+	modified_base
1334527	+	CDS	CAB3279434.1	OCPFDLNE_01340	Glycerol-3-phosphate dehydrogenase	glpD	No
1334565	+	CDS	CAB3279434.1	OCPFDLNE_01340	Glycerol-3-phosphate dehydrogenase	glpD	Yes	+	modified_base
1334579	+	CDS	CAB3279434.1	OCPFDLNE_01340	Glycerol-3-phosphate dehydrogenase	glpD	No
1334607	+	CDS	CAB3279434.1	OCPFDLNE_01340	Glycerol-3-phosphate dehydrogenase	glpD	Yes	-	m4C
1334650	+	CDS	CAB3279434.1	OCPFDLNE_01340	Glycerol-3-phosphate dehydrogenase	glpD	No
1334689	+	CDS	CAB3279434.1	OCPFDLNE_01340	Glycerol-3-phosphate dehydrogenase	glpD	No
1334757	+	CDS	CAB3279434.1	OCPFDLNE_01340	Glycerol-3-phosphate dehydrogenase	glpD	Yes	+	modified_base
1334808	+	CDS	CAB3279434.1	OCPFDLNE_01340	Glycerol-3-phosphate dehydrogenase	glpD	No
1334816	+	CDS	CAB3279434.1	OCPFDLNE_01340	Glycerol-3-phosphate dehydrogenase	glpD	No
1342674	-	CDS	CAB3279442.1	CPFDLNE_01348	hypothetical protein	-	No
1342737	-	CDS	CAB3279442.1	CPFDLNE_01348	hypothetical protein	-	No
1342960	-	CDS	CAB3279442.1	CPFDLNE_01348	hypothetical protein	-	No
1342968	-	CDS	CAB3279442.1	CPFDLNE_01348	hypothetical protein	-	No
1342981	-	CDS	CAB3279442.1	CPFDLNE_01348	hypothetical protein	-	No
1371673	+	intergenic region	-	-	-	-	No
1371691	+	intergenic region	-	-	-	-	No
1371747	+	CDS	CAB3279471.1	OCPFDLNE_01377	30S ribosomal protein S15	rpsO	No
1371786	+	CDS	CAB3279471.1	OCPFDLNE_01377	30S ribosomal protein S15	rpsO	No
1371811	+	CDS	CAB3279471.1	OCPFDLNE_01377	30S ribosomal protein S15	rpsO	Yes	-	modified_base
1371852	+	CDS	CAB3279471.1	OCPFDLNE_01377	30S ribosomal protein S15	rpsO	No
1371889	+	CDS	CAB3279471.1	OCPFDLNE_01377	30S ribosomal protein S15	rpsO	No
1380433	+	CDS	CAB3279481.1	CPFDLNE_01387	hypothetical protein	-	No
1380459	+	CDS	CAB3279481.1	CPFDLNE_01387	hypothetical protein	-	Yes	-	modified_base
1380500	+	CDS	CAB3279481.1	CPFDLNE_01387	hypothetical protein	-	No
1380540	+	CDS	CAB3279481.1	CPFDLNE_01387	hypothetical protein	-	No
1380597	+	CDS	CAB3279481.1	CPFDLNE_01387	hypothetical protein	-	No
1380633	+	CDS	CAB3279481.1	CPFDLNE_01387	hypothetical protein	-	Yes	-	modified_base
1380668	+	CDS	CAB3279481.1	CPFDLNE_01387	hypothetical protein	-	No
1380709	+	CDS	CAB3279481.1	CPFDLNE_01387	hypothetical protein	-	Yes	-	modified_base
1380798	+	CDS	CAB3279481.1	CPFDLNE_01387	hypothetical protein	-	Yes	+	modified_base
1381013	+	CDS	CAB3279481.1	CPFDLNE_01387	hypothetical protein	-	Yes	-	modified_base
1381030	+	CDS	CAB3279481.1	CPFDLNE_01387	hypothetical protein	-	Yes	-	modified_base
1381155	+	CDS	CAB3279481.1	CPFDLNE_01387	hypothetical protein	-	Yes	+	modified_base
1381184	+	CDS	CAB3279481.1	CPFDLNE_01387	hypothetical protein	-	No
1381225	+	CDS	CAB3279481.1	CPFDLNE_01387	hypothetical protein	-	No
1387405	+	CDS	CAB3279490.1	OCPFDLNE_01396	Aminomethyl-transferring glycine dehydrogenase subunit GcvPA	gcvPA	No
1387444	+	CDS	CAB3279490.1	OCPFDLNE_01396	Aminomethyl-transferring glycine dehydrogenase subunit GcvPA	gcvPA	No
1387606	+	CDS	CAB3279490.1	OCPFDLNE_01396	Aminomethyl-transferring glycine dehydrogenase subunit GcvPA	gcvPA	No
1387815	+	CDS	CAB3279490.1	OCPFDLNE_01396	Aminomethyl-transferring glycine dehydrogenase subunit GcvPA	gcvPA	No
1387842	+	CDS	CAB3279490.1	OCPFDLNE_01396	Aminomethyl-transferring glycine dehydrogenase subunit GcvPA	gcvPA	No
1387898	+	CDS	CAB3279490.1	OCPFDLNE_01396	Aminomethyl-transferring glycine dehydrogenase subunit GcvPA	gcvPA	No
1387960	+	CDS	CAB3279490.1	OCPFDLNE_01396	Aminomethyl-transferring glycine dehydrogenase subunit GcvPA	gcvPA	No
1388070	+	CDS	CAB3279490.1	OCPFDLNE_01396	Aminomethyl-transferring glycine dehydrogenase subunit GcvPA	gcvPA	Yes	-	modified_base
1388107	+	CDS	CAB3279490.1	OCPFDLNE_01396	Aminomethyl-transferring glycine dehydrogenase subunit GcvPA	gcvPA	No
1388182	+	CDS	CAB3279490.1	OCPFDLNE_01396	Aminomethyl-transferring glycine dehydrogenase subunit GcvPA	gcvPA	No
1388204	+	CDS	CAB3279490.1	OCPFDLNE_01396	Aminomethyl-transferring glycine dehydrogenase subunit GcvPA	gcvPA	No
1388273	+	CDS	CAB3279490.1	OCPFDLNE_01396	Aminomethyl-transferring glycine dehydrogenase subunit GcvPA	gcvPA	No
1388582	+	CDS	CAB3279491.1	OCPFDLNE_01397	Glycine dehydrogenase	gcvPB	No
1388607	+	CDS	CAB3279491.1	OCPFDLNE_01397	Glycine dehydrogenase	gcvPB	No
1388731	+	CDS	CAB3279491.1	OCPFDLNE_01397	Glycine dehydrogenase	gcvPB	No
1399846	+	intergenic region	-	-	-	-	No
1399858	+	intergenic region	-	-	-	-	No
1399922	+	CDS	CAB3279505.1	OCPFDLNE_01411	Cold shock protein CspC	cspLA	No
1399959	+	CDS	CAB3279505.1	OCPFDLNE_01411	Cold shock protein CspC	cspLA	Yes	-	modified_base
1399995	+	CDS	CAB3279505.1	OCPFDLNE_01411	Cold shock protein CspC	cspLA	Yes	-	modified_base
1400013	+	CDS	CAB3279505.1	OCPFDLNE_01411	Cold shock protein CspC	cspLA	Yes	-	modified_base
1400027	+	CDS	CAB3279505.1	OCPFDLNE_01411	Cold shock protein CspC	cspLA	No
1400043	+	CDS	CAB3279505.1	OCPFDLNE_01411	Cold shock protein CspC	cspLA	No
1400108	+	intergenic region	-	-	-	-	No
1418411	-	CDS	CAB3279521.1	OCPFDLNE_01427	Membrane protein insertase YidC	misCB	No
1418481	-	CDS	CAB3279522.1	CPFDLNE_01428	hypothetical protein	-	Yes	-	modified_base
1418578	-	CDS	CAB3279522.1	CPFDLNE_01428	hypothetical protein	-	Yes	-	modified_base
1418682	-	CDS	CAB3279522.1	CPFDLNE_01428	hypothetical protein	-	No
1426424	+	intergenic region	-	-	-	-	No
1426522	+	CDS	CAB3279530.1	OCPFDLNE_01436	Putative sugar uptake ABC transporter	tmpC	No
1426630	+	CDS	CAB3279530.1	OCPFDLNE_01436	Putative sugar uptake ABC transporter	tmpC	No
1426704	+	CDS	CAB3279530.1	OCPFDLNE_01436	Putative sugar uptake ABC transporter	tmpC	Yes	+	modified_base
1426743	+	CDS	CAB3279530.1	OCPFDLNE_01436	Putative sugar uptake ABC transporter	tmpC	No
1426866	+	CDS	CAB3279530.1	OCPFDLNE_01436	Putative sugar uptake ABC transporter	tmpC	Yes	+	modified_base
1426874	+	CDS	CAB3279530.1	OCPFDLNE_01436	Putative sugar uptake ABC transporter	tmpC	Yes	-	modified_base
1426919	+	CDS	CAB3279530.1	OCPFDLNE_01436	Putative sugar uptake ABC transporter	tmpC	No
1426931	+	CDS	CAB3279530.1	OCPFDLNE_01436	Putative sugar uptake ABC transporter	tmpC	No
1426947	+	CDS	CAB3279530.1	OCPFDLNE_01436	Putative sugar uptake ABC transporter	tmpC	No
1438675	+	CDS	CAB3279540.1	OCPFDLNE_01446	Protein RecA	recA	No
1438686	+	CDS	CAB3279540.1	OCPFDLNE_01446	Protein RecA	recA	Yes	+	modified_base
1438747	+	CDS	CAB3279540.1	OCPFDLNE_01446	Protein RecA	recA	No
1438767	+	CDS	CAB3279540.1	OCPFDLNE_01446	Protein RecA	recA	No
1438796	+	CDS	CAB3279540.1	OCPFDLNE_01446	Protein RecA	recA	No
1439495	+	intergenic region	-	-	-	-	No
1439543	+	intergenic region	-	-	-	-	No
1439563	+	intergenic region	-	-	-	-	Yes	-	m4C
1439580	+	intergenic region	-	-	-	-	No
1439639	+	CDS	CAB3279541.1	OCPFDLNE_01447	Ribonuclease Y	rny	No
1439657	+	CDS	CAB3279541.1	OCPFDLNE_01447	Ribonuclease Y	rny	No
1439769	+	CDS	CAB3279541.1	OCPFDLNE_01447	Ribonuclease Y	rny	No
1439781	+	CDS	CAB3279541.1	OCPFDLNE_01447	Ribonuclease Y	rny	No
1439828	+	CDS	CAB3279541.1	OCPFDLNE_01447	Ribonuclease Y	rny	Yes	+	modified_base
1439876	+	CDS	CAB3279541.1	OCPFDLNE_01447	Ribonuclease Y	rny	No
1439920	+	CDS	CAB3279541.1	OCPFDLNE_01447	Ribonuclease Y	rny	Yes	+	modified_base
1439963	+	CDS	CAB3279541.1	OCPFDLNE_01447	Ribonuclease Y	rny	Yes	-	modified_base
1439980	+	CDS	CAB3279541.1	OCPFDLNE_01447	Ribonuclease Y	rny	No
1439996	+	CDS	CAB3279541.1	OCPFDLNE_01447	Ribonuclease Y	rny	No
1440021	+	CDS	CAB3279541.1	OCPFDLNE_01447	Ribonuclease Y	rny	No
1448472	+	intergenic region	-	-	-	-	Yes	-	modified_base
1448514	+	CDS	CAB3279548.1	OCPFDLNE_01454	Formate C-acetyltransferase	pflB_1	No
1448564	+	CDS	CAB3279548.1	OCPFDLNE_01454	Formate C-acetyltransferase	pflB_1	No
1448628	+	CDS	CAB3279548.1	OCPFDLNE_01454	Formate C-acetyltransferase	pflB_1	No
1448752	+	CDS	CAB3279548.1	OCPFDLNE_01454	Formate C-acetyltransferase	pflB_1	No
1448884	+	CDS	CAB3279548.1	OCPFDLNE_01454	Formate C-acetyltransferase	pflB_1	No
1448945	+	CDS	CAB3279548.1	OCPFDLNE_01454	Formate C-acetyltransferase	pflB_1	Yes	+	modified_base
1467314	-	CDS	CAB3279565.1	CPFDLNE_01471	hypothetical protein	-	No
1467353	-	CDS	CAB3279565.1	CPFDLNE_01471	hypothetical protein	-	No
1467521	-	CDS	CAB3279565.1	CPFDLNE_01471	hypothetical protein	-	No
1467572	-	CDS	CAB3279565.1	CPFDLNE_01471	hypothetical protein	-	Yes	+	modified_base
1467594	-	CDS	CAB3279565.1	CPFDLNE_01471	hypothetical protein	-	No
1467602	-	CDS	CAB3279565.1	CPFDLNE_01471	hypothetical protein	-	No
1467657	-	CDS	CAB3279565.1	CPFDLNE_01471	hypothetical protein	-	No
1467667	-	CDS	CAB3279565.1	CPFDLNE_01471	hypothetical protein	-	Yes	+	m4C
1467694	-	CDS	CAB3279565.1	CPFDLNE_01471	hypothetical protein	-	Yes	-	m4C
1467820	-	CDS	CAB3279565.1	CPFDLNE_01471	hypothetical protein	-	Yes	+	m4C
1467856	-	CDS	CAB3279565.1	CPFDLNE_01471	hypothetical protein	-	Yes	+	modified_base
1467928	-	CDS	CAB3279565.1	CPFDLNE_01471	hypothetical protein	-	Yes	+	modified_base
1467974	-	CDS	CAB3279565.1	CPFDLNE_01471	hypothetical protein	-	Yes	-	modified_base
1468028	-	CDS	CAB3279565.1	CPFDLNE_01471	hypothetical protein	-	No
1468047	-	CDS	CAB3279565.1	CPFDLNE_01471	hypothetical protein	-	No
1468074	-	intergenic region	-	-	-	-	Yes	-	modified_base
1486380	-	CDS	CAB3279581.1	OCPFDLNE_01487	Superoxide dismutase	sodA	No
1486407	-	CDS	CAB3279581.1	OCPFDLNE_01487	Superoxide dismutase	sodA	Yes	-	modified_base
1500325	-	CDS	CAB3279596.1	OCPFDLNE_01502	RNA polymerase sigma factor SigA	sigA	Yes	-	modified_base
1500336	-	CDS	CAB3279596.1	OCPFDLNE_01502	RNA polymerase sigma factor SigA	sigA	Yes	+	m4C
1500364	-	CDS	CAB3279596.1	OCPFDLNE_01502	RNA polymerase sigma factor SigA	sigA	No
1513642	-	CDS	CAB3279609.1	CPFDLNE_01515	Phosphate starvation-inducible protein PhoH	-	No
1513696	-	CDS	CAB3279609.1	CPFDLNE_01515	Phosphate starvation-inducible protein PhoH	-	No
1513753	-	CDS	CAB3279609.1	CPFDLNE_01515	Phosphate starvation-inducible protein PhoH	-	No
1513787	-	CDS	CAB3279609.1	CPFDLNE_01515	Phosphate starvation-inducible protein PhoH	-	Yes	-	modified_base
1513960	-	CDS	CAB3279609.1	CPFDLNE_01515	Phosphate starvation-inducible protein PhoH	-	No
1513974	-	CDS	CAB3279609.1	CPFDLNE_01515	Phosphate starvation-inducible protein PhoH	-	No
1514069	-	CDS	CAB3279609.1	CPFDLNE_01515	Phosphate starvation-inducible protein PhoH	-	No
1514086	-	CDS	CAB3279609.1	CPFDLNE_01515	Phosphate starvation-inducible protein PhoH	-	No
1514340	-	CDS	CAB3279610.1	OCPFDLNE_01516	GatB/Yqey domain-containing protein	yqeY	Yes	+	modified_base
1514353	-	CDS	CAB3279610.1	OCPFDLNE_01516	GatB/Yqey domain-containing protein	yqeY	Yes	-	modified_base
1514378	-	CDS	CAB3279610.1	OCPFDLNE_01516	GatB/Yqey domain-containing protein	yqeY	No
1514411	-	CDS	CAB3279610.1	OCPFDLNE_01516	GatB/Yqey domain-containing protein	yqeY	No
1514443	-	CDS	CAB3279610.1	OCPFDLNE_01516	GatB/Yqey domain-containing protein	yqeY	Yes	+	modified_base
1514479	-	CDS	CAB3279610.1	OCPFDLNE_01516	GatB/Yqey domain-containing protein	yqeY	No
1514508	-	CDS	CAB3279610.1	OCPFDLNE_01516	GatB/Yqey domain-containing protein	yqeY	No
1514525	-	CDS	CAB3279610.1	OCPFDLNE_01516	GatB/Yqey domain-containing protein	yqeY	No
1514557	-	CDS	CAB3279610.1	OCPFDLNE_01516	GatB/Yqey domain-containing protein	yqeY	Yes	+	modified_base
1514591	-	CDS	CAB3279610.1	OCPFDLNE_01516	GatB/Yqey domain-containing protein	yqeY	No
1514690	-	CDS	CAB3279610.1	OCPFDLNE_01516	GatB/Yqey domain-containing protein	yqeY	Yes	-	modified_base
1514726	-	CDS	CAB3279610.1	OCPFDLNE_01516	GatB/Yqey domain-containing protein	yqeY	Yes	+	modified_base
1514779	-	CDS	CAB3279611.1	OCPFDLNE_01517	30S ribosomal protein S21	rpsU	Yes	-	m4C
1514818	-	CDS	CAB3279611.1	OCPFDLNE_01517	30S ribosomal protein S21	rpsU	No
1514893	-	CDS	CAB3279611.1	OCPFDLNE_01517	30S ribosomal protein S21	rpsU	No
1514901	-	CDS	CAB3279611.1	OCPFDLNE_01517	30S ribosomal protein S21	rpsU	Yes	+	m4C
1514931	-	CDS	CAB3279611.1	OCPFDLNE_01517	30S ribosomal protein S21	rpsU	No
1514946	-	intergenic region	-	-	-	-	No
1514957	-	intergenic region	-	-	-	-	No
1540291	-	intergenic region	-	-	-	-	Yes	+	modified_base
1540335	-	CDS	CAB3279638.1	OCPFDLNE_01544	Transcription elongation factor GreA	greA	No
1544379	-	CDS	CAB3279643.1	CPFDLNE_01549	hypothetical protein	-	No
1544520	-	CDS	CAB3279643.1	CPFDLNE_01549	hypothetical protein	-	No
1544630	-	CDS	CAB3279644.1	OCPFDLNE_01550	Putative pre-16S rRNA nuclease	yrrK	No
1544645	-	CDS	CAB3279644.1	OCPFDLNE_01550	Putative pre-16S rRNA nuclease	yrrK	Yes	+	modified_base
1544654	-	CDS	CAB3279644.1	OCPFDLNE_01550	Putative pre-16S rRNA nuclease	yrrK	No
1544679	-	CDS	CAB3279644.1	OCPFDLNE_01550	Putative pre-16S rRNA nuclease	yrrK	No
1544690	-	CDS	CAB3279644.1	OCPFDLNE_01550	Putative pre-16S rRNA nuclease	yrrK	No
1544726	-	CDS	CAB3279644.1	OCPFDLNE_01550	Putative pre-16S rRNA nuclease	yrrK	Yes	-	modified_base
1544770	-	CDS	CAB3279644.1	OCPFDLNE_01550	Putative pre-16S rRNA nuclease	yrrK	No
1544789	-	CDS	CAB3279644.1	OCPFDLNE_01550	Putative pre-16S rRNA nuclease	yrrK	Yes	+	modified_base
1544806	-	CDS	CAB3279644.1	OCPFDLNE_01550	Putative pre-16S rRNA nuclease	yrrK	Yes	-	modified_base
1544847	-	CDS	CAB3279644.1	OCPFDLNE_01550	Putative pre-16S rRNA nuclease	yrrK	Yes	+	modified_base
1544878	-	CDS	CAB3279644.1	OCPFDLNE_01550	Putative pre-16S rRNA nuclease	yrrK	No
1544946	-	CDS	CAB3279644.1	OCPFDLNE_01550	Putative pre-16S rRNA nuclease	yrrK	No
1544970	-	CDS	CAB3279644.1	OCPFDLNE_01550	Putative pre-16S rRNA nuclease	yrrK	No
1544994	-	CDS	CAB3279644.1	OCPFDLNE_01550	Putative pre-16S rRNA nuclease	yrrK	No
1545067	-	CDS	CAB3279645.1	CPFDLNE_01551	hypothetical protein	-	Yes	+	modified_base
1545102	-	CDS	CAB3279645.1	CPFDLNE_01551	hypothetical protein	-	No
1545180	-	CDS	CAB3279645.1	CPFDLNE_01551	hypothetical protein	-	No
1545224	-	CDS	CAB3279645.1	CPFDLNE_01551	hypothetical protein	-	No
1545240	-	CDS	CAB3279645.1	CPFDLNE_01551	hypothetical protein	-	No
1545268	-	CDS	CAB3279645.1	CPFDLNE_01551	hypothetical protein	-	Yes	-	modified_base
1545294	-	intergenic region	-	-	-	-	Yes	-	modified_base
1559254	-	intergenic region	-	-	-	-	No
1559286	-	intergenic region	-	-	-	-	No
1559303	-	intergenic region	-	-	-	-	No
1559344	-	intergenic region	-	-	-	-	No
1559362	-	intergenic region	-	-	-	-	No
1559392	-	intergenic region	-	-	-	-	Yes	-	modified_base
1574492	-	CDS	CAB3279668.1	OCPFDLNE_01574	YrvD	lapA	Yes	-	modified_base
1574665	-	CDS	CAB3279668.1	OCPFDLNE_01574	YrvD	lapA	No
1586365	-	CDS	CAB3279680.1	OCPFDLNE_01586	Glycerol kinase	glpK_2	Yes	-	modified_base
1586459	-	CDS	CAB3279680.1	OCPFDLNE_01586	Glycerol kinase	glpK_2	No
1588755	-	intergenic region	-	-	-	-	Yes	+	modified_base
1622394	-	CDS	CAB3279712.1	OCPFDLNE_01618	Pyruvate kinase	pyk	No
1622424	-	CDS	CAB3279712.1	OCPFDLNE_01618	Pyruvate kinase	pyk	No
1622463	-	CDS	CAB3279712.1	OCPFDLNE_01618	Pyruvate kinase	pyk	No
1622528	-	CDS	CAB3279712.1	OCPFDLNE_01618	Pyruvate kinase	pyk	No
1622538	-	CDS	CAB3279712.1	OCPFDLNE_01618	Pyruvate kinase	pyk	No
1622583	-	CDS	CAB3279712.1	OCPFDLNE_01618	Pyruvate kinase	pyk	Yes	-	modified_base
1622600	-	CDS	CAB3279712.1	OCPFDLNE_01618	Pyruvate kinase	pyk	No
1622678	-	CDS	CAB3279712.1	OCPFDLNE_01618	Pyruvate kinase	pyk	No
1622729	-	CDS	CAB3279712.1	OCPFDLNE_01618	Pyruvate kinase	pyk	No
1622751	-	CDS	CAB3279712.1	OCPFDLNE_01618	Pyruvate kinase	pyk	No
1622857	-	intergenic region	-	-	-	-	No
1622882	-	intergenic region	-	-	-	-	No
1622962	-	intergenic region	-	-	-	-	No
1635449	+	intergenic region	-	-	-	-	Yes	+	modified_base
1635477	+	CDS	CAB3279722.1	CPFDLNE_01628	Universal stress protein UspA	-	Yes	+	modified_base
1635636	+	CDS	CAB3279722.1	CPFDLNE_01628	Universal stress protein UspA	-	No
1635684	+	CDS	CAB3279722.1	CPFDLNE_01628	Universal stress protein UspA	-	No
1635699	+	CDS	CAB3279722.1	CPFDLNE_01628	Universal stress protein UspA	-	Yes	-	modified_base
1635707	+	CDS	CAB3279722.1	CPFDLNE_01628	Universal stress protein UspA	-	Yes	-	modified_base
1635801	+	CDS	CAB3279722.1	CPFDLNE_01628	Universal stress protein UspA	-	Yes	-	modified_base
1635840	+	CDS	CAB3279722.1	CPFDLNE_01628	Universal stress protein UspA	-	Yes	+	modified_base
1635876	+	CDS	CAB3279722.1	CPFDLNE_01628	Universal stress protein UspA	-	Yes	-	modified_base
1635899	+	CDS	CAB3279722.1	CPFDLNE_01628	Universal stress protein UspA	-	Yes	+	modified_base
1656837	-	CDS	CAB3279742.1	CPFDLNE_01648	General stress protein	-	No
1656869	-	CDS	CAB3279742.1	CPFDLNE_01648	General stress protein	-	No
1656884	-	CDS	CAB3279742.1	CPFDLNE_01648	General stress protein	-	No
1656931	-	CDS	CAB3279742.1	CPFDLNE_01648	General stress protein	-	No
1656955	-	CDS	CAB3279742.1	CPFDLNE_01648	General stress protein	-	Yes	-	modified_base
1656973	-	CDS	CAB3279742.1	CPFDLNE_01648	General stress protein	-	No
1656993	-	CDS	CAB3279742.1	CPFDLNE_01648	General stress protein	-	No
1657043	-	CDS	CAB3279742.1	CPFDLNE_01648	General stress protein	-	No
1657061	-	CDS	CAB3279742.1	CPFDLNE_01648	General stress protein	-	Yes	+	modified_base
1657075	-	CDS	CAB3279742.1	CPFDLNE_01648	General stress protein	-	Yes	-	modified_base
1657091	-	CDS	CAB3279742.1	CPFDLNE_01648	General stress protein	-	Yes	-	modified_base
1657121	-	CDS	CAB3279742.1	CPFDLNE_01648	General stress protein	-	No
1657168	-	CDS	CAB3279742.1	CPFDLNE_01648	General stress protein	-	No
1657179	-	CDS	CAB3279742.1	CPFDLNE_01648	General stress protein	-	No
1657200	-	CDS	CAB3279742.1	CPFDLNE_01648	General stress protein	-	No
1657236	-	CDS	CAB3279742.1	CPFDLNE_01648	General stress protein	-	No
1657249	-	CDS	CAB3279742.1	CPFDLNE_01648	General stress protein	-	Yes	-	modified_base
1657285	-	CDS	CAB3279742.1	CPFDLNE_01648	General stress protein	-	No
1657345	-	CDS	CAB3279742.1	CPFDLNE_01648	General stress protein	-	No
1657394	-	CDS	CAB3279743.1	CPFDLNE_01649	YtxG	-	Yes	-	modified_base
1657405	-	CDS	CAB3279743.1	CPFDLNE_01649	YtxG	-	Yes	-	modified_base
1657435	-	CDS	CAB3279743.1	CPFDLNE_01649	YtxG	-	Yes	-	modified_base
1657489	-	CDS	CAB3279743.1	CPFDLNE_01649	YtxG	-	No
1657588	-	CDS	CAB3279743.1	CPFDLNE_01649	YtxG	-	No
1657625	-	CDS	CAB3279743.1	CPFDLNE_01649	YtxG	-	No
1657651	-	CDS	CAB3279743.1	CPFDLNE_01649	YtxG	-	No
1657674	-	CDS	CAB3279743.1	CPFDLNE_01649	YtxG	-	No
1657693	-	CDS	CAB3279743.1	CPFDLNE_01649	YtxG	-	No
1657724	-	CDS	CAB3279743.1	CPFDLNE_01649	YtxG	-	No
1657784	-	CDS	CAB3279743.1	CPFDLNE_01649	YtxG	-	Yes	-	m4C
1657802	-	CDS	CAB3279743.1	CPFDLNE_01649	YtxG	-	No
1657820	-	CDS	CAB3279743.1	CPFDLNE_01649	YtxG	-	No
1657829	-	CDS	CAB3279743.1	CPFDLNE_01649	YtxG	-	No
1657839	-	intergenic region	-	-	-	-	Yes	-	modified_base
1657855	-	intergenic region	-	-	-	-	No
1657887	-	intergenic region	-	-	-	-	Yes	-	modified_base
1663841	-	CDS	CAB3279747.1	OCPFDLNE_01653	DNA translocase SftA	sftA	No
1688739	+	intergenic region	-	-	-	-	Yes	-	modified_base
1688747	+	intergenic region	-	-	-	-	No
1688834	+	CDS	CAB3279774.1	OCPFDLNE_01680	Bifunctional acetaldehyde-CoA/alcohol dehydrogenase	adhE_4	Yes	-	modified_base
1688844	+	CDS	CAB3279774.1	OCPFDLNE_01680	Bifunctional acetaldehyde-CoA/alcohol dehydrogenase	adhE_4	Yes	+	m4C
1688861	+	CDS	CAB3279774.1	OCPFDLNE_01680	Bifunctional acetaldehyde-CoA/alcohol dehydrogenase	adhE_4	Yes	+	modified_base
1688882	+	CDS	CAB3279774.1	OCPFDLNE_01680	Bifunctional acetaldehyde-CoA/alcohol dehydrogenase	adhE_4	No
1688901	+	CDS	CAB3279774.1	OCPFDLNE_01680	Bifunctional acetaldehyde-CoA/alcohol dehydrogenase	adhE_4	No
1689012	+	CDS	CAB3279774.1	OCPFDLNE_01680	Bifunctional acetaldehyde-CoA/alcohol dehydrogenase	adhE_4	No
1689027	+	CDS	CAB3279774.1	OCPFDLNE_01680	Bifunctional acetaldehyde-CoA/alcohol dehydrogenase	adhE_4	Yes	-	m4C
1689112	+	CDS	CAB3279774.1	OCPFDLNE_01680	Bifunctional acetaldehyde-CoA/alcohol dehydrogenase	adhE_4	No
1689149	+	CDS	CAB3279774.1	OCPFDLNE_01680	Bifunctional acetaldehyde-CoA/alcohol dehydrogenase	adhE_4	No
1689166	+	CDS	CAB3279774.1	OCPFDLNE_01680	Bifunctional acetaldehyde-CoA/alcohol dehydrogenase	adhE_4	No
1689202	+	CDS	CAB3279774.1	OCPFDLNE_01680	Bifunctional acetaldehyde-CoA/alcohol dehydrogenase	adhE_4	Yes	-	modified_base
1689316	+	CDS	CAB3279774.1	OCPFDLNE_01680	Bifunctional acetaldehyde-CoA/alcohol dehydrogenase	adhE_4	No
1689362	+	CDS	CAB3279774.1	OCPFDLNE_01680	Bifunctional acetaldehyde-CoA/alcohol dehydrogenase	adhE_4	Yes	+	modified_base
1689405	+	CDS	CAB3279774.1	OCPFDLNE_01680	Bifunctional acetaldehyde-CoA/alcohol dehydrogenase	adhE_4	No
1689493	+	CDS	CAB3279774.1	OCPFDLNE_01680	Bifunctional acetaldehyde-CoA/alcohol dehydrogenase	adhE_4	No
1689505	+	CDS	CAB3279774.1	OCPFDLNE_01680	Bifunctional acetaldehyde-CoA/alcohol dehydrogenase	adhE_4	No
1689566	+	CDS	CAB3279774.1	OCPFDLNE_01680	Bifunctional acetaldehyde-CoA/alcohol dehydrogenase	adhE_4	Yes	+	modified_base
1689615	+	CDS	CAB3279774.1	OCPFDLNE_01680	Bifunctional acetaldehyde-CoA/alcohol dehydrogenase	adhE_4	No
1689636	+	CDS	CAB3279774.1	OCPFDLNE_01680	Bifunctional acetaldehyde-CoA/alcohol dehydrogenase	adhE_4	No
1689652	+	CDS	CAB3279774.1	OCPFDLNE_01680	Bifunctional acetaldehyde-CoA/alcohol dehydrogenase	adhE_4	Yes	-	modified_base
1689698	+	CDS	CAB3279774.1	OCPFDLNE_01680	Bifunctional acetaldehyde-CoA/alcohol dehydrogenase	adhE_4	Yes	+	modified_base
1689745	+	CDS	CAB3279774.1	OCPFDLNE_01680	Bifunctional acetaldehyde-CoA/alcohol dehydrogenase	adhE_4	No
1689788	+	CDS	CAB3279774.1	OCPFDLNE_01680	Bifunctional acetaldehyde-CoA/alcohol dehydrogenase	adhE_4	No
1690040	+	CDS	CAB3279774.1	OCPFDLNE_01680	Bifunctional acetaldehyde-CoA/alcohol dehydrogenase	adhE_4	Yes	-	m4C
1690327	+	CDS	CAB3279774.1	OCPFDLNE_01680	Bifunctional acetaldehyde-CoA/alcohol dehydrogenase	adhE_4	No
1690438	+	CDS	CAB3279774.1	OCPFDLNE_01680	Bifunctional acetaldehyde-CoA/alcohol dehydrogenase	adhE_4	Yes	+	modified_base
1690492	+	CDS	CAB3279774.1	OCPFDLNE_01680	Bifunctional acetaldehyde-CoA/alcohol dehydrogenase	adhE_4	No
1690531	+	CDS	CAB3279774.1	OCPFDLNE_01680	Bifunctional acetaldehyde-CoA/alcohol dehydrogenase	adhE_4	No
1690656	+	CDS	CAB3279774.1	OCPFDLNE_01680	Bifunctional acetaldehyde-CoA/alcohol dehydrogenase	adhE_4	Yes	+	modified_base
1691146	+	CDS	CAB3279774.1	OCPFDLNE_01680	Bifunctional acetaldehyde-CoA/alcohol dehydrogenase	adhE_4	Yes	+	modified_base
1691227	+	CDS	CAB3279774.1	OCPFDLNE_01680	Bifunctional acetaldehyde-CoA/alcohol dehydrogenase	adhE_4	No
1691250	+	CDS	CAB3279774.1	OCPFDLNE_01680	Bifunctional acetaldehyde-CoA/alcohol dehydrogenase	adhE_4	No
1755914	-	intergenic region	-	-	-	-	No
1755948	-	rRNA		OCPFDLNE_01752	23S ribosomal RNA	-	Yes	-	m4C
1755971	-	rRNA		OCPFDLNE_01752	23S ribosomal RNA	-	No
1755982	-	rRNA		OCPFDLNE_01752	23S ribosomal RNA	-	Yes	-	modified_base
1755993	-	rRNA		OCPFDLNE_01752	23S ribosomal RNA	-	Yes	-	modified_base
1756006	-	rRNA		OCPFDLNE_01752	23S ribosomal RNA	-	No
1756016	-	rRNA		OCPFDLNE_01752	23S ribosomal RNA	-	Yes	-	modified_base
1756039	-	rRNA		OCPFDLNE_01752	23S ribosomal RNA	-	No
1756050	-	rRNA		OCPFDLNE_01752	23S ribosomal RNA	-	Yes	+	modified_base
1756067	-	rRNA		OCPFDLNE_01752	23S ribosomal RNA	-	Yes	-	modified_base
1756108	-	rRNA		OCPFDLNE_01752	23S ribosomal RNA	-	No
1756142	-	rRNA		OCPFDLNE_01752	23S ribosomal RNA	-	No
1756179	-	rRNA		OCPFDLNE_01752	23S ribosomal RNA	-	No
1756215	-	rRNA		OCPFDLNE_01752	23S ribosomal RNA	-	No
1756223	-	rRNA		OCPFDLNE_01752	23S ribosomal RNA	-	Yes	-	modified_base
1756244	-	rRNA		OCPFDLNE_01752	23S ribosomal RNA	-	Yes	-	modified_base
1756278	-	rRNA		OCPFDLNE_01752	23S ribosomal RNA	-	No
1756310	-	rRNA		OCPFDLNE_01752	23S ribosomal RNA	-	No
1756323	-	rRNA		OCPFDLNE_01752	23S ribosomal RNA	-	No
1756332	-	rRNA		OCPFDLNE_01752	23S ribosomal RNA	-	No
1756342	-	rRNA		OCPFDLNE_01752	23S ribosomal RNA	-	No
1756366	-	rRNA		OCPFDLNE_01752	23S ribosomal RNA	-	No
1756377	-	rRNA		OCPFDLNE_01752	23S ribosomal RNA	-	No
1756386	-	rRNA		OCPFDLNE_01752	23S ribosomal RNA	-	No
1756404	-	rRNA		OCPFDLNE_01752	23S ribosomal RNA	-	Yes	-	modified_base
1756440	-	rRNA		OCPFDLNE_01752	23S ribosomal RNA	-	Yes	-	m4C
1756490	-	rRNA		OCPFDLNE_01752	23S ribosomal RNA	-	No
1756514	-	rRNA		OCPFDLNE_01752	23S ribosomal RNA	-	No
1756542	-	rRNA		OCPFDLNE_01752	23S ribosomal RNA	-	No
1756563	-	rRNA		OCPFDLNE_01752	23S ribosomal RNA	-	No
1756573	-	rRNA		OCPFDLNE_01752	23S ribosomal RNA	-	No
1756591	-	rRNA		OCPFDLNE_01752	23S ribosomal RNA	-	No
1756644	-	rRNA		OCPFDLNE_01752	23S ribosomal RNA	-	No
1756657	-	rRNA		OCPFDLNE_01752	23S ribosomal RNA	-	No
1756701	-	rRNA		OCPFDLNE_01752	23S ribosomal RNA	-	Yes	+	modified_base
1756729	-	rRNA		OCPFDLNE_01752	23S ribosomal RNA	-	No
1756758	-	rRNA		OCPFDLNE_01752	23S ribosomal RNA	-	No
1756779	-	rRNA		OCPFDLNE_01752	23S ribosomal RNA	-	Yes	-	modified_base
1756834	-	rRNA		OCPFDLNE_01752	23S ribosomal RNA	-	Yes	-	modified_base
1756845	-	rRNA		OCPFDLNE_01752	23S ribosomal RNA	-	No
1756862	-	rRNA		OCPFDLNE_01752	23S ribosomal RNA	-	No
1756895	-	rRNA		OCPFDLNE_01752	23S ribosomal RNA	-	Yes	+	modified_base
1756905	-	rRNA		OCPFDLNE_01752	23S ribosomal RNA	-	No
1756918	-	rRNA		OCPFDLNE_01752	23S ribosomal RNA	-	Yes	+	modified_base
1756955	-	rRNA		OCPFDLNE_01752	23S ribosomal RNA	-	No
1756983	-	rRNA		OCPFDLNE_01752	23S ribosomal RNA	-	Yes	+	m4C
1756997	-	rRNA		OCPFDLNE_01752	23S ribosomal RNA	-	No
1757079	-	rRNA		OCPFDLNE_01752	23S ribosomal RNA	-	Yes	-	modified_base
1757152	-	rRNA		OCPFDLNE_01752	23S ribosomal RNA	-	No
1757162	-	rRNA		OCPFDLNE_01752	23S ribosomal RNA	-	No
1757174	-	rRNA		OCPFDLNE_01752	23S ribosomal RNA	-	No
1757211	-	rRNA		OCPFDLNE_01752	23S ribosomal RNA	-	Yes	-	modified_base
1757226	-	rRNA		OCPFDLNE_01752	23S ribosomal RNA	-	Yes	+	modified_base
1757253	-	rRNA		OCPFDLNE_01752	23S ribosomal RNA	-	Yes	-	modified_base
1757274	-	rRNA		OCPFDLNE_01752	23S ribosomal RNA	-	Yes	+	modified_base
1757283	-	rRNA		OCPFDLNE_01752	23S ribosomal RNA	-	No
1757311	-	rRNA		OCPFDLNE_01752	23S ribosomal RNA	-	No
1757333	-	rRNA		OCPFDLNE_01752	23S ribosomal RNA	-	Yes	+	modified_base
1757360	-	rRNA		OCPFDLNE_01752	23S ribosomal RNA	-	No
1757378	-	rRNA		OCPFDLNE_01752	23S ribosomal RNA	-	No
1757397	-	rRNA		OCPFDLNE_01752	23S ribosomal RNA	-	No
1757415	-	rRNA		OCPFDLNE_01752	23S ribosomal RNA	-	Yes	-	modified_base
1757423	-	rRNA		OCPFDLNE_01752	23S ribosomal RNA	-	Yes	-	modified_base
1757437	-	rRNA		OCPFDLNE_01752	23S ribosomal RNA	-	Yes	-	modified_base
1757519	-	rRNA		OCPFDLNE_01752	23S ribosomal RNA	-	No
1757532	-	rRNA		OCPFDLNE_01752	23S ribosomal RNA	-	Yes	-	m4C
1757557	-	rRNA		OCPFDLNE_01752	23S ribosomal RNA	-	Yes	-	modified_base
1757565	-	rRNA		OCPFDLNE_01752	23S ribosomal RNA	-	No
1757578	-	rRNA		OCPFDLNE_01752	23S ribosomal RNA	-	Yes	-	modified_base
1757622	-	rRNA		OCPFDLNE_01752	23S ribosomal RNA	-	Yes	-	modified_base
1757637	-	rRNA		OCPFDLNE_01752	23S ribosomal RNA	-	Yes	+	modified_base
1757673	-	rRNA		OCPFDLNE_01752	23S ribosomal RNA	-	No
1757711	-	rRNA		OCPFDLNE_01752	23S ribosomal RNA	-	Yes	-	modified_base
1757733	-	rRNA		OCPFDLNE_01752	23S ribosomal RNA	-	No
1757742	-	rRNA		OCPFDLNE_01752	23S ribosomal RNA	-	No
1757803	-	rRNA		OCPFDLNE_01752	23S ribosomal RNA	-	No
1757813	-	rRNA		OCPFDLNE_01752	23S ribosomal RNA	-	Yes	+	modified_base
1757840	-	rRNA		OCPFDLNE_01752	23S ribosomal RNA	-	No
1757860	-	rRNA		OCPFDLNE_01752	23S ribosomal RNA	-	No
1757895	-	rRNA		OCPFDLNE_01752	23S ribosomal RNA	-	No
1757934	-	rRNA		OCPFDLNE_01752	23S ribosomal RNA	-	No
1757963	-	rRNA		OCPFDLNE_01752	23S ribosomal RNA	-	Yes	-	m4C
1758040	-	rRNA		OCPFDLNE_01752	23S ribosomal RNA	-	Yes	+	modified_base
1758055	-	rRNA		OCPFDLNE_01752	23S ribosomal RNA	-	No
1758098	-	rRNA		OCPFDLNE_01752	23S ribosomal RNA	-	Yes	-	modified_base
1758115	-	rRNA		OCPFDLNE_01752	23S ribosomal RNA	-	No
1758146	-	rRNA		OCPFDLNE_01752	23S ribosomal RNA	-	No
1758173	-	rRNA		OCPFDLNE_01752	23S ribosomal RNA	-	Yes	-	m4C
1758204	-	rRNA		OCPFDLNE_01752	23S ribosomal RNA	-	Yes	-	modified_base
1758230	-	rRNA		OCPFDLNE_01752	23S ribosomal RNA	-	No
1758268	-	rRNA		OCPFDLNE_01752	23S ribosomal RNA	-	Yes	-	modified_base
1758319	-	rRNA		OCPFDLNE_01752	23S ribosomal RNA	-	Yes	+	modified_base
1758395	-	rRNA		OCPFDLNE_01752	23S ribosomal RNA	-	No
1758409	-	rRNA		OCPFDLNE_01752	23S ribosomal RNA	-	No
1758460	-	rRNA		OCPFDLNE_01752	23S ribosomal RNA	-	Yes	-	modified_base
1758476	-	rRNA		OCPFDLNE_01752	23S ribosomal RNA	-	No
1758516	-	rRNA		OCPFDLNE_01752	23S ribosomal RNA	-	No
1758531	-	rRNA		OCPFDLNE_01752	23S ribosomal RNA	-	Yes	-	modified_base
1758550	-	rRNA		OCPFDLNE_01752	23S ribosomal RNA	-	Yes	-	modified_base
1758566	-	rRNA		OCPFDLNE_01752	23S ribosomal RNA	-	No
1758587	-	rRNA		OCPFDLNE_01752	23S ribosomal RNA	-	Yes	-	modified_base
1758641	-	rRNA		OCPFDLNE_01752	23S ribosomal RNA	-	No
1758665	-	rRNA		OCPFDLNE_01752	23S ribosomal RNA	-	Yes	+	modified_base
1758673	-	rRNA		OCPFDLNE_01752	23S ribosomal RNA	-	Yes	+	modified_base
1758706	-	rRNA		OCPFDLNE_01752	23S ribosomal RNA	-	No
1758764	-	rRNA		OCPFDLNE_01752	23S ribosomal RNA	-	Yes	-	modified_base
1758777	-	rRNA		OCPFDLNE_01752	23S ribosomal RNA	-	Yes	-	modified_base
1758791	-	rRNA		OCPFDLNE_01752	23S ribosomal RNA	-	No
1758819	-	rRNA		OCPFDLNE_01752	23S ribosomal RNA	-	No
1759105	-	rRNA		OCPFDLNE_01753	16S ribosomal RNA	-	Yes	-	modified_base
1759118	-	rRNA		OCPFDLNE_01753	16S ribosomal RNA	-	No
1759139	-	rRNA		OCPFDLNE_01753	16S ribosomal RNA	-	No
1759157	-	rRNA		OCPFDLNE_01753	16S ribosomal RNA	-	Yes	+	modified_base
1759188	-	rRNA		OCPFDLNE_01753	16S ribosomal RNA	-	No
1759203	-	rRNA		OCPFDLNE_01753	16S ribosomal RNA	-	No
1759227	-	rRNA		OCPFDLNE_01753	16S ribosomal RNA	-	Yes	-	modified_base
1759235	-	rRNA		OCPFDLNE_01753	16S ribosomal RNA	-	Yes	+	m4C
1759306	-	rRNA		OCPFDLNE_01753	16S ribosomal RNA	-	No
1759342	-	rRNA		OCPFDLNE_01753	16S ribosomal RNA	-	No
1759362	-	rRNA		OCPFDLNE_01753	16S ribosomal RNA	-	Yes	-	modified_base
1759397	-	rRNA		OCPFDLNE_01753	16S ribosomal RNA	-	No
1759448	-	rRNA		OCPFDLNE_01753	16S ribosomal RNA	-	No
1759462	-	rRNA		OCPFDLNE_01753	16S ribosomal RNA	-	Yes	-	modified_base
1759510	-	rRNA		OCPFDLNE_01753	16S ribosomal RNA	-	No
1759521	-	rRNA		OCPFDLNE_01753	16S ribosomal RNA	-	No
1759551	-	rRNA		OCPFDLNE_01753	16S ribosomal RNA	-	No
1759574	-	rRNA		OCPFDLNE_01753	16S ribosomal RNA	-	No
1759587	-	rRNA		OCPFDLNE_01753	16S ribosomal RNA	-	No
1759598	-	rRNA		OCPFDLNE_01753	16S ribosomal RNA	-	No
1759617	-	rRNA		OCPFDLNE_01753	16S ribosomal RNA	-	Yes	-	modified_base
1759659	-	rRNA		OCPFDLNE_01753	16S ribosomal RNA	-	No
1759671	-	rRNA		OCPFDLNE_01753	16S ribosomal RNA	-	No
1759690	-	rRNA		OCPFDLNE_01753	16S ribosomal RNA	-	No
1759714	-	rRNA		OCPFDLNE_01753	16S ribosomal RNA	-	Yes	-	modified_base
1759752	-	rRNA		OCPFDLNE_01753	16S ribosomal RNA	-	Yes	-	modified_base
1759768	-	rRNA		OCPFDLNE_01753	16S ribosomal RNA	-	Yes	-	modified_base
1759776	-	rRNA		OCPFDLNE_01753	16S ribosomal RNA	-	Yes	+	m4C
1759804	-	rRNA		OCPFDLNE_01753	16S ribosomal RNA	-	Yes	-	modified_base
1759816	-	rRNA		OCPFDLNE_01753	16S ribosomal RNA	-	No
1759835	-	rRNA		OCPFDLNE_01753	16S ribosomal RNA	-	Yes	+	modified_base
1759845	-	rRNA		OCPFDLNE_01753	16S ribosomal RNA	-	No
1759859	-	rRNA		OCPFDLNE_01753	16S ribosomal RNA	-	No
1759882	-	rRNA		OCPFDLNE_01753	16S ribosomal RNA	-	No
1759908	-	rRNA		OCPFDLNE_01753	16S ribosomal RNA	-	No
1759925	-	rRNA		OCPFDLNE_01753	16S ribosomal RNA	-	Yes	-	modified_base
1759933	-	rRNA		OCPFDLNE_01753	16S ribosomal RNA	-	No
1759974	-	rRNA		OCPFDLNE_01753	16S ribosomal RNA	-	Yes	-	modified_base
1760009	-	rRNA		OCPFDLNE_01753	16S ribosomal RNA	-	Yes	-	modified_base
1760028	-	rRNA		OCPFDLNE_01753	16S ribosomal RNA	-	No
1760038	-	rRNA		OCPFDLNE_01753	16S ribosomal RNA	-	No
1760086	-	rRNA		OCPFDLNE_01753	16S ribosomal RNA	-	Yes	-	m4C
1760098	-	rRNA		OCPFDLNE_01753	16S ribosomal RNA	-	No
1760110	-	rRNA		OCPFDLNE_01753	16S ribosomal RNA	-	Yes	-	m4C
1760118	-	rRNA		OCPFDLNE_01753	16S ribosomal RNA	-	Yes	+	modified_base
1760172	-	rRNA		OCPFDLNE_01753	16S ribosomal RNA	-	No
1760190	-	rRNA		OCPFDLNE_01753	16S ribosomal RNA	-	Yes	-	modified_base
1760205	-	rRNA		OCPFDLNE_01753	16S ribosomal RNA	-	Yes	+	modified_base
1760223	-	rRNA		OCPFDLNE_01753	16S ribosomal RNA	-	No
1760255	-	rRNA		OCPFDLNE_01753	16S ribosomal RNA	-	No
1760288	-	rRNA		OCPFDLNE_01753	16S ribosomal RNA	-	Yes	+	m4C
1760299	-	rRNA		OCPFDLNE_01753	16S ribosomal RNA	-	No
1760331	-	rRNA		OCPFDLNE_01753	16S ribosomal RNA	-	No
1760374	-	rRNA		OCPFDLNE_01753	16S ribosomal RNA	-	Yes	-	modified_base
1760407	-	rRNA		OCPFDLNE_01753	16S ribosomal RNA	-	No
1760430	-	rRNA		OCPFDLNE_01753	16S ribosomal RNA	-	No
1760463	-	rRNA		OCPFDLNE_01753	16S ribosomal RNA	-	Yes	+	modified_base
1760472	-	rRNA		OCPFDLNE_01753	16S ribosomal RNA	-	No
1760495	-	rRNA		OCPFDLNE_01753	16S ribosomal RNA	-	No
1760503	-	rRNA		OCPFDLNE_01753	16S ribosomal RNA	-	No
1760528	-	rRNA		OCPFDLNE_01753	16S ribosomal RNA	-	No
1760536	-	rRNA		OCPFDLNE_01753	16S ribosomal RNA	-	No
1760550	-	rRNA		OCPFDLNE_01753	16S ribosomal RNA	-	No
1762342	-	CDS	CAB3279825.1	OCPFDLNE_01755	Glycerate dehydrogenase	hprA	No
1762452	-	CDS	CAB3279825.1	OCPFDLNE_01755	Glycerate dehydrogenase	hprA	Yes	-	modified_base
1762491	-	CDS	CAB3279825.1	OCPFDLNE_01755	Glycerate dehydrogenase	hprA	No
1762504	-	CDS	CAB3279825.1	OCPFDLNE_01755	Glycerate dehydrogenase	hprA	No
1762536	-	CDS	CAB3279825.1	OCPFDLNE_01755	Glycerate dehydrogenase	hprA	No
1765222	-	intergenic region	-	-	-	-	No
1765246	-	CDS	CAB3279828.1	CPFDLNE_01758	Cysteinyl-tRNA synthetase related protein	-	No
1765259	-	CDS	CAB3279828.1	CPFDLNE_01758	Cysteinyl-tRNA synthetase related protein	-	No
1765301	-	CDS	CAB3279828.1	CPFDLNE_01758	Cysteinyl-tRNA synthetase related protein	-	No
1765371	-	CDS	CAB3279828.1	CPFDLNE_01758	Cysteinyl-tRNA synthetase related protein	-	No
1765405	-	CDS	CAB3279828.1	CPFDLNE_01758	Cysteinyl-tRNA synthetase related protein	-	No
1765482	-	CDS	CAB3279828.1	CPFDLNE_01758	Cysteinyl-tRNA synthetase related protein	-	No
1765525	-	CDS	CAB3279828.1	CPFDLNE_01758	Cysteinyl-tRNA synthetase related protein	-	Yes	-	modified_base
1765610	-	CDS	CAB3279828.1	CPFDLNE_01758	Cysteinyl-tRNA synthetase related protein	-	No
1765650	-	CDS	CAB3279828.1	CPFDLNE_01758	Cysteinyl-tRNA synthetase related protein	-	No
1765690	-	CDS	CAB3279828.1	CPFDLNE_01758	Cysteinyl-tRNA synthetase related protein	-	No
1765749	-	CDS	CAB3279828.1	CPFDLNE_01758	Cysteinyl-tRNA synthetase related protein	-	No
1765762	-	CDS	CAB3279828.1	CPFDLNE_01758	Cysteinyl-tRNA synthetase related protein	-	Yes	-	modified_base
1765771	-	intergenic region	-	-	-	-	No
1765781	-	intergenic region	-	-	-	-	No
1767888	+	intergenic region	-	-	-	-	Yes	-	modified_base
1767954	+	intergenic region	-	-	-	-	No
1768011	+	CDS	CAB3279831.1	OCPFDLNE_01761	YfhP	yfhP	Yes	+	m4C
1768040	+	CDS	CAB3279831.1	OCPFDLNE_01761	YfhP	yfhP	No
1768068	+	CDS	CAB3279831.1	OCPFDLNE_01761	YfhP	yfhP	Yes	+	modified_base
1768254	+	CDS	CAB3279831.1	OCPFDLNE_01761	YfhP	yfhP	No
1768297	+	CDS	CAB3279831.1	OCPFDLNE_01761	YfhP	yfhP	No
1768327	+	CDS	CAB3279831.1	OCPFDLNE_01761	YfhP	yfhP	No
1768346	+	CDS	CAB3279831.1	OCPFDLNE_01761	YfhP	yfhP	Yes	+	modified_base
1768435	+	CDS	CAB3279831.1	OCPFDLNE_01761	YfhP	yfhP	No
1768554	+	CDS	CAB3279831.1	OCPFDLNE_01761	YfhP	yfhP	No
1768597	+	CDS	CAB3279831.1	OCPFDLNE_01761	YfhP	yfhP	No
1768860	+	CDS	CAB3279831.1	OCPFDLNE_01761	YfhP	yfhP	No
1770711	+	CDS	CAB3279835.1	CPFDLNE_01765	Putative CDP-abequose synthase	-	Yes	-	modified_base
1770760	+	CDS	CAB3279835.1	CPFDLNE_01765	Putative CDP-abequose synthase	-	Yes	+	modified_base
1770777	+	CDS	CAB3279835.1	CPFDLNE_01765	Putative CDP-abequose synthase	-	Yes	-	m6A
1770794	+	CDS	CAB3279835.1	CPFDLNE_01765	Putative CDP-abequose synthase	-	Yes	+	m4C
1770813	+	CDS	CAB3279835.1	CPFDLNE_01765	Putative CDP-abequose synthase	-	No
1770832	+	CDS	CAB3279835.1	CPFDLNE_01765	Putative CDP-abequose synthase	-	No
1770901	+	CDS	CAB3279835.1	CPFDLNE_01765	Putative CDP-abequose synthase	-	No
1770975	+	CDS	CAB3279835.1	CPFDLNE_01765	Putative CDP-abequose synthase	-	Yes	-	modified_base
1771001	+	CDS	CAB3279835.1	CPFDLNE_01765	Putative CDP-abequose synthase	-	No
1822762	-	intergenic region	-	-	-	-	No
1822777	-	intergenic region	-	-	-	-	Yes	-	modified_base
1822842	-	intergenic region	-	-	-	-	Yes	-	modified_base
1861687	-	rRNA		OCPFDLNE_01849	5S ribosomal RNA	-	No
1861841	-	intergenic region	-	-	-	-	No
1861875	-	rRNA		OCPFDLNE_01850	23S ribosomal RNA	-	Yes	-	m4C
1861888	-	rRNA		OCPFDLNE_01850	23S ribosomal RNA	-	Yes	-	modified_base
1861898	-	rRNA		OCPFDLNE_01850	23S ribosomal RNA	-	No
1861909	-	rRNA		OCPFDLNE_01850	23S ribosomal RNA	-	Yes	-	modified_base
1861921	-	rRNA		OCPFDLNE_01850	23S ribosomal RNA	-	No
1861933	-	rRNA		OCPFDLNE_01850	23S ribosomal RNA	-	No
1861942	-	rRNA		OCPFDLNE_01850	23S ribosomal RNA	-	Yes	+	modified_base
1861966	-	rRNA		OCPFDLNE_01850	23S ribosomal RNA	-	No
1861977	-	rRNA		OCPFDLNE_01850	23S ribosomal RNA	-	No
1861994	-	rRNA		OCPFDLNE_01850	23S ribosomal RNA	-	No
1862035	-	rRNA		OCPFDLNE_01850	23S ribosomal RNA	-	Yes	+	modified_base
1862069	-	rRNA		OCPFDLNE_01850	23S ribosomal RNA	-	Yes	-	modified_base
1862106	-	rRNA		OCPFDLNE_01850	23S ribosomal RNA	-	No
1862142	-	rRNA		OCPFDLNE_01850	23S ribosomal RNA	-	No
1862150	-	rRNA		OCPFDLNE_01850	23S ribosomal RNA	-	Yes	-	modified_base
1862171	-	rRNA		OCPFDLNE_01850	23S ribosomal RNA	-	Yes	-	modified_base
1862205	-	rRNA		OCPFDLNE_01850	23S ribosomal RNA	-	No
1862237	-	rRNA		OCPFDLNE_01850	23S ribosomal RNA	-	No
1862250	-	rRNA		OCPFDLNE_01850	23S ribosomal RNA	-	No
1862259	-	rRNA		OCPFDLNE_01850	23S ribosomal RNA	-	No
1862269	-	rRNA		OCPFDLNE_01850	23S ribosomal RNA	-	Yes	+	modified_base
1862293	-	rRNA		OCPFDLNE_01850	23S ribosomal RNA	-	No
1862304	-	rRNA		OCPFDLNE_01850	23S ribosomal RNA	-	No
1862313	-	rRNA		OCPFDLNE_01850	23S ribosomal RNA	-	Yes	-	modified_base
1862331	-	rRNA		OCPFDLNE_01850	23S ribosomal RNA	-	No
1862367	-	rRNA		OCPFDLNE_01850	23S ribosomal RNA	-	Yes	-	m4C
1862441	-	rRNA		OCPFDLNE_01850	23S ribosomal RNA	-	No
1862469	-	rRNA		OCPFDLNE_01850	23S ribosomal RNA	-	No
1862490	-	rRNA		OCPFDLNE_01850	23S ribosomal RNA	-	No
1862500	-	rRNA		OCPFDLNE_01850	23S ribosomal RNA	-	No
1862518	-	rRNA		OCPFDLNE_01850	23S ribosomal RNA	-	No
1862571	-	rRNA		OCPFDLNE_01850	23S ribosomal RNA	-	No
1862584	-	rRNA		OCPFDLNE_01850	23S ribosomal RNA	-	Yes	-	modified_base
1862628	-	rRNA		OCPFDLNE_01850	23S ribosomal RNA	-	Yes	+	modified_base
1862656	-	rRNA		OCPFDLNE_01850	23S ribosomal RNA	-	No
1862685	-	rRNA		OCPFDLNE_01850	23S ribosomal RNA	-	No
1862706	-	rRNA		OCPFDLNE_01850	23S ribosomal RNA	-	Yes	-	modified_base
1862761	-	rRNA		OCPFDLNE_01850	23S ribosomal RNA	-	Yes	-	modified_base
1862772	-	rRNA		OCPFDLNE_01850	23S ribosomal RNA	-	No
1862789	-	rRNA		OCPFDLNE_01850	23S ribosomal RNA	-	No
1862822	-	rRNA		OCPFDLNE_01850	23S ribosomal RNA	-	Yes	+	modified_base
1862832	-	rRNA		OCPFDLNE_01850	23S ribosomal RNA	-	No
1862845	-	rRNA		OCPFDLNE_01850	23S ribosomal RNA	-	Yes	+	modified_base
1862882	-	rRNA		OCPFDLNE_01850	23S ribosomal RNA	-	Yes	+	modified_base
1862910	-	rRNA		OCPFDLNE_01850	23S ribosomal RNA	-	Yes	+	m4C
1862924	-	rRNA		OCPFDLNE_01850	23S ribosomal RNA	-	No
1863006	-	rRNA		OCPFDLNE_01850	23S ribosomal RNA	-	No
1863079	-	rRNA		OCPFDLNE_01850	23S ribosomal RNA	-	No
1863089	-	rRNA		OCPFDLNE_01850	23S ribosomal RNA	-	No
1863101	-	rRNA		OCPFDLNE_01850	23S ribosomal RNA	-	No
1863138	-	rRNA		OCPFDLNE_01850	23S ribosomal RNA	-	Yes	-	modified_base
1863153	-	rRNA		OCPFDLNE_01850	23S ribosomal RNA	-	Yes	+	modified_base
1863180	-	rRNA		OCPFDLNE_01850	23S ribosomal RNA	-	No
1863201	-	rRNA		OCPFDLNE_01850	23S ribosomal RNA	-	Yes	+	modified_base
1863210	-	rRNA		OCPFDLNE_01850	23S ribosomal RNA	-	No
1863238	-	rRNA		OCPFDLNE_01850	23S ribosomal RNA	-	No
1863260	-	rRNA		OCPFDLNE_01850	23S ribosomal RNA	-	Yes	+	modified_base
1863287	-	rRNA		OCPFDLNE_01850	23S ribosomal RNA	-	No
1863305	-	rRNA		OCPFDLNE_01850	23S ribosomal RNA	-	No
1863324	-	rRNA		OCPFDLNE_01850	23S ribosomal RNA	-	No
1863342	-	rRNA		OCPFDLNE_01850	23S ribosomal RNA	-	Yes	-	modified_base
1863351	-	rRNA		OCPFDLNE_01850	23S ribosomal RNA	-	No
1863364	-	rRNA		OCPFDLNE_01850	23S ribosomal RNA	-	No
1863448	-	rRNA		OCPFDLNE_01850	23S ribosomal RNA	-	No
1863459	-	rRNA		OCPFDLNE_01850	23S ribosomal RNA	-	Yes	-	m4C
1863484	-	rRNA		OCPFDLNE_01850	23S ribosomal RNA	-	Yes	-	modified_base
1863492	-	rRNA		OCPFDLNE_01850	23S ribosomal RNA	-	No
1863505	-	rRNA		OCPFDLNE_01850	23S ribosomal RNA	-	Yes	-	modified_base
1863532	-	rRNA		OCPFDLNE_01850	23S ribosomal RNA	-	Yes	+	modified_base
1863549	-	rRNA		OCPFDLNE_01850	23S ribosomal RNA	-	Yes	-	modified_base
1863564	-	rRNA		OCPFDLNE_01850	23S ribosomal RNA	-	No
1863600	-	rRNA		OCPFDLNE_01850	23S ribosomal RNA	-	No
1863638	-	rRNA		OCPFDLNE_01850	23S ribosomal RNA	-	Yes	-	modified_base
1863660	-	rRNA		OCPFDLNE_01850	23S ribosomal RNA	-	No
1863669	-	rRNA		OCPFDLNE_01850	23S ribosomal RNA	-	No
1863730	-	rRNA		OCPFDLNE_01850	23S ribosomal RNA	-	No
1863740	-	rRNA		OCPFDLNE_01850	23S ribosomal RNA	-	No
1863767	-	rRNA		OCPFDLNE_01850	23S ribosomal RNA	-	No
1863788	-	rRNA		OCPFDLNE_01850	23S ribosomal RNA	-	Yes	-	modified_base
1863820	-	rRNA		OCPFDLNE_01850	23S ribosomal RNA	-	No
1863861	-	rRNA		OCPFDLNE_01850	23S ribosomal RNA	-	No
1863890	-	rRNA		OCPFDLNE_01850	23S ribosomal RNA	-	Yes	+	modified_base
1863967	-	rRNA		OCPFDLNE_01850	23S ribosomal RNA	-	Yes	+	modified_base
1863982	-	rRNA		OCPFDLNE_01850	23S ribosomal RNA	-	No
1864025	-	rRNA		OCPFDLNE_01850	23S ribosomal RNA	-	No
1864042	-	rRNA		OCPFDLNE_01850	23S ribosomal RNA	-	No
1864073	-	rRNA		OCPFDLNE_01850	23S ribosomal RNA	-	No
1864100	-	rRNA		OCPFDLNE_01850	23S ribosomal RNA	-	No
1864131	-	rRNA		OCPFDLNE_01850	23S ribosomal RNA	-	Yes	-	modified_base
1864157	-	rRNA		OCPFDLNE_01850	23S ribosomal RNA	-	No
1864195	-	rRNA		OCPFDLNE_01850	23S ribosomal RNA	-	No
1864246	-	rRNA		OCPFDLNE_01850	23S ribosomal RNA	-	Yes	+	modified_base
1864322	-	rRNA		OCPFDLNE_01850	23S ribosomal RNA	-	No
1864336	-	rRNA		OCPFDLNE_01850	23S ribosomal RNA	-	No
1864387	-	rRNA		OCPFDLNE_01850	23S ribosomal RNA	-	Yes	-	modified_base
1864403	-	rRNA		OCPFDLNE_01850	23S ribosomal RNA	-	No
1864442	-	rRNA		OCPFDLNE_01850	23S ribosomal RNA	-	No
1864458	-	rRNA		OCPFDLNE_01850	23S ribosomal RNA	-	Yes	-	modified_base
1864477	-	rRNA		OCPFDLNE_01850	23S ribosomal RNA	-	Yes	-	modified_base
1864493	-	rRNA		OCPFDLNE_01850	23S ribosomal RNA	-	No
1864514	-	rRNA		OCPFDLNE_01850	23S ribosomal RNA	-	No
1864568	-	rRNA		OCPFDLNE_01850	23S ribosomal RNA	-	No
1864592	-	rRNA		OCPFDLNE_01850	23S ribosomal RNA	-	Yes	+	modified_base
1864600	-	rRNA		OCPFDLNE_01850	23S ribosomal RNA	-	No
1864632	-	rRNA		OCPFDLNE_01850	23S ribosomal RNA	-	Yes	-	modified_base
1864691	-	rRNA		OCPFDLNE_01850	23S ribosomal RNA	-	Yes	-	modified_base
1864704	-	rRNA		OCPFDLNE_01850	23S ribosomal RNA	-	Yes	-	modified_base
1864718	-	rRNA		OCPFDLNE_01850	23S ribosomal RNA	-	No
1864746	-	rRNA		OCPFDLNE_01850	23S ribosomal RNA	-	No
1865013	-	intergenic region	-	-	-	-	No
1865032	-	rRNA		OCPFDLNE_01851	16S ribosomal RNA	-	Yes	-	modified_base
1865045	-	rRNA		OCPFDLNE_01851	16S ribosomal RNA	-	No
1865066	-	rRNA		OCPFDLNE_01851	16S ribosomal RNA	-	No
1865084	-	rRNA		OCPFDLNE_01851	16S ribosomal RNA	-	Yes	+	modified_base
1865115	-	rRNA		OCPFDLNE_01851	16S ribosomal RNA	-	No
1865130	-	rRNA		OCPFDLNE_01851	16S ribosomal RNA	-	No
1865154	-	rRNA		OCPFDLNE_01851	16S ribosomal RNA	-	Yes	-	modified_base
1865162	-	rRNA		OCPFDLNE_01851	16S ribosomal RNA	-	Yes	-	modified_base
1865233	-	rRNA		OCPFDLNE_01851	16S ribosomal RNA	-	No
1865269	-	rRNA		OCPFDLNE_01851	16S ribosomal RNA	-	No
1865289	-	rRNA		OCPFDLNE_01851	16S ribosomal RNA	-	No
1865324	-	rRNA		OCPFDLNE_01851	16S ribosomal RNA	-	No
1865375	-	rRNA		OCPFDLNE_01851	16S ribosomal RNA	-	No
1865437	-	rRNA		OCPFDLNE_01851	16S ribosomal RNA	-	No
1865448	-	rRNA		OCPFDLNE_01851	16S ribosomal RNA	-	No
1865478	-	rRNA		OCPFDLNE_01851	16S ribosomal RNA	-	Yes	-	modified_base
1865501	-	rRNA		OCPFDLNE_01851	16S ribosomal RNA	-	No
1865514	-	rRNA		OCPFDLNE_01851	16S ribosomal RNA	-	No
1865525	-	rRNA		OCPFDLNE_01851	16S ribosomal RNA	-	No
1865544	-	rRNA		OCPFDLNE_01851	16S ribosomal RNA	-	Yes	-	modified_base
1865586	-	rRNA		OCPFDLNE_01851	16S ribosomal RNA	-	No
1865598	-	rRNA		OCPFDLNE_01851	16S ribosomal RNA	-	No
1865617	-	rRNA		OCPFDLNE_01851	16S ribosomal RNA	-	No
1865641	-	rRNA		OCPFDLNE_01851	16S ribosomal RNA	-	No
1865679	-	rRNA		OCPFDLNE_01851	16S ribosomal RNA	-	Yes	-	m4C
1865695	-	rRNA		OCPFDLNE_01851	16S ribosomal RNA	-	Yes	+	modified_base
1865703	-	rRNA		OCPFDLNE_01851	16S ribosomal RNA	-	Yes	+	m4C
1865731	-	rRNA		OCPFDLNE_01851	16S ribosomal RNA	-	Yes	-	modified_base
1865743	-	rRNA		OCPFDLNE_01851	16S ribosomal RNA	-	No
1865762	-	rRNA		OCPFDLNE_01851	16S ribosomal RNA	-	Yes	-	modified_base
1865771	-	rRNA		OCPFDLNE_01851	16S ribosomal RNA	-	No
1865786	-	rRNA		OCPFDLNE_01851	16S ribosomal RNA	-	Yes	-	modified_base
1865809	-	rRNA		OCPFDLNE_01851	16S ribosomal RNA	-	Yes	+	modified_base
1865835	-	rRNA		OCPFDLNE_01851	16S ribosomal RNA	-	No
1865852	-	rRNA		OCPFDLNE_01851	16S ribosomal RNA	-	Yes	-	modified_base
1865860	-	rRNA		OCPFDLNE_01851	16S ribosomal RNA	-	No
1865869	-	rRNA		OCPFDLNE_01851	16S ribosomal RNA	-	Yes	-	modified_base
1865901	-	rRNA		OCPFDLNE_01851	16S ribosomal RNA	-	Yes	-	modified_base
1865936	-	rRNA		OCPFDLNE_01851	16S ribosomal RNA	-	Yes	-	modified_base
1865955	-	rRNA		OCPFDLNE_01851	16S ribosomal RNA	-	No
1865965	-	rRNA		OCPFDLNE_01851	16S ribosomal RNA	-	No
1866036	-	rRNA		OCPFDLNE_01851	16S ribosomal RNA	-	No
1866044	-	rRNA		OCPFDLNE_01851	16S ribosomal RNA	-	No
1866099	-	rRNA		OCPFDLNE_01851	16S ribosomal RNA	-	No
1866117	-	rRNA		OCPFDLNE_01851	16S ribosomal RNA	-	No
1866132	-	rRNA		OCPFDLNE_01851	16S ribosomal RNA	-	No
1866150	-	rRNA		OCPFDLNE_01851	16S ribosomal RNA	-	No
1866182	-	rRNA		OCPFDLNE_01851	16S ribosomal RNA	-	No
1866215	-	rRNA		OCPFDLNE_01851	16S ribosomal RNA	-	No
1866226	-	rRNA		OCPFDLNE_01851	16S ribosomal RNA	-	No
1866257	-	rRNA		OCPFDLNE_01851	16S ribosomal RNA	-	No
1866301	-	rRNA		OCPFDLNE_01851	16S ribosomal RNA	-	No
1866334	-	rRNA		OCPFDLNE_01851	16S ribosomal RNA	-	No
1866357	-	rRNA		OCPFDLNE_01851	16S ribosomal RNA	-	No
1866389	-	rRNA		OCPFDLNE_01851	16S ribosomal RNA	-	No
1866398	-	rRNA		OCPFDLNE_01851	16S ribosomal RNA	-	No
1866422	-	rRNA		OCPFDLNE_01851	16S ribosomal RNA	-	No
1866430	-	rRNA		OCPFDLNE_01851	16S ribosomal RNA	-	No
1866455	-	rRNA		OCPFDLNE_01851	16S ribosomal RNA	-	No
1866463	-	rRNA		OCPFDLNE_01851	16S ribosomal RNA	-	No
1866477	-	rRNA		OCPFDLNE_01851	16S ribosomal RNA	-	No
1877734	-	CDS	CAB3279934.1	OCPFDLNE_01868	tRNA (guanine-N(1)-)-methyltransferase	trmD	No
1937876	-	CDS	CAB3279989.1	OCPFDLNE_01923	Manganese ABC transporter substrate-binding protein MntA	mntA	Yes	-	modified_base
1937981	-	CDS	CAB3279989.1	OCPFDLNE_01923	Manganese ABC transporter substrate-binding protein MntA	mntA	Yes	-	modified_base
1938006	-	CDS	CAB3279989.1	OCPFDLNE_01923	Manganese ABC transporter substrate-binding protein MntA	mntA	No
1938025	-	CDS	CAB3279989.1	OCPFDLNE_01923	Manganese ABC transporter substrate-binding protein MntA	mntA	Yes	+	modified_base
1938091	-	CDS	CAB3279989.1	OCPFDLNE_01923	Manganese ABC transporter substrate-binding protein MntA	mntA	Yes	-	m6A
1938202	-	CDS	CAB3279989.1	OCPFDLNE_01923	Manganese ABC transporter substrate-binding protein MntA	mntA	Yes	-	modified_base
1938219	-	CDS	CAB3279989.1	OCPFDLNE_01923	Manganese ABC transporter substrate-binding protein MntA	mntA	No
1938288	-	CDS	CAB3279989.1	OCPFDLNE_01923	Manganese ABC transporter substrate-binding protein MntA	mntA	No
1939522	-	CDS	CAB3279991.1	OCPFDLNE_01925	Manganese transport system ATP-binding protein MntB	fecE	Yes	+	modified_base
1939653	-	CDS	CAB3279991.1	OCPFDLNE_01925	Manganese transport system ATP-binding protein MntB	fecE	No
1939782	-	CDS	CAB3279991.1	OCPFDLNE_01925	Manganese transport system ATP-binding protein MntB	fecE	No
1939826	-	CDS	CAB3279991.1	OCPFDLNE_01925	Manganese transport system ATP-binding protein MntB	fecE	Yes	+	modified_base
1939906	-	CDS	CAB3279991.1	OCPFDLNE_01925	Manganese transport system ATP-binding protein MntB	fecE	No
1939947	-	CDS	CAB3279991.1	OCPFDLNE_01925	Manganese transport system ATP-binding protein MntB	fecE	Yes	+	modified_base
1940014	-	CDS	CAB3279991.1	OCPFDLNE_01925	Manganese transport system ATP-binding protein MntB	fecE	Yes	-	modified_base
1940051	-	CDS	CAB3279991.1	OCPFDLNE_01925	Manganese transport system ATP-binding protein MntB	fecE	No
1940091	-	CDS	CAB3279991.1	OCPFDLNE_01925	Manganese transport system ATP-binding protein MntB	fecE	No
1940100	-	CDS	CAB3279991.1	OCPFDLNE_01925	Manganese transport system ATP-binding protein MntB	fecE	Yes	-	modified_base
1940125	-	CDS	CAB3279991.1	OCPFDLNE_01925	Manganese transport system ATP-binding protein MntB	fecE	No
1940141	-	intergenic region	-	-	-	-	No
1975620	-	CDS	CAB3280029.1	CPFDLNE_01963	hypothetical protein	-	No
1975636	-	CDS	CAB3280029.1	CPFDLNE_01963	hypothetical protein	-	Yes	-	modified_base
1975666	-	CDS	CAB3280029.1	CPFDLNE_01963	hypothetical protein	-	Yes	-	modified_base
1975697	-	intergenic region	-	-	-	-	Yes	-	modified_base
1975706	-	intergenic region	-	-	-	-	Yes	+	modified_base
1975720	-	intergenic region	-	-	-	-	Yes	+	modified_base
1975732	-	intergenic region	-	-	-	-	Yes	-	modified_base
1975771	-	intergenic region	-	-	-	-	Yes	-	modified_base
1975791	-	intergenic region	-	-	-	-	Yes	-	modified_base
1975803	-	intergenic region	-	-	-	-	Yes	-	modified_base
1975855	-	intergenic region	-	-	-	-	No
1975865	-	intergenic region	-	-	-	-	Yes	-	m4C
1975950	-	intergenic region	-	-	-	-	No
1975983	-	intergenic region	-	-	-	-	No
1982381	-	CDS	CAB3280037.1	OCPFDLNE_01971	DnaD and phage-associated domain	dnaD	Yes	-	modified_base
1982461	-	CDS	CAB3280037.1	OCPFDLNE_01971	DnaD and phage-associated domain	dnaD	No
1982659	-	CDS	CAB3280037.1	OCPFDLNE_01971	DnaD and phage-associated domain	dnaD	No
1982668	-	CDS	CAB3280037.1	OCPFDLNE_01971	DnaD and phage-associated domain	dnaD	No
2022103	-	intergenic region	-	-	-	-	Yes	-	m4C
2022125	-	CDS	CAB3280076.1	OCPFDLNE_02010	Bacterial nucleoid protein Hbs	hup	No
2022139	-	CDS	CAB3280076.1	OCPFDLNE_02010	Bacterial nucleoid protein Hbs	hup	Yes	+	modified_base
2022173	-	CDS	CAB3280076.1	OCPFDLNE_02010	Bacterial nucleoid protein Hbs	hup	No
2022183	-	CDS	CAB3280076.1	OCPFDLNE_02010	Bacterial nucleoid protein Hbs	hup	No
2022228	-	CDS	CAB3280076.1	OCPFDLNE_02010	Bacterial nucleoid protein Hbs	hup	Yes	-	modified_base
2022242	-	CDS	CAB3280076.1	OCPFDLNE_02010	Bacterial nucleoid protein Hbs	hup	No
2022257	-	CDS	CAB3280076.1	OCPFDLNE_02010	Bacterial nucleoid protein Hbs	hup	Yes	+	modified_base
2022272	-	CDS	CAB3280076.1	OCPFDLNE_02010	Bacterial nucleoid protein Hbs	hup	No
2022319	-	CDS	CAB3280076.1	OCPFDLNE_02010	Bacterial nucleoid protein Hbs	hup	Yes	+	m4C
2022328	-	CDS	CAB3280076.1	OCPFDLNE_02010	Bacterial nucleoid protein Hbs	hup	No
2022376	-	CDS	CAB3280076.1	OCPFDLNE_02010	Bacterial nucleoid protein Hbs	hup	No
2022409	-	intergenic region	-	-	-	-	Yes	+	m4C
2022477	-	intergenic region	-	-	-	-	Yes	-	modified_base
2022495	-	intergenic region	-	-	-	-	No
2022507	-	intergenic region	-	-	-	-	No
2022636	-	intergenic region	-	-	-	-	No
2029888	-	CDS	CAB3280083.1	OCPFDLNE_02017	Peptidoglycan-binding protein LysM	ebpS	No
2029926	-	CDS	CAB3280083.1	OCPFDLNE_02017	Peptidoglycan-binding protein LysM	ebpS	No
2029934	-	CDS	CAB3280083.1	OCPFDLNE_02017	Peptidoglycan-binding protein LysM	ebpS	No
2030081	-	CDS	CAB3280083.1	OCPFDLNE_02017	Peptidoglycan-binding protein LysM	ebpS	No
2030097	-	CDS	CAB3280083.1	OCPFDLNE_02017	Peptidoglycan-binding protein LysM	ebpS	No
2030197	-	CDS	CAB3280083.1	OCPFDLNE_02017	Peptidoglycan-binding protein LysM	ebpS	No
2030220	-	CDS	CAB3280083.1	OCPFDLNE_02017	Peptidoglycan-binding protein LysM	ebpS	Yes	-	modified_base
2030229	-	CDS	CAB3280083.1	OCPFDLNE_02017	Peptidoglycan-binding protein LysM	ebpS	No
2030279	-	CDS	CAB3280083.1	OCPFDLNE_02017	Peptidoglycan-binding protein LysM	ebpS	No
2030307	-	CDS	CAB3280083.1	OCPFDLNE_02017	Peptidoglycan-binding protein LysM	ebpS	No
2030367	-	intergenic region	-	-	-	-	No
2030409	-	intergenic region	-	-	-	-	No
2044693	-	CDS	CAB3280098.1	OCPFDLNE_02032	Transcriptional repressor	fur	No
2044930	-	CDS	CAB3280098.1	OCPFDLNE_02032	Transcriptional repressor	fur	No
2044959	-	CDS	CAB3280098.1	OCPFDLNE_02032	Transcriptional repressor	fur	Yes	+	modified_base
2044997	-	CDS	CAB3280098.1	OCPFDLNE_02032	Transcriptional repressor	fur	Yes	-	modified_base
2054020	+	intergenic region	-	-	-	-	No
2054052	+	intergenic region	-	-	-	-	No
2054064	+	intergenic region	-	-	-	-	No
2054214	+	CDS	CAB3280108.1	CPFDLNE_02042	5-bromo-4-chloroindolyl phosphate hydrolysis protein	-	No
2054302	+	CDS	CAB3280108.1	CPFDLNE_02042	5-bromo-4-chloroindolyl phosphate hydrolysis protein	-	No
2054425	+	CDS	CAB3280108.1	CPFDLNE_02042	5-bromo-4-chloroindolyl phosphate hydrolysis protein	-	No
2054713	+	CDS	CAB3280109.1	CPFDLNE_02043	Tellurite resistance protein TelA	-	No
2054733	+	CDS	CAB3280109.1	CPFDLNE_02043	Tellurite resistance protein TelA	-	No
2054790	+	CDS	CAB3280109.1	CPFDLNE_02043	Tellurite resistance protein TelA	-	No
2054863	+	CDS	CAB3280109.1	CPFDLNE_02043	Tellurite resistance protein TelA	-	No
2054881	+	CDS	CAB3280109.1	CPFDLNE_02043	Tellurite resistance protein TelA	-	Yes	+	modified_base
2080049	+	CDS	CAB3280134.1	OCPFDLNE_02068	Alpha-acetolactate decarboxylase	alsD	No
2108694	-	CDS	CAB3280158.1	OCPFDLNE_02092	Cold shock protein CspD	cspD_2	Yes	+	modified_base
2108751	-	CDS	CAB3280158.1	OCPFDLNE_02092	Cold shock protein CspD	cspD_2	Yes	-	m4C
2108820	-	CDS	CAB3280158.1	OCPFDLNE_02092	Cold shock protein CspD	cspD_2	No
2125409	-	CDS	CAB3280173.1	OCPFDLNE_02107	Cell division protein SepF	sepF	No
2125437	-	CDS	CAB3280173.1	OCPFDLNE_02107	Cell division protein SepF	sepF	Yes	+	modified_base
2125461	-	CDS	CAB3280173.1	OCPFDLNE_02107	Cell division protein SepF	sepF	No
2125518	-	CDS	CAB3280174.1	CPFDLNE_02108	YggS family pyridoxal phosphate-dependent enzyme (Fragment)	-	Yes	-	modified_base
2125544	-	CDS	CAB3280174.1	CPFDLNE_02108	YggS family pyridoxal phosphate-dependent enzyme (Fragment)	-	No
2125573	-	CDS	CAB3280174.1	CPFDLNE_02108	YggS family pyridoxal phosphate-dependent enzyme (Fragment)	-	No
2125600	-	CDS	CAB3280174.1	CPFDLNE_02108	YggS family pyridoxal phosphate-dependent enzyme (Fragment)	-	No
2125629	-	CDS	CAB3280174.1	CPFDLNE_02108	YggS family pyridoxal phosphate-dependent enzyme (Fragment)	-	No
2125650	-	CDS	CAB3280174.1	CPFDLNE_02108	YggS family pyridoxal phosphate-dependent enzyme (Fragment)	-	No
2125676	-	CDS	CAB3280174.1	CPFDLNE_02108	YggS family pyridoxal phosphate-dependent enzyme (Fragment)	-	No
2125774	-	CDS	CAB3280174.1	CPFDLNE_02108	YggS family pyridoxal phosphate-dependent enzyme (Fragment)	-	Yes	-	modified_base
2125785	-	CDS	CAB3280174.1	CPFDLNE_02108	YggS family pyridoxal phosphate-dependent enzyme (Fragment)	-	No
2125815	-	CDS	CAB3280174.1	CPFDLNE_02108	YggS family pyridoxal phosphate-dependent enzyme (Fragment)	-	No
2125915	-	CDS	CAB3280174.1	CPFDLNE_02108	YggS family pyridoxal phosphate-dependent enzyme (Fragment)	-	No
2126058	-	CDS	CAB3280174.1	CPFDLNE_02108	YggS family pyridoxal phosphate-dependent enzyme (Fragment)	-	Yes	+	modified_base
2126091	-	CDS	CAB3280174.1	CPFDLNE_02108	YggS family pyridoxal phosphate-dependent enzyme (Fragment)	-	No
2126144	-	CDS	CAB3280174.1	CPFDLNE_02108	YggS family pyridoxal phosphate-dependent enzyme (Fragment)	-	No
2153492	-	CDS	CAB3280200.1	OCPFDLNE_02134	Protoheme IX farnesyltransferase	ctaB2	Yes	+	modified_base
2153568	-	CDS	CAB3280200.1	OCPFDLNE_02134	Protoheme IX farnesyltransferase	ctaB2	Yes	+	modified_base
2153600	-	CDS	CAB3280200.1	OCPFDLNE_02134	Protoheme IX farnesyltransferase	ctaB2	No
2153620	-	intergenic region	-	-	-	-	No
2161052	-	CDS	CAB3280210.1	OCPFDLNE_02144	Choloylglycine hydrolase	cbh	No
2161091	-	CDS	CAB3280210.1	OCPFDLNE_02144	Choloylglycine hydrolase	cbh	No
2201316	+	CDS	CAB3280276.1	CPFDLNE_02210	hypothetical protein	-	No
2201394	+	CDS	CAB3280277.1	CPFDLNE_02211	hypothetical protein	-	Yes	+	modified_base
2201405	+	CDS	CAB3280277.1	CPFDLNE_02211	hypothetical protein	-	No
2201454	+	CDS	CAB3280277.1	CPFDLNE_02211	hypothetical protein	-	No
2201463	+	CDS	CAB3280277.1	CPFDLNE_02211	hypothetical protein	-	No
2201505	+	CDS	CAB3280277.1	CPFDLNE_02211	hypothetical protein	-	Yes	-	modified_base
2201521	+	CDS	CAB3280277.1	CPFDLNE_02211	hypothetical protein	-	No
2201538	+	CDS	CAB3280277.1	CPFDLNE_02211	hypothetical protein	-	No
2201566	+	CDS	CAB3280277.1	CPFDLNE_02211	hypothetical protein	-	No
2201613	+	CDS	CAB3280277.1	CPFDLNE_02211	hypothetical protein	-	No
2201638	+	CDS	CAB3280277.1	CPFDLNE_02211	hypothetical protein	-	No
2201650	+	CDS	CAB3280277.1	CPFDLNE_02211	hypothetical protein	-	No
2201664	+	CDS	CAB3280277.1	CPFDLNE_02211	hypothetical protein	-	Yes	-	modified_base
2201676	+	CDS	CAB3280277.1	CPFDLNE_02211	hypothetical protein	-	No
2239969	-	CDS	CAB3280318.1	OCPFDLNE_02253	Transcription antiterminator	licR_5	No
2240103	-	CDS	CAB3280318.1	OCPFDLNE_02253	Transcription antiterminator	licR_5	Yes	-	modified_base
2240205	-	CDS	CAB3280318.1	OCPFDLNE_02253	Transcription antiterminator	licR_5	No
2240250	-	CDS	CAB3280318.1	OCPFDLNE_02253	Transcription antiterminator	licR_5	No
2240685	-	CDS	CAB3280318.1	OCPFDLNE_02253	Transcription antiterminator	licR_5	No
2240731	-	CDS	CAB3280318.1	OCPFDLNE_02253	Transcription antiterminator	licR_5	Yes	-	modified_base
2240763	-	CDS	CAB3280318.1	OCPFDLNE_02253	Transcription antiterminator	licR_5	No
2240775	-	CDS	CAB3280318.1	OCPFDLNE_02253	Transcription antiterminator	licR_5	Yes	+	modified_base
2240803	-	CDS	CAB3280318.1	OCPFDLNE_02253	Transcription antiterminator	licR_5	Yes	+	modified_base
2240822	-	CDS	CAB3280318.1	OCPFDLNE_02253	Transcription antiterminator	licR_5	No
2240830	-	CDS	CAB3280318.1	OCPFDLNE_02253	Transcription antiterminator	licR_5	No
2240984	-	CDS	CAB3280318.1	OCPFDLNE_02253	Transcription antiterminator	licR_5	Yes	+	modified_base
2240994	-	CDS	CAB3280318.1	OCPFDLNE_02253	Transcription antiterminator	licR_5	Yes	+	modified_base
2241014	-	CDS	CAB3280318.1	OCPFDLNE_02253	Transcription antiterminator	licR_5	No
2241079	-	CDS	CAB3280318.1	OCPFDLNE_02253	Transcription antiterminator	licR_5	No
2241134	-	CDS	CAB3280318.1	OCPFDLNE_02253	Transcription antiterminator	licR_5	Yes	-	modified_base
2241166	-	CDS	CAB3280318.1	OCPFDLNE_02253	Transcription antiterminator	licR_5	Yes	-	modified_base
2241263	-	CDS	CAB3280318.1	OCPFDLNE_02253	Transcription antiterminator	licR_5	No
2241278	-	CDS	CAB3280318.1	OCPFDLNE_02253	Transcription antiterminator	licR_5	Yes	+	modified_base
2241353	-	CDS	CAB3280318.1	OCPFDLNE_02253	Transcription antiterminator	licR_5	No
2274239	-	CDS	CAB3280349.1	CPFDLNE_02284	hypothetical protein	-	No
2274393	-	CDS	CAB3280349.1	CPFDLNE_02284	hypothetical protein	-	No
2287898	+	intergenic region	-	-	-	-	Yes	-	modified_base
2287917	+	intergenic region	-	-	-	-	No
2287942	+	intergenic region	-	-	-	-	No
2288003	+	intergenic region	-	-	-	-	Yes	+	m6A
2288072	+	intergenic region	-	-	-	-	No
2288130	+	intergenic region	-	-	-	-	No
2288149	+	intergenic region	-	-	-	-	No
2288157	+	intergenic region	-	-	-	-	No
2288257	+	intergenic region	-	-	-	-	Yes	-	modified_base
2288271	+	intergenic region	-	-	-	-	No
2288280	+	intergenic region	-	-	-	-	Yes	-	modified_base
2288299	+	intergenic region	-	-	-	-	No
2300870	-	CDS	CAB3280375.1	OCPFDLNE_02315	Ribonucleotide-diphosphate reductase subunit alpha	nrdE	No
2301437	+	intergenic region	-	-	-	-	No
2301472	+	CDS	CAB3280376.1	CPFDLNE_02316	hypothetical protein	-	No
2301485	+	CDS	CAB3280376.1	CPFDLNE_02316	hypothetical protein	-	No
2301539	+	CDS	CAB3280376.1	CPFDLNE_02316	hypothetical protein	-	No
2301571	+	CDS	CAB3280376.1	CPFDLNE_02316	hypothetical protein	-	No
2301631	+	CDS	CAB3280376.1	CPFDLNE_02316	hypothetical protein	-	Yes	-	modified_base
2301699	+	CDS	CAB3280376.1	CPFDLNE_02316	hypothetical protein	-	No
2301712	+	CDS	CAB3280376.1	CPFDLNE_02316	hypothetical protein	-	Yes	+	modified_base
2301759	+	CDS	CAB3280376.1	CPFDLNE_02316	hypothetical protein	-	Yes	+	modified_base
2302899	-	CDS	CAB3280377.1	OCPFDLNE_02317	Putative alkyl/aryl-sulfatase YjcS	yjcS_2	No
2303089	-	CDS	CAB3280377.1	OCPFDLNE_02317	Putative alkyl/aryl-sulfatase YjcS	yjcS_2	No
2303411	-	CDS	CAB3280377.1	OCPFDLNE_02317	Putative alkyl/aryl-sulfatase YjcS	yjcS_2	No
2303468	-	CDS	CAB3280377.1	OCPFDLNE_02317	Putative alkyl/aryl-sulfatase YjcS	yjcS_2	Yes	-	modified_base
2303540	-	CDS	CAB3280377.1	OCPFDLNE_02317	Putative alkyl/aryl-sulfatase YjcS	yjcS_2	No
2303642	-	CDS	CAB3280377.1	OCPFDLNE_02317	Putative alkyl/aryl-sulfatase YjcS	yjcS_2	Yes	+	m4C
2303689	-	CDS	CAB3280377.1	OCPFDLNE_02317	Putative alkyl/aryl-sulfatase YjcS	yjcS_2	No
2303756	-	CDS	CAB3280377.1	OCPFDLNE_02317	Putative alkyl/aryl-sulfatase YjcS	yjcS_2	Yes	-	modified_base
2303872	-	CDS	CAB3280378.1	CPFDLNE_02318	General stress response protein CsbD	-	Yes	-	m6A
2303911	-	CDS	CAB3280378.1	CPFDLNE_02318	General stress response protein CsbD	-	Yes	+	modified_base
2303937	-	CDS	CAB3280378.1	CPFDLNE_02318	General stress response protein CsbD	-	Yes	-	modified_base
2303950	-	CDS	CAB3280378.1	CPFDLNE_02318	General stress response protein CsbD	-	No
2303963	-	CDS	CAB3280378.1	CPFDLNE_02318	General stress response protein CsbD	-	No
2303979	-	CDS	CAB3280378.1	CPFDLNE_02318	General stress response protein CsbD	-	Yes	-	modified_base
2304011	-	CDS	CAB3280378.1	CPFDLNE_02318	General stress response protein CsbD	-	No
2304026	-	CDS	CAB3280378.1	CPFDLNE_02318	General stress response protein CsbD	-	Yes	-	modified_base
2304037	-	CDS	CAB3280378.1	CPFDLNE_02318	General stress response protein CsbD	-	Yes	-	modified_base
2304047	-	CDS	CAB3280378.1	CPFDLNE_02318	General stress response protein CsbD	-	Yes	+	modified_base
2304070	-	intergenic region	-	-	-	-	No
2340751	-	CDS	CAB3280410.1	OCPFDLNE_02350	Adapter protein MecA	mecA	No
2340759	-	CDS	CAB3280410.1	OCPFDLNE_02350	Adapter protein MecA	mecA	Yes	+	modified_base
2340782	-	CDS	CAB3280410.1	OCPFDLNE_02350	Adapter protein MecA	mecA	Yes	+	modified_base
2340911	-	CDS	CAB3280410.1	OCPFDLNE_02350	Adapter protein MecA	mecA	No
2340961	-	CDS	CAB3280410.1	OCPFDLNE_02350	Adapter protein MecA	mecA	No
2341050	-	intergenic region	-	-	-	-	No
2341069	-	intergenic region	-	-	-	-	No
2341272	-	intergenic region	-	-	-	-	Yes	-	modified_base
2341352	-	CDS	CAB3280411.1	OCPFDLNE_02351	Transcriptional regulator Spx	spxA	No
2341383	-	CDS	CAB3280411.1	OCPFDLNE_02351	Transcriptional regulator Spx	spxA	Yes	+	modified_base
2341402	-	CDS	CAB3280411.1	OCPFDLNE_02351	Transcriptional regulator Spx	spxA	No
2341460	-	CDS	CAB3280411.1	OCPFDLNE_02351	Transcriptional regulator Spx	spxA	No
2341470	-	CDS	CAB3280411.1	OCPFDLNE_02351	Transcriptional regulator Spx	spxA	Yes	-	modified_base
2341521	-	CDS	CAB3280411.1	OCPFDLNE_02351	Transcriptional regulator Spx	spxA	No
2341556	-	CDS	CAB3280411.1	OCPFDLNE_02351	Transcriptional regulator Spx	spxA	No
2341573	-	CDS	CAB3280411.1	OCPFDLNE_02351	Transcriptional regulator Spx	spxA	No
2341603	-	CDS	CAB3280411.1	OCPFDLNE_02351	Transcriptional regulator Spx	spxA	No
2341612	-	CDS	CAB3280411.1	OCPFDLNE_02351	Transcriptional regulator Spx	spxA	Yes	+	modified_base
2341650	-	CDS	CAB3280411.1	OCPFDLNE_02351	Transcriptional regulator Spx	spxA	No
2341693	-	intergenic region	-	-	-	-	No
2341701	-	intergenic region	-	-	-	-	Yes	+	modified_base
2341767	-	intergenic region	-	-	-	-	Yes	-	modified_base
2341824	-	intergenic region	-	-	-	-	Yes	-	modified_base
2351152	-	CDS	CAB3280420.1	OCPFDLNE_02360	Organic hydroperoxide resistance transcriptional regulator	ohrR_2	Yes	-	modified_base
2355555	-	CDS	CAB3280425.1	OCPFDLNE_02365	2	gpmA_6	No
2355628	-	CDS	CAB3280425.1	OCPFDLNE_02365	2	gpmA_6	No
2355641	-	CDS	CAB3280425.1	OCPFDLNE_02365	2	gpmA_6	No
2355699	-	CDS	CAB3280425.1	OCPFDLNE_02365	2	gpmA_6	No
2355731	-	CDS	CAB3280425.1	OCPFDLNE_02365	2	gpmA_6	No
2355762	-	CDS	CAB3280425.1	OCPFDLNE_02365	2	gpmA_6	No
2355836	-	CDS	CAB3280425.1	OCPFDLNE_02365	2	gpmA_6	Yes	-	modified_base
2355877	-	CDS	CAB3280425.1	OCPFDLNE_02365	2	gpmA_6	No
2355970	-	CDS	CAB3280425.1	OCPFDLNE_02365	2	gpmA_6	Yes	+	m4C
2356068	-	CDS	CAB3280425.1	OCPFDLNE_02365	2	gpmA_6	Yes	-	modified_base
2356159	-	CDS	CAB3280425.1	OCPFDLNE_02365	2	gpmA_6	No
2356216	-	CDS	CAB3280425.1	OCPFDLNE_02365	2	gpmA_6	No
2356224	-	intergenic region	-	-	-	-	Yes	-	modified_base
2359389	-	CDS	CAB3280427.1	OCPFDLNE_02367	YetJ	yetJ	Yes	-	modified_base
2359412	-	CDS	CAB3280427.1	OCPFDLNE_02367	YetJ	yetJ	Yes	-	modified_base
2359462	-	CDS	CAB3280427.1	OCPFDLNE_02367	YetJ	yetJ	No
2359520	-	CDS	CAB3280427.1	OCPFDLNE_02367	YetJ	yetJ	Yes	-	modified_base
2359561	-	CDS	CAB3280427.1	OCPFDLNE_02367	YetJ	yetJ	No
2359602	-	CDS	CAB3280427.1	OCPFDLNE_02367	YetJ	yetJ	No
2359704	-	CDS	CAB3280427.1	OCPFDLNE_02367	YetJ	yetJ	No
2361647	-	CDS	CAB3280430.1	CPFDLNE_02370	hypothetical protein	-	No
2361791	-	CDS	CAB3280430.1	CPFDLNE_02370	hypothetical protein	-	No
2361864	-	CDS	CAB3280430.1	CPFDLNE_02370	hypothetical protein	-	No
2364502	+	CDS	CAB3280433.1	OCPFDLNE_02373	Heme-degrading monooxygenase HmoB	hmoB	Yes	-	modified_base
2364572	+	CDS	CAB3280433.1	OCPFDLNE_02373	Heme-degrading monooxygenase HmoB	hmoB	No
2368620	+	CDS	CAB3280439.1	OCPFDLNE_02379	Foldase protein PrsA	prsA1_2	Yes	+	modified_base
2368646	+	CDS	CAB3280439.1	OCPFDLNE_02379	Foldase protein PrsA	prsA1_2	No
2368786	+	CDS	CAB3280439.1	OCPFDLNE_02379	Foldase protein PrsA	prsA1_2	No
2368802	+	CDS	CAB3280439.1	OCPFDLNE_02379	Foldase protein PrsA	prsA1_2	No
2368891	+	CDS	CAB3280439.1	OCPFDLNE_02379	Foldase protein PrsA	prsA1_2	Yes	-	modified_base
2368905	+	CDS	CAB3280439.1	OCPFDLNE_02379	Foldase protein PrsA	prsA1_2	No
2369025	+	CDS	CAB3280439.1	OCPFDLNE_02379	Foldase protein PrsA	prsA1_2	No
2382104	+	intergenic region	-	-	-	-	No
2382204	+	CDS	CAB3280450.1	OCPFDLNE_02390	Arsenate reductase	arsC_1	Yes	-	m4C
2382214	+	CDS	CAB3280450.1	OCPFDLNE_02390	Arsenate reductase	arsC_1	No
2382226	+	CDS	CAB3280450.1	OCPFDLNE_02390	Arsenate reductase	arsC_1	No
2382344	+	CDS	CAB3280450.1	OCPFDLNE_02390	Arsenate reductase	arsC_1	Yes	+	modified_base
2382388	+	CDS	CAB3280450.1	OCPFDLNE_02390	Arsenate reductase	arsC_1	No
2382482	+	CDS	CAB3280450.1	OCPFDLNE_02390	Arsenate reductase	arsC_1	Yes	-	modified_base
2382585	+	CDS	CAB3280450.1	OCPFDLNE_02390	Arsenate reductase	arsC_1	No
2382596	+	intergenic region	-	-	-	-	No
2382604	+	intergenic region	-	-	-	-	No
2407469	-	CDS	CAB3280476.1	OCPFDLNE_02416	Intracellular proteinase	yraA	No
2407488	-	CDS	CAB3280476.1	OCPFDLNE_02416	Intracellular proteinase	yraA	No
2407514	-	CDS	CAB3280476.1	OCPFDLNE_02416	Intracellular proteinase	yraA	Yes	-	modified_base
2407555	-	CDS	CAB3280476.1	OCPFDLNE_02416	Intracellular proteinase	yraA	No
2407632	-	CDS	CAB3280476.1	OCPFDLNE_02416	Intracellular proteinase	yraA	Yes	+	modified_base
2407691	-	CDS	CAB3280476.1	OCPFDLNE_02416	Intracellular proteinase	yraA	Yes	-	modified_base
2407959	-	intergenic region	-	-	-	-	No
2408052	-	intergenic region	-	-	-	-	No
2408066	-	intergenic region	-	-	-	-	Yes	-	modified_base
2408115	-	intergenic region	-	-	-	-	No
2421777	-	CDS	CAB3280488.1	CPFDLNE_02428	YhzC	-	No
2421792	-	CDS	CAB3280488.1	CPFDLNE_02428	YhzC	-	No
2421879	-	CDS	CAB3280488.1	CPFDLNE_02428	YhzC	-	No
2421893	-	CDS	CAB3280488.1	CPFDLNE_02428	YhzC	-	Yes	-	modified_base
2421907	-	CDS	CAB3280488.1	CPFDLNE_02428	YhzC	-	No
2422001	-	intergenic region	-	-	-	-	No
2422029	-	intergenic region	-	-	-	-	Yes	-	modified_base
2422046	-	intergenic region	-	-	-	-	Yes	-	modified_base
2422111	-	intergenic region	-	-	-	-	No
2422262	-	CDS	CAB3280489.1	OCPFDLNE_02429	Genetic competence transcription factor	comK	Yes	+	modified_base
2422903	-	CDS	CAB3280490.1	OCPFDLNE_02430	HTH-type transcriptional regulator Xre	xre_2	No
2422994	-	CDS	CAB3280490.1	OCPFDLNE_02430	HTH-type transcriptional regulator Xre	xre_2	Yes	-	m4C
2423008	-	CDS	CAB3280490.1	OCPFDLNE_02430	HTH-type transcriptional regulator Xre	xre_2	Yes	-	m6A
2423025	-	CDS	CAB3280490.1	OCPFDLNE_02430	HTH-type transcriptional regulator Xre	xre_2	No
2423041	-	CDS	CAB3280490.1	OCPFDLNE_02430	HTH-type transcriptional regulator Xre	xre_2	No
2423166	-	CDS	CAB3280490.1	OCPFDLNE_02430	HTH-type transcriptional regulator Xre	xre_2	Yes	-	modified_base
2446528	-	CDS	CAB3280514.1	OCPFDLNE_02454	Glucosamine-6-phosphate deaminase	nagB_3	No
2446662	-	CDS	CAB3280514.1	OCPFDLNE_02454	Glucosamine-6-phosphate deaminase	nagB_3	Yes	-	m4C
2446689	-	CDS	CAB3280514.1	OCPFDLNE_02454	Glucosamine-6-phosphate deaminase	nagB_3	No
2446746	-	CDS	CAB3280514.1	OCPFDLNE_02454	Glucosamine-6-phosphate deaminase	nagB_3	Yes	-	modified_base
2446757	-	CDS	CAB3280514.1	OCPFDLNE_02454	Glucosamine-6-phosphate deaminase	nagB_3	No
2446768	-	CDS	CAB3280514.1	OCPFDLNE_02454	Glucosamine-6-phosphate deaminase	nagB_3	No
2446804	-	CDS	CAB3280514.1	OCPFDLNE_02454	Glucosamine-6-phosphate deaminase	nagB_3	Yes	+	modified_base
2446825	-	CDS	CAB3280514.1	OCPFDLNE_02454	Glucosamine-6-phosphate deaminase	nagB_3	No
2446861	-	CDS	CAB3280514.1	OCPFDLNE_02454	Glucosamine-6-phosphate deaminase	nagB_3	Yes	-	modified_base
2446914	-	CDS	CAB3280514.1	OCPFDLNE_02454	Glucosamine-6-phosphate deaminase	nagB_3	No
2457786	-	rRNA		OCPFDLNE_02475	5S ribosomal RNA	-	No
2457938	-	intergenic region	-	-	-	-	No
2457972	-	rRNA		OCPFDLNE_02476	23S ribosomal RNA	-	Yes	-	m4C
2457984	-	rRNA		OCPFDLNE_02476	23S ribosomal RNA	-	No
2457995	-	rRNA		OCPFDLNE_02476	23S ribosomal RNA	-	No
2458006	-	rRNA		OCPFDLNE_02476	23S ribosomal RNA	-	No
2458017	-	rRNA		OCPFDLNE_02476	23S ribosomal RNA	-	Yes	-	modified_base
2458030	-	rRNA		OCPFDLNE_02476	23S ribosomal RNA	-	No
2458040	-	rRNA		OCPFDLNE_02476	23S ribosomal RNA	-	Yes	-	modified_base
2458063	-	rRNA		OCPFDLNE_02476	23S ribosomal RNA	-	No
2458074	-	rRNA		OCPFDLNE_02476	23S ribosomal RNA	-	No
2458091	-	rRNA		OCPFDLNE_02476	23S ribosomal RNA	-	Yes	-	modified_base
2458132	-	rRNA		OCPFDLNE_02476	23S ribosomal RNA	-	Yes	-	modified_base
2458166	-	rRNA		OCPFDLNE_02476	23S ribosomal RNA	-	Yes	-	modified_base
2458203	-	rRNA		OCPFDLNE_02476	23S ribosomal RNA	-	No
2458239	-	rRNA		OCPFDLNE_02476	23S ribosomal RNA	-	No
2458247	-	rRNA		OCPFDLNE_02476	23S ribosomal RNA	-	Yes	-	modified_base
2458268	-	rRNA		OCPFDLNE_02476	23S ribosomal RNA	-	Yes	+	modified_base
2458302	-	rRNA		OCPFDLNE_02476	23S ribosomal RNA	-	No
2458334	-	rRNA		OCPFDLNE_02476	23S ribosomal RNA	-	No
2458347	-	rRNA		OCPFDLNE_02476	23S ribosomal RNA	-	No
2458356	-	rRNA		OCPFDLNE_02476	23S ribosomal RNA	-	No
2458390	-	rRNA		OCPFDLNE_02476	23S ribosomal RNA	-	No
2458401	-	rRNA		OCPFDLNE_02476	23S ribosomal RNA	-	No
2458410	-	rRNA		OCPFDLNE_02476	23S ribosomal RNA	-	Yes	-	modified_base
2458428	-	rRNA		OCPFDLNE_02476	23S ribosomal RNA	-	No
2458464	-	rRNA		OCPFDLNE_02476	23S ribosomal RNA	-	Yes	-	m4C
2458538	-	rRNA		OCPFDLNE_02476	23S ribosomal RNA	-	No
2458566	-	rRNA		OCPFDLNE_02476	23S ribosomal RNA	-	No
2458587	-	rRNA		OCPFDLNE_02476	23S ribosomal RNA	-	Yes	+	m4C
2458597	-	rRNA		OCPFDLNE_02476	23S ribosomal RNA	-	No
2458615	-	rRNA		OCPFDLNE_02476	23S ribosomal RNA	-	No
2458668	-	rRNA		OCPFDLNE_02476	23S ribosomal RNA	-	No
2458681	-	rRNA		OCPFDLNE_02476	23S ribosomal RNA	-	Yes	-	modified_base
2458725	-	rRNA		OCPFDLNE_02476	23S ribosomal RNA	-	No
2458753	-	rRNA		OCPFDLNE_02476	23S ribosomal RNA	-	No
2458782	-	rRNA		OCPFDLNE_02476	23S ribosomal RNA	-	No
2458803	-	rRNA		OCPFDLNE_02476	23S ribosomal RNA	-	Yes	-	modified_base
2458858	-	rRNA		OCPFDLNE_02476	23S ribosomal RNA	-	No
2458869	-	rRNA		OCPFDLNE_02476	23S ribosomal RNA	-	No
2458886	-	rRNA		OCPFDLNE_02476	23S ribosomal RNA	-	No
2458919	-	rRNA		OCPFDLNE_02476	23S ribosomal RNA	-	Yes	+	modified_base
2458929	-	rRNA		OCPFDLNE_02476	23S ribosomal RNA	-	No
2458942	-	rRNA		OCPFDLNE_02476	23S ribosomal RNA	-	Yes	+	modified_base
2458979	-	rRNA		OCPFDLNE_02476	23S ribosomal RNA	-	No
2459007	-	rRNA		OCPFDLNE_02476	23S ribosomal RNA	-	Yes	+	m4C
2459021	-	rRNA		OCPFDLNE_02476	23S ribosomal RNA	-	No
2459103	-	rRNA		OCPFDLNE_02476	23S ribosomal RNA	-	Yes	-	modified_base
2459176	-	rRNA		OCPFDLNE_02476	23S ribosomal RNA	-	No
2459186	-	rRNA		OCPFDLNE_02476	23S ribosomal RNA	-	No
2459198	-	rRNA		OCPFDLNE_02476	23S ribosomal RNA	-	No
2459235	-	rRNA		OCPFDLNE_02476	23S ribosomal RNA	-	Yes	-	modified_base
2459250	-	rRNA		OCPFDLNE_02476	23S ribosomal RNA	-	No
2459277	-	rRNA		OCPFDLNE_02476	23S ribosomal RNA	-	No
2459298	-	rRNA		OCPFDLNE_02476	23S ribosomal RNA	-	Yes	+	modified_base
2459307	-	rRNA		OCPFDLNE_02476	23S ribosomal RNA	-	No
2459335	-	rRNA		OCPFDLNE_02476	23S ribosomal RNA	-	No
2459357	-	rRNA		OCPFDLNE_02476	23S ribosomal RNA	-	Yes	+	modified_base
2459384	-	rRNA		OCPFDLNE_02476	23S ribosomal RNA	-	No
2459402	-	rRNA		OCPFDLNE_02476	23S ribosomal RNA	-	No
2459439	-	rRNA		OCPFDLNE_02476	23S ribosomal RNA	-	Yes	-	modified_base
2459447	-	rRNA		OCPFDLNE_02476	23S ribosomal RNA	-	Yes	-	modified_base
2459461	-	rRNA		OCPFDLNE_02476	23S ribosomal RNA	-	Yes	-	modified_base
2459545	-	rRNA		OCPFDLNE_02476	23S ribosomal RNA	-	No
2459556	-	rRNA		OCPFDLNE_02476	23S ribosomal RNA	-	Yes	-	m4C
2459581	-	rRNA		OCPFDLNE_02476	23S ribosomal RNA	-	Yes	-	modified_base
2459589	-	rRNA		OCPFDLNE_02476	23S ribosomal RNA	-	No
2459602	-	rRNA		OCPFDLNE_02476	23S ribosomal RNA	-	Yes	-	modified_base
2459629	-	rRNA		OCPFDLNE_02476	23S ribosomal RNA	-	Yes	+	modified_base
2459649	-	rRNA		OCPFDLNE_02476	23S ribosomal RNA	-	No
2459661	-	rRNA		OCPFDLNE_02476	23S ribosomal RNA	-	Yes	+	modified_base
2459697	-	rRNA		OCPFDLNE_02476	23S ribosomal RNA	-	No
2459735	-	rRNA		OCPFDLNE_02476	23S ribosomal RNA	-	Yes	-	modified_base
2459757	-	rRNA		OCPFDLNE_02476	23S ribosomal RNA	-	No
2459766	-	rRNA		OCPFDLNE_02476	23S ribosomal RNA	-	No
2459827	-	rRNA		OCPFDLNE_02476	23S ribosomal RNA	-	No
2459837	-	rRNA		OCPFDLNE_02476	23S ribosomal RNA	-	No
2459864	-	rRNA		OCPFDLNE_02476	23S ribosomal RNA	-	No
2459884	-	rRNA		OCPFDLNE_02476	23S ribosomal RNA	-	No
2459917	-	rRNA		OCPFDLNE_02476	23S ribosomal RNA	-	No
2459958	-	rRNA		OCPFDLNE_02476	23S ribosomal RNA	-	No
[truncated: 657 more rows]

## Sheet: R312_modifications_circ_phage
Position	RNA_mod_strand	feature	Protein ID	Locus Tag	Product	gene name	DNA_mod_seen	DNA_mod_strand
34545	-	intergenic region					No
34651	-	CDS	CAB3281195.1	CPFDLNE_03164	hypothetical protein		No
34733	-	CDS	CAB3281195.1	CPFDLNE_03164	hypothetical protein		No
34757	-	CDS	CAB3281195.1	CPFDLNE_03164	hypothetical protein		No
34791	-	CDS	CAB3281196.1	CPFDLNE_03165	hypothetical protein		No
34809	-	CDS	CAB3281196.1	CPFDLNE_03165	hypothetical protein		No
34887	-	CDS	CAB3281196.1	CPFDLNE_03165	hypothetical protein		No
34898	-	CDS	CAB3281196.1	CPFDLNE_03165	hypothetical protein		No
34959	-	CDS	CAB3281196.1	CPFDLNE_03165	hypothetical protein		No
34992	-	CDS	CAB3281196.1	CPFDLNE_03165	hypothetical protein		No
