# Supplementary material for: RNA editing, RNA modifications, and transcriptional units in Listeria monocytogenes
Source: Research Square preprint supplement (doi:10.21203/rs.3.rs-1530110/v1), 2022-04-21

**Figure S3. Visualization of antisense TSS prediction sites verified previously in**

**EGD-e: A) anti1255 and B) anti0605.** Figure shows two rows of reads data, in descending order: combined RNA-seq Illumina reads and combined cap-seq reads. Red lines are forward reads, and blue lines are reverse reads. Reads are sorted by strand. Below reads, annotation rows are shown in order of Genbank gene annotation, ANNOgesic TSS prediction in RO15, EGD-e TSSs lifted to RO15 genome, and ANNOgesic sRNA prediction. Green arrow represents TSSs.

A)

Combined RNA-seq

Combined Cap-seq

Annotation

RO15 TSSs

EGD-e lifted TSSs  
and asRNAs

Annogestic sRNA  
prediction

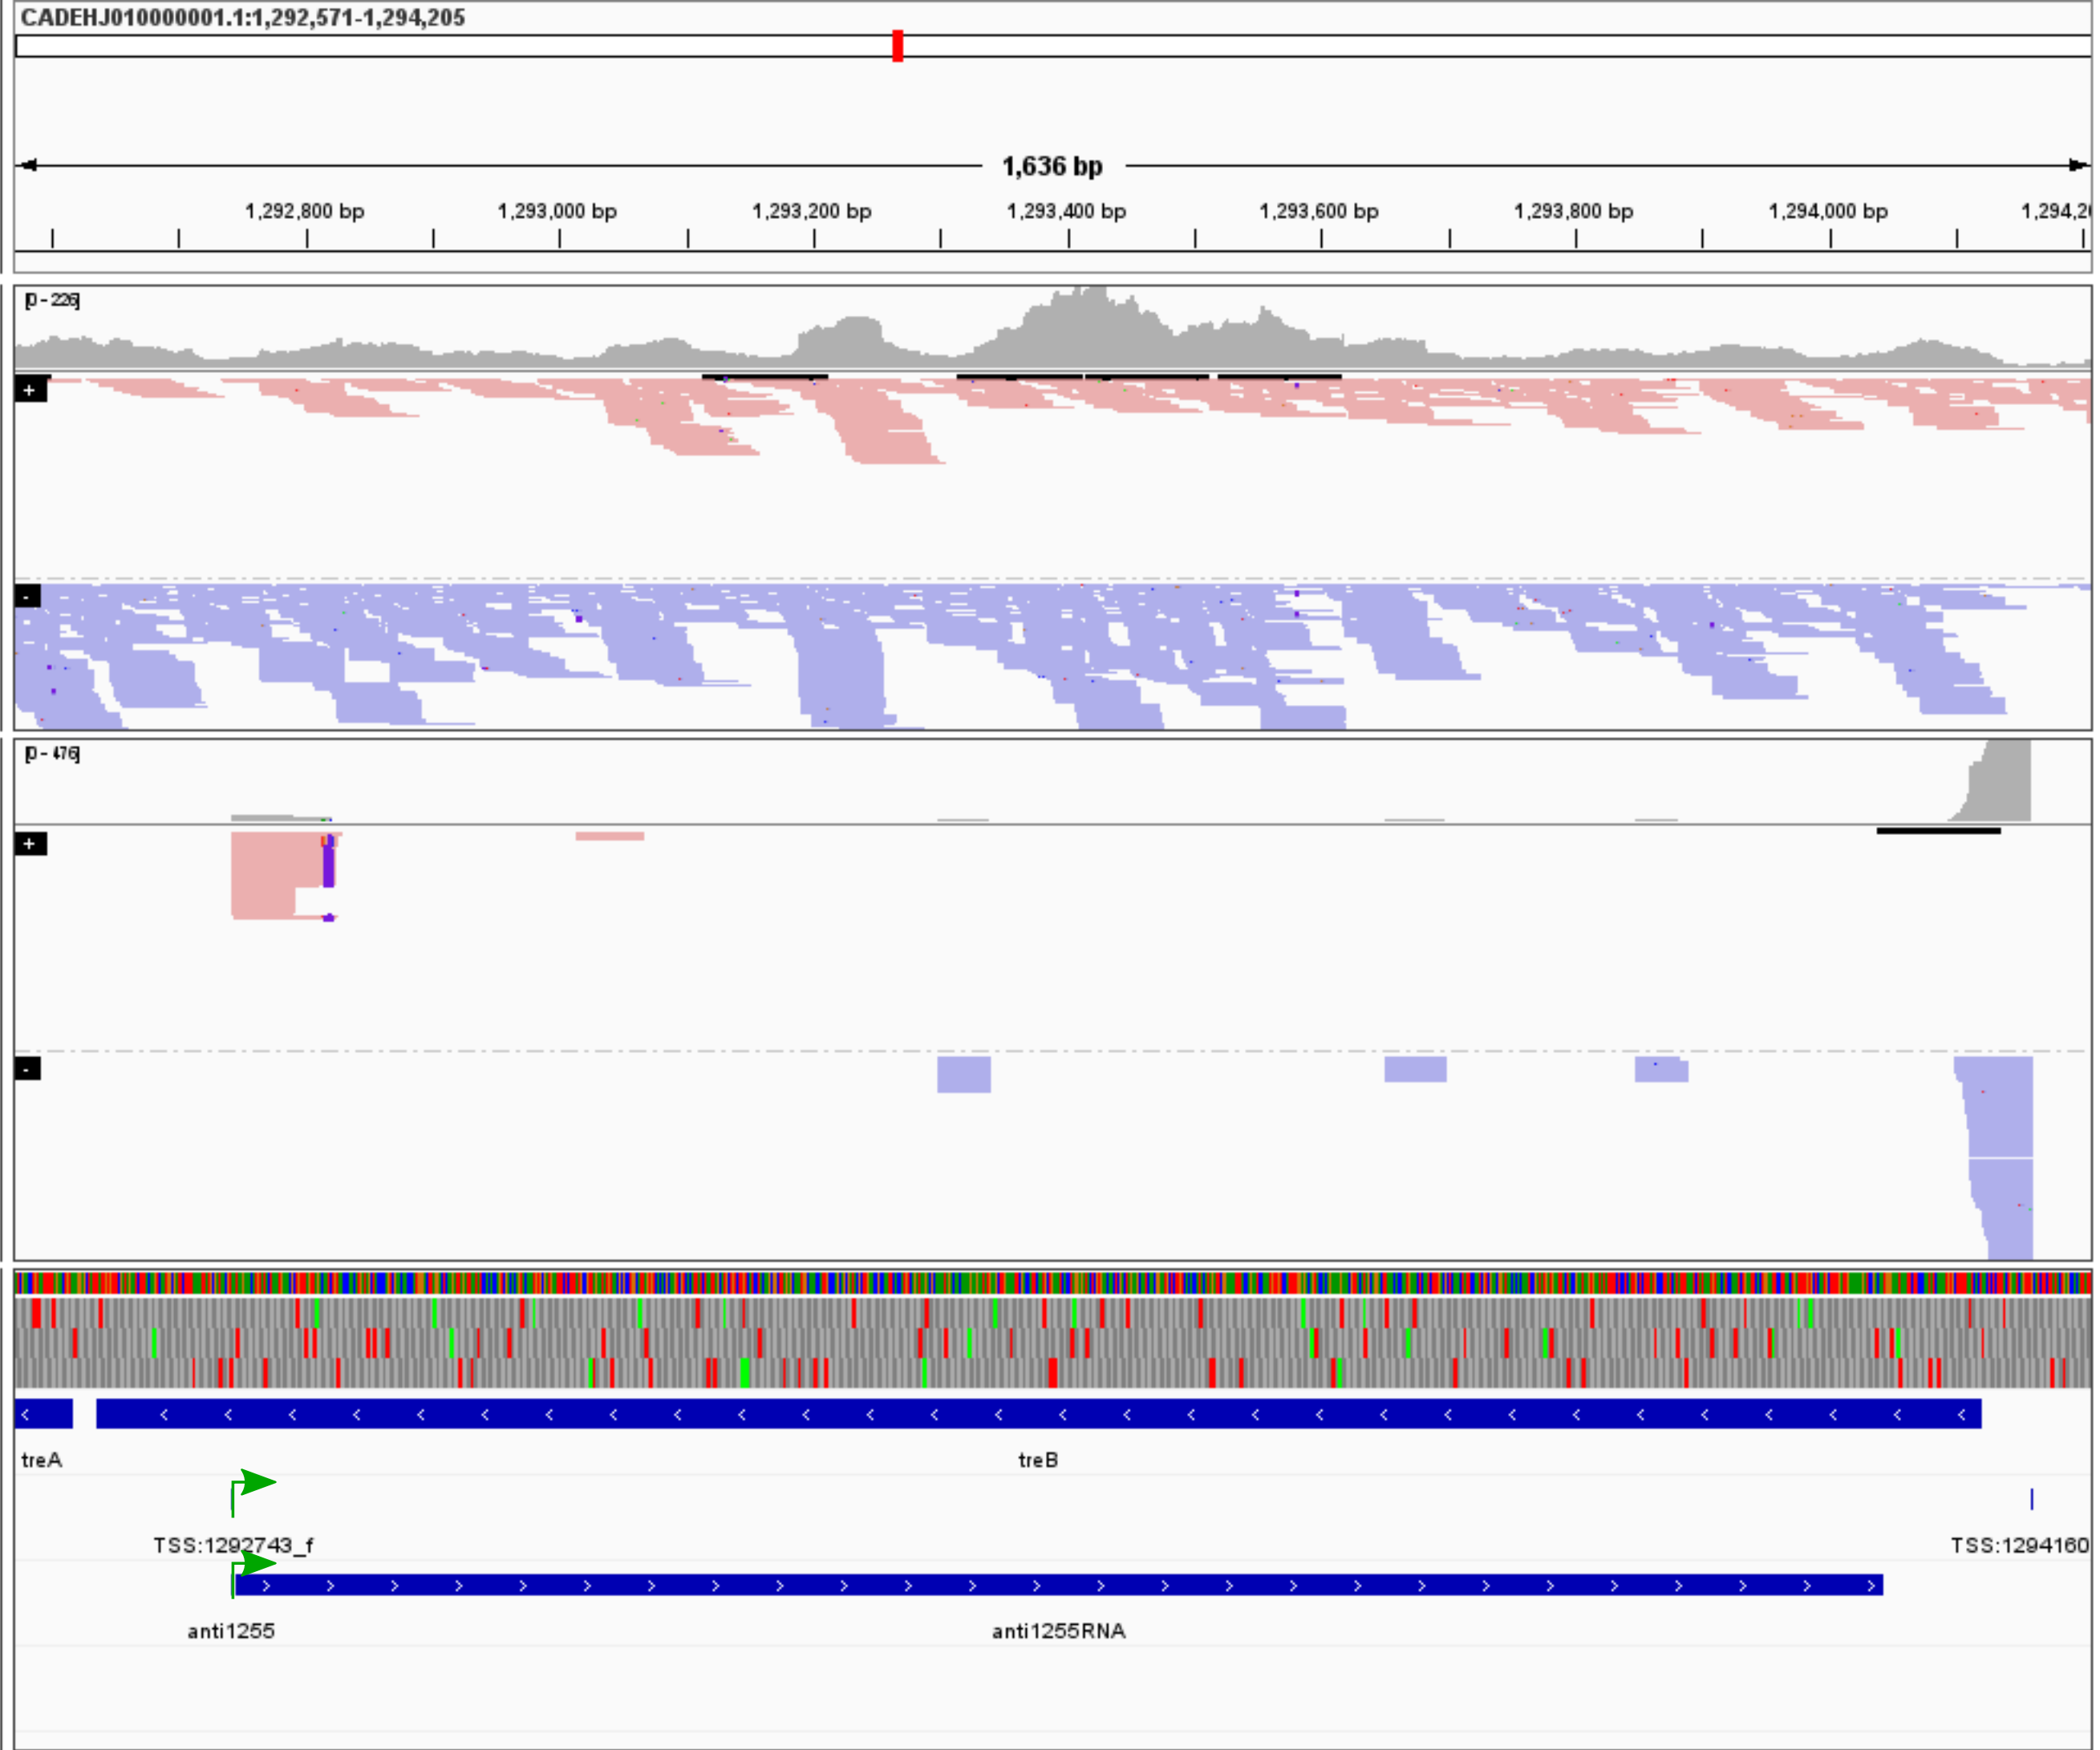

B)

Combined RNA-seq

Combined Cap-seq

Annotation

RO15 TSSs

EGD-e lifted TSSs  
and asRNAs  
Annogesic sRNA  
prediction

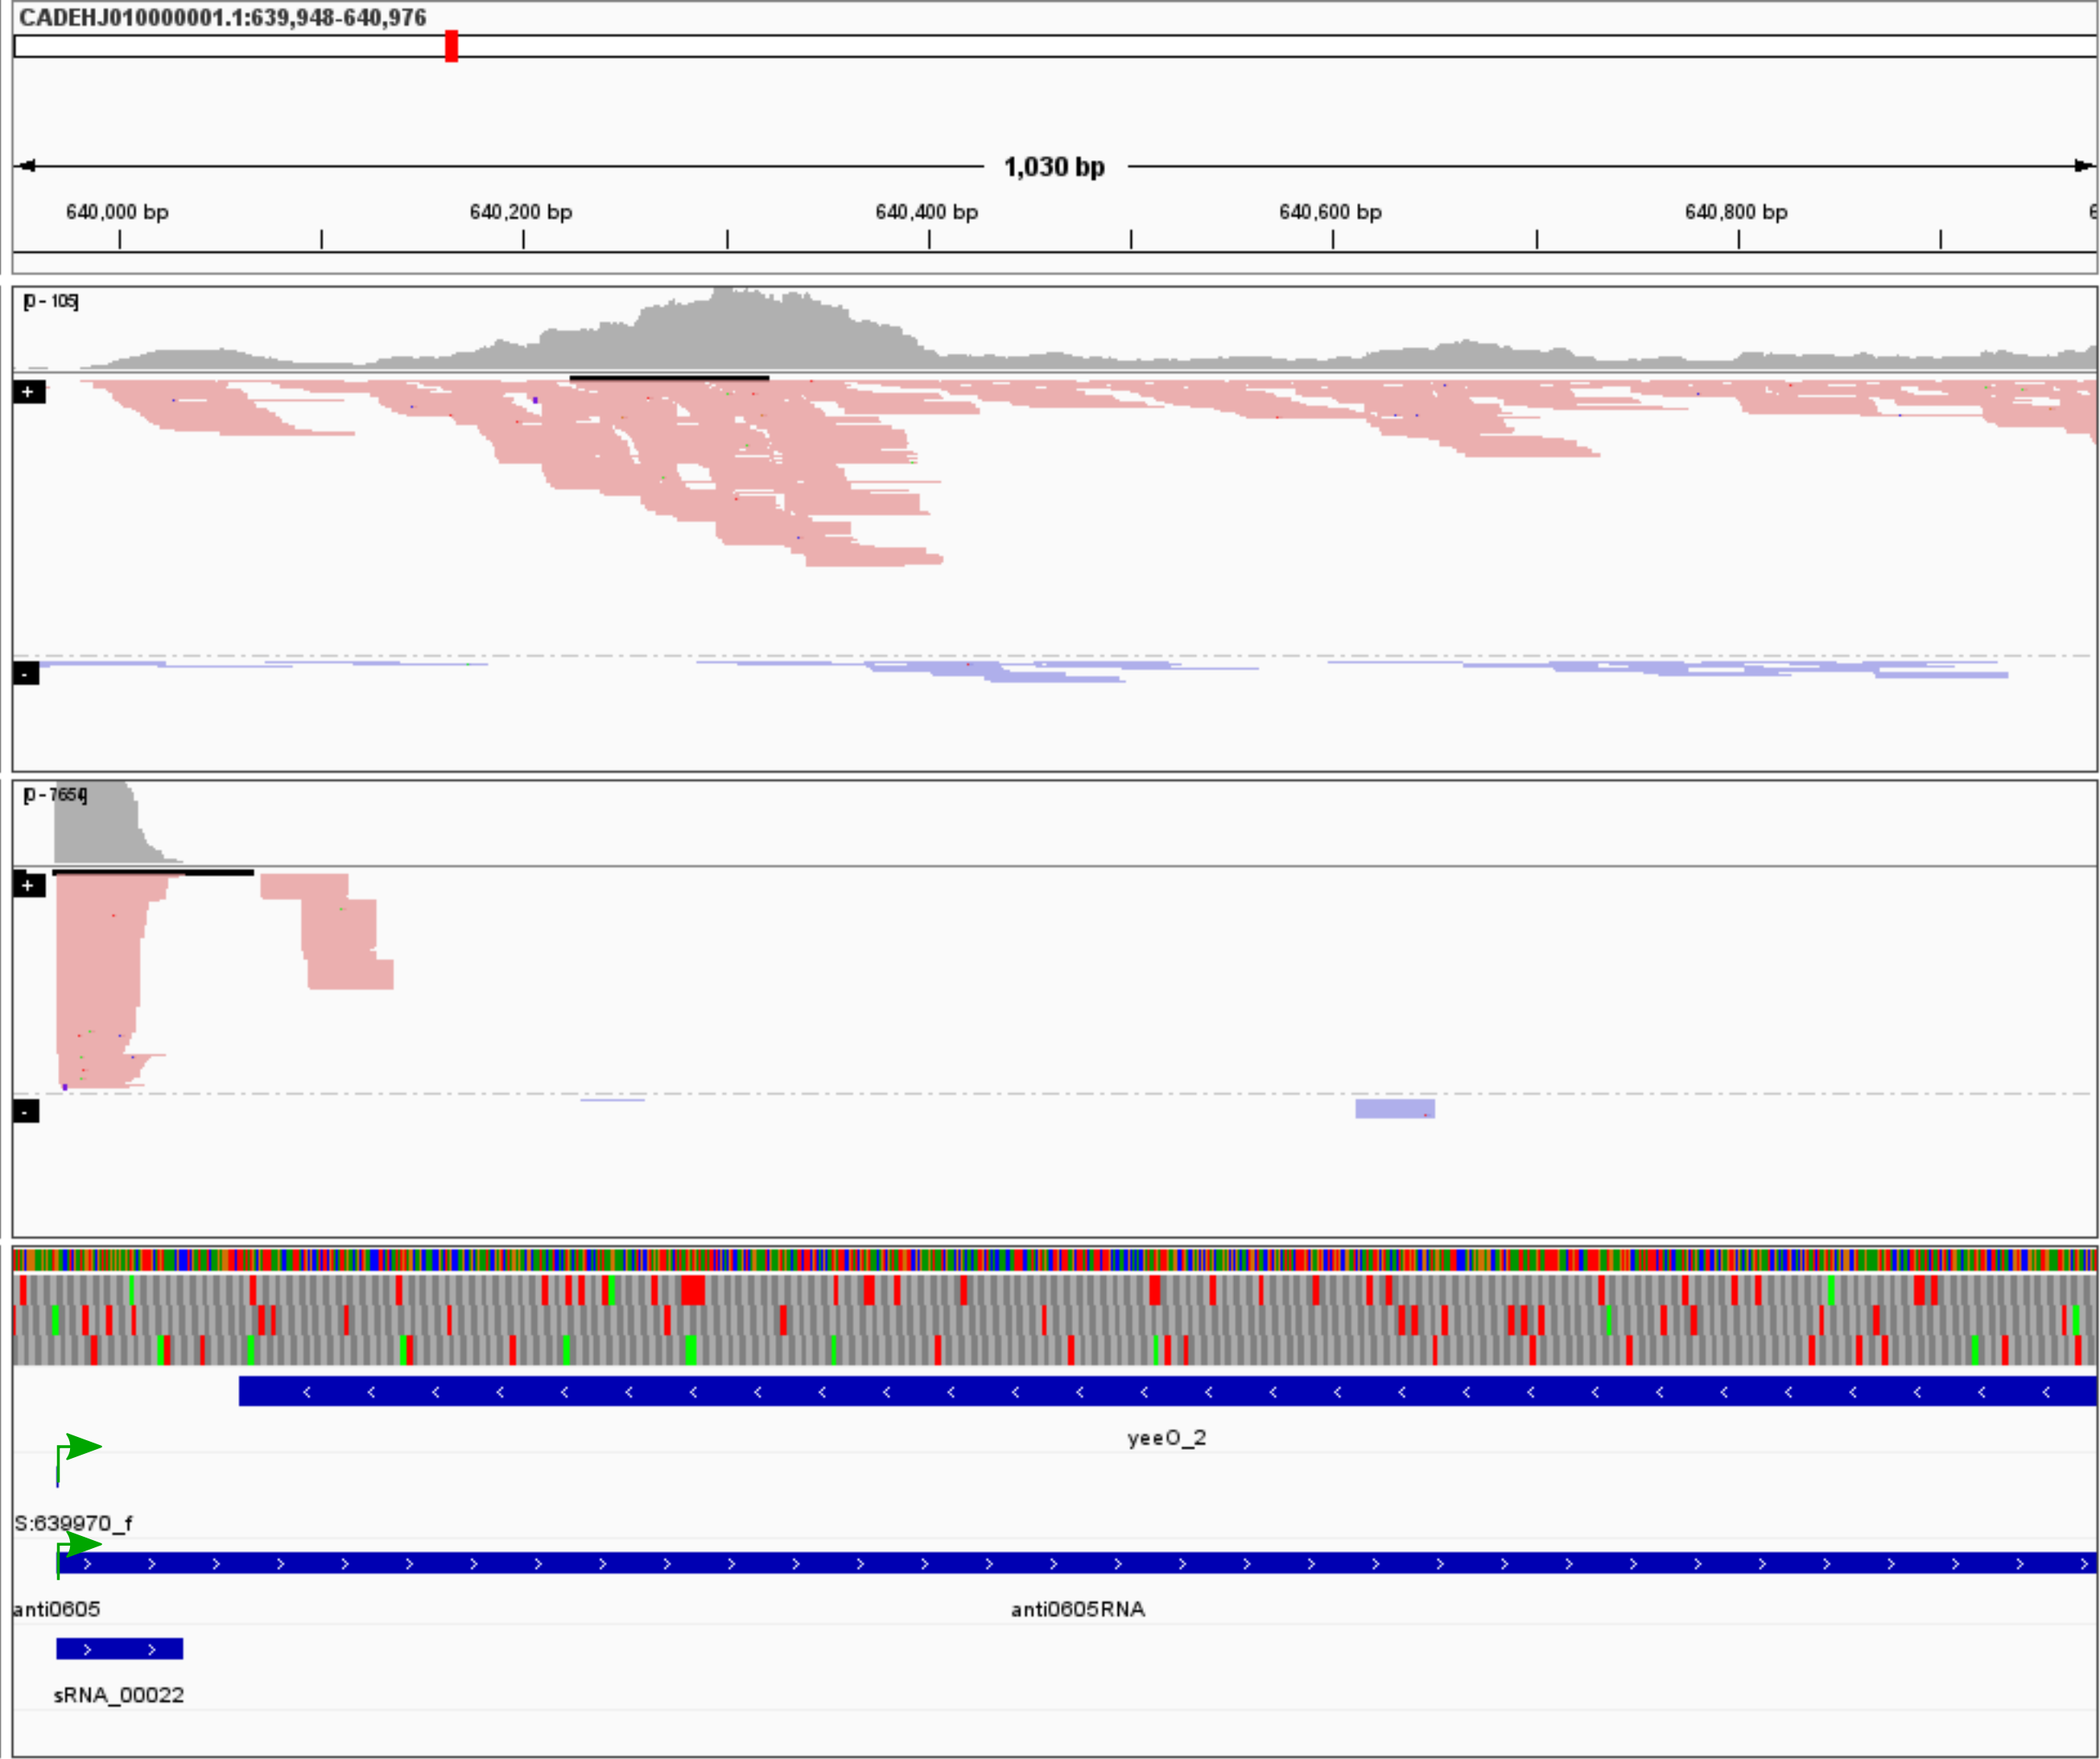

Supplement: Supplementary file 2 [file 6ccd9ce2b182b23c6816604f.pdf]
