# Supplementary material for: RNA editing, RNA modifications, and transcriptional units in Listeria monocytogenes
Source: Research Square preprint supplement (doi:10.21203/rs.3.rs-1530110/v1), 2022-04-21

**Figure S4. 5' UTR length distribution: a) only primary TSSs used and b) both primary and secondary TSSs used.**

## a) 5' UTR lengths using only primary TSSs

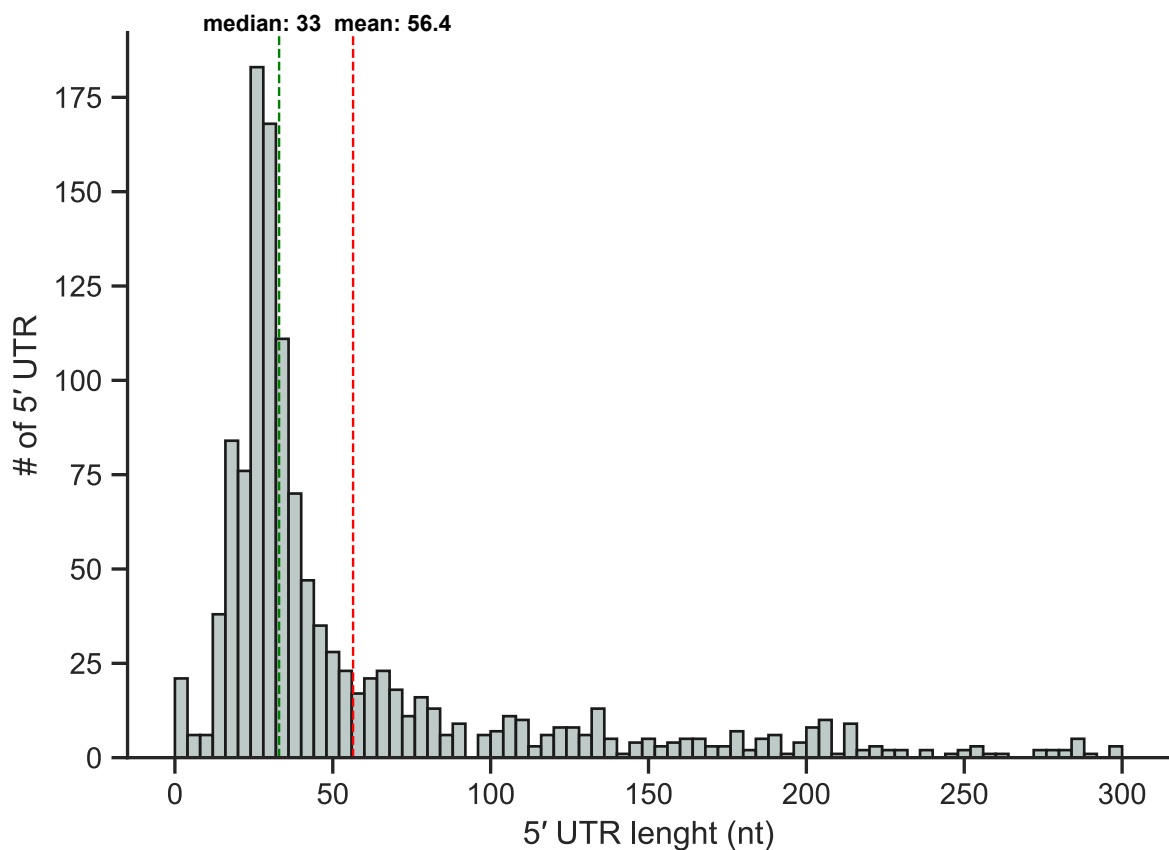

## b) 5' UTR lengths using only both primary and secondary TSSs

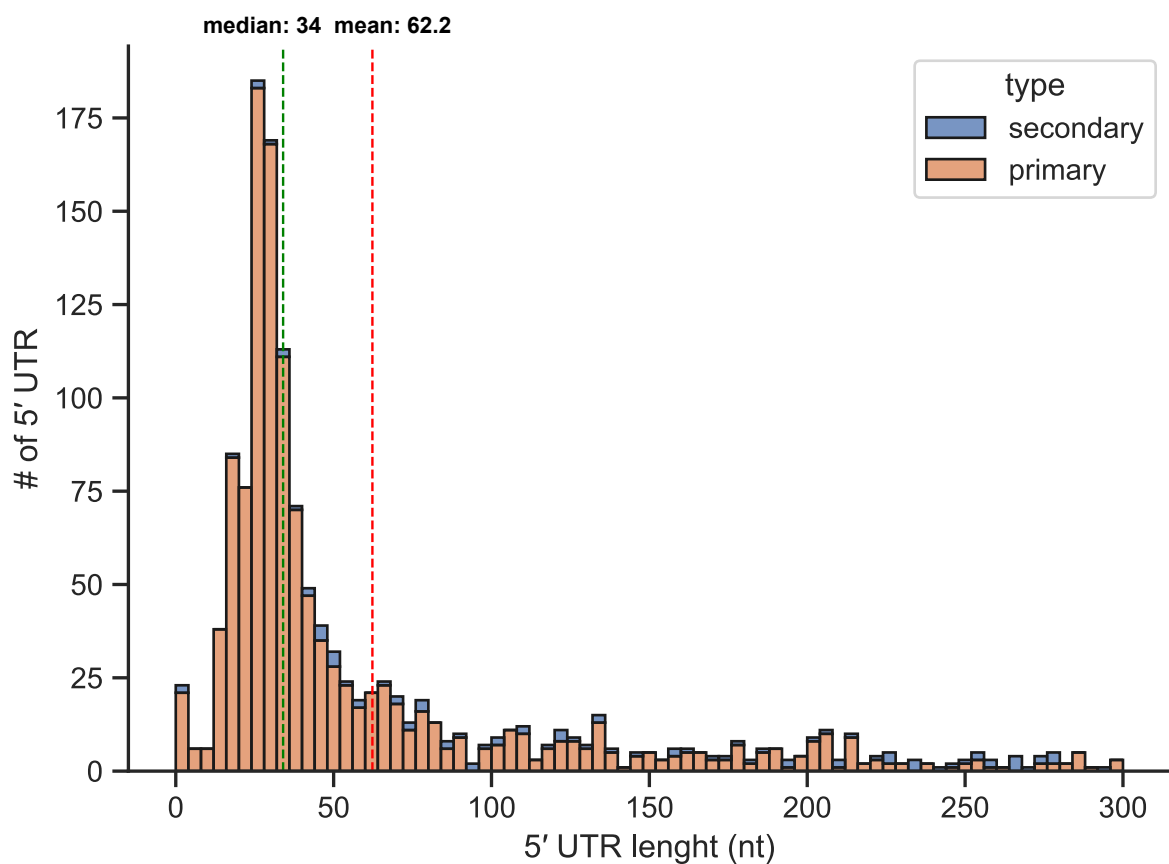

Supplement: Supplementary file 3 [file 727d71cf9e2f73291d500dae.pdf]
