# Supplementary material for: RNA editing, RNA modifications, and transcriptional units in Listeria monocytogenes
Source: Research Square preprint supplement (doi:10.21203/rs.3.rs-1530110/v1), 2022-04-21
Supplement: Supplementary file 4 [file 67e2944c5d492c20d47b7b0c.xlsx]

## Sheet: RO15_circRNAs
Table S5. List of circ-RNAs based on ANNOgesic prediction.
##gff-version 3
seqid	source	type	start	end	score	strand	phase	attributes
CADEHJ010000001.1	ANNOgesic	circRNA	55576	55673	.	+	.	ID=CADEHJ010000001.1_circrna22;name=circRNA_22;support_reads=13;read_at_start=1.0;read_at_end=0.7647058823529411;conflict=NA;method=segemehl
CADEHJ010000001.1	ANNOgesic	circRNA	251309	251429	.	+	.	ID=CADEHJ010000001.1_circrna223;name=circRNA_223;support_reads=34;read_at_start=1.0;read_at_end=0.9444444444444444;conflict=NA;method=segemehl
CADEHJ010000001.1	ANNOgesic	circRNA	983836	983904	.	+	.	ID=CADEHJ010000001.1_circrna585;name=circRNA_585;support_reads=14;read_at_start=1.0;read_at_end=0.9333333333333333;conflict=NA;method=segemehl
CADEHJ010000001.1	ANNOgesic	circRNA	1013179	1013278	.	+	.	ID=CADEHJ010000001.1_circrna614;name=circRNA_614;support_reads=18;read_at_start=0.9473684210526315;read_at_end=0.8571428571428571;conflict=NA;method=segemehl
CADEHJ010000001.1	ANNOgesic	circRNA	1131373	1131435	.	+	.	ID=CADEHJ010000001.1_circrna707;name=circRNA_707;support_reads=14;read_at_start=0.9333333333333333;read_at_end=0.7777777777777778;conflict=NA;method=segemehl
CADEHJ010000001.1	ANNOgesic	circRNA	1635642	1635717	.	+	.	ID=CADEHJ010000001.1_circrna975;name=circRNA_975;support_reads=26;read_at_start=0.8666666666666667;read_at_end=0.896551724137931;conflict=NA;method=segemehl
CADEHJ010000001.1	ANNOgesic	circRNA	1756825	1757666	.	+	.	ID=CADEHJ010000001.1_circrna1081;name=circRNA_1081;support_reads=17;read_at_start=0.6538461538461539;read_at_end=0.5862068965517241;conflict=NA;method=segemehl
CADEHJ010000001.1	ANNOgesic	circRNA	1757124	1757230	.	+	.	ID=CADEHJ010000001.1_circrna1083;name=circRNA_1083;support_reads=11;read_at_start=0.6470588235294118;read_at_end=0.8461538461538461;conflict=NA;method=segemehl
CADEHJ010000001.1	ANNOgesic	circRNA	1760361	1760476	.	+	.	ID=CADEHJ010000001.1_circrna1114;name=circRNA_1114;support_reads=27;read_at_start=0.8709677419354839;read_at_end=0.5094339622641509;conflict=NA;method=segemehl
CADEHJ010000001.1	ANNOgesic	circRNA	2527456	2527670	.	+	.	ID=CADEHJ010000001.1_circrna1666;name=circRNA_1666;support_reads=12;read_at_start=0.8;read_at_end=0.5;conflict=NA;method=segemehl
