# Supplementary material for: RNA editing, RNA modifications, and transcriptional units in Listeria monocytogenes
Source: Research Square preprint supplement (doi:10.21203/rs.3.rs-1530110/v1), 2022-04-21

**Figure S6. Screenshot of IGV visualization on *L. monocytogenes* RO15 region 2.559 Mbp - 2.560 Mbp includes prophage genes OCPFDLNE\_02579 and OCPFDLNE\_02580, which are potentially related to barotolerance.** Eight rows of visualizations, in descending order: 0 min control sample for 200 MPa cap-seq reads, 0 min 200 MPa treated samples cap-seq reads, 0 min control sample for 400 MPa cap-seq reads, 0 min 400 MPa treated samples cap-seq reads, 24 h control sample for 400 MPa cap-seq reads, 24 h 400 MPa-treated sample cap-seq reads, 24 h control sample for 400 MPa direct RNA-seq reads, and 24 h 400 MPa treated sample direct RNA-seq reads. Red lines are forward reads, and blue lines are reverse reads. Grey bars are coverage bar plots. Purple triangle and following purple "I" indicates insertion regions on the sequencing read. Green arrows indicate TSS.

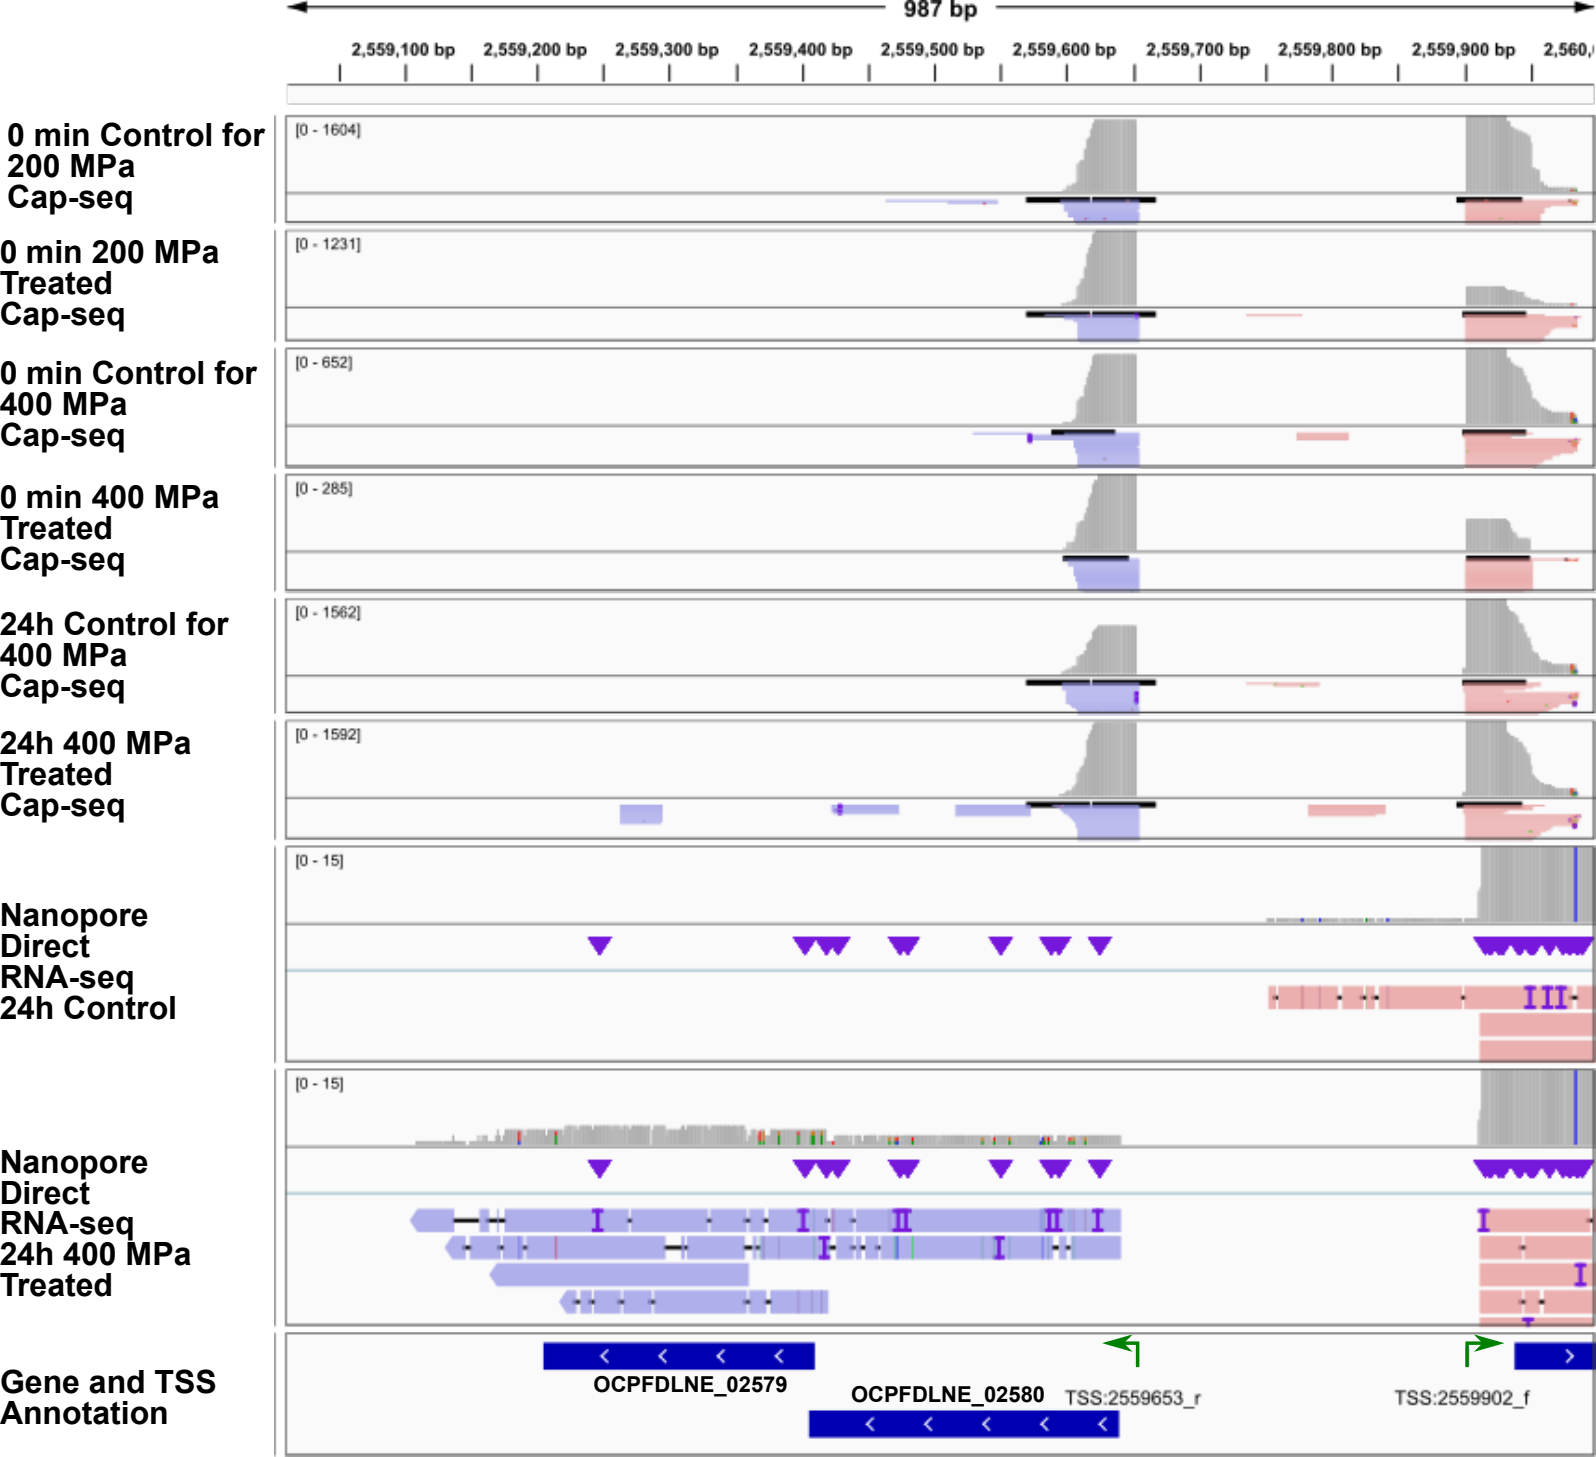

Supplement: Supplementary file 5 [file c57dd8c0d221201e53fc3ef5.pdf]
