# Supplementary material for: RNA editing, RNA modifications, and transcriptional units in Listeria monocytogenes
Source: Research Square preprint supplement (doi:10.21203/rs.3.rs-1530110/v1), 2022-04-21
Supplement: Supplementary file 6 [file 803d726ae6d128c6ca152ccf.xlsx]

## Sheet: list
Table S6. List of prophage genes reported to be linked with barotolerance in Duru et al. [12].
Gene ID	Locus_tag	annotation
CAB3280260.1	OCPFDLNE_02194	hypothetical protein
CAB3280261.1	OCPFDLNE_02195	RNA-binding protein (Fragment) / ASCH domain-containing protein
CAB3280262.1	OCPFDLNE_02196	hypothetical protein
CAB3280264.1	OCPFDLNE_02198	DNA-directed RNA polymerase 2 subunit
CAB3280619.1	OCPFDLNE_02579	hypothetical protein
CAB3280620.1	OCPFDLNE_02580	hypothetical protein
CAB3280630.1	OCPFDLNE_02590	hypothetical protein
CAB3280631.1	OCPFDLNE_02591	Phage baseplate upper protein / Long tail fibre
CAB3280646.1	OCPFDLNE_02606	Phage minor structural protein GP20
CAB3280837.1	OCPFDLNE_02798	hypothetical protein
