# Supplementary material for: RNA editing, RNA modifications, and transcriptional units in Listeria monocytogenes
Source: Research Square preprint supplement (doi:10.21203/rs.3.rs-1530110/v1), 2022-04-21

**Figure S8. Visualization of CRISPR array location on *L. monocytogenes* RO15 region 543550 bp - 545050 Mbp.** Six data rows, in descending order: combined Illumina RNA-seq reads, combine cap-seq reads, Nanopore direct RNA-seq for control sample (R312) reads, Nanopore direct RNA-seq for sample 400 MPa treated (R173) reads, Genbank annotation, and TSS prediction annotation. Red lines are forward reads, and blue lines are reverse reads. Grey bars are coverage bar plots. Purple triangle indicates insertion regions on the sequencing read. The region includes the CRISPR array with 54 spacer sequences. One forward TSS was predicted at the beginning of the CRISPR array.

CADEHJ010000001.1:543,500-545,077

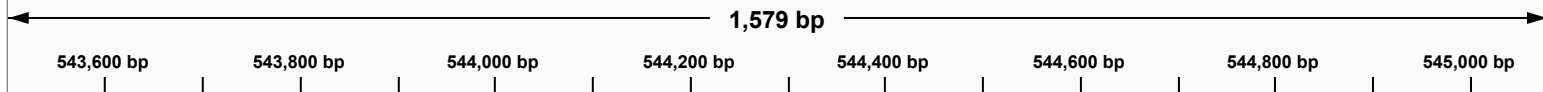

Illumina  
RNA-seq

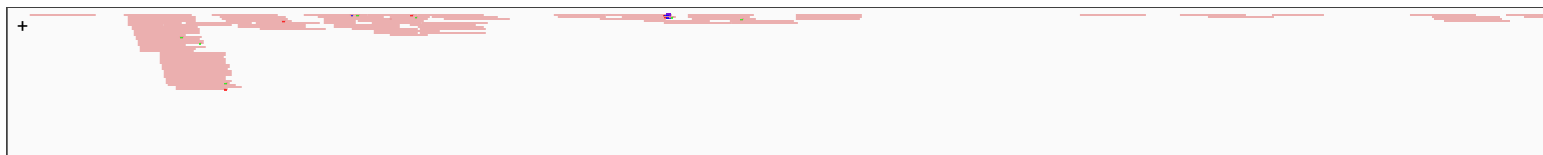

Cappable-  
seq

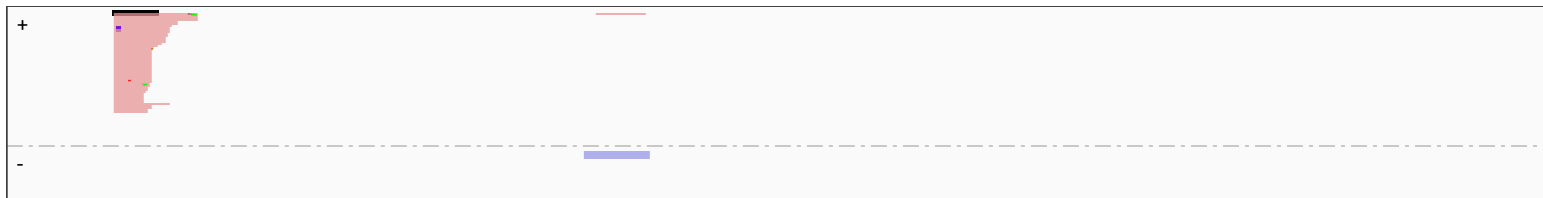

Nanopore  
Direct  
RNA-seq  
(R312)

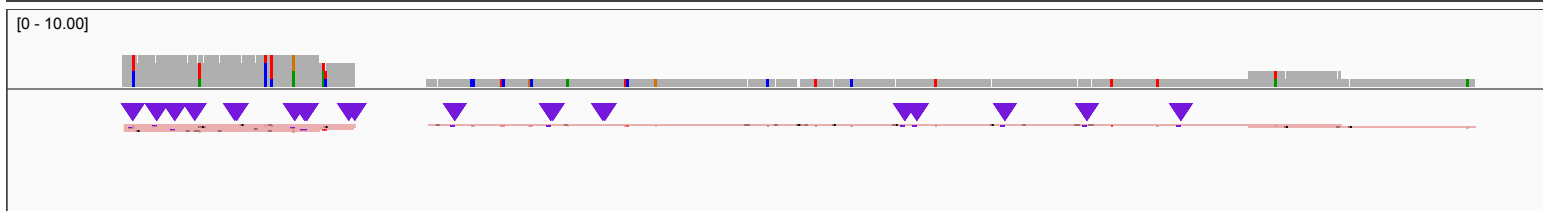

Nanopore  
Direct  
RNA-seq  
(R173  
400MPa)

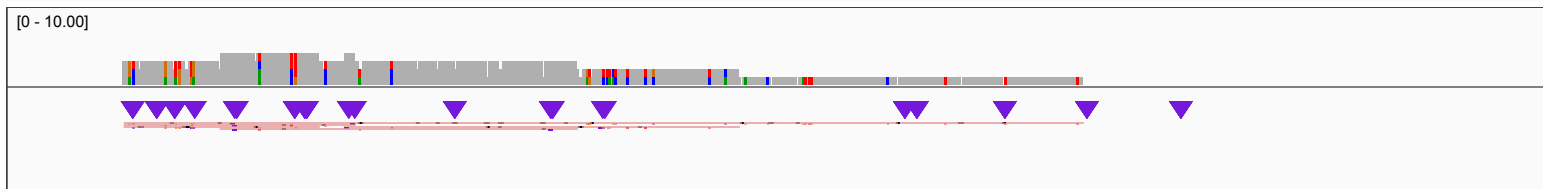

Annotation

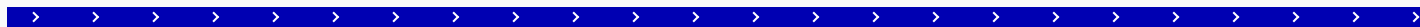

TSSs

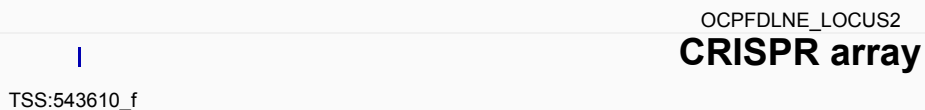

Supplement: Supplementary file 6 [file fc91c2b80c858e0ad8337480.pdf]
