# Supplementary material for: RNA editing, RNA modifications, and transcriptional units in Listeria monocytogenes
Source: Research Square preprint supplement (doi:10.21203/rs.3.rs-1530110/v1), 2022-04-21
Supplement: Supplementary file 12 [file 3b793d21cf45c0fe03843555.xlsx]

## Sheet: EGD-e_asRNA
Table S3. Positions of lifted EGD-e antisense TSSs to RO15 genome. Sheet 1: list of antisense TSS predicted in EGD-e [21], Sheet 2: EGD-e antisense TSS lifted to RO15, Sheet 3: list of antisense TSS predicted in RO15 using ANNOgesic, Sheet 4: overlapped antisense TSS positions between EGD-e and RO15. Sheet 5: antisense RNA prediction results by ANNOgesic.
Wurtzel et al. EGD-e asRNA positions
Positions (start,end) in EGD-e genome
##gff-version 3
NC_003210.1	Wurtzel et al	asRNA	48637	48637	.	-	.	Name=anti0043
NC_003210.1	Wurtzel et al	asRNA	172186	172186	.	+	.	Name=anti0172 / rli23
NC_003210.1	Wurtzel et al	asRNA	357591	357591	.	-	.	Name=anti0330 / rli25
NC_003210.1	Wurtzel et al	asRNA	412094	412094	.	-	.	Name=anti0387
NC_003210.1	Wurtzel et al	asRNA	441667	441667	.	+	.	Name=anti0421
NC_003210.1	Wurtzel et al	asRNA	444354	444354	.	+	.	Name=anti0424
NC_003210.1	Wurtzel et al	asRNA	471939	471939	.	+	.	Name=anti0441
NC_003210.1	Wurtzel et al	asRNA	506968	506968	.	-	.	Name=anti0470
NC_003210.1	Wurtzel et al	asRNA	540769	540769	.	-	.	Name=anti0506 / rli30
NC_003210.1	Wurtzel et al	asRNA	607849	607849	.	-	.	Name=anti0570
NC_003210.1	Wurtzel et al	asRNA	608233	608233	.	+	.	Name=anti0571
NC_003210.1	Wurtzel et al	asRNA	643800	643800	.	+	.	Name=anti0605
NC_003210.1	Wurtzel et al	asRNA	689529	689529	.	+	.	Name=anti0647-1
NC_003210.1	Wurtzel et al	asRNA	689786	689786	.	+	.	Name=anti0647-2
NC_003210.1	Wurtzel et al	asRNA	705124	705124	.	-	.	Name=anti0667
NC_003210.1	Wurtzel et al	asRNA	707869	707869	.	-	.	Name=anti0671
NC_003210.1	Wurtzel et al	asRNA	712447	712447	.	-	.	Name=anti0675-677
NC_003210.1	Wurtzel et al	asRNA	827498	827498	.	+	.	Name=anti0799
NC_003210.1	Wurtzel et al	asRNA	838843	838843	.	-	.	Name=anti0811
NC_003210.1	Wurtzel et al	asRNA	855467	855467	.	-	.	Name=anti0828 / rli35
NC_003210.1	Wurtzel et al	asRNA	926280	926280	.	-	.	Name=anti0887
NC_003210.1	Wurtzel et al	asRNA	981666	981666	.	-	.	Name=anti0946 / anti-LhrC-5
NC_003210.1	Wurtzel et al	asRNA	1000409	1000409	.	-	.	Name=anti0968
NC_003210.1	Wurtzel et al	asRNA	1007804	1007804	.	+	.	Name=anti0977
NC_003210.1	Wurtzel et al	asRNA	1051778	1051778	.	-	.	Name=anti1023
NC_003210.1	Wurtzel et al	asRNA	1112017	1112017	.	-	.	Name=anti1079
NC_003210.1	Wurtzel et al	asRNA	1130253	1130253	.	-	.	Name=anti1096
NC_003210.1	Wurtzel et al	asRNA	1213983	1213983	.	-	.	Name=anti1188
NC_003210.1	Wurtzel et al	asRNA	1263477	1263477	.	+	.	Name=anti1236
NC_003210.1	Wurtzel et al	asRNA	1279827	1279827	.	+	.	Name=anti1255
NC_003210.1	Wurtzel et al	asRNA	1302913	1302913	.	-	.	Name=anti1278
NC_003210.1	Wurtzel et al	asRNA	1303985	1303985	.	-	.	Name=anti1279
NC_003210.1	Wurtzel et al	asRNA	1307098	1307098	.	+	.	Name=anti1284
NC_003210.1	Wurtzel et al	asRNA	1426971	1426971	.	-	.	Name=anti1399
NC_003210.1	Wurtzel et al	asRNA	1495433	1495433	.	-	.	Name=anti1461
NC_003210.1	Wurtzel et al	asRNA	1704657	1704657	.	+	.	Name=anti1655
NC_003210.1	Wurtzel et al	asRNA	1724454	1724454	.	-	.	Name=anti1670
NC_003210.1	Wurtzel et al	asRNA	1732471	1732471	.	-	.	Name=anti1677
NC_003210.1	Wurtzel et al	asRNA	1769524	1769524	.	-	.	Name=anti1707
NC_003210.1	Wurtzel et al	asRNA	1770069	1770069	.	+	.	Name=anti1708
NC_003210.1	Wurtzel et al	asRNA	1800500	1800500	.	+	.	Name=anti1734
NC_003210.1	Wurtzel et al	asRNA	1820461	1820461	.	+	.	Name=anti1751
NC_003210.1	Wurtzel et al	asRNA	1854469	1854469	.	+	.	Name=anti1777
NC_003210.1	Wurtzel et al	asRNA	1890969	1890969	.	-	.	Name=anti1816
NC_003210.1	Wurtzel et al	asRNA	1906099	1906099	.	-	.	Name=anti1830
NC_003210.1	Wurtzel et al	asRNA	1923362	1923362	.	-	.	Name=anti1846
NC_003210.1	Wurtzel et al	asRNA	1982299	1982299	.	-	.	Name=anti1909
NC_003210.1	Wurtzel et al	asRNA	2052744	2052744	.	-	.	Name=anti1980
NC_003210.1	Wurtzel et al	asRNA	2052941	2052941	.	+	.	Name=anti1981
NC_003210.1	Wurtzel et al	asRNA	2129647	2129647	.	+	.	Name=anti2046
NC_003210.1	Wurtzel et al	asRNA	2139794	2139794	.	+	.	Name=anti2057
NC_003210.1	Wurtzel et al	asRNA	2172517	2172517	.	-	.	Name=anti2092
NC_003210.1	Wurtzel et al	asRNA	2174997	2174997	.	+	.	Name=anti2095 / rli65
NC_003210.1	Wurtzel et al	asRNA	2194624	2194624	.	-	.	Name=anti2114
NC_003210.1	Wurtzel et al	asRNA	2194478	2194478	.	-	.	Name=anti2115
NC_003210.1	Wurtzel et al	asRNA	2333247	2333247	.	+	.	Name=anti2241
NC_003210.1	Wurtzel et al	asRNA	2347318	2347318	.	+	.	Name=anti2260
NC_003210.1	Wurtzel et al	asRNA	2350055	2350055	.	-	.	Name=anti2263
NC_003210.1	Wurtzel et al	asRNA	2360554	2360554	.	-	.	Name=anti2270
NC_003210.1	Wurtzel et al	asRNA	2397277	2397277	.	+	.	Name=anti2325-2327
NC_003210.1	Wurtzel et al	asRNA	2468166	2468166	.	+	.	Name=anti2394
NC_003210.1	Wurtzel et al	asRNA	2489486	2489486	.	+	.	Name=anti2418
NC_003210.1	Wurtzel et al	asRNA	2497360	2497360	.	+	.	Name=anti2428
NC_003210.1	Wurtzel et al	asRNA	2637680	2637680	.	-	.	Name=anti2558
NC_003210.1	Wurtzel et al	asRNA	2749549	2749549	.	+	.	Name=anti2678
NC_003210.1	Wurtzel et al	asRNA	2775792	2775792	.	-	.	Name=anti2700
NC_003210.1	Wurtzel et al	asRNA	2792160	2792160	.	+	.	Name=anti2717
NC_003210.1	Wurtzel et al	asRNA	2798064	2798064	.	-	.	Name=anti2722
NC_003210.1	Wurtzel et al	asRNA	2820726	2820726	.	-	.	Name=anti2745
NC_003210.1	Wurtzel et al	asRNA	2824111	2824111	.	-	.	Name=anti2749

## Sheet: EGD-e_asRNA_lifted_mapped
EGD-e asRNA positions lifted to RO15 genome
Positions (start,end) in RO15 genome
##gff-version 3
CADEHJ010000001.1	CrossMap	asRNA	52421	52421	.	-	.	Name=anti0043
CADEHJ010000001.1	CrossMap	asRNA	175993	175993	.	+	.	Name=anti0172 / rli23
CADEHJ010000001.1	CrossMap	asRNA	419406	419406	.	-	.	Name=anti0387
CADEHJ010000001.1	CrossMap	asRNA	448979	448979	.	+	.	Name=anti0421
CADEHJ010000001.1	CrossMap	asRNA	451677	451677	.	+	.	Name=anti0424
CADEHJ010000001.1	CrossMap	asRNA	472326	472326	.	+	.	Name=anti0441
CADEHJ010000001.1	CrossMap	asRNA	522918	522918	.	-	.	Name=anti0506 / rli30
CADEHJ010000001.1	CrossMap	asRNA	602523	602523	.	-	.	Name=anti0570
CADEHJ010000001.1	CrossMap	asRNA	602907	602907	.	+	.	Name=anti0571
CADEHJ010000001.1	CrossMap	asRNA	639970	639970	.	+	.	Name=anti0605
CADEHJ010000001.1	CrossMap	asRNA	719617	719617	.	+	.	Name=anti0647-1
CADEHJ010000001.1	CrossMap	asRNA	719874	719874	.	+	.	Name=anti0647-2
CADEHJ010000001.1	CrossMap	asRNA	735213	735213	.	-	.	Name=anti0667
CADEHJ010000001.1	CrossMap	asRNA	737956	737956	.	-	.	Name=anti0671
CADEHJ010000001.1	CrossMap	asRNA	742535	742535	.	-	.	Name=anti0675-677
CADEHJ010000001.1	CrossMap	asRNA	857584	857584	.	+	.	Name=anti0799
CADEHJ010000001.1	CrossMap	asRNA	874449	874449	.	-	.	Name=anti0811
CADEHJ010000001.1	CrossMap	asRNA	1069058	1069058	.	+	.	Name=anti0828 / rli35
CADEHJ010000001.1	CrossMap	asRNA	960581	960581	.	-	.	Name=anti0887
CADEHJ010000001.1	CrossMap	asRNA	1015737	1015737	.	-	.	Name=anti0946 / anti-LhrC-5
CADEHJ010000001.1	CrossMap	asRNA	1034370	1034370	.	-	.	Name=anti0968
CADEHJ010000001.1	CrossMap	asRNA	1041765	1041765	.	+	.	Name=anti0977
CADEHJ010000001.1	CrossMap	asRNA	1087009	1087009	.	-	.	Name=anti1023
CADEHJ010000001.1	CrossMap	asRNA	1147234	1147234	.	-	.	Name=anti1079
CADEHJ010000001.1	CrossMap	asRNA	1165469	1165469	.	-	.	Name=anti1096
CADEHJ010000001.1	CrossMap	asRNA	1226900	1226900	.	-	.	Name=anti1188
CADEHJ010000001.1	CrossMap	asRNA	1276392	1276392	.	+	.	Name=anti1236
CADEHJ010000001.1	CrossMap	asRNA	1292743	1292743	.	+	.	Name=anti1255
CADEHJ010000001.1	CrossMap	asRNA	1315841	1315841	.	-	.	Name=anti1278
CADEHJ010000001.1	CrossMap	asRNA	1316913	1316913	.	-	.	Name=anti1279
CADEHJ010000001.1	CrossMap	asRNA	1320025	1320025	.	+	.	Name=anti1284
CADEHJ010000001.1	CrossMap	asRNA	1439844	1439844	.	-	.	Name=anti1399
CADEHJ010000001.1	CrossMap	asRNA	1508312	1508312	.	-	.	Name=anti1461
CADEHJ010000001.1	CrossMap	asRNA	1716071	1716071	.	+	.	Name=anti1655
CADEHJ010000001.1	CrossMap	asRNA	1737280	1737280	.	-	.	Name=anti1670
CADEHJ010000001.1	CrossMap	asRNA	1745297	1745297	.	-	.	Name=anti1677
CADEHJ010000001.1	CrossMap	asRNA	1782348	1782348	.	-	.	Name=anti1707
CADEHJ010000001.1	CrossMap	asRNA	1782893	1782893	.	+	.	Name=anti1708
CADEHJ010000001.1	CrossMap	asRNA	1813327	1813327	.	+	.	Name=anti1734
CADEHJ010000001.1	CrossMap	asRNA	1833289	1833289	.	+	.	Name=anti1751
CADEHJ010000001.1	CrossMap	asRNA	1867300	1867300	.	+	.	Name=anti1777
CADEHJ010000001.1	CrossMap	asRNA	1904768	1904768	.	-	.	Name=anti1816
CADEHJ010000001.1	CrossMap	asRNA	1919898	1919898	.	-	.	Name=anti1830
CADEHJ010000001.1	CrossMap	asRNA	1937165	1937165	.	-	.	Name=anti1846
CADEHJ010000001.1	CrossMap	asRNA	1996102	1996102	.	-	.	Name=anti1909
CADEHJ010000001.1	CrossMap	asRNA	2066546	2066546	.	-	.	Name=anti1980
CADEHJ010000001.1	CrossMap	asRNA	2066743	2066743	.	+	.	Name=anti1981
CADEHJ010000001.1	CrossMap	asRNA	2143443	2143443	.	+	.	Name=anti2046
CADEHJ010000001.1	CrossMap	asRNA	2153590	2153590	.	+	.	Name=anti2057
CADEHJ010000001.1	CrossMap	asRNA	2234293	2234293	.	-	.	Name=anti2092
CADEHJ010000001.1	CrossMap	asRNA	2236773	2236773	.	+	.	Name=anti2095 / rli65
CADEHJ010000001.1	CrossMap	asRNA	2256400	2256400	.	-	.	Name=anti2114
CADEHJ010000001.1	CrossMap	asRNA	2256254	2256254	.	-	.	Name=anti2115
CADEHJ010000001.1	CrossMap	asRNA	2394999	2394999	.	+	.	Name=anti2241
CADEHJ010000001.1	CrossMap	asRNA	2409071	2409071	.	+	.	Name=anti2260
CADEHJ010000001.1	CrossMap	asRNA	2411808	2411808	.	-	.	Name=anti2263
CADEHJ010000001.1	CrossMap	asRNA	2422307	2422307	.	-	.	Name=anti2270
CADEHJ010000001.1	CrossMap	asRNA	2488071	2488071	.	+	.	Name=anti2394
CADEHJ010000001.1	CrossMap	asRNA	2507003	2507003	.	+	.	Name=anti2418
CADEHJ010000001.1	CrossMap	asRNA	2514876	2514876	.	+	.	Name=anti2428
CADEHJ010000001.1	CrossMap	asRNA	2697055	2697055	.	-	.	Name=anti2558
CADEHJ010000001.1	CrossMap	asRNA	2855477	2855477	.	+	.	Name=anti2678
CADEHJ010000001.1	CrossMap	asRNA	2881716	2881716	.	-	.	Name=anti2700
CADEHJ010000001.1	CrossMap	asRNA	2898085	2898085	.	+	.	Name=anti2717
CADEHJ010000001.1	CrossMap	asRNA	2903989	2903989	.	-	.	Name=anti2722
CADEHJ010000001.1	CrossMap	asRNA	2926649	2926649	.	-	.	Name=anti2745
CADEHJ010000001.1	CrossMap	asRNA	2930033	2930033	.	-	.	Name=anti2749

## Sheet: RO15_antisense_TSS
##gff-version 3
CADEHJ010000001.1	ANNOgesic	TSS	77499	77499	.	-	.	Name=TSS:77499_r;ID=CADEHJ010000001.1_tss31;type=Antisense;utr_length=Antisense_NA;associated_gene=OCPFDLNE_00072;libs=all;method=TSSpredator
CADEHJ010000001.1	ANNOgesic	TSS	87030	87030	.	+	.	Name=TSS:87030_f;ID=CADEHJ010000001.1_tss36;type=Primary,Antisense;utr_length=Primary_32,Antisense_NA;associated_gene=OCPFDLNE_00085,OCPFDLNE_00084;libs=all;method=TSSpredator
CADEHJ010000001.1	ANNOgesic	TSS	95355	95355	.	-	.	Name=TSS:95355_r;ID=CADEHJ010000001.1_tss40;type=Antisense;utr_length=Antisense_NA;associated_gene=OCPFDLNE_00094;libs=all;method=TSSpredator
CADEHJ010000001.1	ANNOgesic	TSS	114477	114477	.	-	.	Name=TSS:114477_r;ID=CADEHJ010000001.1_tss47;type=Antisense;utr_length=Antisense_NA;associated_gene=OCPFDLNE_00110;libs=all;method=TSSpredator
CADEHJ010000001.1	ANNOgesic	TSS	156649	156649	.	+	.	Name=TSS:156649_f;ID=CADEHJ010000001.1_tss64;type=Antisense;utr_length=Antisense_NA;associated_gene=OCPFDLNE_00161;libs=all;method=TSSpredator
CADEHJ010000001.1	ANNOgesic	TSS	160897	160897	.	-	.	Name=TSS:160897_r;ID=CADEHJ010000001.1_tss67;type=Antisense;utr_length=Antisense_NA;associated_gene=OCPFDLNE_00164;libs=all;method=TSSpredator
CADEHJ010000001.1	ANNOgesic	TSS	170802	170802	.	-	.	Name=TSS:170802_r;ID=CADEHJ010000001.1_tss72;type=Primary,Antisense;utr_length=Primary_24,Antisense_NA;associated_gene=OCPFDLNE_00173,OCPFDLNE_00174;libs=all;method=TSSpredator
CADEHJ010000001.1	ANNOgesic	TSS	170867	170867	.	+	.	Name=TSS:170867_f;ID=CADEHJ010000001.1_tss73;type=Primary,Antisense;utr_length=Primary_26,Antisense_NA;associated_gene=OCPFDLNE_00174,OCPFDLNE_00173;libs=all;method=TSSpredator
CADEHJ010000001.1	ANNOgesic	TSS	175993	175993	.	+	.	Name=TSS:175993_f;ID=CADEHJ010000001.1_tss75;type=Antisense;utr_length=Antisense_NA;associated_gene=OCPFDLNE_00177;libs=all;method=TSSpredator
CADEHJ010000001.1	ANNOgesic	TSS	235200	235200	.	-	.	Name=TSS:235200_r;ID=CADEHJ010000001.1_tss108;type=Antisense;utr_length=Antisense_NA;associated_gene=OCPFDLNE_00227;libs=all;method=TSSpredator
CADEHJ010000001.1	ANNOgesic	TSS	260578	260578	.	-	.	Name=TSS:260578_r;ID=CADEHJ010000001.1_tss136;type=Antisense;utr_length=Antisense_NA;associated_gene=OCPFDLNE_00255;libs=all;method=TSSpredator
CADEHJ010000001.1	ANNOgesic	TSS	310577	310577	.	-	.	Name=TSS:310577_r;ID=CADEHJ010000001.1_tss159;type=Primary,Antisense;utr_length=Primary_24,Antisense_NA;associated_gene=OCPFDLNE_00298,OCPFDLNE_00299;libs=all;method=TSSpredator
CADEHJ010000001.1	ANNOgesic	TSS	409905	409905	.	-	.	Name=TSS:409905_r;ID=CADEHJ010000001.1_tss203;type=Primary,Antisense;utr_length=Primary_59,Antisense_NA;associated_gene=OCPFDLNE_00394,OCPFDLNE_00395;libs=all;method=TSSpredator
CADEHJ010000001.1	ANNOgesic	TSS	409912	409912	.	+	.	Name=TSS:409912_f;ID=CADEHJ010000001.1_tss204;type=Primary,Antisense;utr_length=Primary_36,Antisense_NA;associated_gene=OCPFDLNE_00395,OCPFDLNE_00394;libs=all;method=TSSpredator
CADEHJ010000001.1	ANNOgesic	TSS	421304	421304	.	-	.	Name=TSS:421304_r;ID=CADEHJ010000001.1_tss207;type=Primary,Antisense;utr_length=Primary_28,Antisense_NA;associated_gene=OCPFDLNE_00407,OCPFDLNE_00408;libs=all;method=TSSpredator
CADEHJ010000001.1	ANNOgesic	TSS	421370	421370	.	+	.	Name=TSS:421370_f;ID=CADEHJ010000001.1_tss208;type=Internal,Antisense;utr_length=Internal_NA,Antisense_NA;associated_gene=OCPFDLNE_00408,OCPFDLNE_00407;libs=all;method=TSSpredator
CADEHJ010000001.1	ANNOgesic	TSS	424520	424520	.	-	.	Name=TSS:424520_r;ID=CADEHJ010000001.1_tss211;type=Antisense;utr_length=Antisense_NA;associated_gene=OCPFDLNE_00412;libs=all;method=TSSpredator
CADEHJ010000001.1	ANNOgesic	TSS	426110	426110	.	-	.	Name=TSS:426110_r;ID=CADEHJ010000001.1_tss212;type=Primary,Antisense;utr_length=Primary_35,Antisense_NA;associated_gene=OCPFDLNE_00414,OCPFDLNE_00415;libs=all;method=TSSpredator
CADEHJ010000001.1	ANNOgesic	TSS	430496	430496	.	-	.	Name=TSS:430496_r;ID=CADEHJ010000001.1_tss215;type=Antisense;utr_length=Antisense_NA;associated_gene=OCPFDLNE_00419;libs=all;method=TSSpredator
CADEHJ010000001.1	ANNOgesic	TSS	436332	436332	.	-	.	Name=TSS:436332_r;ID=CADEHJ010000001.1_tss220;type=Antisense;utr_length=Antisense_NA;associated_gene=OCPFDLNE_00425;libs=all;method=TSSpredator
CADEHJ010000001.1	ANNOgesic	TSS	438924	438924	.	-	.	Name=TSS:438924_r;ID=CADEHJ010000001.1_tss222;type=Antisense;utr_length=Antisense_NA;associated_gene=OCPFDLNE_00427;libs=all;method=TSSpredator
CADEHJ010000001.1	ANNOgesic	TSS	442129	442129	.	+	.	Name=TSS:442129_f;ID=CADEHJ010000001.1_tss223;type=Antisense;utr_length=Antisense_NA;associated_gene=OCPFDLNE_00428;libs=all;method=TSSpredator
CADEHJ010000001.1	ANNOgesic	TSS	447435	447435	.	+	.	Name=TSS:447435_f;ID=CADEHJ010000001.1_tss230;type=Antisense;utr_length=Antisense_NA;associated_gene=OCPFDLNE_00436;libs=all;method=TSSpredator
CADEHJ010000001.1	ANNOgesic	TSS	459784	459784	.	-	.	Name=TSS:459784_r;ID=CADEHJ010000001.1_tss233;type=Primary,Antisense;utr_length=Primary_55,Antisense_NA;associated_gene=OCPFDLNE_00447,OCPFDLNE_00448;libs=all;method=TSSpredator
CADEHJ010000001.1	ANNOgesic	TSS	459820	459820	.	+	.	Name=TSS:459820_f;ID=CADEHJ010000001.1_tss234;type=Primary,Antisense;utr_length=Primary_27,Antisense_NA;associated_gene=OCPFDLNE_00448,OCPFDLNE_00447;libs=all;method=TSSpredator
CADEHJ010000001.1	ANNOgesic	TSS	466818	466818	.	-	.	Name=TSS:466818_r;ID=CADEHJ010000001.1_tss236;type=Primary,Antisense;utr_length=Primary_11,Antisense_NA;associated_gene=OCPFDLNE_00452,OCPFDLNE_00453;libs=all;method=TSSpredator
CADEHJ010000001.1	ANNOgesic	TSS	522918	522918	.	-	.	Name=TSS:522918_r;ID=CADEHJ010000001.1_tss265;type=Antisense;utr_length=Antisense_NA;associated_gene=OCPFDLNE_00505;libs=all;method=TSSpredator
CADEHJ010000001.1	ANNOgesic	TSS	581720	581720	.	-	.	Name=TSS:581720_r;ID=CADEHJ010000001.1_tss289;type=Antisense;utr_length=Antisense_NA;associated_gene=OCPFDLNE_00555;libs=all;method=TSSpredator
CADEHJ010000001.1	ANNOgesic	TSS	601283	601283	.	+	.	Name=TSS:601283_f;ID=CADEHJ010000001.1_tss299;type=Antisense;utr_length=Antisense_NA;associated_gene=OCPFDLNE_00576;libs=all;method=TSSpredator
CADEHJ010000001.1	ANNOgesic	TSS	603178	603178	.	-	.	Name=TSS:603178_r;ID=CADEHJ010000001.1_tss302;type=Primary,Antisense;utr_length=Primary_24,Antisense_NA;associated_gene=OCPFDLNE_00578,OCPFDLNE_00579;libs=all;method=TSSpredator
CADEHJ010000001.1	ANNOgesic	TSS	639970	639970	.	+	.	Name=TSS:639970_f;ID=CADEHJ010000001.1_tss325;type=Antisense;utr_length=Antisense_NA;associated_gene=OCPFDLNE_00612;libs=all;method=TSSpredator
CADEHJ010000001.1	ANNOgesic	TSS	654662	654662	.	-	.	Name=TSS:654662_r;ID=CADEHJ010000001.1_tss331;type=Primary,Antisense;utr_length=Primary_27,Antisense_NA;associated_gene=OCPFDLNE_00626,OCPFDLNE_00627;libs=all;method=TSSpredator
CADEHJ010000001.1	ANNOgesic	TSS	654719	654719	.	+	.	Name=TSS:654719_f;ID=CADEHJ010000001.1_tss332;type=Primary,Antisense;utr_length=Primary_23,Antisense_NA;associated_gene=OCPFDLNE_00627,OCPFDLNE_00626;libs=all;method=TSSpredator
CADEHJ010000001.1	ANNOgesic	TSS	693125	693125	.	-	.	Name=TSS:693125_r;ID=CADEHJ010000001.1_tss345;type=Antisense;utr_length=Antisense_NA;associated_gene=OCPFDLNE_00678;libs=all;method=TSSpredator
CADEHJ010000001.1	ANNOgesic	TSS	719617	719617	.	+	.	Name=TSS:719617_f;ID=CADEHJ010000001.1_tss358;type=Antisense;utr_length=Antisense_NA;associated_gene=OCPFDLNE_00701;libs=all;method=TSSpredator
CADEHJ010000001.1	ANNOgesic	TSS	719948	719948	.	-	.	Name=TSS:719948_r;ID=CADEHJ010000001.1_tss359;type=Primary,Antisense;utr_length=Primary_35,Antisense_NA;associated_gene=OCPFDLNE_00701,OCPFDLNE_00702;libs=all;method=TSSpredator
CADEHJ010000001.1	ANNOgesic	TSS	720438	720438	.	-	.	Name=TSS:720438_r;ID=CADEHJ010000001.1_tss360;type=Antisense;utr_length=Antisense_NA;associated_gene=OCPFDLNE_00702;libs=all;method=TSSpredator
CADEHJ010000001.1	ANNOgesic	TSS	725849	725849	.	+	.	Name=TSS:725849_f;ID=CADEHJ010000001.1_tss363;type=Antisense;utr_length=Antisense_NA;associated_gene=OCPFDLNE_00707;libs=all;method=TSSpredator
CADEHJ010000001.1	ANNOgesic	TSS	728323	728323	.	-	.	Name=TSS:728323_r;ID=CADEHJ010000001.1_tss366;type=Primary,Antisense;utr_length=Primary_37,Antisense_NA;associated_gene=OCPFDLNE_00710,OCPFDLNE_00711;libs=all;method=TSSpredator
CADEHJ010000001.1	ANNOgesic	TSS	735474	735474	.	-	.	Name=TSS:735474_r;ID=CADEHJ010000001.1_tss372;type=Antisense;utr_length=Antisense_NA;associated_gene=OCPFDLNE_00721;libs=all;method=TSSpredator
CADEHJ010000001.1	ANNOgesic	TSS	742535	742535	.	-	.	Name=TSS:742535_r;ID=CADEHJ010000001.1_tss379;type=Antisense;utr_length=Antisense_NA;associated_gene=OCPFDLNE_00732;libs=all;method=TSSpredator
CADEHJ010000001.1	ANNOgesic	TSS	781390	781390	.	+	.	Name=TSS:781390_f;ID=CADEHJ010000001.1_tss382;type=Secondary,Antisense;utr_length=Secondary_295,Antisense_NA;associated_gene=OCPFDLNE_00777,OCPFDLNE_00776;libs=all;method=TSSpredator
CADEHJ010000001.1	ANNOgesic	TSS	797764	797764	.	-	.	Name=TSS:797764_r;ID=CADEHJ010000001.1_tss393;type=Antisense;utr_length=Antisense_NA;associated_gene=OCPFDLNE_00792;libs=all;method=TSSpredator
CADEHJ010000001.1	ANNOgesic	TSS	820888	820888	.	-	.	Name=TSS:820888_r;ID=CADEHJ010000001.1_tss402;type=Antisense;utr_length=Antisense_NA;associated_gene=OCPFDLNE_00818;libs=all;method=TSSpredator
CADEHJ010000001.1	ANNOgesic	TSS	828818	828818	.	+	.	Name=TSS:828818_f;ID=CADEHJ010000001.1_tss407;type=Internal,Antisense;utr_length=Internal_NA,Antisense_NA;associated_gene=OCPFDLNE_00825,OCPFDLNE_00826;libs=all;method=TSSpredator
CADEHJ010000001.1	ANNOgesic	TSS	849448	849448	.	+	.	Name=TSS:849448_f;ID=CADEHJ010000001.1_tss416;type=Primary,Antisense;utr_length=Primary_29,Antisense_NA;associated_gene=OCPFDLNE_00844,OCPFDLNE_00843;libs=all;method=TSSpredator
CADEHJ010000001.1	ANNOgesic	TSS	872561	872561	.	-	.	Name=TSS:872561_r;ID=CADEHJ010000001.1_tss435;type=Antisense;utr_length=Antisense_NA;associated_gene=OCPFDLNE_00867;libs=all;method=TSSpredator
CADEHJ010000001.1	ANNOgesic	TSS	884894	884894	.	+	.	Name=TSS:884894_f;ID=CADEHJ010000001.1_tss443;type=Primary,Antisense;utr_length=Primary_26,Antisense_NA;associated_gene=OCPFDLNE_00880,OCPFDLNE_00879;libs=all;method=TSSpredator
CADEHJ010000001.1	ANNOgesic	TSS	898966	898966	.	-	.	Name=TSS:898966_r;ID=CADEHJ010000001.1_tss449;type=Antisense;utr_length=Antisense_NA;associated_gene=OCPFDLNE_00888;libs=all;method=TSSpredator
CADEHJ010000001.1	ANNOgesic	TSS	901374	901374	.	+	.	Name=TSS:901374_f;ID=CADEHJ010000001.1_tss451;type=Primary,Antisense;utr_length=Primary_111,Antisense_NA;associated_gene=OCPFDLNE_00892,OCPFDLNE_00891;libs=all;method=TSSpredator
CADEHJ010000001.1	ANNOgesic	TSS	916598	916598	.	+	.	Name=TSS:916598_f;ID=CADEHJ010000001.1_tss455;type=Primary,Antisense;utr_length=Primary_26,Antisense_NA;associated_gene=OCPFDLNE_00899,OCPFDLNE_00898;libs=all;method=TSSpredator
CADEHJ010000001.1	ANNOgesic	TSS	943445	943445	.	+	.	Name=TSS:943445_f;ID=CADEHJ010000001.1_tss467;type=Primary,Antisense;utr_length=Primary_14,Antisense_NA;associated_gene=OCPFDLNE_00924,OCPFDLNE_00923;libs=all;method=TSSpredator
CADEHJ010000001.1	ANNOgesic	TSS	945244	945244	.	-	.	Name=TSS:945244_r;ID=CADEHJ010000001.1_tss468;type=Primary,Antisense;utr_length=Primary_74,Antisense_NA;associated_gene=OCPFDLNE_00926,OCPFDLNE_00927;libs=all;method=TSSpredator
CADEHJ010000001.1	ANNOgesic	TSS	963929	963929	.	-	.	Name=TSS:963929_r;ID=CADEHJ010000001.1_tss475;type=Antisense;utr_length=Antisense_NA;associated_gene=OCPFDLNE_00947;libs=all;method=TSSpredator
CADEHJ010000001.1	ANNOgesic	TSS	998722	998722	.	+	.	Name=TSS:998722_f;ID=CADEHJ010000001.1_tss497;type=Antisense;utr_length=Antisense_NA;associated_gene=OCPFDLNE_00987;libs=all;method=TSSpredator
CADEHJ010000001.1	ANNOgesic	TSS	1030739	1030739	.	-	.	Name=TSS:1030739_r;ID=CADEHJ010000001.1_tss526;type=Internal,Antisense;utr_length=Internal_NA,Antisense_NA;associated_gene=OCPFDLNE_01024,OCPFDLNE_01023;libs=all;method=TSSpredator
CADEHJ010000001.1	ANNOgesic	TSS	1039915	1039915	.	+	.	Name=TSS:1039915_f;ID=CADEHJ010000001.1_tss531;type=Antisense;utr_length=Antisense_NA;associated_gene=OCPFDLNE_01034;libs=all;method=TSSpredator
CADEHJ010000001.1	ANNOgesic	TSS	1041556	1041556	.	+	.	Name=TSS:1041556_f;ID=CADEHJ010000001.1_tss534;type=Internal,Antisense;utr_length=Internal_NA,Antisense_NA;associated_gene=OCPFDLNE_01036,OCPFDLNE_01037;libs=all;method=TSSpredator
CADEHJ010000001.1	ANNOgesic	TSS	1055865	1055865	.	-	.	Name=TSS:1055865_r;ID=CADEHJ010000001.1_tss543;type=Antisense;utr_length=Antisense_NA;associated_gene=OCPFDLNE_01052;libs=all;method=TSSpredator
CADEHJ010000001.1	ANNOgesic	TSS	1069058	1069058	.	+	.	Name=TSS:1069058_f;ID=CADEHJ010000001.1_tss554;type=Antisense;utr_length=Antisense_NA;associated_gene=OCPFDLNE_01065;libs=all;method=TSSpredator
CADEHJ010000001.1	ANNOgesic	TSS	1101059	1101059	.	-	.	Name=TSS:1101059_r;ID=CADEHJ010000001.1_tss576;type=Antisense;utr_length=Antisense_NA;associated_gene=OCPFDLNE_01098;libs=all;method=TSSpredator
CADEHJ010000001.1	ANNOgesic	TSS	1105750	1105750	.	-	.	Name=TSS:1105750_r;ID=CADEHJ010000001.1_tss579;type=Primary,Antisense;utr_length=Primary_27,Antisense_NA;associated_gene=OCPFDLNE_01103,OCPFDLNE_01104;libs=all;method=TSSpredator
CADEHJ010000001.1	ANNOgesic	TSS	1105806	1105806	.	+	.	Name=TSS:1105806_f;ID=CADEHJ010000001.1_tss580;type=Primary,Antisense;utr_length=Primary_22,Antisense_NA;associated_gene=OCPFDLNE_01104,OCPFDLNE_01103;libs=all;method=TSSpredator
CADEHJ010000001.1	ANNOgesic	TSS	1180916	1180916	.	+	.	Name=TSS:1180916_f;ID=CADEHJ010000001.1_tss610;type=Primary,Antisense;utr_length=Primary_32,Antisense_NA;associated_gene=OCPFDLNE_01178,OCPFDLNE_01177;libs=all;method=TSSpredator
CADEHJ010000001.1	ANNOgesic	TSS	1186491	1186491	.	-	.	Name=TSS:1186491_r;ID=CADEHJ010000001.1_tss613;type=Primary,Antisense;utr_length=Primary_22,Antisense_NA;associated_gene=OCPFDLNE_01184,OCPFDLNE_01185;libs=all;method=TSSpredator
CADEHJ010000001.1	ANNOgesic	TSS	1186536	1186536	.	+	.	Name=TSS:1186536_f;ID=CADEHJ010000001.1_tss614;type=Primary,Antisense;utr_length=Primary_25,Antisense_NA;associated_gene=OCPFDLNE_01185,OCPFDLNE_01184;libs=all;method=TSSpredator
CADEHJ010000001.1	ANNOgesic	TSS	1246756	1246756	.	-	.	Name=TSS:1246756_r;ID=CADEHJ010000001.1_tss626;type=Primary,Antisense;utr_length=Primary_25,Antisense_NA;associated_gene=OCPFDLNE_01255,OCPFDLNE_01256;libs=all;method=TSSpredator
CADEHJ010000001.1	ANNOgesic	TSS	1273024	1273024	.	-	.	Name=TSS:1273024_r;ID=CADEHJ010000001.1_tss640;type=Antisense;utr_length=Antisense_NA;associated_gene=OCPFDLNE_01278;libs=all;method=TSSpredator
CADEHJ010000001.1	ANNOgesic	TSS	1283664	1283664	.	-	.	Name=TSS:1283664_r;ID=CADEHJ010000001.1_tss650;type=Primary,Antisense;utr_length=Primary_25,Antisense_NA;associated_gene=OCPFDLNE_01290,OCPFDLNE_01291;libs=all;method=TSSpredator
CADEHJ010000001.1	ANNOgesic	TSS	1292743	1292743	.	+	.	Name=TSS:1292743_f;ID=CADEHJ010000001.1_tss660;type=Antisense;utr_length=Antisense_NA;associated_gene=OCPFDLNE_01302;libs=all;method=TSSpredator
CADEHJ010000001.1	ANNOgesic	TSS	1294160	1294160	.	-	.	Name=TSS:1294160_r;ID=CADEHJ010000001.1_tss661;type=Primary,Antisense;utr_length=Primary_39,Antisense_NA;associated_gene=OCPFDLNE_01302,OCPFDLNE_01303;libs=all;method=TSSpredator
CADEHJ010000001.1	ANNOgesic	TSS	1306513	1306513	.	-	.	Name=TSS:1306513_r;ID=CADEHJ010000001.1_tss670;type=Antisense;utr_length=Antisense_NA;associated_gene=OCPFDLNE_01316;libs=all;method=TSSpredator
CADEHJ010000001.1	ANNOgesic	TSS	1331403	1331403	.	+	.	Name=TSS:1331403_f;ID=CADEHJ010000001.1_tss685;type=Antisense;utr_length=Antisense_NA;associated_gene=OCPFDLNE_01338;libs=all;method=TSSpredator
CADEHJ010000001.1	ANNOgesic	TSS	1412489	1412489	.	-	.	Name=TSS:1412489_r;ID=CADEHJ010000001.1_tss725;type=Primary,Antisense;utr_length=Primary_36,Antisense_NA;associated_gene=OCPFDLNE_01422,OCPFDLNE_01423;libs=all;method=TSSpredator
CADEHJ010000001.1	ANNOgesic	TSS	1425257	1425257	.	+	.	Name=TSS:1425257_f;ID=CADEHJ010000001.1_tss734;type=Internal,Antisense;utr_length=Internal_NA,Antisense_NA;associated_gene=OCPFDLNE_01434,OCPFDLNE_01435;libs=all;method=TSSpredator
CADEHJ010000001.1	ANNOgesic	TSS	1468207	1468207	.	+	.	Name=TSS:1468207_f;ID=CADEHJ010000001.1_tss754;type=Antisense;utr_length=Antisense_NA;associated_gene=OCPFDLNE_01472;libs=all;method=TSSpredator
CADEHJ010000001.1	ANNOgesic	TSS	1474691	1474691	.	+	.	Name=TSS:1474691_f;ID=CADEHJ010000001.1_tss760;type=Primary,Antisense;utr_length=Primary_53,Antisense_NA;associated_gene=OCPFDLNE_01479,OCPFDLNE_01478;libs=all;method=TSSpredator
CADEHJ010000001.1	ANNOgesic	TSS	1481510	1481510	.	+	.	Name=TSS:1481510_f;ID=CADEHJ010000001.1_tss763;type=Antisense;utr_length=Antisense_NA;associated_gene=OCPFDLNE_01484;libs=all;method=TSSpredator
CADEHJ010000001.1	ANNOgesic	TSS	1486708	1486708	.	-	.	Name=TSS:1486708_r;ID=CADEHJ010000001.1_tss767;type=Secondary,Antisense;utr_length=Secondary_242,Antisense_NA;associated_gene=OCPFDLNE_01487,OCPFDLNE_01488;libs=all;method=TSSpredator
CADEHJ010000001.1	ANNOgesic	TSS	1496112	1496112	.	+	.	Name=TSS:1496112_f;ID=CADEHJ010000001.1_tss770;type=Antisense;utr_length=Antisense_NA;associated_gene=OCPFDLNE_01498;libs=all;method=TSSpredator
CADEHJ010000001.1	ANNOgesic	TSS	1516253	1516253	.	+	.	Name=TSS:1516253_f;ID=CADEHJ010000001.1_tss783;type=Antisense;utr_length=Antisense_NA;associated_gene=OCPFDLNE_01519;libs=all;method=TSSpredator
CADEHJ010000001.1	ANNOgesic	TSS	1536937	1536937	.	-	.	Name=TSS:1536937_r;ID=CADEHJ010000001.1_tss795;type=Secondary,Antisense;utr_length=Secondary_66,Antisense_NA;associated_gene=OCPFDLNE_01540,OCPFDLNE_01541;libs=all;method=TSSpredator
CADEHJ010000001.1	ANNOgesic	TSS	1550441	1550441	.	+	.	Name=TSS:1550441_f;ID=CADEHJ010000001.1_tss804;type=Secondary,Antisense;utr_length=Secondary_253,Antisense_NA;associated_gene=OCPFDLNE_01555,OCPFDLNE_01554;libs=all;method=TSSpredator
CADEHJ010000001.1	ANNOgesic	TSS	1597266	1597266	.	+	.	Name=TSS:1597266_f;ID=CADEHJ010000001.1_tss828;type=Antisense;utr_length=Antisense_NA;associated_gene=OCPFDLNE_01598;libs=all;method=TSSpredator
CADEHJ010000001.1	ANNOgesic	TSS	1633055	1633055	.	-	.	Name=TSS:1633055_r;ID=CADEHJ010000001.1_tss846;type=Secondary,Antisense;utr_length=Secondary_252,Antisense_NA;associated_gene=OCPFDLNE_01625,OCPFDLNE_01626;libs=all;method=TSSpredator
CADEHJ010000001.1	ANNOgesic	TSS	1675922	1675922	.	+	.	Name=TSS:1675922_f;ID=CADEHJ010000001.1_tss876;type=Primary,Antisense;utr_length=Primary_69,Antisense_NA;associated_gene=OCPFDLNE_01668,OCPFDLNE_01667;libs=all;method=TSSpredator
CADEHJ010000001.1	ANNOgesic	TSS	1675930	1675930	.	-	.	Name=TSS:1675930_r;ID=CADEHJ010000001.1_tss877;type=Primary,Antisense;utr_length=Primary_44,Antisense_NA;associated_gene=OCPFDLNE_01667,OCPFDLNE_01668;libs=all;method=TSSpredator
CADEHJ010000001.1	ANNOgesic	TSS	1707656	1707656	.	+	.	Name=TSS:1707656_f;ID=CADEHJ010000001.1_tss891;type=Primary,Antisense;utr_length=Primary_39,Antisense_NA;associated_gene=OCPFDLNE_01693,OCPFDLNE_01692;libs=all;method=TSSpredator
CADEHJ010000001.1	ANNOgesic	TSS	1708190	1708190	.	-	.	Name=TSS:1708190_r;ID=CADEHJ010000001.1_tss892;type=Antisense;utr_length=Antisense_NA;associated_gene=OCPFDLNE_01693;libs=all;method=TSSpredator
CADEHJ010000001.1	ANNOgesic	TSS	1720567	1720567	.	-	.	Name=TSS:1720567_r;ID=CADEHJ010000001.1_tss900;type=Antisense;utr_length=Antisense_NA;associated_gene=OCPFDLNE_01705;libs=all;method=TSSpredator
CADEHJ010000001.1	ANNOgesic	TSS	1736995	1736995	.	+	.	Name=TSS:1736995_f;ID=CADEHJ010000001.1_tss908;type=Primary,Antisense;utr_length=Primary_27,Antisense_NA;associated_gene=OCPFDLNE_01717,OCPFDLNE_01716;libs=all;method=TSSpredator
CADEHJ010000001.1	ANNOgesic	TSS	1737280	1737280	.	-	.	Name=TSS:1737280_r;ID=CADEHJ010000001.1_tss909;type=Antisense;utr_length=Antisense_NA;associated_gene=OCPFDLNE_01717;libs=all;method=TSSpredator
CADEHJ010000001.1	ANNOgesic	TSS	1742627	1742627	.	+	.	Name=TSS:1742627_f;ID=CADEHJ010000001.1_tss911;type=Antisense;utr_length=Antisense_NA;associated_gene=OCPFDLNE_01722;libs=all;method=TSSpredator
CADEHJ010000001.1	ANNOgesic	TSS	1767833	1767833	.	+	.	Name=TSS:1767833_f;ID=CADEHJ010000001.1_tss935;type=Secondary,Antisense;utr_length=Secondary_135,Antisense_NA;associated_gene=OCPFDLNE_01761,OCPFDLNE_01760;libs=all;method=TSSpredator
CADEHJ010000001.1	ANNOgesic	TSS	1767848	1767848	.	+	.	Name=TSS:1767848_f;ID=CADEHJ010000001.1_tss936;type=Primary,Antisense;utr_length=Primary_120,Antisense_NA;associated_gene=OCPFDLNE_01761,OCPFDLNE_01760;libs=all;method=TSSpredator
CADEHJ010000001.1	ANNOgesic	TSS	1770513	1770513	.	-	.	Name=TSS:1770513_r;ID=CADEHJ010000001.1_tss937;type=Primary,Antisense;utr_length=Primary_16,Antisense_NA;associated_gene=OCPFDLNE_01764,OCPFDLNE_01765;libs=all;method=TSSpredator
CADEHJ010000001.1	ANNOgesic	TSS	1770572	1770572	.	+	.	Name=TSS:1770572_f;ID=CADEHJ010000001.1_tss938;type=Primary,Antisense;utr_length=Primary_23,Antisense_NA;associated_gene=OCPFDLNE_01765,OCPFDLNE_01764;libs=all;method=TSSpredator
CADEHJ010000001.1	ANNOgesic	TSS	1780582	1780582	.	-	.	Name=TSS:1780582_r;ID=CADEHJ010000001.1_tss941;type=Primary,Antisense;utr_length=Primary_19,Antisense_NA;associated_gene=OCPFDLNE_01775,OCPFDLNE_01776;libs=all;method=TSSpredator
CADEHJ010000001.1	ANNOgesic	TSS	1780638	1780638	.	+	.	Name=TSS:1780638_f;ID=CADEHJ010000001.1_tss942;type=Primary,Antisense;utr_length=Primary_32,Antisense_NA;associated_gene=OCPFDLNE_01776,OCPFDLNE_01775;libs=all;method=TSSpredator
CADEHJ010000001.1	ANNOgesic	TSS	1781227	1781227	.	-	.	Name=TSS:1781227_r;ID=CADEHJ010000001.1_tss943;type=Antisense;utr_length=Antisense_NA;associated_gene=OCPFDLNE_01776;libs=all;method=TSSpredator
CADEHJ010000001.1	ANNOgesic	TSS	1782280	1782280	.	+	.	Name=TSS:1782280_f;ID=CADEHJ010000001.1_tss944;type=Primary,Antisense;utr_length=Primary_23,Antisense_NA;associated_gene=OCPFDLNE_01778,OCPFDLNE_01777;libs=all;method=TSSpredator
CADEHJ010000001.1	ANNOgesic	TSS	1817779	1817779	.	-	.	Name=TSS:1817779_r;ID=CADEHJ010000001.1_tss958;type=Primary,Antisense;utr_length=Primary_104,Antisense_NA;associated_gene=OCPFDLNE_01806,OCPFDLNE_01807;libs=all;method=TSSpredator
CADEHJ010000001.1	ANNOgesic	TSS	1848139	1848139	.	+	.	Name=TSS:1848139_f;ID=CADEHJ010000001.1_tss974;type=Antisense;utr_length=Antisense_NA;associated_gene=OCPFDLNE_01836;libs=all;method=TSSpredator
CADEHJ010000001.1	ANNOgesic	TSS	1868197	1868197	.	-	.	Name=TSS:1868197_r;ID=CADEHJ010000001.1_tss982;type=Antisense;utr_length=Antisense_NA;associated_gene=OCPFDLNE_01853;libs=all;method=TSSpredator
CADEHJ010000001.1	ANNOgesic	TSS	1870624	1870624	.	-	.	Name=TSS:1870624_r;ID=CADEHJ010000001.1_tss985;type=Primary,Antisense;utr_length=Primary_21,Antisense_NA;associated_gene=OCPFDLNE_01856,OCPFDLNE_01857;libs=all;method=TSSpredator
CADEHJ010000001.1	ANNOgesic	TSS	1870664	1870664	.	+	.	Name=TSS:1870664_f;ID=CADEHJ010000001.1_tss986;type=Primary,Antisense;utr_length=Primary_23,Antisense_NA;associated_gene=OCPFDLNE_01857,OCPFDLNE_01856;libs=all;method=TSSpredator
CADEHJ010000001.1	ANNOgesic	TSS	1875165	1875165	.	-	.	Name=TSS:1875165_r;ID=CADEHJ010000001.1_tss990;type=Primary,Antisense;utr_length=Primary_82,Antisense_NA;associated_gene=OCPFDLNE_01863,OCPFDLNE_01864;libs=all;method=TSSpredator
CADEHJ010000001.1	ANNOgesic	TSS	1917096	1917096	.	+	.	Name=TSS:1917096_f;ID=CADEHJ010000001.1_tss1010;type=Antisense;utr_length=Antisense_NA;associated_gene=OCPFDLNE_01904;libs=all;method=TSSpredator
CADEHJ010000001.1	ANNOgesic	TSS	1917855	1917855	.	-	.	Name=TSS:1917855_r;ID=CADEHJ010000001.1_tss1011;type=Primary,Antisense;utr_length=Primary_61,Antisense_NA;associated_gene=OCPFDLNE_01904,OCPFDLNE_01905;libs=all;method=TSSpredator
CADEHJ010000001.1	ANNOgesic	TSS	1932074	1932074	.	-	.	Name=TSS:1932074_r;ID=CADEHJ010000001.1_tss1014;type=Primary,Antisense;utr_length=Primary_139,Antisense_NA;associated_gene=OCPFDLNE_01916,OCPFDLNE_01917;libs=all;method=TSSpredator
CADEHJ010000001.1	ANNOgesic	TSS	1951676	1951676	.	-	.	Name=TSS:1951676_r;ID=CADEHJ010000001.1_tss1025;type=Secondary,Antisense;utr_length=Secondary_270,Antisense_NA;associated_gene=OCPFDLNE_01939,OCPFDLNE_01940;libs=all;method=TSSpredator
CADEHJ010000001.1	ANNOgesic	TSS	1977105	1977105	.	+	.	Name=TSS:1977105_f;ID=CADEHJ010000001.1_tss1044;type=Antisense;utr_length=Antisense_NA;associated_gene=OCPFDLNE_01965;libs=all;method=TSSpredator
CADEHJ010000001.1	ANNOgesic	TSS	1978241	1978241	.	-	.	Name=TSS:1978241_r;ID=CADEHJ010000001.1_tss1046;type=Antisense;utr_length=Antisense_NA;associated_gene=OCPFDLNE_01967;libs=all;method=TSSpredator
CADEHJ010000001.1	ANNOgesic	TSS	1982746	1982746	.	+	.	Name=TSS:1982746_f;ID=CADEHJ010000001.1_tss1048;type=Antisense;utr_length=Antisense_NA;associated_gene=OCPFDLNE_01971;libs=all;method=TSSpredator
CADEHJ010000001.1	ANNOgesic	TSS	1983189	1983189	.	+	.	Name=TSS:1983189_f;ID=CADEHJ010000001.1_tss1049;type=Antisense;utr_length=Antisense_NA;associated_gene=OCPFDLNE_01972;libs=all;method=TSSpredator
CADEHJ010000001.1	ANNOgesic	TSS	2029375	2029375	.	+	.	Name=TSS:2029375_f;ID=CADEHJ010000001.1_tss1071;type=Antisense;utr_length=Antisense_NA;associated_gene=OCPFDLNE_02016;libs=all;method=TSSpredator
CADEHJ010000001.1	ANNOgesic	TSS	2033327	2033327	.	-	.	Name=TSS:2033327_r;ID=CADEHJ010000001.1_tss1075;type=Secondary,Antisense;utr_length=Secondary_259,Antisense_NA;associated_gene=OCPFDLNE_02019,OCPFDLNE_02020;libs=all;method=TSSpredator
CADEHJ010000001.1	ANNOgesic	TSS	2124740	2124740	.	+	.	Name=TSS:2124740_f;ID=CADEHJ010000001.1_tss1117;type=Antisense;utr_length=Antisense_NA;associated_gene=OCPFDLNE_02106;libs=all;method=TSSpredator
CADEHJ010000001.1	ANNOgesic	TSS	2199950	2199950	.	+	.	Name=TSS:2199950_f;ID=CADEHJ010000001.1_tss1156;type=Primary,Antisense;utr_length=Primary_169,Antisense_NA;associated_gene=OCPFDLNE_02208,OCPFDLNE_02207;libs=all;method=TSSpredator
CADEHJ010000001.1	ANNOgesic	TSS	2200028	2200028	.	-	.	Name=TSS:2200028_r;ID=CADEHJ010000001.1_tss1157;type=Primary,Antisense;utr_length=Primary_159,Antisense_NA;associated_gene=OCPFDLNE_02207,OCPFDLNE_02208;libs=all;method=TSSpredator
CADEHJ010000001.1	ANNOgesic	TSS	2207812	2207812	.	+	.	Name=TSS:2207812_f;ID=CADEHJ010000001.1_tss1161;type=Antisense;utr_length=Antisense_NA;associated_gene=OCPFDLNE_02219;libs=all;method=TSSpredator
CADEHJ010000001.1	ANNOgesic	TSS	2221338	2221338	.	+	.	Name=TSS:2221338_f;ID=CADEHJ010000001.1_tss1163;type=Antisense;utr_length=Antisense_NA;associated_gene=OCPFDLNE_02235;libs=all;method=TSSpredator
CADEHJ010000001.1	ANNOgesic	TSS	2222895	2222895	.	+	.	Name=TSS:2222895_f;ID=CADEHJ010000001.1_tss1164;type=Antisense;utr_length=Antisense_NA;associated_gene=OCPFDLNE_02237;libs=all;method=TSSpredator
CADEHJ010000001.1	ANNOgesic	TSS	2236773	2236773	.	+	.	Name=TSS:2236773_f;ID=CADEHJ010000001.1_tss1172;type=Antisense;utr_length=Antisense_NA;associated_gene=OCPFDLNE_02249;libs=all;method=TSSpredator
CADEHJ010000001.1	ANNOgesic	TSS	2243045	2243045	.	-	.	Name=TSS:2243045_r;ID=CADEHJ010000001.1_tss1175;type=Primary,Antisense;utr_length=Primary_66,Antisense_NA;associated_gene=OCPFDLNE_02254,OCPFDLNE_02255;libs=all;method=TSSpredator
CADEHJ010000001.1	ANNOgesic	TSS	2243069	2243069	.	+	.	Name=TSS:2243069_f;ID=CADEHJ010000001.1_tss1176;type=Primary,Antisense;utr_length=Primary_36,Antisense_NA;associated_gene=OCPFDLNE_02255,OCPFDLNE_02254;libs=all;method=TSSpredator
CADEHJ010000001.1	ANNOgesic	TSS	2254058	2254058	.	-	.	Name=TSS:2254058_r;ID=CADEHJ010000001.1_tss1181;type=Primary,Antisense;utr_length=Primary_26,Antisense_NA;associated_gene=OCPFDLNE_02266,OCPFDLNE_02267;libs=all;method=TSSpredator
CADEHJ010000001.1	ANNOgesic	TSS	2259031	2259031	.	+	.	Name=TSS:2259031_f;ID=CADEHJ010000001.1_tss1185;type=Primary,Antisense;utr_length=Primary_12,Antisense_NA;associated_gene=OCPFDLNE_02272,OCPFDLNE_02271;libs=all;method=TSSpredator
CADEHJ010000001.1	ANNOgesic	TSS	2263897	2263897	.	+	.	Name=TSS:2263897_f;ID=CADEHJ010000001.1_tss1188;type=Antisense;utr_length=Antisense_NA;associated_gene=OCPFDLNE_02276;libs=all;method=TSSpredator
CADEHJ010000001.1	ANNOgesic	TSS	2274929	2274929	.	+	.	Name=TSS:2274929_f;ID=CADEHJ010000001.1_tss1196;type=Antisense;utr_length=Antisense_NA;associated_gene=OCPFDLNE_02285;libs=all;method=TSSpredator
CADEHJ010000001.1	ANNOgesic	TSS	2275704	2275704	.	+	.	Name=TSS:2275704_f;ID=CADEHJ010000001.1_tss1197;type=Antisense;utr_length=Antisense_NA;associated_gene=OCPFDLNE_02285;libs=all;method=TSSpredator
CADEHJ010000001.1	ANNOgesic	TSS	2276576	2276576	.	+	.	Name=TSS:2276576_f;ID=CADEHJ010000001.1_tss1198;type=Antisense;utr_length=Antisense_NA;associated_gene=OCPFDLNE_02285;libs=all;method=TSSpredator
CADEHJ010000001.1	ANNOgesic	TSS	2284281	2284281	.	+	.	Name=TSS:2284281_f;ID=CADEHJ010000001.1_tss1204;type=Antisense;utr_length=Antisense_NA;associated_gene=OCPFDLNE_02298;libs=all;method=TSSpredator
CADEHJ010000001.1	ANNOgesic	TSS	2293841	2293841	.	+	.	Name=TSS:2293841_f;ID=CADEHJ010000001.1_tss1210;type=Primary,Antisense;utr_length=Primary_21,Antisense_NA;associated_gene=OCPFDLNE_02307,OCPFDLNE_02306;libs=all;method=TSSpredator
CADEHJ010000001.1	ANNOgesic	TSS	2309563	2309563	.	+	.	Name=TSS:2309563_f;ID=CADEHJ010000001.1_tss1219;type=Antisense;utr_length=Antisense_NA;associated_gene=OCPFDLNE_02324;libs=all;method=TSSpredator
CADEHJ010000001.1	ANNOgesic	TSS	2367046	2367046	.	-	.	Name=TSS:2367046_r;ID=CADEHJ010000001.1_tss1255;type=Secondary,Antisense;utr_length=Secondary_274,Antisense_NA;associated_gene=OCPFDLNE_02375,OCPFDLNE_02376;libs=all;method=TSSpredator
CADEHJ010000001.1	ANNOgesic	TSS	2372487	2372487	.	+	.	Name=TSS:2372487_f;ID=CADEHJ010000001.1_tss1259;type=Antisense;utr_length=Antisense_NA;associated_gene=OCPFDLNE_02381;libs=all;method=TSSpredator
CADEHJ010000001.1	ANNOgesic	TSS	2375351	2375351	.	+	.	Name=TSS:2375351_f;ID=CADEHJ010000001.1_tss1262;type=Antisense;utr_length=Antisense_NA;associated_gene=OCPFDLNE_02384;libs=all;method=TSSpredator
CADEHJ010000001.1	ANNOgesic	TSS	2389147	2389147	.	-	.	Name=TSS:2389147_r;ID=CADEHJ010000001.1_tss1270;type=Antisense;utr_length=Antisense_NA;associated_gene=OCPFDLNE_02395;libs=all;method=TSSpredator
CADEHJ010000001.1	ANNOgesic	TSS	2411198	2411198	.	+	.	Name=TSS:2411198_f;ID=CADEHJ010000001.1_tss1284;type=Primary,Antisense;utr_length=Primary_63,Antisense_NA;associated_gene=OCPFDLNE_02422,OCPFDLNE_02421;libs=all;method=TSSpredator
CADEHJ010000001.1	ANNOgesic	TSS	2411199	2411199	.	-	.	Name=TSS:2411199_r;ID=CADEHJ010000001.1_tss1285;type=Primary,Antisense;utr_length=Primary_90,Antisense_NA;associated_gene=OCPFDLNE_02421,OCPFDLNE_02422;libs=all;method=TSSpredator
CADEHJ010000001.1	ANNOgesic	TSS	2422307	2422307	.	-	.	Name=TSS:2422307_r;ID=CADEHJ010000001.1_tss1288;type=Antisense;utr_length=Antisense_NA;associated_gene=OCPFDLNE_02429;libs=all;method=TSSpredator
CADEHJ010000001.1	ANNOgesic	TSS	2422456	2422456	.	-	.	Name=TSS:2422456_r;ID=CADEHJ010000001.1_tss1289;type=Antisense;utr_length=Antisense_NA;associated_gene=OCPFDLNE_02429;libs=all;method=TSSpredator
CADEHJ010000001.1	ANNOgesic	TSS	2429749	2429749	.	+	.	Name=TSS:2429749_f;ID=CADEHJ010000001.1_tss1294;type=Antisense;utr_length=Antisense_NA;associated_gene=OCPFDLNE_02436;libs=all;method=TSSpredator
CADEHJ010000001.1	ANNOgesic	TSS	2440510	2440510	.	+	.	Name=TSS:2440510_f;ID=CADEHJ010000001.1_tss1298;type=Antisense;utr_length=Antisense_NA;associated_gene=OCPFDLNE_02449;libs=all;method=TSSpredator
CADEHJ010000001.1	ANNOgesic	TSS	2447704	2447704	.	+	.	Name=TSS:2447704_f;ID=CADEHJ010000001.1_tss1301;type=Antisense;utr_length=Antisense_NA;associated_gene=OCPFDLNE_02455;libs=all;method=TSSpredator
CADEHJ010000001.1	ANNOgesic	TSS	2465610	2465610	.	+	.	Name=TSS:2465610_f;ID=CADEHJ010000001.1_tss1318;type=Antisense;utr_length=Antisense_NA;associated_gene=OCPFDLNE_02482;libs=all;method=TSSpredator
CADEHJ010000001.1	ANNOgesic	TSS	2472983	2472983	.	-	.	Name=TSS:2472983_r;ID=CADEHJ010000001.1_tss1324;type=Secondary,Antisense;utr_length=Secondary_169,Antisense_NA;associated_gene=OCPFDLNE_02490,OCPFDLNE_02491;libs=all;method=TSSpredator
CADEHJ010000001.1	ANNOgesic	TSS	2481026	2481026	.	-	.	Name=TSS:2481026_r;ID=CADEHJ010000001.1_tss1327;type=Primary,Antisense;utr_length=Primary_29,Antisense_NA;associated_gene=OCPFDLNE_02499,OCPFDLNE_02500;libs=all;method=TSSpredator
CADEHJ010000001.1	ANNOgesic	TSS	2481037	2481037	.	+	.	Name=TSS:2481037_f;ID=CADEHJ010000001.1_tss1328;type=Secondary,Antisense;utr_length=Secondary_88,Antisense_NA;associated_gene=OCPFDLNE_02500,OCPFDLNE_02499;libs=all;method=TSSpredator
CADEHJ010000001.1	ANNOgesic	TSS	2481203	2481203	.	-	.	Name=TSS:2481203_r;ID=CADEHJ010000001.1_tss1330;type=Secondary,Antisense;utr_length=Secondary_206,Antisense_NA;associated_gene=OCPFDLNE_02499,OCPFDLNE_02500;libs=all;method=TSSpredator
CADEHJ010000001.1	ANNOgesic	TSS	2507238	2507238	.	+	.	Name=TSS:2507238_f;ID=CADEHJ010000001.1_tss1349;type=Antisense;utr_length=Antisense_NA;associated_gene=OCPFDLNE_02527;libs=all;method=TSSpredator
CADEHJ010000001.1	ANNOgesic	TSS	2519560	2519560	.	-	.	Name=TSS:2519560_r;ID=CADEHJ010000001.1_tss1359;type=Antisense;utr_length=Antisense_NA;associated_gene=OCPFDLNE_02542;libs=all;method=TSSpredator
CADEHJ010000001.1	ANNOgesic	TSS	2521354	2521354	.	-	.	Name=TSS:2521354_r;ID=CADEHJ010000001.1_tss1360;type=Primary,Antisense;utr_length=Primary_34,Antisense_NA;associated_gene=OCPFDLNE_02543,OCPFDLNE_02544;libs=all;method=TSSpredator
CADEHJ010000001.1	ANNOgesic	TSS	2522856	2522856	.	-	.	Name=TSS:2522856_r;ID=CADEHJ010000001.1_tss1363;type=Secondary,Antisense;utr_length=Secondary_183,Antisense_NA;associated_gene=OCPFDLNE_02545,OCPFDLNE_02546;libs=all;method=TSSpredator
CADEHJ010000001.1	ANNOgesic	TSS	2523884	2523884	.	-	.	Name=TSS:2523884_r;ID=CADEHJ010000001.1_tss1365;type=Internal,Antisense;utr_length=Internal_NA,Antisense_NA;associated_gene=OCPFDLNE_02547,OCPFDLNE_02548;libs=all;method=TSSpredator
CADEHJ010000001.1	ANNOgesic	TSS	2523985	2523985	.	+	.	Name=TSS:2523985_f;ID=CADEHJ010000001.1_tss1366;type=Internal,Antisense;utr_length=Internal_NA,Antisense_NA;associated_gene=OCPFDLNE_02548,OCPFDLNE_02547;libs=all;method=TSSpredator
CADEHJ010000001.1	ANNOgesic	TSS	2563057	2563057	.	+	.	Name=TSS:2563057_f;ID=CADEHJ010000001.1_tss1392;type=Antisense;utr_length=Antisense_NA;associated_gene=OCPFDLNE_02586;libs=all;method=TSSpredator
CADEHJ010000001.1	ANNOgesic	TSS	2594002	2594002	.	+	.	Name=TSS:2594002_f;ID=CADEHJ010000001.1_tss1395;type=Antisense;utr_length=Antisense_NA;associated_gene=OCPFDLNE_02629;libs=all;method=TSSpredator
CADEHJ010000001.1	ANNOgesic	TSS	2595387	2595387	.	+	.	Name=TSS:2595387_f;ID=CADEHJ010000001.1_tss1396;type=Antisense;utr_length=Antisense_NA;associated_gene=OCPFDLNE_02633;libs=all;method=TSSpredator
CADEHJ010000001.1	ANNOgesic	TSS	2601439	2601439	.	-	.	Name=TSS:2601439_r;ID=CADEHJ010000001.1_tss1401;type=Secondary,Antisense;utr_length=Secondary_208,Antisense_NA;associated_gene=OCPFDLNE_02641,OCPFDLNE_02642;libs=all;method=TSSpredator
CADEHJ010000001.1	ANNOgesic	TSS	2637578	2637578	.	+	.	Name=TSS:2637578_f;ID=CADEHJ010000001.1_tss1415;type=Antisense;utr_length=Antisense_NA;associated_gene=OCPFDLNE_02676;libs=all;method=TSSpredator
CADEHJ010000001.1	ANNOgesic	TSS	2667347	2667347	.	+	.	Name=TSS:2667347_f;ID=CADEHJ010000001.1_tss1433;type=Antisense;utr_length=Antisense_NA;associated_gene=OCPFDLNE_02705;libs=all;method=TSSpredator
CADEHJ010000001.1	ANNOgesic	TSS	2686270	2686270	.	+	.	Name=TSS:2686270_f;ID=CADEHJ010000001.1_tss1443;type=Antisense;utr_length=Antisense_NA;associated_gene=OCPFDLNE_02726;libs=all;method=TSSpredator
CADEHJ010000001.1	ANNOgesic	TSS	2703103	2703103	.	+	.	Name=TSS:2703103_f;ID=CADEHJ010000001.1_tss1454;type=Primary,Antisense;utr_length=Primary_25,Antisense_NA;associated_gene=OCPFDLNE_02739,OCPFDLNE_02738;libs=all;method=TSSpredator
CADEHJ010000001.1	ANNOgesic	TSS	2709945	2709945	.	+	.	Name=TSS:2709945_f;ID=CADEHJ010000001.1_tss1459;type=Antisense;utr_length=Antisense_NA;associated_gene=OCPFDLNE_02748;libs=all;method=TSSpredator
CADEHJ010000001.1	ANNOgesic	TSS	2718074	2718074	.	+	.	Name=TSS:2718074_f;ID=CADEHJ010000001.1_tss1465;type=Secondary,Antisense;utr_length=Secondary_267,Antisense_NA;associated_gene=OCPFDLNE_02754,OCPFDLNE_02753;libs=all;method=TSSpredator
CADEHJ010000001.1	ANNOgesic	TSS	2718262	2718262	.	-	.	Name=TSS:2718262_r;ID=CADEHJ010000001.1_tss1466;type=Primary,Antisense;utr_length=Primary_36,Antisense_NA;associated_gene=OCPFDLNE_02753,OCPFDLNE_02754;libs=all;method=TSSpredator
CADEHJ010000001.1	ANNOgesic	TSS	2718322	2718322	.	+	.	Name=TSS:2718322_f;ID=CADEHJ010000001.1_tss1467;type=Primary,Antisense;utr_length=Primary_19,Antisense_NA;associated_gene=OCPFDLNE_02754,OCPFDLNE_02753;libs=all;method=TSSpredator
CADEHJ010000001.1	ANNOgesic	TSS	2734645	2734645	.	-	.	Name=TSS:2734645_r;ID=CADEHJ010000001.1_tss1475;type=Antisense;utr_length=Antisense_NA;associated_gene=OCPFDLNE_02772;libs=all;method=TSSpredator
CADEHJ010000001.1	ANNOgesic	TSS	2735954	2735954	.	+	.	Name=TSS:2735954_f;ID=CADEHJ010000001.1_tss1478;type=Antisense;utr_length=Antisense_NA;associated_gene=OCPFDLNE_02773;libs=all;method=TSSpredator
CADEHJ010000001.1	ANNOgesic	TSS	2755421	2755421	.	+	.	Name=TSS:2755421_f;ID=CADEHJ010000001.1_tss1480;type=Antisense;utr_length=Antisense_NA;associated_gene=OCPFDLNE_02795;libs=all;method=TSSpredator
CADEHJ010000001.1	ANNOgesic	TSS	2756656	2756656	.	+	.	Name=TSS:2756656_f;ID=CADEHJ010000001.1_tss1481;type=Antisense;utr_length=Antisense_NA;associated_gene=OCPFDLNE_02799;libs=all;method=TSSpredator
CADEHJ010000001.1	ANNOgesic	TSS	2762809	2762809	.	+	.	Name=TSS:2762809_f;ID=CADEHJ010000001.1_tss1482;type=Antisense;utr_length=Antisense_NA;associated_gene=OCPFDLNE_02812;libs=all;method=TSSpredator
CADEHJ010000001.1	ANNOgesic	TSS	2763657	2763657	.	+	.	Name=TSS:2763657_f;ID=CADEHJ010000001.1_tss1483;type=Antisense;utr_length=Antisense_NA;associated_gene=OCPFDLNE_02816;libs=all;method=TSSpredator
CADEHJ010000001.1	ANNOgesic	TSS	2764152	2764152	.	+	.	Name=TSS:2764152_f;ID=CADEHJ010000001.1_tss1484;type=Antisense;utr_length=Antisense_NA;associated_gene=OCPFDLNE_02817;libs=all;method=TSSpredator
CADEHJ010000001.1	ANNOgesic	TSS	2765030	2765030	.	+	.	Name=TSS:2765030_f;ID=CADEHJ010000001.1_tss1485;type=Primary,Antisense;utr_length=Primary_17,Antisense_NA;associated_gene=OCPFDLNE_02819,OCPFDLNE_02818;libs=all;method=TSSpredator
CADEHJ010000001.1	ANNOgesic	TSS	2766202	2766202	.	+	.	Name=TSS:2766202_f;ID=CADEHJ010000001.1_tss1486;type=Primary,Antisense;utr_length=Primary_16,Antisense_NA;associated_gene=OCPFDLNE_02822,OCPFDLNE_02821;libs=all;method=TSSpredator
CADEHJ010000001.1	ANNOgesic	TSS	2794573	2794573	.	+	.	Name=TSS:2794573_f;ID=CADEHJ010000001.1_tss1505;type=Primary,Antisense;utr_length=Primary_18,Antisense_NA;associated_gene=OCPFDLNE_02857,OCPFDLNE_02856;libs=all;method=TSSpredator
CADEHJ010000001.1	ANNOgesic	TSS	2797336	2797336	.	+	.	Name=TSS:2797336_f;ID=CADEHJ010000001.1_tss1507;type=Antisense;utr_length=Antisense_NA;associated_gene=OCPFDLNE_02859;libs=all;method=TSSpredator
CADEHJ010000001.1	ANNOgesic	TSS	2801537	2801537	.	+	.	Name=TSS:2801537_f;ID=CADEHJ010000001.1_tss1510;type=Antisense;utr_length=Antisense_NA;associated_gene=OCPFDLNE_02867;libs=all;method=TSSpredator
CADEHJ010000001.1	ANNOgesic	TSS	2842385	2842385	.	+	.	Name=TSS:2842385_f;ID=CADEHJ010000001.1_tss1527;type=Antisense;utr_length=Antisense_NA;associated_gene=OCPFDLNE_02917;libs=all;method=TSSpredator
CADEHJ010000001.1	ANNOgesic	TSS	2851736	2851736	.	-	.	Name=TSS:2851736_r;ID=CADEHJ010000001.1_tss1531;type=Primary,Antisense;utr_length=Primary_17,Antisense_NA;associated_gene=OCPFDLNE_02927,OCPFDLNE_02928;libs=all;method=TSSpredator
CADEHJ010000001.1	ANNOgesic	TSS	2851804	2851804	.	+	.	Name=TSS:2851804_f;ID=CADEHJ010000001.1_tss1532;type=Primary,Antisense;utr_length=Primary_31,Antisense_NA;associated_gene=OCPFDLNE_02928,OCPFDLNE_02927;libs=all;method=TSSpredator
CADEHJ010000001.1	ANNOgesic	TSS	2877473	2877473	.	+	.	Name=TSS:2877473_f;ID=CADEHJ010000001.1_tss1546;type=Secondary,Antisense;utr_length=Secondary_74,Antisense_NA;associated_gene=OCPFDLNE_02952,OCPFDLNE_02951;libs=all;method=TSSpredator
CADEHJ010000001.1	ANNOgesic	TSS	2903737	2903737	.	+	.	Name=TSS:2903737_f;ID=CADEHJ010000001.1_tss1566;type=Primary,Antisense;utr_length=Primary_26,Antisense_NA;associated_gene=OCPFDLNE_02979,OCPFDLNE_02978;libs=all;method=TSSpredator
CADEHJ010000001.1	ANNOgesic	TSS	2907384	2907384	.	-	.	Name=TSS:2907384_r;ID=CADEHJ010000001.1_tss1568;type=Primary,Antisense;utr_length=Primary_52,Antisense_NA;associated_gene=OCPFDLNE_02983,OCPFDLNE_02984;libs=all;method=TSSpredator
CADEHJ010000001.1	ANNOgesic	TSS	2910845	2910845	.	+	.	Name=TSS:2910845_f;ID=CADEHJ010000001.1_tss1570;type=Antisense;utr_length=Antisense_NA;associated_gene=OCPFDLNE_02989;libs=all;method=TSSpredator
CADEHJ010000001.1	ANNOgesic	TSS	2915856	2915856	.	-	.	Name=TSS:2915856_r;ID=CADEHJ010000001.1_tss1573;type=Antisense;utr_length=Antisense_NA;associated_gene=OCPFDLNE_02992;libs=all;method=TSSpredator
CADEHJ010000001.1	ANNOgesic	TSS	2916297	2916297	.	-	.	Name=TSS:2916297_r;ID=CADEHJ010000001.1_tss1574;type=Antisense;utr_length=Antisense_NA;associated_gene=OCPFDLNE_02993;libs=all;method=TSSpredator
CADEHJ010000001.1	ANNOgesic	TSS	2922805	2922805	.	+	.	Name=TSS:2922805_f;ID=CADEHJ010000001.1_tss1577;type=Antisense;utr_length=Antisense_NA;associated_gene=OCPFDLNE_02999;libs=all;method=TSSpredator
CADEHJ010000001.1	ANNOgesic	TSS	2923926	2923926	.	+	.	Name=TSS:2923926_f;ID=CADEHJ010000001.1_tss1579;type=Antisense;utr_length=Antisense_NA;associated_gene=OCPFDLNE_03000;libs=all;method=TSSpredator
CADEHJ010000001.1	ANNOgesic	TSS	2954399	2954399	.	+	.	Name=TSS:2954399_f;ID=CADEHJ010000001.1_tss1594;type=Antisense;utr_length=Antisense_NA;associated_gene=OCPFDLNE_03027;libs=all;method=TSSpredator
CADEHJ010000001.1	ANNOgesic	TSS	2957036	2957036	.	-	.	Name=TSS:2957036_r;ID=CADEHJ010000001.1_tss1598;type=Antisense;utr_length=Antisense_NA;associated_gene=OCPFDLNE_03029;libs=all;method=TSSpredator
CADEHJ010000001.1	ANNOgesic	TSS	2972533	2972533	.	+	.	Name=TSS:2972533_f;ID=CADEHJ010000001.1_tss1603;type=Antisense;utr_length=Antisense_NA;associated_gene=OCPFDLNE_03042;libs=all;method=TSSpredator
CADEHJ010000001.1	ANNOgesic	TSS	3001722	3001722	.	+	.	Name=TSS:3001722_f;ID=CADEHJ010000001.1_tss1619;type=Antisense;utr_length=Antisense_NA;associated_gene=OCPFDLNE_03069;libs=all;method=TSSpredator
CADEHJ010000001.1	ANNOgesic	TSS	3028281	3028281	.	+	.	Name=TSS:3028281_f;ID=CADEHJ010000001.1_tss1630;type=Antisense;utr_length=Antisense_NA;associated_gene=OCPFDLNE_03093;libs=all;method=TSSpredator
CADEHJ010000001.1	ANNOgesic	TSS	3037628	3037628	.	-	.	Name=TSS:3037628_r;ID=CADEHJ010000001.1_tss1634;type=Primary,Antisense;utr_length=Primary_36,Antisense_NA;associated_gene=OCPFDLNE_03100,OCPFDLNE_03101;libs=all;method=TSSpredator
CADEHJ010000001.1	ANNOgesic	TSS	3037688	3037688	.	+	.	Name=TSS:3037688_f;ID=CADEHJ010000001.1_tss1635;type=Primary,Antisense;utr_length=Primary_27,Antisense_NA;associated_gene=OCPFDLNE_03101,OCPFDLNE_03100;libs=all;method=TSSpredator

## Sheet: Match_RO15vsEGD-e_lifted
The list of antisense TSS that were seen both in ANNOgesic prediction and EGD-e RO15 lifted list
ANNOgesic annotation:
##gff-version 3
CADEHJ010000001.1	ANNOgesic	TSS	175993	175993	.	+	.	Name=TSS:175993_f;ID=CADEHJ010000001.1_tss75;type=Antisense;utr_length=Antisense_NA;associated_gene=OCPFDLNE_00177;libs=all;method=TSSpredator
CADEHJ010000001.1	ANNOgesic	TSS	522918	522918	.	-	.	Name=TSS:522918_r;ID=CADEHJ010000001.1_tss265;type=Antisense;utr_length=Antisense_NA;associated_gene=OCPFDLNE_00505;libs=all;method=TSSpredator
CADEHJ010000001.1	ANNOgesic	TSS	639970	639970	.	+	.	Name=TSS:639970_f;ID=CADEHJ010000001.1_tss325;type=Antisense;utr_length=Antisense_NA;associated_gene=OCPFDLNE_00612;libs=all;method=TSSpredator
CADEHJ010000001.1	ANNOgesic	TSS	719617	719617	.	+	.	Name=TSS:719617_f;ID=CADEHJ010000001.1_tss358;type=Antisense;utr_length=Antisense_NA;associated_gene=OCPFDLNE_00701;libs=all;method=TSSpredator
CADEHJ010000001.1	ANNOgesic	TSS	742535	742535	.	-	.	Name=TSS:742535_r;ID=CADEHJ010000001.1_tss379;type=Antisense;utr_length=Antisense_NA;associated_gene=OCPFDLNE_00732;libs=all;method=TSSpredator
CADEHJ010000001.1	ANNOgesic	TSS	1069058	1069058	.	+	.	Name=TSS:1069058_f;ID=CADEHJ010000001.1_tss554;type=Antisense;utr_length=Antisense_NA;associated_gene=OCPFDLNE_01065;libs=all;method=TSSpredator
CADEHJ010000001.1	ANNOgesic	TSS	1292743	1292743	.	+	.	Name=TSS:1292743_f;ID=CADEHJ010000001.1_tss660;type=Antisense;utr_length=Antisense_NA;associated_gene=OCPFDLNE_01302;libs=all;method=TSSpredator
CADEHJ010000001.1	ANNOgesic	TSS	1737280	1737280	.	-	.	Name=TSS:1737280_r;ID=CADEHJ010000001.1_tss909;type=Antisense;utr_length=Antisense_NA;associated_gene=OCPFDLNE_01717;libs=all;method=TSSpredator
CADEHJ010000001.1	ANNOgesic	TSS	2236773	2236773	.	+	.	Name=TSS:2236773_f;ID=CADEHJ010000001.1_tss1172;type=Antisense;utr_length=Antisense_NA;associated_gene=OCPFDLNE_02249;libs=all;method=TSSpredator
CADEHJ010000001.1	ANNOgesic	TSS	2422307	2422307	.	-	.	Name=TSS:2422307_r;ID=CADEHJ010000001.1_tss1288;type=Antisense;utr_length=Antisense_NA;associated_gene=OCPFDLNE_02429;libs=all;method=TSSpredator
Lifted TSS annotation:
##gff-version 3
CADEHJ010000001.1	CrossMap	asRNA	175993	175993	.	+	.	Name=anti0172 / rli23
CADEHJ010000001.1	CrossMap	asRNA	522918	522918	.	-	.	Name=anti0506 / rli30
CADEHJ010000001.1	CrossMap	asRNA	639970	639970	.	+	.	Name=anti0605
CADEHJ010000001.1	CrossMap	asRNA	719617	719617	.	+	.	Name=anti0647-1
CADEHJ010000001.1	CrossMap	asRNA	742535	742535	.	-	.	Name=anti0675-677
CADEHJ010000001.1	CrossMap	asRNA	1069058	1069058	.	+	.	Name=anti0828 / rli35
CADEHJ010000001.1	CrossMap	asRNA	1292743	1292743	.	+	.	Name=anti1255
CADEHJ010000001.1	CrossMap	asRNA	1737280	1737280	.	-	.	Name=anti1670
CADEHJ010000001.1	CrossMap	asRNA	2236773	2236773	.	+	.	Name=anti2095 / rli65
CADEHJ010000001.1	CrossMap	asRNA	2422307	2422307	.	-	.	Name=anti2270

## Sheet: RO15_asRNA_ANNOgesic
RO15 asRNA prediction using ANNOgesic tool
Genome	Name	Start	End	Strand	Start_with_TSS/Cleavage_site	End_with_cleavage	Normalized_secondary_energy_change(by_length)	sRNA_types	sRNA_hit|e-value|score	Overlap_CDS_forward	Overlap_nts_forward	Overlap_CDS_reverse	Overlap_nts_reverse	End_with_terminator	sRNA_length	Avg_coverage:rna_reads_forward/rna_reads_reverse	Avg_coverage:tss_reads_forward/tss_reads_reverse
CADEHJ010000001.1	sRNA_00122	2764152	2764232	+	TSS:2764152_+	NA	-0.4481	Antisense	NA	NA	NA	CAB3280857.1	26(32%)	NA	80	Not_detect	1919.96
CADEHJ010000001.1	SsrA	2527370	2527653	+	NA	NA	-0.2479	Antisense	slmo2510.1|Listeria monocytogenes EGD-e|SsrA|6e-148|514	NA	NA	rna-OCPFDLNE_02553	284(100%)	NA	283	741.274	Not_detect
CADEHJ010000001.1	sRNA_00078	1978152	1978241	-	TSS:1978241_-	NA	-0.2278	Antisense	NA	CAB3280033.1	90(100%)	NA	NA	NA	89	Not_detect	216.645
CADEHJ010000001.1	sRNA_00019	522855	522918	-	TSS:522918_-	NA	-0.25	Antisense	NA	CAB3278606.1	64(100%)	NA	NA	NA	63	Not_detect	98.6914
CADEHJ010000001.1	sRNA_00112	2595387	2595454	+	TSS:2595387_+	NA	-0.3235	Antisense	NA	NA	NA	CAB3280674.1	13(19%)	NA	67	Not_detect	79.9987
CADEHJ010000001.1	sRNA_00073	1737222	1737280	-	TSS:1737280_-	NA	-0.1508	Antisense	NA	CAB3279811.1	59(100%)	NA	NA	terminator:1737232-1737266_-	58	Not_detect	45.8532
