# Supplementary material for: RNA editing, RNA modifications, and transcriptional units in Listeria monocytogenes
Source: Research Square preprint supplement (doi:10.21203/rs.3.rs-1530110/v1), 2022-04-21
Supplement: Supplementary file 13 [file 5520b6fbcbe9963a79ac036a.xlsx]

## Sheet: RO15
Table S7. Complete list of A-G variant positions in both RO15 and ScottA. Sheets 2 and 4 include all samples in which an A-G variant was observed. Total coverage of the position, variant coverage, and percentage of variant are shown. Each position is separated by a blank line. Samples not shown in the table do not have any variant in that position.
Variant Pos.	Locus Tag	Gene Name	Ref.	Variant	Number of treated sample variant seen	Number of control sample variant seen
204136	OCPFDLNE_00200	spoVG_1	A	G	9	1
322606	OCPFDLNE_00309	walR	A	G	5	0
429958	OCPFDLNE_00419	mngB_1	A	G	8	0
497744	OCPFDLNE_00478	dhaS	A	G	12	0
573660	OCPFDLNE_00547	pbpX	A	G	6	0
843039	OCPFDLNE_00840	cycA	A	G	2	1
1213571	OCPFDLNE_01217	pdtaS	A	G	9	3
1240312	OCPFDLNE_01246	cbiK	A	G	3	1
1286587	OCPFDLNE_01295	mdtG	T	C	4	0
1451307	OCPFDLNE_01455	pflA	A	G	51	47
1544500	OCPFDLNE_01549		T	C	9	0
1637322	OCPFDLNE_01630		T	C	3	0
1768810	OCPFDLNE_01761	yfhP	A	G	10	0
1801548	OCPFDLNE_01798	iolU_2	T	C	7	0
1827544	OCPFDLNE_01817	graR	T	C	2	1
1951882	OCPFDLNE_01940		A	G	3	0
2039351	OCPFDLNE_02027	scpA	T	C	3	0
2170275	OCPFDLNE_02153	rimI	T	C	5	3
2239766	OCPFDLNE_02253	licR_5	T	C	3	0
2269171	OCPFDLNE_02280	mdxE	T	C	37	10
2298917	OCPFDLNE_02315	nrdE	T	C	5	0
2428075	OCPFDLNE_02434	pepC	A	G	8	1
2467402	OCPFDLNE_02484	patB	A	G	7	0
2485029	OCPFDLNE_02503		T	C	7	1
2607196	OCPFDLNE_02647		T	C	3	0
2646986	OCPFDLNE_02684	secA	T	C	26	14
2649787	OCPFDLNE_02685	hpf	T	C	21	1
2760956	OCPFDLNE_02809		T	C	6	2
2857805	OCPFDLNE_02934	kdpD	T	C	5	5
3016678	OCPFDLNE_03082	garK_2	T	C	3	0
2288303	sRNA_92	rli47	A	G	8	1

## Sheet: RO15_samples_with_variants
sample ID	position	Ref	Alt	total coverage	variant coverage	percentage	condition	timepoint	locus_tag	gene name
R_009	1213571	A	G	7	3	42.8571	treatment_200	T2	OCPFDLNE_01217	pdtaS
R_066	1213571	A	G	3	2	66.6667	treatment_200	T7	OCPFDLNE_01217	pdtaS
R_087	1213571	A	G	6	5	83.3333	treatment_200	T9	OCPFDLNE_01217	pdtaS
R_093	1213571	A	G	6	2	33.3333	treatment_400	T2	OCPFDLNE_01217	pdtaS
R_115	1213571	A	G	7	2	28.5714	treatment_400	T3	OCPFDLNE_01217	pdtaS
R_118	1213571	A	G	7	2	28.5714	treatment_400	T4	OCPFDLNE_01217	pdtaS
R_137	1213571	A	G	8	2	25	treatment_400	T6	OCPFDLNE_01217	pdtaS
R_169	1213571	A	G	7	2	28.5714	treatment_400	T9	OCPFDLNE_01217	pdtaS
R_173	1213571	A	G	5	2	40	treatment_400	T8	OCPFDLNE_01217	pdtaS
R_185	1213571	A	G	15	5	33.3333	control_200	T2	OCPFDLNE_01217	pdtaS
R_242	1213571	A	G	9	4	44.4444	control_200	T9	OCPFDLNE_01217	pdtaS
R_243	1213571	A	G	7	3	42.8571	control_200	T9	OCPFDLNE_01217	pdtaS
R_085	1240312	A	G	5	2	40	treatment_200	T8	OCPFDLNE_01246	cbiK
R_087	1240312	A	G	9	2	22.2222	treatment_200	T9	OCPFDLNE_01246	cbiK
R_159	1240312	A	G	17	3	17.6471	treatment_400	T7	OCPFDLNE_01246	cbiK
R_271	1240312	A	G	5	2	40	control_400	T3	OCPFDLNE_01246	cbiK
R_053	1286587	T	C	10	2	20	treatment_200	T5	OCPFDLNE_01295	mdtG
R_085	1286587	T	C	7	2	28.5714	treatment_200	T8	OCPFDLNE_01295	mdtG
R_087	1286587	T	C	12	2	16.6667	treatment_200	T9	OCPFDLNE_01295	mdtG
R_113	1286587	T	C	4	2	50	treatment_400	T4	OCPFDLNE_01295	mdtG
R_001	1451307	A	G	111	73	65.7658	treatment_200	T1	OCPFDLNE_01455	pflA
R_009	1451307	A	G	94	48	51.0638	treatment_200	T2	OCPFDLNE_01455	pflA
R_010	1451307	A	G	51	37	72.549	treatment_200	T2	OCPFDLNE_01455	pflA
R_013	1451307	A	G	50	32	64	treatment_200	T1	OCPFDLNE_01455	pflA
R_015	1451307	A	G	34	23	67.6471	treatment_200	T2	OCPFDLNE_01455	pflA
R_017	1451307	A	G	96	63	65.625	treatment_200	T1	OCPFDLNE_01455	pflA
R_021	1451307	A	G	38	18	47.3684	treatment_200	T3	OCPFDLNE_01455	pflA
R_025	1451307	A	G	66	27	40.9091	treatment_200	T4	OCPFDLNE_01455	pflA
R_030	1451307	A	G	44	25	56.8182	treatment_200	T4	OCPFDLNE_01455	pflA
R_033	1451307	A	G	56	22	39.2857	treatment_200	T3	OCPFDLNE_01455	pflA
R_035	1451307	A	G	38	19	50	treatment_200	T4	OCPFDLNE_01455	pflA
R_037	1451307	A	G	75	38	50.6667	treatment_200	T3	OCPFDLNE_01455	pflA
R_041	1451307	A	G	102	28	27.451	treatment_200	T5	OCPFDLNE_01455	pflA
R_047	1451307	A	G	58	25	43.1034	treatment_200	T5	OCPFDLNE_01455	pflA
R_050	1451307	A	G	102	30	29.4118	treatment_200	T6	OCPFDLNE_01455	pflA
R_053	1451307	A	G	46	16	34.7826	treatment_200	T5	OCPFDLNE_01455	pflA
R_066	1451307	A	G	64	44	68.75	treatment_200	T7	OCPFDLNE_01455	pflA
R_069	1451307	A	G	42	27	64.2857	treatment_200	T8	OCPFDLNE_01455	pflA
R_071	1451307	A	G	63	44	69.8413	treatment_200	T7	OCPFDLNE_01455	pflA
R_073	1451307	A	G	38	24	63.1579	treatment_200	T8	OCPFDLNE_01455	pflA
R_081	1451307	A	G	72	53	73.6111	treatment_200	T9	OCPFDLNE_01455	pflA
R_083	1451307	A	G	83	52	62.6506	treatment_200	T7	OCPFDLNE_01455	pflA
R_085	1451307	A	G	49	37	75.5102	treatment_200	T8	OCPFDLNE_01455	pflA
R_087	1451307	A	G	74	60	81.0811	treatment_200	T9	OCPFDLNE_01455	pflA
R_090	1451307	A	G	85	42	49.4118	treatment_400	T1	OCPFDLNE_01455	pflA
R_093	1451307	A	G	39	22	56.4103	treatment_400	T2	OCPFDLNE_01455	pflA
R_095	1451307	A	G	44	17	38.6364	treatment_400	T1	OCPFDLNE_01455	pflA
R_097	1451307	A	G	41	21	51.2195	treatment_400	T2	OCPFDLNE_01455	pflA
R_098	1451307	A	G	73	31	42.4658	treatment_400	T2	OCPFDLNE_01455	pflA
R_101	1451307	A	G	100	46	46	treatment_400	T1	OCPFDLNE_01455	pflA
R_110	1451307	A	G	49	25	51.0204	treatment_400	T3	OCPFDLNE_01455	pflA
R_113	1451307	A	G	45	21	46.6667	treatment_400	T4	OCPFDLNE_01455	pflA
R_115	1451307	A	G	59	28	47.4576	treatment_400	T3	OCPFDLNE_01455	pflA
R_118	1451307	A	G	48	26	54.1667	treatment_400	T4	OCPFDLNE_01455	pflA
R_121	1451307	A	G	59	30	50.8475	treatment_400	T3	OCPFDLNE_01455	pflA
R_127	1451307	A	G	38	21	55.2632	treatment_400	T4	OCPFDLNE_01455	pflA
R_130	1451307	A	G	51	33	64.7059	treatment_400	T5	OCPFDLNE_01455	pflA
R_133	1451307	A	G	52	24	46.1538	treatment_400	T6	OCPFDLNE_01455	pflA
R_135	1451307	A	G	36	20	55.5556	treatment_400	T5	OCPFDLNE_01455	pflA
R_137	1451307	A	G	56	34	60.7143	treatment_400	T6	OCPFDLNE_01455	pflA
R_145	1451307	A	G	47	36	76.5957	treatment_400	T9	OCPFDLNE_01455	pflA
R_147	1451307	A	G	47	21	44.6809	treatment_400	T5	OCPFDLNE_01455	pflA
R_149	1451307	A	G	27	15	55.5556	treatment_400	T6	OCPFDLNE_01455	pflA
R_151	1451307	A	G	38	26	68.4211	treatment_400	T9	OCPFDLNE_01455	pflA
R_154	1451307	A	G	77	46	59.7403	treatment_400	T7	OCPFDLNE_01455	pflA
R_157	1451307	A	G	35	30	85.7143	treatment_400	T8	OCPFDLNE_01455	pflA
R_159	1451307	A	G	40	29	72.5	treatment_400	T7	OCPFDLNE_01455	pflA
R_161	1451307	A	G	30	25	83.3333	treatment_400	T8	OCPFDLNE_01455	pflA
R_165	1451307	A	G	45	32	71.1111	treatment_400	T7	OCPFDLNE_01455	pflA
R_169	1451307	A	G	45	34	75.5556	treatment_400	T9	OCPFDLNE_01455	pflA
R_173	1451307	A	G	61	48	78.6885	treatment_400	T8	OCPFDLNE_01455	pflA
R_177	1451307	A	G	85	32	37.6471	control_200	T1	OCPFDLNE_01455	pflA
R_178	1451307	A	G	148	60	40.5405	control_200	T1	OCPFDLNE_01455	pflA
R_179	1451307	A	G	185	63	34.0541	control_200	T1	OCPFDLNE_01455	pflA
R_185	1451307	A	G	60	22	36.6667	control_200	T2	OCPFDLNE_01455	pflA
R_186	1451307	A	G	80	33	41.25	control_200	T2	OCPFDLNE_01455	pflA
R_188	1451307	A	G	82	18	21.9512	control_200	T2	OCPFDLNE_01455	pflA
R_193	1451307	A	G	46	14	30.4348	control_200	T3	OCPFDLNE_01455	pflA
R_194	1451307	A	G	73	27	36.9863	control_200	T3	OCPFDLNE_01455	pflA
R_196	1451307	A	G	37	10	27.027	control_200	T3	OCPFDLNE_01455	pflA
R_201	1451307	A	G	28	6	21.4286	control_200	T4	OCPFDLNE_01455	pflA
R_203	1451307	A	G	15	5	33.3333	control_200	T4	OCPFDLNE_01455	pflA
R_204	1451307	A	G	35	8	22.8571	control_200	T4	OCPFDLNE_01455	pflA
R_209	1451307	A	G	58	12	20.6897	control_200	T5	OCPFDLNE_01455	pflA
R_210	1451307	A	G	30	10	33.3333	control_200	T5	OCPFDLNE_01455	pflA
R_212	1451307	A	G	9	2	22.2222	control_200	T5	OCPFDLNE_01455	pflA
R_218	1451307	A	G	19	5	26.3158	control_200	T6	OCPFDLNE_01455	pflA
R_220	1451307	A	G	53	8	15.0943	control_200	T6	OCPFDLNE_01455	pflA
R_225	1451307	A	G	22	4	18.1818	control_200	T7	OCPFDLNE_01455	pflA
R_226	1451307	A	G	11	5	45.4545	control_200	T7	OCPFDLNE_01455	pflA
R_228	1451307	A	G	40	13	32.5	control_200	T7	OCPFDLNE_01455	pflA
R_234	1451307	A	G	8	4	50	control_200	T8	OCPFDLNE_01455	pflA
R_242	1451307	A	G	5	4	80	control_200	T9	OCPFDLNE_01455	pflA
R_243	1451307	A	G	10	6	60	control_200	T9	OCPFDLNE_01455	pflA
R_250	1451307	A	G	94	33	35.1064	control_400	T1	OCPFDLNE_01455	pflA
R_251	1451307	A	G	37	17	45.9459	control_400	T1	OCPFDLNE_01455	pflA
R_252	1451307	A	G	46	15	32.6087	control_400	T1	OCPFDLNE_01455	pflA
R_259	1451307	A	G	37	14	37.8378	control_400	T2	OCPFDLNE_01455	pflA
R_261	1451307	A	G	25	9	36	control_400	T2	OCPFDLNE_01455	pflA
R_262	1451307	A	G	56	24	42.8571	control_400	T2	OCPFDLNE_01455	pflA
R_269	1451307	A	G	27	8	29.6296	control_400	T3	OCPFDLNE_01455	pflA
R_271	1451307	A	G	40	14	35	control_400	T3	OCPFDLNE_01455	pflA
R_272	1451307	A	G	43	15	34.8837	control_400	T3	OCPFDLNE_01455	pflA
R_280	1451307	A	G	8	4	50	control_400	T4	OCPFDLNE_01455	pflA
R_281	1451307	A	G	26	8	30.7692	control_400	T4	OCPFDLNE_01455	pflA
R_287	1451307	A	G	14	7	50	control_400	T5	OCPFDLNE_01455	pflA
R_294	1451307	A	G	34	8	23.5294	control_400	T6	OCPFDLNE_01455	pflA
R_295	1451307	A	G	79	23	29.1139	control_400	T6	OCPFDLNE_01455	pflA
R_296	1451307	A	G	81	20	24.6914	control_400	T6	OCPFDLNE_01455	pflA
R_302	1451307	A	G	28	5	17.8571	control_400	T7	OCPFDLNE_01455	pflA
R_303	1451307	A	G	26	9	34.6154	control_400	T7	OCPFDLNE_01455	pflA
R_304	1451307	A	G	22	9	40.9091	control_400	T7	OCPFDLNE_01455	pflA
R_310	1451307	A	G	11	7	63.6364	control_400	T8	OCPFDLNE_01455	pflA
R_311	1451307	A	G	6	4	66.6667	control_400	T8	OCPFDLNE_01455	pflA
R_312	1451307	A	G	30	16	53.3333	control_400	T8	OCPFDLNE_01455	pflA
R_319	1451307	A	G	5	5	100	control_400	T9	OCPFDLNE_01455	pflA
R_320	1451307	A	G	6	5	83.3333	control_400	T9	OCPFDLNE_01455	pflA
R_321	1451307	A	G	11	6	54.5455	control_400	T9	OCPFDLNE_01455	pflA
R_069	1544500	T	C	69	15	21.7391	treatment_200	T8	OCPFDLNE_01549	OCPFDLNE_01549
R_073	1544500	T	C	37	10	27.027	treatment_200	T8	OCPFDLNE_01549	OCPFDLNE_01549
R_081	1544500	T	C	117	25	21.3675	treatment_200	T9	OCPFDLNE_01549	OCPFDLNE_01549
R_085	1544500	T	C	64	13	20.3125	treatment_200	T8	OCPFDLNE_01549	OCPFDLNE_01549
R_145	1544500	T	C	62	14	22.5806	treatment_400	T9	OCPFDLNE_01549	OCPFDLNE_01549
R_151	1544500	T	C	37	8	21.6216	treatment_400	T9	OCPFDLNE_01549	OCPFDLNE_01549
R_161	1544500	T	C	50	12	24	treatment_400	T8	OCPFDLNE_01549	OCPFDLNE_01549
R_169	1544500	T	C	49	8	16.3265	treatment_400	T9	OCPFDLNE_01549	OCPFDLNE_01549
R_173	1544500	T	C	76	15	19.7368	treatment_400	T8	OCPFDLNE_01549	OCPFDLNE_01549
R_085	1637322	T	C	16	3	18.75	treatment_200	T8	OCPFDLNE_01630	OCPFDLNE_01630
R_087	1637322	T	C	28	5	17.8571	treatment_200	T9	OCPFDLNE_01630	OCPFDLNE_01630
R_173	1637322	T	C	30	6	20	treatment_400	T8	OCPFDLNE_01630	OCPFDLNE_01630
R_013	1768810	A	G	5	2	40	treatment_200	T1	OCPFDLNE_01761	yfhP
R_069	1768810	A	G	10	5	50	treatment_200	T8	OCPFDLNE_01761	yfhP
R_073	1768810	A	G	12	4	33.3333	treatment_200	T8	OCPFDLNE_01761	yfhP
R_085	1768810	A	G	7	4	57.1429	treatment_200	T8	OCPFDLNE_01761	yfhP
R_135	1768810	A	G	27	4	14.8148	treatment_400	T5	OCPFDLNE_01761	yfhP
R_145	1768810	A	G	22	6	27.2727	treatment_400	T9	OCPFDLNE_01761	yfhP
R_151	1768810	A	G	19	5	26.3158	treatment_400	T9	OCPFDLNE_01761	yfhP
R_159	1768810	A	G	18	6	33.3333	treatment_400	T7	OCPFDLNE_01761	yfhP
R_169	1768810	A	G	14	7	50	treatment_400	T9	OCPFDLNE_01761	yfhP
R_173	1768810	A	G	37	8	21.6216	treatment_400	T8	OCPFDLNE_01761	yfhP
R_030	1801548	T	C	8	3	37.5	treatment_200	T4	OCPFDLNE_01798	iolU_2
R_081	1801548	T	C	6	2	33.3333	treatment_200	T9	OCPFDLNE_01798	iolU_2
R_083	1801548	T	C	6	2	33.3333	treatment_200	T7	OCPFDLNE_01798	iolU_2
R_145	1801548	T	C	11	4	36.3636	treatment_400	T9	OCPFDLNE_01798	iolU_2
R_151	1801548	T	C	6	2	33.3333	treatment_400	T9	OCPFDLNE_01798	iolU_2
R_169	1801548	T	C	11	6	54.5455	treatment_400	T9	OCPFDLNE_01798	iolU_2
R_173	1801548	T	C	6	2	33.3333	treatment_400	T8	OCPFDLNE_01798	iolU_2
R_085	1827544	T	C	4	2	50	treatment_200	T8	OCPFDLNE_01817	graR
R_087	1827544	T	C	16	4	25	treatment_200	T9	OCPFDLNE_01817	graR
R_236	1827544	T	C	6	2	33.3333	control_200	T8	OCPFDLNE_01817	graR
R_087	1951882	A	G	7	3	42.8571	treatment_200	T9	OCPFDLNE_01940	OCPFDLNE_01940
R_137	1951882	A	G	12	2	16.6667	treatment_400	T6	OCPFDLNE_01940	OCPFDLNE_01940
R_145	1951882	A	G	11	3	27.2727	treatment_400	T9	OCPFDLNE_01940	OCPFDLNE_01940
R_157	2039351	T	C	6	2	33.3333	treatment_400	T8	OCPFDLNE_02027	scpA
R_169	2039351	T	C	7	2	28.5714	treatment_400	T9	OCPFDLNE_02027	scpA
R_173	2039351	T	C	11	4	36.3636	treatment_400	T8	OCPFDLNE_02027	scpA
R_073	204136	A	G	19	5	26.3158	treatment_200	T8	OCPFDLNE_00200	spoVG_1
R_081	204136	A	G	24	4	16.6667	treatment_200	T9	OCPFDLNE_00200	spoVG_1
R_087	204136	A	G	24	6	25	treatment_200	T9	OCPFDLNE_00200	spoVG_1
R_101	204136	A	G	25	4	16	treatment_400	T1	OCPFDLNE_00200	spoVG_1
R_127	204136	A	G	10	2	20	treatment_400	T4	OCPFDLNE_00200	spoVG_1
R_135	204136	A	G	27	4	14.8148	treatment_400	T5	OCPFDLNE_00200	spoVG_1
R_145	204136	A	G	22	9	40.9091	treatment_400	T9	OCPFDLNE_00200	spoVG_1
R_151	204136	A	G	17	6	35.2941	treatment_400	T9	OCPFDLNE_00200	spoVG_1
R_157	204136	A	G	10	4	40	treatment_400	T8	OCPFDLNE_00200	spoVG_1
R_225	204136	A	G	19	3	15.7895	control_200	T7	OCPFDLNE_00200	spoVG_1
R_066	2170275	T	C	7	4	57.1429	treatment_200	T7	OCPFDLNE_02153	rimI
R_073	2170275	T	C	3	3	100	treatment_200	T8	OCPFDLNE_02153	rimI
R_127	2170275	T	C	3	3	100	treatment_400	T4	OCPFDLNE_02153	rimI
R_133	2170275	T	C	5	4	80	treatment_400	T6	OCPFDLNE_02153	rimI
R_173	2170275	T	C	6	4	66.6667	treatment_400	T8	OCPFDLNE_02153	rimI
R_179	2170275	T	C	7	4	57.1429	control_200	T1	OCPFDLNE_02153	rimI
R_188	2170275	T	C	4	2	50	control_200	T2	OCPFDLNE_02153	rimI
R_225	2170275	T	C	4	2	50	control_200	T7	OCPFDLNE_02153	rimI
R_087	2239766	T	C	26	4	15.3846	treatment_200	T9	OCPFDLNE_02253	licR_5
R_151	2239766	T	C	27	7	25.9259	treatment_400	T9	OCPFDLNE_02253	licR_5
R_157	2239766	T	C	25	4	16	treatment_400	T8	OCPFDLNE_02253	licR_5
R_001	2269171	T	C	40	11	27.5	treatment_200	T1	OCPFDLNE_02280	mdxE
R_009	2269171	T	C	43	7	16.2791	treatment_200	T2	OCPFDLNE_02280	mdxE
R_010	2269171	T	C	15	3	20	treatment_200	T2	OCPFDLNE_02280	mdxE
R_015	2269171	T	C	14	7	50	treatment_200	T2	OCPFDLNE_02280	mdxE
R_017	2269171	T	C	22	11	50	treatment_200	T1	OCPFDLNE_02280	mdxE
R_025	2269171	T	C	45	8	17.7778	treatment_200	T4	OCPFDLNE_02280	mdxE
R_030	2269171	T	C	38	8	21.0526	treatment_200	T4	OCPFDLNE_02280	mdxE
R_033	2269171	T	C	28	6	21.4286	treatment_200	T3	OCPFDLNE_02280	mdxE
R_035	2269171	T	C	46	8	17.3913	treatment_200	T4	OCPFDLNE_02280	mdxE
R_037	2269171	T	C	44	11	25	treatment_200	T3	OCPFDLNE_02280	mdxE
R_066	2269171	T	C	43	23	53.4884	treatment_200	T7	OCPFDLNE_02280	mdxE
R_069	2269171	T	C	22	19	86.3636	treatment_200	T8	OCPFDLNE_02280	mdxE
R_071	2269171	T	C	50	23	46	treatment_200	T7	OCPFDLNE_02280	mdxE
R_073	2269171	T	C	42	31	73.8095	treatment_200	T8	OCPFDLNE_02280	mdxE
R_081	2269171	T	C	60	50	83.3333	treatment_200	T9	OCPFDLNE_02280	mdxE
R_083	2269171	T	C	87	29	33.3333	treatment_200	T7	OCPFDLNE_02280	mdxE
R_085	2269171	T	C	48	30	62.5	treatment_200	T8	OCPFDLNE_02280	mdxE
R_087	2269171	T	C	54	42	77.7778	treatment_200	T9	OCPFDLNE_02280	mdxE
R_090	2269171	T	C	44	7	15.9091	treatment_400	T1	OCPFDLNE_02280	mdxE
R_093	2269171	T	C	64	19	29.6875	treatment_400	T2	OCPFDLNE_02280	mdxE
R_095	2269171	T	C	44	10	22.7273	treatment_400	T1	OCPFDLNE_02280	mdxE
R_098	2269171	T	C	76	17	22.3684	treatment_400	T2	OCPFDLNE_02280	mdxE
R_101	2269171	T	C	48	13	27.0833	treatment_400	T1	OCPFDLNE_02280	mdxE
R_118	2269171	T	C	82	13	15.8537	treatment_400	T4	OCPFDLNE_02280	mdxE
R_127	2269171	T	C	41	11	26.8293	treatment_400	T4	OCPFDLNE_02280	mdxE
R_135	2269171	T	C	89	17	19.1011	treatment_400	T5	OCPFDLNE_02280	mdxE
R_137	2269171	T	C	76	16	21.0526	treatment_400	T6	OCPFDLNE_02280	mdxE
R_145	2269171	T	C	119	93	78.1513	treatment_400	T9	OCPFDLNE_02280	mdxE
R_147	2269171	T	C	50	9	18	treatment_400	T5	OCPFDLNE_02280	mdxE
R_151	2269171	T	C	45	30	66.6667	treatment_400	T9	OCPFDLNE_02280	mdxE
R_154	2269171	T	C	169	38	22.4852	treatment_400	T7	OCPFDLNE_02280	mdxE
R_157	2269171	T	C	61	31	50.8197	treatment_400	T8	OCPFDLNE_02280	mdxE
R_159	2269171	T	C	57	9	15.7895	treatment_400	T7	OCPFDLNE_02280	mdxE
R_161	2269171	T	C	53	22	41.5094	treatment_400	T8	OCPFDLNE_02280	mdxE
R_165	2269171	T	C	57	21	36.8421	treatment_400	T7	OCPFDLNE_02280	mdxE
R_169	2269171	T	C	80	53	66.25	treatment_400	T9	OCPFDLNE_02280	mdxE
R_173	2269171	T	C	111	51	45.9459	treatment_400	T8	OCPFDLNE_02280	mdxE
R_178	2269171	T	C	93	21	22.5806	control_200	T1	OCPFDLNE_02280	mdxE
R_179	2269171	T	C	124	29	23.3871	control_200	T1	OCPFDLNE_02280	mdxE
R_185	2269171	T	C	38	6	15.7895	control_200	T2	OCPFDLNE_02280	mdxE
R_186	2269171	T	C	41	12	29.2683	control_200	T2	OCPFDLNE_02280	mdxE
R_188	2269171	T	C	45	12	26.6667	control_200	T2	OCPFDLNE_02280	mdxE
R_225	2269171	T	C	40	8	20	control_200	T7	OCPFDLNE_02280	mdxE
R_243	2269171	T	C	6	2	33.3333	control_200	T9	OCPFDLNE_02280	mdxE
R_259	2269171	T	C	60	11	18.3333	control_400	T2	OCPFDLNE_02280	mdxE
R_261	2269171	T	C	56	9	16.0714	control_400	T2	OCPFDLNE_02280	mdxE
R_302	2269171	T	C	19	4	21.0526	control_400	T7	OCPFDLNE_02280	mdxE
R_047	2288303	A	G	1	1	100	treatment_200	T5	sRNA_92	Listeria sRNA rli47
R_050	2288303	A	G	2	2	100	treatment_200	T6	sRNA_92	Listeria sRNA rli47
R_066	2288303	A	G	7	5	71.4286	treatment_200	T7	sRNA_92	Listeria sRNA rli47
R_118	2288303	A	G	4	2	50	treatment_400	T4	sRNA_92	Listeria sRNA rli47
R_133	2288303	A	G	3	2	66.6667	treatment_400	T6	sRNA_92	Listeria sRNA rli47
R_151	2288303	A	G	3	2	66.6667	treatment_400	T9	sRNA_92	Listeria sRNA rli47
R_154	2288303	A	G	8	4	50	treatment_400	T7	sRNA_92	Listeria sRNA rli47
R_159	2288303	A	G	3	2	66.6667	treatment_400	T7	sRNA_92	Listeria sRNA rli47
R_236	2288303	A	G	2	2	100	control_200	T8	sRNA_92	Listeria sRNA rli47
R_073	2298917	T	C	18	4	22.2222	treatment_200	T8	OCPFDLNE_02315	nrdE
R_081	2298917	T	C	22	6	27.2727	treatment_200	T9	OCPFDLNE_02315	nrdE
R_087	2298917	T	C	18	4	22.2222	treatment_200	T9	OCPFDLNE_02315	nrdE
R_145	2298917	T	C	30	5	16.6667	treatment_400	T9	OCPFDLNE_02315	nrdE
R_169	2298917	T	C	19	3	15.7895	treatment_400	T9	OCPFDLNE_02315	nrdE
R_081	2428075	A	G	9	2	22.2222	treatment_200	T9	OCPFDLNE_02434	pepC
R_085	2428075	A	G	5	2	40	treatment_200	T8	OCPFDLNE_02434	pepC
R_127	2428075	A	G	6	2	33.3333	treatment_400	T4	OCPFDLNE_02434	pepC
R_145	2428075	A	G	10	4	40	treatment_400	T9	OCPFDLNE_02434	pepC
R_147	2428075	A	G	8	2	25	treatment_400	T5	OCPFDLNE_02434	pepC
R_151	2428075	A	G	13	6	46.1538	treatment_400	T9	OCPFDLNE_02434	pepC
R_169	2428075	A	G	6	3	50	treatment_400	T9	OCPFDLNE_02434	pepC
R_173	2428075	A	G	12	3	25	treatment_400	T8	OCPFDLNE_02434	pepC
R_319	2428075	A	G	15	4	26.6667	control_400	T9	OCPFDLNE_02434	pepC
R_073	2467402	A	G	8	2	25	treatment_200	T8	OCPFDLNE_02484	patB
R_081	2467402	A	G	17	4	23.5294	treatment_200	T9	OCPFDLNE_02484	patB
R_087	2467402	A	G	13	3	23.0769	treatment_200	T9	OCPFDLNE_02484	patB
R_145	2467402	A	G	17	10	58.8235	treatment_400	T9	OCPFDLNE_02484	patB
R_165	2467402	A	G	13	3	23.0769	treatment_400	T7	OCPFDLNE_02484	patB
R_169	2467402	A	G	10	7	70	treatment_400	T9	OCPFDLNE_02484	patB
R_173	2467402	A	G	14	4	28.5714	treatment_400	T8	OCPFDLNE_02484	patB
R_081	2485029	T	C	6	2	33.3333	treatment_200	T9	OCPFDLNE_02503	OCPFDLNE_02503
R_147	2485029	T	C	8	3	37.5	treatment_400	T5	OCPFDLNE_02503	OCPFDLNE_02503
R_151	2485029	T	C	4	2	50	treatment_400	T9	OCPFDLNE_02503	OCPFDLNE_02503
R_154	2485029	T	C	9	3	33.3333	treatment_400	T7	OCPFDLNE_02503	OCPFDLNE_02503
R_165	2485029	T	C	6	3	50	treatment_400	T7	OCPFDLNE_02503	OCPFDLNE_02503
R_169	2485029	T	C	6	3	50	treatment_400	T9	OCPFDLNE_02503	OCPFDLNE_02503
R_173	2485029	T	C	5	3	60	treatment_400	T8	OCPFDLNE_02503	OCPFDLNE_02503
R_296	2485029	T	C	9	3	33.3333	control_400	T6	OCPFDLNE_02503	OCPFDLNE_02503
R_081	2607196	T	C	7	2	28.5714	treatment_200	T9	OCPFDLNE_02647	OCPFDLNE_02647
R_145	2607196	T	C	4	3	75	treatment_400	T9	OCPFDLNE_02647	OCPFDLNE_02647
R_173	2607196	T	C	5	2	40	treatment_400	T8	OCPFDLNE_02647	OCPFDLNE_02647
R_001	2646986	T	C	9	2	22.2222	treatment_200	T1	OCPFDLNE_02684	secA
R_017	2646986	T	C	11	7	63.6364	treatment_200	T1	OCPFDLNE_02684	secA
R_030	2646986	T	C	7	3	42.8571	treatment_200	T4	OCPFDLNE_02684	secA
R_037	2646986	T	C	19	3	15.7895	treatment_200	T3	OCPFDLNE_02684	secA
R_066	2646986	T	C	7	3	42.8571	treatment_200	T7	OCPFDLNE_02684	secA
R_071	2646986	T	C	8	2	25	treatment_200	T7	OCPFDLNE_02684	secA
R_073	2646986	T	C	6	5	83.3333	treatment_200	T8	OCPFDLNE_02684	secA
R_081	2646986	T	C	11	6	54.5455	treatment_200	T9	OCPFDLNE_02684	secA
R_083	2646986	T	C	14	3	21.4286	treatment_200	T7	OCPFDLNE_02684	secA
R_087	2646986	T	C	11	4	36.3636	treatment_200	T9	OCPFDLNE_02684	secA
R_090	2646986	T	C	8	3	37.5	treatment_400	T1	OCPFDLNE_02684	secA
R_095	2646986	T	C	5	2	40	treatment_400	T1	OCPFDLNE_02684	secA
R_097	2646986	T	C	4	2	50	treatment_400	T2	OCPFDLNE_02684	secA
R_098	2646986	T	C	4	2	50	treatment_400	T2	OCPFDLNE_02684	secA
R_113	2646986	T	C	8	3	37.5	treatment_400	T4	OCPFDLNE_02684	secA
R_118	2646986	T	C	12	3	25	treatment_400	T4	OCPFDLNE_02684	secA
R_127	2646986	T	C	4	2	50	treatment_400	T4	OCPFDLNE_02684	secA
R_133	2646986	T	C	6	2	33.3333	treatment_400	T6	OCPFDLNE_02684	secA
R_135	2646986	T	C	10	4	40	treatment_400	T5	OCPFDLNE_02684	secA
R_145	2646986	T	C	9	7	77.7778	treatment_400	T9	OCPFDLNE_02684	secA
R_147	2646986	T	C	5	3	60	treatment_400	T5	OCPFDLNE_02684	secA
R_151	2646986	T	C	5	3	60	treatment_400	T9	OCPFDLNE_02684	secA
R_154	2646986	T	C	11	7	63.6364	treatment_400	T7	OCPFDLNE_02684	secA
R_157	2646986	T	C	7	4	57.1429	treatment_400	T8	OCPFDLNE_02684	secA
R_165	2646986	T	C	8	3	37.5	treatment_400	T7	OCPFDLNE_02684	secA
R_173	2646986	T	C	9	4	44.4444	treatment_400	T8	OCPFDLNE_02684	secA
R_179	2646986	T	C	28	11	39.2857	control_200	T1	OCPFDLNE_02684	secA
R_185	2646986	T	C	12	3	25	control_200	T2	OCPFDLNE_02684	secA
R_186	2646986	T	C	23	5	21.7391	control_200	T2	OCPFDLNE_02684	secA
R_220	2646986	T	C	16	5	31.25	control_200	T6	OCPFDLNE_02684	secA
R_243	2646986	T	C	13	3	23.0769	control_200	T9	OCPFDLNE_02684	secA
R_251	2646986	T	C	9	3	33.3333	control_400	T1	OCPFDLNE_02684	secA
R_261	2646986	T	C	8	2	25	control_400	T2	OCPFDLNE_02684	secA
R_295	2646986	T	C	26	6	23.0769	control_400	T6	OCPFDLNE_02684	secA
R_302	2646986	T	C	11	5	45.4545	control_400	T7	OCPFDLNE_02684	secA
R_304	2646986	T	C	15	4	26.6667	control_400	T7	OCPFDLNE_02684	secA
R_310	2646986	T	C	4	2	50	control_400	T8	OCPFDLNE_02684	secA
R_311	2646986	T	C	5	3	60	control_400	T8	OCPFDLNE_02684	secA
R_319	2646986	T	C	5	3	60	control_400	T9	OCPFDLNE_02684	secA
R_320	2646986	T	C	7	4	57.1429	control_400	T9	OCPFDLNE_02684	secA
R_010	2649787	T	C	171	38	22.2222	treatment_200	T2	OCPFDLNE_02685	hpf
R_013	2649787	T	C	107	27	25.2336	treatment_200	T1	OCPFDLNE_02685	hpf
R_015	2649787	T	C	89	18	20.2247	treatment_200	T2	OCPFDLNE_02685	hpf
R_066	2649787	T	C	111	38	34.2342	treatment_200	T7	OCPFDLNE_02685	hpf
R_069	2649787	T	C	89	38	42.6966	treatment_200	T8	OCPFDLNE_02685	hpf
R_071	2649787	T	C	74	20	27.027	treatment_200	T7	OCPFDLNE_02685	hpf
R_073	2649787	T	C	68	43	63.2353	treatment_200	T8	OCPFDLNE_02685	hpf
R_081	2649787	T	C	92	61	66.3043	treatment_200	T9	OCPFDLNE_02685	hpf
R_083	2649787	T	C	143	29	20.2797	treatment_200	T7	OCPFDLNE_02685	hpf
R_085	2649787	T	C	38	25	65.7895	treatment_200	T8	OCPFDLNE_02685	hpf
R_087	2649787	T	C	77	57	74.026	treatment_200	T9	OCPFDLNE_02685	hpf
R_095	2649787	T	C	183	37	20.2186	treatment_400	T1	OCPFDLNE_02685	hpf
R_145	2649787	T	C	186	126	67.7419	treatment_400	T9	OCPFDLNE_02685	hpf
R_151	2649787	T	C	216	145	67.1296	treatment_400	T9	OCPFDLNE_02685	hpf
R_154	2649787	T	C	531	168	31.6384	treatment_400	T7	OCPFDLNE_02685	hpf
R_157	2649787	T	C	150	77	51.3333	treatment_400	T8	OCPFDLNE_02685	hpf
R_159	2649787	T	C	182	59	32.4176	treatment_400	T7	OCPFDLNE_02685	hpf
R_161	2649787	T	C	153	85	55.5556	treatment_400	T8	OCPFDLNE_02685	hpf
R_165	2649787	T	C	233	81	34.7639	treatment_400	T7	OCPFDLNE_02685	hpf
R_169	2649787	T	C	143	108	75.5245	treatment_400	T9	OCPFDLNE_02685	hpf
R_173	2649787	T	C	333	188	56.4565	treatment_400	T8	OCPFDLNE_02685	hpf
R_320	2649787	T	C	65	11	16.9231	control_400	T9	OCPFDLNE_02685	hpf
R_037	2760956	T	C	17	3	17.6471	treatment_200	T3	OCPFDLNE_02809	OCPFDLNE_02809
R_121	2760956	T	C	9	2	22.2222	treatment_400	T3	OCPFDLNE_02809	OCPFDLNE_02809
R_133	2760956	T	C	25	5	20	treatment_400	T6	OCPFDLNE_02809	OCPFDLNE_02809
R_135	2760956	T	C	13	4	30.7692	treatment_400	T5	OCPFDLNE_02809	OCPFDLNE_02809
R_137	2760956	T	C	16	4	25	treatment_400	T6	OCPFDLNE_02809	OCPFDLNE_02809
R_169	2760956	T	C	11	3	27.2727	treatment_400	T9	OCPFDLNE_02809	OCPFDLNE_02809
R_236	2760956	T	C	6	2	33.3333	control_200	T8	OCPFDLNE_02809	OCPFDLNE_02809
R_320	2760956	T	C	9	2	22.2222	control_400	T9	OCPFDLNE_02809	OCPFDLNE_02809
R_081	2857805	T	C	5	5	100	treatment_200	T9	OCPFDLNE_02934	kdpD
R_121	2857805	T	C	10	4	40	treatment_400	T3	OCPFDLNE_02934	kdpD
R_151	2857805	T	C	7	5	71.4286	treatment_400	T9	OCPFDLNE_02934	kdpD
R_165	2857805	T	C	4	2	50	treatment_400	T7	OCPFDLNE_02934	kdpD
R_173	2857805	T	C	5	2	40	treatment_400	T8	OCPFDLNE_02934	kdpD
R_179	2857805	T	C	9	3	33.3333	control_200	T1	OCPFDLNE_02934	kdpD
R_188	2857805	T	C	4	2	50	control_200	T2	OCPFDLNE_02934	kdpD
R_220	2857805	T	C	7	2	28.5714	control_200	T6	OCPFDLNE_02934	kdpD
R_269	2857805	T	C	4	2	50	control_400	T3	OCPFDLNE_02934	kdpD
R_295	2857805	T	C	4	3	75	control_400	T6	OCPFDLNE_02934	kdpD
R_083	3016678	T	C	13	3	23.0769	treatment_200	T7	OCPFDLNE_03082	garK_2
R_098	3016678	T	C	5	2	40	treatment_400	T2	OCPFDLNE_03082	garK_2
R_151	3016678	T	C	7	3	42.8571	treatment_400	T9	OCPFDLNE_03082	garK_2
R_081	322606	A	G	24	4	16.6667	treatment_200	T9	OCPFDLNE_00309	walR
R_137	322606	A	G	13	3	23.0769	treatment_400	T6	OCPFDLNE_00309	walR
R_145	322606	A	G	23	5	21.7391	treatment_400	T9	OCPFDLNE_00309	walR
R_169	322606	A	G	19	6	31.5789	treatment_400	T9	OCPFDLNE_00309	walR
R_173	322606	A	G	40	6	15	treatment_400	T8	OCPFDLNE_00309	walR
R_081	429958	A	G	7	2	28.5714	treatment_200	T9	OCPFDLNE_00419	mngB_1
R_087	429958	A	G	9	2	22.2222	treatment_200	T9	OCPFDLNE_00419	mngB_1
R_145	429958	A	G	21	7	33.3333	treatment_400	T9	OCPFDLNE_00419	mngB_1
R_151	429958	A	G	20	6	30	treatment_400	T9	OCPFDLNE_00419	mngB_1
R_154	429958	A	G	39	6	15.3846	treatment_400	T7	OCPFDLNE_00419	mngB_1
R_157	429958	A	G	10	2	20	treatment_400	T8	OCPFDLNE_00419	mngB_1
R_161	429958	A	G	12	4	33.3333	treatment_400	T8	OCPFDLNE_00419	mngB_1
R_173	429958	A	G	16	3	18.75	treatment_400	T8	OCPFDLNE_00419	mngB_1
R_041	497744	A	G	8	8	100	treatment_200	T5	OCPFDLNE_00478	dhaS
R_050	497744	A	G	6	6	100	treatment_200	T6	OCPFDLNE_00478	dhaS
R_053	497744	A	G	4	3	75	treatment_200	T5	OCPFDLNE_00478	dhaS
R_066	497744	A	G	4	2	50	treatment_200	T7	OCPFDLNE_00478	dhaS
R_073	497744	A	G	2	2	100	treatment_200	T8	OCPFDLNE_00478	dhaS
R_081	497744	A	G	5	4	80	treatment_200	T9	OCPFDLNE_00478	dhaS
R_083	497744	A	G	9	8	88.8889	treatment_200	T7	OCPFDLNE_00478	dhaS
R_085	497744	A	G	3	3	100	treatment_200	T8	OCPFDLNE_00478	dhaS
R_087	497744	A	G	5	5	100	treatment_200	T9	OCPFDLNE_00478	dhaS
R_098	497744	A	G	4	4	100	treatment_400	T2	OCPFDLNE_00478	dhaS
R_133	497744	A	G	5	4	80	treatment_400	T6	OCPFDLNE_00478	dhaS
R_154	497744	A	G	5	2	40	treatment_400	T7	OCPFDLNE_00478	dhaS
R_069	573660	A	G	39	7	17.9487	treatment_200	T8	OCPFDLNE_00547	pbpX
R_081	573660	A	G	66	17	25.7576	treatment_200	T9	OCPFDLNE_00547	pbpX
R_087	573660	A	G	45	9	20	treatment_200	T9	OCPFDLNE_00547	pbpX
R_145	573660	A	G	24	6	25	treatment_400	T9	OCPFDLNE_00547	pbpX
R_151	573660	A	G	24	7	29.1667	treatment_400	T9	OCPFDLNE_00547	pbpX
R_169	573660	A	G	30	6	20	treatment_400	T9	OCPFDLNE_00547	pbpX
R_159	843039	A	G	4	2	50	treatment_400	T7	OCPFDLNE_00840	cycA
R_173	843039	A	G	6	3	50	treatment_400	T8	OCPFDLNE_00840	cycA
R_311	843039	A	G	6	2	33.3333	control_400	T8	OCPFDLNE_00840	cycA

## Sheet: ScottA
Variant Pos.	Locus_tag	Gene name	Ref	Variant	Number of treated sample variant seen	Number of control sample variant seen
51567	LMOSA_8740	aguA	A	G	2	1
129440	intergenic_region	intergenic_region	A	G	4	0
242871	LMOSA_10890	spoVG	A	G	12	0
252859	LMOSA_10970	actA	A	G	39	26
257308	LMOSA_11030	ldh	A	G	53	54
320780	LMOSA_11570	rpoB	A	G	5	1
403379	LMOSA_12240	-	A	G	2	6
568103	LMOSA_13830	dhaS	A	G	13	21
575176	LMOSA_13910	ydjA	A	G	2	1
629927	LMOSA_14440	-	A	G	3	0
720351	intergenic_region	intergenic_region	A	G	10	0
1120919	intergenic_region	intergenic_region	A	G	3	0
1282535	LMOSA_21080	-	A	G	11	4
1458676	LMOSA_23000	-	A	G	3	0
1586671	LMOSA_24230	-	T	C	7	0
1630529	LMOSA_24610	glpF	T	C	4	1
1661909	LMOSA_24890	citZ	T	C	4	0
1717344	LMOSA_25410	pepV	T	C	15	1
1731486	LMOSA_25560	-	A	G	5	1
1775078	LMOSA_25880	-	T	C	10	0
1843087	LMOSA_26480	-	T	C	53	52
1895023	LMOSA_26890	purF	T	C	3	1
2093061	LMOSA_28780	xerD	T	C	4	0
2229297	LMOSA_630	rimI	T	C	4	2
2281668	LMOSA_1140	mdxE	T	C	14	4
2301135	LMOSA_1310	-	A	G	8	0
2324765	LMOSA_1570	gloA	A	G	12	0
2448859	LMOSA_2660	adaB	T	C	3	0
2481510	LMOSA_2970	pepC	A	G	11	1
2520887	LMOSA_3290	patB	A	G	10	0
2548257	LMOSA_3580	-	T	C	7	0
2607624	LMOSA_4150	rnr	T	C	4	0
2619490	LMOSA_4270	rpoN	T	C	6	3
2675586	LMOSA_4770	hpf	T	C	21	0
2715706	LMOSA_5200	-	T	C	9	2
2746436	LMOSA_5520	-	T	C	3	0
2867172	LMOSA_6810	-	T	C	4	0
2996208	LMOSA_7990	glxK	T	C	5	0

## Sheet: ScottA_samples_with_variants
sample ID	position	Ref	Alt	total coverage	variant coverage	percentage	condition	timepoint	locus_tag	gene name
R_104	1120919	A	G	6	2	33.3333	treatment_400	T2	intergenic_region	intergenic_region
R_166	1120919	A	G	4	3	75	treatment_400	T7	intergenic_region	intergenic_region
R_172	1120919	A	G	5	3	60	treatment_400	T7	intergenic_region	intergenic_region
R_028	1282535	A	G	5	5	100	treatment_200	T3	LMOSA_21080	-
R_044	1282535	A	G	4	4	100	treatment_200	T5	LMOSA_21080	-
R_052	1282535	A	G	3	3	100	treatment_200	T6	LMOSA_21080	-
R_062	1282535	A	G	4	4	100	treatment_200	T6	LMOSA_21080	-
R_068	1282535	A	G	3	3	100	treatment_200	T6	LMOSA_21080	-
R_076	1282535	A	G	4	4	100	treatment_200	T8	LMOSA_21080	-
R_078	1282535	A	G	4	4	100	treatment_200	T7	LMOSA_21080	-
R_080	1282535	A	G	6	6	100	treatment_200	T8	LMOSA_21080	-
R_082	1282535	A	G	5	5	100	treatment_200	T9	LMOSA_21080	-
R_091	1282535	A	G	5	5	100	treatment_400	T1	LMOSA_21080	-
R_136	1282535	A	G	5	5	100	treatment_400	T5	LMOSA_21080	-
R_189	1282535	A	G	2	2	100	control_200	T2	LMOSA_21080	-
R_200	1282535	A	G	4	4	100	control_200	T3	LMOSA_21080	-
R_255	1282535	A	G	4	4	100	control_400	T1	LMOSA_21080	-
R_276	1282535	A	G	5	5	100	control_400	T3	LMOSA_21080	-
R_020	129440	A	G	4	3	75	treatment_200	T2	intergenic_region	intergenic_region
R_136	129440	A	G	5	2	40	treatment_400	T5	intergenic_region	intergenic_region
R_158	129440	A	G	6	2	33.3333	treatment_400	T8	intergenic_region	intergenic_region
R_166	129440	A	G	5	4	80	treatment_400	T7	intergenic_region	intergenic_region
R_152	1458676	A	G	9	5	55.5556	treatment_400	T9	LMOSA_23000	-
R_160	1458676	A	G	4	2	50	treatment_400	T7	LMOSA_23000	-
R_170	1458676	A	G	7	2	28.5714	treatment_400	T9	LMOSA_23000	-
R_064	1586671	T	C	69	20	28.9855	treatment_200	T9	LMOSA_24230	-
R_068	1586671	T	C	42	6	14.2857	treatment_200	T6	LMOSA_24230	-
R_076	1586671	T	C	46	9	19.5652	treatment_200	T8	LMOSA_24230	-
R_082	1586671	T	C	62	12	19.3548	treatment_200	T9	LMOSA_24230	-
R_088	1586671	T	C	74	22	29.7297	treatment_200	T9	LMOSA_24230	-
R_146	1586671	T	C	15	3	20	treatment_400	T9	LMOSA_24230	-
R_170	1586671	T	C	64	13	20.3125	treatment_400	T9	LMOSA_24230	-
R_064	1630529	T	C	24	4	16.6667	treatment_200	T9	LMOSA_24610	glpF
R_082	1630529	T	C	33	6	18.1818	treatment_200	T9	LMOSA_24610	glpF
R_146	1630529	T	C	30	6	20	treatment_400	T9	LMOSA_24610	glpF
R_170	1630529	T	C	26	6	23.0769	treatment_400	T9	LMOSA_24610	glpF
R_291	1630529	T	C	29	6	20.6897	control_400	T5	LMOSA_24610	glpF
R_144	1661909	T	C	18	3	16.6667	treatment_400	T6	LMOSA_24890	citZ
R_163	1661909	T	C	19	4	21.0526	treatment_400	T8	LMOSA_24890	citZ
R_168	1661909	T	C	6	2	33.3333	treatment_400	T8	LMOSA_24890	citZ
R_172	1661909	T	C	33	5	15.1515	treatment_400	T7	LMOSA_24890	citZ
R_064	1717344	T	C	7	4	57.1429	treatment_200	T9	LMOSA_25410	pepV
R_068	1717344	T	C	7	4	57.1429	treatment_200	T6	LMOSA_25410	pepV
R_070	1717344	T	C	6	3	50	treatment_200	T8	LMOSA_25410	pepV
R_072	1717344	T	C	12	5	41.6667	treatment_200	T7	LMOSA_25410	pepV
R_076	1717344	T	C	10	3	30	treatment_200	T8	LMOSA_25410	pepV
R_082	1717344	T	C	9	5	55.5556	treatment_200	T9	LMOSA_25410	pepV
R_088	1717344	T	C	13	6	46.1538	treatment_200	T9	LMOSA_25410	pepV
R_104	1717344	T	C	6	2	33.3333	treatment_400	T2	LMOSA_25410	pepV
R_120	1717344	T	C	8	3	37.5	treatment_400	T4	LMOSA_25410	pepV
R_152	1717344	T	C	16	7	43.75	treatment_400	T9	LMOSA_25410	pepV
R_158	1717344	T	C	12	4	33.3333	treatment_400	T8	LMOSA_25410	pepV
R_163	1717344	T	C	7	2	28.5714	treatment_400	T8	LMOSA_25410	pepV
R_166	1717344	T	C	9	3	33.3333	treatment_400	T7	LMOSA_25410	pepV
R_170	1717344	T	C	7	4	57.1429	treatment_400	T9	LMOSA_25410	pepV
R_172	1717344	T	C	13	3	23.0769	treatment_400	T7	LMOSA_25410	pepV
R_184	1717344	T	C	15	3	20	control_200	T1	LMOSA_25410	pepV
R_064	1731486	A	G	25	6	24	treatment_200	T9	LMOSA_25560	-
R_076	1731486	A	G	46	8	17.3913	treatment_200	T8	LMOSA_25560	-
R_082	1731486	A	G	48	17	35.4167	treatment_200	T9	LMOSA_25560	-
R_088	1731486	A	G	39	9	23.0769	treatment_200	T9	LMOSA_25560	-
R_152	1731486	A	G	59	8	13.5593	treatment_400	T9	LMOSA_25560	-
R_316	1731486	A	G	8	2	25	control_400	T8	LMOSA_25560	-
R_028	1775078	T	C	4	2	50	treatment_200	T3	LMOSA_25880	-
R_052	1775078	T	C	9	3	33.3333	treatment_200	T6	LMOSA_25880	-
R_082	1775078	T	C	12	4	33.3333	treatment_200	T9	LMOSA_25880	-
R_136	1775078	T	C	11	3	27.2727	treatment_400	T5	LMOSA_25880	-
R_152	1775078	T	C	16	3	18.75	treatment_400	T9	LMOSA_25880	-
R_158	1775078	T	C	10	2	20	treatment_400	T8	LMOSA_25880	-
R_163	1775078	T	C	6	2	33.3333	treatment_400	T8	LMOSA_25880	-
R_166	1775078	T	C	9	2	22.2222	treatment_400	T7	LMOSA_25880	-
R_170	1775078	T	C	8	2	25	treatment_400	T9	LMOSA_25880	-
R_172	1775078	T	C	12	5	41.6667	treatment_400	T7	LMOSA_25880	-
R_004	1843087	T	C	16	15	93.75	treatment_200	T1	LMOSA_26480	-
R_008	1843087	T	C	11	11	100	treatment_200	T1	LMOSA_26480	-
R_012	1843087	T	C	12	12	100	treatment_200	T2	LMOSA_26480	-
R_014	1843087	T	C	10	9	90	treatment_200	T1	LMOSA_26480	-
R_016	1843087	T	C	19	19	100	treatment_200	T2	LMOSA_26480	-
R_020	1843087	T	C	10	10	100	treatment_200	T2	LMOSA_26480	-
R_024	1843087	T	C	17	17	100	treatment_200	T3	LMOSA_26480	-
R_026	1843087	T	C	19	19	100	treatment_200	T4	LMOSA_26480	-
R_028	1843087	T	C	17	17	100	treatment_200	T3	LMOSA_26480	-
R_032	1843087	T	C	11	11	100	treatment_200	T4	LMOSA_26480	-
R_036	1843087	T	C	8	8	100	treatment_200	T4	LMOSA_26480	-
R_038	1843087	T	C	12	12	100	treatment_200	T3	LMOSA_26480	-
R_044	1843087	T	C	30	30	100	treatment_200	T5	LMOSA_26480	-
R_052	1843087	T	C	14	14	100	treatment_200	T6	LMOSA_26480	-
R_054	1843087	T	C	15	15	100	treatment_200	T5	LMOSA_26480	-
R_060	1843087	T	C	24	24	100	treatment_200	T5	LMOSA_26480	-
R_062	1843087	T	C	21	21	100	treatment_200	T6	LMOSA_26480	-
R_064	1843087	T	C	6	6	100	treatment_200	T9	LMOSA_26480	-
R_068	1843087	T	C	16	16	100	treatment_200	T6	LMOSA_26480	-
R_070	1843087	T	C	9	9	100	treatment_200	T8	LMOSA_26480	-
R_072	1843087	T	C	4	4	100	treatment_200	T7	LMOSA_26480	-
R_076	1843087	T	C	22	22	100	treatment_200	T8	LMOSA_26480	-
R_078	1843087	T	C	14	14	100	treatment_200	T7	LMOSA_26480	-
R_080	1843087	T	C	30	30	100	treatment_200	T8	LMOSA_26480	-
R_082	1843087	T	C	29	29	100	treatment_200	T9	LMOSA_26480	-
R_088	1843087	T	C	6	6	100	treatment_200	T9	LMOSA_26480	-
R_091	1843087	T	C	7	7	100	treatment_400	T1	LMOSA_26480	-
R_094	1843087	T	C	23	23	100	treatment_400	T2	LMOSA_26480	-
R_096	1843087	T	C	9	9	100	treatment_400	T1	LMOSA_26480	-
R_104	1843087	T	C	16	16	100	treatment_400	T2	LMOSA_26480	-
R_106	1843087	T	C	18	18	100	treatment_400	T1	LMOSA_26480	-
R_108	1843087	T	C	13	13	100	treatment_400	T2	LMOSA_26480	-
R_111	1843087	T	C	19	19	100	treatment_400	T3	LMOSA_26480	-
R_114	1843087	T	C	27	27	100	treatment_400	T4	LMOSA_26480	-
R_116	1843087	T	C	25	25	100	treatment_400	T3	LMOSA_26480	-
R_120	1843087	T	C	18	18	100	treatment_400	T4	LMOSA_26480	-
R_122	1843087	T	C	11	11	100	treatment_400	T3	LMOSA_26480	-
R_128	1843087	T	C	23	23	100	treatment_400	T4	LMOSA_26480	-
R_136	1843087	T	C	52	52	100	treatment_400	T5	LMOSA_26480	-
R_140	1843087	T	C	48	48	100	treatment_400	T6	LMOSA_26480	-
R_142	1843087	T	C	39	39	100	treatment_400	T5	LMOSA_26480	-
R_144	1843087	T	C	57	57	100	treatment_400	T6	LMOSA_26480	-
R_146	1843087	T	C	22	22	100	treatment_400	T9	LMOSA_26480	-
R_148	1843087	T	C	30	30	100	treatment_400	T5	LMOSA_26480	-
R_150	1843087	T	C	46	46	100	treatment_400	T6	LMOSA_26480	-
R_152	1843087	T	C	65	65	100	treatment_400	T9	LMOSA_26480	-
R_158	1843087	T	C	57	57	100	treatment_400	T8	LMOSA_26480	-
R_160	1843087	T	C	33	33	100	treatment_400	T7	LMOSA_26480	-
R_163	1843087	T	C	37	37	100	treatment_400	T8	LMOSA_26480	-
R_166	1843087	T	C	44	43	97.7273	treatment_400	T7	LMOSA_26480	-
R_168	1843087	T	C	8	8	100	treatment_400	T8	LMOSA_26480	-
R_170	1843087	T	C	45	45	100	treatment_400	T9	LMOSA_26480	-
R_172	1843087	T	C	68	68	100	treatment_400	T7	LMOSA_26480	-
R_181	1843087	T	C	65	65	100	control_200	T1	LMOSA_26480	-
R_183	1843087	T	C	61	61	100	control_200	T1	LMOSA_26480	-
R_184	1843087	T	C	55	55	100	control_200	T1	LMOSA_26480	-
R_189	1843087	T	C	59	59	100	control_200	T2	LMOSA_26480	-
R_190	1843087	T	C	59	59	100	control_200	T2	LMOSA_26480	-
R_191	1843087	T	C	25	25	100	control_200	T2	LMOSA_26480	-
R_197	1843087	T	C	44	44	100	control_200	T3	LMOSA_26480	-
R_198	1843087	T	C	38	38	100	control_200	T3	LMOSA_26480	-
R_200	1843087	T	C	61	61	100	control_200	T3	LMOSA_26480	-
R_205	1843087	T	C	22	22	100	control_200	T4	LMOSA_26480	-
R_206	1843087	T	C	15	15	100	control_200	T4	LMOSA_26480	-
R_208	1843087	T	C	54	53	98.1481	control_200	T4	LMOSA_26480	-
R_214	1843087	T	C	24	24	100	control_200	T5	LMOSA_26480	-
R_215	1843087	T	C	57	57	100	control_200	T5	LMOSA_26480	-
R_216	1843087	T	C	54	54	100	control_200	T5	LMOSA_26480	-
R_222	1843087	T	C	36	36	100	control_200	T6	LMOSA_26480	-
R_223	1843087	T	C	31	31	100	control_200	T6	LMOSA_26480	-
R_224	1843087	T	C	26	26	100	control_200	T6	LMOSA_26480	-
R_229	1843087	T	C	38	37	97.3684	control_200	T7	LMOSA_26480	-
R_230	1843087	T	C	65	65	100	control_200	T7	LMOSA_26480	-
R_232	1843087	T	C	58	57	98.2759	control_200	T7	LMOSA_26480	-
R_237	1843087	T	C	21	21	100	control_200	T8	LMOSA_26480	-
R_238	1843087	T	C	30	30	100	control_200	T8	LMOSA_26480	-
R_240	1843087	T	C	49	49	100	control_200	T8	LMOSA_26480	-
R_248	1843087	T	C	18	18	100	control_200	T9	LMOSA_26480	-
R_255	1843087	T	C	57	57	100	control_400	T1	LMOSA_26480	-
R_256	1843087	T	C	18	18	100	control_400	T1	LMOSA_26480	-
R_257	1843087	T	C	39	39	100	control_400	T1	LMOSA_26480	-
R_264	1843087	T	C	41	41	100	control_400	T2	LMOSA_26480	-
R_265	1843087	T	C	45	45	100	control_400	T2	LMOSA_26480	-
R_266	1843087	T	C	47	47	100	control_400	T2	LMOSA_26480	-
R_274	1843087	T	C	11	11	100	control_400	T3	LMOSA_26480	-
R_275	1843087	T	C	40	40	100	control_400	T3	LMOSA_26480	-
R_276	1843087	T	C	42	42	100	control_400	T3	LMOSA_26480	-
R_282	1843087	T	C	6	6	100	control_400	T4	LMOSA_26480	-
R_284	1843087	T	C	39	39	100	control_400	T4	LMOSA_26480	-
R_285	1843087	T	C	35	35	100	control_400	T4	LMOSA_26480	-
R_290	1843087	T	C	18	18	100	control_400	T5	LMOSA_26480	-
R_291	1843087	T	C	3	3	100	control_400	T5	LMOSA_26480	-
R_292	1843087	T	C	37	37	100	control_400	T5	LMOSA_26480	-
R_298	1843087	T	C	12	12	100	control_400	T6	LMOSA_26480	-
R_300	1843087	T	C	65	65	100	control_400	T6	LMOSA_26480	-
R_301	1843087	T	C	35	35	100	control_400	T6	LMOSA_26480	-
R_306	1843087	T	C	43	43	100	control_400	T7	LMOSA_26480	-
R_308	1843087	T	C	25	25	100	control_400	T7	LMOSA_26480	-
R_309	1843087	T	C	70	70	100	control_400	T7	LMOSA_26480	-
R_314	1843087	T	C	29	29	100	control_400	T8	LMOSA_26480	-
R_316	1843087	T	C	29	29	100	control_400	T8	LMOSA_26480	-
R_317	1843087	T	C	46	46	100	control_400	T8	LMOSA_26480	-
R_322	1843087	T	C	5	5	100	control_400	T9	LMOSA_26480	-
R_323	1843087	T	C	10	10	100	control_400	T9	LMOSA_26480	-
R_325	1843087	T	C	11	11	100	control_400	T9	LMOSA_26480	-
R_064	1895023	T	C	4	2	50	treatment_200	T9	LMOSA_26890	purF
R_150	1895023	T	C	6	2	33.3333	treatment_400	T6	LMOSA_26890	purF
R_152	1895023	T	C	4	2	50	treatment_400	T9	LMOSA_26890	purF
R_323	1895023	T	C	3	2	66.6667	control_400	T9	LMOSA_26890	purF
R_108	2093061	T	C	16	3	18.75	treatment_400	T2	LMOSA_28780	xerD
R_152	2093061	T	C	30	8	26.6667	treatment_400	T9	LMOSA_28780	xerD
R_168	2093061	T	C	21	4	19.0476	treatment_400	T8	LMOSA_28780	xerD
R_170	2093061	T	C	42	6	14.2857	treatment_400	T9	LMOSA_28780	xerD
R_012	2229297	T	C	4	3	75	treatment_200	T2	LMOSA_630	rimI
R_128	2229297	T	C	3	2	66.6667	treatment_400	T4	LMOSA_630	rimI
R_152	2229297	T	C	4	4	100	treatment_400	T9	LMOSA_630	rimI
R_172	2229297	T	C	4	3	75	treatment_400	T7	LMOSA_630	rimI
R_256	2229297	T	C	6	2	33.3333	control_400	T1	LMOSA_630	rimI
R_264	2229297	T	C	7	4	57.1429	control_400	T2	LMOSA_630	rimI
R_080	2281668	T	C	5	4	80	treatment_200	T8	LMOSA_1140	mdxE
R_082	2281668	T	C	7	7	100	treatment_200	T9	LMOSA_1140	mdxE
R_128	2281668	T	C	7	4	57.1429	treatment_400	T4	LMOSA_1140	mdxE
R_136	2281668	T	C	17	5	29.4118	treatment_400	T5	LMOSA_1140	mdxE
R_140	2281668	T	C	17	4	23.5294	treatment_400	T6	LMOSA_1140	mdxE
R_144	2281668	T	C	16	4	25	treatment_400	T6	LMOSA_1140	mdxE
R_146	2281668	T	C	9	6	66.6667	treatment_400	T9	LMOSA_1140	mdxE
R_152	2281668	T	C	23	15	65.2174	treatment_400	T9	LMOSA_1140	mdxE
R_158	2281668	T	C	8	5	62.5	treatment_400	T8	LMOSA_1140	mdxE
R_160	2281668	T	C	15	6	40	treatment_400	T7	LMOSA_1140	mdxE
R_163	2281668	T	C	12	9	75	treatment_400	T8	LMOSA_1140	mdxE
R_166	2281668	T	C	11	7	63.6364	treatment_400	T7	LMOSA_1140	mdxE
R_170	2281668	T	C	10	6	60	treatment_400	T9	LMOSA_1140	mdxE
R_172	2281668	T	C	13	5	38.4615	treatment_400	T7	LMOSA_1140	mdxE
R_184	2281668	T	C	27	7	25.9259	control_200	T1	LMOSA_1140	mdxE
R_190	2281668	T	C	10	2	20	control_200	T2	LMOSA_1140	mdxE
R_257	2281668	T	C	13	4	30.7692	control_400	T1	LMOSA_1140	mdxE
R_316	2281668	T	C	6	4	66.6667	control_400	T8	LMOSA_1140	mdxE
R_080	2301135	A	G	15	3	20	treatment_200	T8	LMOSA_1310	-
R_108	2301135	A	G	10	2	20	treatment_400	T2	LMOSA_1310	-
R_140	2301135	A	G	18	3	16.6667	treatment_400	T6	LMOSA_1310	-
R_146	2301135	A	G	14	4	28.5714	treatment_400	T9	LMOSA_1310	-
R_150	2301135	A	G	10	2	20	treatment_400	T6	LMOSA_1310	-
R_152	2301135	A	G	30	6	20	treatment_400	T9	LMOSA_1310	-
R_166	2301135	A	G	23	6	26.087	treatment_400	T7	LMOSA_1310	-
R_170	2301135	A	G	21	10	47.619	treatment_400	T9	LMOSA_1310	-
R_068	2324765	A	G	6	3	50	treatment_200	T6	LMOSA_1570	gloA
R_070	2324765	A	G	5	2	40	treatment_200	T8	LMOSA_1570	gloA
R_080	2324765	A	G	8	2	25	treatment_200	T8	LMOSA_1570	gloA
R_082	2324765	A	G	7	7	100	treatment_200	T9	LMOSA_1570	gloA
R_108	2324765	A	G	7	4	57.1429	treatment_400	T2	LMOSA_1570	gloA
R_140	2324765	A	G	13	5	38.4615	treatment_400	T6	LMOSA_1570	gloA
R_142	2324765	A	G	9	4	44.4444	treatment_400	T5	LMOSA_1570	gloA
R_148	2324765	A	G	7	4	57.1429	treatment_400	T5	LMOSA_1570	gloA
R_152	2324765	A	G	9	6	66.6667	treatment_400	T9	LMOSA_1570	gloA
R_158	2324765	A	G	7	2	28.5714	treatment_400	T8	LMOSA_1570	gloA
R_160	2324765	A	G	6	2	33.3333	treatment_400	T7	LMOSA_1570	gloA
R_172	2324765	A	G	15	8	53.3333	treatment_400	T7	LMOSA_1570	gloA
R_052	242871	A	G	27	4	14.8148	treatment_200	T6	LMOSA_10890	spoVG
R_064	242871	A	G	22	9	40.9091	treatment_200	T9	LMOSA_10890	spoVG
R_070	242871	A	G	21	7	33.3333	treatment_200	T8	LMOSA_10890	spoVG
R_076	242871	A	G	18	5	27.7778	treatment_200	T8	LMOSA_10890	spoVG
R_082	242871	A	G	17	4	23.5294	treatment_200	T9	LMOSA_10890	spoVG
R_088	242871	A	G	19	4	21.0526	treatment_200	T9	LMOSA_10890	spoVG
R_136	242871	A	G	24	4	16.6667	treatment_400	T5	LMOSA_10890	spoVG
R_146	242871	A	G	7	3	42.8571	treatment_400	T9	LMOSA_10890	spoVG
R_152	242871	A	G	30	10	33.3333	treatment_400	T9	LMOSA_10890	spoVG
R_158	242871	A	G	20	6	30	treatment_400	T8	LMOSA_10890	spoVG
R_168	242871	A	G	13	3	23.0769	treatment_400	T8	LMOSA_10890	spoVG
R_170	242871	A	G	27	8	29.6296	treatment_400	T9	LMOSA_10890	spoVG
R_080	2448859	T	C	30	5	16.6667	treatment_200	T8	LMOSA_2660	adaB
R_146	2448859	T	C	15	3	20	treatment_400	T9	LMOSA_2660	adaB
R_170	2448859	T	C	31	6	19.3548	treatment_400	T9	LMOSA_2660	adaB
R_064	2481510	A	G	14	4	28.5714	treatment_200	T9	LMOSA_2970	pepC
R_070	2481510	A	G	15	3	20	treatment_200	T8	LMOSA_2970	pepC
R_080	2481510	A	G	26	5	19.2308	treatment_200	T8	LMOSA_2970	pepC
R_082	2481510	A	G	36	11	30.5556	treatment_200	T9	LMOSA_2970	pepC
R_088	2481510	A	G	18	5	27.7778	treatment_200	T9	LMOSA_2970	pepC
R_136	2481510	A	G	23	4	17.3913	treatment_400	T5	LMOSA_2970	pepC
R_146	2481510	A	G	14	3	21.4286	treatment_400	T9	LMOSA_2970	pepC
R_152	2481510	A	G	26	6	23.0769	treatment_400	T9	LMOSA_2970	pepC
R_158	2481510	A	G	26	6	23.0769	treatment_400	T8	LMOSA_2970	pepC
R_170	2481510	A	G	44	9	20.4545	treatment_400	T9	LMOSA_2970	pepC
R_172	2481510	A	G	23	4	17.3913	treatment_400	T7	LMOSA_2970	pepC
R_323	2481510	A	G	39	5	12.8205	control_400	T9	LMOSA_2970	pepC
R_064	2520887	A	G	7	3	42.8571	treatment_200	T9	LMOSA_3290	patB
R_076	2520887	A	G	7	2	28.5714	treatment_200	T8	LMOSA_3290	patB
R_078	2520887	A	G	4	2	50	treatment_200	T7	LMOSA_3290	patB
R_120	2520887	A	G	11	2	18.1818	treatment_400	T4	LMOSA_3290	patB
R_146	2520887	A	G	6	4	66.6667	treatment_400	T9	LMOSA_3290	patB
R_152	2520887	A	G	8	5	62.5	treatment_400	T9	LMOSA_3290	patB
R_160	2520887	A	G	6	3	50	treatment_400	T7	LMOSA_3290	patB
R_163	2520887	A	G	5	2	40	treatment_400	T8	LMOSA_3290	patB
R_166	2520887	A	G	5	3	60	treatment_400	T7	LMOSA_3290	patB
R_172	2520887	A	G	7	2	28.5714	treatment_400	T7	LMOSA_3290	patB
R_004	252859	A	G	5	4	80	treatment_200	T1	LMOSA_10970	actA
R_014	252859	A	G	4	3	75	treatment_200	T1	LMOSA_10970	actA
R_016	252859	A	G	6	4	66.6667	treatment_200	T2	LMOSA_10970	actA
R_024	252859	A	G	12	8	66.6667	treatment_200	T3	LMOSA_10970	actA
R_032	252859	A	G	5	4	80	treatment_200	T4	LMOSA_10970	actA
R_036	252859	A	G	4	3	75	treatment_200	T4	LMOSA_10970	actA
R_038	252859	A	G	8	4	50	treatment_200	T3	LMOSA_10970	actA
R_052	252859	A	G	16	6	37.5	treatment_200	T6	LMOSA_10970	actA
R_054	252859	A	G	9	5	55.5556	treatment_200	T5	LMOSA_10970	actA
R_060	252859	A	G	24	18	75	treatment_200	T5	LMOSA_10970	actA
R_062	252859	A	G	9	4	44.4444	treatment_200	T6	LMOSA_10970	actA
R_064	252859	A	G	9	5	55.5556	treatment_200	T9	LMOSA_10970	actA
R_068	252859	A	G	9	6	66.6667	treatment_200	T6	LMOSA_10970	actA
R_070	252859	A	G	12	7	58.3333	treatment_200	T8	LMOSA_10970	actA
R_076	252859	A	G	12	3	25	treatment_200	T8	LMOSA_10970	actA
R_080	252859	A	G	15	7	46.6667	treatment_200	T8	LMOSA_10970	actA
R_091	252859	A	G	15	7	46.6667	treatment_400	T1	LMOSA_10970	actA
R_094	252859	A	G	4	2	50	treatment_400	T2	LMOSA_10970	actA
R_096	252859	A	G	4	2	50	treatment_400	T1	LMOSA_10970	actA
R_104	252859	A	G	4	3	75	treatment_400	T2	LMOSA_10970	actA
R_106	252859	A	G	5	2	40	treatment_400	T1	LMOSA_10970	actA
R_108	252859	A	G	4	3	75	treatment_400	T2	LMOSA_10970	actA
R_111	252859	A	G	13	8	61.5385	treatment_400	T3	LMOSA_10970	actA
R_114	252859	A	G	13	7	53.8462	treatment_400	T4	LMOSA_10970	actA
R_120	252859	A	G	8	5	62.5	treatment_400	T4	LMOSA_10970	actA
R_122	252859	A	G	8	7	87.5	treatment_400	T3	LMOSA_10970	actA
R_136	252859	A	G	11	7	63.6364	treatment_400	T5	LMOSA_10970	actA
R_140	252859	A	G	8	3	37.5	treatment_400	T6	LMOSA_10970	actA
R_142	252859	A	G	9	5	55.5556	treatment_400	T5	LMOSA_10970	actA
R_144	252859	A	G	12	6	50	treatment_400	T6	LMOSA_10970	actA
R_146	252859	A	G	6	3	50	treatment_400	T9	LMOSA_10970	actA
R_148	252859	A	G	5	4	80	treatment_400	T5	LMOSA_10970	actA
R_152	252859	A	G	11	5	45.4545	treatment_400	T9	LMOSA_10970	actA
R_158	252859	A	G	11	6	54.5455	treatment_400	T8	LMOSA_10970	actA
R_160	252859	A	G	24	11	45.8333	treatment_400	T7	LMOSA_10970	actA
R_163	252859	A	G	9	3	33.3333	treatment_400	T8	LMOSA_10970	actA
R_166	252859	A	G	13	9	69.2308	treatment_400	T7	LMOSA_10970	actA
R_168	252859	A	G	7	4	57.1429	treatment_400	T8	LMOSA_10970	actA
R_170	252859	A	G	8	4	50	treatment_400	T9	LMOSA_10970	actA
R_181	252859	A	G	16	11	68.75	control_200	T1	LMOSA_10970	actA
R_184	252859	A	G	10	8	80	control_200	T1	LMOSA_10970	actA
R_189	252859	A	G	7	6	85.7143	control_200	T2	LMOSA_10970	actA
R_190	252859	A	G	12	7	58.3333	control_200	T2	LMOSA_10970	actA
R_191	252859	A	G	8	5	62.5	control_200	T2	LMOSA_10970	actA
R_198	252859	A	G	5	4	80	control_200	T3	LMOSA_10970	actA
R_200	252859	A	G	15	6	40	control_200	T3	LMOSA_10970	actA
R_205	252859	A	G	6	3	50	control_200	T4	LMOSA_10970	actA
R_214	252859	A	G	6	3	50	control_200	T5	LMOSA_10970	actA
R_215	252859	A	G	7	5	71.4286	control_200	T5	LMOSA_10970	actA
R_216	252859	A	G	9	5	55.5556	control_200	T5	LMOSA_10970	actA
R_222	252859	A	G	8	2	25	control_200	T6	LMOSA_10970	actA
R_223	252859	A	G	6	4	66.6667	control_200	T6	LMOSA_10970	actA
R_255	252859	A	G	17	10	58.8235	control_400	T1	LMOSA_10970	actA
R_256	252859	A	G	6	3	50	control_400	T1	LMOSA_10970	actA
R_257	252859	A	G	10	7	70	control_400	T1	LMOSA_10970	actA
R_264	252859	A	G	13	9	69.2308	control_400	T2	LMOSA_10970	actA
R_265	252859	A	G	6	5	83.3333	control_400	T2	LMOSA_10970	actA
R_266	252859	A	G	21	10	47.619	control_400	T2	LMOSA_10970	actA
R_275	252859	A	G	11	6	54.5455	control_400	T3	LMOSA_10970	actA
R_276	252859	A	G	18	11	61.1111	control_400	T3	LMOSA_10970	actA
R_282	252859	A	G	5	2	40	control_400	T4	LMOSA_10970	actA
R_285	252859	A	G	6	3	50	control_400	T4	LMOSA_10970	actA
R_290	252859	A	G	14	12	85.7143	control_400	T5	LMOSA_10970	actA
R_300	252859	A	G	20	17	85	control_400	T6	LMOSA_10970	actA
R_301	252859	A	G	20	5	25	control_400	T6	LMOSA_10970	actA
R_038	2548257	T	C	8	2	25	treatment_200	T3	LMOSA_3580	-
R_104	2548257	T	C	7	2	28.5714	treatment_400	T2	LMOSA_3580	-
R_122	2548257	T	C	4	2	50	treatment_400	T3	LMOSA_3580	-
R_152	2548257	T	C	8	4	50	treatment_400	T9	LMOSA_3580	-
R_158	2548257	T	C	6	2	33.3333	treatment_400	T8	LMOSA_3580	-
R_163	2548257	T	C	7	4	57.1429	treatment_400	T8	LMOSA_3580	-
R_172	2548257	T	C	8	4	50	treatment_400	T7	LMOSA_3580	-
R_004	257308	A	G	57	57	100	treatment_200	T1	LMOSA_11030	ldh
R_008	257308	A	G	28	28	100	treatment_200	T1	LMOSA_11030	ldh
R_012	257308	A	G	35	35	100	treatment_200	T2	LMOSA_11030	ldh
R_014	257308	A	G	23	23	100	treatment_200	T1	LMOSA_11030	ldh
R_016	257308	A	G	36	36	100	treatment_200	T2	LMOSA_11030	ldh
R_020	257308	A	G	23	23	100	treatment_200	T2	LMOSA_11030	ldh
R_024	257308	A	G	77	77	100	treatment_200	T3	LMOSA_11030	ldh
R_026	257308	A	G	44	44	100	treatment_200	T4	LMOSA_11030	ldh
R_028	257308	A	G	35	35	100	treatment_200	T3	LMOSA_11030	ldh
R_032	257308	A	G	37	37	100	treatment_200	T4	LMOSA_11030	ldh
R_036	257308	A	G	27	27	100	treatment_200	T4	LMOSA_11030	ldh
R_038	257308	A	G	31	31	100	treatment_200	T3	LMOSA_11030	ldh
R_044	257308	A	G	40	40	100	treatment_200	T5	LMOSA_11030	ldh
R_052	257308	A	G	61	61	100	treatment_200	T6	LMOSA_11030	ldh
R_054	257308	A	G	40	40	100	treatment_200	T5	LMOSA_11030	ldh
R_060	257308	A	G	56	56	100	treatment_200	T5	LMOSA_11030	ldh
R_062	257308	A	G	53	53	100	treatment_200	T6	LMOSA_11030	ldh
R_064	257308	A	G	45	45	100	treatment_200	T9	LMOSA_11030	ldh
R_068	257308	A	G	29	29	100	treatment_200	T6	LMOSA_11030	ldh
R_070	257308	A	G	25	25	100	treatment_200	T8	LMOSA_11030	ldh
R_072	257308	A	G	18	18	100	treatment_200	T7	LMOSA_11030	ldh
R_076	257308	A	G	46	46	100	treatment_200	T8	LMOSA_11030	ldh
R_078	257308	A	G	22	22	100	treatment_200	T7	LMOSA_11030	ldh
R_080	257308	A	G	79	79	100	treatment_200	T8	LMOSA_11030	ldh
R_082	257308	A	G	71	71	100	treatment_200	T9	LMOSA_11030	ldh
R_088	257308	A	G	44	44	100	treatment_200	T9	LMOSA_11030	ldh
R_091	257308	A	G	93	93	100	treatment_400	T1	LMOSA_11030	ldh
R_094	257308	A	G	44	44	100	treatment_400	T2	LMOSA_11030	ldh
R_096	257308	A	G	46	46	100	treatment_400	T1	LMOSA_11030	ldh
R_104	257308	A	G	90	90	100	treatment_400	T2	LMOSA_11030	ldh
R_106	257308	A	G	86	86	100	treatment_400	T1	LMOSA_11030	ldh
R_108	257308	A	G	45	45	100	treatment_400	T2	LMOSA_11030	ldh
R_111	257308	A	G	55	55	100	treatment_400	T3	LMOSA_11030	ldh
R_114	257308	A	G	81	81	100	treatment_400	T4	LMOSA_11030	ldh
R_116	257308	A	G	41	41	100	treatment_400	T3	LMOSA_11030	ldh
R_120	257308	A	G	55	55	100	treatment_400	T4	LMOSA_11030	ldh
R_122	257308	A	G	59	59	100	treatment_400	T3	LMOSA_11030	ldh
R_128	257308	A	G	70	70	100	treatment_400	T4	LMOSA_11030	ldh
R_136	257308	A	G	93	93	100	treatment_400	T5	LMOSA_11030	ldh
R_140	257308	A	G	49	49	100	treatment_400	T6	LMOSA_11030	ldh
R_142	257308	A	G	46	46	100	treatment_400	T5	LMOSA_11030	ldh
R_144	257308	A	G	55	55	100	treatment_400	T6	LMOSA_11030	ldh
R_146	257308	A	G	28	28	100	treatment_400	T9	LMOSA_11030	ldh
R_148	257308	A	G	21	21	100	treatment_400	T5	LMOSA_11030	ldh
R_150	257308	A	G	26	26	100	treatment_400	T6	LMOSA_11030	ldh
R_152	257308	A	G	66	66	100	treatment_400	T9	LMOSA_11030	ldh
R_158	257308	A	G	48	48	100	treatment_400	T8	LMOSA_11030	ldh
R_160	257308	A	G	39	39	100	treatment_400	T7	LMOSA_11030	ldh
R_163	257308	A	G	43	43	100	treatment_400	T8	LMOSA_11030	ldh
R_166	257308	A	G	56	56	100	treatment_400	T7	LMOSA_11030	ldh
R_168	257308	A	G	10	10	100	treatment_400	T8	LMOSA_11030	ldh
R_170	257308	A	G	50	50	100	treatment_400	T9	LMOSA_11030	ldh
R_172	257308	A	G	65	65	100	treatment_400	T7	LMOSA_11030	ldh
R_181	257308	A	G	92	92	100	control_200	T1	LMOSA_11030	ldh
R_183	257308	A	G	50	50	100	control_200	T1	LMOSA_11030	ldh
R_184	257308	A	G	82	82	100	control_200	T1	LMOSA_11030	ldh
R_189	257308	A	G	52	52	100	control_200	T2	LMOSA_11030	ldh
R_190	257308	A	G	35	35	100	control_200	T2	LMOSA_11030	ldh
R_191	257308	A	G	20	20	100	control_200	T2	LMOSA_11030	ldh
R_197	257308	A	G	55	55	100	control_200	T3	LMOSA_11030	ldh
R_198	257308	A	G	17	17	100	control_200	T3	LMOSA_11030	ldh
R_200	257308	A	G	26	26	100	control_200	T3	LMOSA_11030	ldh
R_205	257308	A	G	3	3	100	control_200	T4	LMOSA_11030	ldh
R_206	257308	A	G	14	14	100	control_200	T4	LMOSA_11030	ldh
R_208	257308	A	G	15	15	100	control_200	T4	LMOSA_11030	ldh
R_214	257308	A	G	29	29	100	control_200	T5	LMOSA_11030	ldh
R_215	257308	A	G	21	21	100	control_200	T5	LMOSA_11030	ldh
R_216	257308	A	G	20	20	100	control_200	T5	LMOSA_11030	ldh
R_222	257308	A	G	20	20	100	control_200	T6	LMOSA_11030	ldh
R_223	257308	A	G	13	13	100	control_200	T6	LMOSA_11030	ldh
R_224	257308	A	G	20	20	100	control_200	T6	LMOSA_11030	ldh
R_229	257308	A	G	18	18	100	control_200	T7	LMOSA_11030	ldh
R_230	257308	A	G	28	28	100	control_200	T7	LMOSA_11030	ldh
R_232	257308	A	G	19	19	100	control_200	T7	LMOSA_11030	ldh
R_237	257308	A	G	21	21	100	control_200	T8	LMOSA_11030	ldh
R_238	257308	A	G	33	33	100	control_200	T8	LMOSA_11030	ldh
R_240	257308	A	G	82	82	100	control_200	T8	LMOSA_11030	ldh
R_245	257308	A	G	12	12	100	control_200	T9	LMOSA_11030	ldh
R_246	257308	A	G	12	12	100	control_200	T9	LMOSA_11030	ldh
R_248	257308	A	G	29	29	100	control_200	T9	LMOSA_11030	ldh
R_255	257308	A	G	111	111	100	control_400	T1	LMOSA_11030	ldh
R_256	257308	A	G	39	39	100	control_400	T1	LMOSA_11030	ldh
R_257	257308	A	G	74	74	100	control_400	T1	LMOSA_11030	ldh
R_264	257308	A	G	94	94	100	control_400	T2	LMOSA_11030	ldh
R_265	257308	A	G	57	57	100	control_400	T2	LMOSA_11030	ldh
R_266	257308	A	G	130	130	100	control_400	T2	LMOSA_11030	ldh
R_274	257308	A	G	15	15	100	control_400	T3	LMOSA_11030	ldh
R_275	257308	A	G	50	50	100	control_400	T3	LMOSA_11030	ldh
R_276	257308	A	G	83	83	100	control_400	T3	LMOSA_11030	ldh
R_282	257308	A	G	23	23	100	control_400	T4	LMOSA_11030	ldh
R_284	257308	A	G	47	47	100	control_400	T4	LMOSA_11030	ldh
R_285	257308	A	G	22	22	100	control_400	T4	LMOSA_11030	ldh
R_290	257308	A	G	40	40	100	control_400	T5	LMOSA_11030	ldh
R_291	257308	A	G	38	38	100	control_400	T5	LMOSA_11030	ldh
R_292	257308	A	G	41	41	100	control_400	T5	LMOSA_11030	ldh
R_298	257308	A	G	28	28	100	control_400	T6	LMOSA_11030	ldh
R_300	257308	A	G	42	42	100	control_400	T6	LMOSA_11030	ldh
R_301	257308	A	G	71	71	100	control_400	T6	LMOSA_11030	ldh
R_306	257308	A	G	33	33	100	control_400	T7	LMOSA_11030	ldh
R_308	257308	A	G	24	24	100	control_400	T7	LMOSA_11030	ldh
R_309	257308	A	G	51	51	100	control_400	T7	LMOSA_11030	ldh
R_314	257308	A	G	15	15	100	control_400	T8	LMOSA_11030	ldh
R_316	257308	A	G	20	20	100	control_400	T8	LMOSA_11030	ldh
R_317	257308	A	G	36	36	100	control_400	T8	LMOSA_11030	ldh
R_322	257308	A	G	9	9	100	control_400	T9	LMOSA_11030	ldh
R_323	257308	A	G	19	19	100	control_400	T9	LMOSA_11030	ldh
R_325	257308	A	G	17	17	100	control_400	T9	LMOSA_11030	ldh
R_078	2607624	T	C	10	2	20	treatment_200	T7	LMOSA_4150	rnr
R_088	2607624	T	C	10	2	20	treatment_200	T9	LMOSA_4150	rnr
R_106	2607624	T	C	7	2	28.5714	treatment_400	T1	LMOSA_4150	rnr
R_111	2607624	T	C	9	3	33.3333	treatment_400	T3	LMOSA_4150	rnr
R_064	2619490	T	C	5	4	80	treatment_200	T9	LMOSA_4270	rpoN
R_080	2619490	T	C	12	3	25	treatment_200	T8	LMOSA_4270	rpoN
R_082	2619490	T	C	5	5	100	treatment_200	T9	LMOSA_4270	rpoN
R_150	2619490	T	C	8	3	37.5	treatment_400	T6	LMOSA_4270	rpoN
R_152	2619490	T	C	14	4	28.5714	treatment_400	T9	LMOSA_4270	rpoN
R_166	2619490	T	C	6	2	33.3333	treatment_400	T7	LMOSA_4270	rpoN
R_245	2619490	T	C	5	2	40	control_200	T9	LMOSA_4270	rpoN
R_248	2619490	T	C	8	2	25	control_200	T9	LMOSA_4270	rpoN
R_325	2619490	T	C	5	3	60	control_400	T9	LMOSA_4270	rpoN
R_020	2675586	T	C	113	25	22.1239	treatment_200	T2	LMOSA_4770	hpf
R_064	2675586	T	C	80	68	85	treatment_200	T9	LMOSA_4770	hpf
R_068	2675586	T	C	57	14	24.5614	treatment_200	T6	LMOSA_4770	hpf
R_070	2675586	T	C	59	38	64.4068	treatment_200	T8	LMOSA_4770	hpf
R_072	2675586	T	C	57	13	22.807	treatment_200	T7	LMOSA_4770	hpf
R_076	2675586	T	C	41	22	53.6585	treatment_200	T8	LMOSA_4770	hpf
R_078	2675586	T	C	55	17	30.9091	treatment_200	T7	LMOSA_4770	hpf
R_080	2675586	T	C	56	26	46.4286	treatment_200	T8	LMOSA_4770	hpf
R_082	2675586	T	C	44	39	88.6364	treatment_200	T9	LMOSA_4770	hpf
R_088	2675586	T	C	46	37	80.4348	treatment_200	T9	LMOSA_4770	hpf
R_146	2675586	T	C	80	65	81.25	treatment_400	T9	LMOSA_4770	hpf
R_148	2675586	T	C	118	27	22.8814	treatment_400	T5	LMOSA_4770	hpf
R_150	2675586	T	C	120	27	22.5	treatment_400	T6	LMOSA_4770	hpf
R_152	2675586	T	C	173	129	74.5665	treatment_400	T9	LMOSA_4770	hpf
R_158	2675586	T	C	198	102	51.5152	treatment_400	T8	LMOSA_4770	hpf
R_160	2675586	T	C	96	32	33.3333	treatment_400	T7	LMOSA_4770	hpf
R_163	2675586	T	C	120	66	55	treatment_400	T8	LMOSA_4770	hpf
R_166	2675586	T	C	133	61	45.8647	treatment_400	T7	LMOSA_4770	hpf
R_168	2675586	T	C	33	19	57.5758	treatment_400	T8	LMOSA_4770	hpf
R_170	2675586	T	C	124	93	75	treatment_400	T9	LMOSA_4770	hpf
R_172	2675586	T	C	172	62	36.0465	treatment_400	T7	LMOSA_4770	hpf
R_004	2715706	T	C	7	2	28.5714	treatment_200	T1	LMOSA_5200	-
R_008	2715706	T	C	8	2	25	treatment_200	T1	LMOSA_5200	-
R_024	2715706	T	C	5	2	40	treatment_200	T3	LMOSA_5200	-
R_032	2715706	T	C	14	3	21.4286	treatment_200	T4	LMOSA_5200	-
R_044	2715706	T	C	14	3	21.4286	treatment_200	T5	LMOSA_5200	-
R_064	2715706	T	C	10	3	30	treatment_200	T9	LMOSA_5200	-
R_082	2715706	T	C	21	4	19.0476	treatment_200	T9	LMOSA_5200	-
R_088	2715706	T	C	9	3	33.3333	treatment_200	T9	LMOSA_5200	-
R_140	2715706	T	C	5	3	60	treatment_400	T6	LMOSA_5200	-
R_191	2715706	T	C	13	3	23.0769	control_200	T2	LMOSA_5200	-
R_314	2715706	T	C	15	4	26.6667	control_400	T8	LMOSA_5200	-
R_082	2746436	T	C	20	6	30	treatment_200	T9	LMOSA_5520	-
R_108	2746436	T	C	5	2	40	treatment_400	T2	LMOSA_5520	-
R_168	2746436	T	C	6	2	33.3333	treatment_400	T8	LMOSA_5520	-
R_080	2867172	T	C	42	9	21.4286	treatment_200	T8	LMOSA_6810	-
R_082	2867172	T	C	50	15	30	treatment_200	T9	LMOSA_6810	-
R_146	2867172	T	C	45	15	33.3333	treatment_400	T9	LMOSA_6810	-
R_170	2867172	T	C	85	28	32.9412	treatment_400	T9	LMOSA_6810	-
R_080	2996208	T	C	12	3	25	treatment_200	T8	LMOSA_7990	glxK
R_082	2996208	T	C	27	8	29.6296	treatment_200	T9	LMOSA_7990	glxK
R_088	2996208	T	C	14	3	21.4286	treatment_200	T9	LMOSA_7990	glxK
R_152	2996208	T	C	12	3	25	treatment_400	T9	LMOSA_7990	glxK
R_172	2996208	T	C	12	3	25	treatment_400	T7	LMOSA_7990	glxK
R_020	320780	A	G	5	2	40	treatment_200	T2	LMOSA_11570	rpoB
R_082	320780	A	G	9	4	44.4444	treatment_200	T9	LMOSA_11570	rpoB
R_111	320780	A	G	4	2	50	treatment_400	T3	LMOSA_11570	rpoB
R_144	320780	A	G	7	2	28.5714	treatment_400	T6	LMOSA_11570	rpoB
R_152	320780	A	G	9	6	66.6667	treatment_400	T9	LMOSA_11570	rpoB
R_298	320780	A	G	7	2	28.5714	control_400	T6	LMOSA_11570	rpoB
R_140	403379	A	G	4	3	75	treatment_400	T6	LMOSA_12240	-
R_144	403379	A	G	4	3	75	treatment_400	T6	LMOSA_12240	-
R_181	403379	A	G	7	5	71.4286	control_200	T1	LMOSA_12240	-
R_198	403379	A	G	4	2	50	control_200	T3	LMOSA_12240	-
R_255	403379	A	G	4	2	50	control_400	T1	LMOSA_12240	-
R_257	403379	A	G	6	2	33.3333	control_400	T1	LMOSA_12240	-
R_290	403379	A	G	5	3	60	control_400	T5	LMOSA_12240	-
R_300	403379	A	G	4	2	50	control_400	T6	LMOSA_12240	-
R_104	51567	A	G	4	2	50	treatment_400	T2	LMOSA_8740	aguA
R_158	51567	A	G	6	2	33.3333	treatment_400	T8	LMOSA_8740	aguA
R_190	51567	A	G	6	2	33.3333	control_200	T2	LMOSA_8740	aguA
R_016	568103	A	G	4	2	50	treatment_200	T2	LMOSA_13830	dhaS
R_020	568103	A	G	8	4	50	treatment_200	T2	LMOSA_13830	dhaS
R_052	568103	A	G	4	3	75	treatment_200	T6	LMOSA_13830	dhaS
R_064	568103	A	G	4	3	75	treatment_200	T9	LMOSA_13830	dhaS
R_076	568103	A	G	4	4	100	treatment_200	T8	LMOSA_13830	dhaS
R_080	568103	A	G	7	7	100	treatment_200	T8	LMOSA_13830	dhaS
R_082	568103	A	G	4	4	100	treatment_200	T9	LMOSA_13830	dhaS
R_104	568103	A	G	8	4	50	treatment_400	T2	LMOSA_13830	dhaS
R_108	568103	A	G	5	4	80	treatment_400	T2	LMOSA_13830	dhaS
R_128	568103	A	G	5	2	40	treatment_400	T4	LMOSA_13830	dhaS
R_148	568103	A	G	7	2	28.5714	treatment_400	T5	LMOSA_13830	dhaS
R_158	568103	A	G	7	6	85.7143	treatment_400	T8	LMOSA_13830	dhaS
R_172	568103	A	G	6	5	83.3333	treatment_400	T7	LMOSA_13830	dhaS
R_181	568103	A	G	14	8	57.1429	control_200	T1	LMOSA_13830	dhaS
R_183	568103	A	G	13	7	53.8462	control_200	T1	LMOSA_13830	dhaS
R_184	568103	A	G	10	6	60	control_200	T1	LMOSA_13830	dhaS
R_189	568103	A	G	12	10	83.3333	control_200	T2	LMOSA_13830	dhaS
R_190	568103	A	G	6	3	50	control_200	T2	LMOSA_13830	dhaS
R_191	568103	A	G	6	4	66.6667	control_200	T2	LMOSA_13830	dhaS
R_197	568103	A	G	8	8	100	control_200	T3	LMOSA_13830	dhaS
R_200	568103	A	G	19	11	57.8947	control_200	T3	LMOSA_13830	dhaS
R_255	568103	A	G	12	4	33.3333	control_400	T1	LMOSA_13830	dhaS
R_257	568103	A	G	12	5	41.6667	control_400	T1	LMOSA_13830	dhaS
R_264	568103	A	G	7	2	28.5714	control_400	T2	LMOSA_13830	dhaS
R_266	568103	A	G	11	6	54.5455	control_400	T2	LMOSA_13830	dhaS
R_275	568103	A	G	4	2	50	control_400	T3	LMOSA_13830	dhaS
R_276	568103	A	G	6	3	50	control_400	T3	LMOSA_13830	dhaS
R_290	568103	A	G	5	2	40	control_400	T5	LMOSA_13830	dhaS
R_291	568103	A	G	7	3	42.8571	control_400	T5	LMOSA_13830	dhaS
R_292	568103	A	G	8	3	37.5	control_400	T5	LMOSA_13830	dhaS
R_300	568103	A	G	6	2	33.3333	control_400	T6	LMOSA_13830	dhaS
R_301	568103	A	G	13	5	38.4615	control_400	T6	LMOSA_13830	dhaS
R_314	568103	A	G	7	4	57.1429	control_400	T8	LMOSA_13830	dhaS
R_317	568103	A	G	9	6	66.6667	control_400	T8	LMOSA_13830	dhaS
R_064	575176	A	G	5	3	60	treatment_200	T9	LMOSA_13910	ydjA
R_076	575176	A	G	4	2	50	treatment_200	T8	LMOSA_13910	ydjA
R_240	575176	A	G	6	2	33.3333	control_200	T8	LMOSA_13910	ydjA
R_076	629927	A	G	48	7	14.5833	treatment_200	T8	LMOSA_14440	-
R_146	629927	A	G	54	12	22.2222	treatment_400	T9	LMOSA_14440	-
R_152	629927	A	G	136	33	24.2647	treatment_400	T9	LMOSA_14440	-
R_064	720351	A	G	10	3	30	treatment_200	T9	intergenic_region	intergenic_region
R_080	720351	A	G	7	4	57.1429	treatment_200	T8	intergenic_region	intergenic_region
R_082	720351	A	G	7	2	28.5714	treatment_200	T9	intergenic_region	intergenic_region
R_088	720351	A	G	4	2	50	treatment_200	T9	intergenic_region	intergenic_region
R_146	720351	A	G	6	4	66.6667	treatment_400	T9	intergenic_region	intergenic_region
R_150	720351	A	G	8	2	25	treatment_400	T6	intergenic_region	intergenic_region
R_152	720351	A	G	7	5	71.4286	treatment_400	T9	intergenic_region	intergenic_region
R_158	720351	A	G	5	4	80	treatment_400	T8	intergenic_region	intergenic_region
R_166	720351	A	G	4	2	50	treatment_400	T7	intergenic_region	intergenic_region
R_170	720351	A	G	6	3	50	treatment_400	T9	intergenic_region	intergenic_region
