# Supplementary material for: RNA editing, RNA modifications, and transcriptional units in Listeria monocytogenes
Source: Research Square preprint supplement (doi:10.21203/rs.3.rs-1530110/v1), 2022-04-21
Supplement: Supplementary file 14 [file 7f0c8401d1dc2dd031d3950d.xlsx]

## Sheet: EGD-e_TSS
Table S1. Positions of published TSS locations lifted from EGD-e to RO15 genome. Five sheets: 1) EGD-e_TSS: TSS positions of EGD-e on EGD-e genome reported by Wurtzel et al. [21] 2) EGD-e_Lifted_mapped: TSS positions of EGD-e on RO15 genome lifted using LASTZ and Crossmap. 3) TSS positions of EGD-e that were not mapped to RO15 genome. 4) TSS positions of RO15 predicted by ANNOgesic tool. 5) TSS p…
Wurtzel et al. EGD-e TSS positions
Positions (start,end) in EGD-e genome
##gff-version3
seqid	source	type	start	end	score	strand	phase	attributes
NC_003210.1	Wurtzel_et_al	TSS	1000409	1000409	.	+	.	Name=TSS1
NC_003210.1	Wurtzel_et_al	TSS	1001467	1001467	.	+	.	Name=TSS2
NC_003210.1	Wurtzel_et_al	TSS	1003609	1003609	.	-	.	Name=TSS3
NC_003210.1	Wurtzel_et_al	TSS	1006810	1006810	.	-	.	Name=TSS4
NC_003210.1	Wurtzel_et_al	TSS	1006917	1006917	.	+	.	Name=TSS5
NC_003210.1	Wurtzel_et_al	TSS	1007804	1007804	.	-	.	Name=TSS6
NC_003210.1	Wurtzel_et_al	TSS	1008937	1008937	.	-	.	Name=TSS7
NC_003210.1	Wurtzel_et_al	TSS	1009058	1009058	.	+	.	Name=TSS8
NC_003210.1	Wurtzel_et_al	TSS	1010237	1010237	.	+	.	Name=TSS9
NC_003210.1	Wurtzel_et_al	TSS	1013356	1013356	.	-	.	Name=TSS10
NC_003210.1	Wurtzel_et_al	TSS	1013446	1013446	.	+	.	Name=TSS11
NC_003210.1	Wurtzel_et_al	TSS	1015135	1015135	.	+	.	Name=TSS12
NC_003210.1	Wurtzel_et_al	TSS	1017841	1017841	.	+	.	Name=TSS13
NC_003210.1	Wurtzel_et_al	TSS	1019517	1019517	.	+	.	Name=TSS14
NC_003210.1	Wurtzel_et_al	TSS	1021442	1021442	.	+	.	Name=TSS15
NC_003210.1	Wurtzel_et_al	TSS	1022521	1022521	.	+	.	Name=TSS16
NC_003210.1	Wurtzel_et_al	TSS	1025156	1025156	.	-	.	Name=TSS17
NC_003210.1	Wurtzel_et_al	TSS	1026349	1026349	.	+	.	Name=TSS18
NC_003210.1	Wurtzel_et_al	TSS	1029110	1029110	.	-	.	Name=TSS19
NC_003210.1	Wurtzel_et_al	TSS	1029852	1029852	.	-	.	Name=TSS20
NC_003210.1	Wurtzel_et_al	TSS	1029948	1029948	.	+	.	Name=TSS21
NC_003210.1	Wurtzel_et_al	TSS	103156	103156	.	+	.	Name=TSS22
NC_003210.1	Wurtzel_et_al	TSS	1032253	1032253	.	-	.	Name=TSS23
NC_003210.1	Wurtzel_et_al	TSS	1032628	1032628	.	-	.	Name=TSS24
NC_003210.1	Wurtzel_et_al	TSS	1032846	1032846	.	+	.	Name=TSS25
NC_003210.1	Wurtzel_et_al	TSS	1034992	1034992	.	+	.	Name=TSS26
NC_003210.1	Wurtzel_et_al	TSS	1038276	1038276	.	+	.	Name=TSS27
NC_003210.1	Wurtzel_et_al	TSS	1038736	1038736	.	+	.	Name=TSS28
NC_003210.1	Wurtzel_et_al	TSS	1039220	1039220	.	+	.	Name=TSS29
NC_003210.1	Wurtzel_et_al	TSS	1040644	1040644	.	+	.	Name=TSS30
NC_003210.1	Wurtzel_et_al	TSS	104111	104111	.	+	.	Name=TSS31
NC_003210.1	Wurtzel_et_al	TSS	1043515	1043515	.	-	.	Name=TSS32
NC_003210.1	Wurtzel_et_al	TSS	1043739	1043739	.	+	.	Name=TSS33
NC_003210.1	Wurtzel_et_al	TSS	1046857	1046857	.	+	.	Name=TSS34
NC_003210.1	Wurtzel_et_al	TSS	1047462	1047462	.	+	.	Name=TSS35
NC_003210.1	Wurtzel_et_al	TSS	1050345	1050345	.	+	.	Name=TSS36
NC_003210.1	Wurtzel_et_al	TSS	1051778	1051778	.	+	.	Name=TSS37
NC_003210.1	Wurtzel_et_al	TSS	1052472	1052472	.	+	.	Name=TSS38
NC_003210.1	Wurtzel_et_al	TSS	1057348	1057348	.	-	.	Name=TSS39
NC_003210.1	Wurtzel_et_al	TSS	1057719	1057719	.	+	.	Name=TSS40
NC_003210.1	Wurtzel_et_al	TSS	1059639	1059639	.	-	.	Name=TSS41
NC_003210.1	Wurtzel_et_al	TSS	106955	106955	.	+	.	Name=TSS42
NC_003210.1	Wurtzel_et_al	TSS	10697	10697	.	+	.	Name=TSS43
NC_003210.1	Wurtzel_et_al	TSS	1070519	1070519	.	-	.	Name=TSS44
NC_003210.1	Wurtzel_et_al	TSS	1070575	1070575	.	+	.	Name=TSS45
NC_003210.1	Wurtzel_et_al	TSS	1071419	1071419	.	+	.	Name=TSS46
NC_003210.1	Wurtzel_et_al	TSS	107478	107478	.	+	.	Name=TSS47
NC_003210.1	Wurtzel_et_al	TSS	1076875	1076875	.	-	.	Name=TSS48
NC_003210.1	Wurtzel_et_al	TSS	1076964	1076964	.	+	.	Name=TSS49
NC_003210.1	Wurtzel_et_al	TSS	1078174	1078174	.	-	.	Name=TSS50
NC_003210.1	Wurtzel_et_al	TSS	1078743	1078743	.	+	.	Name=TSS51
NC_003210.1	Wurtzel_et_al	TSS	1081085	1081085	.	+	.	Name=TSS52
NC_003210.1	Wurtzel_et_al	TSS	108208	108208	.	-	.	Name=TSS53
NC_003210.1	Wurtzel_et_al	TSS	1084371	1084371	.	+	.	Name=TSS54
NC_003210.1	Wurtzel_et_al	TSS	1084826	1084826	.	+	.	Name=TSS55
NC_003210.1	Wurtzel_et_al	TSS	1086755	1086755	.	+	.	Name=TSS56
NC_003210.1	Wurtzel_et_al	TSS	1092215	1092215	.	-	.	Name=TSS57
NC_003210.1	Wurtzel_et_al	TSS	1092896	1092896	.	-	.	Name=TSS58
NC_003210.1	Wurtzel_et_al	TSS	1092974	1092974	.	+	.	Name=TSS59
NC_003210.1	Wurtzel_et_al	TSS	109321	109321	.	+	.	Name=TSS60
NC_003210.1	Wurtzel_et_al	TSS	1093855	1093855	.	+	.	Name=TSS61
NC_003210.1	Wurtzel_et_al	TSS	1095952	1095952	.	+	.	Name=TSS62
NC_003210.1	Wurtzel_et_al	TSS	1097132	1097132	.	-	.	Name=TSS63
NC_003210.1	Wurtzel_et_al	TSS	1097240	1097240	.	+	.	Name=TSS64
NC_003210.1	Wurtzel_et_al	TSS	1097738	1097738	.	+	.	Name=TSS65
NC_003210.1	Wurtzel_et_al	TSS	109866	109866	.	+	.	Name=TSS66
NC_003210.1	Wurtzel_et_al	TSS	1099148	1099148	.	+	.	Name=TSS67
NC_003210.1	Wurtzel_et_al	TSS	110133	110133	.	+	.	Name=TSS68
NC_003210.1	Wurtzel_et_al	TSS	1101798	1101798	.	+	.	Name=TSS69
NC_003210.1	Wurtzel_et_al	TSS	1102148	1102148	.	+	.	Name=TSS70
NC_003210.1	Wurtzel_et_al	TSS	1106006	1106006	.	+	.	Name=TSS71
NC_003210.1	Wurtzel_et_al	TSS	1110601	1110601	.	-	.	Name=TSS72
NC_003210.1	Wurtzel_et_al	TSS	1110743	1110743	.	+	.	Name=TSS73
NC_003210.1	Wurtzel_et_al	TSS	1112017	1112017	.	+	.	Name=TSS74
NC_003210.1	Wurtzel_et_al	TSS	1113735	1113735	.	+	.	Name=TSS75
NC_003210.1	Wurtzel_et_al	TSS	1118992	1118992	.	+	.	Name=TSS76
NC_003210.1	Wurtzel_et_al	TSS	1121064	1121064	.	+	.	Name=TSS77
NC_003210.1	Wurtzel_et_al	TSS	112359	112359	.	+	.	Name=TSS78
NC_003210.1	Wurtzel_et_al	TSS	1126655	1126655	.	+	.	Name=TSS79
NC_003210.1	Wurtzel_et_al	TSS	1127929	1127929	.	+	.	Name=TSS80
NC_003210.1	Wurtzel_et_al	TSS	1129898	1129898	.	+	.	Name=TSS81
NC_003210.1	Wurtzel_et_al	TSS	1130253	1130253	.	+	.	Name=TSS82
NC_003210.1	Wurtzel_et_al	TSS	1136642	1136642	.	-	.	Name=TSS83
NC_003210.1	Wurtzel_et_al	TSS	1137917	1137917	.	-	.	Name=TSS84
NC_003210.1	Wurtzel_et_al	TSS	1152963	1152963	.	+	.	Name=TSS85
NC_003210.1	Wurtzel_et_al	TSS	1153822	1153822	.	+	.	Name=TSS86
NC_003210.1	Wurtzel_et_al	TSS	1157289	1157289	.	-	.	Name=TSS87
NC_003210.1	Wurtzel_et_al	TSS	1160115	1160115	.	+	.	Name=TSS88
NC_003210.1	Wurtzel_et_al	TSS	1164117	1164117	.	+	.	Name=TSS89
NC_003210.1	Wurtzel_et_al	TSS	1167989	1167989	.	+	.	Name=TSS90
NC_003210.1	Wurtzel_et_al	TSS	116938	116938	.	+	.	Name=TSS91
NC_003210.1	Wurtzel_et_al	TSS	1172688	1172688	.	-	.	Name=TSS92
NC_003210.1	Wurtzel_et_al	TSS	1173620	1173620	.	+	.	Name=TSS93
NC_003210.1	Wurtzel_et_al	TSS	1174216	1174216	.	+	.	Name=TSS94
NC_003210.1	Wurtzel_et_al	TSS	1176272	1176272	.	+	.	Name=TSS95
NC_003210.1	Wurtzel_et_al	TSS	1181075	1181075	.	-	.	Name=TSS96
NC_003210.1	Wurtzel_et_al	TSS	119045	119045	.	+	.	Name=TSS97
NC_003210.1	Wurtzel_et_al	TSS	1195985	1195985	.	+	.	Name=TSS98
NC_003210.1	Wurtzel_et_al	TSS	121152	121152	.	-	.	Name=TSS99
NC_003210.1	Wurtzel_et_al	TSS	1213983	1213983	.	+	.	Name=TSS100
NC_003210.1	Wurtzel_et_al	TSS	121471	121471	.	-	.	Name=TSS101
NC_003210.1	Wurtzel_et_al	TSS	121570	121570	.	+	.	Name=TSS102
NC_003210.1	Wurtzel_et_al	TSS	1215705	1215705	.	-	.	Name=TSS103
NC_003210.1	Wurtzel_et_al	TSS	122577	122577	.	+	.	Name=TSS104
NC_003210.1	Wurtzel_et_al	TSS	1231165	1231165	.	+	.	Name=TSS105
NC_003210.1	Wurtzel_et_al	TSS	123196	123196	.	+	.	Name=TSS106
NC_003210.1	Wurtzel_et_al	TSS	1233372	1233372	.	-	.	Name=TSS107
NC_003210.1	Wurtzel_et_al	TSS	1233398	1233398	.	-	.	Name=TSS108
NC_003210.1	Wurtzel_et_al	TSS	1233840	1233840	.	-	.	Name=TSS109
NC_003210.1	Wurtzel_et_al	TSS	1234437	1234437	.	+	.	Name=TSS110
NC_003210.1	Wurtzel_et_al	TSS	1235634	1235634	.	+	.	Name=TSS111
NC_003210.1	Wurtzel_et_al	TSS	1237909	1237909	.	+	.	Name=TSS112
NC_003210.1	Wurtzel_et_al	TSS	1239035	1239035	.	+	.	Name=TSS113
NC_003210.1	Wurtzel_et_al	TSS	1240230	1240230	.	-	.	Name=TSS114
NC_003210.1	Wurtzel_et_al	TSS	1240345	1240345	.	+	.	Name=TSS115
NC_003210.1	Wurtzel_et_al	TSS	1240764	1240764	.	+	.	Name=TSS116
NC_003210.1	Wurtzel_et_al	TSS	1244641	1244641	.	+	.	Name=TSS117
NC_003210.1	Wurtzel_et_al	TSS	1248871	1248871	.	+	.	Name=TSS118
NC_003210.1	Wurtzel_et_al	TSS	1252639	1252639	.	+	.	Name=TSS119
NC_003210.1	Wurtzel_et_al	TSS	1254325	1254325	.	-	.	Name=TSS120
NC_003210.1	Wurtzel_et_al	TSS	1254419	1254419	.	+	.	Name=TSS121
NC_003210.1	Wurtzel_et_al	TSS	1259502	1259502	.	+	.	Name=TSS122
NC_003210.1	Wurtzel_et_al	TSS	1261879	1261879	.	+	.	Name=TSS123
NC_003210.1	Wurtzel_et_al	TSS	1263477	1263477	.	-	.	Name=TSS124
NC_003210.1	Wurtzel_et_al	TSS	1263663	1263663	.	-	.	Name=TSS125
NC_003210.1	Wurtzel_et_al	TSS	1263784	1263784	.	+	.	Name=TSS126
NC_003210.1	Wurtzel_et_al	TSS	1266040	1266040	.	+	.	Name=TSS127
NC_003210.1	Wurtzel_et_al	TSS	1266675	1266675	.	+	.	Name=TSS128
NC_003210.1	Wurtzel_et_al	TSS	1267080	1267080	.	+	.	Name=TSS129
NC_003210.1	Wurtzel_et_al	TSS	1269158	1269158	.	-	.	Name=TSS130
NC_003210.1	Wurtzel_et_al	TSS	1269717	1269717	.	-	.	Name=TSS131
NC_003210.1	Wurtzel_et_al	TSS	1269809	1269809	.	+	.	Name=TSS132
NC_003210.1	Wurtzel_et_al	TSS	1270832	1270832	.	+	.	Name=TSS133
NC_003210.1	Wurtzel_et_al	TSS	1272690	1272690	.	+	.	Name=TSS134
NC_003210.1	Wurtzel_et_al	TSS	1274835	1274835	.	+	.	Name=TSS135
NC_003210.1	Wurtzel_et_al	TSS	1276834	1276834	.	-	.	Name=TSS136
NC_003210.1	Wurtzel_et_al	TSS	1277846	1277846	.	+	.	Name=TSS137
NC_003210.1	Wurtzel_et_al	TSS	1279827	1279827	.	-	.	Name=TSS138
NC_003210.1	Wurtzel_et_al	TSS	1281244	1281244	.	-	.	Name=TSS139
NC_003210.1	Wurtzel_et_al	TSS	1281306	1281306	.	+	.	Name=TSS140
NC_003210.1	Wurtzel_et_al	TSS	1282301	1282301	.	-	.	Name=TSS141
NC_003210.1	Wurtzel_et_al	TSS	1282450	1282450	.	+	.	Name=TSS142
NC_003210.1	Wurtzel_et_al	TSS	1284706	1284706	.	-	.	Name=TSS143
NC_003210.1	Wurtzel_et_al	TSS	1285503	1285503	.	-	.	Name=TSS144
NC_003210.1	Wurtzel_et_al	TSS	1286783	1286783	.	-	.	Name=TSS145
NC_003210.1	Wurtzel_et_al	TSS	1287242	1287242	.	-	.	Name=TSS146
NC_003210.1	Wurtzel_et_al	TSS	1287341	1287341	.	+	.	Name=TSS147
NC_003210.1	Wurtzel_et_al	TSS	12875	12875	.	+	.	Name=TSS148
NC_003210.1	Wurtzel_et_al	TSS	1289148	1289148	.	+	.	Name=TSS149
NC_003210.1	Wurtzel_et_al	TSS	1290175	1290175	.	+	.	Name=TSS150
NC_003210.1	Wurtzel_et_al	TSS	1291651	1291651	.	+	.	Name=TSS151
NC_003210.1	Wurtzel_et_al	TSS	1293062	1293062	.	+	.	Name=TSS152
NC_003210.1	Wurtzel_et_al	TSS	1294331	1294331	.	+	.	Name=TSS153
NC_003210.1	Wurtzel_et_al	TSS	1297706	1297706	.	+	.	Name=TSS154
NC_003210.1	Wurtzel_et_al	TSS	1300028	1300028	.	+	.	Name=TSS155
NC_003210.1	Wurtzel_et_al	TSS	1301532	1301532	.	+	.	Name=TSS156
NC_003210.1	Wurtzel_et_al	TSS	1302913	1302913	.	+	.	Name=TSS157
NC_003210.1	Wurtzel_et_al	TSS	1303985	1303985	.	+	.	Name=TSS158
NC_003210.1	Wurtzel_et_al	TSS	1305309	1305309	.	+	.	Name=TSS159
NC_003210.1	Wurtzel_et_al	TSS	1307098	1307098	.	-	.	Name=TSS160
NC_003210.1	Wurtzel_et_al	TSS	1307640	1307640	.	-	.	Name=TSS161
NC_003210.1	Wurtzel_et_al	TSS	1307739	1307739	.	+	.	Name=TSS162
NC_003210.1	Wurtzel_et_al	TSS	1308288	1308288	.	+	.	Name=TSS163
NC_003210.1	Wurtzel_et_al	TSS	1312837	1312837	.	+	.	Name=TSS164
NC_003210.1	Wurtzel_et_al	TSS	1319544	1319544	.	-	.	Name=TSS165
NC_003210.1	Wurtzel_et_al	TSS	1319651	1319651	.	+	.	Name=TSS166
NC_003210.1	Wurtzel_et_al	TSS	1322389	1322389	.	+	.	Name=TSS167
NC_003210.1	Wurtzel_et_al	TSS	1323371	1323371	.	+	.	Name=TSS168
NC_003210.1	Wurtzel_et_al	TSS	1323771	1323771	.	+	.	Name=TSS169
NC_003210.1	Wurtzel_et_al	TSS	1326401	1326401	.	+	.	Name=TSS170
NC_003210.1	Wurtzel_et_al	TSS	1328316	1328316	.	+	.	Name=TSS171
NC_003210.1	Wurtzel_et_al	TSS	1330894	1330894	.	-	.	Name=TSS172
NC_003210.1	Wurtzel_et_al	TSS	1330981	1330981	.	+	.	Name=TSS173
NC_003210.1	Wurtzel_et_al	TSS	1331383	1331383	.	+	.	Name=TSS174
NC_003210.1	Wurtzel_et_al	TSS	1331780	1331780	.	+	.	Name=TSS175
NC_003210.1	Wurtzel_et_al	TSS	1333997	1333997	.	+	.	Name=TSS176
NC_003210.1	Wurtzel_et_al	TSS	1336244	1336244	.	-	.	Name=TSS177
NC_003210.1	Wurtzel_et_al	TSS	133827	133827	.	-	.	Name=TSS178
NC_003210.1	Wurtzel_et_al	TSS	133908	133908	.	+	.	Name=TSS179
NC_003210.1	Wurtzel_et_al	TSS	1339539	1339539	.	+	.	Name=TSS180
NC_003210.1	Wurtzel_et_al	TSS	1341068	1341068	.	+	.	Name=TSS181
NC_003210.1	Wurtzel_et_al	TSS	1346927	1346927	.	+	.	Name=TSS182
NC_003210.1	Wurtzel_et_al	TSS	1351334	1351334	.	+	.	Name=TSS183
NC_003210.1	Wurtzel_et_al	TSS	1356314	1356314	.	+	.	Name=TSS184
NC_003210.1	Wurtzel_et_al	TSS	1357722	1357722	.	+	.	Name=TSS185
NC_003210.1	Wurtzel_et_al	TSS	1358748	1358748	.	+	.	Name=TSS186
NC_003210.1	Wurtzel_et_al	TSS	1359249	1359249	.	+	.	Name=TSS187
NC_003210.1	Wurtzel_et_al	TSS	1362710	1362710	.	-	.	Name=TSS188
NC_003210.1	Wurtzel_et_al	TSS	1363265	1363265	.	-	.	Name=TSS189
NC_003210.1	Wurtzel_et_al	TSS	136332	136332	.	-	.	Name=TSS190
NC_003210.1	Wurtzel_et_al	TSS	1363661	1363661	.	-	.	Name=TSS191
NC_003210.1	Wurtzel_et_al	TSS	1363782	1363782	.	+	.	Name=TSS192
NC_003210.1	Wurtzel_et_al	TSS	136438	136438	.	+	.	Name=TSS193
NC_003210.1	Wurtzel_et_al	TSS	1364641	1364641	.	+	.	Name=TSS194
NC_003210.1	Wurtzel_et_al	TSS	1366457	1366457	.	+	.	Name=TSS195
NC_003210.1	Wurtzel_et_al	TSS	136710	136710	.	+	.	Name=TSS196
NC_003210.1	Wurtzel_et_al	TSS	1367537	1367537	.	+	.	Name=TSS197
NC_003210.1	Wurtzel_et_al	TSS	137100	137100	.	+	.	Name=TSS198
NC_003210.1	Wurtzel_et_al	TSS	1372810	1372810	.	+	.	Name=TSS199
NC_003210.1	Wurtzel_et_al	TSS	1377395	1377395	.	-	.	Name=TSS200
NC_003210.1	Wurtzel_et_al	TSS	1378688	1378688	.	-	.	Name=TSS201
NC_003210.1	Wurtzel_et_al	TSS	1378779	1378779	.	+	.	Name=TSS202
NC_003210.1	Wurtzel_et_al	TSS	1379944	1379944	.	+	.	Name=TSS203
NC_003210.1	Wurtzel_et_al	TSS	1380665	1380665	.	+	.	Name=TSS204
NC_003210.1	Wurtzel_et_al	TSS	1381201	1381201	.	+	.	Name=TSS205
NC_003210.1	Wurtzel_et_al	TSS	1383001	1383001	.	+	.	Name=TSS206
NC_003210.1	Wurtzel_et_al	TSS	1386904	1386904	.	+	.	Name=TSS207
NC_003210.1	Wurtzel_et_al	TSS	1387327	1387327	.	+	.	Name=TSS208
NC_003210.1	Wurtzel_et_al	TSS	1390195	1390195	.	+	.	Name=TSS209
NC_003210.1	Wurtzel_et_al	TSS	1392436	1392436	.	+	.	Name=TSS210
NC_003210.1	Wurtzel_et_al	TSS	1397730	1397730	.	+	.	Name=TSS211
NC_003210.1	Wurtzel_et_al	TSS	1400862	1400862	.	+	.	Name=TSS212
NC_003210.1	Wurtzel_et_al	TSS	1402510	1402510	.	+	.	Name=TSS213
NC_003210.1	Wurtzel_et_al	TSS	1405892	1405892	.	-	.	Name=TSS214
NC_003210.1	Wurtzel_et_al	TSS	1406255	1406255	.	-	.	Name=TSS215
NC_003210.1	Wurtzel_et_al	TSS	1406338	1406338	.	+	.	Name=TSS216
NC_003210.1	Wurtzel_et_al	TSS	1406643	1406643	.	+	.	Name=TSS217
NC_003210.1	Wurtzel_et_al	TSS	1408878	1408878	.	-	.	Name=TSS218
NC_003210.1	Wurtzel_et_al	TSS	1408992	1408992	.	+	.	Name=TSS219
NC_003210.1	Wurtzel_et_al	TSS	1410076	1410076	.	+	.	Name=TSS220
NC_003210.1	Wurtzel_et_al	TSS	141013	141013	.	+	.	Name=TSS221
NC_003210.1	Wurtzel_et_al	TSS	1413316	1413316	.	-	.	Name=TSS222
NC_003210.1	Wurtzel_et_al	TSS	1413513	1413513	.	+	.	Name=TSS223
NC_003210.1	Wurtzel_et_al	TSS	1415034	1415034	.	+	.	Name=TSS224
NC_003210.1	Wurtzel_et_al	TSS	1418773	1418773	.	+	.	Name=TSS225
NC_003210.1	Wurtzel_et_al	TSS	1421426	1421426	.	+	.	Name=TSS226
NC_003210.1	Wurtzel_et_al	TSS	142430	142430	.	+	.	Name=TSS227
NC_003210.1	Wurtzel_et_al	TSS	1425339	1425339	.	+	.	Name=TSS228
NC_003210.1	Wurtzel_et_al	TSS	1426598	1426598	.	+	.	Name=TSS229
NC_003210.1	Wurtzel_et_al	TSS	1426971	1426971	.	+	.	Name=TSS230
NC_003210.1	Wurtzel_et_al	TSS	1428416	1428416	.	+	.	Name=TSS231
NC_003210.1	Wurtzel_et_al	TSS	1430208	1430208	.	+	.	Name=TSS232
NC_003210.1	Wurtzel_et_al	TSS	1435565	1435565	.	+	.	Name=TSS233
NC_003210.1	Wurtzel_et_al	TSS	1437880	1437880	.	+	.	Name=TSS234
NC_003210.1	Wurtzel_et_al	TSS	1439387	1439387	.	+	.	Name=TSS235
NC_003210.1	Wurtzel_et_al	TSS	1445066	1445066	.	-	.	Name=TSS236
NC_003210.1	Wurtzel_et_al	TSS	1451239	1451239	.	-	.	Name=TSS237
NC_003210.1	Wurtzel_et_al	TSS	1451780	1451780	.	+	.	Name=TSS238
NC_003210.1	Wurtzel_et_al	TSS	1455215	1455215	.	-	.	Name=TSS239
NC_003210.1	Wurtzel_et_al	TSS	1456686	1456686	.	-	.	Name=TSS240
NC_003210.1	Wurtzel_et_al	TSS	1460291	1460291	.	-	.	Name=TSS241
NC_003210.1	Wurtzel_et_al	TSS	1461291	1461291	.	-	.	Name=TSS242
NC_003210.1	Wurtzel_et_al	TSS	1461743	1461743	.	-	.	Name=TSS243
NC_003210.1	Wurtzel_et_al	TSS	1461813	1461813	.	+	.	Name=TSS244
NC_003210.1	Wurtzel_et_al	TSS	1464183	1464183	.	-	.	Name=TSS245
NC_003210.1	Wurtzel_et_al	TSS	1465564	1465564	.	-	.	Name=TSS246
NC_003210.1	Wurtzel_et_al	TSS	146799	146799	.	+	.	Name=TSS247
NC_003210.1	Wurtzel_et_al	TSS	1470560	1470560	.	-	.	Name=TSS248
NC_003210.1	Wurtzel_et_al	TSS	1472880	1472880	.	-	.	Name=TSS249
NC_003210.1	Wurtzel_et_al	TSS	1473701	1473701	.	-	.	Name=TSS250
NC_003210.1	Wurtzel_et_al	TSS	1474773	1474773	.	+	.	Name=TSS251
NC_003210.1	Wurtzel_et_al	TSS	1481183	1481183	.	-	.	Name=TSS252
NC_003210.1	Wurtzel_et_al	TSS	1482131	1482131	.	-	.	Name=TSS253
NC_003210.1	Wurtzel_et_al	TSS	1483430	1483430	.	-	.	Name=TSS254
NC_003210.1	Wurtzel_et_al	TSS	1487659	1487659	.	-	.	Name=TSS255
NC_003210.1	Wurtzel_et_al	TSS	1491082	1491082	.	-	.	Name=TSS256
NC_003210.1	Wurtzel_et_al	TSS	1491095	1491095	.	-	.	Name=TSS257
NC_003210.1	Wurtzel_et_al	TSS	1494284	1494284	.	-	.	Name=TSS258
NC_003210.1	Wurtzel_et_al	TSS	1495106	1495106	.	-	.	Name=TSS259
NC_003210.1	Wurtzel_et_al	TSS	1495191	1495191	.	+	.	Name=TSS260
NC_003210.1	Wurtzel_et_al	TSS	1495433	1495433	.	+	.	Name=TSS261
NC_003210.1	Wurtzel_et_al	TSS	1496257	1496257	.	-	.	Name=TSS262
NC_003210.1	Wurtzel_et_al	TSS	1496967	1496967	.	-	.	Name=TSS263
NC_003210.1	Wurtzel_et_al	TSS	1500290	1500290	.	-	.	Name=TSS264
NC_003210.1	Wurtzel_et_al	TSS	150037	150037	.	-	.	Name=TSS265
NC_003210.1	Wurtzel_et_al	TSS	1501263	1501263	.	-	.	Name=TSS266
NC_003210.1	Wurtzel_et_al	TSS	1502178	1502178	.	-	.	Name=TSS267
NC_003210.1	Wurtzel_et_al	TSS	1504034	1504034	.	-	.	Name=TSS268
NC_003210.1	Wurtzel_et_al	TSS	1505209	1505209	.	-	.	Name=TSS269
NC_003210.1	Wurtzel_et_al	TSS	1507181	1507181	.	-	.	Name=TSS270
NC_003210.1	Wurtzel_et_al	TSS	1507192	1507192	.	-	.	Name=TSS271
NC_003210.1	Wurtzel_et_al	TSS	1507198	1507198	.	-	.	Name=TSS272
NC_003210.1	Wurtzel_et_al	TSS	1507812	1507812	.	-	.	Name=TSS273
NC_003210.1	Wurtzel_et_al	TSS	1508886	1508886	.	-	.	Name=TSS274
NC_003210.1	Wurtzel_et_al	TSS	1510185	1510185	.	-	.	Name=TSS275
NC_003210.1	Wurtzel_et_al	TSS	1511325	1511325	.	+	.	Name=TSS276
NC_003210.1	Wurtzel_et_al	TSS	1513732	1513732	.	-	.	Name=TSS277
NC_003210.1	Wurtzel_et_al	TSS	1513843	1513843	.	+	.	Name=TSS278
NC_003210.1	Wurtzel_et_al	TSS	1515317	1515317	.	-	.	Name=TSS279
NC_003210.1	Wurtzel_et_al	TSS	1518198	1518198	.	-	.	Name=TSS280
NC_003210.1	Wurtzel_et_al	TSS	1518863	1518863	.	-	.	Name=TSS281
NC_003210.1	Wurtzel_et_al	TSS	152041	152041	.	+	.	Name=TSS282
NC_003210.1	Wurtzel_et_al	TSS	1520862	1520862	.	-	.	Name=TSS283
NC_003210.1	Wurtzel_et_al	TSS	1520882	1520882	.	-	.	Name=TSS284
NC_003210.1	Wurtzel_et_al	TSS	1524026	1524026	.	-	.	Name=TSS285
NC_003210.1	Wurtzel_et_al	TSS	1524125	1524125	.	+	.	Name=TSS286
NC_003210.1	Wurtzel_et_al	TSS	1527031	1527031	.	-	.	Name=TSS287
NC_003210.1	Wurtzel_et_al	TSS	1527409	1527409	.	-	.	Name=TSS288
NC_003210.1	Wurtzel_et_al	TSS	1527991	1527991	.	-	.	Name=TSS289
NC_003210.1	Wurtzel_et_al	TSS	1530553	1530553	.	-	.	Name=TSS290
NC_003210.1	Wurtzel_et_al	TSS	1532431	1532431	.	-	.	Name=TSS291
NC_003210.1	Wurtzel_et_al	TSS	1535250	1535250	.	-	.	Name=TSS292
NC_003210.1	Wurtzel_et_al	TSS	153586	153586	.	+	.	Name=TSS293
NC_003210.1	Wurtzel_et_al	TSS	1537795	1537795	.	+	.	Name=TSS294
NC_003210.1	Wurtzel_et_al	TSS	1543845	1543845	.	-	.	Name=TSS295
NC_003210.1	Wurtzel_et_al	TSS	1545078	1545078	.	-	.	Name=TSS296
NC_003210.1	Wurtzel_et_al	TSS	1546269	1546269	.	-	.	Name=TSS297
NC_003210.1	Wurtzel_et_al	TSS	1547909	1547909	.	-	.	Name=TSS298
NC_003210.1	Wurtzel_et_al	TSS	1547995	1547995	.	+	.	Name=TSS299
NC_003210.1	Wurtzel_et_al	TSS	1548651	1548651	.	+	.	Name=TSS300
NC_003210.1	Wurtzel_et_al	TSS	1552629	1552629	.	-	.	Name=TSS301
NC_003210.1	Wurtzel_et_al	TSS	1554209	1554209	.	-	.	Name=TSS302
NC_003210.1	Wurtzel_et_al	TSS	1554317	1554317	.	+	.	Name=TSS303
NC_003210.1	Wurtzel_et_al	TSS	1556177	1556177	.	-	.	Name=TSS304
NC_003210.1	Wurtzel_et_al	TSS	1558443	1558443	.	-	.	Name=TSS305
NC_003210.1	Wurtzel_et_al	TSS	155968	155968	.	+	.	Name=TSS306
NC_003210.1	Wurtzel_et_al	TSS	1561450	1561450	.	-	.	Name=TSS307
NC_003210.1	Wurtzel_et_al	TSS	156	156	.	+	.	Name=TSS308
NC_003210.1	Wurtzel_et_al	TSS	1561906	1561906	.	-	.	Name=TSS309
NC_003210.1	Wurtzel_et_al	TSS	1564298	1564298	.	-	.	Name=TSS310
NC_003210.1	Wurtzel_et_al	TSS	1564666	1564666	.	-	.	Name=TSS311
NC_003210.1	Wurtzel_et_al	TSS	1565129	1565129	.	-	.	Name=TSS312
NC_003210.1	Wurtzel_et_al	TSS	1565146	1565146	.	-	.	Name=TSS313
NC_003210.1	Wurtzel_et_al	TSS	1566303	1566303	.	-	.	Name=TSS314
NC_003210.1	Wurtzel_et_al	TSS	1569055	1569055	.	-	.	Name=TSS315
NC_003210.1	Wurtzel_et_al	TSS	1570102	1570102	.	-	.	Name=TSS316
NC_003210.1	Wurtzel_et_al	TSS	1570916	1570916	.	-	.	Name=TSS317
NC_003210.1	Wurtzel_et_al	TSS	1573227	1573227	.	-	.	Name=TSS318
NC_003210.1	Wurtzel_et_al	TSS	1574912	1574912	.	-	.	Name=TSS319
NC_003210.1	Wurtzel_et_al	TSS	1575917	1575917	.	-	.	Name=TSS320
NC_003210.1	Wurtzel_et_al	TSS	1577162	1577162	.	-	.	Name=TSS321
NC_003210.1	Wurtzel_et_al	TSS	1580137	1580137	.	-	.	Name=TSS322
NC_003210.1	Wurtzel_et_al	TSS	1582815	1582815	.	-	.	Name=TSS323
NC_003210.1	Wurtzel_et_al	TSS	1589138	1589138	.	-	.	Name=TSS324
NC_003210.1	Wurtzel_et_al	TSS	1594438	1594438	.	-	.	Name=TSS325
NC_003210.1	Wurtzel_et_al	TSS	1595148	1595148	.	-	.	Name=TSS326
NC_003210.1	Wurtzel_et_al	TSS	1597455	1597455	.	-	.	Name=TSS327
NC_003210.1	Wurtzel_et_al	TSS	1599815	1599815	.	-	.	Name=TSS328
NC_003210.1	Wurtzel_et_al	TSS	1599835	1599835	.	-	.	Name=TSS329
NC_003210.1	Wurtzel_et_al	TSS	1599842	1599842	.	-	.	Name=TSS330
NC_003210.1	Wurtzel_et_al	TSS	1600324	1600324	.	-	.	Name=TSS331
NC_003210.1	Wurtzel_et_al	TSS	16024	16024	.	+	.	Name=TSS332
NC_003210.1	Wurtzel_et_al	TSS	1604479	1604479	.	-	.	Name=TSS333
NC_003210.1	Wurtzel_et_al	TSS	1609957	1609957	.	-	.	Name=TSS334
NC_003210.1	Wurtzel_et_al	TSS	1611207	1611207	.	-	.	Name=TSS335
NC_003210.1	Wurtzel_et_al	TSS	1612429	1612429	.	-	.	Name=TSS336
NC_003210.1	Wurtzel_et_al	TSS	1612437	1612437	.	-	.	Name=TSS337
NC_003210.1	Wurtzel_et_al	TSS	1612443	1612443	.	-	.	Name=TSS338
NC_003210.1	Wurtzel_et_al	TSS	1612454	1612454	.	-	.	Name=TSS339
NC_003210.1	Wurtzel_et_al	TSS	1613300	1613300	.	-	.	Name=TSS340
NC_003210.1	Wurtzel_et_al	TSS	1616849	1616849	.	-	.	Name=TSS341
NC_003210.1	Wurtzel_et_al	TSS	1619243	1619243	.	-	.	Name=TSS342
NC_003210.1	Wurtzel_et_al	TSS	1619960	1619960	.	-	.	Name=TSS343
NC_003210.1	Wurtzel_et_al	TSS	1620064	1620064	.	+	.	Name=TSS344
NC_003210.1	Wurtzel_et_al	TSS	1622393	1622393	.	-	.	Name=TSS345
NC_003210.1	Wurtzel_et_al	TSS	1622547	1622547	.	+	.	Name=TSS346
NC_003210.1	Wurtzel_et_al	TSS	162292	162292	.	-	.	Name=TSS347
NC_003210.1	Wurtzel_et_al	TSS	162441	162441	.	+	.	Name=TSS348
NC_003210.1	Wurtzel_et_al	TSS	1625349	1625349	.	-	.	Name=TSS349
NC_003210.1	Wurtzel_et_al	TSS	1626031	1626031	.	-	.	Name=TSS350
NC_003210.1	Wurtzel_et_al	TSS	1627660	1627660	.	-	.	Name=TSS351
NC_003210.1	Wurtzel_et_al	TSS	1627777	1627777	.	+	.	Name=TSS352
NC_003210.1	Wurtzel_et_al	TSS	1633790	1633790	.	-	.	Name=TSS353
NC_003210.1	Wurtzel_et_al	TSS	1636313	1636313	.	-	.	Name=TSS354
NC_003210.1	Wurtzel_et_al	TSS	163664	163664	.	+	.	Name=TSS355
NC_003210.1	Wurtzel_et_al	TSS	1638259	1638259	.	-	.	Name=TSS356
NC_003210.1	Wurtzel_et_al	TSS	1638390	1638390	.	+	.	Name=TSS357
NC_003210.1	Wurtzel_et_al	TSS	1638942	1638942	.	+	.	Name=TSS358
NC_003210.1	Wurtzel_et_al	TSS	1641120	1641120	.	-	.	Name=TSS359
NC_003210.1	Wurtzel_et_al	TSS	1642826	1642826	.	-	.	Name=TSS360
NC_003210.1	Wurtzel_et_al	TSS	1643942	1643942	.	-	.	Name=TSS361
NC_003210.1	Wurtzel_et_al	TSS	1645227	1645227	.	-	.	Name=TSS362
NC_003210.1	Wurtzel_et_al	TSS	1646515	1646515	.	-	.	Name=TSS363
NC_003210.1	Wurtzel_et_al	TSS	1646622	1646622	.	+	.	Name=TSS364
NC_003210.1	Wurtzel_et_al	TSS	1648407	1648407	.	-	.	Name=TSS365
NC_003210.1	Wurtzel_et_al	TSS	1650023	1650023	.	-	.	Name=TSS366
NC_003210.1	Wurtzel_et_al	TSS	1652527	1652527	.	-	.	Name=TSS367
NC_003210.1	Wurtzel_et_al	TSS	1653457	1653457	.	-	.	Name=TSS368
NC_003210.1	Wurtzel_et_al	TSS	1653469	1653469	.	-	.	Name=TSS369
NC_003210.1	Wurtzel_et_al	TSS	1654607	1654607	.	-	.	Name=TSS370
NC_003210.1	Wurtzel_et_al	TSS	1654910	1654910	.	-	.	Name=TSS371
NC_003210.1	Wurtzel_et_al	TSS	1656003	1656003	.	-	.	Name=TSS372
NC_003210.1	Wurtzel_et_al	TSS	1656112	1656112	.	+	.	Name=TSS373
NC_003210.1	Wurtzel_et_al	TSS	1656843	1656843	.	-	.	Name=TSS374
NC_003210.1	Wurtzel_et_al	TSS	1658491	1658491	.	-	.	Name=TSS375
NC_003210.1	Wurtzel_et_al	TSS	1658499	1658499	.	-	.	Name=TSS376
NC_003210.1	Wurtzel_et_al	TSS	1659325	1659325	.	-	.	Name=TSS377
NC_003210.1	Wurtzel_et_al	TSS	1662555	1662555	.	-	.	Name=TSS378
NC_003210.1	Wurtzel_et_al	TSS	1664010	1664010	.	-	.	Name=TSS379
NC_003210.1	Wurtzel_et_al	TSS	1664514	1664514	.	-	.	Name=TSS380
NC_003210.1	Wurtzel_et_al	TSS	1667753	1667753	.	-	.	Name=TSS381
NC_003210.1	Wurtzel_et_al	TSS	1669464	1669464	.	-	.	Name=TSS382
NC_003210.1	Wurtzel_et_al	TSS	166995	166995	.	-	.	Name=TSS383
NC_003210.1	Wurtzel_et_al	TSS	1669993	1669993	.	-	.	Name=TSS384
NC_003210.1	Wurtzel_et_al	TSS	167060	167060	.	+	.	Name=TSS385
NC_003210.1	Wurtzel_et_al	TSS	1672695	1672695	.	-	.	Name=TSS386
NC_003210.1	Wurtzel_et_al	TSS	1676916	1676916	.	-	.	Name=TSS387
NC_003210.1	Wurtzel_et_al	TSS	1677286	1677286	.	+	.	Name=TSS388
NC_003210.1	Wurtzel_et_al	TSS	1680115	1680115	.	+	.	Name=TSS389
NC_003210.1	Wurtzel_et_al	TSS	1680618	1680618	.	+	.	Name=TSS390
NC_003210.1	Wurtzel_et_al	TSS	1684479	1684479	.	-	.	Name=TSS391
NC_003210.1	Wurtzel_et_al	TSS	1687305	1687305	.	-	.	Name=TSS392
NC_003210.1	Wurtzel_et_al	TSS	1688671	1688671	.	-	.	Name=TSS393
NC_003210.1	Wurtzel_et_al	TSS	1688703	1688703	.	-	.	Name=TSS394
NC_003210.1	Wurtzel_et_al	TSS	1689165	1689165	.	-	.	Name=TSS395
NC_003210.1	Wurtzel_et_al	TSS	1691923	1691923	.	-	.	Name=TSS396
NC_003210.1	Wurtzel_et_al	TSS	169473	169473	.	+	.	Name=TSS397
NC_003210.1	Wurtzel_et_al	TSS	1696219	1696219	.	-	.	Name=TSS398
NC_003210.1	Wurtzel_et_al	TSS	1696241	1696241	.	+	.	Name=TSS399
NC_003210.1	Wurtzel_et_al	TSS	1697318	1697318	.	-	.	Name=TSS400
NC_003210.1	Wurtzel_et_al	TSS	1698102	1698102	.	-	.	Name=TSS401
NC_003210.1	Wurtzel_et_al	TSS	1704003	1704003	.	-	.	Name=TSS402
NC_003210.1	Wurtzel_et_al	TSS	1704657	1704657	.	-	.	Name=TSS403
NC_003210.1	Wurtzel_et_al	TSS	1705662	1705662	.	-	.	Name=TSS404
NC_003210.1	Wurtzel_et_al	TSS	1706257	1706257	.	-	.	Name=TSS405
NC_003210.1	Wurtzel_et_al	TSS	1708050	1708050	.	-	.	Name=TSS406
NC_003210.1	Wurtzel_et_al	TSS	1711555	1711555	.	-	.	Name=TSS407
NC_003210.1	Wurtzel_et_al	TSS	1715146	1715146	.	-	.	Name=TSS408
NC_003210.1	Wurtzel_et_al	TSS	1715630	1715630	.	-	.	Name=TSS409
NC_003210.1	Wurtzel_et_al	TSS	1716665	1716665	.	-	.	Name=TSS410
NC_003210.1	Wurtzel_et_al	TSS	1716818	1716818	.	+	.	Name=TSS411
NC_003210.1	Wurtzel_et_al	TSS	172186	172186	.	-	.	Name=TSS412
NC_003210.1	Wurtzel_et_al	TSS	1722390	1722390	.	-	.	Name=TSS413
NC_003210.1	Wurtzel_et_al	TSS	1723380	1723380	.	-	.	Name=TSS414
NC_003210.1	Wurtzel_et_al	TSS	1723387	1723387	.	-	.	Name=TSS415
NC_003210.1	Wurtzel_et_al	TSS	1723616	1723616	.	-	.	Name=TSS416
NC_003210.1	Wurtzel_et_al	TSS	1724202	1724202	.	+	.	Name=TSS417
NC_003210.1	Wurtzel_et_al	TSS	1724454	1724454	.	+	.	Name=TSS418
NC_003210.1	Wurtzel_et_al	TSS	1727827	1727827	.	-	.	Name=TSS419
NC_003210.1	Wurtzel_et_al	TSS	1731806	1731806	.	-	.	Name=TSS420
NC_003210.1	Wurtzel_et_al	TSS	1731914	1731914	.	+	.	Name=TSS421
NC_003210.1	Wurtzel_et_al	TSS	1732471	1732471	.	+	.	Name=TSS422
NC_003210.1	Wurtzel_et_al	TSS	1739634	1739634	.	-	.	Name=TSS423
NC_003210.1	Wurtzel_et_al	TSS	1741022	1741022	.	-	.	Name=TSS424
NC_003210.1	Wurtzel_et_al	TSS	1741083	1741083	.	-	.	Name=TSS425
NC_003210.1	Wurtzel_et_al	TSS	1741231	1741231	.	-	.	Name=TSS426
NC_003210.1	Wurtzel_et_al	TSS	1741271	1741271	.	-	.	Name=TSS427
NC_003210.1	Wurtzel_et_al	TSS	1741463	1741463	.	-	.	Name=TSS428
NC_003210.1	Wurtzel_et_al	TSS	1741729	1741729	.	-	.	Name=TSS429
NC_003210.1	Wurtzel_et_al	TSS	1741853	1741853	.	-	.	Name=TSS430
NC_003210.1	Wurtzel_et_al	TSS	1741910	1741910	.	-	.	Name=TSS431
NC_003210.1	Wurtzel_et_al	TSS	1741998	1741998	.	-	.	Name=TSS432
NC_003210.1	Wurtzel_et_al	TSS	1742150	1742150	.	-	.	Name=TSS433
NC_003210.1	Wurtzel_et_al	TSS	1742466	1742466	.	-	.	Name=TSS434
NC_003210.1	Wurtzel_et_al	TSS	1742476	1742476	.	-	.	Name=TSS435
NC_003210.1	Wurtzel_et_al	TSS	174793	174793	.	+	.	Name=TSS436
NC_003210.1	Wurtzel_et_al	TSS	1748059	1748059	.	-	.	Name=TSS437
NC_003210.1	Wurtzel_et_al	TSS	1748734	1748734	.	-	.	Name=TSS438
NC_003210.1	Wurtzel_et_al	TSS	1749762	1749762	.	-	.	Name=TSS439
NC_003210.1	Wurtzel_et_al	TSS	1749850	1749850	.	+	.	Name=TSS440
NC_003210.1	Wurtzel_et_al	TSS	1751221	1751221	.	+	.	Name=TSS441
NC_003210.1	Wurtzel_et_al	TSS	1752975	1752975	.	-	.	Name=TSS442
NC_003210.1	Wurtzel_et_al	TSS	1753878	1753878	.	-	.	Name=TSS443
NC_003210.1	Wurtzel_et_al	TSS	1755008	1755008	.	+	.	Name=TSS444
NC_003210.1	Wurtzel_et_al	TSS	1755039	1755039	.	-	.	Name=TSS445
NC_003210.1	Wurtzel_et_al	TSS	1756906	1756906	.	-	.	Name=TSS446
NC_003210.1	Wurtzel_et_al	TSS	175736	175736	.	+	.	Name=TSS447
NC_003210.1	Wurtzel_et_al	TSS	1757689	1757689	.	-	.	Name=TSS448
NC_003210.1	Wurtzel_et_al	TSS	1757748	1757748	.	+	.	Name=TSS449
NC_003210.1	Wurtzel_et_al	TSS	1762052	1762052	.	-	.	Name=TSS450
NC_003210.1	Wurtzel_et_al	TSS	1762176	1762176	.	+	.	Name=TSS451
NC_003210.1	Wurtzel_et_al	TSS	1763772	1763772	.	-	.	Name=TSS452
NC_003210.1	Wurtzel_et_al	TSS	1763895	1763895	.	+	.	Name=TSS453
NC_003210.1	Wurtzel_et_al	TSS	1767319	1767319	.	-	.	Name=TSS454
NC_003210.1	Wurtzel_et_al	TSS	1767814	1767814	.	+	.	Name=TSS455
NC_003210.1	Wurtzel_et_al	TSS	1769456	1769456	.	+	.	Name=TSS456
NC_003210.1	Wurtzel_et_al	TSS	1769524	1769524	.	-	.	Name=TSS457
NC_003210.1	Wurtzel_et_al	TSS	1770069	1770069	.	-	.	Name=TSS458
NC_003210.1	Wurtzel_et_al	TSS	1771434	1771434	.	-	.	Name=TSS459
NC_003210.1	Wurtzel_et_al	TSS	1771523	1771523	.	+	.	Name=TSS460
NC_003210.1	Wurtzel_et_al	TSS	1772149	1772149	.	+	.	Name=TSS461
NC_003210.1	Wurtzel_et_al	TSS	1774942	1774942	.	+	.	Name=TSS462
NC_003210.1	Wurtzel_et_al	TSS	1776877	1776877	.	-	.	Name=TSS463
NC_003210.1	Wurtzel_et_al	TSS	1777729	1777729	.	+	.	Name=TSS464
NC_003210.1	Wurtzel_et_al	TSS	1778256	1778256	.	+	.	Name=TSS465
NC_003210.1	Wurtzel_et_al	TSS	177865	177865	.	+	.	Name=TSS466
NC_003210.1	Wurtzel_et_al	TSS	1779542	1779542	.	-	.	Name=TSS467
NC_003210.1	Wurtzel_et_al	TSS	1781139	1781139	.	-	.	Name=TSS468
NC_003210.1	Wurtzel_et_al	TSS	1781535	1781535	.	-	.	Name=TSS469
NC_003210.1	Wurtzel_et_al	TSS	1781898	1781898	.	-	.	Name=TSS470
NC_003210.1	Wurtzel_et_al	TSS	1784366	1784366	.	-	.	Name=TSS471
NC_003210.1	Wurtzel_et_al	TSS	1785822	1785822	.	-	.	Name=TSS472
NC_003210.1	Wurtzel_et_al	TSS	1788776	1788776	.	-	.	Name=TSS473
NC_003210.1	Wurtzel_et_al	TSS	1789802	1789802	.	-	.	Name=TSS474
NC_003210.1	Wurtzel_et_al	TSS	1800500	1800500	.	-	.	Name=TSS475
NC_003210.1	Wurtzel_et_al	TSS	1806450	1806450	.	-	.	Name=TSS476
NC_003210.1	Wurtzel_et_al	TSS	1806459	1806459	.	-	.	Name=TSS477
NC_003210.1	Wurtzel_et_al	TSS	1807601	1807601	.	-	.	Name=TSS478
NC_003210.1	Wurtzel_et_al	TSS	1810065	1810065	.	-	.	Name=TSS479
NC_003210.1	Wurtzel_et_al	TSS	1815107	1815107	.	-	.	Name=TSS480
NC_003210.1	Wurtzel_et_al	TSS	1817904	1817904	.	-	.	Name=TSS481
NC_003210.1	Wurtzel_et_al	TSS	1818544	1818544	.	-	.	Name=TSS482
NC_003210.1	Wurtzel_et_al	TSS	1818663	1818663	.	+	.	Name=TSS483
NC_003210.1	Wurtzel_et_al	TSS	1819829	1819829	.	-	.	Name=TSS484
NC_003210.1	Wurtzel_et_al	TSS	1820461	1820461	.	-	.	Name=TSS485
NC_003210.1	Wurtzel_et_al	TSS	1822299	1822299	.	-	.	Name=TSS486
NC_003210.1	Wurtzel_et_al	TSS	1823418	1823418	.	-	.	Name=TSS487
NC_003210.1	Wurtzel_et_al	TSS	1826783	1826783	.	-	.	Name=TSS488
NC_003210.1	Wurtzel_et_al	TSS	1829984	1829984	.	-	.	Name=TSS489
NC_003210.1	Wurtzel_et_al	TSS	1832212	1832212	.	-	.	Name=TSS490
NC_003210.1	Wurtzel_et_al	TSS	1832947	1832947	.	-	.	Name=TSS491
NC_003210.1	Wurtzel_et_al	TSS	1835124	1835124	.	-	.	Name=TSS492
NC_003210.1	Wurtzel_et_al	TSS	1835310	1835310	.	-	.	Name=TSS493
NC_003210.1	Wurtzel_et_al	TSS	1842976	1842976	.	-	.	Name=TSS494
NC_003210.1	Wurtzel_et_al	TSS	1844	1844	.	+	.	Name=TSS495
NC_003210.1	Wurtzel_et_al	TSS	1847508	1847508	.	-	.	Name=TSS496
NC_003210.1	Wurtzel_et_al	TSS	1847994	1847994	.	-	.	Name=TSS497
NC_003210.1	Wurtzel_et_al	TSS	1848732	1848732	.	-	.	Name=TSS498
NC_003210.1	Wurtzel_et_al	TSS	1853947	1853947	.	-	.	Name=TSS499
NC_003210.1	Wurtzel_et_al	TSS	1854469	1854469	.	-	.	Name=TSS500
NC_003210.1	Wurtzel_et_al	TSS	1855538	1855538	.	+	.	Name=TSS501
NC_003210.1	Wurtzel_et_al	TSS	1857209	1857209	.	-	.	Name=TSS502
NC_003210.1	Wurtzel_et_al	TSS	1857793	1857793	.	-	.	Name=TSS503
NC_003210.1	Wurtzel_et_al	TSS	1857833	1857833	.	+	.	Name=TSS504
NC_003210.1	Wurtzel_et_al	TSS	1859039	1859039	.	-	.	Name=TSS505
NC_003210.1	Wurtzel_et_al	TSS	1859056	1859056	.	-	.	Name=TSS506
NC_003210.1	Wurtzel_et_al	TSS	1859806	1859806	.	-	.	Name=TSS507
NC_003210.1	Wurtzel_et_al	TSS	1861190	1861190	.	-	.	Name=TSS508
NC_003210.1	Wurtzel_et_al	TSS	1862335	1862335	.	-	.	Name=TSS509
NC_003210.1	Wurtzel_et_al	TSS	1862439	1862439	.	+	.	Name=TSS510
NC_003210.1	Wurtzel_et_al	TSS	1866331	1866331	.	-	.	Name=TSS511
NC_003210.1	Wurtzel_et_al	TSS	1867087	1867087	.	-	.	Name=TSS512
NC_003210.1	Wurtzel_et_al	TSS	1867440	1867440	.	-	.	Name=TSS513
NC_003210.1	Wurtzel_et_al	TSS	1867730	1867730	.	-	.	Name=TSS514
NC_003210.1	Wurtzel_et_al	TSS	1872445	1872445	.	-	.	Name=TSS515
NC_003210.1	Wurtzel_et_al	TSS	1873646	1873646	.	-	.	Name=TSS516
NC_003210.1	Wurtzel_et_al	TSS	1875478	1875478	.	-	.	Name=TSS517
NC_003210.1	Wurtzel_et_al	TSS	1880883	1880883	.	-	.	Name=TSS518
NC_003210.1	Wurtzel_et_al	TSS	1881292	1881292	.	-	.	Name=TSS519
NC_003210.1	Wurtzel_et_al	TSS	1884099	1884099	.	-	.	Name=TSS520
NC_003210.1	Wurtzel_et_al	TSS	1884784	1884784	.	-	.	Name=TSS521
NC_003210.1	Wurtzel_et_al	TSS	1886912	1886912	.	-	.	Name=TSS522
NC_003210.1	Wurtzel_et_al	TSS	1887801	1887801	.	-	.	Name=TSS523
NC_003210.1	Wurtzel_et_al	TSS	1890729	1890729	.	-	.	Name=TSS524
NC_003210.1	Wurtzel_et_al	TSS	1890880	1890880	.	+	.	Name=TSS525
NC_003210.1	Wurtzel_et_al	TSS	1890969	1890969	.	+	.	Name=TSS526
NC_003210.1	Wurtzel_et_al	TSS	1893500	1893500	.	-	.	Name=TSS527
NC_003210.1	Wurtzel_et_al	TSS	189598	189598	.	+	.	Name=TSS528
NC_003210.1	Wurtzel_et_al	TSS	1898559	1898559	.	-	.	Name=TSS529
NC_003210.1	Wurtzel_et_al	TSS	1902162	1902162	.	-	.	Name=TSS530
NC_003210.1	Wurtzel_et_al	TSS	1903281	1903281	.	-	.	Name=TSS531
NC_003210.1	Wurtzel_et_al	TSS	1904056	1904056	.	-	.	Name=TSS532
NC_003210.1	Wurtzel_et_al	TSS	1904124	1904124	.	+	.	Name=TSS533
NC_003210.1	Wurtzel_et_al	TSS	1905918	1905918	.	+	.	Name=TSS534
NC_003210.1	Wurtzel_et_al	TSS	1906099	1906099	.	+	.	Name=TSS535
NC_003210.1	Wurtzel_et_al	TSS	190668	190668	.	+	.	Name=TSS536
NC_003210.1	Wurtzel_et_al	TSS	1912864	1912864	.	-	.	Name=TSS537
NC_003210.1	Wurtzel_et_al	TSS	1917518	1917518	.	-	.	Name=TSS538
NC_003210.1	Wurtzel_et_al	TSS	1918261	1918261	.	-	.	Name=TSS539
NC_003210.1	Wurtzel_et_al	TSS	1918339	1918339	.	+	.	Name=TSS540
NC_003210.1	Wurtzel_et_al	TSS	191988	191988	.	+	.	Name=TSS541
NC_003210.1	Wurtzel_et_al	TSS	1920977	1920977	.	-	.	Name=TSS542
NC_003210.1	Wurtzel_et_al	TSS	1922326	1922326	.	-	.	Name=TSS543
NC_003210.1	Wurtzel_et_al	TSS	1922416	1922416	.	+	.	Name=TSS544
NC_003210.1	Wurtzel_et_al	TSS	1923362	1923362	.	+	.	Name=TSS545
NC_003210.1	Wurtzel_et_al	TSS	1926390	1926390	.	-	.	Name=TSS546
NC_003210.1	Wurtzel_et_al	TSS	1928481	1928481	.	-	.	Name=TSS547
NC_003210.1	Wurtzel_et_al	TSS	1928816	1928816	.	-	.	Name=TSS548
NC_003210.1	Wurtzel_et_al	TSS	1931342	1931342	.	-	.	Name=TSS549
NC_003210.1	Wurtzel_et_al	TSS	1932302	1932302	.	-	.	Name=TSS550
NC_003210.1	Wurtzel_et_al	TSS	1933025	1933025	.	-	.	Name=TSS551
NC_003210.1	Wurtzel_et_al	TSS	1933042	1933042	.	-	.	Name=TSS552
NC_003210.1	Wurtzel_et_al	TSS	1933067	1933067	.	-	.	Name=TSS553
NC_003210.1	Wurtzel_et_al	TSS	1933296	1933296	.	-	.	Name=TSS554
NC_003210.1	Wurtzel_et_al	TSS	1933586	1933586	.	-	.	Name=TSS555
NC_003210.1	Wurtzel_et_al	TSS	193576	193576	.	+	.	Name=TSS556
NC_003210.1	Wurtzel_et_al	TSS	1937630	1937630	.	-	.	Name=TSS557
NC_003210.1	Wurtzel_et_al	TSS	1937743	1937743	.	+	.	Name=TSS558
NC_003210.1	Wurtzel_et_al	TSS	193960	193960	.	+	.	Name=TSS559
NC_003210.1	Wurtzel_et_al	TSS	1943113	1943113	.	-	.	Name=TSS560
NC_003210.1	Wurtzel_et_al	TSS	1944074	1944074	.	-	.	Name=TSS561
NC_003210.1	Wurtzel_et_al	TSS	1946446	1946446	.	-	.	Name=TSS562
NC_003210.1	Wurtzel_et_al	TSS	1947510	1947510	.	-	.	Name=TSS563
NC_003210.1	Wurtzel_et_al	TSS	1950789	1950789	.	-	.	Name=TSS564
NC_003210.1	Wurtzel_et_al	TSS	1951331	1951331	.	-	.	Name=TSS565
NC_003210.1	Wurtzel_et_al	TSS	1952580	1952580	.	-	.	Name=TSS566
NC_003210.1	Wurtzel_et_al	TSS	1953179	1953179	.	-	.	Name=TSS567
NC_003210.1	Wurtzel_et_al	TSS	1953389	1953389	.	+	.	Name=TSS568
NC_003210.1	Wurtzel_et_al	TSS	1953805	1953805	.	+	.	Name=TSS569
NC_003210.1	Wurtzel_et_al	TSS	1955153	1955153	.	-	.	Name=TSS570
NC_003210.1	Wurtzel_et_al	TSS	1955507	1955507	.	-	.	Name=TSS571
NC_003210.1	Wurtzel_et_al	TSS	1956705	1956705	.	-	.	Name=TSS572
NC_003210.1	Wurtzel_et_al	TSS	195727	195727	.	+	.	Name=TSS573
NC_003210.1	Wurtzel_et_al	TSS	1958913	1958913	.	-	.	Name=TSS574
NC_003210.1	Wurtzel_et_al	TSS	1960504	1960504	.	-	.	Name=TSS575
NC_003210.1	Wurtzel_et_al	TSS	1962619	1962619	.	-	.	Name=TSS576
NC_003210.1	Wurtzel_et_al	TSS	1963635	1963635	.	-	.	Name=TSS577
NC_003210.1	Wurtzel_et_al	TSS	1963808	1963808	.	+	.	Name=TSS578
NC_003210.1	Wurtzel_et_al	TSS	196729	196729	.	+	.	Name=TSS579
NC_003210.1	Wurtzel_et_al	TSS	1968902	1968902	.	-	.	Name=TSS580
NC_003210.1	Wurtzel_et_al	TSS	1971553	1971553	.	-	.	Name=TSS581
NC_003210.1	Wurtzel_et_al	TSS	1972123	1972123	.	-	.	Name=TSS582
NC_003210.1	Wurtzel_et_al	TSS	1974992	1974992	.	-	.	Name=TSS583
NC_003210.1	Wurtzel_et_al	TSS	1977795	1977795	.	-	.	Name=TSS584
NC_003210.1	Wurtzel_et_al	TSS	1981054	1981054	.	-	.	Name=TSS585
NC_003210.1	Wurtzel_et_al	TSS	1981691	1981691	.	-	.	Name=TSS586
NC_003210.1	Wurtzel_et_al	TSS	1982299	1982299	.	+	.	Name=TSS587
NC_003210.1	Wurtzel_et_al	TSS	1983773	1983773	.	-	.	Name=TSS588
NC_003210.1	Wurtzel_et_al	TSS	1984828	1984828	.	+	.	Name=TSS589
NC_003210.1	Wurtzel_et_al	TSS	1987259	1987259	.	+	.	Name=TSS590
NC_003210.1	Wurtzel_et_al	TSS	1987345	1987345	.	+	.	Name=TSS591
NC_003210.1	Wurtzel_et_al	TSS	1988137	1988137	.	+	.	Name=TSS592
NC_003210.1	Wurtzel_et_al	TSS	1990978	1990978	.	+	.	Name=TSS593
NC_003210.1	Wurtzel_et_al	TSS	1994660	1994660	.	-	.	Name=TSS594
NC_003210.1	Wurtzel_et_al	TSS	1995477	1995477	.	-	.	Name=TSS595
NC_003210.1	Wurtzel_et_al	TSS	1996780	1996780	.	-	.	Name=TSS596
NC_003210.1	Wurtzel_et_al	TSS	1998065	1998065	.	-	.	Name=TSS597
NC_003210.1	Wurtzel_et_al	TSS	199957	199957	.	+	.	Name=TSS598
NC_003210.1	Wurtzel_et_al	TSS	2000601	2000601	.	-	.	Name=TSS599
NC_003210.1	Wurtzel_et_al	TSS	2002076	2002076	.	-	.	Name=TSS600
NC_003210.1	Wurtzel_et_al	TSS	2002084	2002084	.	-	.	Name=TSS601
NC_003210.1	Wurtzel_et_al	TSS	200410	200410	.	+	.	Name=TSS602
NC_003210.1	Wurtzel_et_al	TSS	2004381	2004381	.	-	.	Name=TSS603
NC_003210.1	Wurtzel_et_al	TSS	2004982	2004982	.	-	.	Name=TSS604
NC_003210.1	Wurtzel_et_al	TSS	2007488	2007488	.	-	.	Name=TSS605
NC_003210.1	Wurtzel_et_al	TSS	2008117	2008117	.	-	.	Name=TSS606
NC_003210.1	Wurtzel_et_al	TSS	2008616	2008616	.	-	.	Name=TSS607
NC_003210.1	Wurtzel_et_al	TSS	2010019	2010019	.	-	.	Name=TSS608
NC_003210.1	Wurtzel_et_al	TSS	201185	201185	.	+	.	Name=TSS609
NC_003210.1	Wurtzel_et_al	TSS	2012478	2012478	.	-	.	Name=TSS610
NC_003210.1	Wurtzel_et_al	TSS	2013928	2013928	.	-	.	Name=TSS611
NC_003210.1	Wurtzel_et_al	TSS	2016635	2016635	.	-	.	Name=TSS612
NC_003210.1	Wurtzel_et_al	TSS	2018748	2018748	.	-	.	Name=TSS613
NC_003210.1	Wurtzel_et_al	TSS	2019289	2019289	.	-	.	Name=TSS614
NC_003210.1	Wurtzel_et_al	TSS	2019371	2019371	.	+	.	Name=TSS615
NC_003210.1	Wurtzel_et_al	TSS	2023928	2023928	.	-	.	Name=TSS616
NC_003210.1	Wurtzel_et_al	TSS	2027505	2027505	.	-	.	Name=TSS617
NC_003210.1	Wurtzel_et_al	TSS	2030606	2030606	.	-	.	Name=TSS618
NC_003210.1	Wurtzel_et_al	TSS	2031263	2031263	.	-	.	Name=TSS619
NC_003210.1	Wurtzel_et_al	TSS	2033547	2033547	.	-	.	Name=TSS620
NC_003210.1	Wurtzel_et_al	TSS	2034558	2034558	.	-	.	Name=TSS621
NC_003210.1	Wurtzel_et_al	TSS	2036950	2036950	.	-	.	Name=TSS622
NC_003210.1	Wurtzel_et_al	TSS	2038875	2038875	.	-	.	Name=TSS623
NC_003210.1	Wurtzel_et_al	TSS	2040024	2040024	.	-	.	Name=TSS624
NC_003210.1	Wurtzel_et_al	TSS	204467	204467	.	-	.	Name=TSS625
NC_003210.1	Wurtzel_et_al	TSS	2048547	2048547	.	-	.	Name=TSS626
NC_003210.1	Wurtzel_et_al	TSS	2050364	2050364	.	-	.	Name=TSS627
NC_003210.1	Wurtzel_et_al	TSS	2050510	2050510	.	+	.	Name=TSS628
NC_003210.1	Wurtzel_et_al	TSS	2052203	2052203	.	+	.	Name=TSS629
NC_003210.1	Wurtzel_et_al	TSS	2052744	2052744	.	+	.	Name=TSS630
NC_003210.1	Wurtzel_et_al	TSS	2052941	2052941	.	-	.	Name=TSS631
NC_003210.1	Wurtzel_et_al	TSS	2053832	2053832	.	-	.	Name=TSS632
NC_003210.1	Wurtzel_et_al	TSS	205604	205604	.	-	.	Name=TSS633
NC_003210.1	Wurtzel_et_al	TSS	205686	205686	.	+	.	Name=TSS634
NC_003210.1	Wurtzel_et_al	TSS	206018	206018	.	+	.	Name=TSS635
NC_003210.1	Wurtzel_et_al	TSS	2065633	2065633	.	+	.	Name=TSS636
NC_003210.1	Wurtzel_et_al	TSS	2067864	2067864	.	-	.	Name=TSS637
NC_003210.1	Wurtzel_et_al	TSS	2068926	2068926	.	-	.	Name=TSS638
NC_003210.1	Wurtzel_et_al	TSS	2069675	2069675	.	-	.	Name=TSS639
NC_003210.1	Wurtzel_et_al	TSS	2070682	2070682	.	-	.	Name=TSS640
NC_003210.1	Wurtzel_et_al	TSS	2074903	2074903	.	-	.	Name=TSS641
NC_003210.1	Wurtzel_et_al	TSS	207589	207589	.	+	.	Name=TSS642
NC_003210.1	Wurtzel_et_al	TSS	2076920	2076920	.	-	.	Name=TSS643
NC_003210.1	Wurtzel_et_al	TSS	2078043	2078043	.	-	.	Name=TSS644
NC_003210.1	Wurtzel_et_al	TSS	2079840	2079840	.	-	.	Name=TSS645
NC_003210.1	Wurtzel_et_al	TSS	209321	209321	.	+	.	Name=TSS646
NC_003210.1	Wurtzel_et_al	TSS	2095179	2095179	.	-	.	Name=TSS647
NC_003210.1	Wurtzel_et_al	TSS	2095730	2095730	.	-	.	Name=TSS648
NC_003210.1	Wurtzel_et_al	TSS	2097094	2097094	.	-	.	Name=TSS649
NC_003210.1	Wurtzel_et_al	TSS	2100218	2100218	.	-	.	Name=TSS650
NC_003210.1	Wurtzel_et_al	TSS	2100789	2100789	.	-	.	Name=TSS651
NC_003210.1	Wurtzel_et_al	TSS	2101724	2101724	.	-	.	Name=TSS652
NC_003210.1	Wurtzel_et_al	TSS	2110820	2110820	.	-	.	Name=TSS653
NC_003210.1	Wurtzel_et_al	TSS	2111682	2111682	.	-	.	Name=TSS654
NC_003210.1	Wurtzel_et_al	TSS	2113702	2113702	.	-	.	Name=TSS655
NC_003210.1	Wurtzel_et_al	TSS	2115095	2115095	.	-	.	Name=TSS656
NC_003210.1	Wurtzel_et_al	TSS	2117347	2117347	.	-	.	Name=TSS657
NC_003210.1	Wurtzel_et_al	TSS	2119822	2119822	.	-	.	Name=TSS658
NC_003210.1	Wurtzel_et_al	TSS	2121367	2121367	.	-	.	Name=TSS659
NC_003210.1	Wurtzel_et_al	TSS	2123787	2123787	.	-	.	Name=TSS660
NC_003210.1	Wurtzel_et_al	TSS	2125516	2125516	.	-	.	Name=TSS661
NC_003210.1	Wurtzel_et_al	TSS	2126979	2126979	.	-	.	Name=TSS662
NC_003210.1	Wurtzel_et_al	TSS	2129647	2129647	.	-	.	Name=TSS663
NC_003210.1	Wurtzel_et_al	TSS	2130103	2130103	.	-	.	Name=TSS664
NC_003210.1	Wurtzel_et_al	TSS	2130422	2130422	.	-	.	Name=TSS665
NC_003210.1	Wurtzel_et_al	TSS	2131050	2131050	.	-	.	Name=TSS666
NC_003210.1	Wurtzel_et_al	TSS	2131140	2131140	.	+	.	Name=TSS667
NC_003210.1	Wurtzel_et_al	TSS	2132385	2132385	.	+	.	Name=TSS668
NC_003210.1	Wurtzel_et_al	TSS	2136824	2136824	.	-	.	Name=TSS669
NC_003210.1	Wurtzel_et_al	TSS	213694	213694	.	-	.	Name=TSS670
NC_003210.1	Wurtzel_et_al	TSS	2137678	2137678	.	-	.	Name=TSS671
NC_003210.1	Wurtzel_et_al	TSS	2138795	2138795	.	-	.	Name=TSS672
NC_003210.1	Wurtzel_et_al	TSS	2139794	2139794	.	-	.	Name=TSS673
NC_003210.1	Wurtzel_et_al	TSS	2139870	2139870	.	-	.	Name=TSS674
NC_003210.1	Wurtzel_et_al	TSS	2139966	2139966	.	+	.	Name=TSS675
NC_003210.1	Wurtzel_et_al	TSS	2141042	2141042	.	+	.	Name=TSS676
NC_003210.1	Wurtzel_et_al	TSS	214429	214429	.	-	.	Name=TSS677
NC_003210.1	Wurtzel_et_al	TSS	2145127	2145127	.	+	.	Name=TSS678
NC_003210.1	Wurtzel_et_al	TSS	2146068	2146068	.	-	.	Name=TSS679
NC_003210.1	Wurtzel_et_al	TSS	2147457	2147457	.	-	.	Name=TSS680
NC_003210.1	Wurtzel_et_al	TSS	2149338	2149338	.	-	.	Name=TSS681
NC_003210.1	Wurtzel_et_al	TSS	2149357	2149357	.	-	.	Name=TSS682
NC_003210.1	Wurtzel_et_al	TSS	2149700	2149700	.	-	.	Name=TSS683
NC_003210.1	Wurtzel_et_al	TSS	2151510	2151510	.	-	.	Name=TSS684
NC_003210.1	Wurtzel_et_al	TSS	2151721	2151721	.	+	.	Name=TSS685
NC_003210.1	Wurtzel_et_al	TSS	215458	215458	.	-	.	Name=TSS686
NC_003210.1	Wurtzel_et_al	TSS	2155258	2155258	.	-	.	Name=TSS687
NC_003210.1	Wurtzel_et_al	TSS	2156741	2156741	.	-	.	Name=TSS688
NC_003210.1	Wurtzel_et_al	TSS	215689	215689	.	+	.	Name=TSS689
NC_003210.1	Wurtzel_et_al	TSS	2157868	2157868	.	-	.	Name=TSS690
NC_003210.1	Wurtzel_et_al	TSS	215803	215803	.	+	.	Name=TSS691
NC_003210.1	Wurtzel_et_al	TSS	2159114	2159114	.	-	.	Name=TSS692
NC_003210.1	Wurtzel_et_al	TSS	2159635	2159635	.	-	.	Name=TSS693
NC_003210.1	Wurtzel_et_al	TSS	2160505	2160505	.	-	.	Name=TSS694
NC_003210.1	Wurtzel_et_al	TSS	2161355	2161355	.	-	.	Name=TSS695
NC_003210.1	Wurtzel_et_al	TSS	21619	21619	.	+	.	Name=TSS696
NC_003210.1	Wurtzel_et_al	TSS	2162187	2162187	.	+	.	Name=TSS697
NC_003210.1	Wurtzel_et_al	TSS	2164041	2164041	.	-	.	Name=TSS698
NC_003210.1	Wurtzel_et_al	TSS	216417	216417	.	+	.	Name=TSS699
NC_003210.1	Wurtzel_et_al	TSS	2167978	2167978	.	-	.	Name=TSS700
NC_003210.1	Wurtzel_et_al	TSS	2169125	2169125	.	-	.	Name=TSS701
NC_003210.1	Wurtzel_et_al	TSS	217060	217060	.	+	.	Name=TSS702
NC_003210.1	Wurtzel_et_al	TSS	2172006	2172006	.	+	.	Name=TSS703
NC_003210.1	Wurtzel_et_al	TSS	2172517	2172517	.	+	.	Name=TSS704
NC_003210.1	Wurtzel_et_al	TSS	2174997	2174997	.	-	.	Name=TSS705
NC_003210.1	Wurtzel_et_al	TSS	217779	217779	.	+	.	Name=TSS706
NC_003210.1	Wurtzel_et_al	TSS	2181269	2181269	.	-	.	Name=TSS707
NC_003210.1	Wurtzel_et_al	TSS	2181293	2181293	.	+	.	Name=TSS708
NC_003210.1	Wurtzel_et_al	TSS	2183832	2183832	.	-	.	Name=TSS709
NC_003210.1	Wurtzel_et_al	TSS	2184065	2184065	.	+	.	Name=TSS710
NC_003210.1	Wurtzel_et_al	TSS	2186922	2186922	.	-	.	Name=TSS711
NC_003210.1	Wurtzel_et_al	TSS	2187475	2187475	.	-	.	Name=TSS712
NC_003210.1	Wurtzel_et_al	TSS	2191487	2191487	.	-	.	Name=TSS713
NC_003210.1	Wurtzel_et_al	TSS	2192282	2192282	.	-	.	Name=TSS714
NC_003210.1	Wurtzel_et_al	TSS	2192357	2192357	.	+	.	Name=TSS715
NC_003210.1	Wurtzel_et_al	TSS	2192663	2192663	.	+	.	Name=TSS716
NC_003210.1	Wurtzel_et_al	TSS	2193606	2193606	.	+	.	Name=TSS717
NC_003210.1	Wurtzel_et_al	TSS	2194478	2194478	.	+	.	Name=TSS718
NC_003210.1	Wurtzel_et_al	TSS	2199221	2199221	.	-	.	Name=TSS719
NC_003210.1	Wurtzel_et_al	TSS	2201594	2201594	.	-	.	Name=TSS720
NC_003210.1	Wurtzel_et_al	TSS	2208468	2208468	.	-	.	Name=TSS721
NC_003210.1	Wurtzel_et_al	TSS	2210380	2210380	.	-	.	Name=TSS722
NC_003210.1	Wurtzel_et_al	TSS	2210565	2210565	.	+	.	Name=TSS723
NC_003210.1	Wurtzel_et_al	TSS	2212269	2212269	.	-	.	Name=TSS724
NC_003210.1	Wurtzel_et_al	TSS	2212660	2212660	.	-	.	Name=TSS725
NC_003210.1	Wurtzel_et_al	TSS	2213153	2213153	.	-	.	Name=TSS726
NC_003210.1	Wurtzel_et_al	TSS	2215539	2215539	.	+	.	Name=TSS727
NC_003210.1	Wurtzel_et_al	TSS	2215683	2215683	.	+	.	Name=TSS728
NC_003210.1	Wurtzel_et_al	TSS	2217207	2217207	.	+	.	Name=TSS729
NC_003210.1	Wurtzel_et_al	TSS	2223297	2223297	.	+	.	Name=TSS730
NC_003210.1	Wurtzel_et_al	TSS	222584	222584	.	+	.	Name=TSS731
NC_003210.1	Wurtzel_et_al	TSS	2226443	2226443	.	-	.	Name=TSS732
NC_003210.1	Wurtzel_et_al	TSS	2227229	2227229	.	-	.	Name=TSS733
NC_003210.1	Wurtzel_et_al	TSS	2227381	2227381	.	+	.	Name=TSS734
NC_003210.1	Wurtzel_et_al	TSS	2229963	2229963	.	-	.	Name=TSS735
NC_003210.1	Wurtzel_et_al	TSS	2231084	2231084	.	-	.	Name=TSS736
NC_003210.1	Wurtzel_et_al	TSS	2232021	2232021	.	-	.	Name=TSS737
NC_003210.1	Wurtzel_et_al	TSS	2232066	2232066	.	+	.	Name=TSS738
NC_003210.1	Wurtzel_et_al	TSS	2233134	2233134	.	+	.	Name=TSS739
NC_003210.1	Wurtzel_et_al	TSS	2234183	2234183	.	-	.	Name=TSS740
NC_003210.1	Wurtzel_et_al	TSS	223422	223422	.	+	.	Name=TSS741
NC_003210.1	Wurtzel_et_al	TSS	2234333	2234333	.	+	.	Name=TSS742
NC_003210.1	Wurtzel_et_al	TSS	2236807	2236807	.	-	.	Name=TSS743
NC_003210.1	Wurtzel_et_al	TSS	2239295	2239295	.	-	.	Name=TSS744
NC_003210.1	Wurtzel_et_al	TSS	2239640	2239640	.	+	.	Name=TSS745
NC_003210.1	Wurtzel_et_al	TSS	223995	223995	.	+	.	Name=TSS746
NC_003210.1	Wurtzel_et_al	TSS	2242004	2242004	.	-	.	Name=TSS747
NC_003210.1	Wurtzel_et_al	TSS	2242335	2242335	.	-	.	Name=TSS748
NC_003210.1	Wurtzel_et_al	TSS	224473	224473	.	+	.	Name=TSS749
NC_003210.1	Wurtzel_et_al	TSS	2250321	2250321	.	-	.	Name=TSS750
NC_003210.1	Wurtzel_et_al	TSS	2250407	2250407	.	+	.	Name=TSS751
NC_003210.1	Wurtzel_et_al	TSS	2256451	2256451	.	-	.	Name=TSS752
NC_003210.1	Wurtzel_et_al	TSS	2257690	2257690	.	-	.	Name=TSS753
NC_003210.1	Wurtzel_et_al	TSS	2258569	2258569	.	-	.	Name=TSS754
NC_003210.1	Wurtzel_et_al	TSS	2259344	2259344	.	+	.	Name=TSS755
NC_003210.1	Wurtzel_et_al	TSS	226640	226640	.	+	.	Name=TSS756
NC_003210.1	Wurtzel_et_al	TSS	2274841	2274841	.	-	.	Name=TSS757
NC_003210.1	Wurtzel_et_al	TSS	2277354	2277354	.	-	.	Name=TSS758
NC_003210.1	Wurtzel_et_al	TSS	2279350	2279350	.	-	.	Name=TSS759
NC_003210.1	Wurtzel_et_al	TSS	2280008	2280008	.	-	.	Name=TSS760
NC_003210.1	Wurtzel_et_al	TSS	2280389	2280389	.	-	.	Name=TSS761
NC_003210.1	Wurtzel_et_al	TSS	2281231	2281231	.	-	.	Name=TSS762
NC_003210.1	Wurtzel_et_al	TSS	2282299	2282299	.	-	.	Name=TSS763
NC_003210.1	Wurtzel_et_al	TSS	2282308	2282308	.	-	.	Name=TSS764
NC_003210.1	Wurtzel_et_al	TSS	2283335	2283335	.	-	.	Name=TSS765
NC_003210.1	Wurtzel_et_al	TSS	2283353	2283353	.	-	.	Name=TSS766
NC_003210.1	Wurtzel_et_al	TSS	2286256	2286256	.	-	.	Name=TSS767
NC_003210.1	Wurtzel_et_al	TSS	2287220	2287220	.	+	.	Name=TSS768
NC_003210.1	Wurtzel_et_al	TSS	2289016	2289016	.	-	.	Name=TSS769
NC_003210.1	Wurtzel_et_al	TSS	2289451	2289451	.	-	.	Name=TSS770
NC_003210.1	Wurtzel_et_al	TSS	229013	229013	.	+	.	Name=TSS771
NC_003210.1	Wurtzel_et_al	TSS	2290794	2290794	.	-	.	Name=TSS772
NC_003210.1	Wurtzel_et_al	TSS	2291994	2291994	.	-	.	Name=TSS773
NC_003210.1	Wurtzel_et_al	TSS	2293472	2293472	.	+	.	Name=TSS774
NC_003210.1	Wurtzel_et_al	TSS	2294510	2294510	.	-	.	Name=TSS775
NC_003210.1	Wurtzel_et_al	TSS	2297201	2297201	.	-	.	Name=TSS776
NC_003210.1	Wurtzel_et_al	TSS	2298007	2298007	.	-	.	Name=TSS777
NC_003210.1	Wurtzel_et_al	TSS	2298888	2298888	.	-	.	Name=TSS778
NC_003210.1	Wurtzel_et_al	TSS	2300202	2300202	.	-	.	Name=TSS779
NC_003210.1	Wurtzel_et_al	TSS	2302385	2302385	.	-	.	Name=TSS780
NC_003210.1	Wurtzel_et_al	TSS	2302473	2302473	.	+	.	Name=TSS781
NC_003210.1	Wurtzel_et_al	TSS	2305044	2305044	.	-	.	Name=TSS782
NC_003210.1	Wurtzel_et_al	TSS	2305143	2305143	.	+	.	Name=TSS783
NC_003210.1	Wurtzel_et_al	TSS	2305532	2305532	.	+	.	Name=TSS784
NC_003210.1	Wurtzel_et_al	TSS	2306124	2306124	.	+	.	Name=TSS785
NC_003210.1	Wurtzel_et_al	TSS	2306786	2306786	.	+	.	Name=TSS786
NC_003210.1	Wurtzel_et_al	TSS	230808	230808	.	+	.	Name=TSS787
NC_003210.1	Wurtzel_et_al	TSS	2308733	2308733	.	-	.	Name=TSS788
NC_003210.1	Wurtzel_et_al	TSS	2312727	2312727	.	-	.	Name=TSS789
NC_003210.1	Wurtzel_et_al	TSS	2313227	2313227	.	-	.	Name=TSS790
NC_003210.1	Wurtzel_et_al	TSS	2315895	2315895	.	-	.	Name=TSS791
NC_003210.1	Wurtzel_et_al	TSS	2317864	2317864	.	-	.	Name=TSS792
NC_003210.1	Wurtzel_et_al	TSS	2320145	2320145	.	-	.	Name=TSS793
NC_003210.1	Wurtzel_et_al	TSS	2320306	2320306	.	+	.	Name=TSS794
NC_003210.1	Wurtzel_et_al	TSS	2321830	2321830	.	+	.	Name=TSS795
NC_003210.1	Wurtzel_et_al	TSS	232644	232644	.	+	.	Name=TSS796
NC_003210.1	Wurtzel_et_al	TSS	2333247	2333247	.	-	.	Name=TSS797
NC_003210.1	Wurtzel_et_al	TSS	2333330	2333330	.	-	.	Name=TSS798
NC_003210.1	Wurtzel_et_al	TSS	2333874	2333874	.	-	.	Name=TSS799
NC_003210.1	Wurtzel_et_al	TSS	2333985	2333985	.	+	.	Name=TSS800
NC_003210.1	Wurtzel_et_al	TSS	2337444	2337444	.	-	.	Name=TSS801
NC_003210.1	Wurtzel_et_al	TSS	2337662	2337662	.	+	.	Name=TSS802
NC_003210.1	Wurtzel_et_al	TSS	2343709	2343709	.	-	.	Name=TSS803
NC_003210.1	Wurtzel_et_al	TSS	2345229	2345229	.	+	.	Name=TSS804
NC_003210.1	Wurtzel_et_al	TSS	2346108	2346108	.	-	.	Name=TSS805
NC_003210.1	Wurtzel_et_al	TSS	2346382	2346382	.	-	.	Name=TSS806
NC_003210.1	Wurtzel_et_al	TSS	2346807	2346807	.	-	.	Name=TSS807
NC_003210.1	Wurtzel_et_al	TSS	2347318	2347318	.	-	.	Name=TSS808
NC_003210.1	Wurtzel_et_al	TSS	2348569	2348569	.	-	.	Name=TSS809
NC_003210.1	Wurtzel_et_al	TSS	2349446	2349446	.	-	.	Name=TSS810
NC_003210.1	Wurtzel_et_al	TSS	2350055	2350055	.	+	.	Name=TSS811
NC_003210.1	Wurtzel_et_al	TSS	2350803	2350803	.	-	.	Name=TSS812
NC_003210.1	Wurtzel_et_al	TSS	2351324	2351324	.	-	.	Name=TSS813
NC_003210.1	Wurtzel_et_al	TSS	235489	235489	.	+	.	Name=TSS814
NC_003210.1	Wurtzel_et_al	TSS	2356350	2356350	.	-	.	Name=TSS815
NC_003210.1	Wurtzel_et_al	TSS	2359926	2359926	.	-	.	Name=TSS816
NC_003210.1	Wurtzel_et_al	TSS	2360318	2360318	.	+	.	Name=TSS817
NC_003210.1	Wurtzel_et_al	TSS	2360554	2360554	.	+	.	Name=TSS818
NC_003210.1	Wurtzel_et_al	TSS	2361155	2361155	.	-	.	Name=TSS819
NC_003210.1	Wurtzel_et_al	TSS	2361870	2361870	.	+	.	Name=TSS820
NC_003210.1	Wurtzel_et_al	TSS	2364449	2364449	.	-	.	Name=TSS821
NC_003210.1	Wurtzel_et_al	TSS	237236	237236	.	+	.	Name=TSS822
NC_003210.1	Wurtzel_et_al	TSS	2397277	2397277	.	-	.	Name=TSS823
NC_003210.1	Wurtzel_et_al	TSS	23976	23976	.	-	.	Name=TSS824
NC_003210.1	Wurtzel_et_al	TSS	2398564	2398564	.	-	.	Name=TSS825
NC_003210.1	Wurtzel_et_al	TSS	2398673	2398673	.	+	.	Name=TSS826
NC_003210.1	Wurtzel_et_al	TSS	2399430	2399430	.	+	.	Name=TSS827
NC_003210.1	Wurtzel_et_al	TSS	2400246	2400246	.	+	.	Name=TSS828
NC_003210.1	Wurtzel_et_al	TSS	2403252	2403252	.	-	.	Name=TSS829
NC_003210.1	Wurtzel_et_al	TSS	2406929	2406929	.	-	.	Name=TSS830
NC_003210.1	Wurtzel_et_al	TSS	2407099	2407099	.	+	.	Name=TSS831
NC_003210.1	Wurtzel_et_al	TSS	2408909	2408909	.	-	.	Name=TSS832
NC_003210.1	Wurtzel_et_al	TSS	2411039	2411039	.	-	.	Name=TSS833
NC_003210.1	Wurtzel_et_al	TSS	2411849	2411849	.	-	.	Name=TSS834
NC_003210.1	Wurtzel_et_al	TSS	24147	24147	.	+	.	Name=TSS835
NC_003210.1	Wurtzel_et_al	TSS	2418653	2418653	.	-	.	Name=TSS836
NC_003210.1	Wurtzel_et_al	TSS	2421787	2421787	.	-	.	Name=TSS837
NC_003210.1	Wurtzel_et_al	TSS	2424752	2424752	.	-	.	Name=TSS838
NC_003210.1	Wurtzel_et_al	TSS	2427017	2427017	.	-	.	Name=TSS839
NC_003210.1	Wurtzel_et_al	TSS	2427915	2427915	.	-	.	Name=TSS840
NC_003210.1	Wurtzel_et_al	TSS	2431355	2431355	.	-	.	Name=TSS841
NC_003210.1	Wurtzel_et_al	TSS	2434901	2434901	.	-	.	Name=TSS842
NC_003210.1	Wurtzel_et_al	TSS	2436190	2436190	.	-	.	Name=TSS843
NC_003210.1	Wurtzel_et_al	TSS	2436786	2436786	.	-	.	Name=TSS844
NC_003210.1	Wurtzel_et_al	TSS	2436966	2436966	.	-	.	Name=TSS845
NC_003210.1	Wurtzel_et_al	TSS	2437054	2437054	.	-	.	Name=TSS846
NC_003210.1	Wurtzel_et_al	TSS	2437192	2437192	.	-	.	Name=TSS847
NC_003210.1	Wurtzel_et_al	TSS	2437198	2437198	.	-	.	Name=TSS848
NC_003210.1	Wurtzel_et_al	TSS	2437200	2437200	.	-	.	Name=TSS849
NC_003210.1	Wurtzel_et_al	TSS	2437323	2437323	.	-	.	Name=TSS850
NC_003210.1	Wurtzel_et_al	TSS	2437331	2437331	.	-	.	Name=TSS851
NC_003210.1	Wurtzel_et_al	TSS	2437745	2437745	.	-	.	Name=TSS852
NC_003210.1	Wurtzel_et_al	TSS	2444146	2444146	.	-	.	Name=TSS853
NC_003210.1	Wurtzel_et_al	TSS	2445618	2445618	.	-	.	Name=TSS854
NC_003210.1	Wurtzel_et_al	TSS	2446142	2446142	.	-	.	Name=TSS855
NC_003210.1	Wurtzel_et_al	TSS	2446625	2446625	.	-	.	Name=TSS856
NC_003210.1	Wurtzel_et_al	TSS	2446720	2446720	.	+	.	Name=TSS857
NC_003210.1	Wurtzel_et_al	TSS	2448037	2448037	.	+	.	Name=TSS858
NC_003210.1	Wurtzel_et_al	TSS	2450232	2450232	.	-	.	Name=TSS859
NC_003210.1	Wurtzel_et_al	TSS	2450348	2450348	.	+	.	Name=TSS860
NC_003210.1	Wurtzel_et_al	TSS	2452994	2452994	.	-	.	Name=TSS861
NC_003210.1	Wurtzel_et_al	TSS	2454489	2454489	.	+	.	Name=TSS862
NC_003210.1	Wurtzel_et_al	TSS	2461120	2461120	.	-	.	Name=TSS863
NC_003210.1	Wurtzel_et_al	TSS	2461195	2461195	.	+	.	Name=TSS864
NC_003210.1	Wurtzel_et_al	TSS	2461772	2461772	.	+	.	Name=TSS865
NC_003210.1	Wurtzel_et_al	TSS	2463909	2463909	.	-	.	Name=TSS866
NC_003210.1	Wurtzel_et_al	TSS	2465309	2465309	.	-	.	Name=TSS867
NC_003210.1	Wurtzel_et_al	TSS	2465577	2465577	.	+	.	Name=TSS868
NC_003210.1	Wurtzel_et_al	TSS	2466685	2466685	.	+	.	Name=TSS869
NC_003210.1	Wurtzel_et_al	TSS	2467982	2467982	.	-	.	Name=TSS870
NC_003210.1	Wurtzel_et_al	TSS	2468166	2468166	.	-	.	Name=TSS871
NC_003210.1	Wurtzel_et_al	TSS	2472055	2472055	.	+	.	Name=TSS872
NC_003210.1	Wurtzel_et_al	TSS	2472409	2472409	.	+	.	Name=TSS873
NC_003210.1	Wurtzel_et_al	TSS	2474290	2474290	.	-	.	Name=TSS874
NC_003210.1	Wurtzel_et_al	TSS	2475887	2475887	.	-	.	Name=TSS875
NC_003210.1	Wurtzel_et_al	TSS	2475893	2475893	.	-	.	Name=TSS876
NC_003210.1	Wurtzel_et_al	TSS	2475900	2475900	.	-	.	Name=TSS877
NC_003210.1	Wurtzel_et_al	TSS	2476375	2476375	.	-	.	Name=TSS878
NC_003210.1	Wurtzel_et_al	TSS	2477270	2477270	.	-	.	Name=TSS879
NC_003210.1	Wurtzel_et_al	TSS	2477357	2477357	.	+	.	Name=TSS880
NC_003210.1	Wurtzel_et_al	TSS	2479495	2479495	.	-	.	Name=TSS881
NC_003210.1	Wurtzel_et_al	TSS	2479947	2479947	.	-	.	Name=TSS882
NC_003210.1	Wurtzel_et_al	TSS	2480295	2480295	.	+	.	Name=TSS883
NC_003210.1	Wurtzel_et_al	TSS	2481213	2481213	.	-	.	Name=TSS884
NC_003210.1	Wurtzel_et_al	TSS	2481602	2481602	.	-	.	Name=TSS885
NC_003210.1	Wurtzel_et_al	TSS	2483150	2483150	.	-	.	Name=TSS886
NC_003210.1	Wurtzel_et_al	TSS	2483171	2483171	.	-	.	Name=TSS887
NC_003210.1	Wurtzel_et_al	TSS	2483641	2483641	.	-	.	Name=TSS888
NC_003210.1	Wurtzel_et_al	TSS	2484834	2484834	.	-	.	Name=TSS889
NC_003210.1	Wurtzel_et_al	TSS	2484852	2484852	.	-	.	Name=TSS890
NC_003210.1	Wurtzel_et_al	TSS	2484860	2484860	.	-	.	Name=TSS891
NC_003210.1	Wurtzel_et_al	TSS	248502	248502	.	+	.	Name=TSS892
NC_003210.1	Wurtzel_et_al	TSS	2486952	2486952	.	-	.	Name=TSS893
NC_003210.1	Wurtzel_et_al	TSS	2487194	2487194	.	+	.	Name=TSS894
NC_003210.1	Wurtzel_et_al	TSS	2489267	2489267	.	-	.	Name=TSS895
NC_003210.1	Wurtzel_et_al	TSS	2489486	2489486	.	-	.	Name=TSS896
NC_003210.1	Wurtzel_et_al	TSS	2491227	2491227	.	-	.	Name=TSS897
NC_003210.1	Wurtzel_et_al	TSS	2492744	2492744	.	-	.	Name=TSS898
NC_003210.1	Wurtzel_et_al	TSS	2495311	2495311	.	-	.	Name=TSS899
NC_003210.1	Wurtzel_et_al	TSS	2495318	2495318	.	-	.	Name=TSS900
NC_003210.1	Wurtzel_et_al	TSS	2495688	2495688	.	-	.	Name=TSS901
NC_003210.1	Wurtzel_et_al	TSS	2497054	2497054	.	-	.	Name=TSS902
NC_003210.1	Wurtzel_et_al	TSS	2497360	2497360	.	-	.	Name=TSS903
NC_003210.1	Wurtzel_et_al	TSS	2501182	2501182	.	-	.	Name=TSS904
NC_003210.1	Wurtzel_et_al	TSS	2501290	2501290	.	+	.	Name=TSS905
NC_003210.1	Wurtzel_et_al	TSS	250133	250133	.	+	.	Name=TSS906
NC_003210.1	Wurtzel_et_al	TSS	2503838	2503838	.	-	.	Name=TSS907
NC_003210.1	Wurtzel_et_al	TSS	2504787	2504787	.	-	.	Name=TSS908
NC_003210.1	Wurtzel_et_al	TSS	2505277	2505277	.	-	.	Name=TSS909
NC_003210.1	Wurtzel_et_al	TSS	250591	250591	.	+	.	Name=TSS910
NC_003210.1	Wurtzel_et_al	TSS	2506469	2506469	.	+	.	Name=TSS911
NC_003210.1	Wurtzel_et_al	TSS	2507268	2507268	.	-	.	Name=TSS912
NC_003210.1	Wurtzel_et_al	TSS	2508225	2508225	.	-	.	Name=TSS913
NC_003210.1	Wurtzel_et_al	TSS	2508840	2508840	.	-	.	Name=TSS914
NC_003210.1	Wurtzel_et_al	TSS	2509430	2509430	.	-	.	Name=TSS915
NC_003210.1	Wurtzel_et_al	TSS	2520443	2520443	.	-	.	Name=TSS916
NC_003210.1	Wurtzel_et_al	TSS	2521820	2521820	.	-	.	Name=TSS917
NC_003210.1	Wurtzel_et_al	TSS	2522824	2522824	.	-	.	Name=TSS918
NC_003210.1	Wurtzel_et_al	TSS	2522950	2522950	.	-	.	Name=TSS919
NC_003210.1	Wurtzel_et_al	TSS	2524101	2524101	.	-	.	Name=TSS920
NC_003210.1	Wurtzel_et_al	TSS	2525004	2525004	.	-	.	Name=TSS921
NC_003210.1	Wurtzel_et_al	TSS	2525844	2525844	.	-	.	Name=TSS922
NC_003210.1	Wurtzel_et_al	TSS	2526130	2526130	.	-	.	Name=TSS923
NC_003210.1	Wurtzel_et_al	TSS	2527601	2527601	.	-	.	Name=TSS924
NC_003210.1	Wurtzel_et_al	TSS	252952	252952	.	+	.	Name=TSS925
NC_003210.1	Wurtzel_et_al	TSS	253178	253178	.	+	.	Name=TSS926
NC_003210.1	Wurtzel_et_al	TSS	2532345	2532345	.	-	.	Name=TSS927
NC_003210.1	Wurtzel_et_al	TSS	2533615	2533615	.	-	.	Name=TSS928
NC_003210.1	Wurtzel_et_al	TSS	2535243	2535243	.	-	.	Name=TSS929
NC_003210.1	Wurtzel_et_al	TSS	2536292	2536292	.	-	.	Name=TSS930
NC_003210.1	Wurtzel_et_al	TSS	2539630	2539630	.	-	.	Name=TSS931
NC_003210.1	Wurtzel_et_al	TSS	2539785	2539785	.	+	.	Name=TSS932
NC_003210.1	Wurtzel_et_al	TSS	2541876	2541876	.	-	.	Name=TSS933
NC_003210.1	Wurtzel_et_al	TSS	2541971	2541971	.	+	.	Name=TSS934
NC_003210.1	Wurtzel_et_al	TSS	2544120	2544120	.	-	.	Name=TSS935
NC_003210.1	Wurtzel_et_al	TSS	254641	254641	.	+	.	Name=TSS936
NC_003210.1	Wurtzel_et_al	TSS	2549386	2549386	.	-	.	Name=TSS937
NC_003210.1	Wurtzel_et_al	TSS	2552295	2552295	.	-	.	Name=TSS938
NC_003210.1	Wurtzel_et_al	TSS	2552808	2552808	.	-	.	Name=TSS939
NC_003210.1	Wurtzel_et_al	TSS	2553323	2553323	.	-	.	Name=TSS940
NC_003210.1	Wurtzel_et_al	TSS	2554415	2554415	.	-	.	Name=TSS941
NC_003210.1	Wurtzel_et_al	TSS	2555954	2555954	.	-	.	Name=TSS942
NC_003210.1	Wurtzel_et_al	TSS	2556530	2556530	.	-	.	Name=TSS943
NC_003210.1	Wurtzel_et_al	TSS	2558836	2558836	.	-	.	Name=TSS944
NC_003210.1	Wurtzel_et_al	TSS	2559135	2559135	.	-	.	Name=TSS945
NC_003210.1	Wurtzel_et_al	TSS	255978	255978	.	+	.	Name=TSS946
NC_003210.1	Wurtzel_et_al	TSS	2561024	2561024	.	-	.	Name=TSS947
NC_003210.1	Wurtzel_et_al	TSS	2561067	2561067	.	-	.	Name=TSS948
NC_003210.1	Wurtzel_et_al	TSS	2562460	2562460	.	-	.	Name=TSS949
NC_003210.1	Wurtzel_et_al	TSS	2567548	2567548	.	-	.	Name=TSS950
NC_003210.1	Wurtzel_et_al	TSS	2568653	2568653	.	-	.	Name=TSS951
NC_003210.1	Wurtzel_et_al	TSS	2569456	2569456	.	-	.	Name=TSS952
NC_003210.1	Wurtzel_et_al	TSS	2577580	2577580	.	-	.	Name=TSS953
NC_003210.1	Wurtzel_et_al	TSS	2580377	2580377	.	-	.	Name=TSS954
NC_003210.1	Wurtzel_et_al	TSS	258552	258552	.	+	.	Name=TSS955
NC_003210.1	Wurtzel_et_al	TSS	2586135	2586135	.	-	.	Name=TSS956
NC_003210.1	Wurtzel_et_al	TSS	2589896	2589896	.	-	.	Name=TSS957
NC_003210.1	Wurtzel_et_al	TSS	2590745	2590745	.	-	.	Name=TSS958
NC_003210.1	Wurtzel_et_al	TSS	2592783	2592783	.	-	.	Name=TSS959
NC_003210.1	Wurtzel_et_al	TSS	2594650	2594650	.	-	.	Name=TSS960
NC_003210.1	Wurtzel_et_al	TSS	2596237	2596237	.	+	.	Name=TSS961
NC_003210.1	Wurtzel_et_al	TSS	2600309	2600309	.	-	.	Name=TSS962
NC_003210.1	Wurtzel_et_al	TSS	2601270	2601270	.	-	.	Name=TSS963
NC_003210.1	Wurtzel_et_al	TSS	2603745	2603745	.	-	.	Name=TSS964
NC_003210.1	Wurtzel_et_al	TSS	2605232	2605232	.	-	.	Name=TSS965
NC_003210.1	Wurtzel_et_al	TSS	2606147	2606147	.	-	.	Name=TSS966
NC_003210.1	Wurtzel_et_al	TSS	2608993	2608993	.	-	.	Name=TSS967
NC_003210.1	Wurtzel_et_al	TSS	2610621	2610621	.	-	.	Name=TSS968
NC_003210.1	Wurtzel_et_al	TSS	2610633	2610633	.	-	.	Name=TSS969
NC_003210.1	Wurtzel_et_al	TSS	2611434	2611434	.	-	.	Name=TSS970
NC_003210.1	Wurtzel_et_al	TSS	2612753	2612753	.	-	.	Name=TSS971
NC_003210.1	Wurtzel_et_al	TSS	2614691	2614691	.	-	.	Name=TSS972
NC_003210.1	Wurtzel_et_al	TSS	2615356	2615356	.	-	.	Name=TSS973
NC_003210.1	Wurtzel_et_al	TSS	2616751	2616751	.	-	.	Name=TSS974
NC_003210.1	Wurtzel_et_al	TSS	261817	261817	.	+	.	Name=TSS975
NC_003210.1	Wurtzel_et_al	TSS	2618303	2618303	.	-	.	Name=TSS976
NC_003210.1	Wurtzel_et_al	TSS	2619275	2619275	.	-	.	Name=TSS977
NC_003210.1	Wurtzel_et_al	TSS	262064	262064	.	+	.	Name=TSS978
NC_003210.1	Wurtzel_et_al	TSS	2621120	2621120	.	-	.	Name=TSS979
NC_003210.1	Wurtzel_et_al	TSS	2622629	2622629	.	-	.	Name=TSS980
NC_003210.1	Wurtzel_et_al	TSS	2624487	2624487	.	-	.	Name=TSS981
NC_003210.1	Wurtzel_et_al	TSS	2624942	2624942	.	-	.	Name=TSS982
NC_003210.1	Wurtzel_et_al	TSS	2626397	2626397	.	-	.	Name=TSS983
NC_003210.1	Wurtzel_et_al	TSS	2629119	2629119	.	-	.	Name=TSS984
NC_003210.1	Wurtzel_et_al	TSS	2632628	2632628	.	-	.	Name=TSS985
NC_003210.1	Wurtzel_et_al	TSS	263306	263306	.	+	.	Name=TSS986
NC_003210.1	Wurtzel_et_al	TSS	2633862	2633862	.	-	.	Name=TSS987
NC_003210.1	Wurtzel_et_al	TSS	2634876	2634876	.	-	.	Name=TSS988
NC_003210.1	Wurtzel_et_al	TSS	2635114	2635114	.	+	.	Name=TSS989
NC_003210.1	Wurtzel_et_al	TSS	263754	263754	.	+	.	Name=TSS990
NC_003210.1	Wurtzel_et_al	TSS	2637680	2637680	.	+	.	Name=TSS991
NC_003210.1	Wurtzel_et_al	TSS	2639789	2639789	.	-	.	Name=TSS992
NC_003210.1	Wurtzel_et_al	TSS	2640531	2640531	.	-	.	Name=TSS993
NC_003210.1	Wurtzel_et_al	TSS	2642985	2642985	.	-	.	Name=TSS994
NC_003210.1	Wurtzel_et_al	TSS	2643728	2643728	.	+	.	Name=TSS995
NC_003210.1	Wurtzel_et_al	TSS	2646361	2646361	.	-	.	Name=TSS996
NC_003210.1	Wurtzel_et_al	TSS	2648906	2648906	.	-	.	Name=TSS997
NC_003210.1	Wurtzel_et_al	TSS	264945	264945	.	+	.	Name=TSS998
NC_003210.1	Wurtzel_et_al	TSS	2649599	2649599	.	-	.	Name=TSS999
NC_003210.1	Wurtzel_et_al	TSS	2651771	2651771	.	-	.	Name=TSS1000
NC_003210.1	Wurtzel_et_al	TSS	2652148	2652148	.	-	.	Name=TSS1001
NC_003210.1	Wurtzel_et_al	TSS	2653123	2653123	.	-	.	Name=TSS1002
NC_003210.1	Wurtzel_et_al	TSS	2658887	2658887	.	-	.	Name=TSS1003
NC_003210.1	Wurtzel_et_al	TSS	2662189	2662189	.	-	.	Name=TSS1004
NC_003210.1	Wurtzel_et_al	TSS	266237	266237	.	+	.	Name=TSS1005
NC_003210.1	Wurtzel_et_al	TSS	2664326	2664326	.	-	.	Name=TSS1006
NC_003210.1	Wurtzel_et_al	TSS	2668692	2668692	.	-	.	Name=TSS1007
NC_003210.1	Wurtzel_et_al	TSS	2668835	2668835	.	+	.	Name=TSS1008
NC_003210.1	Wurtzel_et_al	TSS	2671562	2671562	.	-	.	Name=TSS1009
NC_003210.1	Wurtzel_et_al	TSS	2672736	2672736	.	-	.	Name=TSS1010
NC_003210.1	Wurtzel_et_al	TSS	267503	267503	.	+	.	Name=TSS1011
NC_003210.1	Wurtzel_et_al	TSS	2679364	2679364	.	-	.	Name=TSS1012
NC_003210.1	Wurtzel_et_al	TSS	2679571	2679571	.	+	.	Name=TSS1013
NC_003210.1	Wurtzel_et_al	TSS	2682489	2682489	.	-	.	Name=TSS1014
NC_003210.1	Wurtzel_et_al	TSS	2682993	2682993	.	-	.	Name=TSS1015
NC_003210.1	Wurtzel_et_al	TSS	2684647	2684647	.	-	.	Name=TSS1016
NC_003210.1	Wurtzel_et_al	TSS	2684674	2684674	.	-	.	Name=TSS1017
NC_003210.1	Wurtzel_et_al	TSS	2684683	2684683	.	-	.	Name=TSS1018
NC_003210.1	Wurtzel_et_al	TSS	2685233	2685233	.	-	.	Name=TSS1019
NC_003210.1	Wurtzel_et_al	TSS	2688557	2688557	.	-	.	Name=TSS1020
NC_003210.1	Wurtzel_et_al	TSS	2689409	2689409	.	+	.	Name=TSS1021
NC_003210.1	Wurtzel_et_al	TSS	2691488	2691488	.	-	.	Name=TSS1022
NC_003210.1	Wurtzel_et_al	TSS	2693045	2693045	.	-	.	Name=TSS1023
NC_003210.1	Wurtzel_et_al	TSS	2693565	2693565	.	-	.	Name=TSS1024
NC_003210.1	Wurtzel_et_al	TSS	2693954	2693954	.	-	.	Name=TSS1025
NC_003210.1	Wurtzel_et_al	TSS	2693960	2693960	.	-	.	Name=TSS1026
NC_003210.1	Wurtzel_et_al	TSS	2693966	2693966	.	-	.	Name=TSS1027
NC_003210.1	Wurtzel_et_al	TSS	2694411	2694411	.	-	.	Name=TSS1028
NC_003210.1	Wurtzel_et_al	TSS	2696805	2696805	.	-	.	Name=TSS1029
NC_003210.1	Wurtzel_et_al	TSS	2696817	2696817	.	-	.	Name=TSS1030
NC_003210.1	Wurtzel_et_al	TSS	2697251	2697251	.	-	.	Name=TSS1031
NC_003210.1	Wurtzel_et_al	TSS	2697487	2697487	.	-	.	Name=TSS1032
NC_003210.1	Wurtzel_et_al	TSS	2697494	2697494	.	-	.	Name=TSS1033
NC_003210.1	Wurtzel_et_al	TSS	2697992	2697992	.	-	.	Name=TSS1034
NC_003210.1	Wurtzel_et_al	TSS	2698378	2698378	.	-	.	Name=TSS1035
NC_003210.1	Wurtzel_et_al	TSS	2698397	2698397	.	-	.	Name=TSS1036
NC_003210.1	Wurtzel_et_al	TSS	2698949	2698949	.	-	.	Name=TSS1037
NC_003210.1	Wurtzel_et_al	TSS	2699389	2699389	.	-	.	Name=TSS1038
NC_003210.1	Wurtzel_et_al	TSS	2699593	2699593	.	-	.	Name=TSS1039
NC_003210.1	Wurtzel_et_al	TSS	2699603	2699603	.	-	.	Name=TSS1040
NC_003210.1	Wurtzel_et_al	TSS	2700167	2700167	.	-	.	Name=TSS1041
NC_003210.1	Wurtzel_et_al	TSS	2700188	2700188	.	-	.	Name=TSS1042
NC_003210.1	Wurtzel_et_al	TSS	2700955	2700955	.	-	.	Name=TSS1043
NC_003210.1	Wurtzel_et_al	TSS	2701261	2701261	.	-	.	Name=TSS1044
NC_003210.1	Wurtzel_et_al	TSS	2701469	2701469	.	-	.	Name=TSS1045
NC_003210.1	Wurtzel_et_al	TSS	2702559	2702559	.	-	.	Name=TSS1046
NC_003210.1	Wurtzel_et_al	TSS	2702913	2702913	.	-	.	Name=TSS1047
NC_003210.1	Wurtzel_et_al	TSS	2702929	2702929	.	-	.	Name=TSS1048
NC_003210.1	Wurtzel_et_al	TSS	2703264	2703264	.	-	.	Name=TSS1049
NC_003210.1	Wurtzel_et_al	TSS	270348	270348	.	+	.	Name=TSS1050
NC_003210.1	Wurtzel_et_al	TSS	2704138	2704138	.	-	.	Name=TSS1051
NC_003210.1	Wurtzel_et_al	TSS	2704483	2704483	.	-	.	Name=TSS1052
NC_003210.1	Wurtzel_et_al	TSS	2705083	2705083	.	-	.	Name=TSS1053
NC_003210.1	Wurtzel_et_al	TSS	2706233	2706233	.	-	.	Name=TSS1054
NC_003210.1	Wurtzel_et_al	TSS	2709393	2709393	.	-	.	Name=TSS1055
NC_003210.1	Wurtzel_et_al	TSS	2710512	2710512	.	-	.	Name=TSS1056
NC_003210.1	Wurtzel_et_al	TSS	2710794	2710794	.	+	.	Name=TSS1057
NC_003210.1	Wurtzel_et_al	TSS	2712901	2712901	.	+	.	Name=TSS1058
NC_003210.1	Wurtzel_et_al	TSS	2718257	2718257	.	-	.	Name=TSS1059
NC_003210.1	Wurtzel_et_al	TSS	2723640	2723640	.	-	.	Name=TSS1060
NC_003210.1	Wurtzel_et_al	TSS	2725899	2725899	.	-	.	Name=TSS1061
NC_003210.1	Wurtzel_et_al	TSS	2727267	2727267	.	-	.	Name=TSS1062
NC_003210.1	Wurtzel_et_al	TSS	272765	272765	.	+	.	Name=TSS1063
NC_003210.1	Wurtzel_et_al	TSS	2729448	2729448	.	-	.	Name=TSS1064
NC_003210.1	Wurtzel_et_al	TSS	2729961	2729961	.	-	.	Name=TSS1065
NC_003210.1	Wurtzel_et_al	TSS	2729968	2729968	.	-	.	Name=TSS1066
NC_003210.1	Wurtzel_et_al	TSS	2730505	2730505	.	-	.	Name=TSS1067
NC_003210.1	Wurtzel_et_al	TSS	2732424	2732424	.	-	.	Name=TSS1068
NC_003210.1	Wurtzel_et_al	TSS	2732482	2732482	.	-	.	Name=TSS1069
NC_003210.1	Wurtzel_et_al	TSS	2742974	2742974	.	-	.	Name=TSS1070
NC_003210.1	Wurtzel_et_al	TSS	2744173	2744173	.	-	.	Name=TSS1071
NC_003210.1	Wurtzel_et_al	TSS	2744954	2744954	.	-	.	Name=TSS1072
NC_003210.1	Wurtzel_et_al	TSS	2745808	2745808	.	-	.	Name=TSS1073
NC_003210.1	Wurtzel_et_al	TSS	2745876	2745876	.	+	.	Name=TSS1074
NC_003210.1	Wurtzel_et_al	TSS	2746396	2746396	.	+	.	Name=TSS1075
NC_003210.1	Wurtzel_et_al	TSS	2747032	2747032	.	+	.	Name=TSS1076
NC_003210.1	Wurtzel_et_al	TSS	2749549	2749549	.	-	.	Name=TSS1077
NC_003210.1	Wurtzel_et_al	TSS	27497	27497	.	+	.	Name=TSS1078
NC_003210.1	Wurtzel_et_al	TSS	2757574	2757574	.	+	.	Name=TSS1079
NC_003210.1	Wurtzel_et_al	TSS	2757953	2757953	.	+	.	Name=TSS1080
NC_003210.1	Wurtzel_et_al	TSS	2760711	2760711	.	-	.	Name=TSS1081
NC_003210.1	Wurtzel_et_al	TSS	2766127	2766127	.	-	.	Name=TSS1082
NC_003210.1	Wurtzel_et_al	TSS	2766809	2766809	.	-	.	Name=TSS1083
NC_003210.1	Wurtzel_et_al	TSS	2766904	2766904	.	+	.	Name=TSS1084
NC_003210.1	Wurtzel_et_al	TSS	2769305	2769305	.	-	.	Name=TSS1085
NC_003210.1	Wurtzel_et_al	TSS	2770040	2770040	.	-	.	Name=TSS1086
NC_003210.1	Wurtzel_et_al	TSS	2771465	2771465	.	-	.	Name=TSS1087
NC_003210.1	Wurtzel_et_al	TSS	2771592	2771592	.	+	.	Name=TSS1088
NC_003210.1	Wurtzel_et_al	TSS	2775617	2775617	.	+	.	Name=TSS1089
NC_003210.1	Wurtzel_et_al	TSS	2775792	2775792	.	+	.	Name=TSS1090
NC_003210.1	Wurtzel_et_al	TSS	2776817	2776817	.	-	.	Name=TSS1091
NC_003210.1	Wurtzel_et_al	TSS	2777416	2777416	.	-	.	Name=TSS1092
NC_003210.1	Wurtzel_et_al	TSS	2777838	2777838	.	-	.	Name=TSS1093
NC_003210.1	Wurtzel_et_al	TSS	2777849	2777849	.	-	.	Name=TSS1094
NC_003210.1	Wurtzel_et_al	TSS	2779616	2779616	.	-	.	Name=TSS1095
NC_003210.1	Wurtzel_et_al	TSS	2780402	2780402	.	-	.	Name=TSS1096
NC_003210.1	Wurtzel_et_al	TSS	2780816	2780816	.	-	.	Name=TSS1097
NC_003210.1	Wurtzel_et_al	TSS	2782512	2782512	.	-	.	Name=TSS1098
NC_003210.1	Wurtzel_et_al	TSS	2782704	2782704	.	+	.	Name=TSS1099
NC_003210.1	Wurtzel_et_al	TSS	2784302	2784302	.	-	.	Name=TSS1100
NC_003210.1	Wurtzel_et_al	TSS	2784375	2784375	.	+	.	Name=TSS1101
NC_003210.1	Wurtzel_et_al	TSS	2786344	2786344	.	-	.	Name=TSS1102
NC_003210.1	Wurtzel_et_al	TSS	2788388	2788388	.	-	.	Name=TSS1103
NC_003210.1	Wurtzel_et_al	TSS	2791998	2791998	.	-	.	Name=TSS1104
NC_003210.1	Wurtzel_et_al	TSS	2792009	2792009	.	-	.	Name=TSS1105
NC_003210.1	Wurtzel_et_al	TSS	2792160	2792160	.	-	.	Name=TSS1106
NC_003210.1	Wurtzel_et_al	TSS	2794580	2794580	.	-	.	Name=TSS1107
NC_003210.1	Wurtzel_et_al	TSS	2795254	2795254	.	-	.	Name=TSS1108
NC_003210.1	Wurtzel_et_al	TSS	2795360	2795360	.	+	.	Name=TSS1109
NC_003210.1	Wurtzel_et_al	TSS	279708	279708	.	+	.	Name=TSS1110
NC_003210.1	Wurtzel_et_al	TSS	2797782	2797782	.	-	.	Name=TSS1111
NC_003210.1	Wurtzel_et_al	TSS	2797806	2797806	.	+	.	Name=TSS1112
NC_003210.1	Wurtzel_et_al	TSS	2798064	2798064	.	+	.	Name=TSS1113
NC_003210.1	Wurtzel_et_al	TSS	2798603	2798603	.	+	.	Name=TSS1114
NC_003210.1	Wurtzel_et_al	TSS	2799580	2799580	.	-	.	Name=TSS1115
NC_003210.1	Wurtzel_et_al	TSS	2801459	2801459	.	-	.	Name=TSS1116
NC_003210.1	Wurtzel_et_al	TSS	2801556	2801556	.	+	.	Name=TSS1117
NC_003210.1	Wurtzel_et_al	TSS	280392	280392	.	+	.	Name=TSS1118
NC_003210.1	Wurtzel_et_al	TSS	2804464	2804464	.	-	.	Name=TSS1119
NC_003210.1	Wurtzel_et_al	TSS	2805302	2805302	.	-	.	Name=TSS1120
NC_003210.1	Wurtzel_et_al	TSS	2805401	2805401	.	+	.	Name=TSS1121
NC_003210.1	Wurtzel_et_al	TSS	280989	280989	.	+	.	Name=TSS1122
NC_003210.1	Wurtzel_et_al	TSS	2815361	2815361	.	-	.	Name=TSS1123
NC_003210.1	Wurtzel_et_al	TSS	2817597	2817597	.	-	.	Name=TSS1124
NC_003210.1	Wurtzel_et_al	TSS	2818736	2818736	.	-	.	Name=TSS1125
NC_003210.1	Wurtzel_et_al	TSS	2819818	2819818	.	+	.	Name=TSS1126
NC_003210.1	Wurtzel_et_al	TSS	2820726	2820726	.	+	.	Name=TSS1127
NC_003210.1	Wurtzel_et_al	TSS	2822658	2822658	.	-	.	Name=TSS1128
NC_003210.1	Wurtzel_et_al	TSS	2823486	2823486	.	-	.	Name=TSS1129
NC_003210.1	Wurtzel_et_al	TSS	2823974	2823974	.	-	.	Name=TSS1130
NC_003210.1	Wurtzel_et_al	TSS	2830247	2830247	.	+	.	Name=TSS1131
NC_003210.1	Wurtzel_et_al	TSS	2837807	2837807	.	-	.	Name=TSS1132
NC_003210.1	Wurtzel_et_al	TSS	2839573	2839573	.	-	.	Name=TSS1133
NC_003210.1	Wurtzel_et_al	TSS	2840244	2840244	.	-	.	Name=TSS1134
NC_003210.1	Wurtzel_et_al	TSS	2842362	2842362	.	+	.	Name=TSS1135
NC_003210.1	Wurtzel_et_al	TSS	284308	284308	.	+	.	Name=TSS1136
NC_003210.1	Wurtzel_et_al	TSS	2848360	2848360	.	-	.	Name=TSS1137
NC_003210.1	Wurtzel_et_al	TSS	2849566	2849566	.	-	.	Name=TSS1138
NC_003210.1	Wurtzel_et_al	TSS	2849576	2849576	.	-	.	Name=TSS1139
NC_003210.1	Wurtzel_et_al	TSS	2850464	2850464	.	-	.	Name=TSS1140
NC_003210.1	Wurtzel_et_al	TSS	2857320	2857320	.	-	.	Name=TSS1141
NC_003210.1	Wurtzel_et_al	TSS	2861280	2861280	.	+	.	Name=TSS1142
NC_003210.1	Wurtzel_et_al	TSS	2864726	2864726	.	-	.	Name=TSS1143
NC_003210.1	Wurtzel_et_al	TSS	2871146	2871146	.	-	.	Name=TSS1144
NC_003210.1	Wurtzel_et_al	TSS	2872846	2872846	.	-	.	Name=TSS1145
NC_003210.1	Wurtzel_et_al	TSS	2876672	2876672	.	-	.	Name=TSS1146
NC_003210.1	Wurtzel_et_al	TSS	2876803	2876803	.	-	.	Name=TSS1147
NC_003210.1	Wurtzel_et_al	TSS	2877167	2877167	.	-	.	Name=TSS1148
NC_003210.1	Wurtzel_et_al	TSS	287826	287826	.	+	.	Name=TSS1149
NC_003210.1	Wurtzel_et_al	TSS	2878812	2878812	.	-	.	Name=TSS1150
NC_003210.1	Wurtzel_et_al	TSS	2879769	2879769	.	-	.	Name=TSS1151
NC_003210.1	Wurtzel_et_al	TSS	2880301	2880301	.	-	.	Name=TSS1152
NC_003210.1	Wurtzel_et_al	TSS	2881138	2881138	.	-	.	Name=TSS1153
NC_003210.1	Wurtzel_et_al	TSS	288225	288225	.	+	.	Name=TSS1154
NC_003210.1	Wurtzel_et_al	TSS	2882256	2882256	.	-	.	Name=TSS1155
NC_003210.1	Wurtzel_et_al	TSS	2887344	2887344	.	-	.	Name=TSS1156
NC_003210.1	Wurtzel_et_al	TSS	2888321	2888321	.	-	.	Name=TSS1157
NC_003210.1	Wurtzel_et_al	TSS	2890699	2890699	.	-	.	Name=TSS1158
NC_003210.1	Wurtzel_et_al	TSS	289119	289119	.	+	.	Name=TSS1159
NC_003210.1	Wurtzel_et_al	TSS	2892470	2892470	.	-	.	Name=TSS1160
NC_003210.1	Wurtzel_et_al	TSS	28964	28964	.	+	.	Name=TSS1161
NC_003210.1	Wurtzel_et_al	TSS	2898403	2898403	.	-	.	Name=TSS1162
NC_003210.1	Wurtzel_et_al	TSS	2898477	2898477	.	+	.	Name=TSS1163
NC_003210.1	Wurtzel_et_al	TSS	2904445	2904445	.	-	.	Name=TSS1164
NC_003210.1	Wurtzel_et_al	TSS	290567	290567	.	+	.	Name=TSS1165
NC_003210.1	Wurtzel_et_al	TSS	2906972	2906972	.	-	.	Name=TSS1166
NC_003210.1	Wurtzel_et_al	TSS	2912286	2912286	.	-	.	Name=TSS1167
NC_003210.1	Wurtzel_et_al	TSS	2913898	2913898	.	-	.	Name=TSS1168
NC_003210.1	Wurtzel_et_al	TSS	2915680	2915680	.	-	.	Name=TSS1169
NC_003210.1	Wurtzel_et_al	TSS	2916111	2916111	.	-	.	Name=TSS1170
NC_003210.1	Wurtzel_et_al	TSS	2917279	2917279	.	-	.	Name=TSS1171
NC_003210.1	Wurtzel_et_al	TSS	2919237	2919237	.	-	.	Name=TSS1172
NC_003210.1	Wurtzel_et_al	TSS	2929120	2929120	.	-	.	Name=TSS1173
NC_003210.1	Wurtzel_et_al	TSS	2929260	2929260	.	+	.	Name=TSS1174
NC_003210.1	Wurtzel_et_al	TSS	2933171	2933171	.	-	.	Name=TSS1175
NC_003210.1	Wurtzel_et_al	TSS	2933271	2933271	.	+	.	Name=TSS1176
NC_003210.1	Wurtzel_et_al	TSS	2940026	2940026	.	+	.	Name=TSS1177
NC_003210.1	Wurtzel_et_al	TSS	2942254	2942254	.	-	.	Name=TSS1178
NC_003210.1	Wurtzel_et_al	TSS	2942262	2942262	.	-	.	Name=TSS1179
NC_003210.1	Wurtzel_et_al	TSS	2943376	2943376	.	-	.	Name=TSS1180
NC_003210.1	Wurtzel_et_al	TSS	2943754	2943754	.	-	.	Name=TSS1181
NC_003210.1	Wurtzel_et_al	TSS	2944379	2944379	.	-	.	Name=TSS1182
NC_003210.1	Wurtzel_et_al	TSS	295324	295324	.	-	.	Name=TSS1183
NC_003210.1	Wurtzel_et_al	TSS	296241	296241	.	-	.	Name=TSS1184
NC_003210.1	Wurtzel_et_al	TSS	296320	296320	.	+	.	Name=TSS1185
NC_003210.1	Wurtzel_et_al	TSS	297658	297658	.	-	.	Name=TSS1186
NC_003210.1	Wurtzel_et_al	TSS	298784	298784	.	-	.	Name=TSS1187
NC_003210.1	Wurtzel_et_al	TSS	299514	299514	.	-	.	Name=TSS1188
NC_003210.1	Wurtzel_et_al	TSS	299570	299570	.	+	.	Name=TSS1189
NC_003210.1	Wurtzel_et_al	TSS	300052	300052	.	+	.	Name=TSS1190
NC_003210.1	Wurtzel_et_al	TSS	301747	301747	.	-	.	Name=TSS1191
NC_003210.1	Wurtzel_et_al	TSS	301975	301975	.	+	.	Name=TSS1192
NC_003210.1	Wurtzel_et_al	TSS	306578	306578	.	-	.	Name=TSS1193
NC_003210.1	Wurtzel_et_al	TSS	309385	309385	.	-	.	Name=TSS1194
NC_003210.1	Wurtzel_et_al	TSS	309510	309510	.	+	.	Name=TSS1195
NC_003210.1	Wurtzel_et_al	TSS	31064	31064	.	+	.	Name=TSS1196
NC_003210.1	Wurtzel_et_al	TSS	310794	310794	.	+	.	Name=TSS1197
NC_003210.1	Wurtzel_et_al	TSS	311796	311796	.	+	.	Name=TSS1198
NC_003210.1	Wurtzel_et_al	TSS	315916	315916	.	+	.	Name=TSS1199
NC_003210.1	Wurtzel_et_al	TSS	316838	316838	.	+	.	Name=TSS1200
NC_003210.1	Wurtzel_et_al	TSS	319024	319024	.	+	.	Name=TSS1201
NC_003210.1	Wurtzel_et_al	TSS	32161	32161	.	+	.	Name=TSS1202
NC_003210.1	Wurtzel_et_al	TSS	324033	324033	.	-	.	Name=TSS1203
NC_003210.1	Wurtzel_et_al	TSS	327476	327476	.	-	.	Name=TSS1204
NC_003210.1	Wurtzel_et_al	TSS	327586	327586	.	+	.	Name=TSS1205
NC_003210.1	Wurtzel_et_al	TSS	327889	327889	.	+	.	Name=TSS1206
NC_003210.1	Wurtzel_et_al	TSS	328662	328662	.	+	.	Name=TSS1207
NC_003210.1	Wurtzel_et_al	TSS	333492	333492	.	+	.	Name=TSS1208
NC_003210.1	Wurtzel_et_al	TSS	340093	340093	.	+	.	Name=TSS1209
NC_003210.1	Wurtzel_et_al	TSS	34484	34484	.	-	.	Name=TSS1210
NC_003210.1	Wurtzel_et_al	TSS	34595	34595	.	+	.	Name=TSS1211
NC_003210.1	Wurtzel_et_al	TSS	346317	346317	.	+	.	Name=TSS1212
NC_003210.1	Wurtzel_et_al	TSS	348463	348463	.	-	.	Name=TSS1213
NC_003210.1	Wurtzel_et_al	TSS	348568	348568	.	+	.	Name=TSS1214
NC_003210.1	Wurtzel_et_al	TSS	349222	349222	.	+	.	Name=TSS1215
NC_003210.1	Wurtzel_et_al	TSS	351361	351361	.	+	.	Name=TSS1216
NC_003210.1	Wurtzel_et_al	TSS	356552	356552	.	+	.	Name=TSS1217
NC_003210.1	Wurtzel_et_al	TSS	357591	357591	.	+	.	Name=TSS1218
NC_003210.1	Wurtzel_et_al	TSS	360971	360971	.	+	.	Name=TSS1219
NC_003210.1	Wurtzel_et_al	TSS	366465	366465	.	+	.	Name=TSS1220
NC_003210.1	Wurtzel_et_al	TSS	367218	367218	.	+	.	Name=TSS1221
NC_003210.1	Wurtzel_et_al	TSS	368630	368630	.	+	.	Name=TSS1222
NC_003210.1	Wurtzel_et_al	TSS	369106	369106	.	+	.	Name=TSS1223
NC_003210.1	Wurtzel_et_al	TSS	371093	371093	.	-	.	Name=TSS1224
NC_003210.1	Wurtzel_et_al	TSS	378820	378820	.	-	.	Name=TSS1225
NC_003210.1	Wurtzel_et_al	TSS	378924	378924	.	+	.	Name=TSS1226
NC_003210.1	Wurtzel_et_al	TSS	381805	381805	.	-	.	Name=TSS1227
NC_003210.1	Wurtzel_et_al	TSS	381961	381961	.	+	.	Name=TSS1228
NC_003210.1	Wurtzel_et_al	TSS	383659	383659	.	+	.	Name=TSS1229
NC_003210.1	Wurtzel_et_al	TSS	384883	384883	.	+	.	Name=TSS1230
NC_003210.1	Wurtzel_et_al	TSS	386789	386789	.	+	.	Name=TSS1231
NC_003210.1	Wurtzel_et_al	TSS	389759	389759	.	-	.	Name=TSS1232
NC_003210.1	Wurtzel_et_al	TSS	395573	395573	.	+	.	Name=TSS1233
NC_003210.1	Wurtzel_et_al	TSS	396169	396169	.	+	.	Name=TSS1234
NC_003210.1	Wurtzel_et_al	TSS	396936	396936	.	+	.	Name=TSS1235
NC_003210.1	Wurtzel_et_al	TSS	398079	398079	.	-	.	Name=TSS1236
NC_003210.1	Wurtzel_et_al	TSS	401367	401367	.	+	.	Name=TSS1237
NC_003210.1	Wurtzel_et_al	TSS	402595	402595	.	-	.	Name=TSS1238
NC_003210.1	Wurtzel_et_al	TSS	402605	402605	.	+	.	Name=TSS1239
NC_003210.1	Wurtzel_et_al	TSS	40639	40639	.	+	.	Name=TSS1240
NC_003210.1	Wurtzel_et_al	TSS	406585	406585	.	+	.	Name=TSS1241
NC_003210.1	Wurtzel_et_al	TSS	411958	411958	.	+	.	Name=TSS1242
NC_003210.1	Wurtzel_et_al	TSS	412094	412094	.	+	.	Name=TSS1243
NC_003210.1	Wurtzel_et_al	TSS	412423	412423	.	+	.	Name=TSS1244
NC_003210.1	Wurtzel_et_al	TSS	413992	413992	.	-	.	Name=TSS1245
NC_003210.1	Wurtzel_et_al	TSS	414058	414058	.	+	.	Name=TSS1246
NC_003210.1	Wurtzel_et_al	TSS	414897	414897	.	+	.	Name=TSS1247
NC_003210.1	Wurtzel_et_al	TSS	416774	416774	.	+	.	Name=TSS1248
NC_003210.1	Wurtzel_et_al	TSS	418795	418795	.	-	.	Name=TSS1249
NC_003210.1	Wurtzel_et_al	TSS	418869	418869	.	+	.	Name=TSS1250
NC_003210.1	Wurtzel_et_al	TSS	419509	419509	.	+	.	Name=TSS1251
NC_003210.1	Wurtzel_et_al	TSS	426163	426163	.	+	.	Name=TSS1252
NC_003210.1	Wurtzel_et_al	TSS	427071	427071	.	+	.	Name=TSS1253
NC_003210.1	Wurtzel_et_al	TSS	428551	428551	.	+	.	Name=TSS1254
NC_003210.1	Wurtzel_et_al	TSS	435846	435846	.	-	.	Name=TSS1255
NC_003210.1	Wurtzel_et_al	TSS	436132	436132	.	+	.	Name=TSS1256
NC_003210.1	Wurtzel_et_al	TSS	437438	437438	.	+	.	Name=TSS1257
NC_003210.1	Wurtzel_et_al	TSS	438981	438981	.	+	.	Name=TSS1258
NC_003210.1	Wurtzel_et_al	TSS	439999	439999	.	-	.	Name=TSS1259
NC_003210.1	Wurtzel_et_al	TSS	440653	440653	.	-	.	Name=TSS1260
NC_003210.1	Wurtzel_et_al	TSS	440729	440729	.	+	.	Name=TSS1261
NC_003210.1	Wurtzel_et_al	TSS	441667	441667	.	-	.	Name=TSS1262
NC_003210.1	Wurtzel_et_al	TSS	443870	443870	.	-	.	Name=TSS1263
NC_003210.1	Wurtzel_et_al	TSS	444354	444354	.	-	.	Name=TSS1264
NC_003210.1	Wurtzel_et_al	TSS	444918	444918	.	-	.	Name=TSS1265
NC_003210.1	Wurtzel_et_al	TSS	445030	445030	.	+	.	Name=TSS1266
NC_003210.1	Wurtzel_et_al	TSS	447478	447478	.	+	.	Name=TSS1267
NC_003210.1	Wurtzel_et_al	TSS	452461	452461	.	-	.	Name=TSS1268
NC_003210.1	Wurtzel_et_al	TSS	452497	452497	.	+	.	Name=TSS1269
NC_003210.1	Wurtzel_et_al	TSS	45300	45300	.	+	.	Name=TSS1270
NC_003210.1	Wurtzel_et_al	TSS	454324	454324	.	+	.	Name=TSS1271
NC_003210.1	Wurtzel_et_al	TSS	457012	457012	.	+	.	Name=TSS1272
NC_003210.1	Wurtzel_et_al	TSS	4611	4611	.	+	.	Name=TSS1273
NC_003210.1	Wurtzel_et_al	TSS	46126	46126	.	+	.	Name=TSS1274
NC_003210.1	Wurtzel_et_al	TSS	469543	469543	.	+	.	Name=TSS1275
NC_003210.1	Wurtzel_et_al	TSS	471939	471939	.	-	.	Name=TSS1276
NC_003210.1	Wurtzel_et_al	TSS	472187	472187	.	-	.	Name=TSS1277
NC_003210.1	Wurtzel_et_al	TSS	472311	472311	.	+	.	Name=TSS1278
NC_003210.1	Wurtzel_et_al	TSS	472755	472755	.	+	.	Name=TSS1279
NC_003210.1	Wurtzel_et_al	TSS	47300	47300	.	+	.	Name=TSS1280
NC_003210.1	Wurtzel_et_al	TSS	476901	476901	.	+	.	Name=TSS1281
NC_003210.1	Wurtzel_et_al	TSS	48066	48066	.	+	.	Name=TSS1282
NC_003210.1	Wurtzel_et_al	TSS	483139	483139	.	+	.	Name=TSS1283
NC_003210.1	Wurtzel_et_al	TSS	485399	485399	.	-	.	Name=TSS1284
NC_003210.1	Wurtzel_et_al	TSS	48637	48637	.	+	.	Name=TSS1285
NC_003210.1	Wurtzel_et_al	TSS	489801	489801	.	-	.	Name=TSS1286
NC_003210.1	Wurtzel_et_al	TSS	489887	489887	.	+	.	Name=TSS1287
NC_003210.1	Wurtzel_et_al	TSS	491595	491595	.	+	.	Name=TSS1288
NC_003210.1	Wurtzel_et_al	TSS	49453	49453	.	+	.	Name=TSS1289
NC_003210.1	Wurtzel_et_al	TSS	49914	49914	.	+	.	Name=TSS1290
NC_003210.1	Wurtzel_et_al	TSS	502780	502780	.	+	.	Name=TSS1291
NC_003210.1	Wurtzel_et_al	TSS	50483	50483	.	+	.	Name=TSS1292
NC_003210.1	Wurtzel_et_al	TSS	506334	506334	.	+	.	Name=TSS1293
NC_003210.1	Wurtzel_et_al	TSS	506968	506968	.	+	.	Name=TSS1294
NC_003210.1	Wurtzel_et_al	TSS	507544	507544	.	+	.	Name=TSS1295
NC_003210.1	Wurtzel_et_al	TSS	50876	50876	.	+	.	Name=TSS1296
NC_003210.1	Wurtzel_et_al	TSS	509222	509222	.	+	.	Name=TSS1297
NC_003210.1	Wurtzel_et_al	TSS	513287	513287	.	-	.	Name=TSS1298
NC_003210.1	Wurtzel_et_al	TSS	513848	513848	.	+	.	Name=TSS1299
NC_003210.1	Wurtzel_et_al	TSS	514655	514655	.	+	.	Name=TSS1300
NC_003210.1	Wurtzel_et_al	TSS	516050	516050	.	+	.	Name=TSS1301
NC_003210.1	Wurtzel_et_al	TSS	516722	516722	.	+	.	Name=TSS1302
NC_003210.1	Wurtzel_et_al	TSS	51762	51762	.	+	.	Name=TSS1303
NC_003210.1	Wurtzel_et_al	TSS	518564	518564	.	+	.	Name=TSS1304
NC_003210.1	Wurtzel_et_al	TSS	519759	519759	.	+	.	Name=TSS1305
NC_003210.1	Wurtzel_et_al	TSS	520378	520378	.	+	.	Name=TSS1306
NC_003210.1	Wurtzel_et_al	TSS	520927	520927	.	+	.	Name=TSS1307
NC_003210.1	Wurtzel_et_al	TSS	521574	521574	.	+	.	Name=TSS1308
NC_003210.1	Wurtzel_et_al	TSS	521825	521825	.	+	.	Name=TSS1309
NC_003210.1	Wurtzel_et_al	TSS	523642	523642	.	+	.	Name=TSS1310
NC_003210.1	Wurtzel_et_al	TSS	52607	52607	.	+	.	Name=TSS1311
NC_003210.1	Wurtzel_et_al	TSS	526728	526728	.	+	.	Name=TSS1312
NC_003210.1	Wurtzel_et_al	TSS	530486	530486	.	+	.	Name=TSS1313
NC_003210.1	Wurtzel_et_al	TSS	531199	531199	.	+	.	Name=TSS1314
NC_003210.1	Wurtzel_et_al	TSS	536169	536169	.	+	.	Name=TSS1315
NC_003210.1	Wurtzel_et_al	TSS	540769	540769	.	+	.	Name=TSS1316
NC_003210.1	Wurtzel_et_al	TSS	543169	543169	.	+	.	Name=TSS1317
NC_003210.1	Wurtzel_et_al	TSS	544883	544883	.	+	.	Name=TSS1318
NC_003210.1	Wurtzel_et_al	TSS	545583	545583	.	+	.	Name=TSS1319
NC_003210.1	Wurtzel_et_al	TSS	547162	547162	.	-	.	Name=TSS1320
NC_003210.1	Wurtzel_et_al	TSS	54791	54791	.	+	.	Name=TSS1321
NC_003210.1	Wurtzel_et_al	TSS	549409	549409	.	+	.	Name=TSS1322
NC_003210.1	Wurtzel_et_al	TSS	552417	552417	.	-	.	Name=TSS1323
NC_003210.1	Wurtzel_et_al	TSS	552949	552949	.	-	.	Name=TSS1324
NC_003210.1	Wurtzel_et_al	TSS	553040	553040	.	+	.	Name=TSS1325
NC_003210.1	Wurtzel_et_al	TSS	554571	554571	.	+	.	Name=TSS1326
NC_003210.1	Wurtzel_et_al	TSS	557042	557042	.	-	.	Name=TSS1327
NC_003210.1	Wurtzel_et_al	TSS	557162	557162	.	+	.	Name=TSS1328
NC_003210.1	Wurtzel_et_al	TSS	55725	55725	.	+	.	Name=TSS1329
NC_003210.1	Wurtzel_et_al	TSS	558025	558025	.	+	.	Name=TSS1330
NC_003210.1	Wurtzel_et_al	TSS	560253	560253	.	-	.	Name=TSS1331
NC_003210.1	Wurtzel_et_al	TSS	560402	560402	.	+	.	Name=TSS1332
NC_003210.1	Wurtzel_et_al	TSS	562733	562733	.	+	.	Name=TSS1333
NC_003210.1	Wurtzel_et_al	TSS	569978	569978	.	+	.	Name=TSS1334
NC_003210.1	Wurtzel_et_al	TSS	570890	570890	.	+	.	Name=TSS1335
NC_003210.1	Wurtzel_et_al	TSS	573598	573598	.	-	.	Name=TSS1336
NC_003210.1	Wurtzel_et_al	TSS	573697	573697	.	+	.	Name=TSS1337
NC_003210.1	Wurtzel_et_al	TSS	575152	575152	.	+	.	Name=TSS1338
NC_003210.1	Wurtzel_et_al	TSS	578699	578699	.	-	.	Name=TSS1339
NC_003210.1	Wurtzel_et_al	TSS	578860	578860	.	+	.	Name=TSS1340
NC_003210.1	Wurtzel_et_al	TSS	581083	581083	.	-	.	Name=TSS1341
NC_003210.1	Wurtzel_et_al	TSS	586023	586023	.	-	.	Name=TSS1342
NC_003210.1	Wurtzel_et_al	TSS	58835	58835	.	+	.	Name=TSS1343
NC_003210.1	Wurtzel_et_al	TSS	592069	592069	.	-	.	Name=TSS1344
NC_003210.1	Wurtzel_et_al	TSS	592218	592218	.	+	.	Name=TSS1345
NC_003210.1	Wurtzel_et_al	TSS	593447	593447	.	+	.	Name=TSS1346
NC_003210.1	Wurtzel_et_al	TSS	593925	593925	.	+	.	Name=TSS1347
NC_003210.1	Wurtzel_et_al	TSS	595106	595106	.	+	.	Name=TSS1348
NC_003210.1	Wurtzel_et_al	TSS	597649	597649	.	-	.	Name=TSS1349
NC_003210.1	Wurtzel_et_al	TSS	597815	597815	.	+	.	Name=TSS1350
NC_003210.1	Wurtzel_et_al	TSS	600476	600476	.	-	.	Name=TSS1351
NC_003210.1	Wurtzel_et_al	TSS	60463	60463	.	+	.	Name=TSS1352
NC_003210.1	Wurtzel_et_al	TSS	607326	607326	.	+	.	Name=TSS1353
NC_003210.1	Wurtzel_et_al	TSS	607849	607849	.	+	.	Name=TSS1354
NC_003210.1	Wurtzel_et_al	TSS	608233	608233	.	-	.	Name=TSS1355
NC_003210.1	Wurtzel_et_al	TSS	608504	608504	.	-	.	Name=TSS1356
NC_003210.1	Wurtzel_et_al	TSS	611100	611100	.	-	.	Name=TSS1357
NC_003210.1	Wurtzel_et_al	TSS	611216	611216	.	+	.	Name=TSS1358
NC_003210.1	Wurtzel_et_al	TSS	612653	612653	.	+	.	Name=TSS1359
NC_003210.1	Wurtzel_et_al	TSS	616604	616604	.	-	.	Name=TSS1360
NC_003210.1	Wurtzel_et_al	TSS	616703	616703	.	+	.	Name=TSS1361
NC_003210.1	Wurtzel_et_al	TSS	616854	616854	.	+	.	Name=TSS1362
NC_003210.1	Wurtzel_et_al	TSS	616857	616857	.	+	.	Name=TSS1363
NC_003210.1	Wurtzel_et_al	TSS	620456	620456	.	-	.	Name=TSS1364
NC_003210.1	Wurtzel_et_al	TSS	620788	620788	.	+	.	Name=TSS1365
NC_003210.1	Wurtzel_et_al	TSS	623204	623204	.	+	.	Name=TSS1366
NC_003210.1	Wurtzel_et_al	TSS	629058	629058	.	+	.	Name=TSS1367
NC_003210.1	Wurtzel_et_al	TSS	630494	630494	.	+	.	Name=TSS1368
NC_003210.1	Wurtzel_et_al	TSS	633652	633652	.	+	.	Name=TSS1369
NC_003210.1	Wurtzel_et_al	TSS	634434	634434	.	+	.	Name=TSS1370
NC_003210.1	Wurtzel_et_al	TSS	637940	637940	.	-	.	Name=TSS1371
NC_003210.1	Wurtzel_et_al	TSS	638100	638100	.	+	.	Name=TSS1372
NC_003210.1	Wurtzel_et_al	TSS	639512	639512	.	-	.	Name=TSS1373
NC_003210.1	Wurtzel_et_al	TSS	640232	640232	.	+	.	Name=TSS1374
NC_003210.1	Wurtzel_et_al	TSS	642372	642372	.	+	.	Name=TSS1375
NC_003210.1	Wurtzel_et_al	TSS	643366	643366	.	-	.	Name=TSS1376
NC_003210.1	Wurtzel_et_al	TSS	643771	643771	.	-	.	Name=TSS1377
NC_003210.1	Wurtzel_et_al	TSS	643800	643800	.	-	.	Name=TSS1378
NC_003210.1	Wurtzel_et_al	TSS	645261	645261	.	-	.	Name=TSS1379
NC_003210.1	Wurtzel_et_al	TSS	645363	645363	.	+	.	Name=TSS1380
NC_003210.1	Wurtzel_et_al	TSS	649494	649494	.	+	.	Name=TSS1381
NC_003210.1	Wurtzel_et_al	TSS	651656	651656	.	-	.	Name=TSS1382
NC_003210.1	Wurtzel_et_al	TSS	652450	652450	.	-	.	Name=TSS1383
NC_003210.1	Wurtzel_et_al	TSS	652568	652568	.	+	.	Name=TSS1384
NC_003210.1	Wurtzel_et_al	TSS	654059	654059	.	+	.	Name=TSS1385
NC_003210.1	Wurtzel_et_al	TSS	654881	654881	.	-	.	Name=TSS1386
NC_003210.1	Wurtzel_et_al	TSS	657269	657269	.	-	.	Name=TSS1387
NC_003210.1	Wurtzel_et_al	TSS	658492	658492	.	-	.	Name=TSS1388
NC_003210.1	Wurtzel_et_al	TSS	658549	658549	.	+	.	Name=TSS1389
NC_003210.1	Wurtzel_et_al	TSS	659058	659058	.	+	.	Name=TSS1390
NC_003210.1	Wurtzel_et_al	TSS	660381	660381	.	+	.	Name=TSS1391
NC_003210.1	Wurtzel_et_al	TSS	662186	662186	.	-	.	Name=TSS1392
NC_003210.1	Wurtzel_et_al	TSS	663985	663985	.	-	.	Name=TSS1393
NC_003210.1	Wurtzel_et_al	TSS	669062	669062	.	+	.	Name=TSS1394
NC_003210.1	Wurtzel_et_al	TSS	669389	669389	.	+	.	Name=TSS1395
NC_003210.1	Wurtzel_et_al	TSS	677616	677616	.	-	.	Name=TSS1396
NC_003210.1	Wurtzel_et_al	TSS	679724	679724	.	+	.	Name=TSS1397
NC_003210.1	Wurtzel_et_al	TSS	680335	680335	.	+	.	Name=TSS1398
NC_003210.1	Wurtzel_et_al	TSS	681412	681412	.	+	.	Name=TSS1399
NC_003210.1	Wurtzel_et_al	TSS	682695	682695	.	+	.	Name=TSS1400
NC_003210.1	Wurtzel_et_al	TSS	683502	683502	.	+	.	Name=TSS1401
NC_003210.1	Wurtzel_et_al	TSS	684361	684361	.	+	.	Name=TSS1402
NC_003210.1	Wurtzel_et_al	TSS	686954	686954	.	-	.	Name=TSS1403
NC_003210.1	Wurtzel_et_al	TSS	687113	687113	.	+	.	Name=TSS1404
NC_003210.1	Wurtzel_et_al	TSS	688593	688593	.	+	.	Name=TSS1405
NC_003210.1	Wurtzel_et_al	TSS	689529	689529	.	-	.	Name=TSS1406
NC_003210.1	Wurtzel_et_al	TSS	689860	689860	.	-	.	Name=TSS1407
NC_003210.1	Wurtzel_et_al	TSS	689972	689972	.	+	.	Name=TSS1408
NC_003210.1	Wurtzel_et_al	TSS	690595	690595	.	+	.	Name=TSS1409
NC_003210.1	Wurtzel_et_al	TSS	694299	694299	.	+	.	Name=TSS1410
NC_003210.1	Wurtzel_et_al	TSS	696433	696433	.	-	.	Name=TSS1411
NC_003210.1	Wurtzel_et_al	TSS	696575	696575	.	+	.	Name=TSS1412
NC_003210.1	Wurtzel_et_al	TSS	698235	698235	.	-	.	Name=TSS1413
NC_003210.1	Wurtzel_et_al	TSS	698302	698302	.	+	.	Name=TSS1414
NC_003210.1	Wurtzel_et_al	TSS	700478	700478	.	+	.	Name=TSS1415
NC_003210.1	Wurtzel_et_al	TSS	702984	702984	.	-	.	Name=TSS1416
NC_003210.1	Wurtzel_et_al	TSS	703100	703100	.	+	.	Name=TSS1417
NC_003210.1	Wurtzel_et_al	TSS	704423	704423	.	+	.	Name=TSS1418
NC_003210.1	Wurtzel_et_al	TSS	705124	705124	.	+	.	Name=TSS1419
NC_003210.1	Wurtzel_et_al	TSS	705287	705287	.	+	.	Name=TSS1420
NC_003210.1	Wurtzel_et_al	TSS	706268	706268	.	+	.	Name=TSS1421
NC_003210.1	Wurtzel_et_al	TSS	707578	707578	.	+	.	Name=TSS1422
NC_003210.1	Wurtzel_et_al	TSS	707869	707869	.	+	.	Name=TSS1423
NC_003210.1	Wurtzel_et_al	TSS	709104	709104	.	+	.	Name=TSS1424
NC_003210.1	Wurtzel_et_al	TSS	710795	710795	.	-	.	Name=TSS1425
NC_003210.1	Wurtzel_et_al	TSS	712447	712447	.	+	.	Name=TSS1426
NC_003210.1	Wurtzel_et_al	TSS	724848	724848	.	+	.	Name=TSS1427
NC_003210.1	Wurtzel_et_al	TSS	725982	725982	.	+	.	Name=TSS1428
NC_003210.1	Wurtzel_et_al	TSS	73659	73659	.	+	.	Name=TSS1429
NC_003210.1	Wurtzel_et_al	TSS	737221	737221	.	+	.	Name=TSS1430
NC_003210.1	Wurtzel_et_al	TSS	74087	74087	.	+	.	Name=TSS1431
NC_003210.1	Wurtzel_et_al	TSS	749950	749950	.	+	.	Name=TSS1432
NC_003210.1	Wurtzel_et_al	TSS	751476	751476	.	-	.	Name=TSS1433
NC_003210.1	Wurtzel_et_al	TSS	751557	751557	.	+	.	Name=TSS1434
NC_003210.1	Wurtzel_et_al	TSS	753463	753463	.	+	.	Name=TSS1435
NC_003210.1	Wurtzel_et_al	TSS	756315	756315	.	-	.	Name=TSS1436
NC_003210.1	Wurtzel_et_al	TSS	756425	756425	.	+	.	Name=TSS1437
NC_003210.1	Wurtzel_et_al	TSS	756738	756738	.	+	.	Name=TSS1438
NC_003210.1	Wurtzel_et_al	TSS	758636	758636	.	+	.	Name=TSS1439
NC_003210.1	Wurtzel_et_al	TSS	759447	759447	.	+	.	Name=TSS1440
NC_003210.1	Wurtzel_et_al	TSS	760425	760425	.	+	.	Name=TSS1441
NC_003210.1	Wurtzel_et_al	TSS	771715	771715	.	-	.	Name=TSS1442
NC_003210.1	Wurtzel_et_al	TSS	777182	777182	.	+	.	Name=TSS1443
NC_003210.1	Wurtzel_et_al	TSS	77830	77830	.	+	.	Name=TSS1444
NC_003210.1	Wurtzel_et_al	TSS	781067	781067	.	+	.	Name=TSS1445
NC_003210.1	Wurtzel_et_al	TSS	788610	788610	.	+	.	Name=TSS1446
NC_003210.1	Wurtzel_et_al	TSS	797219	797219	.	-	.	Name=TSS1447
NC_003210.1	Wurtzel_et_al	TSS	797329	797329	.	+	.	Name=TSS1448
NC_003210.1	Wurtzel_et_al	TSS	798109	798109	.	+	.	Name=TSS1449
NC_003210.1	Wurtzel_et_al	TSS	799851	799851	.	-	.	Name=TSS1450
NC_003210.1	Wurtzel_et_al	TSS	799931	799931	.	+	.	Name=TSS1451
NC_003210.1	Wurtzel_et_al	TSS	802227	802227	.	-	.	Name=TSS1452
NC_003210.1	Wurtzel_et_al	TSS	802327	802327	.	+	.	Name=TSS1453
NC_003210.1	Wurtzel_et_al	TSS	803123	803123	.	+	.	Name=TSS1454
NC_003210.1	Wurtzel_et_al	TSS	804249	804249	.	-	.	Name=TSS1455
NC_003210.1	Wurtzel_et_al	TSS	807287	807287	.	-	.	Name=TSS1456
NC_003210.1	Wurtzel_et_al	TSS	807886	807886	.	-	.	Name=TSS1457
NC_003210.1	Wurtzel_et_al	TSS	810955	810955	.	+	.	Name=TSS1458
NC_003210.1	Wurtzel_et_al	TSS	811739	811739	.	+	.	Name=TSS1459
NC_003210.1	Wurtzel_et_al	TSS	813305	813305	.	+	.	Name=TSS1460
NC_003210.1	Wurtzel_et_al	TSS	81548	81548	.	-	.	Name=TSS1461
NC_003210.1	Wurtzel_et_al	TSS	81629	81629	.	+	.	Name=TSS1462
NC_003210.1	Wurtzel_et_al	TSS	819325	819325	.	-	.	Name=TSS1463
NC_003210.1	Wurtzel_et_al	TSS	819360	819360	.	+	.	Name=TSS1464
NC_003210.1	Wurtzel_et_al	TSS	820120	820120	.	+	.	Name=TSS1465
NC_003210.1	Wurtzel_et_al	TSS	821796	821796	.	-	.	Name=TSS1466
NC_003210.1	Wurtzel_et_al	TSS	822573	822573	.	-	.	Name=TSS1467
NC_003210.1	Wurtzel_et_al	TSS	823560	823560	.	-	.	Name=TSS1468
NC_003210.1	Wurtzel_et_al	TSS	824207	824207	.	-	.	Name=TSS1469
NC_003210.1	Wurtzel_et_al	TSS	824407	824407	.	+	.	Name=TSS1470
NC_003210.1	Wurtzel_et_al	TSS	826710	826710	.	-	.	Name=TSS1471
NC_003210.1	Wurtzel_et_al	TSS	82705	82705	.	+	.	Name=TSS1472
NC_003210.1	Wurtzel_et_al	TSS	827541	827541	.	-	.	Name=TSS1473
NC_003210.1	Wurtzel_et_al	TSS	827652	827652	.	+	.	Name=TSS1474
NC_003210.1	Wurtzel_et_al	TSS	830228	830228	.	+	.	Name=TSS1475
NC_003210.1	Wurtzel_et_al	TSS	830998	830998	.	+	.	Name=TSS1476
NC_003210.1	Wurtzel_et_al	TSS	834105	834105	.	-	.	Name=TSS1477
NC_003210.1	Wurtzel_et_al	TSS	83662	83662	.	+	.	Name=TSS1478
NC_003210.1	Wurtzel_et_al	TSS	838720	838720	.	+	.	Name=TSS1479
NC_003210.1	Wurtzel_et_al	TSS	838843	838843	.	+	.	Name=TSS1480
NC_003210.1	Wurtzel_et_al	TSS	839493	839493	.	+	.	Name=TSS1481
NC_003210.1	Wurtzel_et_al	TSS	840166	840166	.	+	.	Name=TSS1482
NC_003210.1	Wurtzel_et_al	TSS	841125	841125	.	+	.	Name=TSS1483
NC_003210.1	Wurtzel_et_al	TSS	842275	842275	.	+	.	Name=TSS1484
NC_003210.1	Wurtzel_et_al	TSS	843748	843748	.	-	.	Name=TSS1485
NC_003210.1	Wurtzel_et_al	TSS	845547	845547	.	+	.	Name=TSS1486
NC_003210.1	Wurtzel_et_al	TSS	847526	847526	.	+	.	Name=TSS1487
NC_003210.1	Wurtzel_et_al	TSS	849288	849288	.	+	.	Name=TSS1488
NC_003210.1	Wurtzel_et_al	TSS	852664	852664	.	+	.	Name=TSS1489
NC_003210.1	Wurtzel_et_al	TSS	854428	854428	.	+	.	Name=TSS1490
NC_003210.1	Wurtzel_et_al	TSS	855467	855467	.	+	.	Name=TSS1491
NC_003210.1	Wurtzel_et_al	TSS	855722	855722	.	+	.	Name=TSS1492
NC_003210.1	Wurtzel_et_al	TSS	85920	85920	.	+	.	Name=TSS1493
NC_003210.1	Wurtzel_et_al	TSS	861644	861644	.	-	.	Name=TSS1494
NC_003210.1	Wurtzel_et_al	TSS	867026	867026	.	-	.	Name=TSS1495
NC_003210.1	Wurtzel_et_al	TSS	868950	868950	.	+	.	Name=TSS1496
NC_003210.1	Wurtzel_et_al	TSS	872436	872436	.	-	.	Name=TSS1497
NC_003210.1	Wurtzel_et_al	TSS	872588	872588	.	+	.	Name=TSS1498
NC_003210.1	Wurtzel_et_al	TSS	87782	87782	.	-	.	Name=TSS1499
NC_003210.1	Wurtzel_et_al	TSS	882292	882292	.	-	.	Name=TSS1500
NC_003210.1	Wurtzel_et_al	TSS	882302	882302	.	+	.	Name=TSS1501
NC_003210.1	Wurtzel_et_al	TSS	882759	882759	.	+	.	Name=TSS1502
NC_003210.1	Wurtzel_et_al	TSS	883991	883991	.	+	.	Name=TSS1503
NC_003210.1	Wurtzel_et_al	TSS	884150	884150	.	+	.	Name=TSS1504
NC_003210.1	Wurtzel_et_al	TSS	885371	885371	.	+	.	Name=TSS1505
NC_003210.1	Wurtzel_et_al	TSS	889995	889995	.	+	.	Name=TSS1506
NC_003210.1	Wurtzel_et_al	TSS	890392	890392	.	+	.	Name=TSS1507
NC_003210.1	Wurtzel_et_al	TSS	891250	891250	.	+	.	Name=TSS1508
NC_003210.1	Wurtzel_et_al	TSS	892638	892638	.	+	.	Name=TSS1509
NC_003210.1	Wurtzel_et_al	TSS	895210	895210	.	+	.	Name=TSS1510
NC_003210.1	Wurtzel_et_al	TSS	897053	897053	.	-	.	Name=TSS1511
NC_003210.1	Wurtzel_et_al	TSS	897222	897222	.	+	.	Name=TSS1512
NC_003210.1	Wurtzel_et_al	TSS	907913	907913	.	+	.	Name=TSS1513
NC_003210.1	Wurtzel_et_al	TSS	909145	909145	.	+	.	Name=TSS1514
NC_003210.1	Wurtzel_et_al	TSS	910944	910944	.	-	.	Name=TSS1515
NC_003210.1	Wurtzel_et_al	TSS	918993	918993	.	+	.	Name=TSS1516
NC_003210.1	Wurtzel_et_al	TSS	921040	921040	.	+	.	Name=TSS1517
NC_003210.1	Wurtzel_et_al	TSS	923124	923124	.	+	.	Name=TSS1518
NC_003210.1	Wurtzel_et_al	TSS	926193	926193	.	+	.	Name=TSS1519
NC_003210.1	Wurtzel_et_al	TSS	926280	926280	.	+	.	Name=TSS1520
NC_003210.1	Wurtzel_et_al	TSS	927079	927079	.	+	.	Name=TSS1521
NC_003210.1	Wurtzel_et_al	TSS	928738	928738	.	+	.	Name=TSS1522
NC_003210.1	Wurtzel_et_al	TSS	929863	929863	.	+	.	Name=TSS1523
NC_003210.1	Wurtzel_et_al	TSS	931149	931149	.	+	.	Name=TSS1524
NC_003210.1	Wurtzel_et_al	TSS	932139	932139	.	+	.	Name=TSS1525
NC_003210.1	Wurtzel_et_al	TSS	933931	933931	.	+	.	Name=TSS1526
NC_003210.1	Wurtzel_et_al	TSS	936645	936645	.	+	.	Name=TSS1527
NC_003210.1	Wurtzel_et_al	TSS	936729	936729	.	+	.	Name=TSS1528
NC_003210.1	Wurtzel_et_al	TSS	937176	937176	.	+	.	Name=TSS1529
NC_003210.1	Wurtzel_et_al	TSS	939062	939062	.	+	.	Name=TSS1530
NC_003210.1	Wurtzel_et_al	TSS	940017	940017	.	+	.	Name=TSS1531
NC_003210.1	Wurtzel_et_al	TSS	940116	940116	.	+	.	Name=TSS1532
NC_003210.1	Wurtzel_et_al	TSS	940274	940274	.	+	.	Name=TSS1533
NC_003210.1	Wurtzel_et_al	TSS	940783	940783	.	+	.	Name=TSS1534
NC_003210.1	Wurtzel_et_al	TSS	941565	941565	.	+	.	Name=TSS1535
NC_003210.1	Wurtzel_et_al	TSS	942065	942065	.	+	.	Name=TSS1536
NC_003210.1	Wurtzel_et_al	TSS	943497	943497	.	+	.	Name=TSS1537
NC_003210.1	Wurtzel_et_al	TSS	945410	945410	.	-	.	Name=TSS1538
NC_003210.1	Wurtzel_et_al	TSS	945496	945496	.	+	.	Name=TSS1539
NC_003210.1	Wurtzel_et_al	TSS	947047	947047	.	+	.	Name=TSS1540
NC_003210.1	Wurtzel_et_al	TSS	947102	947102	.	+	.	Name=TSS1541
NC_003210.1	Wurtzel_et_al	TSS	947678	947678	.	+	.	Name=TSS1542
NC_003210.1	Wurtzel_et_al	TSS	948706	948706	.	+	.	Name=TSS1543
NC_003210.1	Wurtzel_et_al	TSS	950338	950338	.	+	.	Name=TSS1544
NC_003210.1	Wurtzel_et_al	TSS	957691	957691	.	+	.	Name=TSS1545
NC_003210.1	Wurtzel_et_al	TSS	959665	959665	.	+	.	Name=TSS1546
NC_003210.1	Wurtzel_et_al	TSS	960712	960712	.	+	.	Name=TSS1547
NC_003210.1	Wurtzel_et_al	TSS	965360	965360	.	-	.	Name=TSS1548
NC_003210.1	Wurtzel_et_al	TSS	966227	966227	.	+	.	Name=TSS1549
NC_003210.1	Wurtzel_et_al	TSS	966999	966999	.	+	.	Name=TSS1550
NC_003210.1	Wurtzel_et_al	TSS	969454	969454	.	-	.	Name=TSS1551
NC_003210.1	Wurtzel_et_al	TSS	970656	970656	.	-	.	Name=TSS1552
NC_003210.1	Wurtzel_et_al	TSS	970867	970867	.	+	.	Name=TSS1553
NC_003210.1	Wurtzel_et_al	TSS	970975	970975	.	+	.	Name=TSS1554
NC_003210.1	Wurtzel_et_al	TSS	972184	972184	.	+	.	Name=TSS1555
NC_003210.1	Wurtzel_et_al	TSS	973704	973704	.	-	.	Name=TSS1556
NC_003210.1	Wurtzel_et_al	TSS	974989	974989	.	-	.	Name=TSS1557
NC_003210.1	Wurtzel_et_al	TSS	978885	978885	.	-	.	Name=TSS1558
NC_003210.1	Wurtzel_et_al	TSS	979023	979023	.	+	.	Name=TSS1559
NC_003210.1	Wurtzel_et_al	TSS	979722	979722	.	+	.	Name=TSS1560
NC_003210.1	Wurtzel_et_al	TSS	980160	980160	.	+	.	Name=TSS1561
NC_003210.1	Wurtzel_et_al	TSS	981486	981486	.	+	.	Name=TSS1562
NC_003210.1	Wurtzel_et_al	TSS	983679	983679	.	-	.	Name=TSS1563
NC_003210.1	Wurtzel_et_al	TSS	983748	983748	.	+	.	Name=TSS1564
NC_003210.1	Wurtzel_et_al	TSS	986592	986592	.	-	.	Name=TSS1565
NC_003210.1	Wurtzel_et_al	TSS	986694	986694	.	+	.	Name=TSS1566
NC_003210.1	Wurtzel_et_al	TSS	987250	987250	.	+	.	Name=TSS1567
NC_003210.1	Wurtzel_et_al	TSS	987604	987604	.	+	.	Name=TSS1568
NC_003210.1	Wurtzel_et_al	TSS	989027	989027	.	+	.	Name=TSS1569
NC_003210.1	Wurtzel_et_al	TSS	991781	991781	.	+	.	Name=TSS1570
NC_003210.1	Wurtzel_et_al	TSS	992947	992947	.	+	.	Name=TSS1571
NC_003210.1	Wurtzel_et_al	TSS	995131	995131	.	+	.	Name=TSS1572
NC_003210.1	Wurtzel_et_al	TSS	997682	997682	.	-	.	Name=TSS1573
NC_003210.1	Wurtzel_et_al	TSS	998898	998898	.	-	.	Name=TSS1574
NC_003210.1	Wurtzel_et_al	TSS	998978	998978	.	+	.	Name=TSS1575
NC_003210.1	Wurtzel_et_al	TSS	999143	999143	.	+	.	Name=TSS1576

## Sheet: EGD-e_Lifted_mapped
EGD-e TSS positions lifted to RO15 genome
Positions (start,end) in RO15 genome
##gff-version3
seqid	source	type	start	end	score	strand	phase	attributes
CADEHJ010000001.1	CrossMap	TSS	1034370	1034370	.	+	.	Name=TSS1
CADEHJ010000001.1	CrossMap	TSS	1035428	1035428	.	+	.	Name=TSS2
CADEHJ010000001.1	CrossMap	TSS	1037570	1037570	.	-	.	Name=TSS3
CADEHJ010000001.1	CrossMap	TSS	1040771	1040771	.	-	.	Name=TSS4
CADEHJ010000001.1	CrossMap	TSS	1040878	1040878	.	+	.	Name=TSS5
CADEHJ010000001.1	CrossMap	TSS	1041765	1041765	.	-	.	Name=TSS6
CADEHJ010000001.1	CrossMap	TSS	1042898	1042898	.	-	.	Name=TSS7
CADEHJ010000001.1	CrossMap	TSS	1043019	1043019	.	+	.	Name=TSS8
CADEHJ010000001.1	CrossMap	TSS	1044198	1044198	.	+	.	Name=TSS9
CADEHJ010000001.1	CrossMap	TSS	1047317	1047317	.	-	.	Name=TSS10
CADEHJ010000001.1	CrossMap	TSS	1047407	1047407	.	+	.	Name=TSS11
CADEHJ010000001.1	CrossMap	TSS	1049097	1049097	.	+	.	Name=TSS12
CADEHJ010000001.1	CrossMap	TSS	1051803	1051803	.	+	.	Name=TSS13
CADEHJ010000001.1	CrossMap	TSS	1053479	1053479	.	+	.	Name=TSS14
CADEHJ010000001.1	CrossMap	TSS	1055404	1055404	.	+	.	Name=TSS15
CADEHJ010000001.1	CrossMap	TSS	1056483	1056483	.	+	.	Name=TSS16
CADEHJ010000001.1	CrossMap	TSS	1059118	1059118	.	-	.	Name=TSS17
CADEHJ010000001.1	CrossMap	TSS	1060312	1060312	.	+	.	Name=TSS18
CADEHJ010000001.1	CrossMap	TSS	1063073	1063073	.	-	.	Name=TSS19
CADEHJ010000001.1	CrossMap	TSS	1063815	1063815	.	-	.	Name=TSS20
CADEHJ010000001.1	CrossMap	TSS	1063911	1063911	.	+	.	Name=TSS21
CADEHJ010000001.1	CrossMap	TSS	108319	108319	.	+	.	Name=TSS22
CADEHJ010000001.1	CrossMap	TSS	1066216	1066216	.	-	.	Name=TSS23
CADEHJ010000001.1	CrossMap	TSS	1066591	1066591	.	-	.	Name=TSS24
CADEHJ010000001.1	CrossMap	TSS	1066809	1066809	.	+	.	Name=TSS25
CADEHJ010000001.1	CrossMap	TSS	1070224	1070224	.	+	.	Name=TSS26
CADEHJ010000001.1	CrossMap	TSS	1073508	1073508	.	+	.	Name=TSS27
CADEHJ010000001.1	CrossMap	TSS	1073967	1073967	.	+	.	Name=TSS28
CADEHJ010000001.1	CrossMap	TSS	1074451	1074451	.	+	.	Name=TSS29
CADEHJ010000001.1	CrossMap	TSS	1075875	1075875	.	+	.	Name=TSS30
CADEHJ010000001.1	CrossMap	TSS	109275	109275	.	+	.	Name=TSS31
CADEHJ010000001.1	CrossMap	TSS	1078746	1078746	.	-	.	Name=TSS32
CADEHJ010000001.1	CrossMap	TSS	1078970	1078970	.	+	.	Name=TSS33
CADEHJ010000001.1	CrossMap	TSS	1082088	1082088	.	+	.	Name=TSS34
CADEHJ010000001.1	CrossMap	TSS	1082693	1082693	.	+	.	Name=TSS35
CADEHJ010000001.1	CrossMap	TSS	1085576	1085576	.	+	.	Name=TSS36
CADEHJ010000001.1	CrossMap	TSS	1087009	1087009	.	+	.	Name=TSS37
CADEHJ010000001.1	CrossMap	TSS	1087703	1087703	.	+	.	Name=TSS38
CADEHJ010000001.1	CrossMap	TSS	1092579	1092579	.	-	.	Name=TSS39
CADEHJ010000001.1	CrossMap	TSS	1092950	1092950	.	+	.	Name=TSS40
CADEHJ010000001.1	CrossMap	TSS	1094870	1094870	.	-	.	Name=TSS41
CADEHJ010000001.1	CrossMap	TSS	112120	112120	.	+	.	Name=TSS42
CADEHJ010000001.1	CrossMap	TSS	10380	10380	.	+	.	Name=TSS43
CADEHJ010000001.1	CrossMap	TSS	1105750	1105750	.	-	.	Name=TSS44
CADEHJ010000001.1	CrossMap	TSS	1105806	1105806	.	+	.	Name=TSS45
CADEHJ010000001.1	CrossMap	TSS	1106650	1106650	.	+	.	Name=TSS46
CADEHJ010000001.1	CrossMap	TSS	112643	112643	.	+	.	Name=TSS47
CADEHJ010000001.1	CrossMap	TSS	1112106	1112106	.	-	.	Name=TSS48
CADEHJ010000001.1	CrossMap	TSS	1112195	1112195	.	+	.	Name=TSS49
CADEHJ010000001.1	CrossMap	TSS	1113405	1113405	.	-	.	Name=TSS50
CADEHJ010000001.1	CrossMap	TSS	1113973	1113973	.	+	.	Name=TSS51
CADEHJ010000001.1	CrossMap	TSS	1116316	1116316	.	+	.	Name=TSS52
CADEHJ010000001.1	CrossMap	TSS	113373	113373	.	-	.	Name=TSS53
CADEHJ010000001.1	CrossMap	TSS	1119590	1119590	.	+	.	Name=TSS54
CADEHJ010000001.1	CrossMap	TSS	1120045	1120045	.	+	.	Name=TSS55
CADEHJ010000001.1	CrossMap	TSS	1121974	1121974	.	+	.	Name=TSS56
CADEHJ010000001.1	CrossMap	TSS	1127434	1127434	.	-	.	Name=TSS57
CADEHJ010000001.1	CrossMap	TSS	1128115	1128115	.	-	.	Name=TSS58
CADEHJ010000001.1	CrossMap	TSS	1128193	1128193	.	+	.	Name=TSS59
CADEHJ010000001.1	CrossMap	TSS	114489	114489	.	+	.	Name=TSS60
CADEHJ010000001.1	CrossMap	TSS	1129074	1129074	.	+	.	Name=TSS61
CADEHJ010000001.1	CrossMap	TSS	1131171	1131171	.	+	.	Name=TSS62
CADEHJ010000001.1	CrossMap	TSS	1132350	1132350	.	-	.	Name=TSS63
CADEHJ010000001.1	CrossMap	TSS	1132458	1132458	.	+	.	Name=TSS64
CADEHJ010000001.1	CrossMap	TSS	1132956	1132956	.	+	.	Name=TSS65
CADEHJ010000001.1	CrossMap	TSS	115034	115034	.	+	.	Name=TSS66
CADEHJ010000001.1	CrossMap	TSS	1134366	1134366	.	+	.	Name=TSS67
CADEHJ010000001.1	CrossMap	TSS	115301	115301	.	+	.	Name=TSS68
CADEHJ010000001.1	CrossMap	TSS	1137016	1137016	.	+	.	Name=TSS69
CADEHJ010000001.1	CrossMap	TSS	1137366	1137366	.	+	.	Name=TSS70
CADEHJ010000001.1	CrossMap	TSS	1141224	1141224	.	+	.	Name=TSS71
CADEHJ010000001.1	CrossMap	TSS	1145818	1145818	.	-	.	Name=TSS72
CADEHJ010000001.1	CrossMap	TSS	1145960	1145960	.	+	.	Name=TSS73
CADEHJ010000001.1	CrossMap	TSS	1147234	1147234	.	+	.	Name=TSS74
CADEHJ010000001.1	CrossMap	TSS	1148952	1148952	.	+	.	Name=TSS75
CADEHJ010000001.1	CrossMap	TSS	1154209	1154209	.	+	.	Name=TSS76
CADEHJ010000001.1	CrossMap	TSS	1156281	1156281	.	+	.	Name=TSS77
CADEHJ010000001.1	CrossMap	TSS	117529	117529	.	+	.	Name=TSS78
CADEHJ010000001.1	CrossMap	TSS	1161872	1161872	.	+	.	Name=TSS79
CADEHJ010000001.1	CrossMap	TSS	1163146	1163146	.	+	.	Name=TSS80
CADEHJ010000001.1	CrossMap	TSS	1165114	1165114	.	+	.	Name=TSS81
CADEHJ010000001.1	CrossMap	TSS	1165469	1165469	.	+	.	Name=TSS82
CADEHJ010000001.1	CrossMap	TSS	1173044	1173044	.	+	.	Name=TSS88
CADEHJ010000001.1	CrossMap	TSS	1177044	1177044	.	+	.	Name=TSS89
CADEHJ010000001.1	CrossMap	TSS	1180916	1180916	.	+	.	Name=TSS90
CADEHJ010000001.1	CrossMap	TSS	122108	122108	.	+	.	Name=TSS91
CADEHJ010000001.1	CrossMap	TSS	1185606	1185606	.	-	.	Name=TSS92
CADEHJ010000001.1	CrossMap	TSS	1186538	1186538	.	+	.	Name=TSS93
CADEHJ010000001.1	CrossMap	TSS	1187134	1187134	.	+	.	Name=TSS94
CADEHJ010000001.1	CrossMap	TSS	1189190	1189190	.	+	.	Name=TSS95
CADEHJ010000001.1	CrossMap	TSS	1193992	1193992	.	-	.	Name=TSS96
CADEHJ010000001.1	CrossMap	TSS	124215	124215	.	+	.	Name=TSS97
CADEHJ010000001.1	CrossMap	TSS	1208902	1208902	.	+	.	Name=TSS98
CADEHJ010000001.1	CrossMap	TSS	126322	126322	.	-	.	Name=TSS99
CADEHJ010000001.1	CrossMap	TSS	1226900	1226900	.	+	.	Name=TSS100
CADEHJ010000001.1	CrossMap	TSS	126641	126641	.	-	.	Name=TSS101
CADEHJ010000001.1	CrossMap	TSS	126740	126740	.	+	.	Name=TSS102
CADEHJ010000001.1	CrossMap	TSS	1228621	1228621	.	-	.	Name=TSS103
CADEHJ010000001.1	CrossMap	TSS	127747	127747	.	+	.	Name=TSS104
CADEHJ010000001.1	CrossMap	TSS	1244081	1244081	.	+	.	Name=TSS105
CADEHJ010000001.1	CrossMap	TSS	128366	128366	.	+	.	Name=TSS106
CADEHJ010000001.1	CrossMap	TSS	1246288	1246288	.	-	.	Name=TSS107
CADEHJ010000001.1	CrossMap	TSS	1246314	1246314	.	-	.	Name=TSS108
CADEHJ010000001.1	CrossMap	TSS	1246756	1246756	.	-	.	Name=TSS109
CADEHJ010000001.1	CrossMap	TSS	1247353	1247353	.	+	.	Name=TSS110
CADEHJ010000001.1	CrossMap	TSS	1248550	1248550	.	+	.	Name=TSS111
CADEHJ010000001.1	CrossMap	TSS	1250824	1250824	.	+	.	Name=TSS112
CADEHJ010000001.1	CrossMap	TSS	1251950	1251950	.	+	.	Name=TSS113
CADEHJ010000001.1	CrossMap	TSS	1253145	1253145	.	-	.	Name=TSS114
CADEHJ010000001.1	CrossMap	TSS	1253260	1253260	.	+	.	Name=TSS115
CADEHJ010000001.1	CrossMap	TSS	1253679	1253679	.	+	.	Name=TSS116
CADEHJ010000001.1	CrossMap	TSS	1257556	1257556	.	+	.	Name=TSS117
CADEHJ010000001.1	CrossMap	TSS	1261786	1261786	.	+	.	Name=TSS118
CADEHJ010000001.1	CrossMap	TSS	1265554	1265554	.	+	.	Name=TSS119
CADEHJ010000001.1	CrossMap	TSS	1267240	1267240	.	-	.	Name=TSS120
CADEHJ010000001.1	CrossMap	TSS	1267334	1267334	.	+	.	Name=TSS121
CADEHJ010000001.1	CrossMap	TSS	1272417	1272417	.	+	.	Name=TSS122
CADEHJ010000001.1	CrossMap	TSS	1274794	1274794	.	+	.	Name=TSS123
CADEHJ010000001.1	CrossMap	TSS	1276392	1276392	.	-	.	Name=TSS124
CADEHJ010000001.1	CrossMap	TSS	1276578	1276578	.	-	.	Name=TSS125
CADEHJ010000001.1	CrossMap	TSS	1276699	1276699	.	+	.	Name=TSS126
CADEHJ010000001.1	CrossMap	TSS	1278955	1278955	.	+	.	Name=TSS127
CADEHJ010000001.1	CrossMap	TSS	1279590	1279590	.	+	.	Name=TSS128
CADEHJ010000001.1	CrossMap	TSS	1279995	1279995	.	+	.	Name=TSS129
CADEHJ010000001.1	CrossMap	TSS	1282072	1282072	.	-	.	Name=TSS130
CADEHJ010000001.1	CrossMap	TSS	1282631	1282631	.	-	.	Name=TSS131
CADEHJ010000001.1	CrossMap	TSS	1282723	1282723	.	+	.	Name=TSS132
CADEHJ010000001.1	CrossMap	TSS	1283746	1283746	.	+	.	Name=TSS133
CADEHJ010000001.1	CrossMap	TSS	1285604	1285604	.	+	.	Name=TSS134
CADEHJ010000001.1	CrossMap	TSS	1287749	1287749	.	+	.	Name=TSS135
CADEHJ010000001.1	CrossMap	TSS	1289749	1289749	.	-	.	Name=TSS136
CADEHJ010000001.1	CrossMap	TSS	1290761	1290761	.	+	.	Name=TSS137
CADEHJ010000001.1	CrossMap	TSS	1292743	1292743	.	-	.	Name=TSS138
CADEHJ010000001.1	CrossMap	TSS	1294160	1294160	.	-	.	Name=TSS139
CADEHJ010000001.1	CrossMap	TSS	1294222	1294222	.	+	.	Name=TSS140
CADEHJ010000001.1	CrossMap	TSS	1295219	1295219	.	-	.	Name=TSS141
CADEHJ010000001.1	CrossMap	TSS	1295368	1295368	.	+	.	Name=TSS142
CADEHJ010000001.1	CrossMap	TSS	1297623	1297623	.	-	.	Name=TSS143
CADEHJ010000001.1	CrossMap	TSS	1298421	1298421	.	-	.	Name=TSS144
CADEHJ010000001.1	CrossMap	TSS	1299712	1299712	.	-	.	Name=TSS145
CADEHJ010000001.1	CrossMap	TSS	1300171	1300171	.	-	.	Name=TSS146
CADEHJ010000001.1	CrossMap	TSS	1300270	1300270	.	+	.	Name=TSS147
CADEHJ010000001.1	CrossMap	TSS	12558	12558	.	+	.	Name=TSS148
CADEHJ010000001.1	CrossMap	TSS	1302077	1302077	.	+	.	Name=TSS149
CADEHJ010000001.1	CrossMap	TSS	1303104	1303104	.	+	.	Name=TSS150
CADEHJ010000001.1	CrossMap	TSS	1304579	1304579	.	+	.	Name=TSS151
CADEHJ010000001.1	CrossMap	TSS	1305990	1305990	.	+	.	Name=TSS152
CADEHJ010000001.1	CrossMap	TSS	1307259	1307259	.	+	.	Name=TSS153
CADEHJ010000001.1	CrossMap	TSS	1310634	1310634	.	+	.	Name=TSS154
CADEHJ010000001.1	CrossMap	TSS	1312956	1312956	.	+	.	Name=TSS155
CADEHJ010000001.1	CrossMap	TSS	1314460	1314460	.	+	.	Name=TSS156
CADEHJ010000001.1	CrossMap	TSS	1315841	1315841	.	+	.	Name=TSS157
CADEHJ010000001.1	CrossMap	TSS	1316913	1316913	.	+	.	Name=TSS158
CADEHJ010000001.1	CrossMap	TSS	1318237	1318237	.	+	.	Name=TSS159
CADEHJ010000001.1	CrossMap	TSS	1320025	1320025	.	-	.	Name=TSS160
CADEHJ010000001.1	CrossMap	TSS	1320567	1320567	.	-	.	Name=TSS161
CADEHJ010000001.1	CrossMap	TSS	1320666	1320666	.	+	.	Name=TSS162
CADEHJ010000001.1	CrossMap	TSS	1321215	1321215	.	+	.	Name=TSS163
CADEHJ010000001.1	CrossMap	TSS	1325764	1325764	.	+	.	Name=TSS164
CADEHJ010000001.1	CrossMap	TSS	1332421	1332421	.	-	.	Name=TSS165
CADEHJ010000001.1	CrossMap	TSS	1332528	1332528	.	+	.	Name=TSS166
CADEHJ010000001.1	CrossMap	TSS	1335266	1335266	.	+	.	Name=TSS167
CADEHJ010000001.1	CrossMap	TSS	1336248	1336248	.	+	.	Name=TSS168
CADEHJ010000001.1	CrossMap	TSS	1336648	1336648	.	+	.	Name=TSS169
CADEHJ010000001.1	CrossMap	TSS	1339278	1339278	.	+	.	Name=TSS170
CADEHJ010000001.1	CrossMap	TSS	1341193	1341193	.	+	.	Name=TSS171
CADEHJ010000001.1	CrossMap	TSS	1343771	1343771	.	-	.	Name=TSS172
CADEHJ010000001.1	CrossMap	TSS	1343858	1343858	.	+	.	Name=TSS173
CADEHJ010000001.1	CrossMap	TSS	1344260	1344260	.	+	.	Name=TSS174
CADEHJ010000001.1	CrossMap	TSS	1344657	1344657	.	+	.	Name=TSS175
CADEHJ010000001.1	CrossMap	TSS	1346874	1346874	.	+	.	Name=TSS176
CADEHJ010000001.1	CrossMap	TSS	1349121	1349121	.	-	.	Name=TSS177
CADEHJ010000001.1	CrossMap	TSS	138997	138997	.	-	.	Name=TSS178
CADEHJ010000001.1	CrossMap	TSS	139078	139078	.	+	.	Name=TSS179
CADEHJ010000001.1	CrossMap	TSS	1352416	1352416	.	+	.	Name=TSS180
CADEHJ010000001.1	CrossMap	TSS	1353945	1353945	.	+	.	Name=TSS181
CADEHJ010000001.1	CrossMap	TSS	1359804	1359804	.	+	.	Name=TSS182
CADEHJ010000001.1	CrossMap	TSS	1364211	1364211	.	+	.	Name=TSS183
CADEHJ010000001.1	CrossMap	TSS	1369191	1369191	.	+	.	Name=TSS184
CADEHJ010000001.1	CrossMap	TSS	1370597	1370597	.	+	.	Name=TSS185
CADEHJ010000001.1	CrossMap	TSS	1371623	1371623	.	+	.	Name=TSS186
CADEHJ010000001.1	CrossMap	TSS	1372124	1372124	.	+	.	Name=TSS187
CADEHJ010000001.1	CrossMap	TSS	1375584	1375584	.	-	.	Name=TSS188
CADEHJ010000001.1	CrossMap	TSS	1376139	1376139	.	-	.	Name=TSS189
CADEHJ010000001.1	CrossMap	TSS	141500	141500	.	-	.	Name=TSS190
CADEHJ010000001.1	CrossMap	TSS	1376535	1376535	.	-	.	Name=TSS191
CADEHJ010000001.1	CrossMap	TSS	1376656	1376656	.	+	.	Name=TSS192
CADEHJ010000001.1	CrossMap	TSS	141606	141606	.	+	.	Name=TSS193
CADEHJ010000001.1	CrossMap	TSS	1377515	1377515	.	+	.	Name=TSS194
CADEHJ010000001.1	CrossMap	TSS	1379331	1379331	.	+	.	Name=TSS195
CADEHJ010000001.1	CrossMap	TSS	141878	141878	.	+	.	Name=TSS196
CADEHJ010000001.1	CrossMap	TSS	1380411	1380411	.	+	.	Name=TSS197
CADEHJ010000001.1	CrossMap	TSS	142268	142268	.	+	.	Name=TSS198
CADEHJ010000001.1	CrossMap	TSS	1385684	1385684	.	+	.	Name=TSS199
CADEHJ010000001.1	CrossMap	TSS	1390269	1390269	.	-	.	Name=TSS200
CADEHJ010000001.1	CrossMap	TSS	1391562	1391562	.	-	.	Name=TSS201
CADEHJ010000001.1	CrossMap	TSS	1391653	1391653	.	+	.	Name=TSS202
CADEHJ010000001.1	CrossMap	TSS	1392818	1392818	.	+	.	Name=TSS203
CADEHJ010000001.1	CrossMap	TSS	1393539	1393539	.	+	.	Name=TSS204
CADEHJ010000001.1	CrossMap	TSS	1394075	1394075	.	+	.	Name=TSS205
CADEHJ010000001.1	CrossMap	TSS	1395875	1395875	.	+	.	Name=TSS206
CADEHJ010000001.1	CrossMap	TSS	1399778	1399778	.	+	.	Name=TSS207
CADEHJ010000001.1	CrossMap	TSS	1400201	1400201	.	+	.	Name=TSS208
CADEHJ010000001.1	CrossMap	TSS	1403069	1403069	.	+	.	Name=TSS209
CADEHJ010000001.1	CrossMap	TSS	1405310	1405310	.	+	.	Name=TSS210
CADEHJ010000001.1	CrossMap	TSS	1410604	1410604	.	+	.	Name=TSS211
CADEHJ010000001.1	CrossMap	TSS	1413735	1413735	.	+	.	Name=TSS212
CADEHJ010000001.1	CrossMap	TSS	1415383	1415383	.	+	.	Name=TSS213
CADEHJ010000001.1	CrossMap	TSS	1418765	1418765	.	-	.	Name=TSS214
CADEHJ010000001.1	CrossMap	TSS	1419128	1419128	.	-	.	Name=TSS215
CADEHJ010000001.1	CrossMap	TSS	1419211	1419211	.	+	.	Name=TSS216
CADEHJ010000001.1	CrossMap	TSS	1419516	1419516	.	+	.	Name=TSS217
CADEHJ010000001.1	CrossMap	TSS	1421751	1421751	.	-	.	Name=TSS218
CADEHJ010000001.1	CrossMap	TSS	1421865	1421865	.	+	.	Name=TSS219
CADEHJ010000001.1	CrossMap	TSS	1422949	1422949	.	+	.	Name=TSS220
CADEHJ010000001.1	CrossMap	TSS	146182	146182	.	+	.	Name=TSS221
CADEHJ010000001.1	CrossMap	TSS	1426189	1426189	.	-	.	Name=TSS222
CADEHJ010000001.1	CrossMap	TSS	1426386	1426386	.	+	.	Name=TSS223
CADEHJ010000001.1	CrossMap	TSS	1427907	1427907	.	+	.	Name=TSS224
CADEHJ010000001.1	CrossMap	TSS	1431646	1431646	.	+	.	Name=TSS225
CADEHJ010000001.1	CrossMap	TSS	1434299	1434299	.	+	.	Name=TSS226
CADEHJ010000001.1	CrossMap	TSS	147599	147599	.	+	.	Name=TSS227
CADEHJ010000001.1	CrossMap	TSS	1438212	1438212	.	+	.	Name=TSS228
CADEHJ010000001.1	CrossMap	TSS	1439471	1439471	.	+	.	Name=TSS229
CADEHJ010000001.1	CrossMap	TSS	1439844	1439844	.	+	.	Name=TSS230
CADEHJ010000001.1	CrossMap	TSS	1441289	1441289	.	+	.	Name=TSS231
CADEHJ010000001.1	CrossMap	TSS	1443081	1443081	.	+	.	Name=TSS232
CADEHJ010000001.1	CrossMap	TSS	1448444	1448444	.	+	.	Name=TSS233
CADEHJ010000001.1	CrossMap	TSS	1450759	1450759	.	+	.	Name=TSS234
CADEHJ010000001.1	CrossMap	TSS	1452266	1452266	.	+	.	Name=TSS235
CADEHJ010000001.1	CrossMap	TSS	1457944	1457944	.	-	.	Name=TSS236
CADEHJ010000001.1	CrossMap	TSS	1464117	1464117	.	-	.	Name=TSS237
CADEHJ010000001.1	CrossMap	TSS	1464658	1464658	.	+	.	Name=TSS238
CADEHJ010000001.1	CrossMap	TSS	1468093	1468093	.	-	.	Name=TSS239
CADEHJ010000001.1	CrossMap	TSS	1469564	1469564	.	-	.	Name=TSS240
CADEHJ010000001.1	CrossMap	TSS	1473169	1473169	.	-	.	Name=TSS241
CADEHJ010000001.1	CrossMap	TSS	1474169	1474169	.	-	.	Name=TSS242
CADEHJ010000001.1	CrossMap	TSS	1474621	1474621	.	-	.	Name=TSS243
CADEHJ010000001.1	CrossMap	TSS	1474691	1474691	.	+	.	Name=TSS244
CADEHJ010000001.1	CrossMap	TSS	1477061	1477061	.	-	.	Name=TSS245
CADEHJ010000001.1	CrossMap	TSS	1478442	1478442	.	-	.	Name=TSS246
CADEHJ010000001.1	CrossMap	TSS	149755	149755	.	+	.	Name=TSS247
CADEHJ010000001.1	CrossMap	TSS	1483438	1483438	.	-	.	Name=TSS248
CADEHJ010000001.1	CrossMap	TSS	1485758	1485758	.	-	.	Name=TSS249
CADEHJ010000001.1	CrossMap	TSS	1486579	1486579	.	-	.	Name=TSS250
CADEHJ010000001.1	CrossMap	TSS	1487652	1487652	.	+	.	Name=TSS251
CADEHJ010000001.1	CrossMap	TSS	1494062	1494062	.	-	.	Name=TSS252
CADEHJ010000001.1	CrossMap	TSS	1495010	1495010	.	-	.	Name=TSS253
CADEHJ010000001.1	CrossMap	TSS	1496309	1496309	.	-	.	Name=TSS254
CADEHJ010000001.1	CrossMap	TSS	1500538	1500538	.	-	.	Name=TSS255
CADEHJ010000001.1	CrossMap	TSS	1503961	1503961	.	-	.	Name=TSS256
CADEHJ010000001.1	CrossMap	TSS	1503974	1503974	.	-	.	Name=TSS257
CADEHJ010000001.1	CrossMap	TSS	1507163	1507163	.	-	.	Name=TSS258
CADEHJ010000001.1	CrossMap	TSS	1507985	1507985	.	-	.	Name=TSS259
CADEHJ010000001.1	CrossMap	TSS	1508070	1508070	.	+	.	Name=TSS260
CADEHJ010000001.1	CrossMap	TSS	1508312	1508312	.	+	.	Name=TSS261
CADEHJ010000001.1	CrossMap	TSS	1509136	1509136	.	-	.	Name=TSS262
CADEHJ010000001.1	CrossMap	TSS	1509846	1509846	.	-	.	Name=TSS263
CADEHJ010000001.1	CrossMap	TSS	1513169	1513169	.	-	.	Name=TSS264
CADEHJ010000001.1	CrossMap	TSS	153888	153888	.	-	.	Name=TSS265
CADEHJ010000001.1	CrossMap	TSS	1514142	1514142	.	-	.	Name=TSS266
CADEHJ010000001.1	CrossMap	TSS	1515057	1515057	.	-	.	Name=TSS267
CADEHJ010000001.1	CrossMap	TSS	1516913	1516913	.	-	.	Name=TSS268
CADEHJ010000001.1	CrossMap	TSS	1518088	1518088	.	-	.	Name=TSS269
CADEHJ010000001.1	CrossMap	TSS	1520060	1520060	.	-	.	Name=TSS270
CADEHJ010000001.1	CrossMap	TSS	1520071	1520071	.	-	.	Name=TSS271
CADEHJ010000001.1	CrossMap	TSS	1520077	1520077	.	-	.	Name=TSS272
CADEHJ010000001.1	CrossMap	TSS	1520691	1520691	.	-	.	Name=TSS273
CADEHJ010000001.1	CrossMap	TSS	1521765	1521765	.	-	.	Name=TSS274
CADEHJ010000001.1	CrossMap	TSS	1523064	1523064	.	-	.	Name=TSS275
CADEHJ010000001.1	CrossMap	TSS	1524204	1524204	.	+	.	Name=TSS276
CADEHJ010000001.1	CrossMap	TSS	1526611	1526611	.	-	.	Name=TSS277
CADEHJ010000001.1	CrossMap	TSS	1526722	1526722	.	+	.	Name=TSS278
CADEHJ010000001.1	CrossMap	TSS	1528196	1528196	.	-	.	Name=TSS279
CADEHJ010000001.1	CrossMap	TSS	1531077	1531077	.	-	.	Name=TSS280
CADEHJ010000001.1	CrossMap	TSS	1531742	1531742	.	-	.	Name=TSS281
CADEHJ010000001.1	CrossMap	TSS	155892	155892	.	+	.	Name=TSS282
CADEHJ010000001.1	CrossMap	TSS	1533741	1533741	.	-	.	Name=TSS283
CADEHJ010000001.1	CrossMap	TSS	1533761	1533761	.	-	.	Name=TSS284
CADEHJ010000001.1	CrossMap	TSS	1536905	1536905	.	-	.	Name=TSS285
CADEHJ010000001.1	CrossMap	TSS	1537004	1537004	.	+	.	Name=TSS286
CADEHJ010000001.1	CrossMap	TSS	1539910	1539910	.	-	.	Name=TSS287
CADEHJ010000001.1	CrossMap	TSS	1540288	1540288	.	-	.	Name=TSS288
CADEHJ010000001.1	CrossMap	TSS	1540870	1540870	.	-	.	Name=TSS289
CADEHJ010000001.1	CrossMap	TSS	1543432	1543432	.	-	.	Name=TSS290
CADEHJ010000001.1	CrossMap	TSS	1545310	1545310	.	-	.	Name=TSS291
CADEHJ010000001.1	CrossMap	TSS	1548129	1548129	.	-	.	Name=TSS292
CADEHJ010000001.1	CrossMap	TSS	157438	157438	.	+	.	Name=TSS293
CADEHJ010000001.1	CrossMap	TSS	1550674	1550674	.	+	.	Name=TSS294
CADEHJ010000001.1	CrossMap	TSS	1556724	1556724	.	-	.	Name=TSS295
CADEHJ010000001.1	CrossMap	TSS	1557957	1557957	.	-	.	Name=TSS296
CADEHJ010000001.1	CrossMap	TSS	1559148	1559148	.	-	.	Name=TSS297
CADEHJ010000001.1	CrossMap	TSS	1560788	1560788	.	-	.	Name=TSS298
CADEHJ010000001.1	CrossMap	TSS	1560874	1560874	.	+	.	Name=TSS299
CADEHJ010000001.1	CrossMap	TSS	1561530	1561530	.	+	.	Name=TSS300
CADEHJ010000001.1	CrossMap	TSS	1565508	1565508	.	-	.	Name=TSS301
CADEHJ010000001.1	CrossMap	TSS	1567088	1567088	.	-	.	Name=TSS302
CADEHJ010000001.1	CrossMap	TSS	1567196	1567196	.	+	.	Name=TSS303
CADEHJ010000001.1	CrossMap	TSS	1569055	1569055	.	-	.	Name=TSS304
CADEHJ010000001.1	CrossMap	TSS	1571321	1571321	.	-	.	Name=TSS305
CADEHJ010000001.1	CrossMap	TSS	159820	159820	.	+	.	Name=TSS306
CADEHJ010000001.1	CrossMap	TSS	1574328	1574328	.	-	.	Name=TSS307
CADEHJ010000001.1	CrossMap	TSS	1574784	1574784	.	-	.	Name=TSS309
CADEHJ010000001.1	CrossMap	TSS	1577176	1577176	.	-	.	Name=TSS310
CADEHJ010000001.1	CrossMap	TSS	1577544	1577544	.	-	.	Name=TSS311
CADEHJ010000001.1	CrossMap	TSS	1578007	1578007	.	-	.	Name=TSS312
CADEHJ010000001.1	CrossMap	TSS	1578024	1578024	.	-	.	Name=TSS313
CADEHJ010000001.1	CrossMap	TSS	1579181	1579181	.	-	.	Name=TSS314
CADEHJ010000001.1	CrossMap	TSS	1581933	1581933	.	-	.	Name=TSS315
CADEHJ010000001.1	CrossMap	TSS	1582980	1582980	.	-	.	Name=TSS316
CADEHJ010000001.1	CrossMap	TSS	1583794	1583794	.	-	.	Name=TSS317
CADEHJ010000001.1	CrossMap	TSS	1586105	1586105	.	-	.	Name=TSS318
CADEHJ010000001.1	CrossMap	TSS	1587790	1587790	.	-	.	Name=TSS319
CADEHJ010000001.1	CrossMap	TSS	1588795	1588795	.	-	.	Name=TSS320
CADEHJ010000001.1	CrossMap	TSS	1590040	1590040	.	-	.	Name=TSS321
CADEHJ010000001.1	CrossMap	TSS	1593015	1593015	.	-	.	Name=TSS322
CADEHJ010000001.1	CrossMap	TSS	1595693	1595693	.	-	.	Name=TSS323
CADEHJ010000001.1	CrossMap	TSS	1602016	1602016	.	-	.	Name=TSS324
CADEHJ010000001.1	CrossMap	TSS	1607316	1607316	.	-	.	Name=TSS325
CADEHJ010000001.1	CrossMap	TSS	1608026	1608026	.	-	.	Name=TSS326
CADEHJ010000001.1	CrossMap	TSS	1610333	1610333	.	-	.	Name=TSS327
CADEHJ010000001.1	CrossMap	TSS	1612693	1612693	.	-	.	Name=TSS328
CADEHJ010000001.1	CrossMap	TSS	1612713	1612713	.	-	.	Name=TSS329
CADEHJ010000001.1	CrossMap	TSS	1612720	1612720	.	-	.	Name=TSS330
CADEHJ010000001.1	CrossMap	TSS	1613202	1613202	.	-	.	Name=TSS331
CADEHJ010000001.1	CrossMap	TSS	15707	15707	.	+	.	Name=TSS332
CADEHJ010000001.1	CrossMap	TSS	1617357	1617357	.	-	.	Name=TSS333
CADEHJ010000001.1	CrossMap	TSS	1622834	1622834	.	-	.	Name=TSS334
CADEHJ010000001.1	CrossMap	TSS	1624084	1624084	.	-	.	Name=TSS335
CADEHJ010000001.1	CrossMap	TSS	1625306	1625306	.	-	.	Name=TSS336
CADEHJ010000001.1	CrossMap	TSS	1625314	1625314	.	-	.	Name=TSS337
CADEHJ010000001.1	CrossMap	TSS	1625320	1625320	.	-	.	Name=TSS338
CADEHJ010000001.1	CrossMap	TSS	1625331	1625331	.	-	.	Name=TSS339
CADEHJ010000001.1	CrossMap	TSS	1626177	1626177	.	-	.	Name=TSS340
CADEHJ010000001.1	CrossMap	TSS	1629726	1629726	.	-	.	Name=TSS341
CADEHJ010000001.1	CrossMap	TSS	1632120	1632120	.	-	.	Name=TSS342
CADEHJ010000001.1	CrossMap	TSS	1632837	1632837	.	-	.	Name=TSS343
CADEHJ010000001.1	CrossMap	TSS	1632941	1632941	.	+	.	Name=TSS344
CADEHJ010000001.1	CrossMap	TSS	1635271	1635271	.	-	.	Name=TSS345
CADEHJ010000001.1	CrossMap	TSS	1635425	1635425	.	+	.	Name=TSS346
CADEHJ010000001.1	CrossMap	TSS	166099	166099	.	-	.	Name=TSS347
CADEHJ010000001.1	CrossMap	TSS	166248	166248	.	+	.	Name=TSS348
CADEHJ010000001.1	CrossMap	TSS	1638226	1638226	.	-	.	Name=TSS349
CADEHJ010000001.1	CrossMap	TSS	1638908	1638908	.	-	.	Name=TSS350
CADEHJ010000001.1	CrossMap	TSS	1640537	1640537	.	-	.	Name=TSS351
CADEHJ010000001.1	CrossMap	TSS	1640654	1640654	.	+	.	Name=TSS352
CADEHJ010000001.1	CrossMap	TSS	1646667	1646667	.	-	.	Name=TSS353
CADEHJ010000001.1	CrossMap	TSS	1649190	1649190	.	-	.	Name=TSS354
CADEHJ010000001.1	CrossMap	TSS	167471	167471	.	+	.	Name=TSS355
CADEHJ010000001.1	CrossMap	TSS	1651136	1651136	.	-	.	Name=TSS356
CADEHJ010000001.1	CrossMap	TSS	1651267	1651267	.	+	.	Name=TSS357
CADEHJ010000001.1	CrossMap	TSS	1651819	1651819	.	+	.	Name=TSS358
CADEHJ010000001.1	CrossMap	TSS	1654242	1654242	.	-	.	Name=TSS360
CADEHJ010000001.1	CrossMap	TSS	1655358	1655358	.	-	.	Name=TSS361
CADEHJ010000001.1	CrossMap	TSS	1656643	1656643	.	-	.	Name=TSS362
CADEHJ010000001.1	CrossMap	TSS	1657931	1657931	.	-	.	Name=TSS363
CADEHJ010000001.1	CrossMap	TSS	1658038	1658038	.	+	.	Name=TSS364
CADEHJ010000001.1	CrossMap	TSS	1659823	1659823	.	-	.	Name=TSS365
CADEHJ010000001.1	CrossMap	TSS	1661439	1661439	.	-	.	Name=TSS366
CADEHJ010000001.1	CrossMap	TSS	1663943	1663943	.	-	.	Name=TSS367
CADEHJ010000001.1	CrossMap	TSS	1664873	1664873	.	-	.	Name=TSS368
CADEHJ010000001.1	CrossMap	TSS	1664885	1664885	.	-	.	Name=TSS369
CADEHJ010000001.1	CrossMap	TSS	1666023	1666023	.	-	.	Name=TSS370
CADEHJ010000001.1	CrossMap	TSS	1666326	1666326	.	-	.	Name=TSS371
CADEHJ010000001.1	CrossMap	TSS	1667419	1667419	.	-	.	Name=TSS372
CADEHJ010000001.1	CrossMap	TSS	1667528	1667528	.	+	.	Name=TSS373
CADEHJ010000001.1	CrossMap	TSS	1668259	1668259	.	-	.	Name=TSS374
CADEHJ010000001.1	CrossMap	TSS	1669907	1669907	.	-	.	Name=TSS375
CADEHJ010000001.1	CrossMap	TSS	1669915	1669915	.	-	.	Name=TSS376
CADEHJ010000001.1	CrossMap	TSS	1670741	1670741	.	-	.	Name=TSS377
CADEHJ010000001.1	CrossMap	TSS	1673971	1673971	.	-	.	Name=TSS378
CADEHJ010000001.1	CrossMap	TSS	1675426	1675426	.	-	.	Name=TSS379
CADEHJ010000001.1	CrossMap	TSS	1675930	1675930	.	-	.	Name=TSS380
CADEHJ010000001.1	CrossMap	TSS	1679169	1679169	.	-	.	Name=TSS381
CADEHJ010000001.1	CrossMap	TSS	1680880	1680880	.	-	.	Name=TSS382
CADEHJ010000001.1	CrossMap	TSS	170802	170802	.	-	.	Name=TSS383
CADEHJ010000001.1	CrossMap	TSS	1681409	1681409	.	-	.	Name=TSS384
CADEHJ010000001.1	CrossMap	TSS	170867	170867	.	+	.	Name=TSS385
CADEHJ010000001.1	CrossMap	TSS	1684111	1684111	.	-	.	Name=TSS386
CADEHJ010000001.1	CrossMap	TSS	1688332	1688332	.	-	.	Name=TSS387
CADEHJ010000001.1	CrossMap	TSS	1688702	1688702	.	+	.	Name=TSS388
CADEHJ010000001.1	CrossMap	TSS	1691531	1691531	.	+	.	Name=TSS389
CADEHJ010000001.1	CrossMap	TSS	1692034	1692034	.	+	.	Name=TSS390
CADEHJ010000001.1	CrossMap	TSS	1695895	1695895	.	-	.	Name=TSS391
CADEHJ010000001.1	CrossMap	TSS	1698721	1698721	.	-	.	Name=TSS392
CADEHJ010000001.1	CrossMap	TSS	1700086	1700086	.	-	.	Name=TSS393
CADEHJ010000001.1	CrossMap	TSS	1700118	1700118	.	-	.	Name=TSS394
CADEHJ010000001.1	CrossMap	TSS	1700580	1700580	.	-	.	Name=TSS395
CADEHJ010000001.1	CrossMap	TSS	1703338	1703338	.	-	.	Name=TSS396
CADEHJ010000001.1	CrossMap	TSS	173280	173280	.	+	.	Name=TSS397
CADEHJ010000001.1	CrossMap	TSS	1707634	1707634	.	-	.	Name=TSS398
CADEHJ010000001.1	CrossMap	TSS	1707656	1707656	.	+	.	Name=TSS399
CADEHJ010000001.1	CrossMap	TSS	1708733	1708733	.	-	.	Name=TSS400
CADEHJ010000001.1	CrossMap	TSS	1709517	1709517	.	-	.	Name=TSS401
CADEHJ010000001.1	CrossMap	TSS	1715418	1715418	.	-	.	Name=TSS402
CADEHJ010000001.1	CrossMap	TSS	1716071	1716071	.	-	.	Name=TSS403
CADEHJ010000001.1	CrossMap	TSS	1717076	1717076	.	-	.	Name=TSS404
CADEHJ010000001.1	CrossMap	TSS	1717671	1717671	.	-	.	Name=TSS405
CADEHJ010000001.1	CrossMap	TSS	1719464	1719464	.	-	.	Name=TSS406
CADEHJ010000001.1	CrossMap	TSS	1724381	1724381	.	-	.	Name=TSS407
CADEHJ010000001.1	CrossMap	TSS	1727972	1727972	.	-	.	Name=TSS408
CADEHJ010000001.1	CrossMap	TSS	1728456	1728456	.	-	.	Name=TSS409
CADEHJ010000001.1	CrossMap	TSS	1729491	1729491	.	-	.	Name=TSS410
CADEHJ010000001.1	CrossMap	TSS	1729644	1729644	.	+	.	Name=TSS411
CADEHJ010000001.1	CrossMap	TSS	175993	175993	.	-	.	Name=TSS412
CADEHJ010000001.1	CrossMap	TSS	1735216	1735216	.	-	.	Name=TSS413
CADEHJ010000001.1	CrossMap	TSS	1736206	1736206	.	-	.	Name=TSS414
CADEHJ010000001.1	CrossMap	TSS	1736213	1736213	.	-	.	Name=TSS415
CADEHJ010000001.1	CrossMap	TSS	1736442	1736442	.	-	.	Name=TSS416
CADEHJ010000001.1	CrossMap	TSS	1737028	1737028	.	+	.	Name=TSS417
CADEHJ010000001.1	CrossMap	TSS	1737280	1737280	.	+	.	Name=TSS418
CADEHJ010000001.1	CrossMap	TSS	1740653	1740653	.	-	.	Name=TSS419
CADEHJ010000001.1	CrossMap	TSS	1744632	1744632	.	-	.	Name=TSS420
CADEHJ010000001.1	CrossMap	TSS	1744740	1744740	.	+	.	Name=TSS421
CADEHJ010000001.1	CrossMap	TSS	1745297	1745297	.	+	.	Name=TSS422
CADEHJ010000001.1	CrossMap	TSS	1752460	1752460	.	-	.	Name=TSS423
CADEHJ010000001.1	CrossMap	TSS	1754057	1754057	.	-	.	Name=TSS426
CADEHJ010000001.1	CrossMap	TSS	1754097	1754097	.	-	.	Name=TSS427
CADEHJ010000001.1	CrossMap	TSS	1754289	1754289	.	-	.	Name=TSS428
CADEHJ010000001.1	CrossMap	TSS	1754555	1754555	.	-	.	Name=TSS429
CADEHJ010000001.1	CrossMap	TSS	1754679	1754679	.	-	.	Name=TSS430
CADEHJ010000001.1	CrossMap	TSS	1754736	1754736	.	-	.	Name=TSS431
CADEHJ010000001.1	CrossMap	TSS	1754824	1754824	.	-	.	Name=TSS432
CADEHJ010000001.1	CrossMap	TSS	1754976	1754976	.	-	.	Name=TSS433
CADEHJ010000001.1	CrossMap	TSS	1755292	1755292	.	-	.	Name=TSS434
CADEHJ010000001.1	CrossMap	TSS	1755302	1755302	.	-	.	Name=TSS435
CADEHJ010000001.1	CrossMap	TSS	178598	178598	.	+	.	Name=TSS436
CADEHJ010000001.1	CrossMap	TSS	1760884	1760884	.	-	.	Name=TSS437
CADEHJ010000001.1	CrossMap	TSS	1761559	1761559	.	-	.	Name=TSS438
CADEHJ010000001.1	CrossMap	TSS	1762587	1762587	.	-	.	Name=TSS439
CADEHJ010000001.1	CrossMap	TSS	1762675	1762675	.	+	.	Name=TSS440
CADEHJ010000001.1	CrossMap	TSS	1764046	1764046	.	+	.	Name=TSS441
CADEHJ010000001.1	CrossMap	TSS	1765800	1765800	.	-	.	Name=TSS442
CADEHJ010000001.1	CrossMap	TSS	1766703	1766703	.	-	.	Name=TSS443
CADEHJ010000001.1	CrossMap	TSS	1767833	1767833	.	+	.	Name=TSS444
CADEHJ010000001.1	CrossMap	TSS	1767864	1767864	.	-	.	Name=TSS445
CADEHJ010000001.1	CrossMap	TSS	1769730	1769730	.	-	.	Name=TSS446
CADEHJ010000001.1	CrossMap	TSS	179541	179541	.	+	.	Name=TSS447
CADEHJ010000001.1	CrossMap	TSS	1770513	1770513	.	-	.	Name=TSS448
CADEHJ010000001.1	CrossMap	TSS	1770572	1770572	.	+	.	Name=TSS449
CADEHJ010000001.1	CrossMap	TSS	1774876	1774876	.	-	.	Name=TSS450
CADEHJ010000001.1	CrossMap	TSS	1775000	1775000	.	+	.	Name=TSS451
CADEHJ010000001.1	CrossMap	TSS	1776596	1776596	.	-	.	Name=TSS452
CADEHJ010000001.1	CrossMap	TSS	1776719	1776719	.	+	.	Name=TSS453
CADEHJ010000001.1	CrossMap	TSS	1780143	1780143	.	-	.	Name=TSS454
CADEHJ010000001.1	CrossMap	TSS	1780638	1780638	.	+	.	Name=TSS455
CADEHJ010000001.1	CrossMap	TSS	1782280	1782280	.	+	.	Name=TSS456
CADEHJ010000001.1	CrossMap	TSS	1782348	1782348	.	-	.	Name=TSS457
CADEHJ010000001.1	CrossMap	TSS	1782893	1782893	.	-	.	Name=TSS458
CADEHJ010000001.1	CrossMap	TSS	1784263	1784263	.	-	.	Name=TSS459
CADEHJ010000001.1	CrossMap	TSS	1784352	1784352	.	+	.	Name=TSS460
CADEHJ010000001.1	CrossMap	TSS	1784978	1784978	.	+	.	Name=TSS461
CADEHJ010000001.1	CrossMap	TSS	1787771	1787771	.	+	.	Name=TSS462
CADEHJ010000001.1	CrossMap	TSS	1789706	1789706	.	-	.	Name=TSS463
CADEHJ010000001.1	CrossMap	TSS	1790558	1790558	.	+	.	Name=TSS464
CADEHJ010000001.1	CrossMap	TSS	1791085	1791085	.	+	.	Name=TSS465
CADEHJ010000001.1	CrossMap	TSS	181670	181670	.	+	.	Name=TSS466
CADEHJ010000001.1	CrossMap	TSS	1792371	1792371	.	-	.	Name=TSS467
CADEHJ010000001.1	CrossMap	TSS	1793968	1793968	.	-	.	Name=TSS468
CADEHJ010000001.1	CrossMap	TSS	1794364	1794364	.	-	.	Name=TSS469
CADEHJ010000001.1	CrossMap	TSS	1794727	1794727	.	-	.	Name=TSS470
CADEHJ010000001.1	CrossMap	TSS	1797195	1797195	.	-	.	Name=TSS471
CADEHJ010000001.1	CrossMap	TSS	1798651	1798651	.	-	.	Name=TSS472
CADEHJ010000001.1	CrossMap	TSS	1801605	1801605	.	-	.	Name=TSS473
CADEHJ010000001.1	CrossMap	TSS	1802631	1802631	.	-	.	Name=TSS474
CADEHJ010000001.1	CrossMap	TSS	1813327	1813327	.	-	.	Name=TSS475
CADEHJ010000001.1	CrossMap	TSS	1819277	1819277	.	-	.	Name=TSS476
CADEHJ010000001.1	CrossMap	TSS	1819286	1819286	.	-	.	Name=TSS477
CADEHJ010000001.1	CrossMap	TSS	1820429	1820429	.	-	.	Name=TSS478
CADEHJ010000001.1	CrossMap	TSS	1822893	1822893	.	-	.	Name=TSS479
CADEHJ010000001.1	CrossMap	TSS	1827935	1827935	.	-	.	Name=TSS480
CADEHJ010000001.1	CrossMap	TSS	1830732	1830732	.	-	.	Name=TSS481
CADEHJ010000001.1	CrossMap	TSS	1831372	1831372	.	-	.	Name=TSS482
CADEHJ010000001.1	CrossMap	TSS	1831491	1831491	.	+	.	Name=TSS483
CADEHJ010000001.1	CrossMap	TSS	1832657	1832657	.	-	.	Name=TSS484
CADEHJ010000001.1	CrossMap	TSS	1833289	1833289	.	-	.	Name=TSS485
CADEHJ010000001.1	CrossMap	TSS	1835127	1835127	.	-	.	Name=TSS486
CADEHJ010000001.1	CrossMap	TSS	1836246	1836246	.	-	.	Name=TSS487
CADEHJ010000001.1	CrossMap	TSS	1839611	1839611	.	-	.	Name=TSS488
CADEHJ010000001.1	CrossMap	TSS	1842812	1842812	.	-	.	Name=TSS489
CADEHJ010000001.1	CrossMap	TSS	1845040	1845040	.	-	.	Name=TSS490
CADEHJ010000001.1	CrossMap	TSS	1845775	1845775	.	-	.	Name=TSS491
CADEHJ010000001.1	CrossMap	TSS	1847953	1847953	.	-	.	Name=TSS492
CADEHJ010000001.1	CrossMap	TSS	1848139	1848139	.	-	.	Name=TSS493
CADEHJ010000001.1	CrossMap	TSS	1855805	1855805	.	-	.	Name=TSS494
CADEHJ010000001.1	CrossMap	TSS	1527	1527	.	+	.	Name=TSS495
CADEHJ010000001.1	CrossMap	TSS	1860337	1860337	.	-	.	Name=TSS496
CADEHJ010000001.1	CrossMap	TSS	1860823	1860823	.	-	.	Name=TSS497
CADEHJ010000001.1	CrossMap	TSS	1861563	1861563	.	-	.	Name=TSS498
CADEHJ010000001.1	CrossMap	TSS	1866778	1866778	.	-	.	Name=TSS499
CADEHJ010000001.1	CrossMap	TSS	1867300	1867300	.	-	.	Name=TSS500
CADEHJ010000001.1	CrossMap	TSS	1868369	1868369	.	+	.	Name=TSS501
CADEHJ010000001.1	CrossMap	TSS	1870040	1870040	.	-	.	Name=TSS502
CADEHJ010000001.1	CrossMap	TSS	1870624	1870624	.	-	.	Name=TSS503
CADEHJ010000001.1	CrossMap	TSS	1870664	1870664	.	+	.	Name=TSS504
CADEHJ010000001.1	CrossMap	TSS	1871871	1871871	.	-	.	Name=TSS505
CADEHJ010000001.1	CrossMap	TSS	1871888	1871888	.	-	.	Name=TSS506
CADEHJ010000001.1	CrossMap	TSS	1872638	1872638	.	-	.	Name=TSS507
CADEHJ010000001.1	CrossMap	TSS	1874022	1874022	.	-	.	Name=TSS508
CADEHJ010000001.1	CrossMap	TSS	1875167	1875167	.	-	.	Name=TSS509
CADEHJ010000001.1	CrossMap	TSS	1875271	1875271	.	+	.	Name=TSS510
CADEHJ010000001.1	CrossMap	TSS	1879163	1879163	.	-	.	Name=TSS511
CADEHJ010000001.1	CrossMap	TSS	1879919	1879919	.	-	.	Name=TSS512
CADEHJ010000001.1	CrossMap	TSS	1880273	1880273	.	-	.	Name=TSS513
CADEHJ010000001.1	CrossMap	TSS	1880563	1880563	.	-	.	Name=TSS514
CADEHJ010000001.1	CrossMap	TSS	1886244	1886244	.	-	.	Name=TSS515
CADEHJ010000001.1	CrossMap	TSS	1887445	1887445	.	-	.	Name=TSS516
CADEHJ010000001.1	CrossMap	TSS	1889277	1889277	.	-	.	Name=TSS517
CADEHJ010000001.1	CrossMap	TSS	1894682	1894682	.	-	.	Name=TSS518
CADEHJ010000001.1	CrossMap	TSS	1895091	1895091	.	-	.	Name=TSS519
CADEHJ010000001.1	CrossMap	TSS	1897898	1897898	.	-	.	Name=TSS520
CADEHJ010000001.1	CrossMap	TSS	1898583	1898583	.	-	.	Name=TSS521
CADEHJ010000001.1	CrossMap	TSS	1900711	1900711	.	-	.	Name=TSS522
CADEHJ010000001.1	CrossMap	TSS	1901600	1901600	.	-	.	Name=TSS523
CADEHJ010000001.1	CrossMap	TSS	1904528	1904528	.	-	.	Name=TSS524
CADEHJ010000001.1	CrossMap	TSS	1904679	1904679	.	+	.	Name=TSS525
CADEHJ010000001.1	CrossMap	TSS	1904768	1904768	.	+	.	Name=TSS526
CADEHJ010000001.1	CrossMap	TSS	1907299	1907299	.	-	.	Name=TSS527
CADEHJ010000001.1	CrossMap	TSS	193403	193403	.	+	.	Name=TSS528
CADEHJ010000001.1	CrossMap	TSS	1912358	1912358	.	-	.	Name=TSS529
CADEHJ010000001.1	CrossMap	TSS	1915961	1915961	.	-	.	Name=TSS530
CADEHJ010000001.1	CrossMap	TSS	1917080	1917080	.	-	.	Name=TSS531
CADEHJ010000001.1	CrossMap	TSS	1917855	1917855	.	-	.	Name=TSS532
CADEHJ010000001.1	CrossMap	TSS	1917923	1917923	.	+	.	Name=TSS533
CADEHJ010000001.1	CrossMap	TSS	1919717	1919717	.	+	.	Name=TSS534
CADEHJ010000001.1	CrossMap	TSS	1919898	1919898	.	+	.	Name=TSS535
CADEHJ010000001.1	CrossMap	TSS	194473	194473	.	+	.	Name=TSS536
CADEHJ010000001.1	CrossMap	TSS	1926663	1926663	.	-	.	Name=TSS537
CADEHJ010000001.1	CrossMap	TSS	1931321	1931321	.	-	.	Name=TSS538
CADEHJ010000001.1	CrossMap	TSS	1932064	1932064	.	-	.	Name=TSS539
CADEHJ010000001.1	CrossMap	TSS	1932142	1932142	.	+	.	Name=TSS540
CADEHJ010000001.1	CrossMap	TSS	195793	195793	.	+	.	Name=TSS541
CADEHJ010000001.1	CrossMap	TSS	1934780	1934780	.	-	.	Name=TSS542
CADEHJ010000001.1	CrossMap	TSS	1936129	1936129	.	-	.	Name=TSS543
CADEHJ010000001.1	CrossMap	TSS	1936219	1936219	.	+	.	Name=TSS544
CADEHJ010000001.1	CrossMap	TSS	1937165	1937165	.	+	.	Name=TSS545
CADEHJ010000001.1	CrossMap	TSS	1940193	1940193	.	-	.	Name=TSS546
CADEHJ010000001.1	CrossMap	TSS	1942284	1942284	.	-	.	Name=TSS547
CADEHJ010000001.1	CrossMap	TSS	1942619	1942619	.	-	.	Name=TSS548
CADEHJ010000001.1	CrossMap	TSS	1945145	1945145	.	-	.	Name=TSS549
CADEHJ010000001.1	CrossMap	TSS	1946105	1946105	.	-	.	Name=TSS550
CADEHJ010000001.1	CrossMap	TSS	1946828	1946828	.	-	.	Name=TSS551
CADEHJ010000001.1	CrossMap	TSS	1946845	1946845	.	-	.	Name=TSS552
CADEHJ010000001.1	CrossMap	TSS	1946870	1946870	.	-	.	Name=TSS553
CADEHJ010000001.1	CrossMap	TSS	1947099	1947099	.	-	.	Name=TSS554
CADEHJ010000001.1	CrossMap	TSS	1947389	1947389	.	-	.	Name=TSS555
CADEHJ010000001.1	CrossMap	TSS	197381	197381	.	+	.	Name=TSS556
CADEHJ010000001.1	CrossMap	TSS	1951433	1951433	.	-	.	Name=TSS557
CADEHJ010000001.1	CrossMap	TSS	1951546	1951546	.	+	.	Name=TSS558
CADEHJ010000001.1	CrossMap	TSS	197765	197765	.	+	.	Name=TSS559
CADEHJ010000001.1	CrossMap	TSS	1956915	1956915	.	-	.	Name=TSS560
CADEHJ010000001.1	CrossMap	TSS	1957876	1957876	.	-	.	Name=TSS561
CADEHJ010000001.1	CrossMap	TSS	1960248	1960248	.	-	.	Name=TSS562
CADEHJ010000001.1	CrossMap	TSS	1961312	1961312	.	-	.	Name=TSS563
CADEHJ010000001.1	CrossMap	TSS	1964591	1964591	.	-	.	Name=TSS564
CADEHJ010000001.1	CrossMap	TSS	1965134	1965134	.	-	.	Name=TSS565
CADEHJ010000001.1	CrossMap	TSS	1966383	1966383	.	-	.	Name=TSS566
CADEHJ010000001.1	CrossMap	TSS	1966982	1966982	.	-	.	Name=TSS567
CADEHJ010000001.1	CrossMap	TSS	1967191	1967191	.	+	.	Name=TSS568
CADEHJ010000001.1	CrossMap	TSS	1967608	1967608	.	+	.	Name=TSS569
CADEHJ010000001.1	CrossMap	TSS	1968956	1968956	.	-	.	Name=TSS570
CADEHJ010000001.1	CrossMap	TSS	1969310	1969310	.	-	.	Name=TSS571
CADEHJ010000001.1	CrossMap	TSS	1970508	1970508	.	-	.	Name=TSS572
CADEHJ010000001.1	CrossMap	TSS	199532	199532	.	+	.	Name=TSS573
CADEHJ010000001.1	CrossMap	TSS	1972716	1972716	.	-	.	Name=TSS574
CADEHJ010000001.1	CrossMap	TSS	1974307	1974307	.	-	.	Name=TSS575
CADEHJ010000001.1	CrossMap	TSS	1976422	1976422	.	-	.	Name=TSS576
CADEHJ010000001.1	CrossMap	TSS	1977438	1977438	.	-	.	Name=TSS577
CADEHJ010000001.1	CrossMap	TSS	1977611	1977611	.	+	.	Name=TSS578
CADEHJ010000001.1	CrossMap	TSS	200534	200534	.	+	.	Name=TSS579
CADEHJ010000001.1	CrossMap	TSS	1982705	1982705	.	-	.	Name=TSS580
CADEHJ010000001.1	CrossMap	TSS	1985356	1985356	.	-	.	Name=TSS581
CADEHJ010000001.1	CrossMap	TSS	1985926	1985926	.	-	.	Name=TSS582
CADEHJ010000001.1	CrossMap	TSS	1988795	1988795	.	-	.	Name=TSS583
CADEHJ010000001.1	CrossMap	TSS	1991598	1991598	.	-	.	Name=TSS584
CADEHJ010000001.1	CrossMap	TSS	1994857	1994857	.	-	.	Name=TSS585
CADEHJ010000001.1	CrossMap	TSS	1995494	1995494	.	-	.	Name=TSS586
CADEHJ010000001.1	CrossMap	TSS	1996102	1996102	.	+	.	Name=TSS587
CADEHJ010000001.1	CrossMap	TSS	1997576	1997576	.	-	.	Name=TSS588
CADEHJ010000001.1	CrossMap	TSS	1998631	1998631	.	+	.	Name=TSS589
CADEHJ010000001.1	CrossMap	TSS	2001062	2001062	.	+	.	Name=TSS590
CADEHJ010000001.1	CrossMap	TSS	2001148	2001148	.	+	.	Name=TSS591
CADEHJ010000001.1	CrossMap	TSS	2001940	2001940	.	+	.	Name=TSS592
CADEHJ010000001.1	CrossMap	TSS	2004781	2004781	.	+	.	Name=TSS593
CADEHJ010000001.1	CrossMap	TSS	2008463	2008463	.	-	.	Name=TSS594
CADEHJ010000001.1	CrossMap	TSS	2009280	2009280	.	-	.	Name=TSS595
CADEHJ010000001.1	CrossMap	TSS	2010583	2010583	.	-	.	Name=TSS596
CADEHJ010000001.1	CrossMap	TSS	2011868	2011868	.	-	.	Name=TSS597
CADEHJ010000001.1	CrossMap	TSS	203761	203761	.	+	.	Name=TSS598
CADEHJ010000001.1	CrossMap	TSS	2014404	2014404	.	-	.	Name=TSS599
CADEHJ010000001.1	CrossMap	TSS	2015879	2015879	.	-	.	Name=TSS600
CADEHJ010000001.1	CrossMap	TSS	2015887	2015887	.	-	.	Name=TSS601
CADEHJ010000001.1	CrossMap	TSS	204214	204214	.	+	.	Name=TSS602
CADEHJ010000001.1	CrossMap	TSS	2018184	2018184	.	-	.	Name=TSS603
CADEHJ010000001.1	CrossMap	TSS	2018785	2018785	.	-	.	Name=TSS604
CADEHJ010000001.1	CrossMap	TSS	2021291	2021291	.	-	.	Name=TSS605
CADEHJ010000001.1	CrossMap	TSS	2021920	2021920	.	-	.	Name=TSS606
CADEHJ010000001.1	CrossMap	TSS	2022419	2022419	.	-	.	Name=TSS607
CADEHJ010000001.1	CrossMap	TSS	2023822	2023822	.	-	.	Name=TSS608
CADEHJ010000001.1	CrossMap	TSS	204989	204989	.	+	.	Name=TSS609
CADEHJ010000001.1	CrossMap	TSS	2026281	2026281	.	-	.	Name=TSS610
CADEHJ010000001.1	CrossMap	TSS	2027731	2027731	.	-	.	Name=TSS611
CADEHJ010000001.1	CrossMap	TSS	2030438	2030438	.	-	.	Name=TSS612
CADEHJ010000001.1	CrossMap	TSS	2032551	2032551	.	-	.	Name=TSS613
CADEHJ010000001.1	CrossMap	TSS	2033092	2033092	.	-	.	Name=TSS614
CADEHJ010000001.1	CrossMap	TSS	2033174	2033174	.	+	.	Name=TSS615
CADEHJ010000001.1	CrossMap	TSS	2037731	2037731	.	-	.	Name=TSS616
CADEHJ010000001.1	CrossMap	TSS	2041308	2041308	.	-	.	Name=TSS617
CADEHJ010000001.1	CrossMap	TSS	2044409	2044409	.	-	.	Name=TSS618
CADEHJ010000001.1	CrossMap	TSS	2045066	2045066	.	-	.	Name=TSS619
CADEHJ010000001.1	CrossMap	TSS	2047350	2047350	.	-	.	Name=TSS620
CADEHJ010000001.1	CrossMap	TSS	2048361	2048361	.	-	.	Name=TSS621
CADEHJ010000001.1	CrossMap	TSS	2050753	2050753	.	-	.	Name=TSS622
CADEHJ010000001.1	CrossMap	TSS	2052678	2052678	.	-	.	Name=TSS623
CADEHJ010000001.1	CrossMap	TSS	2053826	2053826	.	-	.	Name=TSS624
CADEHJ010000001.1	CrossMap	TSS	208266	208266	.	-	.	Name=TSS625
CADEHJ010000001.1	CrossMap	TSS	2062348	2062348	.	-	.	Name=TSS626
CADEHJ010000001.1	CrossMap	TSS	2064165	2064165	.	-	.	Name=TSS627
CADEHJ010000001.1	CrossMap	TSS	2064311	2064311	.	+	.	Name=TSS628
CADEHJ010000001.1	CrossMap	TSS	2066005	2066005	.	+	.	Name=TSS629
CADEHJ010000001.1	CrossMap	TSS	2066546	2066546	.	+	.	Name=TSS630
CADEHJ010000001.1	CrossMap	TSS	2066743	2066743	.	-	.	Name=TSS631
CADEHJ010000001.1	CrossMap	TSS	2067634	2067634	.	-	.	Name=TSS632
CADEHJ010000001.1	CrossMap	TSS	209403	209403	.	-	.	Name=TSS633
CADEHJ010000001.1	CrossMap	TSS	209485	209485	.	+	.	Name=TSS634
CADEHJ010000001.1	CrossMap	TSS	209817	209817	.	+	.	Name=TSS635
CADEHJ010000001.1	CrossMap	TSS	2079435	2079435	.	+	.	Name=TSS636
CADEHJ010000001.1	CrossMap	TSS	2081666	2081666	.	-	.	Name=TSS637
CADEHJ010000001.1	CrossMap	TSS	2082728	2082728	.	-	.	Name=TSS638
CADEHJ010000001.1	CrossMap	TSS	2083478	2083478	.	-	.	Name=TSS639
CADEHJ010000001.1	CrossMap	TSS	2084485	2084485	.	-	.	Name=TSS640
CADEHJ010000001.1	CrossMap	TSS	2088706	2088706	.	-	.	Name=TSS641
CADEHJ010000001.1	CrossMap	TSS	211388	211388	.	+	.	Name=TSS642
CADEHJ010000001.1	CrossMap	TSS	2090723	2090723	.	-	.	Name=TSS643
CADEHJ010000001.1	CrossMap	TSS	2091844	2091844	.	-	.	Name=TSS644
CADEHJ010000001.1	CrossMap	TSS	2093641	2093641	.	-	.	Name=TSS645
CADEHJ010000001.1	CrossMap	TSS	213120	213120	.	+	.	Name=TSS646
CADEHJ010000001.1	CrossMap	TSS	2108978	2108978	.	-	.	Name=TSS647
CADEHJ010000001.1	CrossMap	TSS	2109529	2109529	.	-	.	Name=TSS648
CADEHJ010000001.1	CrossMap	TSS	2110893	2110893	.	-	.	Name=TSS649
CADEHJ010000001.1	CrossMap	TSS	2114017	2114017	.	-	.	Name=TSS650
CADEHJ010000001.1	CrossMap	TSS	2114588	2114588	.	-	.	Name=TSS651
CADEHJ010000001.1	CrossMap	TSS	2115523	2115523	.	-	.	Name=TSS652
CADEHJ010000001.1	CrossMap	TSS	2124617	2124617	.	-	.	Name=TSS653
CADEHJ010000001.1	CrossMap	TSS	2125479	2125479	.	-	.	Name=TSS654
CADEHJ010000001.1	CrossMap	TSS	2127499	2127499	.	-	.	Name=TSS655
CADEHJ010000001.1	CrossMap	TSS	2128892	2128892	.	-	.	Name=TSS656
CADEHJ010000001.1	CrossMap	TSS	2131143	2131143	.	-	.	Name=TSS657
CADEHJ010000001.1	CrossMap	TSS	2133618	2133618	.	-	.	Name=TSS658
CADEHJ010000001.1	CrossMap	TSS	2135163	2135163	.	-	.	Name=TSS659
CADEHJ010000001.1	CrossMap	TSS	2137583	2137583	.	-	.	Name=TSS660
CADEHJ010000001.1	CrossMap	TSS	2139312	2139312	.	-	.	Name=TSS661
CADEHJ010000001.1	CrossMap	TSS	2140775	2140775	.	-	.	Name=TSS662
CADEHJ010000001.1	CrossMap	TSS	2143443	2143443	.	-	.	Name=TSS663
CADEHJ010000001.1	CrossMap	TSS	2143899	2143899	.	-	.	Name=TSS664
CADEHJ010000001.1	CrossMap	TSS	2144218	2144218	.	-	.	Name=TSS665
CADEHJ010000001.1	CrossMap	TSS	2144846	2144846	.	-	.	Name=TSS666
CADEHJ010000001.1	CrossMap	TSS	2144936	2144936	.	+	.	Name=TSS667
CADEHJ010000001.1	CrossMap	TSS	2146181	2146181	.	+	.	Name=TSS668
CADEHJ010000001.1	CrossMap	TSS	2150620	2150620	.	-	.	Name=TSS669
CADEHJ010000001.1	CrossMap	TSS	217493	217493	.	-	.	Name=TSS670
CADEHJ010000001.1	CrossMap	TSS	2151474	2151474	.	-	.	Name=TSS671
CADEHJ010000001.1	CrossMap	TSS	2152591	2152591	.	-	.	Name=TSS672
CADEHJ010000001.1	CrossMap	TSS	2153590	2153590	.	-	.	Name=TSS673
CADEHJ010000001.1	CrossMap	TSS	2153666	2153666	.	-	.	Name=TSS674
CADEHJ010000001.1	CrossMap	TSS	2153762	2153762	.	+	.	Name=TSS675
CADEHJ010000001.1	CrossMap	TSS	2154838	2154838	.	+	.	Name=TSS676
CADEHJ010000001.1	CrossMap	TSS	218228	218228	.	-	.	Name=TSS677
CADEHJ010000001.1	CrossMap	TSS	2158924	2158924	.	+	.	Name=TSS678
CADEHJ010000001.1	CrossMap	TSS	2159865	2159865	.	-	.	Name=TSS679
CADEHJ010000001.1	CrossMap	TSS	2161254	2161254	.	-	.	Name=TSS680
CADEHJ010000001.1	CrossMap	TSS	2163135	2163135	.	-	.	Name=TSS681
CADEHJ010000001.1	CrossMap	TSS	2163154	2163154	.	-	.	Name=TSS682
CADEHJ010000001.1	CrossMap	TSS	2163497	2163497	.	-	.	Name=TSS683
CADEHJ010000001.1	CrossMap	TSS	2165307	2165307	.	-	.	Name=TSS684
CADEHJ010000001.1	CrossMap	TSS	2165518	2165518	.	+	.	Name=TSS685
CADEHJ010000001.1	CrossMap	TSS	219257	219257	.	-	.	Name=TSS686
CADEHJ010000001.1	CrossMap	TSS	2169055	2169055	.	-	.	Name=TSS687
CADEHJ010000001.1	CrossMap	TSS	2170538	2170538	.	-	.	Name=TSS688
CADEHJ010000001.1	CrossMap	TSS	219488	219488	.	+	.	Name=TSS689
CADEHJ010000001.1	CrossMap	TSS	2171665	2171665	.	-	.	Name=TSS690
CADEHJ010000001.1	CrossMap	TSS	219602	219602	.	+	.	Name=TSS691
CADEHJ010000001.1	CrossMap	TSS	2172911	2172911	.	-	.	Name=TSS692
CADEHJ010000001.1	CrossMap	TSS	2173432	2173432	.	-	.	Name=TSS693
CADEHJ010000001.1	CrossMap	TSS	2174302	2174302	.	-	.	Name=TSS694
CADEHJ010000001.1	CrossMap	TSS	2175152	2175152	.	-	.	Name=TSS695
CADEHJ010000001.1	CrossMap	TSS	21302	21302	.	+	.	Name=TSS696
CADEHJ010000001.1	CrossMap	TSS	2223962	2223962	.	+	.	Name=TSS697
CADEHJ010000001.1	CrossMap	TSS	2225816	2225816	.	-	.	Name=TSS698
CADEHJ010000001.1	CrossMap	TSS	220216	220216	.	+	.	Name=TSS699
CADEHJ010000001.1	CrossMap	TSS	2229754	2229754	.	-	.	Name=TSS700
CADEHJ010000001.1	CrossMap	TSS	2230901	2230901	.	-	.	Name=TSS701
CADEHJ010000001.1	CrossMap	TSS	220859	220859	.	+	.	Name=TSS702
CADEHJ010000001.1	CrossMap	TSS	2233782	2233782	.	+	.	Name=TSS703
CADEHJ010000001.1	CrossMap	TSS	2234293	2234293	.	+	.	Name=TSS704
CADEHJ010000001.1	CrossMap	TSS	2236773	2236773	.	-	.	Name=TSS705
CADEHJ010000001.1	CrossMap	TSS	221578	221578	.	+	.	Name=TSS706
CADEHJ010000001.1	CrossMap	TSS	2243045	2243045	.	-	.	Name=TSS707
CADEHJ010000001.1	CrossMap	TSS	2243069	2243069	.	+	.	Name=TSS708
CADEHJ010000001.1	CrossMap	TSS	2245608	2245608	.	-	.	Name=TSS709
CADEHJ010000001.1	CrossMap	TSS	2245841	2245841	.	+	.	Name=TSS710
CADEHJ010000001.1	CrossMap	TSS	2248698	2248698	.	-	.	Name=TSS711
CADEHJ010000001.1	CrossMap	TSS	2249251	2249251	.	-	.	Name=TSS712
CADEHJ010000001.1	CrossMap	TSS	2253263	2253263	.	-	.	Name=TSS713
CADEHJ010000001.1	CrossMap	TSS	2254058	2254058	.	-	.	Name=TSS714
CADEHJ010000001.1	CrossMap	TSS	2254133	2254133	.	+	.	Name=TSS715
CADEHJ010000001.1	CrossMap	TSS	2254439	2254439	.	+	.	Name=TSS716
CADEHJ010000001.1	CrossMap	TSS	2255382	2255382	.	+	.	Name=TSS717
CADEHJ010000001.1	CrossMap	TSS	2256254	2256254	.	+	.	Name=TSS718
CADEHJ010000001.1	CrossMap	TSS	2260997	2260997	.	-	.	Name=TSS719
CADEHJ010000001.1	CrossMap	TSS	2263370	2263370	.	-	.	Name=TSS720
CADEHJ010000001.1	CrossMap	TSS	2270244	2270244	.	-	.	Name=TSS721
CADEHJ010000001.1	CrossMap	TSS	2272156	2272156	.	-	.	Name=TSS722
CADEHJ010000001.1	CrossMap	TSS	2272341	2272341	.	+	.	Name=TSS723
CADEHJ010000001.1	CrossMap	TSS	2274045	2274045	.	-	.	Name=TSS724
CADEHJ010000001.1	CrossMap	TSS	2274436	2274436	.	-	.	Name=TSS725
CADEHJ010000001.1	CrossMap	TSS	2274929	2274929	.	-	.	Name=TSS726
CADEHJ010000001.1	CrossMap	TSS	2277316	2277316	.	+	.	Name=TSS727
CADEHJ010000001.1	CrossMap	TSS	2277460	2277460	.	+	.	Name=TSS728
CADEHJ010000001.1	CrossMap	TSS	2278984	2278984	.	+	.	Name=TSS729
CADEHJ010000001.1	CrossMap	TSS	2285073	2285073	.	+	.	Name=TSS730
CADEHJ010000001.1	CrossMap	TSS	226383	226383	.	+	.	Name=TSS731
CADEHJ010000001.1	CrossMap	TSS	2288218	2288218	.	-	.	Name=TSS732
CADEHJ010000001.1	CrossMap	TSS	2289004	2289004	.	-	.	Name=TSS733
CADEHJ010000001.1	CrossMap	TSS	2289156	2289156	.	+	.	Name=TSS734
CADEHJ010000001.1	CrossMap	TSS	2291738	2291738	.	-	.	Name=TSS735
CADEHJ010000001.1	CrossMap	TSS	2292859	2292859	.	-	.	Name=TSS736
CADEHJ010000001.1	CrossMap	TSS	2293796	2293796	.	-	.	Name=TSS737
CADEHJ010000001.1	CrossMap	TSS	2293841	2293841	.	+	.	Name=TSS738
CADEHJ010000001.1	CrossMap	TSS	2294909	2294909	.	+	.	Name=TSS739
CADEHJ010000001.1	CrossMap	TSS	2295958	2295958	.	-	.	Name=TSS740
CADEHJ010000001.1	CrossMap	TSS	227221	227221	.	+	.	Name=TSS741
CADEHJ010000001.1	CrossMap	TSS	2296108	2296108	.	+	.	Name=TSS742
CADEHJ010000001.1	CrossMap	TSS	2298582	2298582	.	-	.	Name=TSS743
CADEHJ010000001.1	CrossMap	TSS	2301070	2301070	.	-	.	Name=TSS744
CADEHJ010000001.1	CrossMap	TSS	2301415	2301415	.	+	.	Name=TSS745
CADEHJ010000001.1	CrossMap	TSS	227794	227794	.	+	.	Name=TSS746
CADEHJ010000001.1	CrossMap	TSS	2303778	2303778	.	-	.	Name=TSS747
CADEHJ010000001.1	CrossMap	TSS	2304110	2304110	.	-	.	Name=TSS748
CADEHJ010000001.1	CrossMap	TSS	228272	228272	.	+	.	Name=TSS749
CADEHJ010000001.1	CrossMap	TSS	2312096	2312096	.	-	.	Name=TSS750
CADEHJ010000001.1	CrossMap	TSS	2312182	2312182	.	+	.	Name=TSS751
CADEHJ010000001.1	CrossMap	TSS	2318226	2318226	.	-	.	Name=TSS752
CADEHJ010000001.1	CrossMap	TSS	2319465	2319465	.	-	.	Name=TSS753
CADEHJ010000001.1	CrossMap	TSS	2320343	2320343	.	-	.	Name=TSS754
CADEHJ010000001.1	CrossMap	TSS	2321118	2321118	.	+	.	Name=TSS755
CADEHJ010000001.1	CrossMap	TSS	230439	230439	.	+	.	Name=TSS756
CADEHJ010000001.1	CrossMap	TSS	2336595	2336595	.	-	.	Name=TSS757
CADEHJ010000001.1	CrossMap	TSS	2339109	2339109	.	-	.	Name=TSS758
CADEHJ010000001.1	CrossMap	TSS	2341105	2341105	.	-	.	Name=TSS759
CADEHJ010000001.1	CrossMap	TSS	2341763	2341763	.	-	.	Name=TSS760
CADEHJ010000001.1	CrossMap	TSS	2342143	2342143	.	-	.	Name=TSS761
CADEHJ010000001.1	CrossMap	TSS	2342985	2342985	.	-	.	Name=TSS762
CADEHJ010000001.1	CrossMap	TSS	2344053	2344053	.	-	.	Name=TSS763
CADEHJ010000001.1	CrossMap	TSS	2344062	2344062	.	-	.	Name=TSS764
CADEHJ010000001.1	CrossMap	TSS	2345089	2345089	.	-	.	Name=TSS765
CADEHJ010000001.1	CrossMap	TSS	2345107	2345107	.	-	.	Name=TSS766
CADEHJ010000001.1	CrossMap	TSS	2348010	2348010	.	-	.	Name=TSS767
CADEHJ010000001.1	CrossMap	TSS	2348974	2348974	.	+	.	Name=TSS768
CADEHJ010000001.1	CrossMap	TSS	2350769	2350769	.	-	.	Name=TSS769
CADEHJ010000001.1	CrossMap	TSS	2351204	2351204	.	-	.	Name=TSS770
CADEHJ010000001.1	CrossMap	TSS	232812	232812	.	+	.	Name=TSS771
CADEHJ010000001.1	CrossMap	TSS	2352547	2352547	.	-	.	Name=TSS772
CADEHJ010000001.1	CrossMap	TSS	2353747	2353747	.	-	.	Name=TSS773
CADEHJ010000001.1	CrossMap	TSS	2355225	2355225	.	+	.	Name=TSS774
CADEHJ010000001.1	CrossMap	TSS	2356263	2356263	.	-	.	Name=TSS775
CADEHJ010000001.1	CrossMap	TSS	2358954	2358954	.	-	.	Name=TSS776
CADEHJ010000001.1	CrossMap	TSS	2359760	2359760	.	-	.	Name=TSS777
CADEHJ010000001.1	CrossMap	TSS	2360641	2360641	.	-	.	Name=TSS778
CADEHJ010000001.1	CrossMap	TSS	2361955	2361955	.	-	.	Name=TSS779
CADEHJ010000001.1	CrossMap	TSS	2364138	2364138	.	-	.	Name=TSS780
CADEHJ010000001.1	CrossMap	TSS	2364226	2364226	.	+	.	Name=TSS781
CADEHJ010000001.1	CrossMap	TSS	2366797	2366797	.	-	.	Name=TSS782
CADEHJ010000001.1	CrossMap	TSS	2366896	2366896	.	+	.	Name=TSS783
CADEHJ010000001.1	CrossMap	TSS	2367285	2367285	.	+	.	Name=TSS784
CADEHJ010000001.1	CrossMap	TSS	2367877	2367877	.	+	.	Name=TSS785
CADEHJ010000001.1	CrossMap	TSS	2368539	2368539	.	+	.	Name=TSS786
CADEHJ010000001.1	CrossMap	TSS	234607	234607	.	+	.	Name=TSS787
CADEHJ010000001.1	CrossMap	TSS	2370486	2370486	.	-	.	Name=TSS788
CADEHJ010000001.1	CrossMap	TSS	2374480	2374480	.	-	.	Name=TSS789
CADEHJ010000001.1	CrossMap	TSS	2374980	2374980	.	-	.	Name=TSS790
CADEHJ010000001.1	CrossMap	TSS	2377648	2377648	.	-	.	Name=TSS791
CADEHJ010000001.1	CrossMap	TSS	2379617	2379617	.	-	.	Name=TSS792
CADEHJ010000001.1	CrossMap	TSS	2381898	2381898	.	-	.	Name=TSS793
CADEHJ010000001.1	CrossMap	TSS	2382059	2382059	.	+	.	Name=TSS794
CADEHJ010000001.1	CrossMap	TSS	2383583	2383583	.	+	.	Name=TSS795
CADEHJ010000001.1	CrossMap	TSS	236443	236443	.	+	.	Name=TSS796
CADEHJ010000001.1	CrossMap	TSS	2394999	2394999	.	-	.	Name=TSS797
CADEHJ010000001.1	CrossMap	TSS	2395082	2395082	.	-	.	Name=TSS798
CADEHJ010000001.1	CrossMap	TSS	2395626	2395626	.	-	.	Name=TSS799
CADEHJ010000001.1	CrossMap	TSS	2395737	2395737	.	+	.	Name=TSS800
CADEHJ010000001.1	CrossMap	TSS	2399195	2399195	.	-	.	Name=TSS801
CADEHJ010000001.1	CrossMap	TSS	2399413	2399413	.	+	.	Name=TSS802
CADEHJ010000001.1	CrossMap	TSS	2405460	2405460	.	-	.	Name=TSS803
CADEHJ010000001.1	CrossMap	TSS	2406980	2406980	.	+	.	Name=TSS804
CADEHJ010000001.1	CrossMap	TSS	2407861	2407861	.	-	.	Name=TSS805
CADEHJ010000001.1	CrossMap	TSS	2408135	2408135	.	-	.	Name=TSS806
CADEHJ010000001.1	CrossMap	TSS	2408560	2408560	.	-	.	Name=TSS807
CADEHJ010000001.1	CrossMap	TSS	2409071	2409071	.	-	.	Name=TSS808
CADEHJ010000001.1	CrossMap	TSS	2410322	2410322	.	-	.	Name=TSS809
CADEHJ010000001.1	CrossMap	TSS	2411199	2411199	.	-	.	Name=TSS810
CADEHJ010000001.1	CrossMap	TSS	2411808	2411808	.	+	.	Name=TSS811
CADEHJ010000001.1	CrossMap	TSS	2412556	2412556	.	-	.	Name=TSS812
CADEHJ010000001.1	CrossMap	TSS	2413077	2413077	.	-	.	Name=TSS813
CADEHJ010000001.1	CrossMap	TSS	239288	239288	.	+	.	Name=TSS814
CADEHJ010000001.1	CrossMap	TSS	2418103	2418103	.	-	.	Name=TSS815
CADEHJ010000001.1	CrossMap	TSS	2421679	2421679	.	-	.	Name=TSS816
CADEHJ010000001.1	CrossMap	TSS	2422071	2422071	.	+	.	Name=TSS817
CADEHJ010000001.1	CrossMap	TSS	2422307	2422307	.	+	.	Name=TSS818
CADEHJ010000001.1	CrossMap	TSS	709455	709455	.	+	.	Name=TSS819
CADEHJ010000001.1	CrossMap	TSS	23659	23659	.	-	.	Name=TSS824
CADEHJ010000001.1	CrossMap	TSS	2423215	2423215	.	-	.	Name=TSS829
CADEHJ010000001.1	CrossMap	TSS	2426892	2426892	.	-	.	Name=TSS830
CADEHJ010000001.1	CrossMap	TSS	2427062	2427062	.	+	.	Name=TSS831
CADEHJ010000001.1	CrossMap	TSS	2428872	2428872	.	-	.	Name=TSS832
CADEHJ010000001.1	CrossMap	TSS	2431002	2431002	.	-	.	Name=TSS833
CADEHJ010000001.1	CrossMap	TSS	2431813	2431813	.	-	.	Name=TSS834
CADEHJ010000001.1	CrossMap	TSS	23830	23830	.	+	.	Name=TSS835
CADEHJ010000001.1	CrossMap	TSS	2438618	2438618	.	-	.	Name=TSS836
CADEHJ010000001.1	CrossMap	TSS	2441753	2441753	.	-	.	Name=TSS837
CADEHJ010000001.1	CrossMap	TSS	2444718	2444718	.	-	.	Name=TSS838
CADEHJ010000001.1	CrossMap	TSS	2446983	2446983	.	-	.	Name=TSS839
CADEHJ010000001.1	CrossMap	TSS	2447881	2447881	.	-	.	Name=TSS840
CADEHJ010000001.1	CrossMap	TSS	2451321	2451321	.	-	.	Name=TSS841
CADEHJ010000001.1	CrossMap	TSS	2454866	2454866	.	-	.	Name=TSS842
CADEHJ010000001.1	CrossMap	TSS	2456694	2456694	.	-	.	Name=TSS844
CADEHJ010000001.1	CrossMap	TSS	2456874	2456874	.	-	.	Name=TSS845
CADEHJ010000001.1	CrossMap	TSS	2456962	2456962	.	-	.	Name=TSS846
CADEHJ010000001.1	CrossMap	TSS	2457100	2457100	.	-	.	Name=TSS847
CADEHJ010000001.1	CrossMap	TSS	2457106	2457106	.	-	.	Name=TSS848
CADEHJ010000001.1	CrossMap	TSS	2457108	2457108	.	-	.	Name=TSS849
CADEHJ010000001.1	CrossMap	TSS	2457231	2457231	.	-	.	Name=TSS850
CADEHJ010000001.1	CrossMap	TSS	2457239	2457239	.	-	.	Name=TSS851
CADEHJ010000001.1	CrossMap	TSS	2457653	2457653	.	-	.	Name=TSS852
CADEHJ010000001.1	CrossMap	TSS	2464054	2464054	.	-	.	Name=TSS853
CADEHJ010000001.1	CrossMap	TSS	2465526	2465526	.	-	.	Name=TSS854
CADEHJ010000001.1	CrossMap	TSS	2466050	2466050	.	-	.	Name=TSS855
CADEHJ010000001.1	CrossMap	TSS	2466533	2466533	.	-	.	Name=TSS856
CADEHJ010000001.1	CrossMap	TSS	2466628	2466628	.	+	.	Name=TSS857
CADEHJ010000001.1	CrossMap	TSS	2467945	2467945	.	+	.	Name=TSS858
CADEHJ010000001.1	CrossMap	TSS	2470140	2470140	.	-	.	Name=TSS859
CADEHJ010000001.1	CrossMap	TSS	2470256	2470256	.	+	.	Name=TSS860
CADEHJ010000001.1	CrossMap	TSS	2472902	2472902	.	-	.	Name=TSS861
CADEHJ010000001.1	CrossMap	TSS	2474397	2474397	.	+	.	Name=TSS862
CADEHJ010000001.1	CrossMap	TSS	2481026	2481026	.	-	.	Name=TSS863
CADEHJ010000001.1	CrossMap	TSS	2481101	2481101	.	+	.	Name=TSS864
CADEHJ010000001.1	CrossMap	TSS	2481678	2481678	.	+	.	Name=TSS865
CADEHJ010000001.1	CrossMap	TSS	2483815	2483815	.	-	.	Name=TSS866
CADEHJ010000001.1	CrossMap	TSS	2485214	2485214	.	-	.	Name=TSS867
CADEHJ010000001.1	CrossMap	TSS	2485482	2485482	.	+	.	Name=TSS868
CADEHJ010000001.1	CrossMap	TSS	2486590	2486590	.	+	.	Name=TSS869
CADEHJ010000001.1	CrossMap	TSS	2487887	2487887	.	-	.	Name=TSS870
CADEHJ010000001.1	CrossMap	TSS	2488071	2488071	.	-	.	Name=TSS871
CADEHJ010000001.1	CrossMap	TSS	2491464	2491464	.	+	.	Name=TSS872
CADEHJ010000001.1	CrossMap	TSS	2491818	2491818	.	+	.	Name=TSS873
CADEHJ010000001.1	CrossMap	TSS	2493699	2493699	.	-	.	Name=TSS874
CADEHJ010000001.1	CrossMap	TSS	2495296	2495296	.	-	.	Name=TSS875
CADEHJ010000001.1	CrossMap	TSS	2495302	2495302	.	-	.	Name=TSS876
CADEHJ010000001.1	CrossMap	TSS	2495309	2495309	.	-	.	Name=TSS877
CADEHJ010000001.1	CrossMap	TSS	2495784	2495784	.	-	.	Name=TSS878
CADEHJ010000001.1	CrossMap	TSS	2496679	2496679	.	-	.	Name=TSS879
CADEHJ010000001.1	CrossMap	TSS	2496766	2496766	.	+	.	Name=TSS880
CADEHJ010000001.1	CrossMap	TSS	2498905	2498905	.	-	.	Name=TSS881
CADEHJ010000001.1	CrossMap	TSS	2500667	2500667	.	-	.	Name=TSS886
CADEHJ010000001.1	CrossMap	TSS	2500688	2500688	.	-	.	Name=TSS887
CADEHJ010000001.1	CrossMap	TSS	2501158	2501158	.	-	.	Name=TSS888
CADEHJ010000001.1	CrossMap	TSS	2502351	2502351	.	-	.	Name=TSS889
CADEHJ010000001.1	CrossMap	TSS	2502369	2502369	.	-	.	Name=TSS890
CADEHJ010000001.1	CrossMap	TSS	2502377	2502377	.	-	.	Name=TSS891
CADEHJ010000001.1	CrossMap	TSS	252302	252302	.	+	.	Name=TSS892
CADEHJ010000001.1	CrossMap	TSS	2504469	2504469	.	-	.	Name=TSS893
CADEHJ010000001.1	CrossMap	TSS	2504711	2504711	.	+	.	Name=TSS894
CADEHJ010000001.1	CrossMap	TSS	2506784	2506784	.	-	.	Name=TSS895
CADEHJ010000001.1	CrossMap	TSS	2507003	2507003	.	-	.	Name=TSS896
CADEHJ010000001.1	CrossMap	TSS	2508743	2508743	.	-	.	Name=TSS897
CADEHJ010000001.1	CrossMap	TSS	2510260	2510260	.	-	.	Name=TSS898
CADEHJ010000001.1	CrossMap	TSS	2512827	2512827	.	-	.	Name=TSS899
CADEHJ010000001.1	CrossMap	TSS	2512834	2512834	.	-	.	Name=TSS900
CADEHJ010000001.1	CrossMap	TSS	2513204	2513204	.	-	.	Name=TSS901
CADEHJ010000001.1	CrossMap	TSS	2514570	2514570	.	-	.	Name=TSS902
CADEHJ010000001.1	CrossMap	TSS	2514876	2514876	.	-	.	Name=TSS903
CADEHJ010000001.1	CrossMap	TSS	2518698	2518698	.	-	.	Name=TSS904
CADEHJ010000001.1	CrossMap	TSS	2518806	2518806	.	+	.	Name=TSS905
CADEHJ010000001.1	CrossMap	TSS	253933	253933	.	+	.	Name=TSS906
CADEHJ010000001.1	CrossMap	TSS	2521354	2521354	.	-	.	Name=TSS907
CADEHJ010000001.1	CrossMap	TSS	2522303	2522303	.	-	.	Name=TSS908
CADEHJ010000001.1	CrossMap	TSS	2522793	2522793	.	-	.	Name=TSS909
CADEHJ010000001.1	CrossMap	TSS	254391	254391	.	+	.	Name=TSS910
CADEHJ010000001.1	CrossMap	TSS	2523985	2523985	.	+	.	Name=TSS911
CADEHJ010000001.1	CrossMap	TSS	2525740	2525740	.	-	.	Name=TSS913
CADEHJ010000001.1	CrossMap	TSS	2526355	2526355	.	-	.	Name=TSS914
CADEHJ010000001.1	CrossMap	TSS	2526945	2526945	.	-	.	Name=TSS915
CADEHJ010000001.1	CrossMap	TSS	2537958	2537958	.	-	.	Name=TSS916
CADEHJ010000001.1	CrossMap	TSS	2539335	2539335	.	-	.	Name=TSS917
CADEHJ010000001.1	CrossMap	TSS	2540339	2540339	.	-	.	Name=TSS918
CADEHJ010000001.1	CrossMap	TSS	2540465	2540465	.	-	.	Name=TSS919
CADEHJ010000001.1	CrossMap	TSS	2541721	2541721	.	-	.	Name=TSS920
CADEHJ010000001.1	CrossMap	TSS	2542624	2542624	.	-	.	Name=TSS921
CADEHJ010000001.1	CrossMap	TSS	2543464	2543464	.	-	.	Name=TSS922
CADEHJ010000001.1	CrossMap	TSS	2543750	2543750	.	-	.	Name=TSS923
CADEHJ010000001.1	CrossMap	TSS	2545221	2545221	.	-	.	Name=TSS924
CADEHJ010000001.1	CrossMap	TSS	256752	256752	.	+	.	Name=TSS925
CADEHJ010000001.1	CrossMap	TSS	256978	256978	.	+	.	Name=TSS926
CADEHJ010000001.1	CrossMap	TSS	2549965	2549965	.	-	.	Name=TSS927
CADEHJ010000001.1	CrossMap	TSS	2551236	2551236	.	-	.	Name=TSS928
CADEHJ010000001.1	CrossMap	TSS	2552864	2552864	.	-	.	Name=TSS929
CADEHJ010000001.1	CrossMap	TSS	2553913	2553913	.	-	.	Name=TSS930
CADEHJ010000001.1	CrossMap	TSS	2557252	2557252	.	-	.	Name=TSS931
CADEHJ010000001.1	CrossMap	TSS	2558567	2558567	.	+	.	Name=TSS932
CADEHJ010000001.1	CrossMap	TSS	2601250	2601250	.	-	.	Name=TSS933
CADEHJ010000001.1	CrossMap	TSS	2601345	2601345	.	+	.	Name=TSS934
CADEHJ010000001.1	CrossMap	TSS	2603494	2603494	.	-	.	Name=TSS935
CADEHJ010000001.1	CrossMap	TSS	258441	258441	.	+	.	Name=TSS936
CADEHJ010000001.1	CrossMap	TSS	2608759	2608759	.	-	.	Name=TSS937
CADEHJ010000001.1	CrossMap	TSS	2611668	2611668	.	-	.	Name=TSS938
CADEHJ010000001.1	CrossMap	TSS	2612181	2612181	.	-	.	Name=TSS939
CADEHJ010000001.1	CrossMap	TSS	2612696	2612696	.	-	.	Name=TSS940
CADEHJ010000001.1	CrossMap	TSS	2613788	2613788	.	-	.	Name=TSS941
CADEHJ010000001.1	CrossMap	TSS	2615327	2615327	.	-	.	Name=TSS942
CADEHJ010000001.1	CrossMap	TSS	2615903	2615903	.	-	.	Name=TSS943
CADEHJ010000001.1	CrossMap	TSS	2618209	2618209	.	-	.	Name=TSS944
CADEHJ010000001.1	CrossMap	TSS	2618508	2618508	.	-	.	Name=TSS945
CADEHJ010000001.1	CrossMap	TSS	259778	259778	.	+	.	Name=TSS946
CADEHJ010000001.1	CrossMap	TSS	2620397	2620397	.	-	.	Name=TSS947
CADEHJ010000001.1	CrossMap	TSS	2620440	2620440	.	-	.	Name=TSS948
CADEHJ010000001.1	CrossMap	TSS	2621833	2621833	.	-	.	Name=TSS949
CADEHJ010000001.1	CrossMap	TSS	2626921	2626921	.	-	.	Name=TSS950
CADEHJ010000001.1	CrossMap	TSS	2628026	2628026	.	-	.	Name=TSS951
CADEHJ010000001.1	CrossMap	TSS	2628829	2628829	.	-	.	Name=TSS952
CADEHJ010000001.1	CrossMap	TSS	2636954	2636954	.	-	.	Name=TSS953
CADEHJ010000001.1	CrossMap	TSS	2639751	2639751	.	-	.	Name=TSS954
CADEHJ010000001.1	CrossMap	TSS	262352	262352	.	+	.	Name=TSS955
CADEHJ010000001.1	CrossMap	TSS	2645509	2645509	.	-	.	Name=TSS956
CADEHJ010000001.1	CrossMap	TSS	2649270	2649270	.	-	.	Name=TSS957
CADEHJ010000001.1	CrossMap	TSS	2650119	2650119	.	-	.	Name=TSS958
CADEHJ010000001.1	CrossMap	TSS	2652157	2652157	.	-	.	Name=TSS959
CADEHJ010000001.1	CrossMap	TSS	2654025	2654025	.	-	.	Name=TSS960
CADEHJ010000001.1	CrossMap	TSS	2655612	2655612	.	+	.	Name=TSS961
CADEHJ010000001.1	CrossMap	TSS	2659684	2659684	.	-	.	Name=TSS962
CADEHJ010000001.1	CrossMap	TSS	2660645	2660645	.	-	.	Name=TSS963
CADEHJ010000001.1	CrossMap	TSS	2663120	2663120	.	-	.	Name=TSS964
CADEHJ010000001.1	CrossMap	TSS	2664607	2664607	.	-	.	Name=TSS965
CADEHJ010000001.1	CrossMap	TSS	2665522	2665522	.	-	.	Name=TSS966
CADEHJ010000001.1	CrossMap	TSS	2668368	2668368	.	-	.	Name=TSS967
CADEHJ010000001.1	CrossMap	TSS	2669996	2669996	.	-	.	Name=TSS968
CADEHJ010000001.1	CrossMap	TSS	2670008	2670008	.	-	.	Name=TSS969
CADEHJ010000001.1	CrossMap	TSS	2670809	2670809	.	-	.	Name=TSS970
CADEHJ010000001.1	CrossMap	TSS	2672128	2672128	.	-	.	Name=TSS971
CADEHJ010000001.1	CrossMap	TSS	2674066	2674066	.	-	.	Name=TSS972
CADEHJ010000001.1	CrossMap	TSS	2674731	2674731	.	-	.	Name=TSS973
CADEHJ010000001.1	CrossMap	TSS	2676126	2676126	.	-	.	Name=TSS974
CADEHJ010000001.1	CrossMap	TSS	265617	265617	.	+	.	Name=TSS975
CADEHJ010000001.1	CrossMap	TSS	2677678	2677678	.	-	.	Name=TSS976
CADEHJ010000001.1	CrossMap	TSS	2678650	2678650	.	-	.	Name=TSS977
CADEHJ010000001.1	CrossMap	TSS	265864	265864	.	+	.	Name=TSS978
CADEHJ010000001.1	CrossMap	TSS	2680495	2680495	.	-	.	Name=TSS979
CADEHJ010000001.1	CrossMap	TSS	2682004	2682004	.	-	.	Name=TSS980
CADEHJ010000001.1	CrossMap	TSS	2683862	2683862	.	-	.	Name=TSS981
CADEHJ010000001.1	CrossMap	TSS	2684317	2684317	.	-	.	Name=TSS982
CADEHJ010000001.1	CrossMap	TSS	2685772	2685772	.	-	.	Name=TSS983
CADEHJ010000001.1	CrossMap	TSS	2688494	2688494	.	-	.	Name=TSS984
CADEHJ010000001.1	CrossMap	TSS	2692003	2692003	.	-	.	Name=TSS985
CADEHJ010000001.1	CrossMap	TSS	267106	267106	.	+	.	Name=TSS986
CADEHJ010000001.1	CrossMap	TSS	2693237	2693237	.	-	.	Name=TSS987
CADEHJ010000001.1	CrossMap	TSS	2694251	2694251	.	-	.	Name=TSS988
CADEHJ010000001.1	CrossMap	TSS	2694489	2694489	.	+	.	Name=TSS989
CADEHJ010000001.1	CrossMap	TSS	267554	267554	.	+	.	Name=TSS990
CADEHJ010000001.1	CrossMap	TSS	2697055	2697055	.	+	.	Name=TSS991
CADEHJ010000001.1	CrossMap	TSS	2699164	2699164	.	-	.	Name=TSS992
CADEHJ010000001.1	CrossMap	TSS	2699906	2699906	.	-	.	Name=TSS993
CADEHJ010000001.1	CrossMap	TSS	2702360	2702360	.	-	.	Name=TSS994
CADEHJ010000001.1	CrossMap	TSS	2703103	2703103	.	+	.	Name=TSS995
CADEHJ010000001.1	CrossMap	TSS	2705736	2705736	.	-	.	Name=TSS996
CADEHJ010000001.1	CrossMap	TSS	2708281	2708281	.	-	.	Name=TSS997
CADEHJ010000001.1	CrossMap	TSS	268745	268745	.	+	.	Name=TSS998
CADEHJ010000001.1	CrossMap	TSS	2708974	2708974	.	-	.	Name=TSS999
CADEHJ010000001.1	CrossMap	TSS	2711146	2711146	.	-	.	Name=TSS1000
CADEHJ010000001.1	CrossMap	TSS	2711523	2711523	.	-	.	Name=TSS1001
CADEHJ010000001.1	CrossMap	TSS	2712498	2712498	.	-	.	Name=TSS1002
CADEHJ010000001.1	CrossMap	TSS	2718262	2718262	.	-	.	Name=TSS1003
CADEHJ010000001.1	CrossMap	TSS	2721564	2721564	.	-	.	Name=TSS1004
CADEHJ010000001.1	CrossMap	TSS	270037	270037	.	+	.	Name=TSS1005
CADEHJ010000001.1	CrossMap	TSS	2723701	2723701	.	-	.	Name=TSS1006
CADEHJ010000001.1	CrossMap	TSS	2728067	2728067	.	-	.	Name=TSS1007
CADEHJ010000001.1	CrossMap	TSS	2728210	2728210	.	+	.	Name=TSS1008
CADEHJ010000001.1	CrossMap	TSS	2730937	2730937	.	-	.	Name=TSS1009
CADEHJ010000001.1	CrossMap	TSS	271303	271303	.	+	.	Name=TSS1011
CADEHJ010000001.1	CrossMap	TSS	2777551	2777551	.	-	.	Name=TSS1012
CADEHJ010000001.1	CrossMap	TSS	2777758	2777758	.	+	.	Name=TSS1013
CADEHJ010000001.1	CrossMap	TSS	2780676	2780676	.	-	.	Name=TSS1014
CADEHJ010000001.1	CrossMap	TSS	2781180	2781180	.	-	.	Name=TSS1015
CADEHJ010000001.1	CrossMap	TSS	2790577	2790577	.	-	.	Name=TSS1016
CADEHJ010000001.1	CrossMap	TSS	2790604	2790604	.	-	.	Name=TSS1017
CADEHJ010000001.1	CrossMap	TSS	2790613	2790613	.	-	.	Name=TSS1018
CADEHJ010000001.1	CrossMap	TSS	2791163	2791163	.	-	.	Name=TSS1019
CADEHJ010000001.1	CrossMap	TSS	2794487	2794487	.	-	.	Name=TSS1020
CADEHJ010000001.1	CrossMap	TSS	2795339	2795339	.	+	.	Name=TSS1021
CADEHJ010000001.1	CrossMap	TSS	2797417	2797417	.	-	.	Name=TSS1022
CADEHJ010000001.1	CrossMap	TSS	2798974	2798974	.	-	.	Name=TSS1023
CADEHJ010000001.1	CrossMap	TSS	2799494	2799494	.	-	.	Name=TSS1024
CADEHJ010000001.1	CrossMap	TSS	2799883	2799883	.	-	.	Name=TSS1025
CADEHJ010000001.1	CrossMap	TSS	2799889	2799889	.	-	.	Name=TSS1026
CADEHJ010000001.1	CrossMap	TSS	2799895	2799895	.	-	.	Name=TSS1027
CADEHJ010000001.1	CrossMap	TSS	2800340	2800340	.	-	.	Name=TSS1028
CADEHJ010000001.1	CrossMap	TSS	2802734	2802734	.	-	.	Name=TSS1029
CADEHJ010000001.1	CrossMap	TSS	2802746	2802746	.	-	.	Name=TSS1030
CADEHJ010000001.1	CrossMap	TSS	2803180	2803180	.	-	.	Name=TSS1031
CADEHJ010000001.1	CrossMap	TSS	2803416	2803416	.	-	.	Name=TSS1032
CADEHJ010000001.1	CrossMap	TSS	2803423	2803423	.	-	.	Name=TSS1033
CADEHJ010000001.1	CrossMap	TSS	2803921	2803921	.	-	.	Name=TSS1034
CADEHJ010000001.1	CrossMap	TSS	2804307	2804307	.	-	.	Name=TSS1035
CADEHJ010000001.1	CrossMap	TSS	2804326	2804326	.	-	.	Name=TSS1036
CADEHJ010000001.1	CrossMap	TSS	2804878	2804878	.	-	.	Name=TSS1037
CADEHJ010000001.1	CrossMap	TSS	2805318	2805318	.	-	.	Name=TSS1038
CADEHJ010000001.1	CrossMap	TSS	2805521	2805521	.	-	.	Name=TSS1039
CADEHJ010000001.1	CrossMap	TSS	2805531	2805531	.	-	.	Name=TSS1040
CADEHJ010000001.1	CrossMap	TSS	2806095	2806095	.	-	.	Name=TSS1041
CADEHJ010000001.1	CrossMap	TSS	2806116	2806116	.	-	.	Name=TSS1042
CADEHJ010000001.1	CrossMap	TSS	2806883	2806883	.	-	.	Name=TSS1043
CADEHJ010000001.1	CrossMap	TSS	2807189	2807189	.	-	.	Name=TSS1044
CADEHJ010000001.1	CrossMap	TSS	2807397	2807397	.	-	.	Name=TSS1045
CADEHJ010000001.1	CrossMap	TSS	2808487	2808487	.	-	.	Name=TSS1046
CADEHJ010000001.1	CrossMap	TSS	2808841	2808841	.	-	.	Name=TSS1047
CADEHJ010000001.1	CrossMap	TSS	2808857	2808857	.	-	.	Name=TSS1048
CADEHJ010000001.1	CrossMap	TSS	2809192	2809192	.	-	.	Name=TSS1049
CADEHJ010000001.1	CrossMap	TSS	271597	271597	.	+	.	Name=TSS1050
CADEHJ010000001.1	CrossMap	TSS	2810066	2810066	.	-	.	Name=TSS1051
CADEHJ010000001.1	CrossMap	TSS	2810411	2810411	.	-	.	Name=TSS1052
CADEHJ010000001.1	CrossMap	TSS	2811011	2811011	.	-	.	Name=TSS1053
CADEHJ010000001.1	CrossMap	TSS	2812161	2812161	.	-	.	Name=TSS1054
CADEHJ010000001.1	CrossMap	TSS	2815321	2815321	.	-	.	Name=TSS1055
CADEHJ010000001.1	CrossMap	TSS	2816440	2816440	.	-	.	Name=TSS1056
CADEHJ010000001.1	CrossMap	TSS	2816722	2816722	.	+	.	Name=TSS1057
CADEHJ010000001.1	CrossMap	TSS	2818829	2818829	.	+	.	Name=TSS1058
CADEHJ010000001.1	CrossMap	TSS	2824185	2824185	.	-	.	Name=TSS1059
CADEHJ010000001.1	CrossMap	TSS	2829568	2829568	.	-	.	Name=TSS1060
CADEHJ010000001.1	CrossMap	TSS	2831828	2831828	.	-	.	Name=TSS1061
CADEHJ010000001.1	CrossMap	TSS	2833195	2833195	.	-	.	Name=TSS1062
CADEHJ010000001.1	CrossMap	TSS	281926	281926	.	+	.	Name=TSS1063
CADEHJ010000001.1	CrossMap	TSS	2835376	2835376	.	-	.	Name=TSS1064
CADEHJ010000001.1	CrossMap	TSS	2835889	2835889	.	-	.	Name=TSS1065
CADEHJ010000001.1	CrossMap	TSS	2835896	2835896	.	-	.	Name=TSS1066
CADEHJ010000001.1	CrossMap	TSS	2836433	2836433	.	-	.	Name=TSS1067
CADEHJ010000001.1	CrossMap	TSS	2838352	2838352	.	-	.	Name=TSS1068
CADEHJ010000001.1	CrossMap	TSS	2838410	2838410	.	-	.	Name=TSS1069
CADEHJ010000001.1	CrossMap	TSS	2848902	2848902	.	-	.	Name=TSS1070
CADEHJ010000001.1	CrossMap	TSS	2850101	2850101	.	-	.	Name=TSS1071
CADEHJ010000001.1	CrossMap	TSS	2850882	2850882	.	-	.	Name=TSS1072
CADEHJ010000001.1	CrossMap	TSS	2851736	2851736	.	-	.	Name=TSS1073
CADEHJ010000001.1	CrossMap	TSS	2851804	2851804	.	+	.	Name=TSS1074
CADEHJ010000001.1	CrossMap	TSS	2852324	2852324	.	+	.	Name=TSS1075
CADEHJ010000001.1	CrossMap	TSS	2852960	2852960	.	+	.	Name=TSS1076
CADEHJ010000001.1	CrossMap	TSS	2855477	2855477	.	-	.	Name=TSS1077
CADEHJ010000001.1	CrossMap	TSS	27180	27180	.	+	.	Name=TSS1078
CADEHJ010000001.1	CrossMap	TSS	2863502	2863502	.	+	.	Name=TSS1079
CADEHJ010000001.1	CrossMap	TSS	2863882	2863882	.	+	.	Name=TSS1080
CADEHJ010000001.1	CrossMap	TSS	2866636	2866636	.	-	.	Name=TSS1081
CADEHJ010000001.1	CrossMap	TSS	2872051	2872051	.	-	.	Name=TSS1082
CADEHJ010000001.1	CrossMap	TSS	2872733	2872733	.	-	.	Name=TSS1083
CADEHJ010000001.1	CrossMap	TSS	2872828	2872828	.	+	.	Name=TSS1084
CADEHJ010000001.1	CrossMap	TSS	2875229	2875229	.	-	.	Name=TSS1085
CADEHJ010000001.1	CrossMap	TSS	2875964	2875964	.	-	.	Name=TSS1086
CADEHJ010000001.1	CrossMap	TSS	2877389	2877389	.	-	.	Name=TSS1087
CADEHJ010000001.1	CrossMap	TSS	2877516	2877516	.	+	.	Name=TSS1088
CADEHJ010000001.1	CrossMap	TSS	2881541	2881541	.	+	.	Name=TSS1089
CADEHJ010000001.1	CrossMap	TSS	2881716	2881716	.	+	.	Name=TSS1090
CADEHJ010000001.1	CrossMap	TSS	2882741	2882741	.	-	.	Name=TSS1091
CADEHJ010000001.1	CrossMap	TSS	2883340	2883340	.	-	.	Name=TSS1092
CADEHJ010000001.1	CrossMap	TSS	2883762	2883762	.	-	.	Name=TSS1093
CADEHJ010000001.1	CrossMap	TSS	2883773	2883773	.	-	.	Name=TSS1094
CADEHJ010000001.1	CrossMap	TSS	2885540	2885540	.	-	.	Name=TSS1095
CADEHJ010000001.1	CrossMap	TSS	2886326	2886326	.	-	.	Name=TSS1096
CADEHJ010000001.1	CrossMap	TSS	2886740	2886740	.	-	.	Name=TSS1097
CADEHJ010000001.1	CrossMap	TSS	2888436	2888436	.	-	.	Name=TSS1098
CADEHJ010000001.1	CrossMap	TSS	2888628	2888628	.	+	.	Name=TSS1099
CADEHJ010000001.1	CrossMap	TSS	2890226	2890226	.	-	.	Name=TSS1100
CADEHJ010000001.1	CrossMap	TSS	2890299	2890299	.	+	.	Name=TSS1101
CADEHJ010000001.1	CrossMap	TSS	2892268	2892268	.	-	.	Name=TSS1102
CADEHJ010000001.1	CrossMap	TSS	2894312	2894312	.	-	.	Name=TSS1103
CADEHJ010000001.1	CrossMap	TSS	2897923	2897923	.	-	.	Name=TSS1104
CADEHJ010000001.1	CrossMap	TSS	2897934	2897934	.	-	.	Name=TSS1105
CADEHJ010000001.1	CrossMap	TSS	2898085	2898085	.	-	.	Name=TSS1106
CADEHJ010000001.1	CrossMap	TSS	2900505	2900505	.	-	.	Name=TSS1107
CADEHJ010000001.1	CrossMap	TSS	2901179	2901179	.	-	.	Name=TSS1108
CADEHJ010000001.1	CrossMap	TSS	2901285	2901285	.	+	.	Name=TSS1109
CADEHJ010000001.1	CrossMap	TSS	288861	288861	.	+	.	Name=TSS1110
CADEHJ010000001.1	CrossMap	TSS	2903707	2903707	.	-	.	Name=TSS1111
CADEHJ010000001.1	CrossMap	TSS	2903731	2903731	.	+	.	Name=TSS1112
CADEHJ010000001.1	CrossMap	TSS	2903989	2903989	.	+	.	Name=TSS1113
CADEHJ010000001.1	CrossMap	TSS	2904528	2904528	.	+	.	Name=TSS1114
CADEHJ010000001.1	CrossMap	TSS	2905505	2905505	.	-	.	Name=TSS1115
CADEHJ010000001.1	CrossMap	TSS	2907384	2907384	.	-	.	Name=TSS1116
CADEHJ010000001.1	CrossMap	TSS	2907481	2907481	.	+	.	Name=TSS1117
CADEHJ010000001.1	CrossMap	TSS	289545	289545	.	+	.	Name=TSS1118
CADEHJ010000001.1	CrossMap	TSS	2910389	2910389	.	-	.	Name=TSS1119
CADEHJ010000001.1	CrossMap	TSS	2911226	2911226	.	-	.	Name=TSS1120
CADEHJ010000001.1	CrossMap	TSS	2911325	2911325	.	+	.	Name=TSS1121
CADEHJ010000001.1	CrossMap	TSS	290142	290142	.	+	.	Name=TSS1122
CADEHJ010000001.1	CrossMap	TSS	2921284	2921284	.	-	.	Name=TSS1123
CADEHJ010000001.1	CrossMap	TSS	2923520	2923520	.	-	.	Name=TSS1124
CADEHJ010000001.1	CrossMap	TSS	2924659	2924659	.	-	.	Name=TSS1125
CADEHJ010000001.1	CrossMap	TSS	2925741	2925741	.	+	.	Name=TSS1126
CADEHJ010000001.1	CrossMap	TSS	2926649	2926649	.	+	.	Name=TSS1127
CADEHJ010000001.1	CrossMap	TSS	2928581	2928581	.	-	.	Name=TSS1128
CADEHJ010000001.1	CrossMap	TSS	2929408	2929408	.	-	.	Name=TSS1129
CADEHJ010000001.1	CrossMap	TSS	2929896	2929896	.	-	.	Name=TSS1130
CADEHJ010000001.1	CrossMap	TSS	2936172	2936172	.	+	.	Name=TSS1131
CADEHJ010000001.1	CrossMap	TSS	2943732	2943732	.	-	.	Name=TSS1132
CADEHJ010000001.1	CrossMap	TSS	2945498	2945498	.	-	.	Name=TSS1133
CADEHJ010000001.1	CrossMap	TSS	2946169	2946169	.	-	.	Name=TSS1134
CADEHJ010000001.1	CrossMap	TSS	2948287	2948287	.	+	.	Name=TSS1135
CADEHJ010000001.1	CrossMap	TSS	2954284	2954284	.	-	.	Name=TSS1137
CADEHJ010000001.1	CrossMap	TSS	2955490	2955490	.	-	.	Name=TSS1138
CADEHJ010000001.1	CrossMap	TSS	2955500	2955500	.	-	.	Name=TSS1139
CADEHJ010000001.1	CrossMap	TSS	2956388	2956388	.	-	.	Name=TSS1140
CADEHJ010000001.1	CrossMap	TSS	2963244	2963244	.	-	.	Name=TSS1141
CADEHJ010000001.1	CrossMap	TSS	2964062	2964062	.	+	.	Name=TSS1142
CADEHJ010000001.1	CrossMap	TSS	2967509	2967509	.	-	.	Name=TSS1143
CADEHJ010000001.1	CrossMap	TSS	2973930	2973930	.	-	.	Name=TSS1144
CADEHJ010000001.1	CrossMap	TSS	2975630	2975630	.	-	.	Name=TSS1145
CADEHJ010000001.1	CrossMap	TSS	2979456	2979456	.	-	.	Name=TSS1146
CADEHJ010000001.1	CrossMap	TSS	2979587	2979587	.	-	.	Name=TSS1147
CADEHJ010000001.1	CrossMap	TSS	2979951	2979951	.	-	.	Name=TSS1148
CADEHJ010000001.1	CrossMap	TSS	298887	298887	.	+	.	Name=TSS1149
CADEHJ010000001.1	CrossMap	TSS	2981596	2981596	.	-	.	Name=TSS1150
CADEHJ010000001.1	CrossMap	TSS	2982553	2982553	.	-	.	Name=TSS1151
CADEHJ010000001.1	CrossMap	TSS	2983085	2983085	.	-	.	Name=TSS1152
CADEHJ010000001.1	CrossMap	TSS	2983922	2983922	.	-	.	Name=TSS1153
CADEHJ010000001.1	CrossMap	TSS	299286	299286	.	+	.	Name=TSS1154
CADEHJ010000001.1	CrossMap	TSS	2985040	2985040	.	-	.	Name=TSS1155
CADEHJ010000001.1	CrossMap	TSS	2990128	2990128	.	-	.	Name=TSS1156
CADEHJ010000001.1	CrossMap	TSS	300181	300181	.	+	.	Name=TSS1159
CADEHJ010000001.1	CrossMap	TSS	28647	28647	.	+	.	Name=TSS1161
CADEHJ010000001.1	CrossMap	TSS	2996060	2996060	.	-	.	Name=TSS1162
CADEHJ010000001.1	CrossMap	TSS	2996134	2996134	.	+	.	Name=TSS1163
CADEHJ010000001.1	CrossMap	TSS	3002111	3002111	.	-	.	Name=TSS1164
CADEHJ010000001.1	CrossMap	TSS	301629	301629	.	+	.	Name=TSS1165
CADEHJ010000001.1	CrossMap	TSS	3004637	3004637	.	-	.	Name=TSS1166
CADEHJ010000001.1	CrossMap	TSS	3009950	3009950	.	-	.	Name=TSS1167
CADEHJ010000001.1	CrossMap	TSS	3011562	3011562	.	-	.	Name=TSS1168
CADEHJ010000001.1	CrossMap	TSS	3013344	3013344	.	-	.	Name=TSS1169
CADEHJ010000001.1	CrossMap	TSS	3013775	3013775	.	-	.	Name=TSS1170
CADEHJ010000001.1	CrossMap	TSS	3014943	3014943	.	-	.	Name=TSS1171
CADEHJ010000001.1	CrossMap	TSS	3016901	3016901	.	-	.	Name=TSS1172
CADEHJ010000001.1	CrossMap	TSS	3026784	3026784	.	-	.	Name=TSS1173
CADEHJ010000001.1	CrossMap	TSS	3026924	3026924	.	+	.	Name=TSS1174
CADEHJ010000001.1	CrossMap	TSS	3030833	3030833	.	-	.	Name=TSS1175
CADEHJ010000001.1	CrossMap	TSS	3030933	3030933	.	+	.	Name=TSS1176
CADEHJ010000001.1	CrossMap	TSS	3037688	3037688	.	+	.	Name=TSS1177
CADEHJ010000001.1	CrossMap	TSS	3039916	3039916	.	-	.	Name=TSS1178
CADEHJ010000001.1	CrossMap	TSS	3039924	3039924	.	-	.	Name=TSS1179
CADEHJ010000001.1	CrossMap	TSS	3041038	3041038	.	-	.	Name=TSS1180
CADEHJ010000001.1	CrossMap	TSS	3041416	3041416	.	-	.	Name=TSS1181
CADEHJ010000001.1	CrossMap	TSS	3042041	3042041	.	-	.	Name=TSS1182
CADEHJ010000001.1	CrossMap	TSS	306387	306387	.	-	.	Name=TSS1183
CADEHJ010000001.1	CrossMap	TSS	307304	307304	.	-	.	Name=TSS1184
CADEHJ010000001.1	CrossMap	TSS	307383	307383	.	+	.	Name=TSS1185
CADEHJ010000001.1	CrossMap	TSS	308721	308721	.	-	.	Name=TSS1186
CADEHJ010000001.1	CrossMap	TSS	309847	309847	.	-	.	Name=TSS1187
CADEHJ010000001.1	CrossMap	TSS	310577	310577	.	-	.	Name=TSS1188
CADEHJ010000001.1	CrossMap	TSS	310633	310633	.	+	.	Name=TSS1189
CADEHJ010000001.1	CrossMap	TSS	311115	311115	.	+	.	Name=TSS1190
CADEHJ010000001.1	CrossMap	TSS	312809	312809	.	-	.	Name=TSS1191
CADEHJ010000001.1	CrossMap	TSS	313037	313037	.	+	.	Name=TSS1192
CADEHJ010000001.1	CrossMap	TSS	317658	317658	.	-	.	Name=TSS1193
CADEHJ010000001.1	CrossMap	TSS	320465	320465	.	-	.	Name=TSS1194
CADEHJ010000001.1	CrossMap	TSS	320590	320590	.	+	.	Name=TSS1195
CADEHJ010000001.1	CrossMap	TSS	30748	30748	.	+	.	Name=TSS1196
CADEHJ010000001.1	CrossMap	TSS	321874	321874	.	+	.	Name=TSS1197
CADEHJ010000001.1	CrossMap	TSS	322876	322876	.	+	.	Name=TSS1198
CADEHJ010000001.1	CrossMap	TSS	327916	327916	.	+	.	Name=TSS1200
CADEHJ010000001.1	CrossMap	TSS	330106	330106	.	+	.	Name=TSS1201
CADEHJ010000001.1	CrossMap	TSS	35945	35945	.	+	.	Name=TSS1202
CADEHJ010000001.1	CrossMap	TSS	335115	335115	.	-	.	Name=TSS1203
CADEHJ010000001.1	CrossMap	TSS	338558	338558	.	-	.	Name=TSS1204
CADEHJ010000001.1	CrossMap	TSS	344983	344983	.	+	.	Name=TSS1205
CADEHJ010000001.1	CrossMap	TSS	345287	345287	.	+	.	Name=TSS1206
CADEHJ010000001.1	CrossMap	TSS	346060	346060	.	+	.	Name=TSS1207
CADEHJ010000001.1	CrossMap	TSS	349800	349800	.	+	.	Name=TSS1209
CADEHJ010000001.1	CrossMap	TSS	38268	38268	.	-	.	Name=TSS1210
CADEHJ010000001.1	CrossMap	TSS	38379	38379	.	+	.	Name=TSS1211
CADEHJ010000001.1	CrossMap	TSS	356024	356024	.	+	.	Name=TSS1212
CADEHJ010000001.1	CrossMap	TSS	358170	358170	.	-	.	Name=TSS1213
CADEHJ010000001.1	CrossMap	TSS	358275	358275	.	+	.	Name=TSS1214
CADEHJ010000001.1	CrossMap	TSS	358930	358930	.	+	.	Name=TSS1215
CADEHJ010000001.1	CrossMap	TSS	361069	361069	.	+	.	Name=TSS1216
CADEHJ010000001.1	CrossMap	TSS	369417	369417	.	+	.	Name=TSS1219
CADEHJ010000001.1	CrossMap	TSS	374912	374912	.	+	.	Name=TSS1220
CADEHJ010000001.1	CrossMap	TSS	375665	375665	.	+	.	Name=TSS1221
CADEHJ010000001.1	CrossMap	TSS	377077	377077	.	+	.	Name=TSS1222
CADEHJ010000001.1	CrossMap	TSS	379981	379981	.	-	.	Name=TSS1224
CADEHJ010000001.1	CrossMap	TSS	387707	387707	.	-	.	Name=TSS1225
CADEHJ010000001.1	CrossMap	TSS	387811	387811	.	+	.	Name=TSS1226
CADEHJ010000001.1	CrossMap	TSS	390692	390692	.	-	.	Name=TSS1227
CADEHJ010000001.1	CrossMap	TSS	390848	390848	.	+	.	Name=TSS1228
CADEHJ010000001.1	CrossMap	TSS	392546	392546	.	+	.	Name=TSS1229
CADEHJ010000001.1	CrossMap	TSS	393770	393770	.	+	.	Name=TSS1230
CADEHJ010000001.1	CrossMap	TSS	395676	395676	.	+	.	Name=TSS1231
CADEHJ010000001.1	CrossMap	TSS	398646	398646	.	-	.	Name=TSS1232
CADEHJ010000001.1	CrossMap	TSS	402880	402880	.	+	.	Name=TSS1233
CADEHJ010000001.1	CrossMap	TSS	403476	403476	.	+	.	Name=TSS1234
CADEHJ010000001.1	CrossMap	TSS	404243	404243	.	+	.	Name=TSS1235
CADEHJ010000001.1	CrossMap	TSS	405386	405386	.	-	.	Name=TSS1236
CADEHJ010000001.1	CrossMap	TSS	408674	408674	.	+	.	Name=TSS1237
CADEHJ010000001.1	CrossMap	TSS	409902	409902	.	-	.	Name=TSS1238
CADEHJ010000001.1	CrossMap	TSS	409912	409912	.	+	.	Name=TSS1239
CADEHJ010000001.1	CrossMap	TSS	44423	44423	.	+	.	Name=TSS1240
CADEHJ010000001.1	CrossMap	TSS	413893	413893	.	+	.	Name=TSS1241
CADEHJ010000001.1	CrossMap	TSS	419269	419269	.	+	.	Name=TSS1242
CADEHJ010000001.1	CrossMap	TSS	419406	419406	.	+	.	Name=TSS1243
CADEHJ010000001.1	CrossMap	TSS	419735	419735	.	+	.	Name=TSS1244
CADEHJ010000001.1	CrossMap	TSS	421304	421304	.	-	.	Name=TSS1245
CADEHJ010000001.1	CrossMap	TSS	421370	421370	.	+	.	Name=TSS1246
CADEHJ010000001.1	CrossMap	TSS	422209	422209	.	+	.	Name=TSS1247
CADEHJ010000001.1	CrossMap	TSS	424086	424086	.	+	.	Name=TSS1248
CADEHJ010000001.1	CrossMap	TSS	426107	426107	.	-	.	Name=TSS1249
CADEHJ010000001.1	CrossMap	TSS	426181	426181	.	+	.	Name=TSS1250
CADEHJ010000001.1	CrossMap	TSS	426821	426821	.	+	.	Name=TSS1251
CADEHJ010000001.1	CrossMap	TSS	433475	433475	.	+	.	Name=TSS1252
CADEHJ010000001.1	CrossMap	TSS	434383	434383	.	+	.	Name=TSS1253
CADEHJ010000001.1	CrossMap	TSS	435862	435862	.	+	.	Name=TSS1254
CADEHJ010000001.1	CrossMap	TSS	443158	443158	.	-	.	Name=TSS1255
CADEHJ010000001.1	CrossMap	TSS	443444	443444	.	+	.	Name=TSS1256
CADEHJ010000001.1	CrossMap	TSS	444750	444750	.	+	.	Name=TSS1257
CADEHJ010000001.1	CrossMap	TSS	446293	446293	.	+	.	Name=TSS1258
CADEHJ010000001.1	CrossMap	TSS	447311	447311	.	-	.	Name=TSS1259
CADEHJ010000001.1	CrossMap	TSS	447965	447965	.	-	.	Name=TSS1260
CADEHJ010000001.1	CrossMap	TSS	448041	448041	.	+	.	Name=TSS1261
CADEHJ010000001.1	CrossMap	TSS	448979	448979	.	-	.	Name=TSS1262
CADEHJ010000001.1	CrossMap	TSS	451182	451182	.	-	.	Name=TSS1263
CADEHJ010000001.1	CrossMap	TSS	451677	451677	.	-	.	Name=TSS1264
CADEHJ010000001.1	CrossMap	TSS	452241	452241	.	-	.	Name=TSS1265
CADEHJ010000001.1	CrossMap	TSS	452353	452353	.	+	.	Name=TSS1266
CADEHJ010000001.1	CrossMap	TSS	454801	454801	.	+	.	Name=TSS1267
CADEHJ010000001.1	CrossMap	TSS	459784	459784	.	-	.	Name=TSS1268
CADEHJ010000001.1	CrossMap	TSS	459820	459820	.	+	.	Name=TSS1269
CADEHJ010000001.1	CrossMap	TSS	49084	49084	.	+	.	Name=TSS1270
CADEHJ010000001.1	CrossMap	TSS	461647	461647	.	+	.	Name=TSS1271
CADEHJ010000001.1	CrossMap	TSS	464335	464335	.	+	.	Name=TSS1272
CADEHJ010000001.1	CrossMap	TSS	4294	4294	.	+	.	Name=TSS1273
CADEHJ010000001.1	CrossMap	TSS	49910	49910	.	+	.	Name=TSS1274
CADEHJ010000001.1	CrossMap	TSS	469930	469930	.	+	.	Name=TSS1275
CADEHJ010000001.1	CrossMap	TSS	472326	472326	.	-	.	Name=TSS1276
CADEHJ010000001.1	CrossMap	TSS	472574	472574	.	-	.	Name=TSS1277
CADEHJ010000001.1	CrossMap	TSS	472698	472698	.	+	.	Name=TSS1278
CADEHJ010000001.1	CrossMap	TSS	473142	473142	.	+	.	Name=TSS1279
CADEHJ010000001.1	CrossMap	TSS	51084	51084	.	+	.	Name=TSS1280
CADEHJ010000001.1	CrossMap	TSS	477291	477291	.	+	.	Name=TSS1281
CADEHJ010000001.1	CrossMap	TSS	51850	51850	.	+	.	Name=TSS1282
CADEHJ010000001.1	CrossMap	TSS	483528	483528	.	+	.	Name=TSS1283
CADEHJ010000001.1	CrossMap	TSS	485789	485789	.	-	.	Name=TSS1284
CADEHJ010000001.1	CrossMap	TSS	52421	52421	.	+	.	Name=TSS1285
CADEHJ010000001.1	CrossMap	TSS	490191	490191	.	-	.	Name=TSS1286
CADEHJ010000001.1	CrossMap	TSS	490277	490277	.	+	.	Name=TSS1287
CADEHJ010000001.1	CrossMap	TSS	491985	491985	.	+	.	Name=TSS1288
CADEHJ010000001.1	CrossMap	TSS	53237	53237	.	+	.	Name=TSS1289
CADEHJ010000001.1	CrossMap	TSS	54267	54267	.	+	.	Name=TSS1292
CADEHJ010000001.1	CrossMap	TSS	54660	54660	.	+	.	Name=TSS1296
CADEHJ010000001.1	CrossMap	TSS	496159	496159	.	+	.	Name=TSS1297
CADEHJ010000001.1	CrossMap	TSS	497622	497622	.	+	.	Name=TSS1301
CADEHJ010000001.1	CrossMap	TSS	498294	498294	.	+	.	Name=TSS1302
CADEHJ010000001.1	CrossMap	TSS	55546	55546	.	+	.	Name=TSS1303
CADEHJ010000001.1	CrossMap	TSS	500136	500136	.	+	.	Name=TSS1304
CADEHJ010000001.1	CrossMap	TSS	501332	501332	.	+	.	Name=TSS1305
CADEHJ010000001.1	CrossMap	TSS	502529	502529	.	+	.	Name=TSS1306
CADEHJ010000001.1	CrossMap	TSS	503078	503078	.	+	.	Name=TSS1307
CADEHJ010000001.1	CrossMap	TSS	503725	503725	.	+	.	Name=TSS1308
CADEHJ010000001.1	CrossMap	TSS	503976	503976	.	+	.	Name=TSS1309
CADEHJ010000001.1	CrossMap	TSS	505792	505792	.	+	.	Name=TSS1310
CADEHJ010000001.1	CrossMap	TSS	56391	56391	.	+	.	Name=TSS1311
CADEHJ010000001.1	CrossMap	TSS	508878	508878	.	+	.	Name=TSS1312
CADEHJ010000001.1	CrossMap	TSS	512636	512636	.	+	.	Name=TSS1313
CADEHJ010000001.1	CrossMap	TSS	513349	513349	.	+	.	Name=TSS1314
CADEHJ010000001.1	CrossMap	TSS	518319	518319	.	+	.	Name=TSS1315
CADEHJ010000001.1	CrossMap	TSS	522918	522918	.	+	.	Name=TSS1316
CADEHJ010000001.1	CrossMap	TSS	525318	525318	.	+	.	Name=TSS1317
CADEHJ010000001.1	CrossMap	TSS	527554	527554	.	+	.	Name=TSS1318
CADEHJ010000001.1	CrossMap	TSS	528253	528253	.	+	.	Name=TSS1319
CADEHJ010000001.1	CrossMap	TSS	529832	529832	.	-	.	Name=TSS1320
CADEHJ010000001.1	CrossMap	TSS	58575	58575	.	+	.	Name=TSS1321
CADEHJ010000001.1	CrossMap	TSS	532097	532097	.	+	.	Name=TSS1322
CADEHJ010000001.1	CrossMap	TSS	535105	535105	.	-	.	Name=TSS1323
CADEHJ010000001.1	CrossMap	TSS	547628	547628	.	-	.	Name=TSS1324
CADEHJ010000001.1	CrossMap	TSS	547719	547719	.	+	.	Name=TSS1325
CADEHJ010000001.1	CrossMap	TSS	549251	549251	.	+	.	Name=TSS1326
CADEHJ010000001.1	CrossMap	TSS	551722	551722	.	-	.	Name=TSS1327
CADEHJ010000001.1	CrossMap	TSS	551842	551842	.	+	.	Name=TSS1328
CADEHJ010000001.1	CrossMap	TSS	59509	59509	.	+	.	Name=TSS1329
CADEHJ010000001.1	CrossMap	TSS	552705	552705	.	+	.	Name=TSS1330
CADEHJ010000001.1	CrossMap	TSS	554933	554933	.	-	.	Name=TSS1331
CADEHJ010000001.1	CrossMap	TSS	555083	555083	.	+	.	Name=TSS1332
CADEHJ010000001.1	CrossMap	TSS	557414	557414	.	+	.	Name=TSS1333
CADEHJ010000001.1	CrossMap	TSS	564659	564659	.	+	.	Name=TSS1334
CADEHJ010000001.1	CrossMap	TSS	565571	565571	.	+	.	Name=TSS1335
CADEHJ010000001.1	CrossMap	TSS	568278	568278	.	-	.	Name=TSS1336
CADEHJ010000001.1	CrossMap	TSS	568377	568377	.	+	.	Name=TSS1337
CADEHJ010000001.1	CrossMap	TSS	569832	569832	.	+	.	Name=TSS1338
CADEHJ010000001.1	CrossMap	TSS	573373	573373	.	-	.	Name=TSS1339
CADEHJ010000001.1	CrossMap	TSS	573534	573534	.	+	.	Name=TSS1340
CADEHJ010000001.1	CrossMap	TSS	575757	575757	.	-	.	Name=TSS1341
CADEHJ010000001.1	CrossMap	TSS	580697	580697	.	-	.	Name=TSS1342
CADEHJ010000001.1	CrossMap	TSS	62619	62619	.	+	.	Name=TSS1343
CADEHJ010000001.1	CrossMap	TSS	586743	586743	.	-	.	Name=TSS1344
CADEHJ010000001.1	CrossMap	TSS	586892	586892	.	+	.	Name=TSS1345
CADEHJ010000001.1	CrossMap	TSS	588121	588121	.	+	.	Name=TSS1346
CADEHJ010000001.1	CrossMap	TSS	588599	588599	.	+	.	Name=TSS1347
CADEHJ010000001.1	CrossMap	TSS	589780	589780	.	+	.	Name=TSS1348
CADEHJ010000001.1	CrossMap	TSS	592323	592323	.	-	.	Name=TSS1349
CADEHJ010000001.1	CrossMap	TSS	592489	592489	.	+	.	Name=TSS1350
CADEHJ010000001.1	CrossMap	TSS	595150	595150	.	-	.	Name=TSS1351
CADEHJ010000001.1	CrossMap	TSS	64248	64248	.	+	.	Name=TSS1352
CADEHJ010000001.1	CrossMap	TSS	602000	602000	.	+	.	Name=TSS1353
CADEHJ010000001.1	CrossMap	TSS	602523	602523	.	+	.	Name=TSS1354
CADEHJ010000001.1	CrossMap	TSS	602907	602907	.	-	.	Name=TSS1355
CADEHJ010000001.1	CrossMap	TSS	603178	603178	.	-	.	Name=TSS1356
CADEHJ010000001.1	CrossMap	TSS	605774	605774	.	-	.	Name=TSS1357
CADEHJ010000001.1	CrossMap	TSS	605890	605890	.	+	.	Name=TSS1358
CADEHJ010000001.1	CrossMap	TSS	607327	607327	.	+	.	Name=TSS1359
CADEHJ010000001.1	CrossMap	TSS	611278	611278	.	-	.	Name=TSS1360
CADEHJ010000001.1	CrossMap	TSS	611377	611377	.	+	.	Name=TSS1361
CADEHJ010000001.1	CrossMap	TSS	611528	611528	.	+	.	Name=TSS1362
CADEHJ010000001.1	CrossMap	TSS	611531	611531	.	+	.	Name=TSS1363
CADEHJ010000001.1	CrossMap	TSS	615118	615118	.	-	.	Name=TSS1364
CADEHJ010000001.1	CrossMap	TSS	615450	615450	.	+	.	Name=TSS1365
CADEHJ010000001.1	CrossMap	TSS	617866	617866	.	+	.	Name=TSS1366
CADEHJ010000001.1	CrossMap	TSS	623720	623720	.	+	.	Name=TSS1367
CADEHJ010000001.1	CrossMap	TSS	625156	625156	.	+	.	Name=TSS1368
CADEHJ010000001.1	CrossMap	TSS	628314	628314	.	+	.	Name=TSS1369
CADEHJ010000001.1	CrossMap	TSS	629095	629095	.	+	.	Name=TSS1370
CADEHJ010000001.1	CrossMap	TSS	632602	632602	.	-	.	Name=TSS1371
CADEHJ010000001.1	CrossMap	TSS	632762	632762	.	+	.	Name=TSS1372
CADEHJ010000001.1	CrossMap	TSS	635682	635682	.	-	.	Name=TSS1373
CADEHJ010000001.1	CrossMap	TSS	636402	636402	.	+	.	Name=TSS1374
CADEHJ010000001.1	CrossMap	TSS	638542	638542	.	+	.	Name=TSS1375
CADEHJ010000001.1	CrossMap	TSS	639536	639536	.	-	.	Name=TSS1376
CADEHJ010000001.1	CrossMap	TSS	639941	639941	.	-	.	Name=TSS1377
CADEHJ010000001.1	CrossMap	TSS	639970	639970	.	-	.	Name=TSS1378
CADEHJ010000001.1	CrossMap	TSS	641431	641431	.	-	.	Name=TSS1379
CADEHJ010000001.1	CrossMap	TSS	641533	641533	.	+	.	Name=TSS1380
CADEHJ010000001.1	CrossMap	TSS	645664	645664	.	+	.	Name=TSS1381
CADEHJ010000001.1	CrossMap	TSS	647826	647826	.	-	.	Name=TSS1382
CADEHJ010000001.1	CrossMap	TSS	648620	648620	.	-	.	Name=TSS1383
CADEHJ010000001.1	CrossMap	TSS	648738	648738	.	+	.	Name=TSS1384
CADEHJ010000001.1	CrossMap	TSS	650229	650229	.	+	.	Name=TSS1385
CADEHJ010000001.1	CrossMap	TSS	651051	651051	.	-	.	Name=TSS1386
CADEHJ010000001.1	CrossMap	TSS	653439	653439	.	-	.	Name=TSS1387
CADEHJ010000001.1	CrossMap	TSS	654662	654662	.	-	.	Name=TSS1388
CADEHJ010000001.1	CrossMap	TSS	654719	654719	.	+	.	Name=TSS1389
CADEHJ010000001.1	CrossMap	TSS	655228	655228	.	+	.	Name=TSS1390
CADEHJ010000001.1	CrossMap	TSS	656551	656551	.	+	.	Name=TSS1391
CADEHJ010000001.1	CrossMap	TSS	658356	658356	.	-	.	Name=TSS1392
CADEHJ010000001.1	CrossMap	TSS	660153	660153	.	-	.	Name=TSS1393
CADEHJ010000001.1	CrossMap	TSS	665230	665230	.	+	.	Name=TSS1394
CADEHJ010000001.1	CrossMap	TSS	665557	665557	.	+	.	Name=TSS1395
CADEHJ010000001.1	CrossMap	TSS	707034	707034	.	-	.	Name=TSS1396
CADEHJ010000001.1	CrossMap	TSS	709815	709815	.	+	.	Name=TSS1397
CADEHJ010000001.1	CrossMap	TSS	710426	710426	.	+	.	Name=TSS1398
CADEHJ010000001.1	CrossMap	TSS	711503	711503	.	+	.	Name=TSS1399
CADEHJ010000001.1	CrossMap	TSS	712786	712786	.	+	.	Name=TSS1400
CADEHJ010000001.1	CrossMap	TSS	713593	713593	.	+	.	Name=TSS1401
CADEHJ010000001.1	CrossMap	TSS	714452	714452	.	+	.	Name=TSS1402
CADEHJ010000001.1	CrossMap	TSS	717042	717042	.	-	.	Name=TSS1403
CADEHJ010000001.1	CrossMap	TSS	717201	717201	.	+	.	Name=TSS1404
CADEHJ010000001.1	CrossMap	TSS	718681	718681	.	+	.	Name=TSS1405
CADEHJ010000001.1	CrossMap	TSS	719617	719617	.	-	.	Name=TSS1406
CADEHJ010000001.1	CrossMap	TSS	719948	719948	.	-	.	Name=TSS1407
CADEHJ010000001.1	CrossMap	TSS	724387	724387	.	+	.	Name=TSS1410
CADEHJ010000001.1	CrossMap	TSS	726521	726521	.	-	.	Name=TSS1411
CADEHJ010000001.1	CrossMap	TSS	726664	726664	.	+	.	Name=TSS1412
CADEHJ010000001.1	CrossMap	TSS	728324	728324	.	-	.	Name=TSS1413
CADEHJ010000001.1	CrossMap	TSS	728391	728391	.	+	.	Name=TSS1414
CADEHJ010000001.1	CrossMap	TSS	730567	730567	.	+	.	Name=TSS1415
CADEHJ010000001.1	CrossMap	TSS	733073	733073	.	-	.	Name=TSS1416
CADEHJ010000001.1	CrossMap	TSS	733189	733189	.	+	.	Name=TSS1417
CADEHJ010000001.1	CrossMap	TSS	734512	734512	.	+	.	Name=TSS1418
CADEHJ010000001.1	CrossMap	TSS	735213	735213	.	+	.	Name=TSS1419
CADEHJ010000001.1	CrossMap	TSS	735376	735376	.	+	.	Name=TSS1420
CADEHJ010000001.1	CrossMap	TSS	736355	736355	.	+	.	Name=TSS1421
CADEHJ010000001.1	CrossMap	TSS	737665	737665	.	+	.	Name=TSS1422
CADEHJ010000001.1	CrossMap	TSS	737956	737956	.	+	.	Name=TSS1423
CADEHJ010000001.1	CrossMap	TSS	739192	739192	.	+	.	Name=TSS1424
CADEHJ010000001.1	CrossMap	TSS	740883	740883	.	-	.	Name=TSS1425
CADEHJ010000001.1	CrossMap	TSS	742535	742535	.	+	.	Name=TSS1426
CADEHJ010000001.1	CrossMap	TSS	754936	754936	.	+	.	Name=TSS1427
CADEHJ010000001.1	CrossMap	TSS	756070	756070	.	+	.	Name=TSS1428
CADEHJ010000001.1	CrossMap	TSS	767309	767309	.	+	.	Name=TSS1430
CADEHJ010000001.1	CrossMap	TSS	780037	780037	.	+	.	Name=TSS1432
CADEHJ010000001.1	CrossMap	TSS	781563	781563	.	-	.	Name=TSS1433
CADEHJ010000001.1	CrossMap	TSS	781644	781644	.	+	.	Name=TSS1434
CADEHJ010000001.1	CrossMap	TSS	783550	783550	.	+	.	Name=TSS1435
CADEHJ010000001.1	CrossMap	TSS	786402	786402	.	-	.	Name=TSS1436
CADEHJ010000001.1	CrossMap	TSS	786512	786512	.	+	.	Name=TSS1437
CADEHJ010000001.1	CrossMap	TSS	786825	786825	.	+	.	Name=TSS1438
CADEHJ010000001.1	CrossMap	TSS	788722	788722	.	+	.	Name=TSS1439
CADEHJ010000001.1	CrossMap	TSS	789533	789533	.	+	.	Name=TSS1440
CADEHJ010000001.1	CrossMap	TSS	790511	790511	.	+	.	Name=TSS1441
CADEHJ010000001.1	CrossMap	TSS	801802	801802	.	-	.	Name=TSS1442
CADEHJ010000001.1	CrossMap	TSS	807265	807265	.	+	.	Name=TSS1443
CADEHJ010000001.1	CrossMap	TSS	82718	82718	.	+	.	Name=TSS1444
CADEHJ010000001.1	CrossMap	TSS	811150	811150	.	+	.	Name=TSS1445
CADEHJ010000001.1	CrossMap	TSS	818693	818693	.	+	.	Name=TSS1446
CADEHJ010000001.1	CrossMap	TSS	827302	827302	.	-	.	Name=TSS1447
CADEHJ010000001.1	CrossMap	TSS	827412	827412	.	+	.	Name=TSS1448
CADEHJ010000001.1	CrossMap	TSS	828192	828192	.	+	.	Name=TSS1449
CADEHJ010000001.1	CrossMap	TSS	829934	829934	.	-	.	Name=TSS1450
CADEHJ010000001.1	CrossMap	TSS	830014	830014	.	+	.	Name=TSS1451
CADEHJ010000001.1	CrossMap	TSS	832310	832310	.	-	.	Name=TSS1452
CADEHJ010000001.1	CrossMap	TSS	832410	832410	.	+	.	Name=TSS1453
CADEHJ010000001.1	CrossMap	TSS	833206	833206	.	+	.	Name=TSS1454
CADEHJ010000001.1	CrossMap	TSS	834332	834332	.	-	.	Name=TSS1455
CADEHJ010000001.1	CrossMap	TSS	837370	837370	.	-	.	Name=TSS1456
CADEHJ010000001.1	CrossMap	TSS	837969	837969	.	-	.	Name=TSS1457
CADEHJ010000001.1	CrossMap	TSS	841038	841038	.	+	.	Name=TSS1458
CADEHJ010000001.1	CrossMap	TSS	841823	841823	.	+	.	Name=TSS1459
CADEHJ010000001.1	CrossMap	TSS	843390	843390	.	+	.	Name=TSS1460
CADEHJ010000001.1	CrossMap	TSS	86949	86949	.	-	.	Name=TSS1461
CADEHJ010000001.1	CrossMap	TSS	87030	87030	.	+	.	Name=TSS1462
CADEHJ010000001.1	CrossMap	TSS	849413	849413	.	-	.	Name=TSS1463
CADEHJ010000001.1	CrossMap	TSS	849448	849448	.	+	.	Name=TSS1464
CADEHJ010000001.1	CrossMap	TSS	850206	850206	.	+	.	Name=TSS1465
CADEHJ010000001.1	CrossMap	TSS	851882	851882	.	-	.	Name=TSS1466
CADEHJ010000001.1	CrossMap	TSS	852659	852659	.	-	.	Name=TSS1467
CADEHJ010000001.1	CrossMap	TSS	853646	853646	.	-	.	Name=TSS1468
CADEHJ010000001.1	CrossMap	TSS	854293	854293	.	-	.	Name=TSS1469
CADEHJ010000001.1	CrossMap	TSS	854493	854493	.	+	.	Name=TSS1470
CADEHJ010000001.1	CrossMap	TSS	856796	856796	.	-	.	Name=TSS1471
CADEHJ010000001.1	CrossMap	TSS	88106	88106	.	+	.	Name=TSS1472
CADEHJ010000001.1	CrossMap	TSS	857627	857627	.	-	.	Name=TSS1473
CADEHJ010000001.1	CrossMap	TSS	857738	857738	.	+	.	Name=TSS1474
CADEHJ010000001.1	CrossMap	TSS	858226	858226	.	+	.	Name=TSS1475
CADEHJ010000001.1	CrossMap	TSS	858996	858996	.	+	.	Name=TSS1476
CADEHJ010000001.1	CrossMap	TSS	862098	862098	.	-	.	Name=TSS1477
CADEHJ010000001.1	CrossMap	TSS	89063	89063	.	+	.	Name=TSS1478
CADEHJ010000001.1	CrossMap	TSS	874326	874326	.	+	.	Name=TSS1479
CADEHJ010000001.1	CrossMap	TSS	874449	874449	.	+	.	Name=TSS1480
CADEHJ010000001.1	CrossMap	TSS	875099	875099	.	+	.	Name=TSS1481
CADEHJ010000001.1	CrossMap	TSS	875772	875772	.	+	.	Name=TSS1482
CADEHJ010000001.1	CrossMap	TSS	876731	876731	.	+	.	Name=TSS1483
CADEHJ010000001.1	CrossMap	TSS	877881	877881	.	+	.	Name=TSS1484
CADEHJ010000001.1	CrossMap	TSS	879354	879354	.	-	.	Name=TSS1485
CADEHJ010000001.1	CrossMap	TSS	881153	881153	.	+	.	Name=TSS1486
CADEHJ010000001.1	CrossMap	TSS	883132	883132	.	+	.	Name=TSS1487
CADEHJ010000001.1	CrossMap	TSS	884894	884894	.	+	.	Name=TSS1488
CADEHJ010000001.1	CrossMap	TSS	888269	888269	.	+	.	Name=TSS1489
CADEHJ010000001.1	CrossMap	TSS	1070097	1070097	.	-	.	Name=TSS1490
CADEHJ010000001.1	CrossMap	TSS	1069058	1069058	.	-	.	Name=TSS1491
CADEHJ010000001.1	CrossMap	TSS	890059	890059	.	+	.	Name=TSS1492
CADEHJ010000001.1	CrossMap	TSS	91095	91095	.	+	.	Name=TSS1493
CADEHJ010000001.1	CrossMap	TSS	895981	895981	.	-	.	Name=TSS1494
CADEHJ010000001.1	CrossMap	TSS	901348	901348	.	-	.	Name=TSS1495
CADEHJ010000001.1	CrossMap	TSS	903273	903273	.	+	.	Name=TSS1496
CADEHJ010000001.1	CrossMap	TSS	906759	906759	.	-	.	Name=TSS1497
CADEHJ010000001.1	CrossMap	TSS	906911	906911	.	+	.	Name=TSS1498
CADEHJ010000001.1	CrossMap	TSS	92945	92945	.	-	.	Name=TSS1499
CADEHJ010000001.1	CrossMap	TSS	916588	916588	.	-	.	Name=TSS1500
CADEHJ010000001.1	CrossMap	TSS	916598	916598	.	+	.	Name=TSS1501
CADEHJ010000001.1	CrossMap	TSS	917055	917055	.	+	.	Name=TSS1502
CADEHJ010000001.1	CrossMap	TSS	918287	918287	.	+	.	Name=TSS1503
CADEHJ010000001.1	CrossMap	TSS	918446	918446	.	+	.	Name=TSS1504
CADEHJ010000001.1	CrossMap	TSS	919667	919667	.	+	.	Name=TSS1505
CADEHJ010000001.1	CrossMap	TSS	924288	924288	.	+	.	Name=TSS1506
CADEHJ010000001.1	CrossMap	TSS	924683	924683	.	+	.	Name=TSS1507
CADEHJ010000001.1	CrossMap	TSS	925541	925541	.	+	.	Name=TSS1508
CADEHJ010000001.1	CrossMap	TSS	926929	926929	.	+	.	Name=TSS1509
CADEHJ010000001.1	CrossMap	TSS	929501	929501	.	+	.	Name=TSS1510
CADEHJ010000001.1	CrossMap	TSS	931344	931344	.	-	.	Name=TSS1511
CADEHJ010000001.1	CrossMap	TSS	931513	931513	.	+	.	Name=TSS1512
CADEHJ010000001.1	CrossMap	TSS	942213	942213	.	+	.	Name=TSS1513
CADEHJ010000001.1	CrossMap	TSS	943445	943445	.	+	.	Name=TSS1514
CADEHJ010000001.1	CrossMap	TSS	945244	945244	.	-	.	Name=TSS1515
CADEHJ010000001.1	CrossMap	TSS	953293	953293	.	+	.	Name=TSS1516
CADEHJ010000001.1	CrossMap	TSS	955341	955341	.	+	.	Name=TSS1517
CADEHJ010000001.1	CrossMap	TSS	957425	957425	.	+	.	Name=TSS1518
CADEHJ010000001.1	CrossMap	TSS	960494	960494	.	+	.	Name=TSS1519
CADEHJ010000001.1	CrossMap	TSS	960581	960581	.	+	.	Name=TSS1520
CADEHJ010000001.1	CrossMap	TSS	961380	961380	.	+	.	Name=TSS1521
CADEHJ010000001.1	CrossMap	TSS	963039	963039	.	+	.	Name=TSS1522
CADEHJ010000001.1	CrossMap	TSS	964164	964164	.	+	.	Name=TSS1523
CADEHJ010000001.1	CrossMap	TSS	965450	965450	.	+	.	Name=TSS1524
CADEHJ010000001.1	CrossMap	TSS	966440	966440	.	+	.	Name=TSS1525
CADEHJ010000001.1	CrossMap	TSS	968233	968233	.	+	.	Name=TSS1526
CADEHJ010000001.1	CrossMap	TSS	970947	970947	.	+	.	Name=TSS1527
CADEHJ010000001.1	CrossMap	TSS	971031	971031	.	+	.	Name=TSS1528
CADEHJ010000001.1	CrossMap	TSS	972244	972244	.	+	.	Name=TSS1529
CADEHJ010000001.1	CrossMap	TSS	974131	974131	.	+	.	Name=TSS1530
CADEHJ010000001.1	CrossMap	TSS	975086	975086	.	+	.	Name=TSS1531
CADEHJ010000001.1	CrossMap	TSS	975184	975184	.	+	.	Name=TSS1532
CADEHJ010000001.1	CrossMap	TSS	975342	975342	.	+	.	Name=TSS1533
CADEHJ010000001.1	CrossMap	TSS	975852	975852	.	+	.	Name=TSS1534
CADEHJ010000001.1	CrossMap	TSS	976634	976634	.	+	.	Name=TSS1535
CADEHJ010000001.1	CrossMap	TSS	977134	977134	.	+	.	Name=TSS1536
CADEHJ010000001.1	CrossMap	TSS	978566	978566	.	+	.	Name=TSS1537
CADEHJ010000001.1	CrossMap	TSS	980479	980479	.	-	.	Name=TSS1538
CADEHJ010000001.1	CrossMap	TSS	980565	980565	.	+	.	Name=TSS1539
CADEHJ010000001.1	CrossMap	TSS	982116	982116	.	+	.	Name=TSS1540
CADEHJ010000001.1	CrossMap	TSS	982171	982171	.	+	.	Name=TSS1541
CADEHJ010000001.1	CrossMap	TSS	982747	982747	.	+	.	Name=TSS1542
CADEHJ010000001.1	CrossMap	TSS	983775	983775	.	+	.	Name=TSS1543
CADEHJ010000001.1	CrossMap	TSS	985407	985407	.	+	.	Name=TSS1544
CADEHJ010000001.1	CrossMap	TSS	992760	992760	.	+	.	Name=TSS1545
CADEHJ010000001.1	CrossMap	TSS	994734	994734	.	+	.	Name=TSS1546
CADEHJ010000001.1	CrossMap	TSS	995781	995781	.	+	.	Name=TSS1547
CADEHJ010000001.1	CrossMap	TSS	1000430	1000430	.	-	.	Name=TSS1548
CADEHJ010000001.1	CrossMap	TSS	1001297	1001297	.	+	.	Name=TSS1549
CADEHJ010000001.1	CrossMap	TSS	1002069	1002069	.	+	.	Name=TSS1550
CADEHJ010000001.1	CrossMap	TSS	1004524	1004524	.	-	.	Name=TSS1551
CADEHJ010000001.1	CrossMap	TSS	1005726	1005726	.	-	.	Name=TSS1552
CADEHJ010000001.1	CrossMap	TSS	1005937	1005937	.	+	.	Name=TSS1553
CADEHJ010000001.1	CrossMap	TSS	1006046	1006046	.	+	.	Name=TSS1554
CADEHJ010000001.1	CrossMap	TSS	1007255	1007255	.	+	.	Name=TSS1555
CADEHJ010000001.1	CrossMap	TSS	1008775	1008775	.	-	.	Name=TSS1556
CADEHJ010000001.1	CrossMap	TSS	1010060	1010060	.	-	.	Name=TSS1557
CADEHJ010000001.1	CrossMap	TSS	1012956	1012956	.	-	.	Name=TSS1558
CADEHJ010000001.1	CrossMap	TSS	1013094	1013094	.	+	.	Name=TSS1559
CADEHJ010000001.1	CrossMap	TSS	1013793	1013793	.	+	.	Name=TSS1560
CADEHJ010000001.1	CrossMap	TSS	1014231	1014231	.	+	.	Name=TSS1561
CADEHJ010000001.1	CrossMap	TSS	1015557	1015557	.	+	.	Name=TSS1562
CADEHJ010000001.1	CrossMap	TSS	1017750	1017750	.	-	.	Name=TSS1563
CADEHJ010000001.1	CrossMap	TSS	1017819	1017819	.	+	.	Name=TSS1564
CADEHJ010000001.1	CrossMap	TSS	1020554	1020554	.	-	.	Name=TSS1565
CADEHJ010000001.1	CrossMap	TSS	1020656	1020656	.	+	.	Name=TSS1566
CADEHJ010000001.1	CrossMap	TSS	1021212	1021212	.	+	.	Name=TSS1567
CADEHJ010000001.1	CrossMap	TSS	1021565	1021565	.	+	.	Name=TSS1568
CADEHJ010000001.1	CrossMap	TSS	1022988	1022988	.	+	.	Name=TSS1569
CADEHJ010000001.1	CrossMap	TSS	1025742	1025742	.	+	.	Name=TSS1570
CADEHJ010000001.1	CrossMap	TSS	1026908	1026908	.	+	.	Name=TSS1571
CADEHJ010000001.1	CrossMap	TSS	1029092	1029092	.	+	.	Name=TSS1572
CADEHJ010000001.1	CrossMap	TSS	1031643	1031643	.	-	.	Name=TSS1573
CADEHJ010000001.1	CrossMap	TSS	1032859	1032859	.	-	.	Name=TSS1574
CADEHJ010000001.1	CrossMap	TSS	1032939	1032939	.	+	.	Name=TSS1575
CADEHJ010000001.1	CrossMap	TSS	1033104	1033104	.	+	.	Name=TSS1576

## Sheet: EGD-e_Lifted_unmapped
EGD-e TSS positions unmapped to RO15
Positions (start,end) in EGD-e genome
##gff-version3
seqid	source	type	start	end	score	strand	phase	attributes
NC_003210.1	Wurtzel_et_al	TSS	1136642	1136642	.	-	.	Name=TSS83
NC_003210.1	Wurtzel_et_al	TSS	1137917	1137917	.	-	.	Name=TSS84
NC_003210.1	Wurtzel_et_al	TSS	1152963	1152963	.	+	.	Name=TSS85
NC_003210.1	Wurtzel_et_al	TSS	1153822	1153822	.	+	.	Name=TSS86
NC_003210.1	Wurtzel_et_al	TSS	1157289	1157289	.	-	.	Name=TSS87
NC_003210.1	Wurtzel_et_al	TSS	156	156	.	+	.	Name=TSS308
NC_003210.1	Wurtzel_et_al	TSS	1641120	1641120	.	-	.	Name=TSS359
NC_003210.1	Wurtzel_et_al	TSS	1741022	1741022	.	-	.	Name=TSS424
NC_003210.1	Wurtzel_et_al	TSS	1741083	1741083	.	-	.	Name=TSS425
NC_003210.1	Wurtzel_et_al	TSS	2361870	2361870	.	+	.	Name=TSS820
NC_003210.1	Wurtzel_et_al	TSS	2364449	2364449	.	-	.	Name=TSS821
NC_003210.1	Wurtzel_et_al	TSS	237236	237236	.	+	.	Name=TSS822
NC_003210.1	Wurtzel_et_al	TSS	2397277	2397277	.	-	.	Name=TSS823
NC_003210.1	Wurtzel_et_al	TSS	2398564	2398564	.	-	.	Name=TSS825
NC_003210.1	Wurtzel_et_al	TSS	2398673	2398673	.	+	.	Name=TSS826
NC_003210.1	Wurtzel_et_al	TSS	2399430	2399430	.	+	.	Name=TSS827
NC_003210.1	Wurtzel_et_al	TSS	2400246	2400246	.	+	.	Name=TSS828
NC_003210.1	Wurtzel_et_al	TSS	2436190	2436190	.	-	.	Name=TSS843
NC_003210.1	Wurtzel_et_al	TSS	2479947	2479947	.	-	.	Name=TSS882
NC_003210.1	Wurtzel_et_al	TSS	2480295	2480295	.	+	.	Name=TSS883
NC_003210.1	Wurtzel_et_al	TSS	2481213	2481213	.	-	.	Name=TSS884
NC_003210.1	Wurtzel_et_al	TSS	2481602	2481602	.	-	.	Name=TSS885
NC_003210.1	Wurtzel_et_al	TSS	2507268	2507268	.	-	.	Name=TSS912
NC_003210.1	Wurtzel_et_al	TSS	2672736	2672736	.	-	.	Name=TSS1010
NC_003210.1	Wurtzel_et_al	TSS	284308	284308	.	+	.	Name=TSS1136
NC_003210.1	Wurtzel_et_al	TSS	2888321	2888321	.	-	.	Name=TSS1157
NC_003210.1	Wurtzel_et_al	TSS	2890699	2890699	.	-	.	Name=TSS1158
NC_003210.1	Wurtzel_et_al	TSS	2892470	2892470	.	-	.	Name=TSS1160
NC_003210.1	Wurtzel_et_al	TSS	315916	315916	.	+	.	Name=TSS1199
NC_003210.1	Wurtzel_et_al	TSS	333492	333492	.	+	.	Name=TSS1208
NC_003210.1	Wurtzel_et_al	TSS	356552	356552	.	+	.	Name=TSS1217
NC_003210.1	Wurtzel_et_al	TSS	357591	357591	.	+	.	Name=TSS1218
NC_003210.1	Wurtzel_et_al	TSS	369106	369106	.	+	.	Name=TSS1223
NC_003210.1	Wurtzel_et_al	TSS	49914	49914	.	+	.	Name=TSS1290
NC_003210.1	Wurtzel_et_al	TSS	502780	502780	.	+	.	Name=TSS1291
NC_003210.1	Wurtzel_et_al	TSS	506334	506334	.	+	.	Name=TSS1293
NC_003210.1	Wurtzel_et_al	TSS	506968	506968	.	+	.	Name=TSS1294
NC_003210.1	Wurtzel_et_al	TSS	507544	507544	.	+	.	Name=TSS1295
NC_003210.1	Wurtzel_et_al	TSS	513287	513287	.	-	.	Name=TSS1298
NC_003210.1	Wurtzel_et_al	TSS	513848	513848	.	+	.	Name=TSS1299
NC_003210.1	Wurtzel_et_al	TSS	514655	514655	.	+	.	Name=TSS1300
NC_003210.1	Wurtzel_et_al	TSS	689972	689972	.	+	.	Name=TSS1408
NC_003210.1	Wurtzel_et_al	TSS	690595	690595	.	+	.	Name=TSS1409
NC_003210.1	Wurtzel_et_al	TSS	73659	73659	.	+	.	Name=TSS1429
NC_003210.1	Wurtzel_et_al	TSS	74087	74087	.	+	.	Name=TSS1431

## Sheet: RO15_TSS
##gff-version	3
seqid	source	type	start	end	score	strand	phase	attributes
CADEHJ010000001.1	ANNOgesic	TSS	1355	1355	.	+	.	Name=TSS:1355_f;ID=CADEHJ010000001.1_tss0;type=Secondary,Internal;utr_length=Secondary_195,Internal_NA;associated_gene=OCPFDLNE_00002,OCPFDLNE_00001;libs=all;method=TSSpredator
CADEHJ010000001.1	ANNOgesic	TSS	1364	1364	.	+	.	Name=TSS:1364_f;ID=CADEHJ010000001.1_tss1;type=Primary;utr_length=Primary_186;associated_gene=OCPFDLNE_00002;libs=all;method=TSSpredator
CADEHJ010000001.1	ANNOgesic	TSS	2156	2156	.	+	.	Name=TSS:2156_f;ID=CADEHJ010000001.1_tss2;type=Internal;utr_length=Internal_NA;associated_gene=OCPFDLNE_00002;libs=all;method=TSSpredator
CADEHJ010000001.1	ANNOgesic	TSS	4293	4293	.	+	.	Name=TSS:4293_f;ID=CADEHJ010000001.1_tss3;type=Primary,Internal;utr_length=Primary_259,Internal_NA;associated_gene=OCPFDLNE_00005,OCPFDLNE_00004;libs=all;method=TSSpredator
CADEHJ010000001.1	ANNOgesic	TSS	10380	10380	.	+	.	Name=TSS:10380_f;ID=CADEHJ010000001.1_tss4;type=Primary;utr_length=Primary_31;associated_gene=OCPFDLNE_00008;libs=all;method=TSSpredator
CADEHJ010000001.1	ANNOgesic	TSS	11777	11777	.	+	.	Name=TSS:11777_f;ID=CADEHJ010000001.1_tss5;type=Primary,Internal;utr_length=Primary_164,Internal_NA;associated_gene=OCPFDLNE_00009,OCPFDLNE_00008;libs=all;method=TSSpredator
CADEHJ010000001.1	ANNOgesic	TSS	12558	12558	.	+	.	Name=TSS:12558_f;ID=CADEHJ010000001.1_tss6;type=Primary;utr_length=Primary_43;associated_gene=OCPFDLNE_00010;libs=all;method=TSSpredator
CADEHJ010000001.1	ANNOgesic	TSS	15635	15635	.	+	.	Name=TSS:15635_f;ID=CADEHJ010000001.1_tss7;type=Secondary;utr_length=Secondary_267;associated_gene=OCPFDLNE_00013;libs=all;method=TSSpredator
CADEHJ010000001.1	ANNOgesic	TSS	15707	15707	.	+	.	Name=TSS:15707_f;ID=CADEHJ010000001.1_tss8;type=Primary;utr_length=Primary_195;associated_gene=OCPFDLNE_00013;libs=all;method=TSSpredator
CADEHJ010000001.1	ANNOgesic	TSS	23659	23659	.	-	.	Name=TSS:23659_r;ID=CADEHJ010000001.1_tss9;type=Primary;utr_length=Primary_23;associated_gene=OCPFDLNE_00019;libs=all;method=TSSpredator
CADEHJ010000001.1	ANNOgesic	TSS	27180	27180	.	+	.	Name=TSS:27180_f;ID=CADEHJ010000001.1_tss10;type=Internal;utr_length=Internal_NA;associated_gene=OCPFDLNE_00025;libs=all;method=TSSpredator
CADEHJ010000001.1	ANNOgesic	TSS	28647	28647	.	+	.	Name=TSS:28647_f;ID=CADEHJ010000001.1_tss11;type=Primary;utr_length=Primary_136;associated_gene=OCPFDLNE_00027;libs=all;method=TSSpredator
CADEHJ010000001.1	ANNOgesic	TSS	31691	31691	.	+	.	Name=TSS:31691_f;ID=CADEHJ010000001.1_tss12;type=Orphan;utr_length=Orphan_NA;associated_gene=orphan;libs=all;method=TSSpredator
CADEHJ010000001.1	ANNOgesic	TSS	35483	35483	.	-	.	Name=TSS:35483_r;ID=CADEHJ010000001.1_tss13;type=Primary,Internal;utr_length=Primary_244,Internal_NA;associated_gene=OCPFDLNE_00033,OCPFDLNE_00034;libs=all;method=TSSpredator
CADEHJ010000001.1	ANNOgesic	TSS	35785	35785	.	-	.	Name=TSS:35785_r;ID=CADEHJ010000001.1_tss14;type=Primary;utr_length=Primary_35;associated_gene=OCPFDLNE_00034;libs=all;method=TSSpredator
CADEHJ010000001.1	ANNOgesic	TSS	35945	35945	.	+	.	Name=TSS:35945_f;ID=CADEHJ010000001.1_tss15;type=Primary;utr_length=Primary_36;associated_gene=OCPFDLNE_00035;libs=all;method=TSSpredator
CADEHJ010000001.1	ANNOgesic	TSS	38268	38268	.	-	.	Name=TSS:38268_r;ID=CADEHJ010000001.1_tss16;type=Primary;utr_length=Primary_32;associated_gene=OCPFDLNE_00037;libs=all;method=TSSpredator
CADEHJ010000001.1	ANNOgesic	TSS	44188	44188	.	+	.	Name=TSS:44188_f;ID=CADEHJ010000001.1_tss17;type=Internal;utr_length=Internal_NA;associated_gene=OCPFDLNE_00041;libs=all;method=TSSpredator
CADEHJ010000001.1	ANNOgesic	TSS	44423	44423	.	+	.	Name=TSS:44423_f;ID=CADEHJ010000001.1_tss18;type=Primary;utr_length=Primary_66;associated_gene=OCPFDLNE_00042;libs=all;method=TSSpredator
CADEHJ010000001.1	ANNOgesic	TSS	46570	46570	.	+	.	Name=TSS:46570_f;ID=CADEHJ010000001.1_tss19;type=Internal;utr_length=Internal_NA;associated_gene=OCPFDLNE_00043;libs=all;method=TSSpredator
CADEHJ010000001.1	ANNOgesic	TSS	49084	49084	.	+	.	Name=TSS:49084_f;ID=CADEHJ010000001.1_tss20;type=Primary;utr_length=Primary_25;associated_gene=OCPFDLNE_00046;libs=all;method=TSSpredator
CADEHJ010000001.1	ANNOgesic	TSS	51084	51084	.	+	.	Name=TSS:51084_f;ID=CADEHJ010000001.1_tss21;type=Primary;utr_length=Primary_35;associated_gene=OCPFDLNE_00048;libs=all;method=TSSpredator
CADEHJ010000001.1	ANNOgesic	TSS	51850	51850	.	+	.	Name=TSS:51850_f;ID=CADEHJ010000001.1_tss22;type=Primary;utr_length=Primary_14;associated_gene=OCPFDLNE_00049;libs=all;method=TSSpredator
CADEHJ010000001.1	ANNOgesic	TSS	53237	53237	.	+	.	Name=TSS:53237_f;ID=CADEHJ010000001.1_tss23;type=Primary;utr_length=Primary_132;associated_gene=OCPFDLNE_00050;libs=all;method=TSSpredator
CADEHJ010000001.1	ANNOgesic	TSS	54660	54660	.	+	.	Name=TSS:54660_f;ID=CADEHJ010000001.1_tss24;type=Primary;utr_length=Primary_31;associated_gene=OCPFDLNE_00053;libs=all;method=TSSpredator
CADEHJ010000001.1	ANNOgesic	TSS	55546	55546	.	+	.	Name=TSS:55546_f;ID=CADEHJ010000001.1_tss25;type=Primary;utr_length=Primary_13;associated_gene=OCPFDLNE_00054;libs=all;method=TSSpredator
CADEHJ010000001.1	ANNOgesic	TSS	58538	58538	.	+	.	Name=TSS:58538_f;ID=CADEHJ010000001.1_tss26;type=Primary;utr_length=Primary_85;associated_gene=OCPFDLNE_00058;libs=all;method=TSSpredator
CADEHJ010000001.1	ANNOgesic	TSS	62619	62619	.	+	.	Name=TSS:62619_f;ID=CADEHJ010000001.1_tss27;type=Primary;utr_length=Primary_62;associated_gene=OCPFDLNE_00061;libs=all;method=TSSpredator
CADEHJ010000001.1	ANNOgesic	TSS	64248	64248	.	+	.	Name=TSS:64248_f;ID=CADEHJ010000001.1_tss28;type=Primary;utr_length=Primary_43;associated_gene=OCPFDLNE_00062;libs=all;method=TSSpredator
CADEHJ010000001.1	ANNOgesic	TSS	76604	76604	.	+	.	Name=TSS:76604_f;ID=CADEHJ010000001.1_tss29;type=Internal;utr_length=Internal_NA;associated_gene=OCPFDLNE_00071;libs=all;method=TSSpredator
CADEHJ010000001.1	ANNOgesic	TSS	77061	77061	.	+	.	Name=TSS:77061_f;ID=CADEHJ010000001.1_tss30;type=Internal;utr_length=Internal_NA;associated_gene=OCPFDLNE_00072;libs=all;method=TSSpredator
CADEHJ010000001.1	ANNOgesic	TSS	77499	77499	.	-	.	Name=TSS:77499_r;ID=CADEHJ010000001.1_tss31;type=Antisense;utr_length=Antisense_NA;associated_gene=OCPFDLNE_00072;libs=all;method=TSSpredator
CADEHJ010000001.1	ANNOgesic	TSS	80732	80732	.	+	.	Name=TSS:80732_f;ID=CADEHJ010000001.1_tss32;type=Internal;utr_length=Internal_NA;associated_gene=OCPFDLNE_00077;libs=all;method=TSSpredator
CADEHJ010000001.1	ANNOgesic	TSS	83940	83940	.	+	.	Name=TSS:83940_f;ID=CADEHJ010000001.1_tss33;type=Internal;utr_length=Internal_NA;associated_gene=OCPFDLNE_00081;libs=all;method=TSSpredator
CADEHJ010000001.1	ANNOgesic	TSS	84852	84852	.	+	.	Name=TSS:84852_f;ID=CADEHJ010000001.1_tss34;type=Internal;utr_length=Internal_NA;associated_gene=OCPFDLNE_00082;libs=all;method=TSSpredator
CADEHJ010000001.1	ANNOgesic	TSS	86949	86949	.	-	.	Name=TSS:86949_r;ID=CADEHJ010000001.1_tss35;type=Primary;utr_length=Primary_18;associated_gene=OCPFDLNE_00084;libs=all;method=TSSpredator
CADEHJ010000001.1	ANNOgesic	TSS	87030	87030	.	+	.	Name=TSS:87030_f;ID=CADEHJ010000001.1_tss36;type=Primary,Antisense;utr_length=Primary_32,Antisense_NA;associated_gene=OCPFDLNE_00085,OCPFDLNE_00084;libs=all;method=TSSpredator
CADEHJ010000001.1	ANNOgesic	TSS	88090	88090	.	+	.	Name=TSS:88090_f;ID=CADEHJ010000001.1_tss37;type=Primary;utr_length=Primary_16;associated_gene=OCPFDLNE_00086;libs=all;method=TSSpredator
CADEHJ010000001.1	ANNOgesic	TSS	89063	89063	.	+	.	Name=TSS:89063_f;ID=CADEHJ010000001.1_tss38;type=Internal;utr_length=Internal_NA;associated_gene=OCPFDLNE_00087;libs=all;method=TSSpredator
CADEHJ010000001.1	ANNOgesic	TSS	89523	89523	.	+	.	Name=TSS:89523_f;ID=CADEHJ010000001.1_tss39;type=Internal;utr_length=Internal_NA;associated_gene=OCPFDLNE_00087;libs=all;method=TSSpredator
CADEHJ010000001.1	ANNOgesic	TSS	95355	95355	.	-	.	Name=TSS:95355_r;ID=CADEHJ010000001.1_tss40;type=Antisense;utr_length=Antisense_NA;associated_gene=OCPFDLNE_00094;libs=all;method=TSSpredator
CADEHJ010000001.1	ANNOgesic	TSS	102738	102738	.	+	.	Name=TSS:102738_f;ID=CADEHJ010000001.1_tss41;type=Internal;utr_length=Internal_NA;associated_gene=OCPFDLNE_00097;libs=all;method=TSSpredator
CADEHJ010000001.1	ANNOgesic	TSS	108319	108319	.	+	.	Name=TSS:108319_f;ID=CADEHJ010000001.1_tss42;type=Primary;utr_length=Primary_48;associated_gene=OCPFDLNE_00103;libs=all;method=TSSpredator
CADEHJ010000001.1	ANNOgesic	TSS	109259	109259	.	+	.	Name=TSS:109259_f;ID=CADEHJ010000001.1_tss43;type=Primary;utr_length=Primary_39;associated_gene=OCPFDLNE_00104;libs=all;method=TSSpredator
CADEHJ010000001.1	ANNOgesic	TSS	112121	112121	.	+	.	Name=TSS:112121_f;ID=CADEHJ010000001.1_tss44;type=Primary;utr_length=Primary_32;associated_gene=OCPFDLNE_00107;libs=all;method=TSSpredator
CADEHJ010000001.1	ANNOgesic	TSS	112643	112643	.	+	.	Name=TSS:112643_f;ID=CADEHJ010000001.1_tss45;type=Primary;utr_length=Primary_21;associated_gene=OCPFDLNE_00108;libs=all;method=TSSpredator
CADEHJ010000001.1	ANNOgesic	TSS	113373	113373	.	-	.	Name=TSS:113373_r;ID=CADEHJ010000001.1_tss46;type=Orphan;utr_length=Orphan_NA;associated_gene=orphan;libs=all;method=TSSpredator
CADEHJ010000001.1	ANNOgesic	TSS	114477	114477	.	-	.	Name=TSS:114477_r;ID=CADEHJ010000001.1_tss47;type=Antisense;utr_length=Antisense_NA;associated_gene=OCPFDLNE_00110;libs=all;method=TSSpredator
CADEHJ010000001.1	ANNOgesic	TSS	114489	114489	.	+	.	Name=TSS:114489_f;ID=CADEHJ010000001.1_tss48;type=Primary;utr_length=Primary_28;associated_gene=OCPFDLNE_00111;libs=all;method=TSSpredator
CADEHJ010000001.1	ANNOgesic	TSS	115034	115034	.	+	.	Name=TSS:115034_f;ID=CADEHJ010000001.1_tss49;type=Primary;utr_length=Primary_147;associated_gene=OCPFDLNE_00112;libs=all;method=TSSpredator
CADEHJ010000001.1	ANNOgesic	TSS	117529	117529	.	+	.	Name=TSS:117529_f;ID=CADEHJ010000001.1_tss50;type=Primary;utr_length=Primary_27;associated_gene=OCPFDLNE_00113;libs=all;method=TSSpredator
CADEHJ010000001.1	ANNOgesic	TSS	122107	122107	.	+	.	Name=TSS:122107_f;ID=CADEHJ010000001.1_tss51;type=Primary;utr_length=Primary_35;associated_gene=OCPFDLNE_00116;libs=all;method=TSSpredator
CADEHJ010000001.1	ANNOgesic	TSS	124215	124215	.	+	.	Name=TSS:124215_f;ID=CADEHJ010000001.1_tss52;type=Primary;utr_length=Primary_15;associated_gene=OCPFDLNE_00118;libs=all;method=TSSpredator
CADEHJ010000001.1	ANNOgesic	TSS	126641	126641	.	-	.	Name=TSS:126641_r;ID=CADEHJ010000001.1_tss53;type=Primary;utr_length=Primary_24;associated_gene=OCPFDLNE_00122;libs=all;method=TSSpredator
CADEHJ010000001.1	ANNOgesic	TSS	127070	127070	.	+	.	Name=TSS:127070_f;ID=CADEHJ010000001.1_tss54;type=Primary,Internal;utr_length=Primary_204,Internal_NA;associated_gene=OCPFDLNE_00124,OCPFDLNE_00123;libs=all;method=TSSpredator
CADEHJ010000001.1	ANNOgesic	TSS	138997	138997	.	-	.	Name=TSS:138997_r;ID=CADEHJ010000001.1_tss55;type=Primary;utr_length=Primary_60;associated_gene=OCPFDLNE_00138;libs=all;method=TSSpredator
CADEHJ010000001.1	ANNOgesic	TSS	139115	139115	.	+	.	Name=TSS:139115_f;ID=CADEHJ010000001.1_tss56;type=Primary;utr_length=Primary_16;associated_gene=OCPFDLNE_00139;libs=all;method=TSSpredator
CADEHJ010000001.1	ANNOgesic	TSS	141500	141500	.	-	.	Name=TSS:141500_r;ID=CADEHJ010000001.1_tss57;type=Primary;utr_length=Primary_42;associated_gene=OCPFDLNE_00140;libs=all;method=TSSpredator
CADEHJ010000001.1	ANNOgesic	TSS	141606	141606	.	+	.	Name=TSS:141606_f;ID=CADEHJ010000001.1_tss58;type=Primary;utr_length=Primary_31;associated_gene=OCPFDLNE_00141;libs=all;method=TSSpredator
CADEHJ010000001.1	ANNOgesic	TSS	147599	147599	.	+	.	Name=TSS:147599_f;ID=CADEHJ010000001.1_tss59;type=Internal;utr_length=Internal_NA;associated_gene=OCPFDLNE_00148;libs=all;method=TSSpredator
CADEHJ010000001.1	ANNOgesic	TSS	149755	149755	.	+	.	Name=TSS:149755_f;ID=CADEHJ010000001.1_tss60;type=Primary;utr_length=Primary_20;associated_gene=OCPFDLNE_00152;libs=all;method=TSSpredator
CADEHJ010000001.1	ANNOgesic	TSS	151541	151541	.	+	.	Name=TSS:151541_f;ID=CADEHJ010000001.1_tss61;type=Primary,Internal;utr_length=Primary_124,Internal_NA;associated_gene=OCPFDLNE_00156,OCPFDLNE_00155;libs=all;method=TSSpredator
CADEHJ010000001.1	ANNOgesic	TSS	152412	152412	.	-	.	Name=TSS:152412_r;ID=CADEHJ010000001.1_tss62;type=Internal;utr_length=Internal_NA;associated_gene=OCPFDLNE_00157;libs=all;method=TSSpredator
CADEHJ010000001.1	ANNOgesic	TSS	153888	153888	.	-	.	Name=TSS:153888_r;ID=CADEHJ010000001.1_tss63;type=Primary;utr_length=Primary_28;associated_gene=OCPFDLNE_00157;libs=all;method=TSSpredator
CADEHJ010000001.1	ANNOgesic	TSS	156649	156649	.	+	.	Name=TSS:156649_f;ID=CADEHJ010000001.1_tss64;type=Antisense;utr_length=Antisense_NA;associated_gene=OCPFDLNE_00161;libs=all;method=TSSpredator
CADEHJ010000001.1	ANNOgesic	TSS	158275	158275	.	+	.	Name=TSS:158275_f;ID=CADEHJ010000001.1_tss65;type=Internal;utr_length=Internal_NA;associated_gene=OCPFDLNE_00162;libs=all;method=TSSpredator
CADEHJ010000001.1	ANNOgesic	TSS	159820	159820	.	+	.	Name=TSS:159820_f;ID=CADEHJ010000001.1_tss66;type=Primary;utr_length=Primary_25;associated_gene=OCPFDLNE_00163;libs=all;method=TSSpredator
CADEHJ010000001.1	ANNOgesic	TSS	160897	160897	.	-	.	Name=TSS:160897_r;ID=CADEHJ010000001.1_tss67;type=Antisense;utr_length=Antisense_NA;associated_gene=OCPFDLNE_00164;libs=all;method=TSSpredator
CADEHJ010000001.1	ANNOgesic	TSS	164934	164934	.	+	.	Name=TSS:164934_f;ID=CADEHJ010000001.1_tss68;type=Internal;utr_length=Internal_NA;associated_gene=OCPFDLNE_00165;libs=all;method=TSSpredator
CADEHJ010000001.1	ANNOgesic	TSS	166100	166100	.	-	.	Name=TSS:166100_r;ID=CADEHJ010000001.1_tss69;type=Primary;utr_length=Primary_43;associated_gene=OCPFDLNE_00166;libs=all;method=TSSpredator
CADEHJ010000001.1	ANNOgesic	TSS	166249	166249	.	+	.	Name=TSS:166249_f;ID=CADEHJ010000001.1_tss70;type=Primary;utr_length=Primary_25;associated_gene=OCPFDLNE_00167;libs=all;method=TSSpredator
CADEHJ010000001.1	ANNOgesic	TSS	169345	169345	.	+	.	Name=TSS:169345_f;ID=CADEHJ010000001.1_tss71;type=Primary,Internal;utr_length=Primary_223,Internal_NA;associated_gene=OCPFDLNE_00172,OCPFDLNE_00171;libs=all;method=TSSpredator
CADEHJ010000001.1	ANNOgesic	TSS	170802	170802	.	-	.	Name=TSS:170802_r;ID=CADEHJ010000001.1_tss72;type=Primary,Antisense;utr_length=Primary_24,Antisense_NA;associated_gene=OCPFDLNE_00173,OCPFDLNE_00174;libs=all;method=TSSpredator
CADEHJ010000001.1	ANNOgesic	TSS	170867	170867	.	+	.	Name=TSS:170867_f;ID=CADEHJ010000001.1_tss73;type=Primary,Antisense;utr_length=Primary_26,Antisense_NA;associated_gene=OCPFDLNE_00174,OCPFDLNE_00173;libs=all;method=TSSpredator
CADEHJ010000001.1	ANNOgesic	TSS	175949	175949	.	-	.	Name=TSS:175949_r;ID=CADEHJ010000001.1_tss74;type=Internal;utr_length=Internal_NA;associated_gene=OCPFDLNE_00177;libs=all;method=TSSpredator
CADEHJ010000001.1	ANNOgesic	TSS	175993	175993	.	+	.	Name=TSS:175993_f;ID=CADEHJ010000001.1_tss75;type=Antisense;utr_length=Antisense_NA;associated_gene=OCPFDLNE_00177;libs=all;method=TSSpredator
CADEHJ010000001.1	ANNOgesic	TSS	177031	177031	.	-	.	Name=TSS:177031_r;ID=CADEHJ010000001.1_tss76;type=Primary;utr_length=Primary_15;associated_gene=OCPFDLNE_00178;libs=all;method=TSSpredator
CADEHJ010000001.1	ANNOgesic	TSS	178598	178598	.	+	.	Name=TSS:178598_f;ID=CADEHJ010000001.1_tss77;type=Primary;utr_length=Primary_41;associated_gene=OCPFDLNE_00180;libs=all;method=TSSpredator
CADEHJ010000001.1	ANNOgesic	TSS	179541	179541	.	+	.	Name=TSS:179541_f;ID=CADEHJ010000001.1_tss78;type=Primary;utr_length=Primary_27;associated_gene=OCPFDLNE_00181;libs=all;method=TSSpredator
CADEHJ010000001.1	ANNOgesic	TSS	181670	181670	.	+	.	Name=TSS:181670_f;ID=CADEHJ010000001.1_tss79;type=Primary;utr_length=Primary_59;associated_gene=OCPFDLNE_00182;libs=all;method=TSSpredator
CADEHJ010000001.1	ANNOgesic	TSS	193404	193404	.	+	.	Name=TSS:193404_f;ID=CADEHJ010000001.1_tss80;type=Primary;utr_length=Primary_26;associated_gene=OCPFDLNE_00189;libs=all;method=TSSpredator
CADEHJ010000001.1	ANNOgesic	TSS	194473	194473	.	+	.	Name=TSS:194473_f;ID=CADEHJ010000001.1_tss81;type=Primary;utr_length=Primary_22;associated_gene=OCPFDLNE_00190;libs=all;method=TSSpredator
CADEHJ010000001.1	ANNOgesic	TSS	195793	195793	.	+	.	Name=TSS:195793_f;ID=CADEHJ010000001.1_tss82;type=Primary;utr_length=Primary_30;associated_gene=OCPFDLNE_00191;libs=all;method=TSSpredator
CADEHJ010000001.1	ANNOgesic	TSS	197341	197341	.	+	.	Name=TSS:197341_f;ID=CADEHJ010000001.1_tss83;type=Secondary;utr_length=Secondary_57;associated_gene=OCPFDLNE_00193;libs=all;method=TSSpredator
CADEHJ010000001.1	ANNOgesic	TSS	197381	197381	.	+	.	Name=TSS:197381_f;ID=CADEHJ010000001.1_tss84;type=Primary;utr_length=Primary_17;associated_gene=OCPFDLNE_00193;libs=all;method=TSSpredator
CADEHJ010000001.1	ANNOgesic	TSS	197765	197765	.	+	.	Name=TSS:197765_f;ID=CADEHJ010000001.1_tss85;type=Primary;utr_length=Primary_29;associated_gene=OCPFDLNE_00194;libs=all;method=TSSpredator
CADEHJ010000001.1	ANNOgesic	TSS	199532	199532	.	+	.	Name=TSS:199532_f;ID=CADEHJ010000001.1_tss86;type=Primary;utr_length=Primary_66;associated_gene=OCPFDLNE_00196;libs=all;method=TSSpredator
CADEHJ010000001.1	ANNOgesic	TSS	200529	200529	.	+	.	Name=TSS:200529_f;ID=CADEHJ010000001.1_tss87;type=Primary;utr_length=Primary_62;associated_gene=OCPFDLNE_00197;libs=all;method=TSSpredator
CADEHJ010000001.1	ANNOgesic	TSS	203580	203580	.	+	.	Name=TSS:203580_f;ID=CADEHJ010000001.1_tss88;type=Orphan;utr_length=Orphan_NA;associated_gene=orphan;libs=all;method=TSSpredator
CADEHJ010000001.1	ANNOgesic	TSS	203761	203761	.	+	.	Name=TSS:203761_f;ID=CADEHJ010000001.1_tss89;type=Primary;utr_length=Primary_137;associated_gene=OCPFDLNE_00200;libs=all;method=TSSpredator
CADEHJ010000001.1	ANNOgesic	TSS	204743	204743	.	+	.	Name=TSS:204743_f;ID=CADEHJ010000001.1_tss90;type=Secondary;utr_length=Secondary_278;associated_gene=OCPFDLNE_00202;libs=all;method=TSSpredator
CADEHJ010000001.1	ANNOgesic	TSS	204989	204989	.	+	.	Name=TSS:204989_f;ID=CADEHJ010000001.1_tss91;type=Primary;utr_length=Primary_32;associated_gene=OCPFDLNE_00202;libs=all;method=TSSpredator
CADEHJ010000001.1	ANNOgesic	TSS	208182	208182	.	-	.	Name=TSS:208182_r;ID=CADEHJ010000001.1_tss92;type=Primary;utr_length=Primary_30;associated_gene=OCPFDLNE_00204;libs=all;method=TSSpredator
CADEHJ010000001.1	ANNOgesic	TSS	209160	209160	.	-	.	Name=TSS:209160_r;ID=CADEHJ010000001.1_tss93;type=Internal;utr_length=Internal_NA;associated_gene=OCPFDLNE_00205;libs=all;method=TSSpredator
CADEHJ010000001.1	ANNOgesic	TSS	209401	209401	.	-	.	Name=TSS:209401_r;ID=CADEHJ010000001.1_tss94;type=Primary;utr_length=Primary_25;associated_gene=OCPFDLNE_00205;libs=all;method=TSSpredator
CADEHJ010000001.1	ANNOgesic	TSS	211388	211388	.	+	.	Name=TSS:211388_f;ID=CADEHJ010000001.1_tss95;type=Primary;utr_length=Primary_150;associated_gene=OCPFDLNE_00207;libs=all;method=TSSpredator
CADEHJ010000001.1	ANNOgesic	TSS	216595	216595	.	+	.	Name=TSS:216595_f;ID=CADEHJ010000001.1_tss96;type=Primary;utr_length=Primary_28;associated_gene=OCPFDLNE_00211;libs=all;method=TSSpredator
CADEHJ010000001.1	ANNOgesic	TSS	217492	217492	.	-	.	Name=TSS:217492_r;ID=CADEHJ010000001.1_tss97;type=Primary;utr_length=Primary_25;associated_gene=OCPFDLNE_00212;libs=all;method=TSSpredator
CADEHJ010000001.1	ANNOgesic	TSS	218228	218228	.	-	.	Name=TSS:218228_r;ID=CADEHJ010000001.1_tss98;type=Primary;utr_length=Primary_20;associated_gene=OCPFDLNE_00213;libs=all;method=TSSpredator
CADEHJ010000001.1	ANNOgesic	TSS	219257	219257	.	-	.	Name=TSS:219257_r;ID=CADEHJ010000001.1_tss99;type=Primary;utr_length=Primary_31;associated_gene=OCPFDLNE_00214;libs=all;method=TSSpredator
CADEHJ010000001.1	ANNOgesic	TSS	219386	219386	.	-	.	Name=TSS:219386_r;ID=CADEHJ010000001.1_tss100;type=Secondary;utr_length=Secondary_160;associated_gene=OCPFDLNE_00214;libs=all;method=TSSpredator
CADEHJ010000001.1	ANNOgesic	TSS	220216	220216	.	+	.	Name=TSS:220216_f;ID=CADEHJ010000001.1_tss101;type=Primary;utr_length=Primary_17;associated_gene=OCPFDLNE_00216;libs=all;method=TSSpredator
CADEHJ010000001.1	ANNOgesic	TSS	220859	220859	.	+	.	Name=TSS:220859_f;ID=CADEHJ010000001.1_tss102;type=Primary;utr_length=Primary_65;associated_gene=OCPFDLNE_00217;libs=all;method=TSSpredator
CADEHJ010000001.1	ANNOgesic	TSS	226383	226383	.	+	.	Name=TSS:226383_f;ID=CADEHJ010000001.1_tss103;type=Internal;utr_length=Internal_NA;associated_gene=OCPFDLNE_00219;libs=all;method=TSSpredator
CADEHJ010000001.1	ANNOgesic	TSS	227221	227221	.	+	.	Name=TSS:227221_f;ID=CADEHJ010000001.1_tss104;type=Primary;utr_length=Primary_68;associated_gene=OCPFDLNE_00221;libs=all;method=TSSpredator
CADEHJ010000001.1	ANNOgesic	TSS	229202	229202	.	+	.	Name=TSS:229202_f;ID=CADEHJ010000001.1_tss105;type=Internal;utr_length=Internal_NA;associated_gene=OCPFDLNE_00223;libs=all;method=TSSpredator
CADEHJ010000001.1	ANNOgesic	TSS	232812	232812	.	+	.	Name=TSS:232812_f;ID=CADEHJ010000001.1_tss106;type=Primary;utr_length=Primary_32;associated_gene=OCPFDLNE_00225;libs=all;method=TSSpredator
CADEHJ010000001.1	ANNOgesic	TSS	234607	234607	.	+	.	Name=TSS:234607_f;ID=CADEHJ010000001.1_tss107;type=Primary;utr_length=Primary_32;associated_gene=OCPFDLNE_00227;libs=all;method=TSSpredator
CADEHJ010000001.1	ANNOgesic	TSS	235200	235200	.	-	.	Name=TSS:235200_r;ID=CADEHJ010000001.1_tss108;type=Antisense;utr_length=Antisense_NA;associated_gene=OCPFDLNE_00227;libs=all;method=TSSpredator
CADEHJ010000001.1	ANNOgesic	TSS	235683	235683	.	+	.	Name=TSS:235683_f;ID=CADEHJ010000001.1_tss109;type=Orphan;utr_length=Orphan_NA;associated_gene=orphan;libs=all;method=TSSpredator
CADEHJ010000001.1	ANNOgesic	TSS	235885	235885	.	+	.	Name=TSS:235885_f;ID=CADEHJ010000001.1_tss110;type=Orphan;utr_length=Orphan_NA;associated_gene=orphan;libs=all;method=TSSpredator
CADEHJ010000001.1	ANNOgesic	TSS	236088	236088	.	+	.	Name=TSS:236088_f;ID=CADEHJ010000001.1_tss111;type=Orphan;utr_length=Orphan_NA;associated_gene=orphan;libs=all;method=TSSpredator
CADEHJ010000001.1	ANNOgesic	TSS	236291	236291	.	+	.	Name=TSS:236291_f;ID=CADEHJ010000001.1_tss112;type=Primary;utr_length=Primary_200;associated_gene=OCPFDLNE_00228;libs=all;method=TSSpredator
CADEHJ010000001.1	ANNOgesic	TSS	236443	236443	.	+	.	Name=TSS:236443_f;ID=CADEHJ010000001.1_tss113;type=Secondary;utr_length=Secondary_48;associated_gene=OCPFDLNE_00228;libs=all;method=TSSpredator
CADEHJ010000001.1	ANNOgesic	TSS	238180	238180	.	+	.	Name=TSS:238180_f;ID=CADEHJ010000001.1_tss114;type=Primary;utr_length=Primary_33;associated_gene=OCPFDLNE_00231;libs=all;method=TSSpredator
CADEHJ010000001.1	ANNOgesic	TSS	239288	239288	.	+	.	Name=TSS:239288_f;ID=CADEHJ010000001.1_tss115;type=Primary;utr_length=Primary_35;associated_gene=OCPFDLNE_00232;libs=all;method=TSSpredator
CADEHJ010000001.1	ANNOgesic	TSS	240795	240795	.	+	.	Name=TSS:240795_f;ID=CADEHJ010000001.1_tss116;type=Internal;utr_length=Internal_NA;associated_gene=OCPFDLNE_00232;libs=all;method=TSSpredator
CADEHJ010000001.1	ANNOgesic	TSS	240952	240952	.	+	.	Name=TSS:240952_f;ID=CADEHJ010000001.1_tss117;type=Orphan;utr_length=Orphan_NA;associated_gene=orphan;libs=all;method=TSSpredator
CADEHJ010000001.1	ANNOgesic	TSS	241047	241047	.	+	.	Name=TSS:241047_f;ID=CADEHJ010000001.1_tss118;type=Secondary;utr_length=Secondary_224;associated_gene=OCPFDLNE_00233;libs=all;method=TSSpredator
CADEHJ010000001.1	ANNOgesic	TSS	241267	241267	.	+	.	Name=TSS:241267_f;ID=CADEHJ010000001.1_tss119;type=Primary;utr_length=Primary_4;associated_gene=OCPFDLNE_00233;libs=all;method=TSSpredator
CADEHJ010000001.1	ANNOgesic	TSS	246073	246073	.	+	.	Name=TSS:246073_f;ID=CADEHJ010000001.1_tss120;type=Primary;utr_length=Primary_3;associated_gene=OCPFDLNE_00235;libs=all;method=TSSpredator
CADEHJ010000001.1	ANNOgesic	TSS	246198	246198	.	+	.	Name=TSS:246198_f;ID=CADEHJ010000001.1_tss121;type=Primary,Internal;utr_length=Primary_81,Internal_NA;associated_gene=OCPFDLNE_00237,OCPFDLNE_00236;libs=all;method=TSSpredator
CADEHJ010000001.1	ANNOgesic	TSS	246279	246279	.	+	.	Name=TSS:246279_f;ID=CADEHJ010000001.1_tss122;type=Secondary;utr_length=Secondary_0;associated_gene=OCPFDLNE_00237;libs=all;method=TSSpredator
CADEHJ010000001.1	ANNOgesic	TSS	246570	246570	.	+	.	Name=TSS:246570_f;ID=CADEHJ010000001.1_tss123;type=Primary;utr_length=Primary_0;associated_gene=OCPFDLNE_00240;libs=all;method=TSSpredator
CADEHJ010000001.1	ANNOgesic	TSS	246761	246761	.	+	.	Name=TSS:246761_f;ID=CADEHJ010000001.1_tss124;type=Primary;utr_length=Primary_0;associated_gene=OCPFDLNE_00242;libs=all;method=TSSpredator
CADEHJ010000001.1	ANNOgesic	TSS	246845	246845	.	+	.	Name=TSS:246845_f;ID=CADEHJ010000001.1_tss125;type=Primary;utr_length=Primary_0;associated_gene=OCPFDLNE_00243;libs=all;method=TSSpredator
CADEHJ010000001.1	ANNOgesic	TSS	247068	247068	.	+	.	Name=TSS:247068_f;ID=CADEHJ010000001.1_tss126;type=Secondary;utr_length=Secondary_224;associated_gene=OCPFDLNE_00245;libs=all;method=TSSpredator
CADEHJ010000001.1	ANNOgesic	TSS	247288	247288	.	+	.	Name=TSS:247288_f;ID=CADEHJ010000001.1_tss127;type=Primary;utr_length=Primary_4;associated_gene=OCPFDLNE_00245;libs=all;method=TSSpredator
CADEHJ010000001.1	ANNOgesic	TSS	252094	252094	.	+	.	Name=TSS:252094_f;ID=CADEHJ010000001.1_tss128;type=Primary;utr_length=Primary_3;associated_gene=OCPFDLNE_00247;libs=all;method=TSSpredator
CADEHJ010000001.1	ANNOgesic	TSS	252765	252765	.	+	.	Name=TSS:252765_f;ID=CADEHJ010000001.1_tss129;type=Primary,Internal;utr_length=Primary_61,Internal_NA;associated_gene=OCPFDLNE_00249,OCPFDLNE_00248;libs=all;method=TSSpredator
CADEHJ010000001.1	ANNOgesic	TSS	253933	253933	.	+	.	Name=TSS:253933_f;ID=CADEHJ010000001.1_tss130;type=Internal;utr_length=Internal_NA;associated_gene=OCPFDLNE_00250;libs=all;method=TSSpredator
CADEHJ010000001.1	ANNOgesic	TSS	254263	254263	.	+	.	Name=TSS:254263_f;ID=CADEHJ010000001.1_tss131;type=Primary,Internal;utr_length=Primary_129,Internal_NA;associated_gene=OCPFDLNE_00251,OCPFDLNE_00250;libs=all;method=TSSpredator
CADEHJ010000001.1	ANNOgesic	TSS	256752	256752	.	+	.	Name=TSS:256752_f;ID=CADEHJ010000001.1_tss132;type=Secondary,Internal;utr_length=Secondary_248,Internal_NA;associated_gene=OCPFDLNE_00252,OCPFDLNE_00251;libs=all;method=TSSpredator
CADEHJ010000001.1	ANNOgesic	TSS	256978	256978	.	+	.	Name=TSS:256978_f;ID=CADEHJ010000001.1_tss133;type=Primary;utr_length=Primary_22;associated_gene=OCPFDLNE_00252;libs=all;method=TSSpredator
CADEHJ010000001.1	ANNOgesic	TSS	257803	257803	.	+	.	Name=TSS:257803_f;ID=CADEHJ010000001.1_tss134;type=Internal;utr_length=Internal_NA;associated_gene=OCPFDLNE_00252;libs=all;method=TSSpredator
CADEHJ010000001.1	ANNOgesic	TSS	258441	258441	.	+	.	Name=TSS:258441_f;ID=CADEHJ010000001.1_tss135;type=Primary;utr_length=Primary_66;associated_gene=OCPFDLNE_00253;libs=all;method=TSSpredator
CADEHJ010000001.1	ANNOgesic	TSS	260578	260578	.	-	.	Name=TSS:260578_r;ID=CADEHJ010000001.1_tss136;type=Antisense;utr_length=Antisense_NA;associated_gene=OCPFDLNE_00255;libs=all;method=TSSpredator
CADEHJ010000001.1	ANNOgesic	TSS	262352	262352	.	+	.	Name=TSS:262352_f;ID=CADEHJ010000001.1_tss137;type=Orphan;utr_length=Orphan_NA;associated_gene=orphan;libs=all;method=TSSpredator
CADEHJ010000001.1	ANNOgesic	TSS	265903	265903	.	+	.	Name=TSS:265903_f;ID=CADEHJ010000001.1_tss138;type=Internal;utr_length=Internal_NA;associated_gene=OCPFDLNE_00261;libs=all;method=TSSpredator
CADEHJ010000001.1	ANNOgesic	TSS	267106	267106	.	+	.	Name=TSS:267106_f;ID=CADEHJ010000001.1_tss139;type=Primary;utr_length=Primary_229;associated_gene=OCPFDLNE_00263;libs=all;method=TSSpredator
CADEHJ010000001.1	ANNOgesic	TSS	267554	267554	.	+	.	Name=TSS:267554_f;ID=CADEHJ010000001.1_tss140;type=Primary;utr_length=Primary_90;associated_gene=OCPFDLNE_00264;libs=all;method=TSSpredator
CADEHJ010000001.1	ANNOgesic	TSS	268745	268745	.	+	.	Name=TSS:268745_f;ID=CADEHJ010000001.1_tss141;type=Primary;utr_length=Primary_84;associated_gene=OCPFDLNE_00266;libs=all;method=TSSpredator
CADEHJ010000001.1	ANNOgesic	TSS	270027	270027	.	+	.	Name=TSS:270027_f;ID=CADEHJ010000001.1_tss142;type=Primary;utr_length=Primary_204;associated_gene=OCPFDLNE_00268;libs=all;method=TSSpredator
CADEHJ010000001.1	ANNOgesic	TSS	271303	271303	.	+	.	Name=TSS:271303_f;ID=CADEHJ010000001.1_tss143;type=Primary;utr_length=Primary_27;associated_gene=OCPFDLNE_00270;libs=all;method=TSSpredator
CADEHJ010000001.1	ANNOgesic	TSS	271595	271595	.	+	.	Name=TSS:271595_f;ID=CADEHJ010000001.1_tss144;type=Primary;utr_length=Primary_26;associated_gene=OCPFDLNE_00271;libs=all;method=TSSpredator
CADEHJ010000001.1	ANNOgesic	TSS	272263	272263	.	+	.	Name=TSS:272263_f;ID=CADEHJ010000001.1_tss145;type=Orphan;utr_length=Orphan_NA;associated_gene=orphan;libs=all;method=TSSpredator
CADEHJ010000001.1	ANNOgesic	TSS	273864	273864	.	+	.	Name=TSS:273864_f;ID=CADEHJ010000001.1_tss146;type=Primary;utr_length=Primary_34;associated_gene=OCPFDLNE_00273;libs=all;method=TSSpredator
CADEHJ010000001.1	ANNOgesic	TSS	281687	281687	.	+	.	Name=TSS:281687_f;ID=CADEHJ010000001.1_tss147;type=Orphan;utr_length=Orphan_NA;associated_gene=orphan;libs=all;method=TSSpredator
CADEHJ010000001.1	ANNOgesic	TSS	289543	289543	.	+	.	Name=TSS:289543_f;ID=CADEHJ010000001.1_tss148;type=Primary;utr_length=Primary_20;associated_gene=OCPFDLNE_00281;libs=all;method=TSSpredator
CADEHJ010000001.1	ANNOgesic	TSS	290142	290142	.	+	.	Name=TSS:290142_f;ID=CADEHJ010000001.1_tss149;type=Primary;utr_length=Primary_32;associated_gene=OCPFDLNE_00282;libs=all;method=TSSpredator
CADEHJ010000001.1	ANNOgesic	TSS	293461	293461	.	+	.	Name=TSS:293461_f;ID=CADEHJ010000001.1_tss150;type=Primary;utr_length=Primary_65;associated_gene=OCPFDLNE_00284;libs=all;method=TSSpredator
CADEHJ010000001.1	ANNOgesic	TSS	298887	298887	.	+	.	Name=TSS:298887_f;ID=CADEHJ010000001.1_tss151;type=Primary;utr_length=Primary_27;associated_gene=OCPFDLNE_00287;libs=all;method=TSSpredator
CADEHJ010000001.1	ANNOgesic	TSS	300181	300181	.	+	.	Name=TSS:300181_f;ID=CADEHJ010000001.1_tss152;type=Primary;utr_length=Primary_20;associated_gene=OCPFDLNE_00288;libs=all;method=TSSpredator
CADEHJ010000001.1	ANNOgesic	TSS	301629	301629	.	+	.	Name=TSS:301629_f;ID=CADEHJ010000001.1_tss153;type=Primary;utr_length=Primary_26;associated_gene=OCPFDLNE_00290;libs=all;method=TSSpredator
CADEHJ010000001.1	ANNOgesic	TSS	302555	302555	.	+	.	Name=TSS:302555_f;ID=CADEHJ010000001.1_tss154;type=Internal;utr_length=Internal_NA;associated_gene=OCPFDLNE_00291;libs=all;method=TSSpredator
CADEHJ010000001.1	ANNOgesic	TSS	306387	306387	.	-	.	Name=TSS:306387_r;ID=CADEHJ010000001.1_tss155;type=Primary;utr_length=Primary_44;associated_gene=OCPFDLNE_00293;libs=all;method=TSSpredator
CADEHJ010000001.1	ANNOgesic	TSS	307304	307304	.	-	.	Name=TSS:307304_r;ID=CADEHJ010000001.1_tss156;type=Primary;utr_length=Primary_28;associated_gene=OCPFDLNE_00294;libs=all;method=TSSpredator
CADEHJ010000001.1	ANNOgesic	TSS	307383	307383	.	+	.	Name=TSS:307383_f;ID=CADEHJ010000001.1_tss157;type=Primary;utr_length=Primary_29;associated_gene=OCPFDLNE_00295;libs=all;method=TSSpredator
CADEHJ010000001.1	ANNOgesic	TSS	308723	308723	.	-	.	Name=TSS:308723_r;ID=CADEHJ010000001.1_tss158;type=Primary;utr_length=Primary_109;associated_gene=OCPFDLNE_00296;libs=all;method=TSSpredator
CADEHJ010000001.1	ANNOgesic	TSS	310577	310577	.	-	.	Name=TSS:310577_r;ID=CADEHJ010000001.1_tss159;type=Primary,Antisense;utr_length=Primary_24,Antisense_NA;associated_gene=OCPFDLNE_00298,OCPFDLNE_00299;libs=all;method=TSSpredator
CADEHJ010000001.1	ANNOgesic	TSS	312809	312809	.	-	.	Name=TSS:312809_r;ID=CADEHJ010000001.1_tss160;type=Primary;utr_length=Primary_30;associated_gene=OCPFDLNE_00300;libs=all;method=TSSpredator
CADEHJ010000001.1	ANNOgesic	TSS	313037	313037	.	+	.	Name=TSS:313037_f;ID=CADEHJ010000001.1_tss161;type=Primary;utr_length=Primary_33;associated_gene=OCPFDLNE_00301;libs=all;method=TSSpredator
CADEHJ010000001.1	ANNOgesic	TSS	316720	316720	.	-	.	Name=TSS:316720_r;ID=CADEHJ010000001.1_tss162;type=Primary;utr_length=Primary_27;associated_gene=OCPFDLNE_00303;libs=all;method=TSSpredator
CADEHJ010000001.1	ANNOgesic	TSS	316761	316761	.	-	.	Name=TSS:316761_r;ID=CADEHJ010000001.1_tss163;type=Secondary;utr_length=Secondary_68;associated_gene=OCPFDLNE_00303;libs=all;method=TSSpredator
CADEHJ010000001.1	ANNOgesic	TSS	320488	320488	.	-	.	Name=TSS:320488_r;ID=CADEHJ010000001.1_tss164;type=Primary;utr_length=Primary_253;associated_gene=OCPFDLNE_00307;libs=all;method=TSSpredator
CADEHJ010000001.1	ANNOgesic	TSS	320590	320590	.	+	.	Name=TSS:320590_f;ID=CADEHJ010000001.1_tss165;type=Primary;utr_length=Primary_28;associated_gene=OCPFDLNE_00308;libs=all;method=TSSpredator
CADEHJ010000001.1	ANNOgesic	TSS	321874	321874	.	+	.	Name=TSS:321874_f;ID=CADEHJ010000001.1_tss166;type=Primary;utr_length=Primary_138;associated_gene=OCPFDLNE_00309;libs=all;method=TSSpredator
CADEHJ010000001.1	ANNOgesic	TSS	322876	322876	.	+	.	Name=TSS:322876_f;ID=CADEHJ010000001.1_tss167;type=Primary;utr_length=Primary_34;associated_gene=OCPFDLNE_00310;libs=all;method=TSSpredator
CADEHJ010000001.1	ANNOgesic	TSS	325744	325744	.	+	.	Name=TSS:325744_f;ID=CADEHJ010000001.1_tss168;type=Internal;utr_length=Internal_NA;associated_gene=OCPFDLNE_00311;libs=all;method=TSSpredator
CADEHJ010000001.1	ANNOgesic	TSS	326996	326996	.	+	.	Name=TSS:326996_f;ID=CADEHJ010000001.1_tss169;type=Primary;utr_length=Primary_27;associated_gene=OCPFDLNE_00313;libs=all;method=TSSpredator
CADEHJ010000001.1	ANNOgesic	TSS	327479	327479	.	+	.	Name=TSS:327479_f;ID=CADEHJ010000001.1_tss170;type=Internal;utr_length=Internal_NA;associated_gene=OCPFDLNE_00313;libs=all;method=TSSpredator
CADEHJ010000001.1	ANNOgesic	TSS	327916	327916	.	+	.	Name=TSS:327916_f;ID=CADEHJ010000001.1_tss171;type=Primary;utr_length=Primary_35;associated_gene=OCPFDLNE_00314;libs=all;method=TSSpredator
CADEHJ010000001.1	ANNOgesic	TSS	330106	330106	.	+	.	Name=TSS:330106_f;ID=CADEHJ010000001.1_tss172;type=Primary;utr_length=Primary_25;associated_gene=OCPFDLNE_00315;libs=all;method=TSSpredator
CADEHJ010000001.1	ANNOgesic	TSS	335115	335115	.	-	.	Name=TSS:335115_r;ID=CADEHJ010000001.1_tss173;type=Primary;utr_length=Primary_28;associated_gene=OCPFDLNE_00319;libs=all;method=TSSpredator
CADEHJ010000001.1	ANNOgesic	TSS	338559	338559	.	-	.	Name=TSS:338559_r;ID=CADEHJ010000001.1_tss174;type=Primary;utr_length=Primary_23;associated_gene=OCPFDLNE_00323;libs=all;method=TSSpredator
CADEHJ010000001.1	ANNOgesic	TSS	338686	338686	.	+	.	Name=TSS:338686_f;ID=CADEHJ010000001.1_tss175;type=Primary;utr_length=Primary_173;associated_gene=OCPFDLNE_00324;libs=all;method=TSSpredator
CADEHJ010000001.1	ANNOgesic	TSS	344764	344764	.	+	.	Name=TSS:344764_f;ID=CADEHJ010000001.1_tss176;type=Primary,Internal;utr_length=Primary_255,Internal_NA;associated_gene=OCPFDLNE_00328,OCPFDLNE_00327;libs=all;method=TSSpredator
CADEHJ010000001.1	ANNOgesic	TSS	346060	346060	.	+	.	Name=TSS:346060_f;ID=CADEHJ010000001.1_tss177;type=Primary;utr_length=Primary_39;associated_gene=OCPFDLNE_00330;libs=all;method=TSSpredator
CADEHJ010000001.1	ANNOgesic	TSS	349785	349785	.	+	.	Name=TSS:349785_f;ID=CADEHJ010000001.1_tss178;type=Primary;utr_length=Primary_200;associated_gene=OCPFDLNE_00334;libs=all;method=TSSpredator
CADEHJ010000001.1	ANNOgesic	TSS	354478	354478	.	-	.	Name=TSS:354478_r;ID=CADEHJ010000001.1_tss179;type=Primary;utr_length=Primary_135;associated_gene=OCPFDLNE_00338;libs=all;method=TSSpredator
CADEHJ010000001.1	ANNOgesic	TSS	356025	356025	.	+	.	Name=TSS:356025_f;ID=CADEHJ010000001.1_tss180;type=Primary;utr_length=Primary_59;associated_gene=OCPFDLNE_00340;libs=all;method=TSSpredator
CADEHJ010000001.1	ANNOgesic	TSS	358170	358170	.	-	.	Name=TSS:358170_r;ID=CADEHJ010000001.1_tss181;type=Primary;utr_length=Primary_34;associated_gene=OCPFDLNE_00342;libs=all;method=TSSpredator
CADEHJ010000001.1	ANNOgesic	TSS	358930	358930	.	+	.	Name=TSS:358930_f;ID=CADEHJ010000001.1_tss182;type=Primary;utr_length=Primary_104;associated_gene=OCPFDLNE_00344;libs=all;method=TSSpredator
CADEHJ010000001.1	ANNOgesic	TSS	366393	366393	.	-	.	Name=TSS:366393_r;ID=CADEHJ010000001.1_tss183;type=Internal;utr_length=Internal_NA;associated_gene=OCPFDLNE_00348;libs=all;method=TSSpredator
CADEHJ010000001.1	ANNOgesic	TSS	368181	368181	.	-	.	Name=TSS:368181_r;ID=CADEHJ010000001.1_tss184;type=Primary;utr_length=Primary_59;associated_gene=OCPFDLNE_00348;libs=all;method=TSSpredator
CADEHJ010000001.1	ANNOgesic	TSS	368460	368460	.	+	.	Name=TSS:368460_f;ID=CADEHJ010000001.1_tss185;type=Primary;utr_length=Primary_158;associated_gene=OCPFDLNE_00349;libs=all;method=TSSpredator
CADEHJ010000001.1	ANNOgesic	TSS	374912	374912	.	+	.	Name=TSS:374912_f;ID=CADEHJ010000001.1_tss186;type=Primary;utr_length=Primary_42;associated_gene=OCPFDLNE_00351;libs=all;method=TSSpredator
CADEHJ010000001.1	ANNOgesic	TSS	375665	375665	.	+	.	Name=TSS:375665_f;ID=CADEHJ010000001.1_tss187;type=Primary;utr_length=Primary_30;associated_gene=OCPFDLNE_00352;libs=all;method=TSSpredator
CADEHJ010000001.1	ANNOgesic	TSS	377077	377077	.	+	.	Name=TSS:377077_f;ID=CADEHJ010000001.1_tss188;type=Internal;utr_length=Internal_NA;associated_gene=OCPFDLNE_00354;libs=all;method=TSSpredator
CADEHJ010000001.1	ANNOgesic	TSS	377265	377265	.	+	.	Name=TSS:377265_f;ID=CADEHJ010000001.1_tss189;type=Internal;utr_length=Internal_NA;associated_gene=OCPFDLNE_00354;libs=all;method=TSSpredator
CADEHJ010000001.1	ANNOgesic	TSS	378546	378546	.	+	.	Name=TSS:378546_f;ID=CADEHJ010000001.1_tss190;type=Internal;utr_length=Internal_NA;associated_gene=OCPFDLNE_00357;libs=all;method=TSSpredator
CADEHJ010000001.1	ANNOgesic	TSS	387707	387707	.	-	.	Name=TSS:387707_r;ID=CADEHJ010000001.1_tss191;type=Primary;utr_length=Primary_39;associated_gene=OCPFDLNE_00370;libs=all;method=TSSpredator
CADEHJ010000001.1	ANNOgesic	TSS	387811	387811	.	+	.	Name=TSS:387811_f;ID=CADEHJ010000001.1_tss192;type=Primary;utr_length=Primary_40;associated_gene=OCPFDLNE_00371;libs=all;method=TSSpredator
CADEHJ010000001.1	ANNOgesic	TSS	388845	388845	.	+	.	Name=TSS:388845_f;ID=CADEHJ010000001.1_tss193;type=Internal;utr_length=Internal_NA;associated_gene=OCPFDLNE_00372;libs=all;method=TSSpredator
CADEHJ010000001.1	ANNOgesic	TSS	390692	390692	.	-	.	Name=TSS:390692_r;ID=CADEHJ010000001.1_tss194;type=Primary;utr_length=Primary_26;associated_gene=OCPFDLNE_00373;libs=all;method=TSSpredator
CADEHJ010000001.1	ANNOgesic	TSS	390848	390848	.	+	.	Name=TSS:390848_f;ID=CADEHJ010000001.1_tss195;type=Primary;utr_length=Primary_55;associated_gene=OCPFDLNE_00374;libs=all;method=TSSpredator
CADEHJ010000001.1	ANNOgesic	TSS	392546	392546	.	+	.	Name=TSS:392546_f;ID=CADEHJ010000001.1_tss196;type=Primary;utr_length=Primary_51;associated_gene=OCPFDLNE_00375;libs=all;method=TSSpredator
CADEHJ010000001.1	ANNOgesic	TSS	393771	393771	.	+	.	Name=TSS:393771_f;ID=CADEHJ010000001.1_tss197;type=Primary;utr_length=Primary_42;associated_gene=OCPFDLNE_00376;libs=all;method=TSSpredator
CADEHJ010000001.1	ANNOgesic	TSS	395676	395676	.	+	.	Name=TSS:395676_f;ID=CADEHJ010000001.1_tss198;type=Internal;utr_length=Internal_NA;associated_gene=OCPFDLNE_00378;libs=all;method=TSSpredator
CADEHJ010000001.1	ANNOgesic	TSS	398878	398878	.	+	.	Name=TSS:398878_f;ID=CADEHJ010000001.1_tss199;type=Primary;utr_length=Primary_34;associated_gene=OCPFDLNE_00383;libs=all;method=TSSpredator
CADEHJ010000001.1	ANNOgesic	TSS	402880	402880	.	+	.	Name=TSS:402880_f;ID=CADEHJ010000001.1_tss200;type=Primary;utr_length=Primary_29;associated_gene=OCPFDLNE_00386;libs=all;method=TSSpredator
CADEHJ010000001.1	ANNOgesic	TSS	403473	403473	.	+	.	Name=TSS:403473_f;ID=CADEHJ010000001.1_tss201;type=Primary;utr_length=Primary_42;associated_gene=OCPFDLNE_00387;libs=all;method=TSSpredator
CADEHJ010000001.1	ANNOgesic	TSS	408675	408675	.	+	.	Name=TSS:408675_f;ID=CADEHJ010000001.1_tss202;type=Primary;utr_length=Primary_18;associated_gene=OCPFDLNE_00393;libs=all;method=TSSpredator
CADEHJ010000001.1	ANNOgesic	TSS	409905	409905	.	-	.	Name=TSS:409905_r;ID=CADEHJ010000001.1_tss203;type=Primary,Antisense;utr_length=Primary_59,Antisense_NA;associated_gene=OCPFDLNE_00394,OCPFDLNE_00395;libs=all;method=TSSpredator
CADEHJ010000001.1	ANNOgesic	TSS	409912	409912	.	+	.	Name=TSS:409912_f;ID=CADEHJ010000001.1_tss204;type=Primary,Antisense;utr_length=Primary_36,Antisense_NA;associated_gene=OCPFDLNE_00395,OCPFDLNE_00394;libs=all;method=TSSpredator
CADEHJ010000001.1	ANNOgesic	TSS	413893	413893	.	+	.	Name=TSS:413893_f;ID=CADEHJ010000001.1_tss205;type=Primary;utr_length=Primary_52;associated_gene=OCPFDLNE_00401;libs=all;method=TSSpredator
CADEHJ010000001.1	ANNOgesic	TSS	419269	419269	.	+	.	Name=TSS:419269_f;ID=CADEHJ010000001.1_tss206;type=Primary;utr_length=Primary_35;associated_gene=OCPFDLNE_00405;libs=all;method=TSSpredator
CADEHJ010000001.1	ANNOgesic	TSS	421304	421304	.	-	.	Name=TSS:421304_r;ID=CADEHJ010000001.1_tss207;type=Primary,Antisense;utr_length=Primary_28,Antisense_NA;associated_gene=OCPFDLNE_00407,OCPFDLNE_00408;libs=all;method=TSSpredator
CADEHJ010000001.1	ANNOgesic	TSS	421370	421370	.	+	.	Name=TSS:421370_f;ID=CADEHJ010000001.1_tss208;type=Internal,Antisense;utr_length=Internal_NA,Antisense_NA;associated_gene=OCPFDLNE_00408,OCPFDLNE_00407;libs=all;method=TSSpredator
CADEHJ010000001.1	ANNOgesic	TSS	422195	422195	.	+	.	Name=TSS:422195_f;ID=CADEHJ010000001.1_tss209;type=Primary;utr_length=Primary_45;associated_gene=OCPFDLNE_00409;libs=all;method=TSSpredator
CADEHJ010000001.1	ANNOgesic	TSS	424086	424086	.	+	.	Name=TSS:424086_f;ID=CADEHJ010000001.1_tss210;type=Primary;utr_length=Primary_22;associated_gene=OCPFDLNE_00412;libs=all;method=TSSpredator
CADEHJ010000001.1	ANNOgesic	TSS	424520	424520	.	-	.	Name=TSS:424520_r;ID=CADEHJ010000001.1_tss211;type=Antisense;utr_length=Antisense_NA;associated_gene=OCPFDLNE_00412;libs=all;method=TSSpredator
CADEHJ010000001.1	ANNOgesic	TSS	426110	426110	.	-	.	Name=TSS:426110_r;ID=CADEHJ010000001.1_tss212;type=Primary,Antisense;utr_length=Primary_35,Antisense_NA;associated_gene=OCPFDLNE_00414,OCPFDLNE_00415;libs=all;method=TSSpredator
CADEHJ010000001.1	ANNOgesic	TSS	426182	426182	.	+	.	Name=TSS:426182_f;ID=CADEHJ010000001.1_tss213;type=Primary;utr_length=Primary_21;associated_gene=OCPFDLNE_00415;libs=all;method=TSSpredator
CADEHJ010000001.1	ANNOgesic	TSS	426821	426821	.	+	.	Name=TSS:426821_f;ID=CADEHJ010000001.1_tss214;type=Primary;utr_length=Primary_35;associated_gene=OCPFDLNE_00416;libs=all;method=TSSpredator
CADEHJ010000001.1	ANNOgesic	TSS	430496	430496	.	-	.	Name=TSS:430496_r;ID=CADEHJ010000001.1_tss215;type=Antisense;utr_length=Antisense_NA;associated_gene=OCPFDLNE_00419;libs=all;method=TSSpredator
CADEHJ010000001.1	ANNOgesic	TSS	433475	433475	.	+	.	Name=TSS:433475_f;ID=CADEHJ010000001.1_tss216;type=Primary;utr_length=Primary_27;associated_gene=OCPFDLNE_00421;libs=all;method=TSSpredator
CADEHJ010000001.1	ANNOgesic	TSS	434380	434380	.	+	.	Name=TSS:434380_f;ID=CADEHJ010000001.1_tss217;type=Primary;utr_length=Primary_36;associated_gene=OCPFDLNE_00423;libs=all;method=TSSpredator
CADEHJ010000001.1	ANNOgesic	TSS	435404	435404	.	+	.	Name=TSS:435404_f;ID=CADEHJ010000001.1_tss218;type=Primary,Internal;utr_length=Primary_35,Internal_NA;associated_gene=OCPFDLNE_00424,OCPFDLNE_00423;libs=all;method=TSSpredator
CADEHJ010000001.1	ANNOgesic	TSS	435862	435862	.	+	.	Name=TSS:435862_f;ID=CADEHJ010000001.1_tss219;type=Primary;utr_length=Primary_25;associated_gene=OCPFDLNE_00425;libs=all;method=TSSpredator
CADEHJ010000001.1	ANNOgesic	TSS	436332	436332	.	-	.	Name=TSS:436332_r;ID=CADEHJ010000001.1_tss220;type=Antisense;utr_length=Antisense_NA;associated_gene=OCPFDLNE_00425;libs=all;method=TSSpredator
CADEHJ010000001.1	ANNOgesic	TSS	437936	437936	.	+	.	Name=TSS:437936_f;ID=CADEHJ010000001.1_tss221;type=Internal;utr_length=Internal_NA;associated_gene=OCPFDLNE_00427;libs=all;method=TSSpredator
CADEHJ010000001.1	ANNOgesic	TSS	438924	438924	.	-	.	Name=TSS:438924_r;ID=CADEHJ010000001.1_tss222;type=Antisense;utr_length=Antisense_NA;associated_gene=OCPFDLNE_00427;libs=all;method=TSSpredator
CADEHJ010000001.1	ANNOgesic	TSS	442129	442129	.	+	.	Name=TSS:442129_f;ID=CADEHJ010000001.1_tss223;type=Antisense;utr_length=Antisense_NA;associated_gene=OCPFDLNE_00428;libs=all;method=TSSpredator
CADEHJ010000001.1	ANNOgesic	TSS	442167	442167	.	-	.	Name=TSS:442167_r;ID=CADEHJ010000001.1_tss224;type=Primary;utr_length=Primary_110;associated_gene=OCPFDLNE_00428;libs=all;method=TSSpredator
CADEHJ010000001.1	ANNOgesic	TSS	443158	443158	.	-	.	Name=TSS:443158_r;ID=CADEHJ010000001.1_tss225;type=Primary;utr_length=Primary_23;associated_gene=OCPFDLNE_00429;libs=all;method=TSSpredator
CADEHJ010000001.1	ANNOgesic	TSS	443445	443445	.	+	.	Name=TSS:443445_f;ID=CADEHJ010000001.1_tss226;type=Primary;utr_length=Primary_28;associated_gene=OCPFDLNE_00430;libs=all;method=TSSpredator
CADEHJ010000001.1	ANNOgesic	TSS	444572	444572	.	+	.	Name=TSS:444572_f;ID=CADEHJ010000001.1_tss227;type=Secondary;utr_length=Secondary_222;associated_gene=OCPFDLNE_00432;libs=all;method=TSSpredator
CADEHJ010000001.1	ANNOgesic	TSS	444750	444750	.	+	.	Name=TSS:444750_f;ID=CADEHJ010000001.1_tss228;type=Primary;utr_length=Primary_44;associated_gene=OCPFDLNE_00432;libs=all;method=TSSpredator
CADEHJ010000001.1	ANNOgesic	TSS	447311	447311	.	-	.	Name=TSS:447311_r;ID=CADEHJ010000001.1_tss229;type=Primary;utr_length=Primary_23;associated_gene=OCPFDLNE_00435;libs=all;method=TSSpredator
CADEHJ010000001.1	ANNOgesic	TSS	447435	447435	.	+	.	Name=TSS:447435_f;ID=CADEHJ010000001.1_tss230;type=Antisense;utr_length=Antisense_NA;associated_gene=OCPFDLNE_00436;libs=all;method=TSSpredator
CADEHJ010000001.1	ANNOgesic	TSS	451182	451182	.	-	.	Name=TSS:451182_r;ID=CADEHJ010000001.1_tss231;type=Primary;utr_length=Primary_19;associated_gene=OCPFDLNE_00440;libs=all;method=TSSpredator
CADEHJ010000001.1	ANNOgesic	TSS	452353	452353	.	+	.	Name=TSS:452353_f;ID=CADEHJ010000001.1_tss232;type=Primary;utr_length=Primary_19;associated_gene=OCPFDLNE_00442;libs=all;method=TSSpredator
CADEHJ010000001.1	ANNOgesic	TSS	459784	459784	.	-	.	Name=TSS:459784_r;ID=CADEHJ010000001.1_tss233;type=Primary,Antisense;utr_length=Primary_55,Antisense_NA;associated_gene=OCPFDLNE_00447,OCPFDLNE_00448;libs=all;method=TSSpredator
CADEHJ010000001.1	ANNOgesic	TSS	459820	459820	.	+	.	Name=TSS:459820_f;ID=CADEHJ010000001.1_tss234;type=Primary,Antisense;utr_length=Primary_27,Antisense_NA;associated_gene=OCPFDLNE_00448,OCPFDLNE_00447;libs=all;method=TSSpredator
CADEHJ010000001.1	ANNOgesic	TSS	461418	461418	.	+	.	Name=TSS:461418_f;ID=CADEHJ010000001.1_tss235;type=Orphan;utr_length=Orphan_NA;associated_gene=orphan;libs=all;method=TSSpredator
CADEHJ010000001.1	ANNOgesic	TSS	466818	466818	.	-	.	Name=TSS:466818_r;ID=CADEHJ010000001.1_tss236;type=Primary,Antisense;utr_length=Primary_11,Antisense_NA;associated_gene=OCPFDLNE_00452,OCPFDLNE_00453;libs=all;method=TSSpredator
CADEHJ010000001.1	ANNOgesic	TSS	467998	467998	.	+	.	Name=TSS:467998_f;ID=CADEHJ010000001.1_tss237;type=Internal;utr_length=Internal_NA;associated_gene=OCPFDLNE_00454;libs=all;method=TSSpredator
CADEHJ010000001.1	ANNOgesic	TSS	469930	469930	.	+	.	Name=TSS:469930_f;ID=CADEHJ010000001.1_tss238;type=Primary;utr_length=Primary_32;associated_gene=OCPFDLNE_00456;libs=all;method=TSSpredator
CADEHJ010000001.1	ANNOgesic	TSS	472574	472574	.	-	.	Name=TSS:472574_r;ID=CADEHJ010000001.1_tss239;type=Primary;utr_length=Primary_29;associated_gene=OCPFDLNE_00457;libs=all;method=TSSpredator
CADEHJ010000001.1	ANNOgesic	TSS	472698	472698	.	+	.	Name=TSS:472698_f;ID=CADEHJ010000001.1_tss240;type=Primary;utr_length=Primary_19;associated_gene=OCPFDLNE_00458;libs=all;method=TSSpredator
CADEHJ010000001.1	ANNOgesic	TSS	473142	473142	.	+	.	Name=TSS:473142_f;ID=CADEHJ010000001.1_tss241;type=Primary;utr_length=Primary_26;associated_gene=OCPFDLNE_00459;libs=all;method=TSSpredator
CADEHJ010000001.1	ANNOgesic	TSS	477292	477292	.	+	.	Name=TSS:477292_f;ID=CADEHJ010000001.1_tss242;type=Primary;utr_length=Primary_58;associated_gene=OCPFDLNE_00461;libs=all;method=TSSpredator
CADEHJ010000001.1	ANNOgesic	TSS	478749	478749	.	+	.	Name=TSS:478749_f;ID=CADEHJ010000001.1_tss243;type=Internal;utr_length=Internal_NA;associated_gene=OCPFDLNE_00461;libs=all;method=TSSpredator
CADEHJ010000001.1	ANNOgesic	TSS	483528	483528	.	+	.	Name=TSS:483528_f;ID=CADEHJ010000001.1_tss244;type=Primary;utr_length=Primary_28;associated_gene=OCPFDLNE_00466;libs=all;method=TSSpredator
CADEHJ010000001.1	ANNOgesic	TSS	485791	485791	.	-	.	Name=TSS:485791_r;ID=CADEHJ010000001.1_tss245;type=Primary;utr_length=Primary_26;associated_gene=OCPFDLNE_00468;libs=all;method=TSSpredator
CADEHJ010000001.1	ANNOgesic	TSS	490191	490191	.	-	.	Name=TSS:490191_r;ID=CADEHJ010000001.1_tss246;type=Primary;utr_length=Primary_52;associated_gene=OCPFDLNE_00471;libs=all;method=TSSpredator
CADEHJ010000001.1	ANNOgesic	TSS	490277	490277	.	+	.	Name=TSS:490277_f;ID=CADEHJ010000001.1_tss247;type=Primary;utr_length=Primary_18;associated_gene=OCPFDLNE_00472;libs=all;method=TSSpredator
CADEHJ010000001.1	ANNOgesic	TSS	491986	491986	.	+	.	Name=TSS:491986_f;ID=CADEHJ010000001.1_tss248;type=Primary;utr_length=Primary_38;associated_gene=OCPFDLNE_00473;libs=all;method=TSSpredator
CADEHJ010000001.1	ANNOgesic	TSS	496310	496310	.	+	.	Name=TSS:496310_f;ID=CADEHJ010000001.1_tss249;type=Primary;utr_length=Primary_127;associated_gene=OCPFDLNE_00476;libs=all;method=TSSpredator
CADEHJ010000001.1	ANNOgesic	TSS	498294	498294	.	+	.	Name=TSS:498294_f;ID=CADEHJ010000001.1_tss250;type=Primary;utr_length=Primary_24;associated_gene=OCPFDLNE_00479;libs=all;method=TSSpredator
CADEHJ010000001.1	ANNOgesic	TSS	500136	500136	.	+	.	Name=TSS:500136_f;ID=CADEHJ010000001.1_tss251;type=Primary;utr_length=Primary_33;associated_gene=OCPFDLNE_00480;libs=all;method=TSSpredator
CADEHJ010000001.1	ANNOgesic	TSS	501332	501332	.	+	.	Name=TSS:501332_f;ID=CADEHJ010000001.1_tss252;type=Primary;utr_length=Primary_30;associated_gene=OCPFDLNE_00481;libs=all;method=TSSpredator
CADEHJ010000001.1	ANNOgesic	TSS	503725	503725	.	+	.	Name=TSS:503725_f;ID=CADEHJ010000001.1_tss253;type=Primary;utr_length=Primary_27;associated_gene=OCPFDLNE_00485;libs=all;method=TSSpredator
CADEHJ010000001.1	ANNOgesic	TSS	503977	503977	.	+	.	Name=TSS:503977_f;ID=CADEHJ010000001.1_tss254;type=Primary;utr_length=Primary_37;associated_gene=OCPFDLNE_00486;libs=all;method=TSSpredator
CADEHJ010000001.1	ANNOgesic	TSS	505698	505698	.	-	.	Name=TSS:505698_r;ID=CADEHJ010000001.1_tss255;type=Primary;utr_length=Primary_27;associated_gene=OCPFDLNE_00487;libs=all;method=TSSpredator
CADEHJ010000001.1	ANNOgesic	TSS	507508	507508	.	+	.	Name=TSS:507508_f;ID=CADEHJ010000001.1_tss256;type=Internal;utr_length=Internal_NA;associated_gene=OCPFDLNE_00488;libs=all;method=TSSpredator
CADEHJ010000001.1	ANNOgesic	TSS	508878	508878	.	+	.	Name=TSS:508878_f;ID=CADEHJ010000001.1_tss257;type=Primary;utr_length=Primary_26;associated_gene=OCPFDLNE_00490;libs=all;method=TSSpredator
CADEHJ010000001.1	ANNOgesic	TSS	510671	510671	.	-	.	Name=TSS:510671_r;ID=CADEHJ010000001.1_tss258;type=Primary;utr_length=Primary_33;associated_gene=OCPFDLNE_00491;libs=all;method=TSSpredator
CADEHJ010000001.1	ANNOgesic	TSS	512511	512511	.	-	.	Name=TSS:512511_r;ID=CADEHJ010000001.1_tss259;type=Primary;utr_length=Primary_38;associated_gene=OCPFDLNE_00492;libs=all;method=TSSpredator
CADEHJ010000001.1	ANNOgesic	TSS	512636	512636	.	+	.	Name=TSS:512636_f;ID=CADEHJ010000001.1_tss260;type=Primary;utr_length=Primary_29;associated_gene=OCPFDLNE_00493;libs=all;method=TSSpredator
CADEHJ010000001.1	ANNOgesic	TSS	513298	513298	.	+	.	Name=TSS:513298_f;ID=CADEHJ010000001.1_tss261;type=Primary;utr_length=Primary_146;associated_gene=OCPFDLNE_00494;libs=all;method=TSSpredator
CADEHJ010000001.1	ANNOgesic	TSS	516439	516439	.	+	.	Name=TSS:516439_f;ID=CADEHJ010000001.1_tss262;type=Primary;utr_length=Primary_18;associated_gene=OCPFDLNE_00497;libs=all;method=TSSpredator
CADEHJ010000001.1	ANNOgesic	TSS	518319	518319	.	+	.	Name=TSS:518319_f;ID=CADEHJ010000001.1_tss263;type=Primary;utr_length=Primary_18;associated_gene=OCPFDLNE_00500;libs=all;method=TSSpredator
CADEHJ010000001.1	ANNOgesic	TSS	522810	522810	.	+	.	Name=TSS:522810_f;ID=CADEHJ010000001.1_tss264;type=Internal;utr_length=Internal_NA;associated_gene=OCPFDLNE_00505;libs=all;method=TSSpredator
CADEHJ010000001.1	ANNOgesic	TSS	522918	522918	.	-	.	Name=TSS:522918_r;ID=CADEHJ010000001.1_tss265;type=Antisense;utr_length=Antisense_NA;associated_gene=OCPFDLNE_00505;libs=all;method=TSSpredator
CADEHJ010000001.1	ANNOgesic	TSS	525318	525318	.	+	.	Name=TSS:525318_f;ID=CADEHJ010000001.1_tss266;type=Primary;utr_length=Primary_33;associated_gene=OCPFDLNE_00508;libs=all;method=TSSpredator
CADEHJ010000001.1	ANNOgesic	TSS	526506	526506	.	+	.	Name=TSS:526506_f;ID=CADEHJ010000001.1_tss267;type=Primary;utr_length=Primary_18;associated_gene=OCPFDLNE_LOCUS1;libs=all;method=TSSpredator
CADEHJ010000001.1	ANNOgesic	TSS	527554	527554	.	+	.	Name=TSS:527554_f;ID=CADEHJ010000001.1_tss268;type=Primary;utr_length=Primary_40;associated_gene=OCPFDLNE_00509;libs=all;method=TSSpredator
CADEHJ010000001.1	ANNOgesic	TSS	528255	528255	.	+	.	Name=TSS:528255_f;ID=CADEHJ010000001.1_tss269;type=Primary;utr_length=Primary_24;associated_gene=OCPFDLNE_00510;libs=all;method=TSSpredator
CADEHJ010000001.1	ANNOgesic	TSS	529832	529832	.	-	.	Name=TSS:529832_r;ID=CADEHJ010000001.1_tss270;type=Primary;utr_length=Primary_24;associated_gene=OCPFDLNE_00512;libs=all;method=TSSpredator
CADEHJ010000001.1	ANNOgesic	TSS	532097	532097	.	+	.	Name=TSS:532097_f;ID=CADEHJ010000001.1_tss271;type=Primary;utr_length=Primary_26;associated_gene=OCPFDLNE_00514;libs=all;method=TSSpredator
CADEHJ010000001.1	ANNOgesic	TSS	535105	535105	.	-	.	Name=TSS:535105_r;ID=CADEHJ010000001.1_tss272;type=Primary;utr_length=Primary_135;associated_gene=OCPFDLNE_00516;libs=all;method=TSSpredator
CADEHJ010000001.1	ANNOgesic	TSS	543610	543610	.	+	.	Name=TSS:543610_f;ID=CADEHJ010000001.1_tss273;type=Primary;utr_length=Primary_18;associated_gene=OCPFDLNE_LOCUS2;libs=all;method=TSSpredator
CADEHJ010000001.1	ANNOgesic	TSS	547719	547719	.	+	.	Name=TSS:547719_f;ID=CADEHJ010000001.1_tss274;type=Primary;utr_length=Primary_38;associated_gene=OCPFDLNE_00526;libs=all;method=TSSpredator
CADEHJ010000001.1	ANNOgesic	TSS	551722	551722	.	-	.	Name=TSS:551722_r;ID=CADEHJ010000001.1_tss275;type=Primary;utr_length=Primary_66;associated_gene=OCPFDLNE_00528;libs=all;method=TSSpredator
CADEHJ010000001.1	ANNOgesic	TSS	551842	551842	.	+	.	Name=TSS:551842_f;ID=CADEHJ010000001.1_tss276;type=Primary;utr_length=Primary_16;associated_gene=OCPFDLNE_00529;libs=all;method=TSSpredator
CADEHJ010000001.1	ANNOgesic	TSS	554932	554932	.	-	.	Name=TSS:554932_r;ID=CADEHJ010000001.1_tss277;type=Primary;utr_length=Primary_65;associated_gene=OCPFDLNE_00531;libs=all;method=TSSpredator
CADEHJ010000001.1	ANNOgesic	TSS	557257	557257	.	-	.	Name=TSS:557257_r;ID=CADEHJ010000001.1_tss278;type=Primary;utr_length=Primary_17;associated_gene=OCPFDLNE_00533;libs=all;method=TSSpredator
CADEHJ010000001.1	ANNOgesic	TSS	557341	557341	.	+	.	Name=TSS:557341_f;ID=CADEHJ010000001.1_tss279;type=Secondary;utr_length=Secondary_129;associated_gene=OCPFDLNE_00534;libs=all;method=TSSpredator
CADEHJ010000001.1	ANNOgesic	TSS	557414	557414	.	+	.	Name=TSS:557414_f;ID=CADEHJ010000001.1_tss280;type=Primary;utr_length=Primary_56;associated_gene=OCPFDLNE_00534;libs=all;method=TSSpredator
CADEHJ010000001.1	ANNOgesic	TSS	564659	564659	.	+	.	Name=TSS:564659_f;ID=CADEHJ010000001.1_tss281;type=Primary;utr_length=Primary_30;associated_gene=OCPFDLNE_00539;libs=all;method=TSSpredator
CADEHJ010000001.1	ANNOgesic	TSS	565571	565571	.	+	.	Name=TSS:565571_f;ID=CADEHJ010000001.1_tss282;type=Primary;utr_length=Primary_26;associated_gene=OCPFDLNE_00540;libs=all;method=TSSpredator
CADEHJ010000001.1	ANNOgesic	TSS	568278	568278	.	-	.	Name=TSS:568278_r;ID=CADEHJ010000001.1_tss283;type=Primary;utr_length=Primary_30;associated_gene=OCPFDLNE_00542;libs=all;method=TSSpredator
CADEHJ010000001.1	ANNOgesic	TSS	568377	568377	.	+	.	Name=TSS:568377_f;ID=CADEHJ010000001.1_tss284;type=Primary;utr_length=Primary_43;associated_gene=OCPFDLNE_00543;libs=all;method=TSSpredator
CADEHJ010000001.1	ANNOgesic	TSS	569832	569832	.	+	.	Name=TSS:569832_f;ID=CADEHJ010000001.1_tss285;type=Primary;utr_length=Primary_14;associated_gene=OCPFDLNE_00544;libs=all;method=TSSpredator
CADEHJ010000001.1	ANNOgesic	TSS	573373	573373	.	-	.	Name=TSS:573373_r;ID=CADEHJ010000001.1_tss286;type=Primary;utr_length=Primary_51;associated_gene=OCPFDLNE_00546;libs=all;method=TSSpredator
CADEHJ010000001.1	ANNOgesic	TSS	573462	573462	.	+	.	Name=TSS:573462_f;ID=CADEHJ010000001.1_tss287;type=Primary;utr_length=Primary_98;associated_gene=OCPFDLNE_00547;libs=all;method=TSSpredator
CADEHJ010000001.1	ANNOgesic	TSS	575757	575757	.	-	.	Name=TSS:575757_r;ID=CADEHJ010000001.1_tss288;type=Primary;utr_length=Primary_44;associated_gene=OCPFDLNE_00548;libs=all;method=TSSpredator
CADEHJ010000001.1	ANNOgesic	TSS	581720	581720	.	-	.	Name=TSS:581720_r;ID=CADEHJ010000001.1_tss289;type=Antisense;utr_length=Antisense_NA;associated_gene=OCPFDLNE_00555;libs=all;method=TSSpredator
CADEHJ010000001.1	ANNOgesic	TSS	586743	586743	.	-	.	Name=TSS:586743_r;ID=CADEHJ010000001.1_tss290;type=Primary;utr_length=Primary_22;associated_gene=OCPFDLNE_00560;libs=all;method=TSSpredator
CADEHJ010000001.1	ANNOgesic	TSS	586892	586892	.	+	.	Name=TSS:586892_f;ID=CADEHJ010000001.1_tss291;type=Primary;utr_length=Primary_39;associated_gene=OCPFDLNE_00561;libs=all;method=TSSpredator
CADEHJ010000001.1	ANNOgesic	TSS	589780	589780	.	+	.	Name=TSS:589780_f;ID=CADEHJ010000001.1_tss292;type=Primary;utr_length=Primary_29;associated_gene=OCPFDLNE_00563;libs=all;method=TSSpredator
CADEHJ010000001.1	ANNOgesic	TSS	592324	592324	.	-	.	Name=TSS:592324_r;ID=CADEHJ010000001.1_tss293;type=Primary;utr_length=Primary_30;associated_gene=OCPFDLNE_00565;libs=all;method=TSSpredator
CADEHJ010000001.1	ANNOgesic	TSS	592480	592480	.	+	.	Name=TSS:592480_f;ID=CADEHJ010000001.1_tss294;type=Primary;utr_length=Primary_214;associated_gene=OCPFDLNE_00566;libs=all;method=TSSpredator
CADEHJ010000001.1	ANNOgesic	TSS	592573	592573	.	+	.	Name=TSS:592573_f;ID=CADEHJ010000001.1_tss295;type=Secondary;utr_length=Secondary_121;associated_gene=OCPFDLNE_00566;libs=all;method=TSSpredator
CADEHJ010000001.1	ANNOgesic	TSS	594152	594152	.	-	.	Name=TSS:594152_r;ID=CADEHJ010000001.1_tss296;type=Internal;utr_length=Internal_NA;associated_gene=OCPFDLNE_00567;libs=all;method=TSSpredator
CADEHJ010000001.1	ANNOgesic	TSS	595150	595150	.	-	.	Name=TSS:595150_r;ID=CADEHJ010000001.1_tss297;type=Primary;utr_length=Primary_132;associated_gene=OCPFDLNE_00567;libs=all;method=TSSpredator
CADEHJ010000001.1	ANNOgesic	TSS	595424	595424	.	-	.	Name=TSS:595424_r;ID=CADEHJ010000001.1_tss298;type=Orphan;utr_length=Orphan_NA;associated_gene=orphan;libs=all;method=TSSpredator
CADEHJ010000001.1	ANNOgesic	TSS	601283	601283	.	+	.	Name=TSS:601283_f;ID=CADEHJ010000001.1_tss299;type=Antisense;utr_length=Antisense_NA;associated_gene=OCPFDLNE_00576;libs=all;method=TSSpredator
CADEHJ010000001.1	ANNOgesic	TSS	601924	601924	.	-	.	Name=TSS:601924_r;ID=CADEHJ010000001.1_tss300;type=Primary;utr_length=Primary_30;associated_gene=OCPFDLNE_00576;libs=all;method=TSSpredator
CADEHJ010000001.1	ANNOgesic	TSS	602000	602000	.	+	.	Name=TSS:602000_f;ID=CADEHJ010000001.1_tss301;type=Primary;utr_length=Primary_46;associated_gene=OCPFDLNE_00577;libs=all;method=TSSpredator
CADEHJ010000001.1	ANNOgesic	TSS	603178	603178	.	-	.	Name=TSS:603178_r;ID=CADEHJ010000001.1_tss302;type=Primary,Antisense;utr_length=Primary_24,Antisense_NA;associated_gene=OCPFDLNE_00578,OCPFDLNE_00579;libs=all;method=TSSpredator
CADEHJ010000001.1	ANNOgesic	TSS	605774	605774	.	-	.	Name=TSS:605774_r;ID=CADEHJ010000001.1_tss303;type=Primary;utr_length=Primary_176;associated_gene=OCPFDLNE_00580;libs=all;method=TSSpredator
CADEHJ010000001.1	ANNOgesic	TSS	605891	605891	.	+	.	Name=TSS:605891_f;ID=CADEHJ010000001.1_tss304;type=Primary;utr_length=Primary_23;associated_gene=OCPFDLNE_00581;libs=all;method=TSSpredator
CADEHJ010000001.1	ANNOgesic	TSS	607327	607327	.	+	.	Name=TSS:607327_f;ID=CADEHJ010000001.1_tss305;type=Primary;utr_length=Primary_25;associated_gene=OCPFDLNE_00582;libs=all;method=TSSpredator
CADEHJ010000001.1	ANNOgesic	TSS	611278	611278	.	-	.	Name=TSS:611278_r;ID=CADEHJ010000001.1_tss306;type=Primary;utr_length=Primary_27;associated_gene=OCPFDLNE_00585;libs=all;method=TSSpredator
CADEHJ010000001.1	ANNOgesic	TSS	611377	611377	.	+	.	Name=TSS:611377_f;ID=CADEHJ010000001.1_tss307;type=Primary;utr_length=Primary_39;associated_gene=OCPFDLNE_00586;libs=all;method=TSSpredator
CADEHJ010000001.1	ANNOgesic	TSS	615118	615118	.	-	.	Name=TSS:615118_r;ID=CADEHJ010000001.1_tss308;type=Primary;utr_length=Primary_76;associated_gene=OCPFDLNE_00589;libs=all;method=TSSpredator
CADEHJ010000001.1	ANNOgesic	TSS	615450	615450	.	+	.	Name=TSS:615450_f;ID=CADEHJ010000001.1_tss309;type=Primary;utr_length=Primary_17;associated_gene=OCPFDLNE_00590;libs=all;method=TSSpredator
CADEHJ010000001.1	ANNOgesic	TSS	617866	617866	.	+	.	Name=TSS:617866_f;ID=CADEHJ010000001.1_tss310;type=Primary;utr_length=Primary_47;associated_gene=OCPFDLNE_00591;libs=all;method=TSSpredator
CADEHJ010000001.1	ANNOgesic	TSS	619622	619622	.	+	.	Name=TSS:619622_f;ID=CADEHJ010000001.1_tss311;type=Internal;utr_length=Internal_NA;associated_gene=OCPFDLNE_00592;libs=all;method=TSSpredator
CADEHJ010000001.1	ANNOgesic	TSS	619912	619912	.	+	.	Name=TSS:619912_f;ID=CADEHJ010000001.1_tss312;type=Primary,Internal;utr_length=Primary_213,Internal_NA;associated_gene=OCPFDLNE_00593,OCPFDLNE_00592;libs=all;method=TSSpredator
CADEHJ010000001.1	ANNOgesic	TSS	622577	622577	.	+	.	Name=TSS:622577_f;ID=CADEHJ010000001.1_tss313;type=Internal;utr_length=Internal_NA;associated_gene=OCPFDLNE_00594;libs=all;method=TSSpredator
CADEHJ010000001.1	ANNOgesic	TSS	623720	623720	.	+	.	Name=TSS:623720_f;ID=CADEHJ010000001.1_tss314;type=Primary;utr_length=Primary_30;associated_gene=OCPFDLNE_00595;libs=all;method=TSSpredator
CADEHJ010000001.1	ANNOgesic	TSS	628314	628314	.	+	.	Name=TSS:628314_f;ID=CADEHJ010000001.1_tss315;type=Primary;utr_length=Primary_57;associated_gene=OCPFDLNE_00599;libs=all;method=TSSpredator
CADEHJ010000001.1	ANNOgesic	TSS	628992	628992	.	+	.	Name=TSS:628992_f;ID=CADEHJ010000001.1_tss316;type=Primary;utr_length=Primary_148;associated_gene=OCPFDLNE_00600;libs=all;method=TSSpredator
CADEHJ010000001.1	ANNOgesic	TSS	630711	630711	.	-	.	Name=TSS:630711_r;ID=CADEHJ010000001.1_tss317;type=Internal;utr_length=Internal_NA;associated_gene=OCPFDLNE_00601;libs=all;method=TSSpredator
CADEHJ010000001.1	ANNOgesic	TSS	632602	632602	.	-	.	Name=TSS:632602_r;ID=CADEHJ010000001.1_tss318;type=Primary;utr_length=Primary_223;associated_gene=OCPFDLNE_00602;libs=all;method=TSSpredator
CADEHJ010000001.1	ANNOgesic	TSS	632762	632762	.	+	.	Name=TSS:632762_f;ID=CADEHJ010000001.1_tss319;type=Primary;utr_length=Primary_65;associated_gene=OCPFDLNE_00603;libs=all;method=TSSpredator
CADEHJ010000001.1	ANNOgesic	TSS	635682	635682	.	-	.	Name=TSS:635682_r;ID=CADEHJ010000001.1_tss320;type=Primary;utr_length=Primary_30;associated_gene=OCPFDLNE_00605;libs=all;method=TSSpredator
CADEHJ010000001.1	ANNOgesic	TSS	636402	636402	.	+	.	Name=TSS:636402_f;ID=CADEHJ010000001.1_tss321;type=Primary;utr_length=Primary_68;associated_gene=OCPFDLNE_00607;libs=all;method=TSSpredator
CADEHJ010000001.1	ANNOgesic	TSS	638542	638542	.	+	.	Name=TSS:638542_f;ID=CADEHJ010000001.1_tss322;type=Primary;utr_length=Primary_39;associated_gene=OCPFDLNE_00610;libs=all;method=TSSpredator
CADEHJ010000001.1	ANNOgesic	TSS	639538	639538	.	-	.	Name=TSS:639538_r;ID=CADEHJ010000001.1_tss323;type=Primary;utr_length=Primary_20;associated_gene=OCPFDLNE_00611;libs=all;method=TSSpredator
CADEHJ010000001.1	ANNOgesic	TSS	639941	639941	.	-	.	Name=TSS:639941_r;ID=CADEHJ010000001.1_tss324;type=Primary;utr_length=Primary_27;associated_gene=OCPFDLNE_00612;libs=all;method=TSSpredator
CADEHJ010000001.1	ANNOgesic	TSS	639970	639970	.	+	.	Name=TSS:639970_f;ID=CADEHJ010000001.1_tss325;type=Antisense;utr_length=Antisense_NA;associated_gene=OCPFDLNE_00612;libs=all;method=TSSpredator
CADEHJ010000001.1	ANNOgesic	TSS	641533	641533	.	+	.	Name=TSS:641533_f;ID=CADEHJ010000001.1_tss326;type=Primary;utr_length=Primary_13;associated_gene=OCPFDLNE_00614;libs=all;method=TSSpredator
CADEHJ010000001.1	ANNOgesic	TSS	645664	645664	.	+	.	Name=TSS:645664_f;ID=CADEHJ010000001.1_tss327;type=Primary;utr_length=Primary_26;associated_gene=OCPFDLNE_00617;libs=all;method=TSSpredator
CADEHJ010000001.1	ANNOgesic	TSS	647853	647853	.	-	.	Name=TSS:647853_r;ID=CADEHJ010000001.1_tss328;type=Primary;utr_length=Primary_50;associated_gene=OCPFDLNE_00618;libs=all;method=TSSpredator
CADEHJ010000001.1	ANNOgesic	TSS	648620	648620	.	-	.	Name=TSS:648620_r;ID=CADEHJ010000001.1_tss329;type=Primary;utr_length=Primary_30;associated_gene=OCPFDLNE_00619;libs=all;method=TSSpredator
CADEHJ010000001.1	ANNOgesic	TSS	648738	648738	.	+	.	Name=TSS:648738_f;ID=CADEHJ010000001.1_tss330;type=Primary;utr_length=Primary_105;associated_gene=OCPFDLNE_00620;libs=all;method=TSSpredator
CADEHJ010000001.1	ANNOgesic	TSS	654662	654662	.	-	.	Name=TSS:654662_r;ID=CADEHJ010000001.1_tss331;type=Primary,Antisense;utr_length=Primary_27,Antisense_NA;associated_gene=OCPFDLNE_00626,OCPFDLNE_00627;libs=all;method=TSSpredator
CADEHJ010000001.1	ANNOgesic	TSS	654719	654719	.	+	.	Name=TSS:654719_f;ID=CADEHJ010000001.1_tss332;type=Primary,Antisense;utr_length=Primary_23,Antisense_NA;associated_gene=OCPFDLNE_00627,OCPFDLNE_00626;libs=all;method=TSSpredator
CADEHJ010000001.1	ANNOgesic	TSS	655227	655227	.	+	.	Name=TSS:655227_f;ID=CADEHJ010000001.1_tss333;type=Primary;utr_length=Primary_26;associated_gene=OCPFDLNE_00628;libs=all;method=TSSpredator
CADEHJ010000001.1	ANNOgesic	TSS	656549	656549	.	+	.	Name=TSS:656549_f;ID=CADEHJ010000001.1_tss334;type=Primary;utr_length=Primary_19;associated_gene=OCPFDLNE_00630;libs=all;method=TSSpredator
CADEHJ010000001.1	ANNOgesic	TSS	658356	658356	.	-	.	Name=TSS:658356_r;ID=CADEHJ010000001.1_tss335;type=Primary;utr_length=Primary_15;associated_gene=OCPFDLNE_00633;libs=all;method=TSSpredator
CADEHJ010000001.1	ANNOgesic	TSS	660129	660129	.	-	.	Name=TSS:660129_r;ID=CADEHJ010000001.1_tss336;type=Primary;utr_length=Primary_23;associated_gene=OCPFDLNE_00634;libs=all;method=TSSpredator
CADEHJ010000001.1	ANNOgesic	TSS	660153	660153	.	-	.	Name=TSS:660153_r;ID=CADEHJ010000001.1_tss337;type=Secondary;utr_length=Secondary_47;associated_gene=OCPFDLNE_00634;libs=all;method=TSSpredator
CADEHJ010000001.1	ANNOgesic	TSS	660212	660212	.	+	.	Name=TSS:660212_f;ID=CADEHJ010000001.1_tss338;type=Primary;utr_length=Primary_198;associated_gene=OCPFDLNE_00635;libs=all;method=TSSpredator
CADEHJ010000001.1	ANNOgesic	TSS	665231	665231	.	+	.	Name=TSS:665231_f;ID=CADEHJ010000001.1_tss339;type=Primary;utr_length=Primary_23;associated_gene=OCPFDLNE_00636;libs=all;method=TSSpredator
CADEHJ010000001.1	ANNOgesic	TSS	665557	665557	.	+	.	Name=TSS:665557_f;ID=CADEHJ010000001.1_tss340;type=Primary;utr_length=Primary_34;associated_gene=OCPFDLNE_00637;libs=all;method=TSSpredator
CADEHJ010000001.1	ANNOgesic	TSS	671708	671708	.	+	.	Name=TSS:671708_f;ID=CADEHJ010000001.1_tss341;type=Primary;utr_length=Primary_23;associated_gene=OCPFDLNE_00643;libs=all;method=TSSpredator
CADEHJ010000001.1	ANNOgesic	TSS	674432	674432	.	-	.	Name=TSS:674432_r;ID=CADEHJ010000001.1_tss342;type=Internal;utr_length=Internal_NA;associated_gene=OCPFDLNE_00646;libs=all;method=TSSpredator
CADEHJ010000001.1	ANNOgesic	TSS	676541	676541	.	-	.	Name=TSS:676541_r;ID=CADEHJ010000001.1_tss343;type=Primary;utr_length=Primary_35;associated_gene=OCPFDLNE_00649;libs=all;method=TSSpredator
CADEHJ010000001.1	ANNOgesic	TSS	679897	679897	.	+	.	Name=TSS:679897_f;ID=CADEHJ010000001.1_tss344;type=Internal;utr_length=Internal_NA;associated_gene=OCPFDLNE_00657;libs=all;method=TSSpredator
CADEHJ010000001.1	ANNOgesic	TSS	693125	693125	.	-	.	Name=TSS:693125_r;ID=CADEHJ010000001.1_tss345;type=Antisense;utr_length=Antisense_NA;associated_gene=OCPFDLNE_00678;libs=all;method=TSSpredator
CADEHJ010000001.1	ANNOgesic	TSS	697900	697900	.	+	.	Name=TSS:697900_f;ID=CADEHJ010000001.1_tss346;type=Internal;utr_length=Internal_NA;associated_gene=OCPFDLNE_00681;libs=all;method=TSSpredator
CADEHJ010000001.1	ANNOgesic	TSS	705690	705690	.	+	.	Name=TSS:705690_f;ID=CADEHJ010000001.1_tss347;type=Internal;utr_length=Internal_NA;associated_gene=OCPFDLNE_00688;libs=all;method=TSSpredator
CADEHJ010000001.1	ANNOgesic	TSS	707034	707034	.	-	.	Name=TSS:707034_r;ID=CADEHJ010000001.1_tss348;type=Primary;utr_length=Primary_60;associated_gene=OCPFDLNE_00690;libs=all;method=TSSpredator
CADEHJ010000001.1	ANNOgesic	TSS	708030	708030	.	+	.	Name=TSS:708030_f;ID=CADEHJ010000001.1_tss349;type=Primary;utr_length=Primary_28;associated_gene=OCPFDLNE_00691;libs=all;method=TSSpredator
CADEHJ010000001.1	ANNOgesic	TSS	709815	709815	.	+	.	Name=TSS:709815_f;ID=CADEHJ010000001.1_tss350;type=Primary;utr_length=Primary_39;associated_gene=OCPFDLNE_00693;libs=all;method=TSSpredator
CADEHJ010000001.1	ANNOgesic	TSS	710426	710426	.	+	.	Name=TSS:710426_f;ID=CADEHJ010000001.1_tss351;type=Primary;utr_length=Primary_25;associated_gene=OCPFDLNE_00694;libs=all;method=TSSpredator
CADEHJ010000001.1	ANNOgesic	TSS	713556	713556	.	+	.	Name=TSS:713556_f;ID=CADEHJ010000001.1_tss352;type=Secondary;utr_length=Secondary_54;associated_gene=OCPFDLNE_00696;libs=all;method=TSSpredator
CADEHJ010000001.1	ANNOgesic	TSS	713594	713594	.	+	.	Name=TSS:713594_f;ID=CADEHJ010000001.1_tss353;type=Primary;utr_length=Primary_16;associated_gene=OCPFDLNE_00696;libs=all;method=TSSpredator
CADEHJ010000001.1	ANNOgesic	TSS	714452	714452	.	+	.	Name=TSS:714452_f;ID=CADEHJ010000001.1_tss354;type=Primary;utr_length=Primary_29;associated_gene=OCPFDLNE_00697;libs=all;method=TSSpredator
CADEHJ010000001.1	ANNOgesic	TSS	717042	717042	.	-	.	Name=TSS:717042_r;ID=CADEHJ010000001.1_tss355;type=Primary;utr_length=Primary_51;associated_gene=OCPFDLNE_00698;libs=all;method=TSSpredator
CADEHJ010000001.1	ANNOgesic	TSS	717201	717201	.	+	.	Name=TSS:717201_f;ID=CADEHJ010000001.1_tss356;type=Primary;utr_length=Primary_25;associated_gene=OCPFDLNE_00699;libs=all;method=TSSpredator
CADEHJ010000001.1	ANNOgesic	TSS	717280	717280	.	+	.	Name=TSS:717280_f;ID=CADEHJ010000001.1_tss357;type=Internal;utr_length=Internal_NA;associated_gene=OCPFDLNE_00699;libs=all;method=TSSpredator
CADEHJ010000001.1	ANNOgesic	TSS	719617	719617	.	+	.	Name=TSS:719617_f;ID=CADEHJ010000001.1_tss358;type=Antisense;utr_length=Antisense_NA;associated_gene=OCPFDLNE_00701;libs=all;method=TSSpredator
CADEHJ010000001.1	ANNOgesic	TSS	719948	719948	.	-	.	Name=TSS:719948_r;ID=CADEHJ010000001.1_tss359;type=Primary,Antisense;utr_length=Primary_35,Antisense_NA;associated_gene=OCPFDLNE_00701,OCPFDLNE_00702;libs=all;method=TSSpredator
CADEHJ010000001.1	ANNOgesic	TSS	720438	720438	.	-	.	Name=TSS:720438_r;ID=CADEHJ010000001.1_tss360;type=Antisense;utr_length=Antisense_NA;associated_gene=OCPFDLNE_00702;libs=all;method=TSSpredator
CADEHJ010000001.1	ANNOgesic	TSS	724387	724387	.	+	.	Name=TSS:724387_f;ID=CADEHJ010000001.1_tss361;type=Primary;utr_length=Primary_18;associated_gene=OCPFDLNE_00705;libs=all;method=TSSpredator
CADEHJ010000001.1	ANNOgesic	TSS	724945	724945	.	+	.	Name=TSS:724945_f;ID=CADEHJ010000001.1_tss362;type=Internal;utr_length=Internal_NA;associated_gene=OCPFDLNE_00705;libs=all;method=TSSpredator
CADEHJ010000001.1	ANNOgesic	TSS	725849	725849	.	+	.	Name=TSS:725849_f;ID=CADEHJ010000001.1_tss363;type=Antisense;utr_length=Antisense_NA;associated_gene=OCPFDLNE_00707;libs=all;method=TSSpredator
CADEHJ010000001.1	ANNOgesic	TSS	726557	726557	.	-	.	Name=TSS:726557_r;ID=CADEHJ010000001.1_tss364;type=Primary;utr_length=Primary_50;associated_gene=OCPFDLNE_00707;libs=all;method=TSSpredator
CADEHJ010000001.1	ANNOgesic	TSS	726664	726664	.	+	.	Name=TSS:726664_f;ID=CADEHJ010000001.1_tss365;type=Primary;utr_length=Primary_31;associated_gene=OCPFDLNE_00708;libs=all;method=TSSpredator
CADEHJ010000001.1	ANNOgesic	TSS	728323	728323	.	-	.	Name=TSS:728323_r;ID=CADEHJ010000001.1_tss366;type=Primary,Antisense;utr_length=Primary_37,Antisense_NA;associated_gene=OCPFDLNE_00710,OCPFDLNE_00711;libs=all;method=TSSpredator
CADEHJ010000001.1	ANNOgesic	TSS	728390	728390	.	+	.	Name=TSS:728390_f;ID=CADEHJ010000001.1_tss367;type=Primary;utr_length=Primary_16;associated_gene=OCPFDLNE_00711;libs=all;method=TSSpredator
CADEHJ010000001.1	ANNOgesic	TSS	730475	730475	.	-	.	Name=TSS:730475_r;ID=CADEHJ010000001.1_tss368;type=Primary;utr_length=Primary_80;associated_gene=OCPFDLNE_00713;libs=all;method=TSSpredator
CADEHJ010000001.1	ANNOgesic	TSS	731287	731287	.	-	.	Name=TSS:731287_r;ID=CADEHJ010000001.1_tss369;type=Primary;utr_length=Primary_14;associated_gene=OCPFDLNE_00715;libs=all;method=TSSpredator
CADEHJ010000001.1	ANNOgesic	TSS	733073	733073	.	-	.	Name=TSS:733073_r;ID=CADEHJ010000001.1_tss370;type=Primary;utr_length=Primary_30;associated_gene=OCPFDLNE_00717;libs=all;method=TSSpredator
CADEHJ010000001.1	ANNOgesic	TSS	733189	733189	.	+	.	Name=TSS:733189_f;ID=CADEHJ010000001.1_tss371;type=Primary;utr_length=Primary_28;associated_gene=OCPFDLNE_00718;libs=all;method=TSSpredator
CADEHJ010000001.1	ANNOgesic	TSS	735474	735474	.	-	.	Name=TSS:735474_r;ID=CADEHJ010000001.1_tss372;type=Antisense;utr_length=Antisense_NA;associated_gene=OCPFDLNE_00721;libs=all;method=TSSpredator
CADEHJ010000001.1	ANNOgesic	TSS	736355	736355	.	+	.	Name=TSS:736355_f;ID=CADEHJ010000001.1_tss373;type=Primary;utr_length=Primary_15;associated_gene=OCPFDLNE_00723;libs=all;method=TSSpredator
CADEHJ010000001.1	ANNOgesic	TSS	737665	737665	.	+	.	Name=TSS:737665_f;ID=CADEHJ010000001.1_tss374;type=Primary;utr_length=Primary_34;associated_gene=OCPFDLNE_00726;libs=all;method=TSSpredator
CADEHJ010000001.1	ANNOgesic	TSS	738397	738397	.	+	.	Name=TSS:738397_f;ID=CADEHJ010000001.1_tss375;type=Orphan;utr_length=Orphan_NA;associated_gene=orphan;libs=all;method=TSSpredator
CADEHJ010000001.1	ANNOgesic	TSS	738481	738481	.	+	.	Name=TSS:738481_f;ID=CADEHJ010000001.1_tss376;type=Orphan;utr_length=Orphan_NA;associated_gene=orphan;libs=all;method=TSSpredator
CADEHJ010000001.1	ANNOgesic	TSS	738805	738805	.	+	.	Name=TSS:738805_f;ID=CADEHJ010000001.1_tss377;type=Orphan;utr_length=Orphan_NA;associated_gene=orphan;libs=all;method=TSSpredator
CADEHJ010000001.1	ANNOgesic	TSS	740883	740883	.	-	.	Name=TSS:740883_r;ID=CADEHJ010000001.1_tss378;type=Primary;utr_length=Primary_46;associated_gene=OCPFDLNE_00729;libs=all;method=TSSpredator
CADEHJ010000001.1	ANNOgesic	TSS	742535	742535	.	-	.	Name=TSS:742535_r;ID=CADEHJ010000001.1_tss379;type=Antisense;utr_length=Antisense_NA;associated_gene=OCPFDLNE_00732;libs=all;method=TSSpredator
CADEHJ010000001.1	ANNOgesic	TSS	754936	754936	.	+	.	Name=TSS:754936_f;ID=CADEHJ010000001.1_tss380;type=Primary;utr_length=Primary_48;associated_gene=OCPFDLNE_00745;libs=all;method=TSSpredator
CADEHJ010000001.1	ANNOgesic	TSS	780037	780037	.	+	.	Name=TSS:780037_f;ID=CADEHJ010000001.1_tss381;type=Primary;utr_length=Primary_35;associated_gene=OCPFDLNE_00774;libs=all;method=TSSpredator
CADEHJ010000001.1	ANNOgesic	TSS	781390	781390	.	+	.	Name=TSS:781390_f;ID=CADEHJ010000001.1_tss382;type=Secondary,Antisense;utr_length=Secondary_295,Antisense_NA;associated_gene=OCPFDLNE_00777,OCPFDLNE_00776;libs=all;method=TSSpredator
CADEHJ010000001.1	ANNOgesic	TSS	781563	781563	.	-	.	Name=TSS:781563_r;ID=CADEHJ010000001.1_tss383;type=Primary;utr_length=Primary_149;associated_gene=OCPFDLNE_00776;libs=all;method=TSSpredator
CADEHJ010000001.1	ANNOgesic	TSS	781644	781644	.	+	.	Name=TSS:781644_f;ID=CADEHJ010000001.1_tss384;type=Primary;utr_length=Primary_41;associated_gene=OCPFDLNE_00777;libs=all;method=TSSpredator
CADEHJ010000001.1	ANNOgesic	TSS	783550	783550	.	+	.	Name=TSS:783550_f;ID=CADEHJ010000001.1_tss385;type=Primary;utr_length=Primary_27;associated_gene=OCPFDLNE_00778;libs=all;method=TSSpredator
CADEHJ010000001.1	ANNOgesic	TSS	785556	785556	.	+	.	Name=TSS:785556_f;ID=CADEHJ010000001.1_tss386;type=Internal;utr_length=Internal_NA;associated_gene=OCPFDLNE_00779;libs=all;method=TSSpredator
CADEHJ010000001.1	ANNOgesic	TSS	786402	786402	.	-	.	Name=TSS:786402_r;ID=CADEHJ010000001.1_tss387;type=Primary;utr_length=Primary_24;associated_gene=OCPFDLNE_00780;libs=all;method=TSSpredator
CADEHJ010000001.1	ANNOgesic	TSS	786512	786512	.	+	.	Name=TSS:786512_f;ID=CADEHJ010000001.1_tss388;type=Primary;utr_length=Primary_69;associated_gene=OCPFDLNE_00781;libs=all;method=TSSpredator
CADEHJ010000001.1	ANNOgesic	TSS	788723	788723	.	+	.	Name=TSS:788723_f;ID=CADEHJ010000001.1_tss389;type=Primary;utr_length=Primary_19;associated_gene=OCPFDLNE_00783;libs=all;method=TSSpredator
CADEHJ010000001.1	ANNOgesic	TSS	789533	789533	.	+	.	Name=TSS:789533_f;ID=CADEHJ010000001.1_tss390;type=Primary;utr_length=Primary_32;associated_gene=OCPFDLNE_00784;libs=all;method=TSSpredator
CADEHJ010000001.1	ANNOgesic	TSS	793855	793855	.	+	.	Name=TSS:793855_f;ID=CADEHJ010000001.1_tss391;type=Primary;utr_length=Primary_29;associated_gene=OCPFDLNE_00788;libs=all;method=TSSpredator
CADEHJ010000001.1	ANNOgesic	TSS	795592	795592	.	-	.	Name=TSS:795592_r;ID=CADEHJ010000001.1_tss392;type=Primary;utr_length=Primary_37;associated_gene=OCPFDLNE_00789;libs=all;method=TSSpredator
CADEHJ010000001.1	ANNOgesic	TSS	797764	797764	.	-	.	Name=TSS:797764_r;ID=CADEHJ010000001.1_tss393;type=Antisense;utr_length=Antisense_NA;associated_gene=OCPFDLNE_00792;libs=all;method=TSSpredator
CADEHJ010000001.1	ANNOgesic	TSS	799160	799160	.	+	.	Name=TSS:799160_f;ID=CADEHJ010000001.1_tss394;type=Internal;utr_length=Internal_NA;associated_gene=OCPFDLNE_00793;libs=all;method=TSSpredator
CADEHJ010000001.1	ANNOgesic	TSS	801802	801802	.	-	.	Name=TSS:801802_r;ID=CADEHJ010000001.1_tss395;type=Primary;utr_length=Primary_30;associated_gene=OCPFDLNE_00795;libs=all;method=TSSpredator
CADEHJ010000001.1	ANNOgesic	TSS	807265	807265	.	+	.	Name=TSS:807265_f;ID=CADEHJ010000001.1_tss396;type=Primary;utr_length=Primary_27;associated_gene=OCPFDLNE_00802;libs=all;method=TSSpredator
CADEHJ010000001.1	ANNOgesic	TSS	809666	809666	.	+	.	Name=TSS:809666_f;ID=CADEHJ010000001.1_tss397;type=Primary;utr_length=Primary_33;associated_gene=OCPFDLNE_00806;libs=all;method=TSSpredator
CADEHJ010000001.1	ANNOgesic	TSS	810431	810431	.	+	.	Name=TSS:810431_f;ID=CADEHJ010000001.1_tss398;type=Primary;utr_length=Primary_29;associated_gene=OCPFDLNE_00807;libs=all;method=TSSpredator
CADEHJ010000001.1	ANNOgesic	TSS	813958	813958	.	+	.	Name=TSS:813958_f;ID=CADEHJ010000001.1_tss399;type=Primary;utr_length=Primary_26;associated_gene=OCPFDLNE_00811;libs=all;method=TSSpredator
CADEHJ010000001.1	ANNOgesic	TSS	814520	814520	.	+	.	Name=TSS:814520_f;ID=CADEHJ010000001.1_tss400;type=Internal;utr_length=Internal_NA;associated_gene=OCPFDLNE_00811;libs=all;method=TSSpredator
CADEHJ010000001.1	ANNOgesic	TSS	817121	817121	.	+	.	Name=TSS:817121_f;ID=CADEHJ010000001.1_tss401;type=Primary;utr_length=Primary_282;associated_gene=OCPFDLNE_00815;libs=all;method=TSSpredator
CADEHJ010000001.1	ANNOgesic	TSS	820888	820888	.	-	.	Name=TSS:820888_r;ID=CADEHJ010000001.1_tss402;type=Antisense;utr_length=Antisense_NA;associated_gene=OCPFDLNE_00818;libs=all;method=TSSpredator
CADEHJ010000001.1	ANNOgesic	TSS	824682	824682	.	+	.	Name=TSS:824682_f;ID=CADEHJ010000001.1_tss403;type=Internal;utr_length=Internal_NA;associated_gene=OCPFDLNE_00821;libs=all;method=TSSpredator
CADEHJ010000001.1	ANNOgesic	TSS	825888	825888	.	+	.	Name=TSS:825888_f;ID=CADEHJ010000001.1_tss404;type=Internal;utr_length=Internal_NA;associated_gene=OCPFDLNE_00822;libs=all;method=TSSpredator
CADEHJ010000001.1	ANNOgesic	TSS	827302	827302	.	-	.	Name=TSS:827302_r;ID=CADEHJ010000001.1_tss405;type=Primary;utr_length=Primary_26;associated_gene=OCPFDLNE_00823;libs=all;method=TSSpredator
CADEHJ010000001.1	ANNOgesic	TSS	827412	827412	.	+	.	Name=TSS:827412_f;ID=CADEHJ010000001.1_tss406;type=Primary;utr_length=Primary_24;associated_gene=OCPFDLNE_00824;libs=all;method=TSSpredator
CADEHJ010000001.1	ANNOgesic	TSS	828818	828818	.	+	.	Name=TSS:828818_f;ID=CADEHJ010000001.1_tss407;type=Internal,Antisense;utr_length=Internal_NA,Antisense_NA;associated_gene=OCPFDLNE_00825,OCPFDLNE_00826;libs=all;method=TSSpredator
CADEHJ010000001.1	ANNOgesic	TSS	830014	830014	.	+	.	Name=TSS:830014_f;ID=CADEHJ010000001.1_tss408;type=Primary;utr_length=Primary_65;associated_gene=OCPFDLNE_00827;libs=all;method=TSSpredator
CADEHJ010000001.1	ANNOgesic	TSS	832310	832310	.	-	.	Name=TSS:832310_r;ID=CADEHJ010000001.1_tss409;type=Primary;utr_length=Primary_25;associated_gene=OCPFDLNE_00829;libs=all;method=TSSpredator
CADEHJ010000001.1	ANNOgesic	TSS	832409	832409	.	+	.	Name=TSS:832409_f;ID=CADEHJ010000001.1_tss410;type=Primary;utr_length=Primary_30;associated_gene=OCPFDLNE_00830;libs=all;method=TSSpredator
CADEHJ010000001.1	ANNOgesic	TSS	833206	833206	.	+	.	Name=TSS:833206_f;ID=CADEHJ010000001.1_tss411;type=Primary;utr_length=Primary_78;associated_gene=OCPFDLNE_00831;libs=all;method=TSSpredator
CADEHJ010000001.1	ANNOgesic	TSS	834332	834332	.	-	.	Name=TSS:834332_r;ID=CADEHJ010000001.1_tss412;type=Primary;utr_length=Primary_37;associated_gene=OCPFDLNE_00832;libs=all;method=TSSpredator
CADEHJ010000001.1	ANNOgesic	TSS	837969	837969	.	-	.	Name=TSS:837969_r;ID=CADEHJ010000001.1_tss413;type=Primary;utr_length=Primary_197;associated_gene=OCPFDLNE_00837;libs=all;method=TSSpredator
CADEHJ010000001.1	ANNOgesic	TSS	841823	841823	.	+	.	Name=TSS:841823_f;ID=CADEHJ010000001.1_tss414;type=Primary;utr_length=Primary_74;associated_gene=OCPFDLNE_00840;libs=all;method=TSSpredator
CADEHJ010000001.1	ANNOgesic	TSS	843390	843390	.	+	.	Name=TSS:843390_f;ID=CADEHJ010000001.1_tss415;type=Primary;utr_length=Primary_148;associated_gene=OCPFDLNE_00841;libs=all;method=TSSpredator
CADEHJ010000001.1	ANNOgesic	TSS	849448	849448	.	+	.	Name=TSS:849448_f;ID=CADEHJ010000001.1_tss416;type=Primary,Antisense;utr_length=Primary_29,Antisense_NA;associated_gene=OCPFDLNE_00844,OCPFDLNE_00843;libs=all;method=TSSpredator
CADEHJ010000001.1	ANNOgesic	TSS	850205	850205	.	+	.	Name=TSS:850205_f;ID=CADEHJ010000001.1_tss417;type=Primary;utr_length=Primary_26;associated_gene=OCPFDLNE_00845;libs=all;method=TSSpredator
CADEHJ010000001.1	ANNOgesic	TSS	851635	851635	.	-	.	Name=TSS:851635_r;ID=CADEHJ010000001.1_tss418;type=Internal;utr_length=Internal_NA;associated_gene=OCPFDLNE_00846;libs=all;method=TSSpredator
CADEHJ010000001.1	ANNOgesic	TSS	851882	851882	.	-	.	Name=TSS:851882_r;ID=CADEHJ010000001.1_tss419;type=Primary;utr_length=Primary_25;associated_gene=OCPFDLNE_00846;libs=all;method=TSSpredator
CADEHJ010000001.1	ANNOgesic	TSS	852659	852659	.	-	.	Name=TSS:852659_r;ID=CADEHJ010000001.1_tss420;type=Primary;utr_length=Primary_46;associated_gene=OCPFDLNE_00847;libs=all;method=TSSpredator
CADEHJ010000001.1	ANNOgesic	TSS	853646	853646	.	-	.	Name=TSS:853646_r;ID=CADEHJ010000001.1_tss421;type=Primary;utr_length=Primary_29;associated_gene=OCPFDLNE_00848;libs=all;method=TSSpredator
CADEHJ010000001.1	ANNOgesic	TSS	854293	854293	.	-	.	Name=TSS:854293_r;ID=CADEHJ010000001.1_tss422;type=Primary;utr_length=Primary_39;associated_gene=OCPFDLNE_00849;libs=all;method=TSSpredator
CADEHJ010000001.1	ANNOgesic	TSS	854379	854379	.	-	.	Name=TSS:854379_r;ID=CADEHJ010000001.1_tss423;type=Secondary;utr_length=Secondary_125;associated_gene=OCPFDLNE_00849;libs=all;method=TSSpredator
CADEHJ010000001.1	ANNOgesic	TSS	854493	854493	.	+	.	Name=TSS:854493_f;ID=CADEHJ010000001.1_tss424;type=Primary;utr_length=Primary_16;associated_gene=OCPFDLNE_00850;libs=all;method=TSSpredator
CADEHJ010000001.1	ANNOgesic	TSS	856786	856786	.	-	.	Name=TSS:856786_r;ID=CADEHJ010000001.1_tss425;type=Orphan;utr_length=Orphan_NA;associated_gene=orphan;libs=all;method=TSSpredator
CADEHJ010000001.1	ANNOgesic	TSS	856796	856796	.	-	.	Name=TSS:856796_r;ID=CADEHJ010000001.1_tss426;type=Orphan;utr_length=Orphan_NA;associated_gene=orphan;libs=all;method=TSSpredator
CADEHJ010000001.1	ANNOgesic	TSS	857627	857627	.	-	.	Name=TSS:857627_r;ID=CADEHJ010000001.1_tss427;type=Primary;utr_length=Primary_28;associated_gene=OCPFDLNE_00852;libs=all;method=TSSpredator
CADEHJ010000001.1	ANNOgesic	TSS	857738	857738	.	+	.	Name=TSS:857738_f;ID=CADEHJ010000001.1_tss428;type=Primary;utr_length=Primary_14;associated_gene=OCPFDLNE_00853;libs=all;method=TSSpredator
CADEHJ010000001.1	ANNOgesic	TSS	858226	858226	.	+	.	Name=TSS:858226_f;ID=CADEHJ010000001.1_tss429;type=Primary;utr_length=Primary_31;associated_gene=OCPFDLNE_00854;libs=all;method=TSSpredator
CADEHJ010000001.1	ANNOgesic	TSS	860023	860023	.	+	.	Name=TSS:860023_f;ID=CADEHJ010000001.1_tss430;type=Internal;utr_length=Internal_NA;associated_gene=OCPFDLNE_00855;libs=all;method=TSSpredator
CADEHJ010000001.1	ANNOgesic	TSS	862098	862098	.	-	.	Name=TSS:862098_r;ID=CADEHJ010000001.1_tss431;type=Primary;utr_length=Primary_28;associated_gene=OCPFDLNE_00857;libs=all;method=TSSpredator
CADEHJ010000001.1	ANNOgesic	TSS	866801	866801	.	+	.	Name=TSS:866801_f;ID=CADEHJ010000001.1_tss432;type=Orphan;utr_length=Orphan_NA;associated_gene=orphan;libs=all;method=TSSpredator
CADEHJ010000001.1	ANNOgesic	TSS	868499	868499	.	+	.	Name=TSS:868499_f;ID=CADEHJ010000001.1_tss433;type=Primary;utr_length=Primary_15;associated_gene=OCPFDLNE_00865;libs=all;method=TSSpredator
CADEHJ010000001.1	ANNOgesic	TSS	872347	872347	.	+	.	Name=TSS:872347_f;ID=CADEHJ010000001.1_tss434;type=Primary;utr_length=Primary_155;associated_gene=OCPFDLNE_00867;libs=all;method=TSSpredator
CADEHJ010000001.1	ANNOgesic	TSS	872561	872561	.	-	.	Name=TSS:872561_r;ID=CADEHJ010000001.1_tss435;type=Antisense;utr_length=Antisense_NA;associated_gene=OCPFDLNE_00867;libs=all;method=TSSpredator
CADEHJ010000001.1	ANNOgesic	TSS	874326	874326	.	+	.	Name=TSS:874326_f;ID=CADEHJ010000001.1_tss436;type=Primary;utr_length=Primary_31;associated_gene=OCPFDLNE_00868;libs=all;method=TSSpredator
CADEHJ010000001.1	ANNOgesic	TSS	875099	875099	.	+	.	Name=TSS:875099_f;ID=CADEHJ010000001.1_tss437;type=Primary;utr_length=Primary_27;associated_gene=OCPFDLNE_00869;libs=all;method=TSSpredator
CADEHJ010000001.1	ANNOgesic	TSS	875772	875772	.	+	.	Name=TSS:875772_f;ID=CADEHJ010000001.1_tss438;type=Primary;utr_length=Primary_34;associated_gene=OCPFDLNE_00870;libs=all;method=TSSpredator
CADEHJ010000001.1	ANNOgesic	TSS	876731	876731	.	+	.	Name=TSS:876731_f;ID=CADEHJ010000001.1_tss439;type=Primary;utr_length=Primary_32;associated_gene=OCPFDLNE_00871;libs=all;method=TSSpredator
CADEHJ010000001.1	ANNOgesic	TSS	879465	879465	.	+	.	Name=TSS:879465_f;ID=CADEHJ010000001.1_tss440;type=Primary;utr_length=Primary_90;associated_gene=OCPFDLNE_00875;libs=all;method=TSSpredator
CADEHJ010000001.1	ANNOgesic	TSS	881153	881153	.	+	.	Name=TSS:881153_f;ID=CADEHJ010000001.1_tss441;type=Internal;utr_length=Internal_NA;associated_gene=OCPFDLNE_00875;libs=all;method=TSSpredator
CADEHJ010000001.1	ANNOgesic	TSS	883132	883132	.	+	.	Name=TSS:883132_f;ID=CADEHJ010000001.1_tss442;type=Primary;utr_length=Primary_26;associated_gene=OCPFDLNE_00877;libs=all;method=TSSpredator
CADEHJ010000001.1	ANNOgesic	TSS	884894	884894	.	+	.	Name=TSS:884894_f;ID=CADEHJ010000001.1_tss443;type=Primary,Antisense;utr_length=Primary_26,Antisense_NA;associated_gene=OCPFDLNE_00880,OCPFDLNE_00879;libs=all;method=TSSpredator
CADEHJ010000001.1	ANNOgesic	TSS	885804	885804	.	+	.	Name=TSS:885804_f;ID=CADEHJ010000001.1_tss444;type=Primary;utr_length=Primary_17;associated_gene=OCPFDLNE_00881;libs=all;method=TSSpredator
CADEHJ010000001.1	ANNOgesic	TSS	890059	890059	.	+	.	Name=TSS:890059_f;ID=CADEHJ010000001.1_tss445;type=Primary;utr_length=Primary_37;associated_gene=OCPFDLNE_00884;libs=all;method=TSSpredator
CADEHJ010000001.1	ANNOgesic	TSS	893861	893861	.	-	.	Name=TSS:893861_r;ID=CADEHJ010000001.1_tss446;type=Orphan;utr_length=Orphan_NA;associated_gene=orphan;libs=all;method=TSSpredator
CADEHJ010000001.1	ANNOgesic	TSS	895981	895981	.	-	.	Name=TSS:895981_r;ID=CADEHJ010000001.1_tss447;type=Primary;utr_length=Primary_27;associated_gene=OCPFDLNE_00885;libs=all;method=TSSpredator
CADEHJ010000001.1	ANNOgesic	TSS	897052	897052	.	-	.	Name=TSS:897052_r;ID=CADEHJ010000001.1_tss448;type=Primary;utr_length=Primary_73;associated_gene=OCPFDLNE_00886;libs=all;method=TSSpredator
CADEHJ010000001.1	ANNOgesic	TSS	898966	898966	.	-	.	Name=TSS:898966_r;ID=CADEHJ010000001.1_tss449;type=Antisense;utr_length=Antisense_NA;associated_gene=OCPFDLNE_00888;libs=all;method=TSSpredator
CADEHJ010000001.1	ANNOgesic	TSS	901351	901351	.	-	.	Name=TSS:901351_r;ID=CADEHJ010000001.1_tss450;type=Primary;utr_length=Primary_39;associated_gene=OCPFDLNE_00891;libs=all;method=TSSpredator
CADEHJ010000001.1	ANNOgesic	TSS	901374	901374	.	+	.	Name=TSS:901374_f;ID=CADEHJ010000001.1_tss451;type=Primary,Antisense;utr_length=Primary_111,Antisense_NA;associated_gene=OCPFDLNE_00892,OCPFDLNE_00891;libs=all;method=TSSpredator
CADEHJ010000001.1	ANNOgesic	TSS	906759	906759	.	-	.	Name=TSS:906759_r;ID=CADEHJ010000001.1_tss452;type=Primary;utr_length=Primary_26;associated_gene=OCPFDLNE_00895;libs=all;method=TSSpredator
CADEHJ010000001.1	ANNOgesic	TSS	906911	906911	.	+	.	Name=TSS:906911_f;ID=CADEHJ010000001.1_tss453;type=Primary;utr_length=Primary_28;associated_gene=OCPFDLNE_00896;libs=all;method=TSSpredator
CADEHJ010000001.1	ANNOgesic	TSS	910026	910026	.	+	.	Name=TSS:910026_f;ID=CADEHJ010000001.1_tss454;type=Primary;utr_length=Primary_18;associated_gene=OCPFDLNE_00897;libs=all;method=TSSpredator
CADEHJ010000001.1	ANNOgesic	TSS	916598	916598	.	+	.	Name=TSS:916598_f;ID=CADEHJ010000001.1_tss455;type=Primary,Antisense;utr_length=Primary_26,Antisense_NA;associated_gene=OCPFDLNE_00899,OCPFDLNE_00898;libs=all;method=TSSpredator
CADEHJ010000001.1	ANNOgesic	TSS	917055	917055	.	+	.	Name=TSS:917055_f;ID=CADEHJ010000001.1_tss456;type=Primary;utr_length=Primary_203;associated_gene=OCPFDLNE_00900;libs=all;method=TSSpredator
CADEHJ010000001.1	ANNOgesic	TSS	918446	918446	.	+	.	Name=TSS:918446_f;ID=CADEHJ010000001.1_tss457;type=Primary;utr_length=Primary_20;associated_gene=OCPFDLNE_00901;libs=all;method=TSSpredator
CADEHJ010000001.1	ANNOgesic	TSS	923821	923821	.	-	.	Name=TSS:923821_r;ID=CADEHJ010000001.1_tss458;type=Primary;utr_length=Primary_26;associated_gene=OCPFDLNE_00904;libs=all;method=TSSpredator
CADEHJ010000001.1	ANNOgesic	TSS	924288	924288	.	+	.	Name=TSS:924288_f;ID=CADEHJ010000001.1_tss459;type=Secondary;utr_length=Secondary_41;associated_gene=OCPFDLNE_00905;libs=all;method=TSSpredator
CADEHJ010000001.1	ANNOgesic	TSS	924310	924310	.	+	.	Name=TSS:924310_f;ID=CADEHJ010000001.1_tss460;type=Primary;utr_length=Primary_19;associated_gene=OCPFDLNE_00905;libs=all;method=TSSpredator
CADEHJ010000001.1	ANNOgesic	TSS	924683	924683	.	+	.	Name=TSS:924683_f;ID=CADEHJ010000001.1_tss461;type=Primary;utr_length=Primary_47;associated_gene=OCPFDLNE_00906;libs=all;method=TSSpredator
CADEHJ010000001.1	ANNOgesic	TSS	925541	925541	.	+	.	Name=TSS:925541_f;ID=CADEHJ010000001.1_tss462;type=Primary;utr_length=Primary_27;associated_gene=OCPFDLNE_00907;libs=all;method=TSSpredator
CADEHJ010000001.1	ANNOgesic	TSS	926929	926929	.	+	.	Name=TSS:926929_f;ID=CADEHJ010000001.1_tss463;type=Primary;utr_length=Primary_24;associated_gene=OCPFDLNE_00910;libs=all;method=TSSpredator
CADEHJ010000001.1	ANNOgesic	TSS	929501	929501	.	+	.	Name=TSS:929501_f;ID=CADEHJ010000001.1_tss464;type=Primary,Internal;utr_length=Primary_68,Internal_NA;associated_gene=OCPFDLNE_00912,OCPFDLNE_00911;libs=all;method=TSSpredator
CADEHJ010000001.1	ANNOgesic	TSS	931344	931344	.	-	.	Name=TSS:931344_r;ID=CADEHJ010000001.1_tss465;type=Primary;utr_length=Primary_25;associated_gene=OCPFDLNE_00913;libs=all;method=TSSpredator
CADEHJ010000001.1	ANNOgesic	TSS	939985	939985	.	+	.	Name=TSS:939985_f;ID=CADEHJ010000001.1_tss466;type=Primary;utr_length=Primary_277;associated_gene=OCPFDLNE_00921;libs=all;method=TSSpredator
CADEHJ010000001.1	ANNOgesic	TSS	943445	943445	.	+	.	Name=TSS:943445_f;ID=CADEHJ010000001.1_tss467;type=Primary,Antisense;utr_length=Primary_14,Antisense_NA;associated_gene=OCPFDLNE_00924,OCPFDLNE_00923;libs=all;method=TSSpredator
CADEHJ010000001.1	ANNOgesic	TSS	945244	945244	.	-	.	Name=TSS:945244_r;ID=CADEHJ010000001.1_tss468;type=Primary,Antisense;utr_length=Primary_74,Antisense_NA;associated_gene=OCPFDLNE_00926,OCPFDLNE_00927;libs=all;method=TSSpredator
CADEHJ010000001.1	ANNOgesic	TSS	953293	953293	.	+	.	Name=TSS:953293_f;ID=CADEHJ010000001.1_tss469;type=Primary;utr_length=Primary_27;associated_gene=OCPFDLNE_00935;libs=all;method=TSSpredator
CADEHJ010000001.1	ANNOgesic	TSS	955244	955244	.	-	.	Name=TSS:955244_r;ID=CADEHJ010000001.1_tss470;type=Primary;utr_length=Primary_16;associated_gene=OCPFDLNE_00936;libs=all;method=TSSpredator
CADEHJ010000001.1	ANNOgesic	TSS	955340	955340	.	+	.	Name=TSS:955340_f;ID=CADEHJ010000001.1_tss471;type=Primary;utr_length=Primary_23;associated_gene=OCPFDLNE_00937;libs=all;method=TSSpredator
CADEHJ010000001.1	ANNOgesic	TSS	957425	957425	.	+	.	Name=TSS:957425_f;ID=CADEHJ010000001.1_tss472;type=Primary;utr_length=Primary_37;associated_gene=OCPFDLNE_00939;libs=all;method=TSSpredator
CADEHJ010000001.1	ANNOgesic	TSS	960373	960373	.	+	.	Name=TSS:960373_f;ID=CADEHJ010000001.1_tss473;type=Secondary;utr_length=Secondary_157;associated_gene=OCPFDLNE_00942;libs=all;method=TSSpredator
CADEHJ010000001.1	ANNOgesic	TSS	960494	960494	.	+	.	Name=TSS:960494_f;ID=CADEHJ010000001.1_tss474;type=Primary;utr_length=Primary_36;associated_gene=OCPFDLNE_00942;libs=all;method=TSSpredator
CADEHJ010000001.1	ANNOgesic	TSS	963929	963929	.	-	.	Name=TSS:963929_r;ID=CADEHJ010000001.1_tss475;type=Antisense;utr_length=Antisense_NA;associated_gene=OCPFDLNE_00947;libs=all;method=TSSpredator
CADEHJ010000001.1	ANNOgesic	TSS	964164	964164	.	+	.	Name=TSS:964164_f;ID=CADEHJ010000001.1_tss476;type=Primary;utr_length=Primary_29;associated_gene=OCPFDLNE_00948;libs=all;method=TSSpredator
CADEHJ010000001.1	ANNOgesic	TSS	965450	965450	.	+	.	Name=TSS:965450_f;ID=CADEHJ010000001.1_tss477;type=Internal;utr_length=Internal_NA;associated_gene=OCPFDLNE_00950;libs=all;method=TSSpredator
CADEHJ010000001.1	ANNOgesic	TSS	968233	968233	.	+	.	Name=TSS:968233_f;ID=CADEHJ010000001.1_tss478;type=Primary;utr_length=Primary_28;associated_gene=OCPFDLNE_00953;libs=all;method=TSSpredator
CADEHJ010000001.1	ANNOgesic	TSS	970947	970947	.	+	.	Name=TSS:970947_f;ID=CADEHJ010000001.1_tss479;type=Primary;utr_length=Primary_10;associated_gene=OCPFDLNE_00955;libs=all;method=TSSpredator
CADEHJ010000001.1	ANNOgesic	TSS	971030	971030	.	+	.	Name=TSS:971030_f;ID=CADEHJ010000001.1_tss480;type=Primary,Internal;utr_length=Primary_3,Internal_NA;associated_gene=OCPFDLNE_00956,OCPFDLNE_00955;libs=all;method=TSSpredator
CADEHJ010000001.1	ANNOgesic	TSS	971221	971221	.	+	.	Name=TSS:971221_f;ID=CADEHJ010000001.1_tss481;type=Primary;utr_length=Primary_53;associated_gene=OCPFDLNE_00957;libs=all;method=TSSpredator
CADEHJ010000001.1	ANNOgesic	TSS	972244	972244	.	+	.	Name=TSS:972244_f;ID=CADEHJ010000001.1_tss482;type=Primary;utr_length=Primary_26;associated_gene=OCPFDLNE_00959;libs=all;method=TSSpredator
CADEHJ010000001.1	ANNOgesic	TSS	974131	974131	.	+	.	Name=TSS:974131_f;ID=CADEHJ010000001.1_tss483;type=Primary;utr_length=Primary_44;associated_gene=OCPFDLNE_00961;libs=all;method=TSSpredator
CADEHJ010000001.1	ANNOgesic	TSS	975029	975029	.	+	.	Name=TSS:975029_f;ID=CADEHJ010000001.1_tss484;type=Primary;utr_length=Primary_57;associated_gene=OCPFDLNE_00962;libs=all;method=TSSpredator
CADEHJ010000001.1	ANNOgesic	TSS	975342	975342	.	+	.	Name=TSS:975342_f;ID=CADEHJ010000001.1_tss485;type=Primary;utr_length=Primary_42;associated_gene=OCPFDLNE_00964;libs=all;method=TSSpredator
CADEHJ010000001.1	ANNOgesic	TSS	975853	975853	.	+	.	Name=TSS:975853_f;ID=CADEHJ010000001.1_tss486;type=Primary;utr_length=Primary_26;associated_gene=OCPFDLNE_00965;libs=all;method=TSSpredator
CADEHJ010000001.1	ANNOgesic	TSS	976634	976634	.	+	.	Name=TSS:976634_f;ID=CADEHJ010000001.1_tss487;type=Primary;utr_length=Primary_50;associated_gene=OCPFDLNE_00966;libs=all;method=TSSpredator
CADEHJ010000001.1	ANNOgesic	TSS	980479	980479	.	-	.	Name=TSS:980479_r;ID=CADEHJ010000001.1_tss488;type=Primary;utr_length=Primary_31;associated_gene=OCPFDLNE_00969;libs=all;method=TSSpredator
CADEHJ010000001.1	ANNOgesic	TSS	980565	980565	.	+	.	Name=TSS:980565_f;ID=CADEHJ010000001.1_tss489;type=Primary;utr_length=Primary_24;associated_gene=OCPFDLNE_00970;libs=all;method=TSSpredator
CADEHJ010000001.1	ANNOgesic	TSS	982116	982116	.	+	.	Name=TSS:982116_f;ID=CADEHJ010000001.1_tss490;type=Primary;utr_length=Primary_54;associated_gene=OCPFDLNE_00972;libs=all;method=TSSpredator
CADEHJ010000001.1	ANNOgesic	TSS	982747	982747	.	+	.	Name=TSS:982747_f;ID=CADEHJ010000001.1_tss491;type=Primary;utr_length=Primary_40;associated_gene=OCPFDLNE_00973;libs=all;method=TSSpredator
CADEHJ010000001.1	ANNOgesic	TSS	983775	983775	.	+	.	Name=TSS:983775_f;ID=CADEHJ010000001.1_tss492;type=Primary;utr_length=Primary_48;associated_gene=OCPFDLNE_00974;libs=all;method=TSSpredator
CADEHJ010000001.1	ANNOgesic	TSS	985407	985407	.	+	.	Name=TSS:985407_f;ID=CADEHJ010000001.1_tss493;type=Primary;utr_length=Primary_25;associated_gene=OCPFDLNE_00975;libs=all;method=TSSpredator
CADEHJ010000001.1	ANNOgesic	TSS	990893	990893	.	+	.	Name=TSS:990893_f;ID=CADEHJ010000001.1_tss494;type=Primary;utr_length=Primary_207;associated_gene=OCPFDLNE_00980;libs=all;method=TSSpredator
CADEHJ010000001.1	ANNOgesic	TSS	992760	992760	.	+	.	Name=TSS:992760_f;ID=CADEHJ010000001.1_tss495;type=Primary;utr_length=Primary_33;associated_gene=OCPFDLNE_00981;libs=all;method=TSSpredator
CADEHJ010000001.1	ANNOgesic	TSS	994734	994734	.	+	.	Name=TSS:994734_f;ID=CADEHJ010000001.1_tss496;type=Primary;utr_length=Primary_46;associated_gene=OCPFDLNE_00983;libs=all;method=TSSpredator
CADEHJ010000001.1	ANNOgesic	TSS	998722	998722	.	+	.	Name=TSS:998722_f;ID=CADEHJ010000001.1_tss497;type=Antisense;utr_length=Antisense_NA;associated_gene=OCPFDLNE_00987;libs=all;method=TSSpredator
CADEHJ010000001.1	ANNOgesic	TSS	1000430	1000430	.	-	.	Name=TSS:1000430_r;ID=CADEHJ010000001.1_tss498;type=Primary;utr_length=Primary_105;associated_gene=OCPFDLNE_00987;libs=all;method=TSSpredator
CADEHJ010000001.1	ANNOgesic	TSS	1001030	1001030	.	+	.	Name=TSS:1001030_f;ID=CADEHJ010000001.1_tss499;type=Primary,Internal;utr_length=Primary_285,Internal_NA;associated_gene=OCPFDLNE_00989,OCPFDLNE_00988;libs=all;method=TSSpredator
CADEHJ010000001.1	ANNOgesic	TSS	1002069	1002069	.	+	.	Name=TSS:1002069_f;ID=CADEHJ010000001.1_tss500;type=Primary;utr_length=Primary_30;associated_gene=OCPFDLNE_00990;libs=all;method=TSSpredator
CADEHJ010000001.1	ANNOgesic	TSS	1004524	1004524	.	-	.	Name=TSS:1004524_r;ID=CADEHJ010000001.1_tss501;type=Primary;utr_length=Primary_30;associated_gene=OCPFDLNE_00992;libs=all;method=TSSpredator
CADEHJ010000001.1	ANNOgesic	TSS	1005726	1005726	.	-	.	Name=TSS:1005726_r;ID=CADEHJ010000001.1_tss502;type=Primary;utr_length=Primary_160;associated_gene=OCPFDLNE_00993;libs=all;method=TSSpredator
CADEHJ010000001.1	ANNOgesic	TSS	1005776	1005776	.	-	.	Name=TSS:1005776_r;ID=CADEHJ010000001.1_tss503;type=Secondary;utr_length=Secondary_210;associated_gene=OCPFDLNE_00993;libs=all;method=TSSpredator
CADEHJ010000001.1	ANNOgesic	TSS	1005907	1005907	.	+	.	Name=TSS:1005907_f;ID=CADEHJ010000001.1_tss504;type=Primary;utr_length=Primary_30;associated_gene=OCPFDLNE_00994;libs=all;method=TSSpredator
CADEHJ010000001.1	ANNOgesic	TSS	1006838	1006838	.	+	.	Name=TSS:1006838_f;ID=CADEHJ010000001.1_tss505;type=Internal;utr_length=Internal_NA;associated_gene=OCPFDLNE_00995;libs=all;method=TSSpredator
CADEHJ010000001.1	ANNOgesic	TSS	1008775	1008775	.	-	.	Name=TSS:1008775_r;ID=CADEHJ010000001.1_tss506;type=Primary;utr_length=Primary_34;associated_gene=OCPFDLNE_00998;libs=all;method=TSSpredator
CADEHJ010000001.1	ANNOgesic	TSS	1010060	1010060	.	-	.	Name=TSS:1010060_r;ID=CADEHJ010000001.1_tss507;type=Primary;utr_length=Primary_14;associated_gene=OCPFDLNE_01000;libs=all;method=TSSpredator
CADEHJ010000001.1	ANNOgesic	TSS	1012956	1012956	.	-	.	Name=TSS:1012956_r;ID=CADEHJ010000001.1_tss508;type=Primary;utr_length=Primary_29;associated_gene=OCPFDLNE_01002;libs=all;method=TSSpredator
CADEHJ010000001.1	ANNOgesic	TSS	1013044	1013044	.	+	.	Name=TSS:1013044_f;ID=CADEHJ010000001.1_tss509;type=Secondary;utr_length=Secondary_86;associated_gene=OCPFDLNE_01003;libs=all;method=TSSpredator
CADEHJ010000001.1	ANNOgesic	TSS	1013094	1013094	.	+	.	Name=TSS:1013094_f;ID=CADEHJ010000001.1_tss510;type=Primary;utr_length=Primary_36;associated_gene=OCPFDLNE_01003;libs=all;method=TSSpredator
CADEHJ010000001.1	ANNOgesic	TSS	1013739	1013739	.	+	.	Name=TSS:1013739_f;ID=CADEHJ010000001.1_tss511;type=Secondary;utr_length=Secondary_94;associated_gene=OCPFDLNE_01004;libs=all;method=TSSpredator
CADEHJ010000001.1	ANNOgesic	TSS	1013793	1013793	.	+	.	Name=TSS:1013793_f;ID=CADEHJ010000001.1_tss512;type=Primary;utr_length=Primary_40;associated_gene=OCPFDLNE_01004;libs=all;method=TSSpredator
CADEHJ010000001.1	ANNOgesic	TSS	1014231	1014231	.	+	.	Name=TSS:1014231_f;ID=CADEHJ010000001.1_tss513;type=Primary;utr_length=Primary_17;associated_gene=OCPFDLNE_01005;libs=all;method=TSSpredator
CADEHJ010000001.1	ANNOgesic	TSS	1015694	1015694	.	+	.	Name=TSS:1015694_f;ID=CADEHJ010000001.1_tss514;type=Orphan;utr_length=Orphan_NA;associated_gene=orphan;libs=all;method=TSSpredator
CADEHJ010000001.1	ANNOgesic	TSS	1017819	1017819	.	+	.	Name=TSS:1017819_f;ID=CADEHJ010000001.1_tss515;type=Primary;utr_length=Primary_20;associated_gene=OCPFDLNE_01009;libs=all;method=TSSpredator
CADEHJ010000001.1	ANNOgesic	TSS	1020554	1020554	.	-	.	Name=TSS:1020554_r;ID=CADEHJ010000001.1_tss516;type=Primary;utr_length=Primary_28;associated_gene=OCPFDLNE_01011;libs=all;method=TSSpredator
CADEHJ010000001.1	ANNOgesic	TSS	1020656	1020656	.	+	.	Name=TSS:1020656_f;ID=CADEHJ010000001.1_tss517;type=Primary;utr_length=Primary_28;associated_gene=OCPFDLNE_01012;libs=all;method=TSSpredator
CADEHJ010000001.1	ANNOgesic	TSS	1021212	1021212	.	+	.	Name=TSS:1021212_f;ID=CADEHJ010000001.1_tss518;type=Primary;utr_length=Primary_24;associated_gene=OCPFDLNE_01013;libs=all;method=TSSpredator
CADEHJ010000001.1	ANNOgesic	TSS	1021565	1021565	.	+	.	Name=TSS:1021565_f;ID=CADEHJ010000001.1_tss519;type=Primary;utr_length=Primary_131;associated_gene=OCPFDLNE_01014;libs=all;method=TSSpredator
CADEHJ010000001.1	ANNOgesic	TSS	1021645	1021645	.	+	.	Name=TSS:1021645_f;ID=CADEHJ010000001.1_tss520;type=Secondary;utr_length=Secondary_51;associated_gene=OCPFDLNE_01014;libs=all;method=TSSpredator
CADEHJ010000001.1	ANNOgesic	TSS	1022988	1022988	.	+	.	Name=TSS:1022988_f;ID=CADEHJ010000001.1_tss521;type=Primary;utr_length=Primary_72;associated_gene=OCPFDLNE_01016;libs=all;method=TSSpredator
CADEHJ010000001.1	ANNOgesic	TSS	1024446	1024446	.	+	.	Name=TSS:1024446_f;ID=CADEHJ010000001.1_tss522;type=Internal;utr_length=Internal_NA;associated_gene=OCPFDLNE_01017;libs=all;method=TSSpredator
CADEHJ010000001.1	ANNOgesic	TSS	1025742	1025742	.	+	.	Name=TSS:1025742_f;ID=CADEHJ010000001.1_tss523;type=Primary;utr_length=Primary_29;associated_gene=OCPFDLNE_01019;libs=all;method=TSSpredator
CADEHJ010000001.1	ANNOgesic	TSS	1026908	1026908	.	+	.	Name=TSS:1026908_f;ID=CADEHJ010000001.1_tss524;type=Primary;utr_length=Primary_31;associated_gene=OCPFDLNE_01020;libs=all;method=TSSpredator
CADEHJ010000001.1	ANNOgesic	TSS	1029144	1029144	.	+	.	Name=TSS:1029144_f;ID=CADEHJ010000001.1_tss525;type=Primary;utr_length=Primary_27;associated_gene=OCPFDLNE_01022;libs=all;method=TSSpredator
CADEHJ010000001.1	ANNOgesic	TSS	1030739	1030739	.	-	.	Name=TSS:1030739_r;ID=CADEHJ010000001.1_tss526;type=Internal,Antisense;utr_length=Internal_NA,Antisense_NA;associated_gene=OCPFDLNE_01024,OCPFDLNE_01023;libs=all;method=TSSpredator
CADEHJ010000001.1	ANNOgesic	TSS	1031643	1031643	.	-	.	Name=TSS:1031643_r;ID=CADEHJ010000001.1_tss527;type=Primary;utr_length=Primary_125;associated_gene=OCPFDLNE_01024;libs=all;method=TSSpredator
CADEHJ010000001.1	ANNOgesic	TSS	1032859	1032859	.	-	.	Name=TSS:1032859_r;ID=CADEHJ010000001.1_tss528;type=Primary;utr_length=Primary_35;associated_gene=OCPFDLNE_01026;libs=all;method=TSSpredator
CADEHJ010000001.1	ANNOgesic	TSS	1032939	1032939	.	+	.	Name=TSS:1032939_f;ID=CADEHJ010000001.1_tss529;type=Primary;utr_length=Primary_44;associated_gene=OCPFDLNE_01027;libs=all;method=TSSpredator
CADEHJ010000001.1	ANNOgesic	TSS	1035428	1035428	.	+	.	Name=TSS:1035428_f;ID=CADEHJ010000001.1_tss530;type=Primary;utr_length=Primary_36;associated_gene=OCPFDLNE_01030;libs=all;method=TSSpredator
CADEHJ010000001.1	ANNOgesic	TSS	1039915	1039915	.	+	.	Name=TSS:1039915_f;ID=CADEHJ010000001.1_tss531;type=Antisense;utr_length=Antisense_NA;associated_gene=OCPFDLNE_01034;libs=all;method=TSSpredator
CADEHJ010000001.1	ANNOgesic	TSS	1040771	1040771	.	-	.	Name=TSS:1040771_r;ID=CADEHJ010000001.1_tss532;type=Primary;utr_length=Primary_59;associated_gene=OCPFDLNE_01035;libs=all;method=TSSpredator
CADEHJ010000001.1	ANNOgesic	TSS	1040878	1040878	.	+	.	Name=TSS:1040878_f;ID=CADEHJ010000001.1_tss533;type=Primary;utr_length=Primary_42;associated_gene=OCPFDLNE_01036;libs=all;method=TSSpredator
CADEHJ010000001.1	ANNOgesic	TSS	1041556	1041556	.	+	.	Name=TSS:1041556_f;ID=CADEHJ010000001.1_tss534;type=Internal,Antisense;utr_length=Internal_NA,Antisense_NA;associated_gene=OCPFDLNE_01036,OCPFDLNE_01037;libs=all;method=TSSpredator
CADEHJ010000001.1	ANNOgesic	TSS	1042898	1042898	.	-	.	Name=TSS:1042898_r;ID=CADEHJ010000001.1_tss535;type=Primary;utr_length=Primary_58;associated_gene=OCPFDLNE_01038;libs=all;method=TSSpredator
CADEHJ010000001.1	ANNOgesic	TSS	1043019	1043019	.	+	.	Name=TSS:1043019_f;ID=CADEHJ010000001.1_tss536;type=Primary;utr_length=Primary_40;associated_gene=OCPFDLNE_01039;libs=all;method=TSSpredator
CADEHJ010000001.1	ANNOgesic	TSS	1047317	1047317	.	-	.	Name=TSS:1047317_r;ID=CADEHJ010000001.1_tss537;type=Primary;utr_length=Primary_21;associated_gene=OCPFDLNE_01042;libs=all;method=TSSpredator
CADEHJ010000001.1	ANNOgesic	TSS	1047407	1047407	.	+	.	Name=TSS:1047407_f;ID=CADEHJ010000001.1_tss538;type=Primary;utr_length=Primary_29;associated_gene=OCPFDLNE_01043;libs=all;method=TSSpredator
CADEHJ010000001.1	ANNOgesic	TSS	1049097	1049097	.	+	.	Name=TSS:1049097_f;ID=CADEHJ010000001.1_tss539;type=Primary;utr_length=Primary_18;associated_gene=OCPFDLNE_01045;libs=all;method=TSSpredator
CADEHJ010000001.1	ANNOgesic	TSS	1051803	1051803	.	+	.	Name=TSS:1051803_f;ID=CADEHJ010000001.1_tss540;type=Primary;utr_length=Primary_29;associated_gene=OCPFDLNE_01049;libs=all;method=TSSpredator
CADEHJ010000001.1	ANNOgesic	TSS	1053479	1053479	.	+	.	Name=TSS:1053479_f;ID=CADEHJ010000001.1_tss541;type=Primary;utr_length=Primary_28;associated_gene=OCPFDLNE_01050;libs=all;method=TSSpredator
CADEHJ010000001.1	ANNOgesic	TSS	1055404	1055404	.	+	.	Name=TSS:1055404_f;ID=CADEHJ010000001.1_tss542;type=Primary;utr_length=Primary_223;associated_gene=OCPFDLNE_01052;libs=all;method=TSSpredator
CADEHJ010000001.1	ANNOgesic	TSS	1055865	1055865	.	-	.	Name=TSS:1055865_r;ID=CADEHJ010000001.1_tss543;type=Antisense;utr_length=Antisense_NA;associated_gene=OCPFDLNE_01052;libs=all;method=TSSpredator
CADEHJ010000001.1	ANNOgesic	TSS	1056483	1056483	.	+	.	Name=TSS:1056483_f;ID=CADEHJ010000001.1_tss544;type=Primary;utr_length=Primary_14;associated_gene=OCPFDLNE_01053;libs=all;method=TSSpredator
CADEHJ010000001.1	ANNOgesic	TSS	1057569	1057569	.	+	.	Name=TSS:1057569_f;ID=CADEHJ010000001.1_tss545;type=Internal;utr_length=Internal_NA;associated_gene=OCPFDLNE_01054;libs=all;method=TSSpredator
CADEHJ010000001.1	ANNOgesic	TSS	1059118	1059118	.	-	.	Name=TSS:1059118_r;ID=CADEHJ010000001.1_tss546;type=Primary;utr_length=Primary_27;associated_gene=OCPFDLNE_01055;libs=all;method=TSSpredator
CADEHJ010000001.1	ANNOgesic	TSS	1059349	1059349	.	-	.	Name=TSS:1059349_r;ID=CADEHJ010000001.1_tss547;type=Secondary,Internal;utr_length=Secondary_258,Internal_NA;associated_gene=OCPFDLNE_01055,OCPFDLNE_01056;libs=all;method=TSSpredator
CADEHJ010000001.1	ANNOgesic	TSS	1060192	1060192	.	-	.	Name=TSS:1060192_r;ID=CADEHJ010000001.1_tss548;type=Primary;utr_length=Primary_40;associated_gene=OCPFDLNE_01056;libs=all;method=TSSpredator
CADEHJ010000001.1	ANNOgesic	TSS	1060312	1060312	.	+	.	Name=TSS:1060312_f;ID=CADEHJ010000001.1_tss549;type=Primary;utr_length=Primary_27;associated_gene=OCPFDLNE_01057;libs=all;method=TSSpredator
CADEHJ010000001.1	ANNOgesic	TSS	1063911	1063911	.	+	.	Name=TSS:1063911_f;ID=CADEHJ010000001.1_tss550;type=Primary;utr_length=Primary_17;associated_gene=OCPFDLNE_01060;libs=all;method=TSSpredator
CADEHJ010000001.1	ANNOgesic	TSS	1066591	1066591	.	-	.	Name=TSS:1066591_r;ID=CADEHJ010000001.1_tss551;type=Primary;utr_length=Primary_11;associated_gene=OCPFDLNE_01062;libs=all;method=TSSpredator
CADEHJ010000001.1	ANNOgesic	TSS	1066809	1066809	.	+	.	Name=TSS:1066809_f;ID=CADEHJ010000001.1_tss552;type=Primary;utr_length=Primary_78;associated_gene=OCPFDLNE_01063;libs=all;method=TSSpredator
CADEHJ010000001.1	ANNOgesic	TSS	1069014	1069014	.	-	.	Name=TSS:1069014_r;ID=CADEHJ010000001.1_tss553;type=Internal;utr_length=Internal_NA;associated_gene=OCPFDLNE_01065;libs=all;method=TSSpredator
CADEHJ010000001.1	ANNOgesic	TSS	1069058	1069058	.	+	.	Name=TSS:1069058_f;ID=CADEHJ010000001.1_tss554;type=Antisense;utr_length=Antisense_NA;associated_gene=OCPFDLNE_01065;libs=all;method=TSSpredator
CADEHJ010000001.1	ANNOgesic	TSS	1070097	1070097	.	-	.	Name=TSS:1070097_r;ID=CADEHJ010000001.1_tss555;type=Primary;utr_length=Primary_15;associated_gene=OCPFDLNE_01066;libs=all;method=TSSpredator
CADEHJ010000001.1	ANNOgesic	TSS	1073508	1073508	.	+	.	Name=TSS:1073508_f;ID=CADEHJ010000001.1_tss556;type=Primary;utr_length=Primary_60;associated_gene=OCPFDLNE_01070;libs=all;method=TSSpredator
CADEHJ010000001.1	ANNOgesic	TSS	1073957	1073957	.	+	.	Name=TSS:1073957_f;ID=CADEHJ010000001.1_tss557;type=Primary;utr_length=Primary_137;associated_gene=OCPFDLNE_01071;libs=all;method=TSSpredator
CADEHJ010000001.1	ANNOgesic	TSS	1074451	1074451	.	+	.	Name=TSS:1074451_f;ID=CADEHJ010000001.1_tss558;type=Primary;utr_length=Primary_77;associated_gene=OCPFDLNE_01072;libs=all;method=TSSpredator
CADEHJ010000001.1	ANNOgesic	TSS	1075875	1075875	.	+	.	Name=TSS:1075875_f;ID=CADEHJ010000001.1_tss559;type=Primary;utr_length=Primary_28;associated_gene=OCPFDLNE_01074;libs=all;method=TSSpredator
CADEHJ010000001.1	ANNOgesic	TSS	1077544	1077544	.	+	.	Name=TSS:1077544_f;ID=CADEHJ010000001.1_tss560;type=Internal;utr_length=Internal_NA;associated_gene=OCPFDLNE_01075;libs=all;method=TSSpredator
CADEHJ010000001.1	ANNOgesic	TSS	1078746	1078746	.	-	.	Name=TSS:1078746_r;ID=CADEHJ010000001.1_tss561;type=Primary;utr_length=Primary_29;associated_gene=OCPFDLNE_01076;libs=all;method=TSSpredator
CADEHJ010000001.1	ANNOgesic	TSS	1078970	1078970	.	+	.	Name=TSS:1078970_f;ID=CADEHJ010000001.1_tss562;type=Primary;utr_length=Primary_82;associated_gene=OCPFDLNE_01077;libs=all;method=TSSpredator
CADEHJ010000001.1	ANNOgesic	TSS	1082088	1082088	.	+	.	Name=TSS:1082088_f;ID=CADEHJ010000001.1_tss563;type=Primary;utr_length=Primary_29;associated_gene=OCPFDLNE_01080;libs=all;method=TSSpredator
CADEHJ010000001.1	ANNOgesic	TSS	1082693	1082693	.	+	.	Name=TSS:1082693_f;ID=CADEHJ010000001.1_tss564;type=Primary;utr_length=Primary_28;associated_gene=OCPFDLNE_01081;libs=all;method=TSSpredator
CADEHJ010000001.1	ANNOgesic	TSS	1084435	1084435	.	+	.	Name=TSS:1084435_f;ID=CADEHJ010000001.1_tss565;type=Primary;utr_length=Primary_69;associated_gene=OCPFDLNE_01083;libs=all;method=TSSpredator
CADEHJ010000001.1	ANNOgesic	TSS	1085576	1085576	.	+	.	Name=TSS:1085576_f;ID=CADEHJ010000001.1_tss566;type=Internal;utr_length=Internal_NA;associated_gene=OCPFDLNE_01084;libs=all;method=TSSpredator
CADEHJ010000001.1	ANNOgesic	TSS	1087703	1087703	.	+	.	Name=TSS:1087703_f;ID=CADEHJ010000001.1_tss567;type=Primary;utr_length=Primary_37;associated_gene=OCPFDLNE_01087;libs=all;method=TSSpredator
CADEHJ010000001.1	ANNOgesic	TSS	1090546	1090546	.	-	.	Name=TSS:1090546_r;ID=CADEHJ010000001.1_tss568;type=Primary;utr_length=Primary_31;associated_gene=OCPFDLNE_01089;libs=all;method=TSSpredator
CADEHJ010000001.1	ANNOgesic	TSS	1092734	1092734	.	-	.	Name=TSS:1092734_r;ID=CADEHJ010000001.1_tss569;type=Primary;utr_length=Primary_227;associated_gene=OCPFDLNE_01091;libs=all;method=TSSpredator
CADEHJ010000001.1	ANNOgesic	TSS	1092852	1092852	.	-	.	Name=TSS:1092852_r;ID=CADEHJ010000001.1_tss570;type=Orphan;utr_length=Orphan_NA;associated_gene=orphan;libs=all;method=TSSpredator
CADEHJ010000001.1	ANNOgesic	TSS	1092950	1092950	.	+	.	Name=TSS:1092950_f;ID=CADEHJ010000001.1_tss571;type=Primary;utr_length=Primary_42;associated_gene=OCPFDLNE_01092;libs=all;method=TSSpredator
CADEHJ010000001.1	ANNOgesic	TSS	1094870	1094870	.	-	.	Name=TSS:1094870_r;ID=CADEHJ010000001.1_tss572;type=Primary;utr_length=Primary_31;associated_gene=OCPFDLNE_01093;libs=all;method=TSSpredator
CADEHJ010000001.1	ANNOgesic	TSS	1095033	1095033	.	+	.	Name=TSS:1095033_f;ID=CADEHJ010000001.1_tss573;type=Primary;utr_length=Primary_70;associated_gene=OCPFDLNE_01094;libs=all;method=TSSpredator
CADEHJ010000001.1	ANNOgesic	TSS	1099047	1099047	.	+	.	Name=TSS:1099047_f;ID=CADEHJ010000001.1_tss574;type=Internal;utr_length=Internal_NA;associated_gene=OCPFDLNE_01097;libs=all;method=TSSpredator
CADEHJ010000001.1	ANNOgesic	TSS	1099731	1099731	.	+	.	Name=TSS:1099731_f;ID=CADEHJ010000001.1_tss575;type=Primary,Internal;utr_length=Primary_21,Internal_NA;associated_gene=OCPFDLNE_01098,OCPFDLNE_01097;libs=all;method=TSSpredator
CADEHJ010000001.1	ANNOgesic	TSS	1101059	1101059	.	-	.	Name=TSS:1101059_r;ID=CADEHJ010000001.1_tss576;type=Antisense;utr_length=Antisense_NA;associated_gene=OCPFDLNE_01098;libs=all;method=TSSpredator
CADEHJ010000001.1	ANNOgesic	TSS	1101242	1101242	.	+	.	Name=TSS:1101242_f;ID=CADEHJ010000001.1_tss577;type=Internal;utr_length=Internal_NA;associated_gene=OCPFDLNE_01098;libs=all;method=TSSpredator
CADEHJ010000001.1	ANNOgesic	TSS	1104248	1104248	.	-	.	Name=TSS:1104248_r;ID=CADEHJ010000001.1_tss578;type=Internal;utr_length=Internal_NA;associated_gene=OCPFDLNE_01101;libs=all;method=TSSpredator
CADEHJ010000001.1	ANNOgesic	TSS	1105750	1105750	.	-	.	Name=TSS:1105750_r;ID=CADEHJ010000001.1_tss579;type=Primary,Antisense;utr_length=Primary_27,Antisense_NA;associated_gene=OCPFDLNE_01103,OCPFDLNE_01104;libs=all;method=TSSpredator
CADEHJ010000001.1	ANNOgesic	TSS	1105806	1105806	.	+	.	Name=TSS:1105806_f;ID=CADEHJ010000001.1_tss580;type=Primary,Antisense;utr_length=Primary_22,Antisense_NA;associated_gene=OCPFDLNE_01104,OCPFDLNE_01103;libs=all;method=TSSpredator
CADEHJ010000001.1	ANNOgesic	TSS	1106650	1106650	.	+	.	Name=TSS:1106650_f;ID=CADEHJ010000001.1_tss581;type=Primary;utr_length=Primary_43;associated_gene=OCPFDLNE_01105;libs=all;method=TSSpredator
CADEHJ010000001.1	ANNOgesic	TSS	1112105	1112105	.	-	.	Name=TSS:1112105_r;ID=CADEHJ010000001.1_tss582;type=Primary;utr_length=Primary_16;associated_gene=OCPFDLNE_01112;libs=all;method=TSSpredator
CADEHJ010000001.1	ANNOgesic	TSS	1113405	1113405	.	-	.	Name=TSS:1113405_r;ID=CADEHJ010000001.1_tss583;type=Primary;utr_length=Primary_31;associated_gene=OCPFDLNE_01114;libs=all;method=TSSpredator
CADEHJ010000001.1	ANNOgesic	TSS	1120045	1120045	.	+	.	Name=TSS:1120045_f;ID=CADEHJ010000001.1_tss584;type=Primary;utr_length=Primary_27;associated_gene=OCPFDLNE_01120;libs=all;method=TSSpredator
CADEHJ010000001.1	ANNOgesic	TSS	1127434	1127434	.	-	.	Name=TSS:1127434_r;ID=CADEHJ010000001.1_tss585;type=Primary;utr_length=Primary_161;associated_gene=OCPFDLNE_01127;libs=all;method=TSSpredator
CADEHJ010000001.1	ANNOgesic	TSS	1128113	1128113	.	-	.	Name=TSS:1128113_r;ID=CADEHJ010000001.1_tss586;type=Primary;utr_length=Primary_25;associated_gene=OCPFDLNE_01128;libs=all;method=TSSpredator
CADEHJ010000001.1	ANNOgesic	TSS	1128194	1128194	.	+	.	Name=TSS:1128194_f;ID=CADEHJ010000001.1_tss587;type=Primary;utr_length=Primary_25;associated_gene=OCPFDLNE_01129;libs=all;method=TSSpredator
CADEHJ010000001.1	ANNOgesic	TSS	1129074	1129074	.	+	.	Name=TSS:1129074_f;ID=CADEHJ010000001.1_tss588;type=Primary;utr_length=Primary_110;associated_gene=OCPFDLNE_01130;libs=all;method=TSSpredator
CADEHJ010000001.1	ANNOgesic	TSS	1131121	1131121	.	+	.	Name=TSS:1131121_f;ID=CADEHJ010000001.1_tss589;type=Secondary;utr_length=Secondary_73;associated_gene=OCPFDLNE_01131;libs=all;method=TSSpredator
CADEHJ010000001.1	ANNOgesic	TSS	1131171	1131171	.	+	.	Name=TSS:1131171_f;ID=CADEHJ010000001.1_tss590;type=Primary;utr_length=Primary_23;associated_gene=OCPFDLNE_01131;libs=all;method=TSSpredator
CADEHJ010000001.1	ANNOgesic	TSS	1132350	1132350	.	-	.	Name=TSS:1132350_r;ID=CADEHJ010000001.1_tss591;type=Primary;utr_length=Primary_16;associated_gene=OCPFDLNE_01132;libs=all;method=TSSpredator
CADEHJ010000001.1	ANNOgesic	TSS	1132458	1132458	.	+	.	Name=TSS:1132458_f;ID=CADEHJ010000001.1_tss592;type=Primary;utr_length=Primary_82;associated_gene=OCPFDLNE_01133;libs=all;method=TSSpredator
CADEHJ010000001.1	ANNOgesic	TSS	1132956	1132956	.	+	.	Name=TSS:1132956_f;ID=CADEHJ010000001.1_tss593;type=Primary;utr_length=Primary_48;associated_gene=OCPFDLNE_01134;libs=all;method=TSSpredator
CADEHJ010000001.1	ANNOgesic	TSS	1134366	1134366	.	+	.	Name=TSS:1134366_f;ID=CADEHJ010000001.1_tss594;type=Primary;utr_length=Primary_118;associated_gene=OCPFDLNE_01135;libs=all;method=TSSpredator
CADEHJ010000001.1	ANNOgesic	TSS	1141224	1141224	.	+	.	Name=TSS:1141224_f;ID=CADEHJ010000001.1_tss595;type=Primary;utr_length=Primary_35;associated_gene=OCPFDLNE_01139;libs=all;method=TSSpredator
CADEHJ010000001.1	ANNOgesic	TSS	1143094	1143094	.	+	.	Name=TSS:1143094_f;ID=CADEHJ010000001.1_tss596;type=Primary;utr_length=Primary_98;associated_gene=OCPFDLNE_01140;libs=all;method=TSSpredator
CADEHJ010000001.1	ANNOgesic	TSS	1145818	1145818	.	-	.	Name=TSS:1145818_r;ID=CADEHJ010000001.1_tss597;type=Primary;utr_length=Primary_24;associated_gene=OCPFDLNE_01141;libs=all;method=TSSpredator
CADEHJ010000001.1	ANNOgesic	TSS	1145960	1145960	.	+	.	Name=TSS:1145960_f;ID=CADEHJ010000001.1_tss598;type=Primary;utr_length=Primary_26;associated_gene=OCPFDLNE_01142;libs=all;method=TSSpredator
CADEHJ010000001.1	ANNOgesic	TSS	1148952	1148952	.	+	.	Name=TSS:1148952_f;ID=CADEHJ010000001.1_tss599;type=Primary;utr_length=Primary_24;associated_gene=OCPFDLNE_01143;libs=all;method=TSSpredator
CADEHJ010000001.1	ANNOgesic	TSS	1154209	1154209	.	+	.	Name=TSS:1154209_f;ID=CADEHJ010000001.1_tss600;type=Primary;utr_length=Primary_39;associated_gene=OCPFDLNE_01148;libs=all;method=TSSpredator
CADEHJ010000001.1	ANNOgesic	TSS	1156281	1156281	.	+	.	Name=TSS:1156281_f;ID=CADEHJ010000001.1_tss601;type=Primary;utr_length=Primary_34;associated_gene=OCPFDLNE_01149;libs=all;method=TSSpredator
CADEHJ010000001.1	ANNOgesic	TSS	1161872	1161872	.	+	.	Name=TSS:1161872_f;ID=CADEHJ010000001.1_tss602;type=Primary;utr_length=Primary_49;associated_gene=OCPFDLNE_01155;libs=all;method=TSSpredator
CADEHJ010000001.1	ANNOgesic	TSS	1161956	1161956	.	+	.	Name=TSS:1161956_f;ID=CADEHJ010000001.1_tss603;type=Internal;utr_length=Internal_NA;associated_gene=OCPFDLNE_01155;libs=all;method=TSSpredator
CADEHJ010000001.1	ANNOgesic	TSS	1164576	1164576	.	+	.	Name=TSS:1164576_f;ID=CADEHJ010000001.1_tss604;type=Primary;utr_length=Primary_52;associated_gene=OCPFDLNE_01158;libs=all;method=TSSpredator
CADEHJ010000001.1	ANNOgesic	TSS	1166822	1166822	.	+	.	Name=TSS:1166822_f;ID=CADEHJ010000001.1_tss605;type=Primary;utr_length=Primary_28;associated_gene=OCPFDLNE_01160;libs=all;method=TSSpredator
CADEHJ010000001.1	ANNOgesic	TSS	1168587	1168587	.	-	.	Name=TSS:1168587_r;ID=CADEHJ010000001.1_tss606;type=Internal;utr_length=Internal_NA;associated_gene=OCPFDLNE_01161;libs=all;method=TSSpredator
CADEHJ010000001.1	ANNOgesic	TSS	1170929	1170929	.	+	.	Name=TSS:1170929_f;ID=CADEHJ010000001.1_tss607;type=Primary,Internal;utr_length=Primary_212,Internal_NA;associated_gene=OCPFDLNE_01165,OCPFDLNE_01164;libs=all;method=TSSpredator
CADEHJ010000001.1	ANNOgesic	TSS	1173044	1173044	.	+	.	Name=TSS:1173044_f;ID=CADEHJ010000001.1_tss608;type=Primary;utr_length=Primary_103;associated_gene=OCPFDLNE_01169;libs=all;method=TSSpredator
CADEHJ010000001.1	ANNOgesic	TSS	1180275	1180275	.	+	.	Name=TSS:1180275_f;ID=CADEHJ010000001.1_tss609;type=Internal;utr_length=Internal_NA;associated_gene=OCPFDLNE_01176;libs=all;method=TSSpredator
CADEHJ010000001.1	ANNOgesic	TSS	1180916	1180916	.	+	.	Name=TSS:1180916_f;ID=CADEHJ010000001.1_tss610;type=Primary,Antisense;utr_length=Primary_32,Antisense_NA;associated_gene=OCPFDLNE_01178,OCPFDLNE_01177;libs=all;method=TSSpredator
CADEHJ010000001.1	ANNOgesic	TSS	1182910	1182910	.	+	.	Name=TSS:1182910_f;ID=CADEHJ010000001.1_tss611;type=Primary;utr_length=Primary_19;associated_gene=OCPFDLNE_01180;libs=all;method=TSSpredator
CADEHJ010000001.1	ANNOgesic	TSS	1185606	1185606	.	-	.	Name=TSS:1185606_r;ID=CADEHJ010000001.1_tss612;type=Primary;utr_length=Primary_40;associated_gene=OCPFDLNE_01182;libs=all;method=TSSpredator
CADEHJ010000001.1	ANNOgesic	TSS	1186491	1186491	.	-	.	Name=TSS:1186491_r;ID=CADEHJ010000001.1_tss613;type=Primary,Antisense;utr_length=Primary_22,Antisense_NA;associated_gene=OCPFDLNE_01184,OCPFDLNE_01185;libs=all;method=TSSpredator
CADEHJ010000001.1	ANNOgesic	TSS	1186536	1186536	.	+	.	Name=TSS:1186536_f;ID=CADEHJ010000001.1_tss614;type=Primary,Antisense;utr_length=Primary_25,Antisense_NA;associated_gene=OCPFDLNE_01185,OCPFDLNE_01184;libs=all;method=TSSpredator
CADEHJ010000001.1	ANNOgesic	TSS	1187134	1187134	.	+	.	Name=TSS:1187134_f;ID=CADEHJ010000001.1_tss615;type=Primary;utr_length=Primary_34;associated_gene=OCPFDLNE_01186;libs=all;method=TSSpredator
CADEHJ010000001.1	ANNOgesic	TSS	1189190	1189190	.	+	.	Name=TSS:1189190_f;ID=CADEHJ010000001.1_tss616;type=Primary;utr_length=Primary_32;associated_gene=OCPFDLNE_01188;libs=all;method=TSSpredator
CADEHJ010000001.1	ANNOgesic	TSS	1192725	1192725	.	+	.	Name=TSS:1192725_f;ID=CADEHJ010000001.1_tss617;type=Orphan;utr_length=Orphan_NA;associated_gene=orphan;libs=all;method=TSSpredator
CADEHJ010000001.1	ANNOgesic	TSS	1193992	1193992	.	-	.	Name=TSS:1193992_r;ID=CADEHJ010000001.1_tss618;type=Primary;utr_length=Primary_39;associated_gene=OCPFDLNE_01194;libs=all;method=TSSpredator
CADEHJ010000001.1	ANNOgesic	TSS	1194222	1194222	.	+	.	Name=TSS:1194222_f;ID=CADEHJ010000001.1_tss619;type=Primary;utr_length=Primary_33;associated_gene=OCPFDLNE_01195;libs=all;method=TSSpredator
CADEHJ010000001.1	ANNOgesic	TSS	1211011	1211011	.	+	.	Name=TSS:1211011_f;ID=CADEHJ010000001.1_tss620;type=Orphan;utr_length=Orphan_NA;associated_gene=orphan;libs=all;method=TSSpredator
CADEHJ010000001.1	ANNOgesic	TSS	1212765	1212765	.	+	.	Name=TSS:1212765_f;ID=CADEHJ010000001.1_tss621;type=Primary;utr_length=Primary_212;associated_gene=OCPFDLNE_01216;libs=all;method=TSSpredator
CADEHJ010000001.1	ANNOgesic	TSS	1226464	1226464	.	+	.	Name=TSS:1226464_f;ID=CADEHJ010000001.1_tss622;type=Primary;utr_length=Primary_89;associated_gene=OCPFDLNE_01232;libs=all;method=TSSpredator
CADEHJ010000001.1	ANNOgesic	TSS	1228621	1228621	.	-	.	Name=TSS:1228621_r;ID=CADEHJ010000001.1_tss623;type=Primary;utr_length=Primary_26;associated_gene=OCPFDLNE_01233;libs=all;method=TSSpredator
CADEHJ010000001.1	ANNOgesic	TSS	1228874	1228874	.	+	.	Name=TSS:1228874_f;ID=CADEHJ010000001.1_tss624;type=Primary;utr_length=Primary_35;associated_gene=OCPFDLNE_01234;libs=all;method=TSSpredator
CADEHJ010000001.1	ANNOgesic	TSS	1244081	1244081	.	+	.	Name=TSS:1244081_f;ID=CADEHJ010000001.1_tss625;type=Internal;utr_length=Internal_NA;associated_gene=OCPFDLNE_01252;libs=all;method=TSSpredator
CADEHJ010000001.1	ANNOgesic	TSS	1246756	1246756	.	-	.	Name=TSS:1246756_r;ID=CADEHJ010000001.1_tss626;type=Primary,Antisense;utr_length=Primary_25,Antisense_NA;associated_gene=OCPFDLNE_01255,OCPFDLNE_01256;libs=all;method=TSSpredator
CADEHJ010000001.1	ANNOgesic	TSS	1247353	1247353	.	+	.	Name=TSS:1247353_f;ID=CADEHJ010000001.1_tss627;type=Primary;utr_length=Primary_28;associated_gene=OCPFDLNE_01257;libs=all;method=TSSpredator
CADEHJ010000001.1	ANNOgesic	TSS	1248550	1248550	.	+	.	Name=TSS:1248550_f;ID=CADEHJ010000001.1_tss628;type=Primary;utr_length=Primary_159;associated_gene=OCPFDLNE_01259;libs=all;method=TSSpredator
CADEHJ010000001.1	ANNOgesic	TSS	1250824	1250824	.	+	.	Name=TSS:1250824_f;ID=CADEHJ010000001.1_tss629;type=Primary;utr_length=Primary_25;associated_gene=OCPFDLNE_01261;libs=all;method=TSSpredator
CADEHJ010000001.1	ANNOgesic	TSS	1253145	1253145	.	-	.	Name=TSS:1253145_r;ID=CADEHJ010000001.1_tss630;type=Primary;utr_length=Primary_29;associated_gene=OCPFDLNE_01263;libs=all;method=TSSpredator
CADEHJ010000001.1	ANNOgesic	TSS	1253260	1253260	.	+	.	Name=TSS:1253260_f;ID=CADEHJ010000001.1_tss631;type=Primary;utr_length=Primary_13;associated_gene=OCPFDLNE_01264;libs=all;method=TSSpredator
CADEHJ010000001.1	ANNOgesic	TSS	1253679	1253679	.	+	.	Name=TSS:1253679_f;ID=CADEHJ010000001.1_tss632;type=Primary;utr_length=Primary_284;associated_gene=OCPFDLNE_01265;libs=all;method=TSSpredator
CADEHJ010000001.1	ANNOgesic	TSS	1257556	1257556	.	+	.	Name=TSS:1257556_f;ID=CADEHJ010000001.1_tss633;type=Primary;utr_length=Primary_28;associated_gene=OCPFDLNE_01267;libs=all;method=TSSpredator
CADEHJ010000001.1	ANNOgesic	TSS	1261786	1261786	.	+	.	Name=TSS:1261786_f;ID=CADEHJ010000001.1_tss634;type=Primary;utr_length=Primary_21;associated_gene=OCPFDLNE_01269;libs=all;method=TSSpredator
CADEHJ010000001.1	ANNOgesic	TSS	1262131	1262131	.	+	.	Name=TSS:1262131_f;ID=CADEHJ010000001.1_tss635;type=Primary,Internal;utr_length=Primary_144,Internal_NA;associated_gene=OCPFDLNE_01270,OCPFDLNE_01269;libs=all;method=TSSpredator
CADEHJ010000001.1	ANNOgesic	TSS	1265554	1265554	.	+	.	Name=TSS:1265554_f;ID=CADEHJ010000001.1_tss636;type=Primary;utr_length=Primary_28;associated_gene=OCPFDLNE_01271;libs=all;method=TSSpredator
CADEHJ010000001.1	ANNOgesic	TSS	1267334	1267334	.	+	.	Name=TSS:1267334_f;ID=CADEHJ010000001.1_tss637;type=Primary;utr_length=Primary_40;associated_gene=OCPFDLNE_01273;libs=all;method=TSSpredator
CADEHJ010000001.1	ANNOgesic	TSS	1269723	1269723	.	+	.	Name=TSS:1269723_f;ID=CADEHJ010000001.1_tss638;type=Primary,Internal;utr_length=Primary_284,Internal_NA;associated_gene=OCPFDLNE_01276,OCPFDLNE_01275;libs=all;method=TSSpredator
CADEHJ010000001.1	ANNOgesic	TSS	1272417	1272417	.	+	.	Name=TSS:1272417_f;ID=CADEHJ010000001.1_tss639;type=Primary;utr_length=Primary_28;associated_gene=OCPFDLNE_01277;libs=all;method=TSSpredator
CADEHJ010000001.1	ANNOgesic	TSS	1273024	1273024	.	-	.	Name=TSS:1273024_r;ID=CADEHJ010000001.1_tss640;type=Antisense;utr_length=Antisense_NA;associated_gene=OCPFDLNE_01278;libs=all;method=TSSpredator
CADEHJ010000001.1	ANNOgesic	TSS	1274794	1274794	.	+	.	Name=TSS:1274794_f;ID=CADEHJ010000001.1_tss641;type=Primary;utr_length=Primary_38;associated_gene=OCPFDLNE_01279;libs=all;method=TSSpredator
CADEHJ010000001.1	ANNOgesic	TSS	1276578	1276578	.	-	.	Name=TSS:1276578_r;ID=CADEHJ010000001.1_tss642;type=Internal;utr_length=Internal_NA;associated_gene=OCPFDLNE_01280;libs=all;method=TSSpredator
CADEHJ010000001.1	ANNOgesic	TSS	1276590	1276590	.	-	.	Name=TSS:1276590_r;ID=CADEHJ010000001.1_tss643;type=Primary;utr_length=Primary_3;associated_gene=OCPFDLNE_01280;libs=all;method=TSSpredator
CADEHJ010000001.1	ANNOgesic	TSS	1276699	1276699	.	+	.	Name=TSS:1276699_f;ID=CADEHJ010000001.1_tss644;type=Primary;utr_length=Primary_45;associated_gene=OCPFDLNE_01281;libs=all;method=TSSpredator
CADEHJ010000001.1	ANNOgesic	TSS	1278930	1278930	.	+	.	Name=TSS:1278930_f;ID=CADEHJ010000001.1_tss645;type=Primary;utr_length=Primary_25;associated_gene=OCPFDLNE_01284;libs=all;method=TSSpredator
CADEHJ010000001.1	ANNOgesic	TSS	1279995	1279995	.	+	.	Name=TSS:1279995_f;ID=CADEHJ010000001.1_tss646;type=Primary;utr_length=Primary_35;associated_gene=OCPFDLNE_01286;libs=all;method=TSSpredator
CADEHJ010000001.1	ANNOgesic	TSS	1282072	1282072	.	-	.	Name=TSS:1282072_r;ID=CADEHJ010000001.1_tss647;type=Primary;utr_length=Primary_50;associated_gene=OCPFDLNE_01287;libs=all;method=TSSpredator
CADEHJ010000001.1	ANNOgesic	TSS	1282631	1282631	.	-	.	Name=TSS:1282631_r;ID=CADEHJ010000001.1_tss648;type=Primary;utr_length=Primary_48;associated_gene=OCPFDLNE_01288;libs=all;method=TSSpredator
CADEHJ010000001.1	ANNOgesic	TSS	1282723	1282723	.	+	.	Name=TSS:1282723_f;ID=CADEHJ010000001.1_tss649;type=Primary;utr_length=Primary_25;associated_gene=OCPFDLNE_01289;libs=all;method=TSSpredator
CADEHJ010000001.1	ANNOgesic	TSS	1283664	1283664	.	-	.	Name=TSS:1283664_r;ID=CADEHJ010000001.1_tss650;type=Primary,Antisense;utr_length=Primary_25,Antisense_NA;associated_gene=OCPFDLNE_01290,OCPFDLNE_01291;libs=all;method=TSSpredator
CADEHJ010000001.1	ANNOgesic	TSS	1283746	1283746	.	+	.	Name=TSS:1283746_f;ID=CADEHJ010000001.1_tss651;type=Primary;utr_length=Primary_17;associated_gene=OCPFDLNE_01291;libs=all;method=TSSpredator
CADEHJ010000001.1	ANNOgesic	TSS	1285506	1285506	.	+	.	Name=TSS:1285506_f;ID=CADEHJ010000001.1_tss652;type=Primary;utr_length=Primary_125;associated_gene=OCPFDLNE_01293;libs=all;method=TSSpredator
CADEHJ010000001.1	ANNOgesic	TSS	1287639	1287639	.	-	.	Name=TSS:1287639_r;ID=CADEHJ010000001.1_tss653;type=Primary;utr_length=Primary_47;associated_gene=OCPFDLNE_01295;libs=all;method=TSSpredator
CADEHJ010000001.1	ANNOgesic	TSS	1287749	1287749	.	+	.	Name=TSS:1287749_f;ID=CADEHJ010000001.1_tss654;type=Secondary;utr_length=Secondary_48;associated_gene=OCPFDLNE_01296;libs=all;method=TSSpredator
CADEHJ010000001.1	ANNOgesic	TSS	1287762	1287762	.	+	.	Name=TSS:1287762_f;ID=CADEHJ010000001.1_tss655;type=Primary;utr_length=Primary_35;associated_gene=OCPFDLNE_01296;libs=all;method=TSSpredator
CADEHJ010000001.1	ANNOgesic	TSS	1288724	1288724	.	-	.	Name=TSS:1288724_r;ID=CADEHJ010000001.1_tss656;type=Primary;utr_length=Primary_32;associated_gene=OCPFDLNE_01297;libs=all;method=TSSpredator
CADEHJ010000001.1	ANNOgesic	TSS	1290121	1290121	.	-	.	Name=TSS:1290121_r;ID=CADEHJ010000001.1_tss657;type=Primary;utr_length=Primary_45;associated_gene=OCPFDLNE_01299;libs=all;method=TSSpredator
CADEHJ010000001.1	ANNOgesic	TSS	1290215	1290215	.	+	.	Name=TSS:1290215_f;ID=CADEHJ010000001.1_tss658;type=Primary;utr_length=Primary_12;associated_gene=OCPFDLNE_01300;libs=all;method=TSSpredator
CADEHJ010000001.1	ANNOgesic	TSS	1290761	1290761	.	+	.	Name=TSS:1290761_f;ID=CADEHJ010000001.1_tss659;type=Internal;utr_length=Internal_NA;associated_gene=OCPFDLNE_01300;libs=all;method=TSSpredator
CADEHJ010000001.1	ANNOgesic	TSS	1292743	1292743	.	+	.	Name=TSS:1292743_f;ID=CADEHJ010000001.1_tss660;type=Antisense;utr_length=Antisense_NA;associated_gene=OCPFDLNE_01302;libs=all;method=TSSpredator
CADEHJ010000001.1	ANNOgesic	TSS	1294160	1294160	.	-	.	Name=TSS:1294160_r;ID=CADEHJ010000001.1_tss661;type=Primary,Antisense;utr_length=Primary_39,Antisense_NA;associated_gene=OCPFDLNE_01302,OCPFDLNE_01303;libs=all;method=TSSpredator
CADEHJ010000001.1	ANNOgesic	TSS	1295219	1295219	.	-	.	Name=TSS:1295219_r;ID=CADEHJ010000001.1_tss662;type=Primary;utr_length=Primary_17;associated_gene=OCPFDLNE_01304;libs=all;method=TSSpredator
CADEHJ010000001.1	ANNOgesic	TSS	1295368	1295368	.	+	.	Name=TSS:1295368_f;ID=CADEHJ010000001.1_tss663;type=Primary;utr_length=Primary_23;associated_gene=OCPFDLNE_01305;libs=all;method=TSSpredator
CADEHJ010000001.1	ANNOgesic	TSS	1298421	1298421	.	-	.	Name=TSS:1298421_r;ID=CADEHJ010000001.1_tss664;type=Primary;utr_length=Primary_30;associated_gene=OCPFDLNE_01307;libs=all;method=TSSpredator
CADEHJ010000001.1	ANNOgesic	TSS	1299712	1299712	.	-	.	Name=TSS:1299712_r;ID=CADEHJ010000001.1_tss665;type=Primary;utr_length=Primary_34;associated_gene=OCPFDLNE_01308;libs=all;method=TSSpredator
CADEHJ010000001.1	ANNOgesic	TSS	1302078	1302078	.	+	.	Name=TSS:1302078_f;ID=CADEHJ010000001.1_tss666;type=Primary;utr_length=Primary_39;associated_gene=OCPFDLNE_01313;libs=all;method=TSSpredator
CADEHJ010000001.1	ANNOgesic	TSS	1303104	1303104	.	+	.	Name=TSS:1303104_f;ID=CADEHJ010000001.1_tss667;type=Primary;utr_length=Primary_66;associated_gene=OCPFDLNE_01314;libs=all;method=TSSpredator
CADEHJ010000001.1	ANNOgesic	TSS	1304579	1304579	.	+	.	Name=TSS:1304579_f;ID=CADEHJ010000001.1_tss668;type=Primary;utr_length=Primary_59;associated_gene=OCPFDLNE_01315;libs=all;method=TSSpredator
CADEHJ010000001.1	ANNOgesic	TSS	1305990	1305990	.	+	.	Name=TSS:1305990_f;ID=CADEHJ010000001.1_tss669;type=Primary;utr_length=Primary_26;associated_gene=OCPFDLNE_01316;libs=all;method=TSSpredator
CADEHJ010000001.1	ANNOgesic	TSS	1306513	1306513	.	-	.	Name=TSS:1306513_r;ID=CADEHJ010000001.1_tss670;type=Antisense;utr_length=Antisense_NA;associated_gene=OCPFDLNE_01316;libs=all;method=TSSpredator
CADEHJ010000001.1	ANNOgesic	TSS	1307259	1307259	.	+	.	Name=TSS:1307259_f;ID=CADEHJ010000001.1_tss671;type=Primary;utr_length=Primary_29;associated_gene=OCPFDLNE_01318;libs=all;method=TSSpredator
CADEHJ010000001.1	ANNOgesic	TSS	1307555	1307555	.	+	.	Name=TSS:1307555_f;ID=CADEHJ010000001.1_tss672;type=Primary,Internal;utr_length=Primary_285,Internal_NA;associated_gene=OCPFDLNE_01319,OCPFDLNE_01318;libs=all;method=TSSpredator
CADEHJ010000001.1	ANNOgesic	TSS	1309597	1309597	.	+	.	Name=TSS:1309597_f;ID=CADEHJ010000001.1_tss673;type=Primary;utr_length=Primary_22;associated_gene=OCPFDLNE_01321;libs=all;method=TSSpredator
CADEHJ010000001.1	ANNOgesic	TSS	1310549	1310549	.	+	.	Name=TSS:1310549_f;ID=CADEHJ010000001.1_tss674;type=Secondary;utr_length=Secondary_202;associated_gene=OCPFDLNE_01322;libs=all;method=TSSpredator
CADEHJ010000001.1	ANNOgesic	TSS	1310634	1310634	.	+	.	Name=TSS:1310634_f;ID=CADEHJ010000001.1_tss675;type=Primary;utr_length=Primary_117;associated_gene=OCPFDLNE_01322;libs=all;method=TSSpredator
CADEHJ010000001.1	ANNOgesic	TSS	1314215	1314215	.	+	.	Name=TSS:1314215_f;ID=CADEHJ010000001.1_tss676;type=Secondary;utr_length=Secondary_264;associated_gene=OCPFDLNE_01324;libs=all;method=TSSpredator
CADEHJ010000001.1	ANNOgesic	TSS	1314460	1314460	.	+	.	Name=TSS:1314460_f;ID=CADEHJ010000001.1_tss677;type=Primary;utr_length=Primary_19;associated_gene=OCPFDLNE_01324;libs=all;method=TSSpredator
CADEHJ010000001.1	ANNOgesic	TSS	1318237	1318237	.	+	.	Name=TSS:1318237_f;ID=CADEHJ010000001.1_tss678;type=Primary;utr_length=Primary_30;associated_gene=OCPFDLNE_01328;libs=all;method=TSSpredator
CADEHJ010000001.1	ANNOgesic	TSS	1320565	1320565	.	-	.	Name=TSS:1320565_r;ID=CADEHJ010000001.1_tss679;type=Primary;utr_length=Primary_33;associated_gene=OCPFDLNE_01331;libs=all;method=TSSpredator
CADEHJ010000001.1	ANNOgesic	TSS	1320666	1320666	.	+	.	Name=TSS:1320666_f;ID=CADEHJ010000001.1_tss680;type=Primary;utr_length=Primary_24;associated_gene=OCPFDLNE_01332;libs=all;method=TSSpredator
CADEHJ010000001.1	ANNOgesic	TSS	1321215	1321215	.	+	.	Name=TSS:1321215_f;ID=CADEHJ010000001.1_tss681;type=Primary;utr_length=Primary_63;associated_gene=OCPFDLNE_01333;libs=all;method=TSSpredator
CADEHJ010000001.1	ANNOgesic	TSS	1325764	1325764	.	+	.	Name=TSS:1325764_f;ID=CADEHJ010000001.1_tss682;type=Primary;utr_length=Primary_20;associated_gene=OCPFDLNE_01335;libs=all;method=TSSpredator
CADEHJ010000001.1	ANNOgesic	TSS	1326505	1326505	.	+	.	Name=TSS:1326505_f;ID=CADEHJ010000001.1_tss683;type=Primary;utr_length=Primary_73;associated_gene=OCPFDLNE_01336;libs=all;method=TSSpredator
CADEHJ010000001.1	ANNOgesic	TSS	1327577	1327577	.	+	.	Name=TSS:1327577_f;ID=CADEHJ010000001.1_tss684;type=Internal;utr_length=Internal_NA;associated_gene=OCPFDLNE_01336;libs=all;method=TSSpredator
CADEHJ010000001.1	ANNOgesic	TSS	1331403	1331403	.	+	.	Name=TSS:1331403_f;ID=CADEHJ010000001.1_tss685;type=Antisense;utr_length=Antisense_NA;associated_gene=OCPFDLNE_01338;libs=all;method=TSSpredator
CADEHJ010000001.1	ANNOgesic	TSS	1332421	1332421	.	-	.	Name=TSS:1332421_r;ID=CADEHJ010000001.1_tss686;type=Primary;utr_length=Primary_80;associated_gene=OCPFDLNE_01338;libs=all;method=TSSpredator
CADEHJ010000001.1	ANNOgesic	TSS	1332528	1332528	.	+	.	Name=TSS:1332528_f;ID=CADEHJ010000001.1_tss687;type=Primary;utr_length=Primary_26;associated_gene=OCPFDLNE_01339;libs=all;method=TSSpredator
CADEHJ010000001.1	ANNOgesic	TSS	1333306	1333306	.	+	.	Name=TSS:1333306_f;ID=CADEHJ010000001.1_tss688;type=Primary;utr_length=Primary_179;associated_gene=OCPFDLNE_01340;libs=all;method=TSSpredator
CADEHJ010000001.1	ANNOgesic	TSS	1333440	1333440	.	+	.	Name=TSS:1333440_f;ID=CADEHJ010000001.1_tss689;type=Secondary;utr_length=Secondary_45;associated_gene=OCPFDLNE_01340;libs=all;method=TSSpredator
CADEHJ010000001.1	ANNOgesic	TSS	1335266	1335266	.	+	.	Name=TSS:1335266_f;ID=CADEHJ010000001.1_tss690;type=Primary;utr_length=Primary_21;associated_gene=OCPFDLNE_01341;libs=all;method=TSSpredator
CADEHJ010000001.1	ANNOgesic	TSS	1336248	1336248	.	+	.	Name=TSS:1336248_f;ID=CADEHJ010000001.1_tss691;type=Primary;utr_length=Primary_79;associated_gene=OCPFDLNE_01342;libs=all;method=TSSpredator
CADEHJ010000001.1	ANNOgesic	TSS	1336648	1336648	.	+	.	Name=TSS:1336648_f;ID=CADEHJ010000001.1_tss692;type=Primary;utr_length=Primary_23;associated_gene=OCPFDLNE_01343;libs=all;method=TSSpredator
CADEHJ010000001.1	ANNOgesic	TSS	1339278	1339278	.	+	.	Name=TSS:1339278_f;ID=CADEHJ010000001.1_tss693;type=Primary;utr_length=Primary_39;associated_gene=OCPFDLNE_01345;libs=all;method=TSSpredator
CADEHJ010000001.1	ANNOgesic	TSS	1341193	1341193	.	+	.	Name=TSS:1341193_f;ID=CADEHJ010000001.1_tss694;type=Primary;utr_length=Primary_41;associated_gene=OCPFDLNE_01347;libs=all;method=TSSpredator
CADEHJ010000001.1	ANNOgesic	TSS	1343771	1343771	.	-	.	Name=TSS:1343771_r;ID=CADEHJ010000001.1_tss695;type=Primary;utr_length=Primary_33;associated_gene=OCPFDLNE_01349;libs=all;method=TSSpredator
CADEHJ010000001.1	ANNOgesic	TSS	1343859	1343859	.	+	.	Name=TSS:1343859_f;ID=CADEHJ010000001.1_tss696;type=Primary;utr_length=Primary_36;associated_gene=OCPFDLNE_01350;libs=all;method=TSSpredator
CADEHJ010000001.1	ANNOgesic	TSS	1344657	1344657	.	+	.	Name=TSS:1344657_f;ID=CADEHJ010000001.1_tss697;type=Primary;utr_length=Primary_33;associated_gene=OCPFDLNE_01352;libs=all;method=TSSpredator
CADEHJ010000001.1	ANNOgesic	TSS	1346782	1346782	.	+	.	Name=TSS:1346782_f;ID=CADEHJ010000001.1_tss698;type=Secondary;utr_length=Secondary_123;associated_gene=OCPFDLNE_01353;libs=all;method=TSSpredator
CADEHJ010000001.1	ANNOgesic	TSS	1346874	1346874	.	+	.	Name=TSS:1346874_f;ID=CADEHJ010000001.1_tss699;type=Primary;utr_length=Primary_31;associated_gene=OCPFDLNE_01353;libs=all;method=TSSpredator
CADEHJ010000001.1	ANNOgesic	TSS	1349121	1349121	.	-	.	Name=TSS:1349121_r;ID=CADEHJ010000001.1_tss700;type=Internal;utr_length=Internal_NA;associated_gene=OCPFDLNE_01356;libs=all;method=TSSpredator
CADEHJ010000001.1	ANNOgesic	TSS	1352231	1352231	.	-	.	Name=TSS:1352231_r;ID=CADEHJ010000001.1_tss701;type=Primary;utr_length=Primary_55;associated_gene=OCPFDLNE_01359;libs=all;method=TSSpredator
CADEHJ010000001.1	ANNOgesic	TSS	1352416	1352416	.	+	.	Name=TSS:1352416_f;ID=CADEHJ010000001.1_tss702;type=Primary;utr_length=Primary_53;associated_gene=OCPFDLNE_01360;libs=all;method=TSSpredator
CADEHJ010000001.1	ANNOgesic	TSS	1353945	1353945	.	+	.	Name=TSS:1353945_f;ID=CADEHJ010000001.1_tss703;type=Primary;utr_length=Primary_39;associated_gene=OCPFDLNE_01362;libs=all;method=TSSpredator
CADEHJ010000001.1	ANNOgesic	TSS	1354334	1354334	.	+	.	Name=TSS:1354334_f;ID=CADEHJ010000001.1_tss704;type=Internal;utr_length=Internal_NA;associated_gene=OCPFDLNE_01362;libs=all;method=TSSpredator
CADEHJ010000001.1	ANNOgesic	TSS	1356506	1356506	.	+	.	Name=TSS:1356506_f;ID=CADEHJ010000001.1_tss705;type=Primary,Internal;utr_length=Primary_209,Internal_NA;associated_gene=OCPFDLNE_01365,OCPFDLNE_01364;libs=all;method=TSSpredator
CADEHJ010000001.1	ANNOgesic	TSS	1361529	1361529	.	+	.	Name=TSS:1361529_f;ID=CADEHJ010000001.1_tss706;type=Internal;utr_length=Internal_NA;associated_gene=OCPFDLNE_01367;libs=all;method=TSSpredator
CADEHJ010000001.1	ANNOgesic	TSS	1364211	1364211	.	+	.	Name=TSS:1364211_f;ID=CADEHJ010000001.1_tss707;type=Primary;utr_length=Primary_133;associated_gene=OCPFDLNE_01368;libs=all;method=TSSpredator
CADEHJ010000001.1	ANNOgesic	TSS	1371623	1371623	.	+	.	Name=TSS:1371623_f;ID=CADEHJ010000001.1_tss708;type=Primary;utr_length=Primary_86;associated_gene=OCPFDLNE_01377;libs=all;method=TSSpredator
CADEHJ010000001.1	ANNOgesic	TSS	1375584	1375584	.	-	.	Name=TSS:1375584_r;ID=CADEHJ010000001.1_tss709;type=Primary;utr_length=Primary_106;associated_gene=OCPFDLNE_01379;libs=all;method=TSSpredator
CADEHJ010000001.1	ANNOgesic	TSS	1376535	1376535	.	-	.	Name=TSS:1376535_r;ID=CADEHJ010000001.1_tss710;type=Primary;utr_length=Primary_33;associated_gene=OCPFDLNE_01381;libs=all;method=TSSpredator
CADEHJ010000001.1	ANNOgesic	TSS	1376656	1376656	.	+	.	Name=TSS:1376656_f;ID=CADEHJ010000001.1_tss711;type=Primary;utr_length=Primary_44;associated_gene=OCPFDLNE_01382;libs=all;method=TSSpredator
CADEHJ010000001.1	ANNOgesic	TSS	1377515	1377515	.	+	.	Name=TSS:1377515_f;ID=CADEHJ010000001.1_tss712;type=Primary;utr_length=Primary_28;associated_gene=OCPFDLNE_01384;libs=all;method=TSSpredator
CADEHJ010000001.1	ANNOgesic	TSS	1380411	1380411	.	+	.	Name=TSS:1380411_f;ID=CADEHJ010000001.1_tss713;type=Primary;utr_length=Primary_22;associated_gene=OCPFDLNE_01387;libs=all;method=TSSpredator
CADEHJ010000001.1	ANNOgesic	TSS	1385685	1385685	.	+	.	Name=TSS:1385685_f;ID=CADEHJ010000001.1_tss714;type=Primary;utr_length=Primary_204;associated_gene=OCPFDLNE_01395;libs=all;method=TSSpredator
CADEHJ010000001.1	ANNOgesic	TSS	1390269	1390269	.	-	.	Name=TSS:1390269_r;ID=CADEHJ010000001.1_tss715;type=Primary;utr_length=Primary_47;associated_gene=OCPFDLNE_01398;libs=all;method=TSSpredator
CADEHJ010000001.1	ANNOgesic	TSS	1391562	1391562	.	-	.	Name=TSS:1391562_r;ID=CADEHJ010000001.1_tss716;type=Primary;utr_length=Primary_28;associated_gene=OCPFDLNE_01400;libs=all;method=TSSpredator
CADEHJ010000001.1	ANNOgesic	TSS	1393539	1393539	.	+	.	Name=TSS:1393539_f;ID=CADEHJ010000001.1_tss717;type=Primary;utr_length=Primary_55;associated_gene=OCPFDLNE_01403;libs=all;method=TSSpredator
CADEHJ010000001.1	ANNOgesic	TSS	1398468	1398468	.	+	.	Name=TSS:1398468_f;ID=CADEHJ010000001.1_tss718;type=Primary,Internal;utr_length=Primary_110,Internal_NA;associated_gene=OCPFDLNE_01409,OCPFDLNE_01408;libs=all;method=TSSpredator
CADEHJ010000001.1	ANNOgesic	TSS	1399778	1399778	.	+	.	Name=TSS:1399778_f;ID=CADEHJ010000001.1_tss719;type=Primary;utr_length=Primary_110;associated_gene=OCPFDLNE_01411;libs=all;method=TSSpredator
CADEHJ010000001.1	ANNOgesic	TSS	1400201	1400201	.	+	.	Name=TSS:1400201_f;ID=CADEHJ010000001.1_tss720;type=Primary;utr_length=Primary_102;associated_gene=OCPFDLNE_01412;libs=all;method=TSSpredator
CADEHJ010000001.1	ANNOgesic	TSS	1403069	1403069	.	+	.	Name=TSS:1403069_f;ID=CADEHJ010000001.1_tss721;type=Primary;utr_length=Primary_27;associated_gene=OCPFDLNE_01414;libs=all;method=TSSpredator
CADEHJ010000001.1	ANNOgesic	TSS	1405310	1405310	.	+	.	Name=TSS:1405310_f;ID=CADEHJ010000001.1_tss722;type=Primary;utr_length=Primary_78;associated_gene=OCPFDLNE_01416;libs=all;method=TSSpredator
CADEHJ010000001.1	ANNOgesic	TSS	1412072	1412072	.	+	.	Name=TSS:1412072_f;ID=CADEHJ010000001.1_tss723;type=Internal;utr_length=Internal_NA;associated_gene=OCPFDLNE_01421;libs=all;method=TSSpredator
CADEHJ010000001.1	ANNOgesic	TSS	1412239	1412239	.	+	.	Name=TSS:1412239_f;ID=CADEHJ010000001.1_tss724;type=Orphan;utr_length=Orphan_NA;associated_gene=orphan;libs=all;method=TSSpredator
CADEHJ010000001.1	ANNOgesic	TSS	1412489	1412489	.	-	.	Name=TSS:1412489_r;ID=CADEHJ010000001.1_tss725;type=Primary,Antisense;utr_length=Primary_36,Antisense_NA;associated_gene=OCPFDLNE_01422,OCPFDLNE_01423;libs=all;method=TSSpredator
CADEHJ010000001.1	ANNOgesic	TSS	1413738	1413738	.	+	.	Name=TSS:1413738_f;ID=CADEHJ010000001.1_tss726;type=Primary;utr_length=Primary_76;associated_gene=OCPFDLNE_01424;libs=all;method=TSSpredator
CADEHJ010000001.1	ANNOgesic	TSS	1415383	1415383	.	+	.	Name=TSS:1415383_f;ID=CADEHJ010000001.1_tss727;type=Primary;utr_length=Primary_40;associated_gene=OCPFDLNE_01425;libs=all;method=TSSpredator
CADEHJ010000001.1	ANNOgesic	TSS	1418765	1418765	.	-	.	Name=TSS:1418765_r;ID=CADEHJ010000001.1_tss728;type=Primary;utr_length=Primary_33;associated_gene=OCPFDLNE_01428;libs=all;method=TSSpredator
CADEHJ010000001.1	ANNOgesic	TSS	1419128	1419128	.	-	.	Name=TSS:1419128_r;ID=CADEHJ010000001.1_tss729;type=Primary;utr_length=Primary_29;associated_gene=OCPFDLNE_01429;libs=all;method=TSSpredator
CADEHJ010000001.1	ANNOgesic	TSS	1419211	1419211	.	+	.	Name=TSS:1419211_f;ID=CADEHJ010000001.1_tss730;type=Primary;utr_length=Primary_28;associated_gene=OCPFDLNE_01430;libs=all;method=TSSpredator
CADEHJ010000001.1	ANNOgesic	TSS	1421751	1421751	.	-	.	Name=TSS:1421751_r;ID=CADEHJ010000001.1_tss731;type=Primary;utr_length=Primary_24;associated_gene=OCPFDLNE_01432;libs=all;method=TSSpredator
CADEHJ010000001.1	ANNOgesic	TSS	1421863	1421863	.	+	.	Name=TSS:1421863_f;ID=CADEHJ010000001.1_tss732;type=Primary;utr_length=Primary_80;associated_gene=OCPFDLNE_01433;libs=all;method=TSSpredator
CADEHJ010000001.1	ANNOgesic	TSS	1422949	1422949	.	+	.	Name=TSS:1422949_f;ID=CADEHJ010000001.1_tss733;type=Primary;utr_length=Primary_72;associated_gene=OCPFDLNE_01434;libs=all;method=TSSpredator
CADEHJ010000001.1	ANNOgesic	TSS	1425257	1425257	.	+	.	Name=TSS:1425257_f;ID=CADEHJ010000001.1_tss734;type=Internal,Antisense;utr_length=Internal_NA,Antisense_NA;associated_gene=OCPFDLNE_01434,OCPFDLNE_01435;libs=all;method=TSSpredator
CADEHJ010000001.1	ANNOgesic	TSS	1426189	1426189	.	-	.	Name=TSS:1426189_r;ID=CADEHJ010000001.1_tss735;type=Primary;utr_length=Primary_22;associated_gene=OCPFDLNE_01435;libs=all;method=TSSpredator
CADEHJ010000001.1	ANNOgesic	TSS	1426386	1426386	.	+	.	Name=TSS:1426386_f;ID=CADEHJ010000001.1_tss736;type=Primary;utr_length=Primary_133;associated_gene=OCPFDLNE_01436;libs=all;method=TSSpredator
CADEHJ010000001.1	ANNOgesic	TSS	1431646	1431646	.	+	.	Name=TSS:1431646_f;ID=CADEHJ010000001.1_tss737;type=Primary;utr_length=Primary_30;associated_gene=OCPFDLNE_01440;libs=all;method=TSSpredator
CADEHJ010000001.1	ANNOgesic	TSS	1434300	1434300	.	+	.	Name=TSS:1434300_f;ID=CADEHJ010000001.1_tss738;type=Primary;utr_length=Primary_27;associated_gene=OCPFDLNE_01442;libs=all;method=TSSpredator
CADEHJ010000001.1	ANNOgesic	TSS	1437165	1437165	.	+	.	Name=TSS:1437165_f;ID=CADEHJ010000001.1_tss739;type=Internal;utr_length=Internal_NA;associated_gene=OCPFDLNE_01445;libs=all;method=TSSpredator
CADEHJ010000001.1	ANNOgesic	TSS	1438212	1438212	.	+	.	Name=TSS:1438212_f;ID=CADEHJ010000001.1_tss740;type=Primary;utr_length=Primary_80;associated_gene=OCPFDLNE_01446;libs=all;method=TSSpredator
CADEHJ010000001.1	ANNOgesic	TSS	1439471	1439471	.	+	.	Name=TSS:1439471_f;ID=CADEHJ010000001.1_tss741;type=Primary;utr_length=Primary_168;associated_gene=OCPFDLNE_01447;libs=all;method=TSSpredator
CADEHJ010000001.1	ANNOgesic	TSS	1441289	1441289	.	+	.	Name=TSS:1441289_f;ID=CADEHJ010000001.1_tss742;type=Primary;utr_length=Primary_26;associated_gene=OCPFDLNE_01448;libs=all;method=TSSpredator
CADEHJ010000001.1	ANNOgesic	TSS	1443081	1443081	.	+	.	Name=TSS:1443081_f;ID=CADEHJ010000001.1_tss743;type=Primary;utr_length=Primary_29;associated_gene=OCPFDLNE_01451;libs=all;method=TSSpredator
CADEHJ010000001.1	ANNOgesic	TSS	1448444	1448444	.	+	.	Name=TSS:1448444_f;ID=CADEHJ010000001.1_tss744;type=Primary;utr_length=Primary_70;associated_gene=OCPFDLNE_01454;libs=all;method=TSSpredator
CADEHJ010000001.1	ANNOgesic	TSS	1452159	1452159	.	-	.	Name=TSS:1452159_r;ID=CADEHJ010000001.1_tss745;type=Primary;utr_length=Primary_26;associated_gene=OCPFDLNE_01456;libs=all;method=TSSpredator
CADEHJ010000001.1	ANNOgesic	TSS	1452297	1452297	.	+	.	Name=TSS:1452297_f;ID=CADEHJ010000001.1_tss746;type=Primary;utr_length=Primary_3;associated_gene=OCPFDLNE_01457;libs=all;method=TSSpredator
CADEHJ010000001.1	ANNOgesic	TSS	1453603	1453603	.	+	.	Name=TSS:1453603_f;ID=CADEHJ010000001.1_tss747;type=Primary;utr_length=Primary_23;associated_gene=OCPFDLNE_01458;libs=all;method=TSSpredator
CADEHJ010000001.1	ANNOgesic	TSS	1456588	1456588	.	-	.	Name=TSS:1456588_r;ID=CADEHJ010000001.1_tss748;type=Primary;utr_length=Primary_23;associated_gene=OCPFDLNE_01461;libs=all;method=TSSpredator
CADEHJ010000001.1	ANNOgesic	TSS	1457944	1457944	.	-	.	Name=TSS:1457944_r;ID=CADEHJ010000001.1_tss749;type=Primary;utr_length=Primary_24;associated_gene=OCPFDLNE_01462;libs=all;method=TSSpredator
CADEHJ010000001.1	ANNOgesic	TSS	1458034	1458034	.	+	.	Name=TSS:1458034_f;ID=CADEHJ010000001.1_tss750;type=Primary;utr_length=Primary_36;associated_gene=OCPFDLNE_01463;libs=all;method=TSSpredator
CADEHJ010000001.1	ANNOgesic	TSS	1459885	1459885	.	-	.	Name=TSS:1459885_r;ID=CADEHJ010000001.1_tss751;type=Primary;utr_length=Primary_25;associated_gene=OCPFDLNE_01464;libs=all;method=TSSpredator
CADEHJ010000001.1	ANNOgesic	TSS	1464658	1464658	.	+	.	Name=TSS:1464658_f;ID=CADEHJ010000001.1_tss752;type=Primary;utr_length=Primary_33;associated_gene=OCPFDLNE_01469;libs=all;method=TSSpredator
CADEHJ010000001.1	ANNOgesic	TSS	1468093	1468093	.	-	.	Name=TSS:1468093_r;ID=CADEHJ010000001.1_tss753;type=Primary;utr_length=Primary_38;associated_gene=OCPFDLNE_01471;libs=all;method=TSSpredator
CADEHJ010000001.1	ANNOgesic	TSS	1468207	1468207	.	+	.	Name=TSS:1468207_f;ID=CADEHJ010000001.1_tss754;type=Antisense;utr_length=Antisense_NA;associated_gene=OCPFDLNE_01472;libs=all;method=TSSpredator
CADEHJ010000001.1	ANNOgesic	TSS	1469564	1469564	.	-	.	Name=TSS:1469564_r;ID=CADEHJ010000001.1_tss755;type=Primary;utr_length=Primary_24;associated_gene=OCPFDLNE_01472;libs=all;method=TSSpredator
CADEHJ010000001.1	ANNOgesic	TSS	1473169	1473169	.	-	.	Name=TSS:1473169_r;ID=CADEHJ010000001.1_tss756;type=Primary;utr_length=Primary_49;associated_gene=OCPFDLNE_01476;libs=all;method=TSSpredator
CADEHJ010000001.1	ANNOgesic	TSS	1473355	1473355	.	-	.	Name=TSS:1473355_r;ID=CADEHJ010000001.1_tss757;type=Secondary;utr_length=Secondary_235;associated_gene=OCPFDLNE_01476;libs=all;method=TSSpredator
CADEHJ010000001.1	ANNOgesic	TSS	1474169	1474169	.	-	.	Name=TSS:1474169_r;ID=CADEHJ010000001.1_tss758;type=Primary;utr_length=Primary_197;associated_gene=OCPFDLNE_01477;libs=all;method=TSSpredator
CADEHJ010000001.1	ANNOgesic	TSS	1474621	1474621	.	-	.	Name=TSS:1474621_r;ID=CADEHJ010000001.1_tss759;type=Primary;utr_length=Primary_17;associated_gene=OCPFDLNE_01478;libs=all;method=TSSpredator
CADEHJ010000001.1	ANNOgesic	TSS	1474691	1474691	.	+	.	Name=TSS:1474691_f;ID=CADEHJ010000001.1_tss760;type=Primary,Antisense;utr_length=Primary_53,Antisense_NA;associated_gene=OCPFDLNE_01479,OCPFDLNE_01478;libs=all;method=TSSpredator
CADEHJ010000001.1	ANNOgesic	TSS	1477061	1477061	.	-	.	Name=TSS:1477061_r;ID=CADEHJ010000001.1_tss761;type=Primary;utr_length=Primary_27;associated_gene=OCPFDLNE_01480;libs=all;method=TSSpredator
CADEHJ010000001.1	ANNOgesic	TSS	1478442	1478442	.	-	.	Name=TSS:1478442_r;ID=CADEHJ010000001.1_tss762;type=Primary;utr_length=Primary_15;associated_gene=OCPFDLNE_01481;libs=all;method=TSSpredator
CADEHJ010000001.1	ANNOgesic	TSS	1481510	1481510	.	+	.	Name=TSS:1481510_f;ID=CADEHJ010000001.1_tss763;type=Antisense;utr_length=Antisense_NA;associated_gene=OCPFDLNE_01484;libs=all;method=TSSpredator
CADEHJ010000001.1	ANNOgesic	TSS	1483438	1483438	.	-	.	Name=TSS:1483438_r;ID=CADEHJ010000001.1_tss764;type=Primary;utr_length=Primary_73;associated_gene=OCPFDLNE_01485;libs=all;method=TSSpredator
CADEHJ010000001.1	ANNOgesic	TSS	1486579	1486579	.	-	.	Name=TSS:1486579_r;ID=CADEHJ010000001.1_tss765;type=Primary;utr_length=Primary_113;associated_gene=OCPFDLNE_01487;libs=all;method=TSSpredator
CADEHJ010000001.1	ANNOgesic	TSS	1486678	1486678	.	+	.	Name=TSS:1486678_f;ID=CADEHJ010000001.1_tss766;type=Primary;utr_length=Primary_90;associated_gene=OCPFDLNE_01488;libs=all;method=TSSpredator
CADEHJ010000001.1	ANNOgesic	TSS	1486708	1486708	.	-	.	Name=TSS:1486708_r;ID=CADEHJ010000001.1_tss767;type=Secondary,Antisense;utr_length=Secondary_242,Antisense_NA;associated_gene=OCPFDLNE_01487,OCPFDLNE_01488;libs=all;method=TSSpredator
CADEHJ010000001.1	ANNOgesic	TSS	1490840	1490840	.	-	.	Name=TSS:1490840_r;ID=CADEHJ010000001.1_tss768;type=Primary;utr_length=Primary_27;associated_gene=OCPFDLNE_01492;libs=all;method=TSSpredator
CADEHJ010000001.1	ANNOgesic	TSS	1493017	1493017	.	-	.	Name=TSS:1493017_r;ID=CADEHJ010000001.1_tss769;type=Primary;utr_length=Primary_35;associated_gene=OCPFDLNE_01495;libs=all;method=TSSpredator
CADEHJ010000001.1	ANNOgesic	TSS	1496112	1496112	.	+	.	Name=TSS:1496112_f;ID=CADEHJ010000001.1_tss770;type=Antisense;utr_length=Antisense_NA;associated_gene=OCPFDLNE_01498;libs=all;method=TSSpredator
CADEHJ010000001.1	ANNOgesic	TSS	1496309	1496309	.	-	.	Name=TSS:1496309_r;ID=CADEHJ010000001.1_tss771;type=Primary;utr_length=Primary_27;associated_gene=OCPFDLNE_01498;libs=all;method=TSSpredator
CADEHJ010000001.1	ANNOgesic	TSS	1496396	1496396	.	+	.	Name=TSS:1496396_f;ID=CADEHJ010000001.1_tss772;type=Primary;utr_length=Primary_32;associated_gene=OCPFDLNE_01499;libs=all;method=TSSpredator
CADEHJ010000001.1	ANNOgesic	TSS	1499374	1499374	.	-	.	Name=TSS:1499374_r;ID=CADEHJ010000001.1_tss773;type=Primary,Internal;utr_length=Primary_83,Internal_NA;associated_gene=OCPFDLNE_01501,OCPFDLNE_01502;libs=all;method=TSSpredator
CADEHJ010000001.1	ANNOgesic	TSS	1499402	1499402	.	-	.	Name=TSS:1499402_r;ID=CADEHJ010000001.1_tss774;type=Secondary,Internal;utr_length=Secondary_111,Internal_NA;associated_gene=OCPFDLNE_01501,OCPFDLNE_01502;libs=all;method=TSSpredator
CADEHJ010000001.1	ANNOgesic	TSS	1500537	1500537	.	-	.	Name=TSS:1500537_r;ID=CADEHJ010000001.1_tss775;type=Primary;utr_length=Primary_54;associated_gene=OCPFDLNE_01502;libs=all;method=TSSpredator
CADEHJ010000001.1	ANNOgesic	TSS	1503961	1503961	.	-	.	Name=TSS:1503961_r;ID=CADEHJ010000001.1_tss776;type=Primary;utr_length=Primary_29;associated_gene=OCPFDLNE_01505;libs=all;method=TSSpredator
CADEHJ010000001.1	ANNOgesic	TSS	1504410	1504410	.	-	.	Name=TSS:1504410_r;ID=CADEHJ010000001.1_tss777;type=Internal;utr_length=Internal_NA;associated_gene=OCPFDLNE_01506;libs=all;method=TSSpredator
CADEHJ010000001.1	ANNOgesic	TSS	1507163	1507163	.	-	.	Name=TSS:1507163_r;ID=CADEHJ010000001.1_tss778;type=Primary;utr_length=Primary_248;associated_gene=OCPFDLNE_01507;libs=all;method=TSSpredator
CADEHJ010000001.1	ANNOgesic	TSS	1507985	1507985	.	-	.	Name=TSS:1507985_r;ID=CADEHJ010000001.1_tss779;type=Primary;utr_length=Primary_22;associated_gene=OCPFDLNE_01508;libs=all;method=TSSpredator
CADEHJ010000001.1	ANNOgesic	TSS	1508070	1508070	.	+	.	Name=TSS:1508070_f;ID=CADEHJ010000001.1_tss780;type=Primary;utr_length=Primary_30;associated_gene=OCPFDLNE_01509;libs=all;method=TSSpredator
CADEHJ010000001.1	ANNOgesic	TSS	1514142	1514142	.	-	.	Name=TSS:1514142_r;ID=CADEHJ010000001.1_tss781;type=Primary;utr_length=Primary_36;associated_gene=OCPFDLNE_01515;libs=all;method=TSSpredator
CADEHJ010000001.1	ANNOgesic	TSS	1515057	1515057	.	-	.	Name=TSS:1515057_r;ID=CADEHJ010000001.1_tss782;type=Primary;utr_length=Primary_124;associated_gene=OCPFDLNE_01517;libs=all;method=TSSpredator
CADEHJ010000001.1	ANNOgesic	TSS	1516253	1516253	.	+	.	Name=TSS:1516253_f;ID=CADEHJ010000001.1_tss783;type=Antisense;utr_length=Antisense_NA;associated_gene=OCPFDLNE_01519;libs=all;method=TSSpredator
CADEHJ010000001.1	ANNOgesic	TSS	1518088	1518088	.	-	.	Name=TSS:1518088_r;ID=CADEHJ010000001.1_tss784;type=Primary;utr_length=Primary_39;associated_gene=OCPFDLNE_01520;libs=all;method=TSSpredator
CADEHJ010000001.1	ANNOgesic	TSS	1521765	1521765	.	-	.	Name=TSS:1521765_r;ID=CADEHJ010000001.1_tss785;type=Primary;utr_length=Primary_45;associated_gene=OCPFDLNE_01523;libs=all;method=TSSpredator
CADEHJ010000001.1	ANNOgesic	TSS	1523064	1523064	.	-	.	Name=TSS:1523064_r;ID=CADEHJ010000001.1_tss786;type=Primary;utr_length=Primary_40;associated_gene=OCPFDLNE_01524;libs=all;method=TSSpredator
CADEHJ010000001.1	ANNOgesic	TSS	1526349	1526349	.	-	.	Name=TSS:1526349_r;ID=CADEHJ010000001.1_tss787;type=Internal;utr_length=Internal_NA;associated_gene=OCPFDLNE_01527;libs=all;method=TSSpredator
CADEHJ010000001.1	ANNOgesic	TSS	1526611	1526611	.	-	.	Name=TSS:1526611_r;ID=CADEHJ010000001.1_tss788;type=Primary;utr_length=Primary_48;associated_gene=OCPFDLNE_01527;libs=all;method=TSSpredator
CADEHJ010000001.1	ANNOgesic	TSS	1526722	1526722	.	+	.	Name=TSS:1526722_f;ID=CADEHJ010000001.1_tss789;type=Primary;utr_length=Primary_74;associated_gene=OCPFDLNE_01528;libs=all;method=TSSpredator
CADEHJ010000001.1	ANNOgesic	TSS	1528195	1528195	.	-	.	Name=TSS:1528195_r;ID=CADEHJ010000001.1_tss790;type=Primary;utr_length=Primary_28;associated_gene=OCPFDLNE_01529;libs=all;method=TSSpredator
CADEHJ010000001.1	ANNOgesic	TSS	1531077	1531077	.	-	.	Name=TSS:1531077_r;ID=CADEHJ010000001.1_tss791;type=Primary;utr_length=Primary_25;associated_gene=OCPFDLNE_01531;libs=all;method=TSSpredator
CADEHJ010000001.1	ANNOgesic	TSS	1533741	1533741	.	-	.	Name=TSS:1533741_r;ID=CADEHJ010000001.1_tss792;type=Primary,Internal;utr_length=Primary_190,Internal_NA;associated_gene=OCPFDLNE_01535,OCPFDLNE_01536;libs=all;method=TSSpredator
CADEHJ010000001.1	ANNOgesic	TSS	1533817	1533817	.	-	.	Name=TSS:1533817_r;ID=CADEHJ010000001.1_tss793;type=Secondary,Internal;utr_length=Secondary_266,Internal_NA;associated_gene=OCPFDLNE_01535,OCPFDLNE_01536;libs=all;method=TSSpredator
CADEHJ010000001.1	ANNOgesic	TSS	1536916	1536916	.	-	.	Name=TSS:1536916_r;ID=CADEHJ010000001.1_tss794;type=Primary;utr_length=Primary_45;associated_gene=OCPFDLNE_01540;libs=all;method=TSSpredator
CADEHJ010000001.1	ANNOgesic	TSS	1536937	1536937	.	-	.	Name=TSS:1536937_r;ID=CADEHJ010000001.1_tss795;type=Secondary,Antisense;utr_length=Secondary_66,Antisense_NA;associated_gene=OCPFDLNE_01540,OCPFDLNE_01541;libs=all;method=TSSpredator
CADEHJ010000001.1	ANNOgesic	TSS	1537004	1537004	.	+	.	Name=TSS:1537004_f;ID=CADEHJ010000001.1_tss796;type=Primary;utr_length=Primary_29;associated_gene=OCPFDLNE_01541;libs=all;method=TSSpredator
CADEHJ010000001.1	ANNOgesic	TSS	1540357	1540357	.	-	.	Name=TSS:1540357_r;ID=CADEHJ010000001.1_tss797;type=Primary,Internal;utr_length=Primary_107,Internal_NA;associated_gene=OCPFDLNE_01543,OCPFDLNE_01544;libs=all;method=TSSpredator
CADEHJ010000001.1	ANNOgesic	TSS	1540870	1540870	.	-	.	Name=TSS:1540870_r;ID=CADEHJ010000001.1_tss798;type=Primary;utr_length=Primary_87;associated_gene=OCPFDLNE_01544;libs=all;method=TSSpredator
CADEHJ010000001.1	ANNOgesic	TSS	1540927	1540927	.	-	.	Name=TSS:1540927_r;ID=CADEHJ010000001.1_tss799;type=Secondary;utr_length=Secondary_144;associated_gene=OCPFDLNE_01544;libs=all;method=TSSpredator
CADEHJ010000001.1	ANNOgesic	TSS	1543432	1543432	.	-	.	Name=TSS:1543432_r;ID=CADEHJ010000001.1_tss800;type=Primary;utr_length=Primary_29;associated_gene=OCPFDLNE_01547;libs=all;method=TSSpredator
CADEHJ010000001.1	ANNOgesic	TSS	1543530	1543530	.	+	.	Name=TSS:1543530_f;ID=CADEHJ010000001.1_tss801;type=Primary;utr_length=Primary_76;associated_gene=OCPFDLNE_01548;libs=all;method=TSSpredator
CADEHJ010000001.1	ANNOgesic	TSS	1545310	1545310	.	-	.	Name=TSS:1545310_r;ID=CADEHJ010000001.1_tss802;type=Primary;utr_length=Primary_30;associated_gene=OCPFDLNE_01551;libs=all;method=TSSpredator
CADEHJ010000001.1	ANNOgesic	TSS	1548285	1548285	.	-	.	Name=TSS:1548285_r;ID=CADEHJ010000001.1_tss803;type=Primary;utr_length=Primary_274;associated_gene=OCPFDLNE_01552;libs=all;method=TSSpredator
CADEHJ010000001.1	ANNOgesic	TSS	1550441	1550441	.	+	.	Name=TSS:1550441_f;ID=CADEHJ010000001.1_tss804;type=Secondary,Antisense;utr_length=Secondary_253,Antisense_NA;associated_gene=OCPFDLNE_01555,OCPFDLNE_01554;libs=all;method=TSSpredator
CADEHJ010000001.1	ANNOgesic	TSS	1550674	1550674	.	+	.	Name=TSS:1550674_f;ID=CADEHJ010000001.1_tss805;type=Primary;utr_length=Primary_20;associated_gene=OCPFDLNE_01555;libs=all;method=TSSpredator
CADEHJ010000001.1	ANNOgesic	TSS	1556724	1556724	.	-	.	Name=TSS:1556724_r;ID=CADEHJ010000001.1_tss806;type=Primary;utr_length=Primary_23;associated_gene=OCPFDLNE_01559;libs=all;method=TSSpredator
CADEHJ010000001.1	ANNOgesic	TSS	1559148	1559148	.	-	.	Name=TSS:1559148_r;ID=CADEHJ010000001.1_tss807;type=Primary;utr_length=Primary_47;associated_gene=OCPFDLNE_01561;libs=all;method=TSSpredator
CADEHJ010000001.1	ANNOgesic	TSS	1559416	1559416	.	-	.	Name=TSS:1559416_r;ID=CADEHJ010000001.1_tss808;type=Orphan;utr_length=Orphan_NA;associated_gene=orphan;libs=all;method=TSSpredator
CADEHJ010000001.1	ANNOgesic	TSS	1560788	1560788	.	-	.	Name=TSS:1560788_r;ID=CADEHJ010000001.1_tss809;type=Primary;utr_length=Primary_24;associated_gene=OCPFDLNE_01562;libs=all;method=TSSpredator
CADEHJ010000001.1	ANNOgesic	TSS	1563273	1563273	.	+	.	Name=TSS:1563273_f;ID=CADEHJ010000001.1_tss810;type=Primary;utr_length=Primary_41;associated_gene=OCPFDLNE_01566;libs=all;method=TSSpredator
CADEHJ010000001.1	ANNOgesic	TSS	1567088	1567088	.	-	.	Name=TSS:1567088_r;ID=CADEHJ010000001.1_tss811;type=Primary;utr_length=Primary_300;associated_gene=OCPFDLNE_01568;libs=all;method=TSSpredator
CADEHJ010000001.1	ANNOgesic	TSS	1567196	1567196	.	+	.	Name=TSS:1567196_f;ID=CADEHJ010000001.1_tss812;type=Primary;utr_length=Primary_43;associated_gene=OCPFDLNE_01569;libs=all;method=TSSpredator
CADEHJ010000001.1	ANNOgesic	TSS	1571321	1571321	.	-	.	Name=TSS:1571321_r;ID=CADEHJ010000001.1_tss813;type=Primary;utr_length=Primary_79;associated_gene=OCPFDLNE_01571;libs=all;method=TSSpredator
CADEHJ010000001.1	ANNOgesic	TSS	1574328	1574328	.	-	.	Name=TSS:1574328_r;ID=CADEHJ010000001.1_tss814;type=Internal;utr_length=Internal_NA;associated_gene=OCPFDLNE_01573;libs=all;method=TSSpredator
CADEHJ010000001.1	ANNOgesic	TSS	1574784	1574784	.	-	.	Name=TSS:1574784_r;ID=CADEHJ010000001.1_tss815;type=Primary;utr_length=Primary_24;associated_gene=OCPFDLNE_01574;libs=all;method=TSSpredator
CADEHJ010000001.1	ANNOgesic	TSS	1577544	1577544	.	-	.	Name=TSS:1577544_r;ID=CADEHJ010000001.1_tss816;type=Primary;utr_length=Primary_33;associated_gene=OCPFDLNE_01576;libs=all;method=TSSpredator
CADEHJ010000001.1	ANNOgesic	TSS	1578117	1578117	.	-	.	Name=TSS:1578117_r;ID=CADEHJ010000001.1_tss817;type=Primary,Internal;utr_length=Primary_134,Internal_NA;associated_gene=OCPFDLNE_01577,OCPFDLNE_01578;libs=all;method=TSSpredator
CADEHJ010000001.1	ANNOgesic	TSS	1581933	1581933	.	-	.	Name=TSS:1581933_r;ID=CADEHJ010000001.1_tss818;type=Primary;utr_length=Primary_30;associated_gene=OCPFDLNE_01581;libs=all;method=TSSpredator
CADEHJ010000001.1	ANNOgesic	TSS	1583794	1583794	.	-	.	Name=TSS:1583794_r;ID=CADEHJ010000001.1_tss819;type=Primary;utr_length=Primary_37;associated_gene=OCPFDLNE_01583;libs=all;method=TSSpredator
CADEHJ010000001.1	ANNOgesic	TSS	1586105	1586105	.	-	.	Name=TSS:1586105_r;ID=CADEHJ010000001.1_tss820;type=Primary;utr_length=Primary_33;associated_gene=OCPFDLNE_01585;libs=all;method=TSSpredator
CADEHJ010000001.1	ANNOgesic	TSS	1588795	1588795	.	-	.	Name=TSS:1588795_r;ID=CADEHJ010000001.1_tss821;type=Secondary;utr_length=Secondary_177;associated_gene=OCPFDLNE_01587;libs=all;method=TSSpredator
CADEHJ010000001.1	ANNOgesic	TSS	1588873	1588873	.	-	.	Name=TSS:1588873_r;ID=CADEHJ010000001.1_tss822;type=Primary;utr_length=Primary_255;associated_gene=OCPFDLNE_01587;libs=all;method=TSSpredator
CADEHJ010000001.1	ANNOgesic	TSS	1590040	1590040	.	-	.	Name=TSS:1590040_r;ID=CADEHJ010000001.1_tss823;type=Primary;utr_length=Primary_107;associated_gene=OCPFDLNE_01590;libs=all;method=TSSpredator
CADEHJ010000001.1	ANNOgesic	TSS	1591477	1591477	.	-	.	Name=TSS:1591477_r;ID=CADEHJ010000001.1_tss824;type=Primary;utr_length=Primary_26;associated_gene=OCPFDLNE_01591;libs=all;method=TSSpredator
CADEHJ010000001.1	ANNOgesic	TSS	1593014	1593014	.	-	.	Name=TSS:1593014_r;ID=CADEHJ010000001.1_tss825;type=Primary;utr_length=Primary_19;associated_gene=OCPFDLNE_01593;libs=all;method=TSSpredator
CADEHJ010000001.1	ANNOgesic	TSS	1595693	1595693	.	-	.	Name=TSS:1595693_r;ID=CADEHJ010000001.1_tss826;type=Secondary;utr_length=Secondary_25;associated_gene=OCPFDLNE_01596;libs=all;method=TSSpredator
CADEHJ010000001.1	ANNOgesic	TSS	1595788	1595788	.	-	.	Name=TSS:1595788_r;ID=CADEHJ010000001.1_tss827;type=Primary;utr_length=Primary_120;associated_gene=OCPFDLNE_01596;libs=all;method=TSSpredator
CADEHJ010000001.1	ANNOgesic	TSS	1597266	1597266	.	+	.	Name=TSS:1597266_f;ID=CADEHJ010000001.1_tss828;type=Antisense;utr_length=Antisense_NA;associated_gene=OCPFDLNE_01598;libs=all;method=TSSpredator
CADEHJ010000001.1	ANNOgesic	TSS	1602016	1602016	.	-	.	Name=TSS:1602016_r;ID=CADEHJ010000001.1_tss829;type=Primary;utr_length=Primary_286;associated_gene=OCPFDLNE_01600;libs=all;method=TSSpredator
CADEHJ010000001.1	ANNOgesic	TSS	1607316	1607316	.	-	.	Name=TSS:1607316_r;ID=CADEHJ010000001.1_tss830;type=Primary;utr_length=Primary_31;associated_gene=OCPFDLNE_01605;libs=all;method=TSSpredator
CADEHJ010000001.1	ANNOgesic	TSS	1608026	1608026	.	-	.	Name=TSS:1608026_r;ID=CADEHJ010000001.1_tss831;type=Primary;utr_length=Primary_29;associated_gene=OCPFDLNE_01606;libs=all;method=TSSpredator
CADEHJ010000001.1	ANNOgesic	TSS	1608221	1608221	.	-	.	Name=TSS:1608221_r;ID=CADEHJ010000001.1_tss832;type=Secondary,Internal;utr_length=Secondary_224,Internal_NA;associated_gene=OCPFDLNE_01606,OCPFDLNE_01607;libs=all;method=TSSpredator
CADEHJ010000001.1	ANNOgesic	TSS	1610333	1610333	.	-	.	Name=TSS:1610333_r;ID=CADEHJ010000001.1_tss833;type=Orphan;utr_length=Orphan_NA;associated_gene=orphan;libs=all;method=TSSpredator
CADEHJ010000001.1	ANNOgesic	TSS	1613202	1613202	.	-	.	Name=TSS:1613202_r;ID=CADEHJ010000001.1_tss834;type=Primary;utr_length=Primary_46;associated_gene=OCPFDLNE_01610;libs=all;method=TSSpredator
CADEHJ010000001.1	ANNOgesic	TSS	1617357	1617357	.	-	.	Name=TSS:1617357_r;ID=CADEHJ010000001.1_tss835;type=Primary;utr_length=Primary_32;associated_gene=OCPFDLNE_01613;libs=all;method=TSSpredator
CADEHJ010000001.1	ANNOgesic	TSS	1620944	1620944	.	-	.	Name=TSS:1620944_r;ID=CADEHJ010000001.1_tss836;type=Primary;utr_length=Primary_19;associated_gene=OCPFDLNE_01617;libs=all;method=TSSpredator
CADEHJ010000001.1	ANNOgesic	TSS	1622834	1622834	.	-	.	Name=TSS:1622834_r;ID=CADEHJ010000001.1_tss837;type=Secondary;utr_length=Secondary_34;associated_gene=OCPFDLNE_01618;libs=all;method=TSSpredator
CADEHJ010000001.1	ANNOgesic	TSS	1622986	1622986	.	-	.	Name=TSS:1622986_r;ID=CADEHJ010000001.1_tss838;type=Primary;utr_length=Primary_186;associated_gene=OCPFDLNE_01618;libs=all;method=TSSpredator
CADEHJ010000001.1	ANNOgesic	TSS	1624084	1624084	.	-	.	Name=TSS:1624084_r;ID=CADEHJ010000001.1_tss839;type=Primary;utr_length=Primary_42;associated_gene=OCPFDLNE_01619;libs=all;method=TSSpredator
CADEHJ010000001.1	ANNOgesic	TSS	1625298	1625298	.	-	.	Name=TSS:1625298_r;ID=CADEHJ010000001.1_tss840;type=Primary,Internal;utr_length=Primary_16,Internal_NA;associated_gene=OCPFDLNE_01620,OCPFDLNE_01621;libs=all;method=TSSpredator
CADEHJ010000001.1	ANNOgesic	TSS	1626328	1626328	.	-	.	Name=TSS:1626328_r;ID=CADEHJ010000001.1_tss841;type=Primary;utr_length=Primary_172;associated_gene=OCPFDLNE_01621;libs=all;method=TSSpredator
CADEHJ010000001.1	ANNOgesic	TSS	1629726	1629726	.	-	.	Name=TSS:1629726_r;ID=CADEHJ010000001.1_tss842;type=Primary;utr_length=Primary_26;associated_gene=OCPFDLNE_01622;libs=all;method=TSSpredator
CADEHJ010000001.1	ANNOgesic	TSS	1632837	1632837	.	-	.	Name=TSS:1632837_r;ID=CADEHJ010000001.1_tss843;type=Primary;utr_length=Primary_34;associated_gene=OCPFDLNE_01625;libs=all;method=TSSpredator
CADEHJ010000001.1	ANNOgesic	TSS	1632852	1632852	.	-	.	Name=TSS:1632852_r;ID=CADEHJ010000001.1_tss844;type=Secondary;utr_length=Secondary_49;associated_gene=OCPFDLNE_01625;libs=all;method=TSSpredator
CADEHJ010000001.1	ANNOgesic	TSS	1632941	1632941	.	+	.	Name=TSS:1632941_f;ID=CADEHJ010000001.1_tss845;type=Primary;utr_length=Primary_27;associated_gene=OCPFDLNE_01626;libs=all;method=TSSpredator
CADEHJ010000001.1	ANNOgesic	TSS	1633055	1633055	.	-	.	Name=TSS:1633055_r;ID=CADEHJ010000001.1_tss846;type=Secondary,Antisense;utr_length=Secondary_252,Antisense_NA;associated_gene=OCPFDLNE_01625,OCPFDLNE_01626;libs=all;method=TSSpredator
CADEHJ010000001.1	ANNOgesic	TSS	1635271	1635271	.	-	.	Name=TSS:1635271_r;ID=CADEHJ010000001.1_tss847;type=Primary;utr_length=Primary_51;associated_gene=OCPFDLNE_01627;libs=all;method=TSSpredator
CADEHJ010000001.1	ANNOgesic	TSS	1635425	1635425	.	+	.	Name=TSS:1635425_f;ID=CADEHJ010000001.1_tss848;type=Primary;utr_length=Primary_36;associated_gene=OCPFDLNE_01628;libs=all;method=TSSpredator
CADEHJ010000001.1	ANNOgesic	TSS	1638226	1638226	.	-	.	Name=TSS:1638226_r;ID=CADEHJ010000001.1_tss849;type=Primary;utr_length=Primary_35;associated_gene=OCPFDLNE_01630;libs=all;method=TSSpredator
CADEHJ010000001.1	ANNOgesic	TSS	1638913	1638913	.	-	.	Name=TSS:1638913_r;ID=CADEHJ010000001.1_tss850;type=Primary;utr_length=Primary_34;associated_gene=OCPFDLNE_01631;libs=all;method=TSSpredator
CADEHJ010000001.1	ANNOgesic	TSS	1640537	1640537	.	-	.	Name=TSS:1640537_r;ID=CADEHJ010000001.1_tss851;type=Primary;utr_length=Primary_27;associated_gene=OCPFDLNE_01633;libs=all;method=TSSpredator
CADEHJ010000001.1	ANNOgesic	TSS	1640654	1640654	.	+	.	Name=TSS:1640654_f;ID=CADEHJ010000001.1_tss852;type=Primary;utr_length=Primary_35;associated_gene=OCPFDLNE_01634;libs=all;method=TSSpredator
CADEHJ010000001.1	ANNOgesic	TSS	1645086	1645086	.	-	.	Name=TSS:1645086_r;ID=CADEHJ010000001.1_tss853;type=Internal;utr_length=Internal_NA;associated_gene=OCPFDLNE_01638;libs=all;method=TSSpredator
CADEHJ010000001.1	ANNOgesic	TSS	1651136	1651136	.	-	.	Name=TSS:1651136_r;ID=CADEHJ010000001.1_tss854;type=Primary;utr_length=Primary_132;associated_gene=OCPFDLNE_01642;libs=all;method=TSSpredator
CADEHJ010000001.1	ANNOgesic	TSS	1651267	1651267	.	+	.	Name=TSS:1651267_f;ID=CADEHJ010000001.1_tss855;type=Primary;utr_length=Primary_30;associated_gene=OCPFDLNE_01643;libs=all;method=TSSpredator
CADEHJ010000001.1	ANNOgesic	TSS	1651819	1651819	.	+	.	Name=TSS:1651819_f;ID=CADEHJ010000001.1_tss856;type=Primary;utr_length=Primary_178;associated_gene=OCPFDLNE_01644;libs=all;method=TSSpredator
CADEHJ010000001.1	ANNOgesic	TSS	1654242	1654242	.	-	.	Name=TSS:1654242_r;ID=CADEHJ010000001.1_tss857;type=Primary;utr_length=Primary_283;associated_gene=OCPFDLNE_01645;libs=all;method=TSSpredator
CADEHJ010000001.1	ANNOgesic	TSS	1655358	1655358	.	-	.	Name=TSS:1655358_r;ID=CADEHJ010000001.1_tss858;type=Primary;utr_length=Primary_70;associated_gene=OCPFDLNE_01646;libs=all;method=TSSpredator
CADEHJ010000001.1	ANNOgesic	TSS	1656643	1656643	.	-	.	Name=TSS:1656643_r;ID=CADEHJ010000001.1_tss859;type=Secondary;utr_length=Secondary_36;associated_gene=OCPFDLNE_01647;libs=all;method=TSSpredator
CADEHJ010000001.1	ANNOgesic	TSS	1656728	1656728	.	-	.	Name=TSS:1656728_r;ID=CADEHJ010000001.1_tss860;type=Primary;utr_length=Primary_121;associated_gene=OCPFDLNE_01647;libs=all;method=TSSpredator
CADEHJ010000001.1	ANNOgesic	TSS	1657849	1657849	.	-	.	Name=TSS:1657849_r;ID=CADEHJ010000001.1_tss861;type=Primary;utr_length=Primary_20;associated_gene=OCPFDLNE_01649;libs=all;method=TSSpredator
CADEHJ010000001.1	ANNOgesic	TSS	1657931	1657931	.	-	.	Name=TSS:1657931_r;ID=CADEHJ010000001.1_tss862;type=Secondary;utr_length=Secondary_102;associated_gene=OCPFDLNE_01649;libs=all;method=TSSpredator
CADEHJ010000001.1	ANNOgesic	TSS	1658127	1658127	.	+	.	Name=TSS:1658127_f;ID=CADEHJ010000001.1_tss863;type=Internal;utr_length=Internal_NA;associated_gene=OCPFDLNE_01650;libs=all;method=TSSpredator
CADEHJ010000001.1	ANNOgesic	TSS	1659823	1659823	.	-	.	Name=TSS:1659823_r;ID=CADEHJ010000001.1_tss864;type=Primary;utr_length=Primary_41;associated_gene=OCPFDLNE_01651;libs=all;method=TSSpredator
CADEHJ010000001.1	ANNOgesic	TSS	1661439	1661439	.	-	.	Name=TSS:1661439_r;ID=CADEHJ010000001.1_tss865;type=Primary;utr_length=Primary_169;associated_gene=OCPFDLNE_01652;libs=all;method=TSSpredator
CADEHJ010000001.1	ANNOgesic	TSS	1664013	1664013	.	-	.	Name=TSS:1664013_r;ID=CADEHJ010000001.1_tss866;type=Primary;utr_length=Primary_97;associated_gene=OCPFDLNE_01653;libs=all;method=TSSpredator
CADEHJ010000001.1	ANNOgesic	TSS	1664885	1664885	.	-	.	Name=TSS:1664885_r;ID=CADEHJ010000001.1_tss867;type=Primary,Internal;utr_length=Primary_42,Internal_NA;associated_gene=OCPFDLNE_01654,OCPFDLNE_01655;libs=all;method=TSSpredator
CADEHJ010000001.1	ANNOgesic	TSS	1666023	1666023	.	-	.	Name=TSS:1666023_r;ID=CADEHJ010000001.1_tss868;type=Primary;utr_length=Primary_28;associated_gene=OCPFDLNE_01656;libs=all;method=TSSpredator
CADEHJ010000001.1	ANNOgesic	TSS	1667419	1667419	.	-	.	Name=TSS:1667419_r;ID=CADEHJ010000001.1_tss869;type=Primary;utr_length=Primary_28;associated_gene=OCPFDLNE_01657;libs=all;method=TSSpredator
CADEHJ010000001.1	ANNOgesic	TSS	1667528	1667528	.	+	.	Name=TSS:1667528_f;ID=CADEHJ010000001.1_tss870;type=Primary;utr_length=Primary_61;associated_gene=OCPFDLNE_01658;libs=all;method=TSSpredator
CADEHJ010000001.1	ANNOgesic	TSS	1668259	1668259	.	-	.	Name=TSS:1668259_r;ID=CADEHJ010000001.1_tss871;type=Primary;utr_length=Primary_50;associated_gene=OCPFDLNE_01659;libs=all;method=TSSpredator
CADEHJ010000001.1	ANNOgesic	TSS	1669302	1669302	.	-	.	Name=TSS:1669302_r;ID=CADEHJ010000001.1_tss872;type=Primary,Internal;utr_length=Primary_132,Internal_NA;associated_gene=OCPFDLNE_01660,OCPFDLNE_01661;libs=all;method=TSSpredator
CADEHJ010000001.1	ANNOgesic	TSS	1670741	1670741	.	-	.	Name=TSS:1670741_r;ID=CADEHJ010000001.1_tss873;type=Primary;utr_length=Primary_77;associated_gene=OCPFDLNE_01662;libs=all;method=TSSpredator
CADEHJ010000001.1	ANNOgesic	TSS	1672831	1672831	.	-	.	Name=TSS:1672831_r;ID=CADEHJ010000001.1_tss874;type=Primary;utr_length=Primary_52;associated_gene=OCPFDLNE_01664;libs=all;method=TSSpredator
CADEHJ010000001.1	ANNOgesic	TSS	1675426	1675426	.	-	.	Name=TSS:1675426_r;ID=CADEHJ010000001.1_tss875;type=Primary;utr_length=Primary_28;associated_gene=OCPFDLNE_01666;libs=all;method=TSSpredator
CADEHJ010000001.1	ANNOgesic	TSS	1675922	1675922	.	+	.	Name=TSS:1675922_f;ID=CADEHJ010000001.1_tss876;type=Primary,Antisense;utr_length=Primary_69,Antisense_NA;associated_gene=OCPFDLNE_01668,OCPFDLNE_01667;libs=all;method=TSSpredator
CADEHJ010000001.1	ANNOgesic	TSS	1675930	1675930	.	-	.	Name=TSS:1675930_r;ID=CADEHJ010000001.1_tss877;type=Primary,Antisense;utr_length=Primary_44,Antisense_NA;associated_gene=OCPFDLNE_01667,OCPFDLNE_01668;libs=all;method=TSSpredator
CADEHJ010000001.1	ANNOgesic	TSS	1678305	1678305	.	-	.	Name=TSS:1678305_r;ID=CADEHJ010000001.1_tss878;type=Internal;utr_length=Internal_NA;associated_gene=OCPFDLNE_01670;libs=all;method=TSSpredator
CADEHJ010000001.1	ANNOgesic	TSS	1679153	1679153	.	-	.	Name=TSS:1679153_r;ID=CADEHJ010000001.1_tss879;type=Primary;utr_length=Primary_17;associated_gene=OCPFDLNE_01670;libs=all;method=TSSpredator
CADEHJ010000001.1	ANNOgesic	TSS	1679169	1679169	.	-	.	Name=TSS:1679169_r;ID=CADEHJ010000001.1_tss880;type=Secondary;utr_length=Secondary_33;associated_gene=OCPFDLNE_01670;libs=all;method=TSSpredator
CADEHJ010000001.1	ANNOgesic	TSS	1681409	1681409	.	-	.	Name=TSS:1681409_r;ID=CADEHJ010000001.1_tss881;type=Primary;utr_length=Primary_27;associated_gene=OCPFDLNE_01672;libs=all;method=TSSpredator
CADEHJ010000001.1	ANNOgesic	TSS	1688332	1688332	.	-	.	Name=TSS:1688332_r;ID=CADEHJ010000001.1_tss882;type=Orphan;utr_length=Orphan_NA;associated_gene=orphan;libs=all;method=TSSpredator
CADEHJ010000001.1	ANNOgesic	TSS	1688702	1688702	.	+	.	Name=TSS:1688702_f;ID=CADEHJ010000001.1_tss883;type=Primary;utr_length=Primary_123;associated_gene=OCPFDLNE_01680;libs=all;method=TSSpredator
CADEHJ010000001.1	ANNOgesic	TSS	1691531	1691531	.	+	.	Name=TSS:1691531_f;ID=CADEHJ010000001.1_tss884;type=Primary;utr_length=Primary_17;associated_gene=OCPFDLNE_01681;libs=all;method=TSSpredator
CADEHJ010000001.1	ANNOgesic	TSS	1692034	1692034	.	+	.	Name=TSS:1692034_f;ID=CADEHJ010000001.1_tss885;type=Primary;utr_length=Primary_26;associated_gene=OCPFDLNE_01682;libs=all;method=TSSpredator
CADEHJ010000001.1	ANNOgesic	TSS	1695650	1695650	.	-	.	Name=TSS:1695650_r;ID=CADEHJ010000001.1_tss886;type=Primary,Internal;utr_length=Primary_18,Internal_NA;associated_gene=OCPFDLNE_01685,OCPFDLNE_01686;libs=all;method=TSSpredator
CADEHJ010000001.1	ANNOgesic	TSS	1695895	1695895	.	-	.	Name=TSS:1695895_r;ID=CADEHJ010000001.1_tss887;type=Primary;utr_length=Primary_17;associated_gene=OCPFDLNE_01686;libs=all;method=TSSpredator
CADEHJ010000001.1	ANNOgesic	TSS	1698721	1698721	.	-	.	Name=TSS:1698721_r;ID=CADEHJ010000001.1_tss888;type=Primary;utr_length=Primary_40;associated_gene=OCPFDLNE_01687;libs=all;method=TSSpredator
CADEHJ010000001.1	ANNOgesic	TSS	1700580	1700580	.	-	.	Name=TSS:1700580_r;ID=CADEHJ010000001.1_tss889;type=Internal;utr_length=Internal_NA;associated_gene=OCPFDLNE_01690;libs=all;method=TSSpredator
CADEHJ010000001.1	ANNOgesic	TSS	1703338	1703338	.	-	.	Name=TSS:1703338_r;ID=CADEHJ010000001.1_tss890;type=Primary;utr_length=Primary_35;associated_gene=OCPFDLNE_01690;libs=all;method=TSSpredator
CADEHJ010000001.1	ANNOgesic	TSS	1707656	1707656	.	+	.	Name=TSS:1707656_f;ID=CADEHJ010000001.1_tss891;type=Primary,Antisense;utr_length=Primary_39,Antisense_NA;associated_gene=OCPFDLNE_01693,OCPFDLNE_01692;libs=all;method=TSSpredator
CADEHJ010000001.1	ANNOgesic	TSS	1708190	1708190	.	-	.	Name=TSS:1708190_r;ID=CADEHJ010000001.1_tss892;type=Antisense;utr_length=Antisense_NA;associated_gene=OCPFDLNE_01693;libs=all;method=TSSpredator
CADEHJ010000001.1	ANNOgesic	TSS	1708733	1708733	.	-	.	Name=TSS:1708733_r;ID=CADEHJ010000001.1_tss893;type=Primary;utr_length=Primary_16;associated_gene=OCPFDLNE_01694;libs=all;method=TSSpredator
CADEHJ010000001.1	ANNOgesic	TSS	1709517	1709517	.	-	.	Name=TSS:1709517_r;ID=CADEHJ010000001.1_tss894;type=Primary;utr_length=Primary_111;associated_gene=OCPFDLNE_01695;libs=all;method=TSSpredator
CADEHJ010000001.1	ANNOgesic	TSS	1710103	1710103	.	-	.	Name=TSS:1710103_r;ID=CADEHJ010000001.1_tss895;type=Primary;utr_length=Primary_35;associated_gene=OCPFDLNE_01696;libs=all;method=TSSpredator
CADEHJ010000001.1	ANNOgesic	TSS	1713958	1713958	.	-	.	Name=TSS:1713958_r;ID=CADEHJ010000001.1_tss896;type=Primary;utr_length=Primary_251;associated_gene=OCPFDLNE_01698;libs=all;method=TSSpredator
CADEHJ010000001.1	ANNOgesic	TSS	1717076	1717076	.	-	.	Name=TSS:1717076_r;ID=CADEHJ010000001.1_tss897;type=Primary;utr_length=Primary_32;associated_gene=OCPFDLNE_01702;libs=all;method=TSSpredator
CADEHJ010000001.1	ANNOgesic	TSS	1717393	1717393	.	+	.	Name=TSS:1717393_f;ID=CADEHJ010000001.1_tss898;type=Orphan;utr_length=Orphan_NA;associated_gene=orphan;libs=all;method=TSSpredator
CADEHJ010000001.1	ANNOgesic	TSS	1719464	1719464	.	-	.	Name=TSS:1719464_r;ID=CADEHJ010000001.1_tss899;type=Primary;utr_length=Primary_133;associated_gene=OCPFDLNE_01704;libs=all;method=TSSpredator
CADEHJ010000001.1	ANNOgesic	TSS	1720567	1720567	.	-	.	Name=TSS:1720567_r;ID=CADEHJ010000001.1_tss900;type=Antisense;utr_length=Antisense_NA;associated_gene=OCPFDLNE_01705;libs=all;method=TSSpredator
CADEHJ010000001.1	ANNOgesic	TSS	1724381	1724381	.	-	.	Name=TSS:1724381_r;ID=CADEHJ010000001.1_tss901;type=Primary;utr_length=Primary_278;associated_gene=OCPFDLNE_01707;libs=all;method=TSSpredator
CADEHJ010000001.1	ANNOgesic	TSS	1724469	1724469	.	+	.	Name=TSS:1724469_f;ID=CADEHJ010000001.1_tss902;type=Primary;utr_length=Primary_29;associated_gene=OCPFDLNE_01708;libs=all;method=TSSpredator
CADEHJ010000001.1	ANNOgesic	TSS	1727975	1727975	.	-	.	Name=TSS:1727975_r;ID=CADEHJ010000001.1_tss903;type=Primary;utr_length=Primary_50;associated_gene=OCPFDLNE_01710;libs=all;method=TSSpredator
CADEHJ010000001.1	ANNOgesic	TSS	1729491	1729491	.	-	.	Name=TSS:1729491_r;ID=CADEHJ010000001.1_tss904;type=Primary;utr_length=Primary_230;associated_gene=OCPFDLNE_01711;libs=all;method=TSSpredator
CADEHJ010000001.1	ANNOgesic	TSS	1729644	1729644	.	+	.	Name=TSS:1729644_f;ID=CADEHJ010000001.1_tss905;type=Primary;utr_length=Primary_40;associated_gene=OCPFDLNE_01712;libs=all;method=TSSpredator
CADEHJ010000001.1	ANNOgesic	TSS	1735216	1735216	.	-	.	Name=TSS:1735216_r;ID=CADEHJ010000001.1_tss906;type=Primary;utr_length=Primary_62;associated_gene=OCPFDLNE_01713;libs=all;method=TSSpredator
CADEHJ010000001.1	ANNOgesic	TSS	1736445	1736445	.	-	.	Name=TSS:1736445_r;ID=CADEHJ010000001.1_tss907;type=Primary;utr_length=Primary_27;associated_gene=OCPFDLNE_01715;libs=all;method=TSSpredator
CADEHJ010000001.1	ANNOgesic	TSS	1736995	1736995	.	+	.	Name=TSS:1736995_f;ID=CADEHJ010000001.1_tss908;type=Primary,Antisense;utr_length=Primary_27,Antisense_NA;associated_gene=OCPFDLNE_01717,OCPFDLNE_01716;libs=all;method=TSSpredator
CADEHJ010000001.1	ANNOgesic	TSS	1737280	1737280	.	-	.	Name=TSS:1737280_r;ID=CADEHJ010000001.1_tss909;type=Antisense;utr_length=Antisense_NA;associated_gene=OCPFDLNE_01717;libs=all;method=TSSpredator
CADEHJ010000001.1	ANNOgesic	TSS	1737362	1737362	.	+	.	Name=TSS:1737362_f;ID=CADEHJ010000001.1_tss910;type=Primary;utr_length=Primary_76;associated_gene=OCPFDLNE_01718;libs=all;method=TSSpredator
CADEHJ010000001.1	ANNOgesic	TSS	1742627	1742627	.	+	.	Name=TSS:1742627_f;ID=CADEHJ010000001.1_tss911;type=Antisense;utr_length=Antisense_NA;associated_gene=OCPFDLNE_01722;libs=all;method=TSSpredator
CADEHJ010000001.1	ANNOgesic	TSS	1744632	1744632	.	-	.	Name=TSS:1744632_r;ID=CADEHJ010000001.1_tss912;type=Primary;utr_length=Primary_26;associated_gene=OCPFDLNE_01723;libs=all;method=TSSpredator
CADEHJ010000001.1	ANNOgesic	TSS	1744740	1744740	.	+	.	Name=TSS:1744740_f;ID=CADEHJ010000001.1_tss913;type=Primary;utr_length=Primary_41;associated_gene=OCPFDLNE_01724;libs=all;method=TSSpredator
CADEHJ010000001.1	ANNOgesic	TSS	1749747	1749747	.	-	.	Name=TSS:1749747_r;ID=CADEHJ010000001.1_tss914;type=Internal;utr_length=Internal_NA;associated_gene=OCPFDLNE_01727;libs=all;method=TSSpredator
CADEHJ010000001.1	ANNOgesic	TSS	1752460	1752460	.	-	.	Name=TSS:1752460_r;ID=CADEHJ010000001.1_tss915;type=Primary;utr_length=Primary_217;associated_gene=OCPFDLNE_01728;libs=all;method=TSSpredator
CADEHJ010000001.1	ANNOgesic	TSS	1753866	1753866	.	-	.	Name=TSS:1753866_r;ID=CADEHJ010000001.1_tss916;type=Primary,Internal;utr_length=Primary_52,Internal_NA;associated_gene=OCPFDLNE_01730,OCPFDLNE_01731;libs=all;method=TSSpredator
CADEHJ010000001.1	ANNOgesic	TSS	1754016	1754016	.	-	.	Name=TSS:1754016_r;ID=CADEHJ010000001.1_tss917;type=Primary,Internal;utr_length=Primary_107,Internal_NA;associated_gene=OCPFDLNE_01731,OCPFDLNE_01732;libs=all;method=TSSpredator
CADEHJ010000001.1	ANNOgesic	TSS	1754192	1754192	.	-	.	Name=TSS:1754192_r;ID=CADEHJ010000001.1_tss918;type=Primary;utr_length=Primary_0;associated_gene=OCPFDLNE_01734;libs=all;method=TSSpredator
CADEHJ010000001.1	ANNOgesic	TSS	1754547	1754547	.	-	.	Name=TSS:1754547_r;ID=CADEHJ010000001.1_tss919;type=Primary,Internal;utr_length=Primary_78,Internal_NA;associated_gene=OCPFDLNE_01737,OCPFDLNE_01738;libs=all;method=TSSpredator
CADEHJ010000001.1	ANNOgesic	TSS	1754679	1754679	.	-	.	Name=TSS:1754679_r;ID=CADEHJ010000001.1_tss920;type=Primary,Internal;utr_length=Primary_131,Internal_NA;associated_gene=OCPFDLNE_01738,OCPFDLNE_01739;libs=all;method=TSSpredator
CADEHJ010000001.1	ANNOgesic	TSS	1754860	1754860	.	-	.	Name=TSS:1754860_r;ID=CADEHJ010000001.1_tss921;type=Primary,Internal;utr_length=Primary_85,Internal_NA;associated_gene=OCPFDLNE_01740,OCPFDLNE_01741;libs=all;method=TSSpredator
CADEHJ010000001.1	ANNOgesic	TSS	1755071	1755071	.	-	.	Name=TSS:1755071_r;ID=CADEHJ010000001.1_tss922;type=Primary;utr_length=Primary_0;associated_gene=OCPFDLNE_01743;libs=all;method=TSSpredator
CADEHJ010000001.1	ANNOgesic	TSS	1755339	1755339	.	-	.	Name=TSS:1755339_r;ID=CADEHJ010000001.1_tss923;type=Primary;utr_length=Primary_0;associated_gene=OCPFDLNE_01746;libs=all;method=TSSpredator
CADEHJ010000001.1	ANNOgesic	TSS	1755631	1755631	.	-	.	Name=TSS:1755631_r;ID=CADEHJ010000001.1_tss924;type=Secondary;utr_length=Secondary_0;associated_gene=OCPFDLNE_01749;libs=all;method=TSSpredator
CADEHJ010000001.1	ANNOgesic	TSS	1755712	1755712	.	-	.	Name=TSS:1755712_r;ID=CADEHJ010000001.1_tss925;type=Primary,Internal;utr_length=Primary_81,Internal_NA;associated_gene=OCPFDLNE_01749,OCPFDLNE_01750;libs=all;method=TSSpredator
CADEHJ010000001.1	ANNOgesic	TSS	1755837	1755837	.	-	.	Name=TSS:1755837_r;ID=CADEHJ010000001.1_tss926;type=Primary;utr_length=Primary_3;associated_gene=OCPFDLNE_01751;libs=all;method=TSSpredator
CADEHJ010000001.1	ANNOgesic	TSS	1760643	1760643	.	-	.	Name=TSS:1760643_r;ID=CADEHJ010000001.1_tss927;type=Primary;utr_length=Primary_4;associated_gene=OCPFDLNE_01753;libs=all;method=TSSpredator
CADEHJ010000001.1	ANNOgesic	TSS	1760884	1760884	.	-	.	Name=TSS:1760884_r;ID=CADEHJ010000001.1_tss928;type=Secondary;utr_length=Secondary_245;associated_gene=OCPFDLNE_01753;libs=all;method=TSSpredator
CADEHJ010000001.1	ANNOgesic	TSS	1761559	1761559	.	-	.	Name=TSS:1761559_r;ID=CADEHJ010000001.1_tss929;type=Primary;utr_length=Primary_31;associated_gene=OCPFDLNE_01754;libs=all;method=TSSpredator
CADEHJ010000001.1	ANNOgesic	TSS	1762587	1762587	.	-	.	Name=TSS:1762587_r;ID=CADEHJ010000001.1_tss930;type=Primary;utr_length=Primary_29;associated_gene=OCPFDLNE_01755;libs=all;method=TSSpredator
CADEHJ010000001.1	ANNOgesic	TSS	1762675	1762675	.	+	.	Name=TSS:1762675_f;ID=CADEHJ010000001.1_tss931;type=Primary;utr_length=Primary_28;associated_gene=OCPFDLNE_01756;libs=all;method=TSSpredator
CADEHJ010000001.1	ANNOgesic	TSS	1764046	1764046	.	+	.	Name=TSS:1764046_f;ID=CADEHJ010000001.1_tss932;type=Primary;utr_length=Primary_62;associated_gene=OCPFDLNE_01757;libs=all;method=TSSpredator
CADEHJ010000001.1	ANNOgesic	TSS	1765800	1765800	.	-	.	Name=TSS:1765800_r;ID=CADEHJ010000001.1_tss933;type=Primary;utr_length=Primary_35;associated_gene=OCPFDLNE_01758;libs=all;method=TSSpredator
CADEHJ010000001.1	ANNOgesic	TSS	1766662	1766662	.	-	.	Name=TSS:1766662_r;ID=CADEHJ010000001.1_tss934;type=Internal;utr_length=Internal_NA;associated_gene=OCPFDLNE_01759;libs=all;method=TSSpredator
CADEHJ010000001.1	ANNOgesic	TSS	1767833	1767833	.	+	.	Name=TSS:1767833_f;ID=CADEHJ010000001.1_tss935;type=Secondary,Antisense;utr_length=Secondary_135,Antisense_NA;associated_gene=OCPFDLNE_01761,OCPFDLNE_01760;libs=all;method=TSSpredator
CADEHJ010000001.1	ANNOgesic	TSS	1767848	1767848	.	+	.	Name=TSS:1767848_f;ID=CADEHJ010000001.1_tss936;type=Primary,Antisense;utr_length=Primary_120,Antisense_NA;associated_gene=OCPFDLNE_01761,OCPFDLNE_01760;libs=all;method=TSSpredator
CADEHJ010000001.1	ANNOgesic	TSS	1770513	1770513	.	-	.	Name=TSS:1770513_r;ID=CADEHJ010000001.1_tss937;type=Primary,Antisense;utr_length=Primary_16,Antisense_NA;associated_gene=OCPFDLNE_01764,OCPFDLNE_01765;libs=all;method=TSSpredator
CADEHJ010000001.1	ANNOgesic	TSS	1770572	1770572	.	+	.	Name=TSS:1770572_f;ID=CADEHJ010000001.1_tss938;type=Primary,Antisense;utr_length=Primary_23,Antisense_NA;associated_gene=OCPFDLNE_01765,OCPFDLNE_01764;libs=all;method=TSSpredator
CADEHJ010000001.1	ANNOgesic	TSS	1774876	1774876	.	-	.	Name=TSS:1774876_r;ID=CADEHJ010000001.1_tss939;type=Primary;utr_length=Primary_60;associated_gene=OCPFDLNE_01767;libs=all;method=TSSpredator
CADEHJ010000001.1	ANNOgesic	TSS	1780143	1780143	.	-	.	Name=TSS:1780143_r;ID=CADEHJ010000001.1_tss940;type=Primary;utr_length=Primary_25;associated_gene=OCPFDLNE_01774;libs=all;method=TSSpredator
CADEHJ010000001.1	ANNOgesic	TSS	1780582	1780582	.	-	.	Name=TSS:1780582_r;ID=CADEHJ010000001.1_tss941;type=Primary,Antisense;utr_length=Primary_19,Antisense_NA;associated_gene=OCPFDLNE_01775,OCPFDLNE_01776;libs=all;method=TSSpredator
CADEHJ010000001.1	ANNOgesic	TSS	1780638	1780638	.	+	.	Name=TSS:1780638_f;ID=CADEHJ010000001.1_tss942;type=Primary,Antisense;utr_length=Primary_32,Antisense_NA;associated_gene=OCPFDLNE_01776,OCPFDLNE_01775;libs=all;method=TSSpredator
CADEHJ010000001.1	ANNOgesic	TSS	1781227	1781227	.	-	.	Name=TSS:1781227_r;ID=CADEHJ010000001.1_tss943;type=Antisense;utr_length=Antisense_NA;associated_gene=OCPFDLNE_01776;libs=all;method=TSSpredator
CADEHJ010000001.1	ANNOgesic	TSS	1782280	1782280	.	+	.	Name=TSS:1782280_f;ID=CADEHJ010000001.1_tss944;type=Primary,Antisense;utr_length=Primary_23,Antisense_NA;associated_gene=OCPFDLNE_01778,OCPFDLNE_01777;libs=all;method=TSSpredator
CADEHJ010000001.1	ANNOgesic	TSS	1783259	1783259	.	-	.	Name=TSS:1783259_r;ID=CADEHJ010000001.1_tss945;type=Internal;utr_length=Internal_NA;associated_gene=OCPFDLNE_01779;libs=all;method=TSSpredator
CADEHJ010000001.1	ANNOgesic	TSS	1784263	1784263	.	-	.	Name=TSS:1784263_r;ID=CADEHJ010000001.1_tss946;type=Primary;utr_length=Primary_28;associated_gene=OCPFDLNE_01780;libs=all;method=TSSpredator
CADEHJ010000001.1	ANNOgesic	TSS	1784352	1784352	.	+	.	Name=TSS:1784352_f;ID=CADEHJ010000001.1_tss947;type=Primary;utr_length=Primary_71;associated_gene=OCPFDLNE_01781;libs=all;method=TSSpredator
CADEHJ010000001.1	ANNOgesic	TSS	1784978	1784978	.	+	.	Name=TSS:1784978_f;ID=CADEHJ010000001.1_tss948;type=Primary;utr_length=Primary_29;associated_gene=OCPFDLNE_01782;libs=all;method=TSSpredator
CADEHJ010000001.1	ANNOgesic	TSS	1787761	1787761	.	+	.	Name=TSS:1787761_f;ID=CADEHJ010000001.1_tss949;type=Secondary;utr_length=Secondary_59;associated_gene=OCPFDLNE_01784;libs=all;method=TSSpredator
CADEHJ010000001.1	ANNOgesic	TSS	1787771	1787771	.	+	.	Name=TSS:1787771_f;ID=CADEHJ010000001.1_tss950;type=Primary;utr_length=Primary_49;associated_gene=OCPFDLNE_01784;libs=all;method=TSSpredator
CADEHJ010000001.1	ANNOgesic	TSS	1790558	1790558	.	+	.	Name=TSS:1790558_f;ID=CADEHJ010000001.1_tss951;type=Primary;utr_length=Primary_34;associated_gene=OCPFDLNE_01788;libs=all;method=TSSpredator
CADEHJ010000001.1	ANNOgesic	TSS	1794364	1794364	.	-	.	Name=TSS:1794364_r;ID=CADEHJ010000001.1_tss952;type=Primary;utr_length=Primary_31;associated_gene=OCPFDLNE_01792;libs=all;method=TSSpredator
CADEHJ010000001.1	ANNOgesic	TSS	1797195	1797195	.	-	.	Name=TSS:1797195_r;ID=CADEHJ010000001.1_tss953;type=Primary;utr_length=Primary_27;associated_gene=OCPFDLNE_01793;libs=all;method=TSSpredator
CADEHJ010000001.1	ANNOgesic	TSS	1798651	1798651	.	-	.	Name=TSS:1798651_r;ID=CADEHJ010000001.1_tss954;type=Primary;utr_length=Primary_24;associated_gene=OCPFDLNE_01794;libs=all;method=TSSpredator
CADEHJ010000001.1	ANNOgesic	TSS	1800510	1800510	.	-	.	Name=TSS:1800510_r;ID=CADEHJ010000001.1_tss955;type=Primary;utr_length=Primary_33;associated_gene=OCPFDLNE_01797;libs=all;method=TSSpredator
CADEHJ010000001.1	ANNOgesic	TSS	1801605	1801605	.	-	.	Name=TSS:1801605_r;ID=CADEHJ010000001.1_tss956;type=Primary;utr_length=Primary_24;associated_gene=OCPFDLNE_01798;libs=all;method=TSSpredator
CADEHJ010000001.1	ANNOgesic	TSS	1802630	1802630	.	-	.	Name=TSS:1802630_r;ID=CADEHJ010000001.1_tss957;type=Primary;utr_length=Primary_24;associated_gene=OCPFDLNE_01799;libs=all;method=TSSpredator
CADEHJ010000001.1	ANNOgesic	TSS	1817779	1817779	.	-	.	Name=TSS:1817779_r;ID=CADEHJ010000001.1_tss958;type=Primary,Antisense;utr_length=Primary_104,Antisense_NA;associated_gene=OCPFDLNE_01806,OCPFDLNE_01807;libs=all;method=TSSpredator
CADEHJ010000001.1	ANNOgesic	TSS	1817831	1817831	.	+	.	Name=TSS:1817831_f;ID=CADEHJ010000001.1_tss959;type=Primary;utr_length=Primary_37;associated_gene=OCPFDLNE_01807;libs=all;method=TSSpredator
CADEHJ010000001.1	ANNOgesic	TSS	1820429	1820429	.	-	.	Name=TSS:1820429_r;ID=CADEHJ010000001.1_tss960;type=Primary;utr_length=Primary_50;associated_gene=OCPFDLNE_01809;libs=all;method=TSSpredator
CADEHJ010000001.1	ANNOgesic	TSS	1822893	1822893	.	-	.	Name=TSS:1822893_r;ID=CADEHJ010000001.1_tss961;type=Orphan;utr_length=Orphan_NA;associated_gene=orphan;libs=all;method=TSSpredator
CADEHJ010000001.1	ANNOgesic	TSS	1823144	1823144	.	-	.	Name=TSS:1823144_r;ID=CADEHJ010000001.1_tss962;type=Internal;utr_length=Internal_NA;associated_gene=OCPFDLNE_01813;libs=all;method=TSSpredator
CADEHJ010000001.1	ANNOgesic	TSS	1827935	1827935	.	-	.	Name=TSS:1827935_r;ID=CADEHJ010000001.1_tss963;type=Primary;utr_length=Primary_27;associated_gene=OCPFDLNE_01817;libs=all;method=TSSpredator
CADEHJ010000001.1	ANNOgesic	TSS	1830732	1830732	.	-	.	Name=TSS:1830732_r;ID=CADEHJ010000001.1_tss964;type=Primary;utr_length=Primary_25;associated_gene=OCPFDLNE_01819;libs=all;method=TSSpredator
CADEHJ010000001.1	ANNOgesic	TSS	1831372	1831372	.	-	.	Name=TSS:1831372_r;ID=CADEHJ010000001.1_tss965;type=Primary;utr_length=Primary_28;associated_gene=OCPFDLNE_01820;libs=all;method=TSSpredator
CADEHJ010000001.1	ANNOgesic	TSS	1831839	1831839	.	+	.	Name=TSS:1831839_f;ID=CADEHJ010000001.1_tss966;type=Internal;utr_length=Internal_NA;associated_gene=OCPFDLNE_01821;libs=all;method=TSSpredator
CADEHJ010000001.1	ANNOgesic	TSS	1832657	1832657	.	-	.	Name=TSS:1832657_r;ID=CADEHJ010000001.1_tss967;type=Primary;utr_length=Primary_31;associated_gene=OCPFDLNE_01822;libs=all;method=TSSpredator
CADEHJ010000001.1	ANNOgesic	TSS	1835127	1835127	.	-	.	Name=TSS:1835127_r;ID=CADEHJ010000001.1_tss968;type=Primary;utr_length=Primary_26;associated_gene=OCPFDLNE_01824;libs=all;method=TSSpredator
CADEHJ010000001.1	ANNOgesic	TSS	1836246	1836246	.	-	.	Name=TSS:1836246_r;ID=CADEHJ010000001.1_tss969;type=Primary;utr_length=Primary_65;associated_gene=OCPFDLNE_01825;libs=all;method=TSSpredator
CADEHJ010000001.1	ANNOgesic	TSS	1837623	1837623	.	-	.	Name=TSS:1837623_r;ID=CADEHJ010000001.1_tss970;type=Internal;utr_length=Internal_NA;associated_gene=OCPFDLNE_01826;libs=all;method=TSSpredator
CADEHJ010000001.1	ANNOgesic	TSS	1839611	1839611	.	-	.	Name=TSS:1839611_r;ID=CADEHJ010000001.1_tss971;type=Primary;utr_length=Primary_79;associated_gene=OCPFDLNE_01828;libs=all;method=TSSpredator
CADEHJ010000001.1	ANNOgesic	TSS	1845775	1845775	.	-	.	Name=TSS:1845775_r;ID=CADEHJ010000001.1_tss972;type=Primary;utr_length=Primary_28;associated_gene=OCPFDLNE_01832;libs=all;method=TSSpredator
CADEHJ010000001.1	ANNOgesic	TSS	1847953	1847953	.	-	.	Name=TSS:1847953_r;ID=CADEHJ010000001.1_tss973;type=Primary;utr_length=Primary_33;associated_gene=OCPFDLNE_01835;libs=all;method=TSSpredator
CADEHJ010000001.1	ANNOgesic	TSS	1848139	1848139	.	+	.	Name=TSS:1848139_f;ID=CADEHJ010000001.1_tss974;type=Antisense;utr_length=Antisense_NA;associated_gene=OCPFDLNE_01836;libs=all;method=TSSpredator
CADEHJ010000001.1	ANNOgesic	TSS	1860338	1860338	.	-	.	Name=TSS:1860338_r;ID=CADEHJ010000001.1_tss975;type=Primary,Internal;utr_length=Primary_30,Internal_NA;associated_gene=OCPFDLNE_01846,OCPFDLNE_01847;libs=all;method=TSSpredator
CADEHJ010000001.1	ANNOgesic	TSS	1860823	1860823	.	-	.	Name=TSS:1860823_r;ID=CADEHJ010000001.1_tss976;type=Primary;utr_length=Primary_34;associated_gene=OCPFDLNE_01847;libs=all;method=TSSpredator
[truncated: 664 more rows]

## Sheet: Same_TSS_positions
The list of EGD-e lifted TSS positions that were exactly the same as the TSS positions that we predicted in RO15
[truncated: 878 more rows]
