# Supplementary material for: RNA editing, RNA modifications, and transcriptional units in Listeria monocytogenes
Source: Research Square preprint supplement (doi:10.21203/rs.3.rs-1530110/v1), 2022-04-21
Supplement: Supplementary file 15 [file ae324dad7aedfbc317978379.xlsx]

## Sheet: R317_modifications
Table S11. Position of RNA modifications predicted using direct RNA-seq data in ScottA control at time point 24 h.
Position	RNA_mod_strand	feature	Protein ID	Locus Tag	Product
4655	+	CDS	EGJ23432.1	LMOSA_8270	S4 domain protein YaaA
4708	+	CDS	EGJ23432.1	LMOSA_8270	S4 domain protein YaaA
4877	+	CDS	EGJ23433.1	LMOSA_8280	DNA replication and repair protein recF
5014	+	CDS	EGJ23433.1	LMOSA_8280	DNA replication and repair protein recF
5038	+	CDS	EGJ23433.1	LMOSA_8280	DNA replication and repair protein recF
5059	+	CDS	EGJ23433.1	LMOSA_8280	DNA replication and repair protein recF
5108	+	CDS	EGJ23433.1	LMOSA_8280	DNA replication and repair protein recF
9444	+	CDS	EGJ23435.1	LMOSA_8300	DNA gyrase subunit A
9554	+	CDS	EGJ23435.1	LMOSA_8300	DNA gyrase subunit A
9616	+	CDS	EGJ23435.1	LMOSA_8300	DNA gyrase subunit A
9691	+	CDS	EGJ23435.1	LMOSA_8300	DNA gyrase subunit A
9722	+	CDS	EGJ23435.1	LMOSA_8300	DNA gyrase subunit A
9783	+	CDS	EGJ23435.1	LMOSA_8300	DNA gyrase subunit A
9961	+	CDS	EGJ23435.1	LMOSA_8300	DNA gyrase subunit A
10033	+	CDS	EGJ23435.1	LMOSA_8300	DNA gyrase subunit A
10153	+	CDS	EGJ23435.1	LMOSA_8300	DNA gyrase subunit A
10186	+	CDS	EGJ23435.1	LMOSA_8300	DNA gyrase subunit A
10368	+	CDS	EGJ23435.1	LMOSA_8300	DNA gyrase subunit A
10452	+	CDS	EGJ23435.1	LMOSA_8300	DNA gyrase subunit A
10461	+	CDS	EGJ23435.1	LMOSA_8300	DNA gyrase subunit A
10476	+	CDS	EGJ23435.1	LMOSA_8300	DNA gyrase subunit A
10492	+	CDS	EGJ23435.1	LMOSA_8300	DNA gyrase subunit A
10557	+	CDS	EGJ23435.1	LMOSA_8300	DNA gyrase subunit A
10565	+	CDS	EGJ23435.1	LMOSA_8300	DNA gyrase subunit A
10589	+	CDS	EGJ23435.1	LMOSA_8300	DNA gyrase subunit A
10605	+	intergenic region
18198	+	intergenic region
18393	+	CDS	EGJ23446.1	LMOSA_8410	Quinol oxidase subunit 2
18466	+	CDS	EGJ23446.1	LMOSA_8410	Quinol oxidase subunit 2
18536	+	CDS	EGJ23446.1	LMOSA_8410	Quinol oxidase subunit 2
18642	+	CDS	EGJ23446.1	LMOSA_8410	Quinol oxidase subunit 2
21950	+	CDS	EGJ23448.1	LMOSA_8430	Quinol oxidase subunit 3
22106	+	CDS	EGJ23449.1	LMOSA_8440	Quinol oxidase subunit 4
22285	+	CDS	EGJ23449.1	LMOSA_8440	Quinol oxidase subunit 4
22329	+	CDS	EGJ23449.1	LMOSA_8440	Quinol oxidase subunit 4
25504	-	CDS	EGJ23452.1	LMOSA_8470	Bacterial SH3 domain family
25626	-	CDS	EGJ23452.1	LMOSA_8470	Bacterial SH3 domain family
25861	-	CDS	EGJ23452.1	LMOSA_8470	Bacterial SH3 domain family
25945	-	CDS	EGJ23452.1	LMOSA_8470	Bacterial SH3 domain family
38427	+	CDS	EGJ23470.1	LMOSA_8630	hypothetical protein
38438	+	CDS	EGJ23470.1	LMOSA_8630	hypothetical protein
38474	+	CDS	EGJ23470.1	LMOSA_8630	hypothetical protein
38531	+	CDS	EGJ23470.1	LMOSA_8630	hypothetical protein
38596	+	CDS	EGJ23470.1	LMOSA_8630	hypothetical protein
38694	+	CDS	EGJ23470.1	LMOSA_8630	hypothetical protein
38716	+	CDS	EGJ23470.1	LMOSA_8630	hypothetical protein
38739	+	intergenic region
54357	+	CDS	EGJ23484.1	LMOSA_8770	Arginine deiminase
54383	+	CDS	EGJ23484.1	LMOSA_8770	Arginine deiminase
54485	+	CDS	EGJ23484.1	LMOSA_8770	Arginine deiminase
54558	+	CDS	EGJ23484.1	LMOSA_8770	Arginine deiminase
54601	+	CDS	EGJ23484.1	LMOSA_8770	Arginine deiminase
55778	+	CDS	EGJ23485.1	LMOSA_8780	30S ribosomal protein S6
56122	+	CDS	EGJ23486.1	LMOSA_8790	Single-stranded DNA-binding protein
56251	+	CDS	EGJ23486.1	LMOSA_8790	Single-stranded DNA-binding protein
56311	+	CDS	EGJ23486.1	LMOSA_8790	Single-stranded DNA-binding protein
56330	+	CDS	EGJ23486.1	LMOSA_8790	Single-stranded DNA-binding protein
56504	+	CDS	EGJ23486.1	LMOSA_8790	Single-stranded DNA-binding protein
56548	+	CDS	EGJ23486.1	LMOSA_8790	Single-stranded DNA-binding protein
57111	+	CDS	EGJ23488.1	LMOSA_8810	Lipoprotein
57164	+	CDS	EGJ23488.1	LMOSA_8810	Lipoprotein
57314	+	CDS	EGJ23488.1	LMOSA_8810	Lipoprotein
57341	+	CDS	EGJ23488.1	LMOSA_8810	Lipoprotein
57367	+	CDS	EGJ23488.1	LMOSA_8810	Lipoprotein
57379	+	CDS	EGJ23488.1	LMOSA_8810	Lipoprotein
57440	+	CDS	EGJ23488.1	LMOSA_8810	Lipoprotein
57467	+	CDS	EGJ23488.1	LMOSA_8810	Lipoprotein
57482	+	CDS	EGJ23488.1	LMOSA_8810	Lipoprotein
57507	+	CDS	EGJ23488.1	LMOSA_8810	Lipoprotein
57539	+	CDS	EGJ23488.1	LMOSA_8810	Lipoprotein
57597	+	CDS	EGJ23488.1	LMOSA_8810	Lipoprotein
57621	+	CDS	EGJ23488.1	LMOSA_8810	Lipoprotein
57646	+	CDS	EGJ23488.1	LMOSA_8810	Lipoprotein
57706	+	intergenic region
57723	+	intergenic region
57960	+	CDS	EGJ23489.1	LMOSA_8820	Putative AgrB-like protein
57975	+	CDS	EGJ23489.1	LMOSA_8820	Putative AgrB-like protein
57991	+	CDS	EGJ23489.1	LMOSA_8820	Putative AgrB-like protein
58006	+	CDS	EGJ23489.1	LMOSA_8820	Putative AgrB-like protein
58019	+	CDS	EGJ23489.1	LMOSA_8820	Putative AgrB-like protein
58036	+	CDS	EGJ23489.1	LMOSA_8820	Putative AgrB-like protein
58057	+	CDS	EGJ23489.1	LMOSA_8820	Putative AgrB-like protein
58126	+	CDS	EGJ23489.1	LMOSA_8820	Putative AgrB-like protein
58241	+	CDS	EGJ23489.1	LMOSA_8820	Putative AgrB-like protein
58291	+	CDS	EGJ23489.1	LMOSA_8820	Putative AgrB-like protein
58302	+	CDS	EGJ23489.1	LMOSA_8820	Putative AgrB-like protein
58350	+	CDS	EGJ23489.1	LMOSA_8820	Putative AgrB-like protein
58361	+	CDS	EGJ23489.1	LMOSA_8820	Putative AgrB-like protein
58377	+	CDS	EGJ23489.1	LMOSA_8820	Putative AgrB-like protein
58414	+	CDS	EGJ23489.1	LMOSA_8820	Putative AgrB-like protein
58468	+	CDS	EGJ23489.1	LMOSA_8820	Putative AgrB-like protein
58505	+	CDS	EGJ23489.1	LMOSA_8820	Putative AgrB-like protein
58607	+	intergenic region
58618	+	intergenic region
58642	+	intergenic region
58673	+	intergenic region
58760	+	intergenic region
58786	+	intergenic region
58798	+	intergenic region
58829	+	CDS	EGJ23490.1	LMOSA_8830	Accessory gene regulator protein C
58870	+	CDS	EGJ23490.1	LMOSA_8830	Accessory gene regulator protein C
58886	+	CDS	EGJ23490.1	LMOSA_8830	Accessory gene regulator protein C
58895	+	CDS	EGJ23490.1	LMOSA_8830	Accessory gene regulator protein C
58931	+	CDS	EGJ23490.1	LMOSA_8830	Accessory gene regulator protein C
58970	+	CDS	EGJ23490.1	LMOSA_8830	Accessory gene regulator protein C
58997	+	CDS	EGJ23490.1	LMOSA_8830	Accessory gene regulator protein C
59053	+	CDS	EGJ23490.1	LMOSA_8830	Accessory gene regulator protein C
59107	+	CDS	EGJ23490.1	LMOSA_8830	Accessory gene regulator protein C
59127	+	CDS	EGJ23490.1	LMOSA_8830	Accessory gene regulator protein C
59223	+	CDS	EGJ23490.1	LMOSA_8830	Accessory gene regulator protein C
59383	+	CDS	EGJ23490.1	LMOSA_8830	Accessory gene regulator protein C
59404	+	CDS	EGJ23490.1	LMOSA_8830	Accessory gene regulator protein C
59447	+	CDS	EGJ23490.1	LMOSA_8830	Accessory gene regulator protein C
59483	+	CDS	EGJ23490.1	LMOSA_8830	Accessory gene regulator protein C
59539	+	CDS	EGJ23490.1	LMOSA_8830	Accessory gene regulator protein C
59602	+	CDS	EGJ23490.1	LMOSA_8830	Accessory gene regulator protein C
59664	+	CDS	EGJ23490.1	LMOSA_8830	Accessory gene regulator protein C
59824	+	CDS	EGJ23490.1	LMOSA_8830	Accessory gene regulator protein C
59835	+	CDS	EGJ23490.1	LMOSA_8830	Accessory gene regulator protein C
59895	+	CDS	EGJ23490.1	LMOSA_8830	Accessory gene regulator protein C
59942	+	CDS	EGJ23490.1	LMOSA_8830	Accessory gene regulator protein C
59951	+	CDS	EGJ23490.1	LMOSA_8830	Accessory gene regulator protein C
59970	+	CDS	EGJ23490.1	LMOSA_8830	Accessory gene regulator protein C
59992	+	CDS	EGJ23490.1	LMOSA_8830	Accessory gene regulator protein C
60065	+	CDS	EGJ23490.1	LMOSA_8830	Accessory gene regulator protein C
60109	+	CDS	EGJ23490.1	LMOSA_8830	Accessory gene regulator protein C
60120	+	intergenic region
60169	+	CDS	EGJ23491.1	LMOSA_8840	Accessory gene regulator protein A
60225	+	CDS	EGJ23491.1	LMOSA_8840	Accessory gene regulator protein A
60270	+	CDS	EGJ23491.1	LMOSA_8840	Accessory gene regulator protein A
60356	+	CDS	EGJ23491.1	LMOSA_8840	Accessory gene regulator protein A
60409	+	CDS	EGJ23491.1	LMOSA_8840	Accessory gene regulator protein A
60507	+	CDS	EGJ23491.1	LMOSA_8840	Accessory gene regulator protein A
60549	+	CDS	EGJ23491.1	LMOSA_8840	Accessory gene regulator protein A
60566	+	CDS	EGJ23491.1	LMOSA_8840	Accessory gene regulator protein A
60575	+	CDS	EGJ23491.1	LMOSA_8840	Accessory gene regulator protein A
60602	+	CDS	EGJ23491.1	LMOSA_8840	Accessory gene regulator protein A
60673	+	CDS	EGJ23491.1	LMOSA_8840	Accessory gene regulator protein A
60716	+	CDS	EGJ23491.1	LMOSA_8840	Accessory gene regulator protein A
60766	+	CDS	EGJ23491.1	LMOSA_8840	Accessory gene regulator protein A
60774	+	CDS	EGJ23491.1	LMOSA_8840	Accessory gene regulator protein A
60795	+	CDS	EGJ23491.1	LMOSA_8840	Accessory gene regulator protein A
60849	+	CDS	EGJ23491.1	LMOSA_8840	Accessory gene regulator protein A
64231	+	CDS	EGJ23494.1	LMOSA_8870	Replicative DNA helicase
64531	+	CDS	EGJ23494.1	LMOSA_8870	Replicative DNA helicase
64593	+	CDS	EGJ23494.1	LMOSA_8870	Replicative DNA helicase
64779	+	CDS	EGJ23494.1	LMOSA_8870	Replicative DNA helicase
64793	+	CDS	EGJ23494.1	LMOSA_8870	Replicative DNA helicase
64817	+	CDS	EGJ23494.1	LMOSA_8870	Replicative DNA helicase
64849	+	intergenic region
87017	+	CDS	EGJ23521.1	LMOSA_9140	hypothetical protein
87058	+	CDS	EGJ23521.1	LMOSA_9140	hypothetical protein
87085	+	CDS	EGJ23521.1	LMOSA_9140	hypothetical protein
87204	+	CDS	EGJ23521.1	LMOSA_9140	hypothetical protein
87229	+	CDS	EGJ23521.1	LMOSA_9140	hypothetical protein
87249	+	CDS	EGJ23521.1	LMOSA_9140	hypothetical protein
87288	+	CDS	EGJ23521.1	LMOSA_9140	hypothetical protein
87353	+	CDS	EGJ23521.1	LMOSA_9140	hypothetical protein
87385	+	CDS	EGJ23521.1	LMOSA_9140	hypothetical protein
87426	+	CDS	EGJ23521.1	LMOSA_9140	hypothetical protein
87513	+	CDS	EGJ23521.1	LMOSA_9140	hypothetical protein
87575	+	CDS	EGJ23521.1	LMOSA_9140	hypothetical protein
87625	+	CDS	EGJ23521.1	LMOSA_9140	hypothetical protein
87633	+	CDS	EGJ23521.1	LMOSA_9140	hypothetical protein
87670	+	CDS	EGJ23521.1	LMOSA_9140	hypothetical protein
87703	+	CDS	EGJ23521.1	LMOSA_9140	hypothetical protein
87751	+	CDS	EGJ23521.1	LMOSA_9140	hypothetical protein
87778	+	CDS	EGJ23521.1	LMOSA_9140	hypothetical protein
87842	+	CDS	EGJ23521.1	LMOSA_9140	hypothetical protein
87875	+	CDS	EGJ23521.1	LMOSA_9140	hypothetical protein
87905	+	CDS	EGJ23521.1	LMOSA_9140	hypothetical protein
87925	+	intergenic region
87934	+	intergenic region
89916	-	CDS	EGJ23523.1	MOSA_9160
89970	-	CDS	EGJ23523.1	MOSA_9160
90005	-	CDS	EGJ23523.1	MOSA_9160
90036	-	CDS	EGJ23523.1	MOSA_9160
90056	-	CDS	EGJ23523.1	MOSA_9160
90072	-	CDS	EGJ23523.1	MOSA_9160
90180	-	CDS	EGJ23523.1	MOSA_9160
90190	-	intergenic region
90245	-	CDS	EGJ23524.1	LMOSA_9170	Phage protein
90384	-	CDS	EGJ23524.1	LMOSA_9170	Phage protein
90523	-	CDS	EGJ23524.1	LMOSA_9170	Phage protein
90557	-	CDS	EGJ23524.1	LMOSA_9170	Phage protein
90690	-	CDS	EGJ23524.1	LMOSA_9170	Phage protein
90793	-	CDS	EGJ23524.1	LMOSA_9170	Phage protein
90920	-	CDS	EGJ23524.1	LMOSA_9170	Phage protein
91055	-	CDS	EGJ23525.1	MOSA_9180
91063	-	CDS	EGJ23525.1	MOSA_9180
91127	-	CDS	EGJ23525.1	MOSA_9180
91138	-	CDS	EGJ23525.1	MOSA_9180
91171	-	intergenic region
91418	-	CDS	EGJ23526.1	LMOSA_9190	Gp35
91447	-	CDS	EGJ23526.1	LMOSA_9190	Gp35
91497	-	CDS	EGJ23526.1	LMOSA_9190	Gp35
91529	-	CDS	EGJ23526.1	LMOSA_9190	Gp35
91706	-	CDS	EGJ23527.1	LMOSA_9200	Cro/CI family transcriptional regulator
91765	-	CDS	EGJ23527.1	LMOSA_9200	Cro/CI family transcriptional regulator
91790	-	CDS	EGJ23527.1	LMOSA_9200	Cro/CI family transcriptional regulator
91857	-	CDS	EGJ23527.1	LMOSA_9200	Cro/CI family transcriptional regulator
92668	-	CDS	EGJ23530.1	LMOSA_9221	phage protein
92709	-	CDS	EGJ23530.1	LMOSA_9221	phage protein
92720	-	CDS	EGJ23530.1	LMOSA_9221	phage protein
92739	-	CDS	EGJ23530.1	LMOSA_9221	phage protein
130049	+	intergenic region
130104	+	intergenic region
130217	+	intergenic region
182923	+	CDS	EGJ23640.1	LMOSA_10300	EAL domain protein
182964	+	CDS	EGJ23640.1	LMOSA_10300	EAL domain protein
183058	+	CDS	EGJ23640.1	LMOSA_10300	EAL domain protein
183123	+	CDS	EGJ23640.1	LMOSA_10300	EAL domain protein
183330	+	CDS	EGJ23640.1	LMOSA_10300	EAL domain protein
183338	+	CDS	EGJ23640.1	LMOSA_10300	EAL domain protein
183363	+	CDS	EGJ23640.1	LMOSA_10300	EAL domain protein
183390	+	CDS	EGJ23640.1	LMOSA_10300	EAL domain protein
183446	+	CDS	EGJ23640.1	LMOSA_10300	EAL domain protein
183528	+	CDS	EGJ23640.1	LMOSA_10300	EAL domain protein
183612	+	CDS	EGJ23640.1	LMOSA_10300	EAL domain protein
183649	+	intergenic region
185394	+	CDS	EGJ23642.1	LMOSA_10320	hypothetical protein
185424	+	CDS	EGJ23642.1	LMOSA_10320	hypothetical protein
185534	+	CDS	EGJ23642.1	LMOSA_10320	hypothetical protein
185548	+	CDS	EGJ23642.1	LMOSA_10320	hypothetical protein
185627	+	intergenic region
185669	+	CDS	EGJ23643.1	LMOSA_10330	Acetyltransferase%2C GNAT family
185678	+	CDS	EGJ23643.1	LMOSA_10330	Acetyltransferase%2C GNAT family
185698	+	CDS	EGJ23643.1	LMOSA_10330	Acetyltransferase%2C GNAT family
185747	+	CDS	EGJ23643.1	LMOSA_10330	Acetyltransferase%2C GNAT family
185757	+	CDS	EGJ23643.1	LMOSA_10330	Acetyltransferase%2C GNAT family
185809	+	CDS	EGJ23643.1	LMOSA_10330	Acetyltransferase%2C GNAT family
185874	+	CDS	EGJ23643.1	LMOSA_10330	Acetyltransferase%2C GNAT family
185891	+	CDS	EGJ23643.1	LMOSA_10330	Acetyltransferase%2C GNAT family
185909	+	CDS	EGJ23643.1	LMOSA_10330	Acetyltransferase%2C GNAT family
185939	+	intergenic region
208891	+	CDS	EGJ23669.1	LMOSA_10580	DNA polymerase III delta subunit
208936	+	CDS	EGJ23669.1	LMOSA_10580	DNA polymerase III delta subunit
209075	+	CDS	EGJ23669.1	LMOSA_10580	DNA polymerase III delta subunit
209116	+	CDS	EGJ23669.1	LMOSA_10580	DNA polymerase III delta subunit
209137	+	CDS	EGJ23669.1	LMOSA_10580	DNA polymerase III delta subunit
209173	+	CDS	EGJ23669.1	LMOSA_10580	DNA polymerase III delta subunit
209233	+	CDS	EGJ23669.1	LMOSA_10580	DNA polymerase III delta subunit
209244	+	CDS	EGJ23669.1	LMOSA_10580	DNA polymerase III delta subunit
209253	+	CDS	EGJ23669.1	LMOSA_10580	DNA polymerase III delta subunit
209262	+	CDS	EGJ23669.1	LMOSA_10580	DNA polymerase III delta subunit
209276	+	CDS	EGJ23669.1	LMOSA_10580	DNA polymerase III delta subunit
209284	+	CDS	EGJ23669.1	LMOSA_10580	DNA polymerase III delta subunit
209421	+	CDS	EGJ23669.1	LMOSA_10580	DNA polymerase III delta subunit
209482	+	CDS	EGJ23669.1	LMOSA_10580	DNA polymerase III delta subunit
209596	+	CDS	EGJ23669.1	LMOSA_10580	DNA polymerase III delta subunit
210827	+	CDS	EGJ23671.1	LMOSA_10600	Initiation-control protein yabA
210868	+	CDS	EGJ23671.1	LMOSA_10600	Initiation-control protein yabA
210883	+	CDS	EGJ23671.1	LMOSA_10600	Initiation-control protein yabA
210982	+	CDS	EGJ23671.1	LMOSA_10600	Initiation-control protein yabA
211083	+	CDS	EGJ23671.1	LMOSA_10600	Initiation-control protein yabA
213767	+	CDS	EGJ23676.1	LMOSA_10650	hypothetical protein
213935	+	CDS	EGJ23676.1	LMOSA_10650	hypothetical protein
214050	+	CDS	EGJ23676.1	LMOSA_10650	hypothetical protein
214085	+	CDS	EGJ23676.1	LMOSA_10650	hypothetical protein
214435	+	CDS	EGJ23677.1	LMOSA_10660	hypothetical protein
214483	+	CDS	EGJ23677.1	LMOSA_10660	hypothetical protein
214512	+	CDS	EGJ23677.1	LMOSA_10660	hypothetical protein
214574	+	CDS	EGJ23677.1	LMOSA_10660	hypothetical protein
214613	+	CDS	EGJ23677.1	LMOSA_10660	hypothetical protein
214632	+	CDS	EGJ23677.1	LMOSA_10660	hypothetical protein
214655	+	CDS	EGJ23677.1	LMOSA_10660	hypothetical protein
214702	+	CDS	EGJ23677.1	LMOSA_10660	hypothetical protein
214838	+	CDS	EGJ23677.1	LMOSA_10660	hypothetical protein
214879	+	CDS	EGJ23677.1	LMOSA_10660	hypothetical protein
214900	+	CDS	EGJ23677.1	LMOSA_10660	hypothetical protein
214917	+	CDS	EGJ23677.1	LMOSA_10660	hypothetical protein
214928	+	CDS	EGJ23677.1	LMOSA_10660	hypothetical protein
214953	+	CDS	EGJ23677.1	LMOSA_10660	hypothetical protein
215038	+	CDS	EGJ23677.1	LMOSA_10660	hypothetical protein
215065	+	CDS	EGJ23677.1	LMOSA_10660	hypothetical protein
215103	+	CDS	EGJ23677.1	LMOSA_10660	hypothetical protein
215119	+	CDS	EGJ23677.1	LMOSA_10660	hypothetical protein
215169	+	CDS	EGJ23677.1	LMOSA_10660	hypothetical protein
215197	+	CDS	EGJ23677.1	LMOSA_10660	hypothetical protein
215313	+	CDS	EGJ23677.1	LMOSA_10660	hypothetical protein
215346	+	CDS	EGJ23677.1	LMOSA_10660	hypothetical protein
215378	+	CDS	EGJ23677.1	LMOSA_10660	hypothetical protein
215400	+	CDS	EGJ23677.1	LMOSA_10660	hypothetical protein
215428	+	CDS	EGJ23677.1	LMOSA_10660	hypothetical protein
215506	+	CDS	EGJ23677.1	LMOSA_10660	hypothetical protein
215519	+	CDS	EGJ23677.1	LMOSA_10660	hypothetical protein
215639	+	CDS	EGJ23677.1	LMOSA_10660	hypothetical protein
215681	+	intergenic region
215718	+	intergenic region
236129	+	intergenic region
236158	+	CDS	EGJ23693.1	LMOSA_10820	Protein veg
236166	+	CDS	EGJ23693.1	LMOSA_10820	Protein veg
236224	+	CDS	EGJ23693.1	LMOSA_10820	Protein veg
236288	+	CDS	EGJ23693.1	LMOSA_10820	Protein veg
236328	+	CDS	EGJ23693.1	LMOSA_10820	Protein veg
236343	+	CDS	EGJ23693.1	LMOSA_10820	Protein veg
236365	+	CDS	EGJ23693.1	LMOSA_10820	Protein veg
236394	+	intergenic region
238489	+	CDS	EGJ23696.1	LMOSA_10850	Pur operon repressor PurR
242360	+	intergenic region
242532	+	intergenic region
242554	+	intergenic region
242586	+	intergenic region
242613	+	intergenic region
242652	+	CDS	EGJ23700.1	LMOSA_10890	Stage V sporulation protein G
242670	+	CDS	EGJ23700.1	LMOSA_10890	Stage V sporulation protein G
242716	+	CDS	EGJ23700.1	LMOSA_10890	Stage V sporulation protein G
242777	+	CDS	EGJ23700.1	LMOSA_10890	Stage V sporulation protein G
242789	+	CDS	EGJ23700.1	LMOSA_10890	Stage V sporulation protein G
242829	+	CDS	EGJ23700.1	LMOSA_10890	Stage V sporulation protein G
242852	+	CDS	EGJ23700.1	LMOSA_10890	Stage V sporulation protein G
242875	+	CDS	EGJ23700.1	LMOSA_10890	Stage V sporulation protein G
242883	+	CDS	EGJ23700.1	LMOSA_10890	Stage V sporulation protein G
242895	+	CDS	EGJ23700.1	LMOSA_10890	Stage V sporulation protein G
242903	+	CDS	EGJ23700.1	LMOSA_10890	Stage V sporulation protein G
242917	+	CDS	EGJ23700.1	LMOSA_10890	Stage V sporulation protein G
242985	+	intergenic region
242995	+	intergenic region
243016	+	intergenic region
243030	+	intergenic region
243043	+	intergenic region
243071	+	CDS	EGJ23701.1	LMOSA_10900	Putative septation protein spoVG 2
243079	+	CDS	EGJ23701.1	LMOSA_10900	Putative septation protein spoVG 2
243136	+	CDS	EGJ23701.1	LMOSA_10900	Putative septation protein spoVG 2
243144	+	CDS	EGJ23701.1	LMOSA_10900	Putative septation protein spoVG 2
243282	+	CDS	EGJ23701.1	LMOSA_10900	Putative septation protein spoVG 2
243331	+	CDS	EGJ23701.1	LMOSA_10900	Putative septation protein spoVG 2
243397	+	intergenic region
246306	-	CDS	EGJ23704.1	LMOSA_10930	Listeriolysin regulatory protein
246404	-	CDS	EGJ23704.1	LMOSA_10930	Listeriolysin regulatory protein
246637	-	CDS	EGJ23704.1	LMOSA_10930	Listeriolysin regulatory protein
246665	-	CDS	EGJ23704.1	LMOSA_10930	Listeriolysin regulatory protein
246704	-	CDS	EGJ23704.1	LMOSA_10930	Listeriolysin regulatory protein
246720	-	CDS	EGJ23704.1	LMOSA_10930	Listeriolysin regulatory protein
246844	-	CDS	EGJ23704.1	LMOSA_10930	Listeriolysin regulatory protein
246897	-	intergenic region
248328	+	intergenic region
248344	+	intergenic region
248362	+	CDS	EGJ23706.1	LMOSA_10950	Listeriolysin O
248403	+	CDS	EGJ23706.1	LMOSA_10950	Listeriolysin O
248423	+	CDS	EGJ23706.1	LMOSA_10950	Listeriolysin O
248500	+	CDS	EGJ23706.1	LMOSA_10950	Listeriolysin O
248538	+	CDS	EGJ23706.1	LMOSA_10950	Listeriolysin O
248602	+	CDS	EGJ23706.1	LMOSA_10950	Listeriolysin O
248617	+	CDS	EGJ23706.1	LMOSA_10950	Listeriolysin O
248627	+	CDS	EGJ23706.1	LMOSA_10950	Listeriolysin O
248642	+	CDS	EGJ23706.1	LMOSA_10950	Listeriolysin O
248667	+	CDS	EGJ23706.1	LMOSA_10950	Listeriolysin O
248675	+	CDS	EGJ23706.1	LMOSA_10950	Listeriolysin O
248702	+	CDS	EGJ23706.1	LMOSA_10950	Listeriolysin O
248788	+	CDS	EGJ23706.1	LMOSA_10950	Listeriolysin O
248828	+	CDS	EGJ23706.1	LMOSA_10950	Listeriolysin O
248903	+	CDS	EGJ23706.1	LMOSA_10950	Listeriolysin O
248961	+	CDS	EGJ23706.1	LMOSA_10950	Listeriolysin O
248980	+	CDS	EGJ23706.1	LMOSA_10950	Listeriolysin O
249020	+	CDS	EGJ23706.1	LMOSA_10950	Listeriolysin O
249028	+	CDS	EGJ23706.1	LMOSA_10950	Listeriolysin O
249097	+	CDS	EGJ23706.1	LMOSA_10950	Listeriolysin O
249204	+	CDS	EGJ23706.1	LMOSA_10950	Listeriolysin O
249220	+	CDS	EGJ23706.1	LMOSA_10950	Listeriolysin O
249252	+	CDS	EGJ23706.1	LMOSA_10950	Listeriolysin O
249302	+	CDS	EGJ23706.1	LMOSA_10950	Listeriolysin O
249320	+	CDS	EGJ23706.1	LMOSA_10950	Listeriolysin O
249352	+	CDS	EGJ23706.1	LMOSA_10950	Listeriolysin O
249423	+	CDS	EGJ23706.1	LMOSA_10950	Listeriolysin O
249471	+	CDS	EGJ23706.1	LMOSA_10950	Listeriolysin O
249543	+	CDS	EGJ23706.1	LMOSA_10950	Listeriolysin O
249572	+	CDS	EGJ23706.1	LMOSA_10950	Listeriolysin O
249669	+	CDS	EGJ23706.1	LMOSA_10950	Listeriolysin O
249686	+	CDS	EGJ23706.1	LMOSA_10950	Listeriolysin O
249721	+	CDS	EGJ23706.1	LMOSA_10950	Listeriolysin O
249735	+	CDS	EGJ23706.1	LMOSA_10950	Listeriolysin O
249774	+	CDS	EGJ23706.1	LMOSA_10950	Listeriolysin O
249823	+	CDS	EGJ23706.1	LMOSA_10950	Listeriolysin O
249850	+	CDS	EGJ23706.1	LMOSA_10950	Listeriolysin O
249923	+	CDS	EGJ23706.1	LMOSA_10950	Listeriolysin O
249932	+	CDS	EGJ23706.1	LMOSA_10950	Listeriolysin O
249962	+	intergenic region
250007	+	intergenic region
250049	+	intergenic region
250058	+	intergenic region
255900	-	CDS	EGJ23712.1	LMOSA_11010	hypothetical protein
256920	-	intergenic region
256946	-	CDS	EGJ23714.1	LMOSA_11030	L-lactate dehydrogenase 1
256954	-	CDS	EGJ23714.1	LMOSA_11030	L-lactate dehydrogenase 1
256965	-	CDS	EGJ23714.1	LMOSA_11030	L-lactate dehydrogenase 1
257001	-	CDS	EGJ23714.1	LMOSA_11030	L-lactate dehydrogenase 1
257101	-	CDS	EGJ23714.1	LMOSA_11030	L-lactate dehydrogenase 1
257225	-	CDS	EGJ23714.1	LMOSA_11030	L-lactate dehydrogenase 1
257236	-	CDS	EGJ23714.1	LMOSA_11030	L-lactate dehydrogenase 1
257271	-	CDS	EGJ23714.1	LMOSA_11030	L-lactate dehydrogenase 1
257316	-	CDS	EGJ23714.1	LMOSA_11030	L-lactate dehydrogenase 1
257369	-	CDS	EGJ23714.1	LMOSA_11030	L-lactate dehydrogenase 1
257383	-	CDS	EGJ23714.1	LMOSA_11030	L-lactate dehydrogenase 1
257502	-	CDS	EGJ23714.1	LMOSA_11030	L-lactate dehydrogenase 1
257555	-	CDS	EGJ23714.1	LMOSA_11030	L-lactate dehydrogenase 1
257571	-	CDS	EGJ23714.1	LMOSA_11030	L-lactate dehydrogenase 1
257601	-	CDS	EGJ23714.1	LMOSA_11030	L-lactate dehydrogenase 1
257649	-	CDS	EGJ23714.1	LMOSA_11030	L-lactate dehydrogenase 1
257659	-	CDS	EGJ23714.1	LMOSA_11030	L-lactate dehydrogenase 1
257731	-	CDS	EGJ23714.1	LMOSA_11030	L-lactate dehydrogenase 1
257758	-	CDS	EGJ23714.1	LMOSA_11030	L-lactate dehydrogenase 1
257869	-	CDS	EGJ23714.1	LMOSA_11030	L-lactate dehydrogenase 1
257902	-	intergenic region
257950	-	intergenic region
258007	-	intergenic region
258152	+	intergenic region
258178	+	CDS	EGJ23715.1	LMOSA_11040	50S ribosomal protein L25
258216	+	CDS	EGJ23715.1	LMOSA_11040	50S ribosomal protein L25
258240	+	CDS	EGJ23715.1	LMOSA_11040	50S ribosomal protein L25
258324	+	CDS	EGJ23715.1	LMOSA_11040	50S ribosomal protein L25
258349	+	CDS	EGJ23715.1	LMOSA_11040	50S ribosomal protein L25
258362	+	CDS	EGJ23715.1	LMOSA_11040	50S ribosomal protein L25
258431	+	CDS	EGJ23715.1	LMOSA_11040	50S ribosomal protein L25
258444	+	CDS	EGJ23715.1	LMOSA_11040	50S ribosomal protein L25
258460	+	CDS	EGJ23715.1	LMOSA_11040	50S ribosomal protein L25
258473	+	CDS	EGJ23715.1	LMOSA_11040	50S ribosomal protein L25
258495	+	CDS	EGJ23715.1	LMOSA_11040	50S ribosomal protein L25
258505	+	CDS	EGJ23715.1	LMOSA_11040	50S ribosomal protein L25
258518	+	CDS	EGJ23715.1	LMOSA_11040	50S ribosomal protein L25
258545	+	CDS	EGJ23715.1	LMOSA_11040	50S ribosomal protein L25
258619	+	CDS	EGJ23715.1	LMOSA_11040	50S ribosomal protein L25
258677	+	CDS	EGJ23715.1	LMOSA_11040	50S ribosomal protein L25
258716	+	CDS	EGJ23715.1	LMOSA_11040	50S ribosomal protein L25
258733	+	CDS	EGJ23715.1	LMOSA_11040	50S ribosomal protein L25
258751	+	CDS	EGJ23715.1	LMOSA_11040	50S ribosomal protein L25
258762	+	CDS	EGJ23715.1	LMOSA_11040	50S ribosomal protein L25
258770	+	CDS	EGJ23715.1	LMOSA_11040	50S ribosomal protein L25
258788	+	intergenic region
258798	+	intergenic region
258830	+	intergenic region
265918	+	intergenic region
266093	+	CDS	EGJ23721.1	LMOSA_11100	Cell division protein DivIC
266136	+	CDS	EGJ23721.1	LMOSA_11100	Cell division protein DivIC
266150	+	CDS	EGJ23721.1	LMOSA_11100	Cell division protein DivIC
266175	+	CDS	EGJ23721.1	LMOSA_11100	Cell division protein DivIC
266220	+	CDS	EGJ23721.1	LMOSA_11100	Cell division protein DivIC
266315	+	CDS	EGJ23721.1	LMOSA_11100	Cell division protein DivIC
266390	+	intergenic region
266480	+	CDS	EGJ23722.1	LMOSA_11110	S1 RNA binding domain protein
266608	+	CDS	EGJ23722.1	LMOSA_11110	S1 RNA binding domain protein
266629	+	CDS	EGJ23722.1	LMOSA_11110	S1 RNA binding domain protein
266645	+	CDS	EGJ23722.1	LMOSA_11110	S1 RNA binding domain protein
266662	+	CDS	EGJ23722.1	LMOSA_11110	S1 RNA binding domain protein
266699	+	CDS	EGJ23722.1	LMOSA_11110	S1 RNA binding domain protein
266722	+	CDS	EGJ23722.1	LMOSA_11110	S1 RNA binding domain protein
266792	+	CDS	EGJ23722.1	LMOSA_11110	S1 RNA binding domain protein
266811	+	CDS	EGJ23722.1	LMOSA_11110	S1 RNA binding domain protein
266828	+	CDS	EGJ23722.1	LMOSA_11110	S1 RNA binding domain protein
266912	+	intergenic region
266921	+	intergenic region
273318	+	CDS	EGJ23727.1	LMOSA_11160	Cysteine synthase
273355	+	CDS	EGJ23727.1	LMOSA_11160	Cysteine synthase
273433	+	CDS	EGJ23727.1	LMOSA_11160	Cysteine synthase
273642	+	CDS	EGJ23727.1	LMOSA_11160	Cysteine synthase
273670	+	CDS	EGJ23727.1	LMOSA_11160	Cysteine synthase
273794	+	CDS	EGJ23727.1	LMOSA_11160	Cysteine synthase
273828	+	CDS	EGJ23727.1	LMOSA_11160	Cysteine synthase
273870	+	CDS	EGJ23727.1	LMOSA_11160	Cysteine synthase
273901	+	CDS	EGJ23727.1	LMOSA_11160	Cysteine synthase
273996	+	CDS	EGJ23727.1	LMOSA_11160	Cysteine synthase
274073	+	CDS	EGJ23727.1	LMOSA_11160	Cysteine synthase
274159	+	CDS	EGJ23727.1	LMOSA_11160	Cysteine synthase
274207	+	CDS	EGJ23727.1	LMOSA_11160	Cysteine synthase
274215	+	intergenic region
279617	+	intergenic region
279651	+	intergenic region
279677	+	intergenic region
279714	+	intergenic region
279722	+	intergenic region
279757	+	intergenic region
279772	+	intergenic region
279800	+	intergenic region
279858	+	intergenic region
279890	+	intergenic region
280008	+	rRNA		LMOSA_r140	16S ribosomal RNA
280022	+	rRNA		LMOSA_r140	16S ribosomal RNA
280030	+	rRNA		LMOSA_r140	16S ribosomal RNA
280055	+	rRNA		LMOSA_r140	16S ribosomal RNA
280063	+	rRNA		LMOSA_r140	16S ribosomal RNA
280086	+	rRNA		LMOSA_r140	16S ribosomal RNA
280095	+	rRNA		LMOSA_r140	16S ribosomal RNA
280128	+	rRNA		LMOSA_r140	16S ribosomal RNA
280151	+	rRNA		LMOSA_r140	16S ribosomal RNA
280184	+	rRNA		LMOSA_r140	16S ribosomal RNA
280227	+	rRNA		LMOSA_r140	16S ribosomal RNA
280259	+	rRNA		LMOSA_r140	16S ribosomal RNA
280270	+	rRNA		LMOSA_r140	16S ribosomal RNA
280303	+	rRNA		LMOSA_r140	16S ribosomal RNA
280335	+	rRNA		LMOSA_r140	16S ribosomal RNA
280353	+	rRNA		LMOSA_r140	16S ribosomal RNA
280368	+	rRNA		LMOSA_r140	16S ribosomal RNA
280386	+	rRNA		LMOSA_r140	16S ribosomal RNA
280440	+	rRNA		LMOSA_r140	16S ribosomal RNA
280448	+	rRNA		LMOSA_r140	16S ribosomal RNA
280520	+	rRNA		LMOSA_r140	16S ribosomal RNA
280530	+	rRNA		LMOSA_r140	16S ribosomal RNA
280539	+	rRNA		LMOSA_r140	16S ribosomal RNA
280550	+	rRNA		LMOSA_r140	16S ribosomal RNA
280585	+	rRNA		LMOSA_r140	16S ribosomal RNA
280617	+	rRNA		LMOSA_r140	16S ribosomal RNA
280626	+	rRNA		LMOSA_r140	16S ribosomal RNA
280634	+	rRNA		LMOSA_r140	16S ribosomal RNA
280651	+	rRNA		LMOSA_r140	16S ribosomal RNA
280700	+	rRNA		LMOSA_r140	16S ribosomal RNA
280714	+	rRNA		LMOSA_r140	16S ribosomal RNA
280724	+	rRNA		LMOSA_r140	16S ribosomal RNA
280755	+	rRNA		LMOSA_r140	16S ribosomal RNA
280783	+	rRNA		LMOSA_r140	16S ribosomal RNA
280791	+	rRNA		LMOSA_r140	16S ribosomal RNA
280807	+	rRNA		LMOSA_r140	16S ribosomal RNA
280870	+	rRNA		LMOSA_r140	16S ribosomal RNA
280888	+	rRNA		LMOSA_r140	16S ribosomal RNA
280942	+	rRNA		LMOSA_r140	16S ribosomal RNA
280963	+	rRNA		LMOSA_r140	16S ribosomal RNA
280972	+	rRNA		LMOSA_r140	16S ribosomal RNA
280985	+	rRNA		LMOSA_r140	16S ribosomal RNA
281008	+	rRNA		LMOSA_r140	16S ribosomal RNA
281038	+	rRNA		LMOSA_r140	16S ribosomal RNA
281049	+	rRNA		LMOSA_r140	16S ribosomal RNA
281063	+	rRNA		LMOSA_r140	16S ribosomal RNA
281100	+	rRNA		LMOSA_r140	16S ribosomal RNA
281111	+	rRNA		LMOSA_r140	16S ribosomal RNA
281162	+	rRNA		LMOSA_r140	16S ribosomal RNA
281198	+	rRNA		LMOSA_r140	16S ribosomal RNA
281217	+	rRNA		LMOSA_r140	16S ribosomal RNA
281253	+	rRNA		LMOSA_r140	16S ribosomal RNA
281332	+	rRNA		LMOSA_r140	16S ribosomal RNA
281356	+	rRNA		LMOSA_r140	16S ribosomal RNA
281420	+	rRNA		LMOSA_r140	16S ribosomal RNA
281440	+	rRNA		LMOSA_r140	16S ribosomal RNA
281454	+	rRNA		LMOSA_r140	16S ribosomal RNA
281473	+	intergenic region
281486	+	intergenic region
281513	+	intergenic region
281521	+	intergenic region
281529	+	intergenic region
281537	+	intergenic region
281552	+	intergenic region
281560	+	intergenic region
281574	+	intergenic region
281587	+	intergenic region
281613	+	intergenic region
281636	+	intergenic region
281655	+	intergenic region
281677	+	intergenic region
281702	+	intergenic region
281720	+	rRNA		LMOSA_r80	23S ribosomal RNA
281738	+	rRNA		LMOSA_r80	23S ribosomal RNA
281782	+	rRNA		LMOSA_r80	23S ribosomal RNA
281795	+	rRNA		LMOSA_r80	23S ribosomal RNA
281854	+	rRNA		LMOSA_r80	23S ribosomal RNA
281886	+	rRNA		LMOSA_r80	23S ribosomal RNA
281894	+	rRNA		LMOSA_r80	23S ribosomal RNA
281916	+	rRNA		LMOSA_r80	23S ribosomal RNA
281972	+	rRNA		LMOSA_r80	23S ribosomal RNA
281993	+	rRNA		LMOSA_r80	23S ribosomal RNA
282009	+	rRNA		LMOSA_r80	23S ribosomal RNA
282044	+	rRNA		LMOSA_r80	23S ribosomal RNA
282064	+	rRNA		LMOSA_r80	23S ribosomal RNA
282083	+	rRNA		LMOSA_r80	23S ribosomal RNA
282099	+	rRNA		LMOSA_r80	23S ribosomal RNA
282150	+	rRNA		LMOSA_r80	23S ribosomal RNA
282164	+	rRNA		LMOSA_r80	23S ribosomal RNA
282187	+	rRNA		LMOSA_r80	23S ribosomal RNA
282240	+	rRNA		LMOSA_r80	23S ribosomal RNA
282291	+	rRNA		LMOSA_r80	23S ribosomal RNA
282329	+	rRNA		LMOSA_r80	23S ribosomal RNA
282355	+	rRNA		LMOSA_r80	23S ribosomal RNA
282413	+	rRNA		LMOSA_r80	23S ribosomal RNA
282444	+	rRNA		LMOSA_r80	23S ribosomal RNA
282461	+	rRNA		LMOSA_r80	23S ribosomal RNA
282504	+	rRNA		LMOSA_r80	23S ribosomal RNA
282519	+	rRNA		LMOSA_r80	23S ribosomal RNA
282596	+	rRNA		LMOSA_r80	23S ribosomal RNA
282625	+	rRNA		LMOSA_r80	23S ribosomal RNA
282664	+	rRNA		LMOSA_r80	23S ribosomal RNA
282699	+	rRNA		LMOSA_r80	23S ribosomal RNA
282719	+	rRNA		LMOSA_r80	23S ribosomal RNA
282746	+	rRNA		LMOSA_r80	23S ribosomal RNA
282756	+	rRNA		LMOSA_r80	23S ribosomal RNA
282817	+	rRNA		LMOSA_r80	23S ribosomal RNA
282826	+	rRNA		LMOSA_r80	23S ribosomal RNA
282848	+	rRNA		LMOSA_r80	23S ribosomal RNA
282886	+	rRNA		LMOSA_r80	23S ribosomal RNA
282922	+	rRNA		LMOSA_r80	23S ribosomal RNA
282934	+	rRNA		LMOSA_r80	23S ribosomal RNA
282981	+	rRNA		LMOSA_r80	23S ribosomal RNA
282994	+	rRNA		LMOSA_r80	23S ribosomal RNA
283002	+	rRNA		LMOSA_r80	23S ribosomal RNA
283027	+	rRNA		LMOSA_r80	23S ribosomal RNA
283038	+	rRNA		LMOSA_r80	23S ribosomal RNA
283122	+	rRNA		LMOSA_r80	23S ribosomal RNA
283136	+	rRNA		LMOSA_r80	23S ribosomal RNA
283144	+	rRNA		LMOSA_r80	23S ribosomal RNA
283162	+	rRNA		LMOSA_r80	23S ribosomal RNA
283181	+	rRNA		LMOSA_r80	23S ribosomal RNA
283199	+	rRNA		LMOSA_r80	23S ribosomal RNA
283226	+	rRNA		LMOSA_r80	23S ribosomal RNA
283248	+	rRNA		LMOSA_r80	23S ribosomal RNA
283276	+	rRNA		LMOSA_r80	23S ribosomal RNA
283285	+	rRNA		LMOSA_r80	23S ribosomal RNA
283306	+	rRNA		LMOSA_r80	23S ribosomal RNA
283333	+	rRNA		LMOSA_r80	23S ribosomal RNA
283348	+	rRNA		LMOSA_r80	23S ribosomal RNA
283385	+	rRNA		LMOSA_r80	23S ribosomal RNA
283397	+	rRNA		LMOSA_r80	23S ribosomal RNA
283407	+	rRNA		LMOSA_r80	23S ribosomal RNA
283480	+	rRNA		LMOSA_r80	23S ribosomal RNA
283576	+	rRNA		LMOSA_r80	23S ribosomal RNA
283604	+	rRNA		LMOSA_r80	23S ribosomal RNA
283641	+	rRNA		LMOSA_r80	23S ribosomal RNA
283654	+	rRNA		LMOSA_r80	23S ribosomal RNA
283664	+	rRNA		LMOSA_r80	23S ribosomal RNA
283697	+	rRNA		LMOSA_r80	23S ribosomal RNA
283714	+	rRNA		LMOSA_r80	23S ribosomal RNA
283725	+	rRNA		LMOSA_r80	23S ribosomal RNA
283780	+	rRNA		LMOSA_r80	23S ribosomal RNA
283801	+	rRNA		LMOSA_r80	23S ribosomal RNA
283830	+	rRNA		LMOSA_r80	23S ribosomal RNA
283858	+	rRNA		LMOSA_r80	23S ribosomal RNA
283902	+	rRNA		LMOSA_r80	23S ribosomal RNA
283915	+	rRNA		LMOSA_r80	23S ribosomal RNA
283953	+	rRNA		LMOSA_r80	23S ribosomal RNA
283968	+	rRNA		LMOSA_r80	23S ribosomal RNA
283986	+	rRNA		LMOSA_r80	23S ribosomal RNA
284017	+	rRNA		LMOSA_r80	23S ribosomal RNA
284046	+	rRNA		LMOSA_r80	23S ribosomal RNA
284119	+	rRNA		LMOSA_r80	23S ribosomal RNA
284128	+	rRNA		LMOSA_r80	23S ribosomal RNA
284155	+	rRNA		LMOSA_r80	23S ribosomal RNA
284173	+	rRNA		LMOSA_r80	23S ribosomal RNA
284182	+	rRNA		LMOSA_r80	23S ribosomal RNA
284193	+	rRNA		LMOSA_r80	23S ribosomal RNA
284227	+	rRNA		LMOSA_r80	23S ribosomal RNA
284235	+	rRNA		LMOSA_r80	23S ribosomal RNA
284249	+	rRNA		LMOSA_r80	23S ribosomal RNA
284281	+	rRNA		LMOSA_r80	23S ribosomal RNA
284315	+	rRNA		LMOSA_r80	23S ribosomal RNA
284336	+	rRNA		LMOSA_r80	23S ribosomal RNA
284344	+	rRNA		LMOSA_r80	23S ribosomal RNA
284380	+	rRNA		LMOSA_r80	23S ribosomal RNA
284417	+	rRNA		LMOSA_r80	23S ribosomal RNA
284451	+	rRNA		LMOSA_r80	23S ribosomal RNA
284492	+	rRNA		LMOSA_r80	23S ribosomal RNA
284509	+	rRNA		LMOSA_r80	23S ribosomal RNA
284520	+	rRNA		LMOSA_r80	23S ribosomal RNA
284544	+	rRNA		LMOSA_r80	23S ribosomal RNA
284553	+	rRNA		LMOSA_r80	23S ribosomal RNA
284566	+	rRNA		LMOSA_r80	23S ribosomal RNA
284577	+	rRNA		LMOSA_r80	23S ribosomal RNA
284588	+	rRNA		LMOSA_r80	23S ribosomal RNA
284599	+	rRNA		LMOSA_r80	23S ribosomal RNA
284611	+	rRNA		LMOSA_r80	23S ribosomal RNA
284629	+	rRNA		LMOSA_r80	23S ribosomal RNA
284658	+	intergenic region
284693	+	intergenic region
284720	+	intergenic region
284740	+	rRNA		LMOSA_r20	5S ribosomal RNA
284780	+	rRNA		LMOSA_r20	5S ribosomal RNA
284789	+	rRNA		LMOSA_r20	5S ribosomal RNA
284798	+	rRNA		LMOSA_r20	5S ribosomal RNA
284806	+	rRNA		LMOSA_r20	5S ribosomal RNA
285735	+	intergenic region
285777	+	intergenic region
285793	+	intergenic region
285821	+	intergenic region
285878	+	intergenic region
285915	+	intergenic region
286028	+	rRNA		LMOSA_r170	16S ribosomal RNA
286042	+	rRNA		LMOSA_r170	16S ribosomal RNA
286050	+	rRNA		LMOSA_r170	16S ribosomal RNA
286075	+	rRNA		LMOSA_r170	16S ribosomal RNA
286083	+	rRNA		LMOSA_r170	16S ribosomal RNA
286106	+	rRNA		LMOSA_r170	16S ribosomal RNA
286115	+	rRNA		LMOSA_r170	16S ribosomal RNA
286148	+	rRNA		LMOSA_r170	16S ribosomal RNA
286171	+	rRNA		LMOSA_r170	16S ribosomal RNA
286204	+	rRNA		LMOSA_r170	16S ribosomal RNA
286247	+	rRNA		LMOSA_r170	16S ribosomal RNA
286279	+	rRNA		LMOSA_r170	16S ribosomal RNA
286290	+	rRNA		LMOSA_r170	16S ribosomal RNA
286323	+	rRNA		LMOSA_r170	16S ribosomal RNA
286355	+	rRNA		LMOSA_r170	16S ribosomal RNA
286373	+	rRNA		LMOSA_r170	16S ribosomal RNA
286388	+	rRNA		LMOSA_r170	16S ribosomal RNA
286406	+	rRNA		LMOSA_r170	16S ribosomal RNA
286460	+	rRNA		LMOSA_r170	16S ribosomal RNA
286468	+	rRNA		LMOSA_r170	16S ribosomal RNA
286540	+	rRNA		LMOSA_r170	16S ribosomal RNA
286550	+	rRNA		LMOSA_r170	16S ribosomal RNA
286559	+	rRNA		LMOSA_r170	16S ribosomal RNA
286570	+	rRNA		LMOSA_r170	16S ribosomal RNA
286605	+	rRNA		LMOSA_r170	16S ribosomal RNA
286646	+	rRNA		LMOSA_r170	16S ribosomal RNA
286654	+	rRNA		LMOSA_r170	16S ribosomal RNA
286671	+	rRNA		LMOSA_r170	16S ribosomal RNA
286720	+	rRNA		LMOSA_r170	16S ribosomal RNA
286734	+	rRNA		LMOSA_r170	16S ribosomal RNA
286775	+	rRNA		LMOSA_r170	16S ribosomal RNA
286803	+	rRNA		LMOSA_r170	16S ribosomal RNA
286811	+	rRNA		LMOSA_r170	16S ribosomal RNA
286827	+	rRNA		LMOSA_r170	16S ribosomal RNA
286890	+	rRNA		LMOSA_r170	16S ribosomal RNA
286908	+	rRNA		LMOSA_r170	16S ribosomal RNA
286962	+	rRNA		LMOSA_r170	16S ribosomal RNA
286983	+	rRNA		LMOSA_r170	16S ribosomal RNA
286992	+	rRNA		LMOSA_r170	16S ribosomal RNA
287005	+	rRNA		LMOSA_r170	16S ribosomal RNA
287028	+	rRNA		LMOSA_r170	16S ribosomal RNA
287058	+	rRNA		LMOSA_r170	16S ribosomal RNA
287069	+	rRNA		LMOSA_r170	16S ribosomal RNA
287083	+	rRNA		LMOSA_r170	16S ribosomal RNA
287120	+	rRNA		LMOSA_r170	16S ribosomal RNA
287131	+	rRNA		LMOSA_r170	16S ribosomal RNA
287182	+	rRNA		LMOSA_r170	16S ribosomal RNA
287218	+	rRNA		LMOSA_r170	16S ribosomal RNA
287237	+	rRNA		LMOSA_r170	16S ribosomal RNA
287273	+	rRNA		LMOSA_r170	16S ribosomal RNA
287352	+	rRNA		LMOSA_r170	16S ribosomal RNA
287376	+	rRNA		LMOSA_r170	16S ribosomal RNA
287440	+	rRNA		LMOSA_r170	16S ribosomal RNA
287460	+	rRNA		LMOSA_r170	16S ribosomal RNA
287474	+	rRNA		LMOSA_r170	16S ribosomal RNA
287493	+	intergenic region
287506	+	intergenic region
287533	+	intergenic region
287541	+	intergenic region
287558	+	intergenic region
287572	+	intergenic region
287580	+	intergenic region
287589	+	intergenic region
287607	+	intergenic region
287631	+	intergenic region
287654	+	intergenic region
287666	+	intergenic region
287675	+	intergenic region
287697	+	intergenic region
287723	+	intergenic region
287758	+	rRNA		LMOSA_r110	23S ribosomal RNA
287803	+	rRNA		LMOSA_r110	23S ribosomal RNA
287815	+	rRNA		LMOSA_r110	23S ribosomal RNA
287874	+	rRNA		LMOSA_r110	23S ribosomal RNA
287906	+	rRNA		LMOSA_r110	23S ribosomal RNA
287914	+	rRNA		LMOSA_r110	23S ribosomal RNA
287936	+	rRNA		LMOSA_r110	23S ribosomal RNA
287992	+	rRNA		LMOSA_r110	23S ribosomal RNA
288013	+	rRNA		LMOSA_r110	23S ribosomal RNA
288029	+	rRNA		LMOSA_r110	23S ribosomal RNA
288064	+	rRNA		LMOSA_r110	23S ribosomal RNA
288084	+	rRNA		LMOSA_r110	23S ribosomal RNA
288103	+	rRNA		LMOSA_r110	23S ribosomal RNA
288119	+	rRNA		LMOSA_r110	23S ribosomal RNA
288170	+	rRNA		LMOSA_r110	23S ribosomal RNA
288184	+	rRNA		LMOSA_r110	23S ribosomal RNA
288207	+	rRNA		LMOSA_r110	23S ribosomal RNA
288260	+	rRNA		LMOSA_r110	23S ribosomal RNA
288311	+	rRNA		LMOSA_r110	23S ribosomal RNA
288349	+	rRNA		LMOSA_r110	23S ribosomal RNA
288375	+	rRNA		LMOSA_r110	23S ribosomal RNA
288385	+	rRNA		LMOSA_r110	23S ribosomal RNA
288406	+	rRNA		LMOSA_r110	23S ribosomal RNA
288433	+	rRNA		LMOSA_r110	23S ribosomal RNA
288464	+	rRNA		LMOSA_r110	23S ribosomal RNA
288481	+	rRNA		LMOSA_r110	23S ribosomal RNA
288524	+	rRNA		LMOSA_r110	23S ribosomal RNA
288539	+	rRNA		LMOSA_r110	23S ribosomal RNA
288616	+	rRNA		LMOSA_r110	23S ribosomal RNA
288645	+	rRNA		LMOSA_r110	23S ribosomal RNA
288684	+	rRNA		LMOSA_r110	23S ribosomal RNA
288719	+	rRNA		LMOSA_r110	23S ribosomal RNA
288739	+	rRNA		LMOSA_r110	23S ribosomal RNA
288766	+	rRNA		LMOSA_r110	23S ribosomal RNA
288776	+	rRNA		LMOSA_r110	23S ribosomal RNA
288837	+	rRNA		LMOSA_r110	23S ribosomal RNA
288846	+	rRNA		LMOSA_r110	23S ribosomal RNA
288868	+	rRNA		LMOSA_r110	23S ribosomal RNA
288906	+	rRNA		LMOSA_r110	23S ribosomal RNA
288942	+	rRNA		LMOSA_r110	23S ribosomal RNA
288957	+	rRNA		LMOSA_r110	23S ribosomal RNA
289001	+	rRNA		LMOSA_r110	23S ribosomal RNA
289014	+	rRNA		LMOSA_r110	23S ribosomal RNA
289022	+	rRNA		LMOSA_r110	23S ribosomal RNA
289047	+	rRNA		LMOSA_r110	23S ribosomal RNA
289058	+	rRNA		LMOSA_r110	23S ribosomal RNA
289142	+	rRNA		LMOSA_r110	23S ribosomal RNA
289156	+	rRNA		LMOSA_r110	23S ribosomal RNA
289164	+	rRNA		LMOSA_r110	23S ribosomal RNA
289182	+	rRNA		LMOSA_r110	23S ribosomal RNA
289201	+	rRNA		LMOSA_r110	23S ribosomal RNA
289219	+	rRNA		LMOSA_r110	23S ribosomal RNA
289246	+	rRNA		LMOSA_r110	23S ribosomal RNA
289268	+	rRNA		LMOSA_r110	23S ribosomal RNA
289296	+	rRNA		LMOSA_r110	23S ribosomal RNA
289305	+	rRNA		LMOSA_r110	23S ribosomal RNA
289326	+	rRNA		LMOSA_r110	23S ribosomal RNA
289353	+	rRNA		LMOSA_r110	23S ribosomal RNA
289368	+	rRNA		LMOSA_r110	23S ribosomal RNA
289405	+	rRNA		LMOSA_r110	23S ribosomal RNA
289417	+	rRNA		LMOSA_r110	23S ribosomal RNA
289427	+	rRNA		LMOSA_r110	23S ribosomal RNA
289500	+	rRNA		LMOSA_r110	23S ribosomal RNA
289595	+	rRNA		LMOSA_r110	23S ribosomal RNA
289624	+	rRNA		LMOSA_r110	23S ribosomal RNA
289661	+	rRNA		LMOSA_r110	23S ribosomal RNA
289674	+	rRNA		LMOSA_r110	23S ribosomal RNA
289684	+	rRNA		LMOSA_r110	23S ribosomal RNA
289717	+	rRNA		LMOSA_r110	23S ribosomal RNA
289734	+	rRNA		LMOSA_r110	23S ribosomal RNA
289745	+	rRNA		LMOSA_r110	23S ribosomal RNA
289800	+	rRNA		LMOSA_r110	23S ribosomal RNA
289821	+	rRNA		LMOSA_r110	23S ribosomal RNA
289850	+	rRNA		LMOSA_r110	23S ribosomal RNA
289878	+	rRNA		LMOSA_r110	23S ribosomal RNA
289922	+	rRNA		LMOSA_r110	23S ribosomal RNA
289935	+	rRNA		LMOSA_r110	23S ribosomal RNA
289973	+	rRNA		LMOSA_r110	23S ribosomal RNA
289988	+	rRNA		LMOSA_r110	23S ribosomal RNA
290006	+	rRNA		LMOSA_r110	23S ribosomal RNA
290016	+	rRNA		LMOSA_r110	23S ribosomal RNA
290037	+	rRNA		LMOSA_r110	23S ribosomal RNA
290066	+	rRNA		LMOSA_r110	23S ribosomal RNA
290139	+	rRNA		LMOSA_r110	23S ribosomal RNA
290148	+	rRNA		LMOSA_r110	23S ribosomal RNA
290175	+	rRNA		LMOSA_r110	23S ribosomal RNA
290193	+	rRNA		LMOSA_r110	23S ribosomal RNA
290202	+	rRNA		LMOSA_r110	23S ribosomal RNA
290213	+	rRNA		LMOSA_r110	23S ribosomal RNA
290247	+	rRNA		LMOSA_r110	23S ribosomal RNA
290255	+	rRNA		LMOSA_r110	23S ribosomal RNA
290269	+	rRNA		LMOSA_r110	23S ribosomal RNA
290301	+	rRNA		LMOSA_r110	23S ribosomal RNA
290335	+	rRNA		LMOSA_r110	23S ribosomal RNA
290356	+	rRNA		LMOSA_r110	23S ribosomal RNA
290364	+	rRNA		LMOSA_r110	23S ribosomal RNA
290400	+	rRNA		LMOSA_r110	23S ribosomal RNA
290437	+	rRNA		LMOSA_r110	23S ribosomal RNA
290471	+	rRNA		LMOSA_r110	23S ribosomal RNA
290512	+	rRNA		LMOSA_r110	23S ribosomal RNA
290529	+	rRNA		LMOSA_r110	23S ribosomal RNA
290540	+	rRNA		LMOSA_r110	23S ribosomal RNA
290564	+	rRNA		LMOSA_r110	23S ribosomal RNA
290573	+	rRNA		LMOSA_r110	23S ribosomal RNA
290586	+	rRNA		LMOSA_r110	23S ribosomal RNA
290597	+	rRNA		LMOSA_r110	23S ribosomal RNA
290608	+	rRNA		LMOSA_r110	23S ribosomal RNA
290619	+	rRNA		LMOSA_r110	23S ribosomal RNA
290631	+	rRNA		LMOSA_r110	23S ribosomal RNA
290649	+	rRNA		LMOSA_r110	23S ribosomal RNA
290676	+	intergenic region
290714	+	intergenic region
290741	+	intergenic region
290760	+	rRNA		LMOSA_r50	5S ribosomal RNA
290800	+	rRNA		LMOSA_r50	5S ribosomal RNA
290809	+	rRNA		LMOSA_r50	5S ribosomal RNA
290819	+	rRNA		LMOSA_r50	5S ribosomal RNA
291129	+	CDS	EGJ23735.1	LMOSA_11270	Transcriptional regulator CtsR
291170	+	CDS	EGJ23735.1	LMOSA_11270	Transcriptional regulator CtsR
291242	+	CDS	EGJ23735.1	LMOSA_11270	Transcriptional regulator CtsR
291298	+	CDS	EGJ23735.1	LMOSA_11270	Transcriptional regulator CtsR
291348	+	CDS	EGJ23735.1	LMOSA_11270	Transcriptional regulator CtsR
291370	+	CDS	EGJ23735.1	LMOSA_11270	Transcriptional regulator CtsR
291427	+	CDS	EGJ23735.1	LMOSA_11270	Transcriptional regulator CtsR
291467	+	CDS	EGJ23736.1	LMOSA_11280	UVR domain protein
291579	+	CDS	EGJ23736.1	LMOSA_11280	UVR domain protein
291858	+	CDS	EGJ23736.1	LMOSA_11280	UVR domain protein
291886	+	CDS	EGJ23736.1	LMOSA_11280	UVR domain protein
291952	+	CDS	EGJ23736.1	LMOSA_11280	UVR domain protein
292093	+	CDS	EGJ23737.1	LMOSA_11290	ATP:guanido phosphotransferase
292146	+	CDS	EGJ23737.1	LMOSA_11290	ATP:guanido phosphotransferase
292217	+	CDS	EGJ23737.1	LMOSA_11290	ATP:guanido phosphotransferase
292663	+	CDS	EGJ23737.1	LMOSA_11290	ATP:guanido phosphotransferase
292766	+	CDS	EGJ23737.1	LMOSA_11290	ATP:guanido phosphotransferase
292817	+	CDS	EGJ23737.1	LMOSA_11290	ATP:guanido phosphotransferase
292831	+	CDS	EGJ23737.1	LMOSA_11290	ATP:guanido phosphotransferase
292929	+	CDS	EGJ23737.1	LMOSA_11290	ATP:guanido phosphotransferase
292965	+	CDS	EGJ23737.1	LMOSA_11290	ATP:guanido phosphotransferase
293010	+	CDS	EGJ23737.1	LMOSA_11290	ATP:guanido phosphotransferase
293027	+	intergenic region
293052	+	CDS	EGJ23738.1	LMOSA_11300	Chaperone protein ClpB
293071	+	CDS	EGJ23738.1	LMOSA_11300	Chaperone protein ClpB
293253	+	CDS	EGJ23738.1	LMOSA_11300	Chaperone protein ClpB
293267	+	CDS	EGJ23738.1	LMOSA_11300	Chaperone protein ClpB
293275	+	CDS	EGJ23738.1	LMOSA_11300	Chaperone protein ClpB
293316	+	CDS	EGJ23738.1	LMOSA_11300	Chaperone protein ClpB
293411	+	CDS	EGJ23738.1	LMOSA_11300	Chaperone protein ClpB
293475	+	CDS	EGJ23738.1	LMOSA_11300	Chaperone protein ClpB
293524	+	CDS	EGJ23738.1	LMOSA_11300	Chaperone protein ClpB
293566	+	CDS	EGJ23738.1	LMOSA_11300	Chaperone protein ClpB
293633	+	CDS	EGJ23738.1	LMOSA_11300	Chaperone protein ClpB
293722	+	CDS	EGJ23738.1	LMOSA_11300	Chaperone protein ClpB
293752	+	CDS	EGJ23738.1	LMOSA_11300	Chaperone protein ClpB
293764	+	CDS	EGJ23738.1	LMOSA_11300	Chaperone protein ClpB
293807	+	CDS	EGJ23738.1	LMOSA_11300	Chaperone protein ClpB
293834	+	CDS	EGJ23738.1	LMOSA_11300	Chaperone protein ClpB
293904	+	CDS	EGJ23738.1	LMOSA_11300	Chaperone protein ClpB
293990	+	CDS	EGJ23738.1	LMOSA_11300	Chaperone protein ClpB
294009	+	CDS	EGJ23738.1	LMOSA_11300	Chaperone protein ClpB
294017	+	CDS	EGJ23738.1	LMOSA_11300	Chaperone protein ClpB
294033	+	CDS	EGJ23738.1	LMOSA_11300	Chaperone protein ClpB
294047	+	CDS	EGJ23738.1	LMOSA_11300	Chaperone protein ClpB
294055	+	CDS	EGJ23738.1	LMOSA_11300	Chaperone protein ClpB
294066	+	CDS	EGJ23738.1	LMOSA_11300	Chaperone protein ClpB
294139	+	CDS	EGJ23738.1	LMOSA_11300	Chaperone protein ClpB
294147	+	CDS	EGJ23738.1	LMOSA_11300	Chaperone protein ClpB
294201	+	CDS	EGJ23738.1	LMOSA_11300	Chaperone protein ClpB
294213	+	CDS	EGJ23738.1	LMOSA_11300	Chaperone protein ClpB
294238	+	CDS	EGJ23738.1	LMOSA_11300	Chaperone protein ClpB
294247	+	CDS	EGJ23738.1	LMOSA_11300	Chaperone protein ClpB
294291	+	CDS	EGJ23738.1	LMOSA_11300	Chaperone protein ClpB
294328	+	CDS	EGJ23738.1	LMOSA_11300	Chaperone protein ClpB
294339	+	CDS	EGJ23738.1	LMOSA_11300	Chaperone protein ClpB
294347	+	CDS	EGJ23738.1	LMOSA_11300	Chaperone protein ClpB
294366	+	CDS	EGJ23738.1	LMOSA_11300	Chaperone protein ClpB
294395	+	CDS	EGJ23738.1	LMOSA_11300	Chaperone protein ClpB
294445	+	CDS	EGJ23738.1	LMOSA_11300	Chaperone protein ClpB
294490	+	CDS	EGJ23738.1	LMOSA_11300	Chaperone protein ClpB
294720	+	CDS	EGJ23738.1	LMOSA_11300	Chaperone protein ClpB
294731	+	CDS	EGJ23738.1	LMOSA_11300	Chaperone protein ClpB
294795	+	CDS	EGJ23738.1	LMOSA_11300	Chaperone protein ClpB
294826	+	CDS	EGJ23738.1	LMOSA_11300	Chaperone protein ClpB
294847	+	CDS	EGJ23738.1	LMOSA_11300	Chaperone protein ClpB
294885	+	CDS	EGJ23738.1	LMOSA_11300	Chaperone protein ClpB
294911	+	CDS	EGJ23738.1	LMOSA_11300	Chaperone protein ClpB
294939	+	CDS	EGJ23738.1	LMOSA_11300	Chaperone protein ClpB
294967	+	CDS	EGJ23738.1	LMOSA_11300	Chaperone protein ClpB
295122	+	CDS	EGJ23738.1	LMOSA_11300	Chaperone protein ClpB
295154	+	CDS	EGJ23738.1	LMOSA_11300	Chaperone protein ClpB
295267	+	CDS	EGJ23738.1	LMOSA_11300	Chaperone protein ClpB
295297	+	CDS	EGJ23738.1	LMOSA_11300	Chaperone protein ClpB
295396	+	CDS	EGJ23738.1	LMOSA_11300	Chaperone protein ClpB
295430	+	CDS	EGJ23738.1	LMOSA_11300	Chaperone protein ClpB
295438	+	CDS	EGJ23738.1	LMOSA_11300	Chaperone protein ClpB
295447	+	CDS	EGJ23738.1	LMOSA_11300	Chaperone protein ClpB
295463	+	CDS	EGJ23738.1	LMOSA_11300	Chaperone protein ClpB
295480	+	CDS	EGJ23738.1	LMOSA_11300	Chaperone protein ClpB
295498	+	CDS	EGJ23738.1	LMOSA_11300	Chaperone protein ClpB
295508	+	intergenic region
295531	+	intergenic region
298106	+	CDS	EGJ23740.1	LMOSA_11320	hypothetical protein
298128	+	CDS	EGJ23740.1	LMOSA_11320	hypothetical protein
305905	+	intergenic region
306000	+	intergenic region
306073	+	CDS	EGJ23750.1	LMOSA_11420	preprotein translocase subunit SecE
335104	+	CDS	EGJ23774.1	LMOSA_11650	Internalin D
335120	+	CDS	EGJ23774.1	LMOSA_11650	Internalin D
335168	+	CDS	EGJ23774.1	LMOSA_11650	Internalin D
335208	+	CDS	EGJ23774.1	LMOSA_11650	Internalin D
335242	+	CDS	EGJ23774.1	LMOSA_11650	Internalin D
335313	+	CDS	EGJ23774.1	LMOSA_11650	Internalin D
335349	+	CDS	EGJ23774.1	LMOSA_11650	Internalin D
335372	+	CDS	EGJ23774.1	LMOSA_11650	Internalin D
335490	+	CDS	EGJ23774.1	LMOSA_11650	Internalin D
335505	+	CDS	EGJ23774.1	LMOSA_11650	Internalin D
335610	+	CDS	EGJ23774.1	LMOSA_11650	Internalin D
335639	+	CDS	EGJ23774.1	LMOSA_11650	Internalin D
335697	+	CDS	EGJ23774.1	LMOSA_11650	Internalin D
335982	+	CDS	EGJ23774.1	LMOSA_11650	Internalin D
336047	+	CDS	EGJ23774.1	LMOSA_11650	Internalin D
336058	+	CDS	EGJ23774.1	LMOSA_11650	Internalin D
336269	+	CDS	EGJ23774.1	LMOSA_11650	Internalin D
336311	+	CDS	EGJ23774.1	LMOSA_11650	Internalin D
340322	+	CDS	EGJ23777.1	LMOSA_11680	Peptidase%2C M20/M25/M40 family
340380	+	CDS	EGJ23777.1	LMOSA_11680	Peptidase%2C M20/M25/M40 family
340409	+	CDS	EGJ23777.1	LMOSA_11680	Peptidase%2C M20/M25/M40 family
340417	+	CDS	EGJ23777.1	LMOSA_11680	Peptidase%2C M20/M25/M40 family
340438	+	CDS	EGJ23777.1	LMOSA_11680	Peptidase%2C M20/M25/M40 family
340455	+	CDS	EGJ23777.1	LMOSA_11680	Peptidase%2C M20/M25/M40 family
340470	+	CDS	EGJ23777.1	LMOSA_11680	Peptidase%2C M20/M25/M40 family
340498	+	CDS	EGJ23777.1	LMOSA_11680	Peptidase%2C M20/M25/M40 family
340530	+	CDS	EGJ23777.1	LMOSA_11680	Peptidase%2C M20/M25/M40 family
340559	+	CDS	EGJ23777.1	LMOSA_11680	Peptidase%2C M20/M25/M40 family
340607	+	CDS	EGJ23777.1	LMOSA_11680	Peptidase%2C M20/M25/M40 family
340619	+	CDS	EGJ23777.1	LMOSA_11680	Peptidase%2C M20/M25/M40 family
340671	+	CDS	EGJ23777.1	LMOSA_11680	Peptidase%2C M20/M25/M40 family
340699	+	CDS	EGJ23777.1	LMOSA_11680	Peptidase%2C M20/M25/M40 family
340724	+	CDS	EGJ23777.1	LMOSA_11680	Peptidase%2C M20/M25/M40 family
340759	+	CDS	EGJ23777.1	LMOSA_11680	Peptidase%2C M20/M25/M40 family
340775	+	CDS	EGJ23777.1	LMOSA_11680	Peptidase%2C M20/M25/M40 family
340783	+	CDS	EGJ23777.1	LMOSA_11680	Peptidase%2C M20/M25/M40 family
340860	+	CDS	EGJ23777.1	LMOSA_11680	Peptidase%2C M20/M25/M40 family
340889	+	CDS	EGJ23777.1	LMOSA_11680	Peptidase%2C M20/M25/M40 family
340956	+	CDS	EGJ23777.1	LMOSA_11680	Peptidase%2C M20/M25/M40 family
340966	+	CDS	EGJ23777.1	LMOSA_11680	Peptidase%2C M20/M25/M40 family
341035	+	CDS	EGJ23777.1	LMOSA_11680	Peptidase%2C M20/M25/M40 family
341094	+	CDS	EGJ23777.1	LMOSA_11680	Peptidase%2C M20/M25/M40 family
341299	+	CDS	EGJ23777.1	LMOSA_11680	Peptidase%2C M20/M25/M40 family
341322	+	CDS	EGJ23777.1	LMOSA_11680	Peptidase%2C M20/M25/M40 family
341417	+	CDS	EGJ23777.1	LMOSA_11680	Peptidase%2C M20/M25/M40 family
341488	+	intergenic region
341501	+	intergenic region
342454	+	CDS	EGJ23779.1	LMOSA_11700	Glyoxalase family protein
342908	+	CDS	EGJ23779.1	LMOSA_11700	Glyoxalase family protein
343043	+	intergenic region
343060	+	CDS	EGJ23780.1	LMOSA_11710	Phosphoglycerate mutase family protein
343131	+	CDS	EGJ23780.1	LMOSA_11710	Phosphoglycerate mutase family protein
343238	+	CDS	EGJ23780.1	LMOSA_11710	Phosphoglycerate mutase family protein
343246	+	CDS	EGJ23780.1	LMOSA_11710	Phosphoglycerate mutase family protein
343284	+	CDS	EGJ23780.1	LMOSA_11710	Phosphoglycerate mutase family protein
343328	+	CDS	EGJ23780.1	LMOSA_11710	Phosphoglycerate mutase family protein
343341	+	CDS	EGJ23780.1	LMOSA_11710	Phosphoglycerate mutase family protein
343356	+	CDS	EGJ23780.1	LMOSA_11710	Phosphoglycerate mutase family protein
343462	+	CDS	EGJ23780.1	LMOSA_11710	Phosphoglycerate mutase family protein
343625	+	CDS	EGJ23780.1	LMOSA_11710	Phosphoglycerate mutase family protein
343658	+	CDS	EGJ23780.1	LMOSA_11710	Phosphoglycerate mutase family protein
343686	+	CDS	EGJ23780.1	LMOSA_11710	Phosphoglycerate mutase family protein
343714	+	intergenic region
350643	-	CDS	EGJ23787.1	LMOSA_11780	hypothetical protein
350760	-	CDS	EGJ23787.1	LMOSA_11780	hypothetical protein
351295	-	intergenic region
351574	-	CDS	EGJ23788.1	LMOSA_11790	Competence protein ComEC/Rec2-related protein
351585	-	CDS	EGJ23788.1	LMOSA_11790	Competence protein ComEC/Rec2-related protein
351623	-	CDS	EGJ23788.1	LMOSA_11790	Competence protein ComEC/Rec2-related protein
351713	-	CDS	EGJ23788.1	LMOSA_11790	Competence protein ComEC/Rec2-related protein
351786	-	CDS	EGJ23788.1	LMOSA_11790	Competence protein ComEC/Rec2-related protein
354591	-	CDS	EGJ23791.1	LMOSA_11820	ABC transporter related protein
354852	-	CDS	EGJ23791.1	LMOSA_11820	ABC transporter related protein
354926	-	CDS	EGJ23791.1	LMOSA_11820	ABC transporter related protein
355089	-	CDS	EGJ23791.1	LMOSA_11820	ABC transporter related protein
364413	+	intergenic region
364493	+	intergenic region
364529	+	CDS	EGJ23800.1	LMOSA_11910	Transcriptional regulatory protein walR
364549	+	CDS	EGJ23800.1	LMOSA_11910	Transcriptional regulatory protein walR
364608	+	CDS	EGJ23800.1	LMOSA_11910	Transcriptional regulatory protein walR
364632	+	CDS	EGJ23800.1	LMOSA_11910	Transcriptional regulatory protein walR
364650	+	CDS	EGJ23800.1	LMOSA_11910	Transcriptional regulatory protein walR
364726	+	CDS	EGJ23800.1	LMOSA_11910	Transcriptional regulatory protein walR
364743	+	CDS	EGJ23800.1	LMOSA_11910	Transcriptional regulatory protein walR
364810	+	CDS	EGJ23800.1	LMOSA_11910	Transcriptional regulatory protein walR
364865	+	CDS	EGJ23800.1	LMOSA_11910	Transcriptional regulatory protein walR
364900	+	CDS	EGJ23800.1	LMOSA_11910	Transcriptional regulatory protein walR
364918	+	CDS	EGJ23800.1	LMOSA_11910	Transcriptional regulatory protein walR
365050	+	CDS	EGJ23800.1	LMOSA_11910	Transcriptional regulatory protein walR
365109	+	CDS	EGJ23800.1	LMOSA_11910	Transcriptional regulatory protein walR
365126	+	CDS	EGJ23800.1	LMOSA_11910	Transcriptional regulatory protein walR
365160	+	CDS	EGJ23800.1	LMOSA_11910	Transcriptional regulatory protein walR
365185	+	CDS	EGJ23800.1	LMOSA_11910	Transcriptional regulatory protein walR
365194	+	CDS	EGJ23800.1	LMOSA_11910	Transcriptional regulatory protein walR
365218	+	CDS	EGJ23800.1	LMOSA_11910	Transcriptional regulatory protein walR
365233	+	CDS	EGJ23800.1	LMOSA_11910	Transcriptional regulatory protein walR
365242	+	intergenic region
365258	+	intergenic region
365273	+	intergenic region
369824	+	CDS	EGJ23804.1	LMOSA_11950	Putative metallo-hydrolase yycJ
370029	+	CDS	EGJ23804.1	LMOSA_11950	Putative metallo-hydrolase yycJ
370049	+	CDS	EGJ23804.1	LMOSA_11950	Putative metallo-hydrolase yycJ
370076	+	CDS	EGJ23804.1	LMOSA_11950	Putative metallo-hydrolase yycJ
370085	+	CDS	EGJ23804.1	LMOSA_11950	Putative metallo-hydrolase yycJ
370125	+	CDS	EGJ23804.1	LMOSA_11950	Putative metallo-hydrolase yycJ
370140	+	CDS	EGJ23804.1	LMOSA_11950	Putative metallo-hydrolase yycJ
370150	+	CDS	EGJ23804.1	LMOSA_11950	Putative metallo-hydrolase yycJ
370179	+	CDS	EGJ23804.1	LMOSA_11950	Putative metallo-hydrolase yycJ
370228	+	CDS	EGJ23804.1	LMOSA_11950	Putative metallo-hydrolase yycJ
370244	+	CDS	EGJ23804.1	LMOSA_11950	Putative metallo-hydrolase yycJ
370291	+	CDS	EGJ23804.1	LMOSA_11950	Putative metallo-hydrolase yycJ
370324	+	CDS	EGJ23804.1	LMOSA_11950	Putative metallo-hydrolase yycJ
370337	+	CDS	EGJ23804.1	LMOSA_11950	Putative metallo-hydrolase yycJ
370447	+	intergenic region
370456	+	intergenic region
370469	+	CDS	EGJ23805.1	LMOSA_11960	Serine protease
370521	+	CDS	EGJ23805.1	LMOSA_11960	Serine protease
370532	+	CDS	EGJ23805.1	LMOSA_11960	Serine protease
370632	+	CDS	EGJ23805.1	LMOSA_11960	Serine protease
370709	+	CDS	EGJ23805.1	LMOSA_11960	Serine protease
370773	+	CDS	EGJ23805.1	LMOSA_11960	Serine protease
370963	+	CDS	EGJ23805.1	LMOSA_11960	Serine protease
370978	+	CDS	EGJ23805.1	LMOSA_11960	Serine protease
370996	+	CDS	EGJ23805.1	LMOSA_11960	Serine protease
371010	+	CDS	EGJ23805.1	LMOSA_11960	Serine protease
371076	+	CDS	EGJ23805.1	LMOSA_11960	Serine protease
371104	+	CDS	EGJ23805.1	LMOSA_11960	Serine protease
371170	+	CDS	EGJ23805.1	LMOSA_11960	Serine protease
371188	+	CDS	EGJ23805.1	LMOSA_11960	Serine protease
371255	+	CDS	EGJ23805.1	LMOSA_11960	Serine protease
371264	+	CDS	EGJ23805.1	LMOSA_11960	Serine protease
371295	+	CDS	EGJ23805.1	LMOSA_11960	Serine protease
371348	+	CDS	EGJ23805.1	LMOSA_11960	Serine protease
371398	+	CDS	EGJ23805.1	LMOSA_11960	Serine protease
371430	+	CDS	EGJ23805.1	LMOSA_11960	Serine protease
371439	+	CDS	EGJ23805.1	LMOSA_11960	Serine protease
371448	+	CDS	EGJ23805.1	LMOSA_11960	Serine protease
371464	+	CDS	EGJ23805.1	LMOSA_11960	Serine protease
371481	+	CDS	EGJ23805.1	LMOSA_11960	Serine protease
371507	+	CDS	EGJ23805.1	LMOSA_11960	Serine protease
371558	+	CDS	EGJ23805.1	LMOSA_11960	Serine protease
371582	+	CDS	EGJ23805.1	LMOSA_11960	Serine protease
371639	+	CDS	EGJ23805.1	LMOSA_11960	Serine protease
371668	+	CDS	EGJ23805.1	LMOSA_11960	Serine protease
371795	+	CDS	EGJ23805.1	LMOSA_11960	Serine protease
371812	+	CDS	EGJ23805.1	LMOSA_11960	Serine protease
371823	+	CDS	EGJ23805.1	LMOSA_11960	Serine protease
371837	+	CDS	EGJ23805.1	LMOSA_11960	Serine protease
371882	+	CDS	EGJ23805.1	LMOSA_11960	Serine protease
371928	+	CDS	EGJ23805.1	LMOSA_11960	Serine protease
371941	+	CDS	EGJ23805.1	LMOSA_11960	Serine protease
371963	+	CDS	EGJ23805.1	LMOSA_11960	Serine protease
371986	+	intergenic region
408226	+	CDS	EGJ23837.1	LMOSA_12280	hypothetical protein
408319	+	CDS	EGJ23837.1	LMOSA_12280	hypothetical protein
408330	+	CDS	EGJ23837.1	LMOSA_12280	hypothetical protein
432427	-	intergenic region
432444	-	intergenic region
432455	-	intergenic region
432473	-	intergenic region
432509	-	CDS	EGJ23854.1	LMOSA_12450	Tkt
432549	-	CDS	EGJ23854.1	LMOSA_12450	Tkt
432562	-	CDS	EGJ23854.1	LMOSA_12450	Tkt
432649	-	CDS	EGJ23854.1	LMOSA_12450	Tkt
432733	-	CDS	EGJ23854.1	LMOSA_12450	Tkt
432789	-	CDS	EGJ23854.1	LMOSA_12450	Tkt
432809	-	CDS	EGJ23854.1	LMOSA_12450	Tkt
432840	-	CDS	EGJ23854.1	LMOSA_12450	Tkt
432860	-	CDS	EGJ23854.1	LMOSA_12450	Tkt
432881	-	CDS	EGJ23854.1	LMOSA_12450	Tkt
433010	-	CDS	EGJ23854.1	LMOSA_12450	Tkt
433091	-	CDS	EGJ23854.1	LMOSA_12450	Tkt
433271	-	CDS	EGJ23854.1	LMOSA_12450	Tkt
433305	-	CDS	EGJ23854.1	LMOSA_12450	Tkt
433334	-	CDS	EGJ23854.1	LMOSA_12450	Tkt
433373	-	CDS	EGJ23854.1	LMOSA_12450	Tkt
433421	-	CDS	EGJ23854.1	LMOSA_12450	Tkt
433443	-	CDS	EGJ23854.1	LMOSA_12450	Tkt
433454	-	CDS	EGJ23854.1	LMOSA_12450	Tkt
433474	-	CDS	EGJ23854.1	LMOSA_12450	Tkt
433487	-	CDS	EGJ23854.1	LMOSA_12450	Tkt
433498	-	CDS	EGJ23854.1	LMOSA_12450	Tkt
433573	-	CDS	EGJ23854.1	LMOSA_12450	Tkt
433653	-	CDS	EGJ23854.1	LMOSA_12450	Tkt
433667	-	CDS	EGJ23854.1	LMOSA_12450	Tkt
433829	-	CDS	EGJ23854.1	LMOSA_12450	Tkt
433882	-	CDS	EGJ23854.1	LMOSA_12450	Tkt
434015	-	CDS	EGJ23854.1	LMOSA_12450	Tkt
434025	-	CDS	EGJ23854.1	LMOSA_12450	Tkt
434123	-	CDS	EGJ23854.1	LMOSA_12450	Tkt
434237	-	CDS	EGJ23854.1	LMOSA_12450	Tkt
434555	-	CDS	EGJ23855.1	LMOSA_12460	Putative transaldolase
434598	-	CDS	EGJ23855.1	LMOSA_12460	Putative transaldolase
435001	-	CDS	EGJ23855.1	LMOSA_12460	Putative transaldolase
435358	-	CDS	EGJ23856.1	LMOSA_12470	Dehydrogenase
435370	-	CDS	EGJ23856.1	LMOSA_12470	Dehydrogenase
435477	-	CDS	EGJ23856.1	LMOSA_12470	Dehydrogenase
435647	-	CDS	EGJ23856.1	LMOSA_12470	Dehydrogenase
437005	-	CDS	EGJ23858.1	LMOSA_12490	Triosephosphate isomerase 2
437018	-	CDS	EGJ23858.1	LMOSA_12490	Triosephosphate isomerase 2
437134	-	CDS	EGJ23858.1	LMOSA_12490	Triosephosphate isomerase 2
437151	-	CDS	EGJ23858.1	LMOSA_12490	Triosephosphate isomerase 2
437253	-	CDS	EGJ23859.1	LMOSA_12500	Dihydroxyacetone kinase
437368	-	CDS	EGJ23859.1	LMOSA_12500	Dihydroxyacetone kinase
437412	-	CDS	EGJ23859.1	LMOSA_12500	Dihydroxyacetone kinase
441669	+	CDS	EGJ23866.1	LMOSA_12570	Internalin
441776	+	CDS	EGJ23866.1	LMOSA_12570	Internalin
441802	+	CDS	EGJ23866.1	LMOSA_12570	Internalin
441836	+	CDS	EGJ23866.1	LMOSA_12570	Internalin
441878	+	CDS	EGJ23866.1	LMOSA_12570	Internalin
441918	+	CDS	EGJ23866.1	LMOSA_12570	Internalin
441982	+	CDS	EGJ23866.1	LMOSA_12570	Internalin
459594	+	CDS	EGJ23883.1	LMOSA_12740	hypothetical protein
459685	+	CDS	EGJ23883.1	LMOSA_12740	hypothetical protein
459721	+	CDS	EGJ23883.1	LMOSA_12740	hypothetical protein
459777	+	CDS	EGJ23884.1	LMOSA_12750	HTH domain family
459790	+	CDS	EGJ23884.1	LMOSA_12750	HTH domain family
459850	+	CDS	EGJ23884.1	LMOSA_12750	HTH domain family
459953	+	CDS	EGJ23884.1	LMOSA_12750	HTH domain family
460024	+	CDS	EGJ23884.1	LMOSA_12750	HTH domain family
460172	+	CDS	EGJ23884.1	LMOSA_12750	HTH domain family
460180	+	CDS	EGJ23884.1	LMOSA_12750	HTH domain family
460207	+	CDS	EGJ23884.1	LMOSA_12750	HTH domain family
460246	+	CDS	EGJ23884.1	LMOSA_12750	HTH domain family
460384	+	CDS	EGJ23884.1	LMOSA_12750	HTH domain family
460405	+	CDS	EGJ23884.1	LMOSA_12750	HTH domain family
460467	+	CDS	EGJ23884.1	LMOSA_12750	HTH domain family
460661	+	CDS	EGJ23884.1	LMOSA_12750	HTH domain family
460688	+	intergenic region
460708	+	intergenic region
460717	+	intergenic region
460770	+	intergenic region
460877	+	CDS	EGJ23885.1	LMOSA_12760	hypothetical protein
460907	+	CDS	EGJ23885.1	LMOSA_12760	hypothetical protein
460922	+	CDS	EGJ23885.1	LMOSA_12760	hypothetical protein
460945	+	CDS	EGJ23885.1	LMOSA_12760	hypothetical protein
460986	+	CDS	EGJ23885.1	LMOSA_12760	hypothetical protein
461077	+	CDS	EGJ23885.1	LMOSA_12760	hypothetical protein
461160	+	CDS	EGJ23885.1	LMOSA_12760	hypothetical protein
461196	+	CDS	EGJ23885.1	LMOSA_12760	hypothetical protein
461204	+	intergenic region
461227	+	intergenic region
470474	+	intergenic region
470485	+	intergenic region
470499	+	CDS	EGJ23895.1	LMOSA_12860	hypothetical protein
470519	+	CDS	EGJ23895.1	LMOSA_12860	hypothetical protein
470569	+	CDS	EGJ23895.1	LMOSA_12860	hypothetical protein
470577	+	CDS	EGJ23895.1	LMOSA_12860	hypothetical protein
470616	+	CDS	EGJ23895.1	LMOSA_12860	hypothetical protein
470663	+	CDS	EGJ23895.1	LMOSA_12860	hypothetical protein
470677	+	CDS	EGJ23895.1	LMOSA_12860	hypothetical protein
470691	+	CDS	EGJ23895.1	LMOSA_12860	hypothetical protein
470717	+	CDS	EGJ23895.1	LMOSA_12860	hypothetical protein
470737	+	CDS	EGJ23895.1	LMOSA_12860	hypothetical protein
470789	+	CDS	EGJ23895.1	LMOSA_12860	hypothetical protein
470803	+	CDS	EGJ23896.1	LMOSA_12870	hypothetical protein
470824	+	CDS	EGJ23896.1	LMOSA_12870	hypothetical protein
470908	+	CDS	EGJ23896.1	LMOSA_12870	hypothetical protein
470988	+	CDS	EGJ23896.1	LMOSA_12870	hypothetical protein
471008	+	CDS	EGJ23896.1	LMOSA_12870	hypothetical protein
471039	+	CDS	EGJ23896.1	LMOSA_12870	hypothetical protein
471054	+	CDS	EGJ23896.1	LMOSA_12870	hypothetical protein
471066	+	CDS	EGJ23896.1	LMOSA_12870	hypothetical protein
471103	+	CDS	EGJ23896.1	LMOSA_12870	hypothetical protein
471140	+	CDS	EGJ23896.1	LMOSA_12870	hypothetical protein
471157	+	CDS	EGJ23896.1	LMOSA_12870	hypothetical protein
471226	+	CDS	EGJ23896.1	LMOSA_12870	hypothetical protein
471243	+	CDS	EGJ23896.1	LMOSA_12870	hypothetical protein
471364	+	CDS	EGJ23896.1	LMOSA_12870	hypothetical protein
471394	+	CDS	EGJ23896.1	LMOSA_12870	hypothetical protein
471450	+	CDS	EGJ23896.1	LMOSA_12870	hypothetical protein
471459	+	CDS	EGJ23896.1	LMOSA_12870	hypothetical protein
471501	+	CDS	EGJ23896.1	LMOSA_12870	hypothetical protein
471549	+	CDS	EGJ23896.1	LMOSA_12870	hypothetical protein
471561	+	CDS	EGJ23896.1	LMOSA_12870	hypothetical protein
471613	+	CDS	EGJ23896.1	LMOSA_12870	hypothetical protein
471643	+	CDS	EGJ23896.1	LMOSA_12870	hypothetical protein
471694	+	CDS	EGJ23896.1	LMOSA_12870	hypothetical protein
471707	+	CDS	EGJ23896.1	LMOSA_12870	hypothetical protein
471730	+	CDS	EGJ23896.1	LMOSA_12870	hypothetical protein
471754	+	intergenic region
471821	+	CDS	EGJ23897.1	LMOSA_12880	hypothetical protein
471868	+	CDS	EGJ23897.1	LMOSA_12880	hypothetical protein
471880	+	CDS	EGJ23897.1	LMOSA_12880	hypothetical protein
471892	+	CDS	EGJ23897.1	LMOSA_12880	hypothetical protein
471907	+	CDS	EGJ23897.1	LMOSA_12880	hypothetical protein
471926	+	CDS	EGJ23897.1	LMOSA_12880	hypothetical protein
471937	+	CDS	EGJ23897.1	LMOSA_12880	hypothetical protein
471948	+	CDS	EGJ23897.1	LMOSA_12880	hypothetical protein
471978	+	CDS	EGJ23897.1	LMOSA_12880	hypothetical protein
471991	+	CDS	EGJ23897.1	LMOSA_12880	hypothetical protein
472017	+	CDS	EGJ23897.1	LMOSA_12880	hypothetical protein
472035	+	CDS	EGJ23897.1	LMOSA_12880	hypothetical protein
472087	+	CDS	EGJ23897.1	LMOSA_12880	hypothetical protein
472150	+	CDS	EGJ23897.1	LMOSA_12880	hypothetical protein
472163	+	CDS	EGJ23897.1	LMOSA_12880	hypothetical protein
472181	+	CDS	EGJ23897.1	LMOSA_12880	hypothetical protein
472189	+	CDS	EGJ23897.1	LMOSA_12880	hypothetical protein
472217	+	CDS	EGJ23897.1	LMOSA_12880	hypothetical protein
488558	+	CDS	EGJ23916.1	LMOSA_13070	Phosphate transporter family protein
497456	+	CDS	EGJ23924.1	LMOSA_13150	hypothetical protein
497494	+	CDS	EGJ23924.1	LMOSA_13150	hypothetical protein
498718	+	intergenic region
498756	+	intergenic region
498837	+	CDS	EGJ23926.1	LMOSA_13170	Polysaccharide deacetylase family protein
498855	+	CDS	EGJ23926.1	LMOSA_13170	Polysaccharide deacetylase family protein
498873	+	CDS	EGJ23926.1	LMOSA_13170	Polysaccharide deacetylase family protein
498898	+	CDS	EGJ23926.1	LMOSA_13170	Polysaccharide deacetylase family protein
498953	+	CDS	EGJ23926.1	LMOSA_13170	Polysaccharide deacetylase family protein
498986	+	CDS	EGJ23926.1	LMOSA_13170	Polysaccharide deacetylase family protein
498995	+	CDS	EGJ23926.1	LMOSA_13170	Polysaccharide deacetylase family protein
499025	+	CDS	EGJ23926.1	LMOSA_13170	Polysaccharide deacetylase family protein
499122	+	CDS	EGJ23926.1	LMOSA_13170	Polysaccharide deacetylase family protein
499130	+	CDS	EGJ23926.1	LMOSA_13170	Polysaccharide deacetylase family protein
499161	+	CDS	EGJ23926.1	LMOSA_13170	Polysaccharide deacetylase family protein
499193	+	CDS	EGJ23926.1	LMOSA_13170	Polysaccharide deacetylase family protein
499216	+	CDS	EGJ23926.1	LMOSA_13170	Polysaccharide deacetylase family protein
499229	+	CDS	EGJ23926.1	LMOSA_13170	Polysaccharide deacetylase family protein
499308	+	CDS	EGJ23926.1	LMOSA_13170	Polysaccharide deacetylase family protein
499317	+	CDS	EGJ23926.1	LMOSA_13170	Polysaccharide deacetylase family protein
499392	+	CDS	EGJ23926.1	LMOSA_13170	Polysaccharide deacetylase family protein
499406	+	CDS	EGJ23926.1	LMOSA_13170	Polysaccharide deacetylase family protein
499427	+	CDS	EGJ23926.1	LMOSA_13170	Polysaccharide deacetylase family protein
499489	+	CDS	EGJ23926.1	LMOSA_13170	Polysaccharide deacetylase family protein
499500	+	CDS	EGJ23926.1	LMOSA_13170	Polysaccharide deacetylase family protein
499545	+	CDS	EGJ23926.1	LMOSA_13170	Polysaccharide deacetylase family protein
499556	+	CDS	EGJ23926.1	LMOSA_13170	Polysaccharide deacetylase family protein
499677	+	CDS	EGJ23926.1	LMOSA_13170	Polysaccharide deacetylase family protein
499705	+	CDS	EGJ23926.1	LMOSA_13170	Polysaccharide deacetylase family protein
499736	+	CDS	EGJ23926.1	LMOSA_13170	Polysaccharide deacetylase family protein
499766	+	CDS	EGJ23926.1	LMOSA_13170	Polysaccharide deacetylase family protein
499807	+	CDS	EGJ23926.1	LMOSA_13170	Polysaccharide deacetylase family protein
499827	+	CDS	EGJ23926.1	LMOSA_13170	Polysaccharide deacetylase family protein
499846	+	CDS	EGJ23926.1	LMOSA_13170	Polysaccharide deacetylase family protein
499882	+	CDS	EGJ23926.1	LMOSA_13170	Polysaccharide deacetylase family protein
499897	+	CDS	EGJ23926.1	LMOSA_13170	Polysaccharide deacetylase family protein
499918	+	CDS	EGJ23926.1	LMOSA_13170	Polysaccharide deacetylase family protein
499994	+	CDS	EGJ23926.1	LMOSA_13170	Polysaccharide deacetylase family protein
500085	+	CDS	EGJ23926.1	LMOSA_13170	Polysaccharide deacetylase family protein
500099	+	CDS	EGJ23926.1	LMOSA_13170	Polysaccharide deacetylase family protein
500124	+	CDS	EGJ23926.1	LMOSA_13170	Polysaccharide deacetylase family protein
500133	+	intergenic region
500144	+	intergenic region
500160	+	intergenic region
530034	+	intergenic region
530044	+	intergenic region
530082	+	intergenic region
530095	+	intergenic region
530167	+	intergenic region
530207	+	intergenic region
530257	+	intergenic region
530306	+	intergenic region
530319	+	intergenic region
530340	+	intergenic region
530353	+	intergenic region
530365	+	intergenic region
530414	+	intergenic region
530434	+	CDS	EGJ23958.1	LMOSA_13470	Internalin-A
530459	+	CDS	EGJ23958.1	LMOSA_13470	Internalin-A
530501	+	CDS	EGJ23958.1	LMOSA_13470	Internalin-A
530514	+	CDS	EGJ23958.1	LMOSA_13470	Internalin-A
530530	+	CDS	EGJ23958.1	LMOSA_13470	Internalin-A
530550	+	CDS	EGJ23958.1	LMOSA_13470	Internalin-A
530579	+	CDS	EGJ23958.1	LMOSA_13470	Internalin-A
530627	+	CDS	EGJ23958.1	LMOSA_13470	Internalin-A
530765	+	CDS	EGJ23958.1	LMOSA_13470	Internalin-A
530809	+	CDS	EGJ23958.1	LMOSA_13470	Internalin-A
530831	+	CDS	EGJ23958.1	LMOSA_13470	Internalin-A
530888	+	CDS	EGJ23958.1	LMOSA_13470	Internalin-A
530897	+	CDS	EGJ23958.1	LMOSA_13470	Internalin-A
531023	+	CDS	EGJ23958.1	LMOSA_13470	Internalin-A
531099	+	CDS	EGJ23958.1	LMOSA_13470	Internalin-A
531123	+	CDS	EGJ23958.1	LMOSA_13470	Internalin-A
531158	+	CDS	EGJ23958.1	LMOSA_13470	Internalin-A
531227	+	CDS	EGJ23958.1	LMOSA_13470	Internalin-A
531258	+	CDS	EGJ23958.1	LMOSA_13470	Internalin-A
531286	+	CDS	EGJ23958.1	LMOSA_13470	Internalin-A
531339	+	CDS	EGJ23958.1	LMOSA_13470	Internalin-A
531352	+	CDS	EGJ23958.1	LMOSA_13470	Internalin-A
531370	+	CDS	EGJ23958.1	LMOSA_13470	Internalin-A
531418	+	CDS	EGJ23958.1	LMOSA_13470	Internalin-A
531488	+	CDS	EGJ23958.1	LMOSA_13470	Internalin-A
531498	+	CDS	EGJ23958.1	LMOSA_13470	Internalin-A
531614	+	CDS	EGJ23958.1	LMOSA_13470	Internalin-A
531666	+	CDS	EGJ23958.1	LMOSA_13470	Internalin-A
531693	+	CDS	EGJ23958.1	LMOSA_13470	Internalin-A
531705	+	CDS	EGJ23958.1	LMOSA_13470	Internalin-A
531762	+	CDS	EGJ23958.1	LMOSA_13470	Internalin-A
531774	+	CDS	EGJ23958.1	LMOSA_13470	Internalin-A
531801	+	CDS	EGJ23958.1	LMOSA_13470	Internalin-A
531836	+	CDS	EGJ23958.1	LMOSA_13470	Internalin-A
531932	+	CDS	EGJ23958.1	LMOSA_13470	Internalin-A
531946	+	CDS	EGJ23958.1	LMOSA_13470	Internalin-A
531970	+	CDS	EGJ23958.1	LMOSA_13470	Internalin-A
532040	+	CDS	EGJ23958.1	LMOSA_13470	Internalin-A
532083	+	CDS	EGJ23958.1	LMOSA_13470	Internalin-A
532148	+	CDS	EGJ23958.1	LMOSA_13470	Internalin-A
532179	+	CDS	EGJ23958.1	LMOSA_13470	Internalin-A
532199	+	CDS	EGJ23958.1	LMOSA_13470	Internalin-A
532250	+	CDS	EGJ23958.1	LMOSA_13470	Internalin-A
532294	+	CDS	EGJ23958.1	LMOSA_13470	Internalin-A
532325	+	CDS	EGJ23958.1	LMOSA_13470	Internalin-A
532369	+	CDS	EGJ23958.1	LMOSA_13470	Internalin-A
532386	+	CDS	EGJ23958.1	LMOSA_13470	Internalin-A
532438	+	CDS	EGJ23958.1	LMOSA_13470	Internalin-A
532446	+	CDS	EGJ23958.1	LMOSA_13470	Internalin-A
532460	+	CDS	EGJ23958.1	LMOSA_13470	Internalin-A
532469	+	CDS	EGJ23958.1	LMOSA_13470	Internalin-A
532503	+	CDS	EGJ23958.1	LMOSA_13470	Internalin-A
532542	+	CDS	EGJ23958.1	LMOSA_13470	Internalin-A
532627	+	CDS	EGJ23958.1	LMOSA_13470	Internalin-A
532637	+	CDS	EGJ23958.1	LMOSA_13470	Internalin-A
532675	+	CDS	EGJ23958.1	LMOSA_13470	Internalin-A
532689	+	CDS	EGJ23958.1	LMOSA_13470	Internalin-A
532720	+	CDS	EGJ23958.1	LMOSA_13470	Internalin-A
532767	+	CDS	EGJ23958.1	LMOSA_13470	Internalin-A
532786	+	CDS	EGJ23958.1	LMOSA_13470	Internalin-A
532812	+	CDS	EGJ23958.1	LMOSA_13470	Internalin-A
532841	+	intergenic region
532853	+	intergenic region
542280	+	CDS	EGJ23967.1	LMOSA_13560	Cell envelope-related transcriptional attenuator domain protein
542340	+	CDS	EGJ23967.1	LMOSA_13560	Cell envelope-related transcriptional attenuator domain protein
542424	+	CDS	EGJ23967.1	LMOSA_13560	Cell envelope-related transcriptional attenuator domain protein
542433	+	CDS	EGJ23967.1	LMOSA_13560	Cell envelope-related transcriptional attenuator domain protein
542474	+	CDS	EGJ23967.1	LMOSA_13560	Cell envelope-related transcriptional attenuator domain protein
542547	+	CDS	EGJ23967.1	LMOSA_13560	Cell envelope-related transcriptional attenuator domain protein
542621	+	CDS	EGJ23967.1	LMOSA_13560	Cell envelope-related transcriptional attenuator domain protein
542655	+	CDS	EGJ23967.1	LMOSA_13560	Cell envelope-related transcriptional attenuator domain protein
542696	+	CDS	EGJ23967.1	LMOSA_13560	Cell envelope-related transcriptional attenuator domain protein
542710	+	intergenic region
562268	+	intergenic region
562283	+	intergenic region
562317	+	intergenic region
562436	+	intergenic region
562475	+	intergenic region
562500	+	CDS	EGJ23986.1	MOSA_13750
562694	+	intergenic region
562703	+	intergenic region
562730	+	intergenic region
562818	+	CDS	EGJ23987.1	MOSA_13760
562839	+	CDS	EGJ23987.1	MOSA_13760
562869	+	CDS	EGJ23987.1	MOSA_13760
562900	+	CDS	EGJ23987.1	MOSA_13760
562925	+	CDS	EGJ23987.1	MOSA_13760
562961	+	CDS	EGJ23987.1	MOSA_13760
562983	+	CDS	EGJ23987.1	MOSA_13760
562998	+	CDS	EGJ23987.1	MOSA_13760
563078	+	CDS	EGJ23987.1	MOSA_13760
563120	+	CDS	EGJ23987.1	MOSA_13760
563158	+	CDS	EGJ23987.1	MOSA_13760
563196	+	CDS	EGJ23987.1	MOSA_13760
563332	+	CDS	EGJ23987.1	MOSA_13760
563370	+	intergenic region
566446	+	intergenic region
566480	+	CDS	EGJ23993.1	MOSA_13810
566519	+	CDS	EGJ23993.1	MOSA_13810
566527	+	CDS	EGJ23993.1	MOSA_13810
566543	+	CDS	EGJ23993.1	MOSA_13810
566616	+	CDS	EGJ23993.1	MOSA_13810
566626	+	CDS	EGJ23993.1	MOSA_13810
566642	+	CDS	EGJ23993.1	MOSA_13810
566664	+	CDS	EGJ23993.1	MOSA_13810
566684	+	CDS	EGJ23993.1	MOSA_13810
566708	+	CDS	EGJ23993.1	MOSA_13810
566734	+	CDS	EGJ23993.1	MOSA_13810
566771	+	CDS	EGJ23993.1	MOSA_13810
566784	+	CDS	EGJ23993.1	MOSA_13810
566927	+	CDS	EGJ23993.1	MOSA_13810
566950	+	CDS	EGJ23993.1	MOSA_13810
566977	+	CDS	EGJ23993.1	MOSA_13810
567000	+	CDS	EGJ23993.1	MOSA_13810
567019	+	CDS	EGJ23993.1	MOSA_13810
567060	+	CDS	EGJ23993.1	MOSA_13810
567081	+	CDS	EGJ23993.1	MOSA_13810
567126	+	CDS	EGJ23993.1	MOSA_13810
567140	+	CDS	EGJ23993.1	MOSA_13810
567179	+	CDS	EGJ23993.1	MOSA_13810
567213	+	CDS	EGJ23993.1	MOSA_13810
567231	+	CDS	EGJ23993.1	MOSA_13810
567245	+	CDS	EGJ23993.1	MOSA_13810
567266	+	CDS	EGJ23993.1	MOSA_13810
567281	+	CDS	EGJ23993.1	MOSA_13810
567311	+	intergenic region
567325	+	CDS	EGJ23994.1	LMOSA_13820	hypothetical protein
567346	+	CDS	EGJ23994.1	LMOSA_13820	hypothetical protein
567434	+	CDS	EGJ23994.1	LMOSA_13820	hypothetical protein
567453	+	CDS	EGJ23994.1	LMOSA_13820	hypothetical protein
567468	+	CDS	EGJ23994.1	LMOSA_13820	hypothetical protein
567539	+	CDS	EGJ23994.1	LMOSA_13820	hypothetical protein
567554	+	CDS	EGJ23994.1	LMOSA_13820	hypothetical protein
567576	+	CDS	EGJ23994.1	LMOSA_13820	hypothetical protein
567588	+	CDS	EGJ23994.1	LMOSA_13820	hypothetical protein
567638	+	CDS	EGJ23994.1	LMOSA_13820	hypothetical protein
567649	+	CDS	EGJ23994.1	LMOSA_13820	hypothetical protein
567671	+	CDS	EGJ23994.1	LMOSA_13820	hypothetical protein
567695	+	intergenic region
567703	+	intergenic region
567711	+	intergenic region
570184	+	CDS	EGJ23996.1	LMOSA_13840	67 kDa myosin-cross-reactive antigen family protein
570199	+	CDS	EGJ23996.1	LMOSA_13840	67 kDa myosin-cross-reactive antigen family protein
570339	+	CDS	EGJ23996.1	LMOSA_13840	67 kDa myosin-cross-reactive antigen family protein
570350	+	CDS	EGJ23996.1	LMOSA_13840	67 kDa myosin-cross-reactive antigen family protein
570373	+	CDS	EGJ23996.1	LMOSA_13840	67 kDa myosin-cross-reactive antigen family protein
575803	+	CDS	EGJ24004.1	LMOSA_13920	50S ribosomal protein L32
575840	+	CDS	EGJ24004.1	LMOSA_13920	50S ribosomal protein L32
575853	+	CDS	EGJ24004.1	LMOSA_13920	50S ribosomal protein L32
575915	+	CDS	EGJ24004.1	LMOSA_13920	50S ribosomal protein L32
575937	+	CDS	EGJ24004.1	LMOSA_13920	50S ribosomal protein L32
575947	+	CDS	EGJ24004.1	LMOSA_13920	50S ribosomal protein L32
601913	+	CDS	EGJ24032.1	LMOSA_14200	Universal stress protein family
601973	+	CDS	EGJ24032.1	LMOSA_14200	Universal stress protein family
602049	+	CDS	EGJ24032.1	LMOSA_14200	Universal stress protein family
602107	+	CDS	EGJ24032.1	LMOSA_14200	Universal stress protein family
602183	+	CDS	EGJ24032.1	LMOSA_14200	Universal stress protein family
602214	+	CDS	EGJ24032.1	LMOSA_14200	Universal stress protein family
602222	+	CDS	EGJ24032.1	LMOSA_14200	Universal stress protein family
602234	+	CDS	EGJ24032.1	LMOSA_14200	Universal stress protein family
602250	+	CDS	EGJ24032.1	LMOSA_14200	Universal stress protein family
602304	+	CDS	EGJ24032.1	LMOSA_14200	Universal stress protein family
602320	+	intergenic region
602332	+	intergenic region
612337	-	CDS	EGJ24041.1	LMOSA_14290	Sulfate transporter family protein
612517	-	CDS	EGJ24041.1	LMOSA_14290	Sulfate transporter family protein
612624	-	CDS	EGJ24041.1	LMOSA_14290	Sulfate transporter family protein
624036	-	CDS	EGJ24051.1	LMOSA_14390	Transcriptional regulator
624191	-	CDS	EGJ24051.1	LMOSA_14390	Transcriptional regulator
624273	-	CDS	EGJ24051.1	LMOSA_14390	Transcriptional regulator
624307	-	CDS	EGJ24051.1	LMOSA_14390	Transcriptional regulator
628568	-	intergenic region
628599	-	CDS	EGJ24055.1	LMOSA_14430	Tagatose 1%2C6-diphosphate aldolase 2
628623	-	CDS	EGJ24055.1	LMOSA_14430	Tagatose 1%2C6-diphosphate aldolase 2
628642	-	CDS	EGJ24055.1	LMOSA_14430	Tagatose 1%2C6-diphosphate aldolase 2
628713	-	CDS	EGJ24055.1	LMOSA_14430	Tagatose 1%2C6-diphosphate aldolase 2
628725	-	CDS	EGJ24055.1	LMOSA_14430	Tagatose 1%2C6-diphosphate aldolase 2
628906	-	CDS	EGJ24055.1	LMOSA_14430	Tagatose 1%2C6-diphosphate aldolase 2
628924	-	CDS	EGJ24055.1	LMOSA_14430	Tagatose 1%2C6-diphosphate aldolase 2
628934	-	CDS	EGJ24055.1	LMOSA_14430	Tagatose 1%2C6-diphosphate aldolase 2
628946	-	CDS	EGJ24055.1	LMOSA_14430	Tagatose 1%2C6-diphosphate aldolase 2
628985	-	CDS	EGJ24055.1	LMOSA_14430	Tagatose 1%2C6-diphosphate aldolase 2
629031	-	CDS	EGJ24055.1	LMOSA_14430	Tagatose 1%2C6-diphosphate aldolase 2
629088	-	CDS	EGJ24055.1	LMOSA_14430	Tagatose 1%2C6-diphosphate aldolase 2
629120	-	CDS	EGJ24055.1	LMOSA_14430	Tagatose 1%2C6-diphosphate aldolase 2
629135	-	CDS	EGJ24055.1	LMOSA_14430	Tagatose 1%2C6-diphosphate aldolase 2
629173	-	CDS	EGJ24055.1	LMOSA_14430	Tagatose 1%2C6-diphosphate aldolase 2
629192	-	CDS	EGJ24055.1	LMOSA_14430	Tagatose 1%2C6-diphosphate aldolase 2
629200	-	CDS	EGJ24055.1	LMOSA_14430	Tagatose 1%2C6-diphosphate aldolase 2
629287	-	CDS	EGJ24055.1	LMOSA_14430	Tagatose 1%2C6-diphosphate aldolase 2
629316	-	CDS	EGJ24055.1	LMOSA_14430	Tagatose 1%2C6-diphosphate aldolase 2
629343	-	CDS	EGJ24055.1	LMOSA_14430	Tagatose 1%2C6-diphosphate aldolase 2
629472	-	CDS	EGJ24055.1	LMOSA_14430	Tagatose 1%2C6-diphosphate aldolase 2
629483	-	CDS	EGJ24055.1	LMOSA_14430	Tagatose 1%2C6-diphosphate aldolase 2
629576	-	CDS	EGJ24055.1	LMOSA_14430	Tagatose 1%2C6-diphosphate aldolase 2
629596	-	intergenic region
629610	-	intergenic region
629763	+	intergenic region
629786	+	intergenic region
629824	+	intergenic region
629862	+	intergenic region
629870	+	intergenic region
629921	+	CDS	EGJ24056.1	LMOSA_14440	Beta-lactamase
629938	+	CDS	EGJ24056.1	LMOSA_14440	Beta-lactamase
629975	+	CDS	EGJ24056.1	LMOSA_14440	Beta-lactamase
630002	+	CDS	EGJ24056.1	LMOSA_14440	Beta-lactamase
630021	+	CDS	EGJ24056.1	LMOSA_14440	Beta-lactamase
630037	+	CDS	EGJ24056.1	LMOSA_14440	Beta-lactamase
630059	+	CDS	EGJ24056.1	LMOSA_14440	Beta-lactamase
630168	+	CDS	EGJ24056.1	LMOSA_14440	Beta-lactamase
630245	+	CDS	EGJ24056.1	LMOSA_14440	Beta-lactamase
630278	+	CDS	EGJ24056.1	LMOSA_14440	Beta-lactamase
630303	+	CDS	EGJ24056.1	LMOSA_14440	Beta-lactamase
630386	+	CDS	EGJ24056.1	LMOSA_14440	Beta-lactamase
630396	+	CDS	EGJ24056.1	LMOSA_14440	Beta-lactamase
630412	+	CDS	EGJ24056.1	LMOSA_14440	Beta-lactamase
630425	+	CDS	EGJ24056.1	LMOSA_14440	Beta-lactamase
630464	+	CDS	EGJ24056.1	LMOSA_14440	Beta-lactamase
630494	+	CDS	EGJ24056.1	LMOSA_14440	Beta-lactamase
630528	+	CDS	EGJ24056.1	LMOSA_14440	Beta-lactamase
630539	+	CDS	EGJ24056.1	LMOSA_14440	Beta-lactamase
630549	+	CDS	EGJ24056.1	LMOSA_14440	Beta-lactamase
630623	+	CDS	EGJ24056.1	LMOSA_14440	Beta-lactamase
630659	+	CDS	EGJ24056.1	LMOSA_14440	Beta-lactamase
630677	+	CDS	EGJ24056.1	LMOSA_14440	Beta-lactamase
630715	+	CDS	EGJ24056.1	LMOSA_14440	Beta-lactamase
630758	+	CDS	EGJ24056.1	LMOSA_14440	Beta-lactamase
630773	+	CDS	EGJ24056.1	LMOSA_14440	Beta-lactamase
630820	+	CDS	EGJ24056.1	LMOSA_14440	Beta-lactamase
630845	+	CDS	EGJ24056.1	LMOSA_14440	Beta-lactamase
630884	+	CDS	EGJ24056.1	LMOSA_14440	Beta-lactamase
630900	+	CDS	EGJ24056.1	LMOSA_14440	Beta-lactamase
630924	+	CDS	EGJ24056.1	LMOSA_14440	Beta-lactamase
642375	-	CDS	EGJ24069.1	LMOSA_14570	CBS domain-containing protein
642384	-	CDS	EGJ24069.1	LMOSA_14570	CBS domain-containing protein
642433	-	CDS	EGJ24069.1	LMOSA_14570	CBS domain-containing protein
642515	-	CDS	EGJ24069.1	LMOSA_14570	CBS domain-containing protein
642582	-	CDS	EGJ24069.1	LMOSA_14570	CBS domain-containing protein
642590	-	CDS	EGJ24069.1	LMOSA_14570	CBS domain-containing protein
642639	-	CDS	EGJ24069.1	LMOSA_14570	CBS domain-containing protein
642668	-	CDS	EGJ24069.1	LMOSA_14570	CBS domain-containing protein
642700	-	CDS	EGJ24069.1	LMOSA_14570	CBS domain-containing protein
642743	-	CDS	EGJ24069.1	LMOSA_14570	CBS domain-containing protein
642778	-	CDS	EGJ24069.1	LMOSA_14570	CBS domain-containing protein
642803	-	CDS	EGJ24069.1	LMOSA_14570	CBS domain-containing protein
642819	-	CDS	EGJ24069.1	LMOSA_14570	CBS domain-containing protein
642888	-	CDS	EGJ24069.1	LMOSA_14570	CBS domain-containing protein
643003	-	CDS	EGJ24069.1	LMOSA_14570	CBS domain-containing protein
643015	-	CDS	EGJ24069.1	LMOSA_14570	CBS domain-containing protein
643373	+	CDS	EGJ24070.1	LMOSA_14580	Alcohol dehydrogenase YqhD
648791	+	intergenic region
648859	+	intergenic region
648867	+	intergenic region
648911	+	intergenic region
648924	+	intergenic region
651578	-	intergenic region
651602	-	intergenic region
651610	-	intergenic region
651670	-	intergenic region
664694	+	intergenic region
664734	+	intergenic region
664758	+	intergenic region
664818	+	CDS	EGJ24092.1	MOSA_14790
664851	+	CDS	EGJ24092.1	MOSA_14790
664896	+	CDS	EGJ24092.1	MOSA_14790
664908	+	CDS	EGJ24092.1	MOSA_14790
664940	+	CDS	EGJ24092.1	MOSA_14790
665067	+	CDS	EGJ24092.1	MOSA_14790
665089	+	CDS	EGJ24092.1	MOSA_14790
665127	+	CDS	EGJ24092.1	MOSA_14790
665174	+	CDS	EGJ24092.1	MOSA_14790
665425	+	CDS	EGJ24092.1	MOSA_14790
665492	+	CDS	EGJ24092.1	MOSA_14790
665518	+	CDS	EGJ24092.1	MOSA_14790
665590	+	CDS	EGJ24092.1	MOSA_14790
665620	+	CDS	EGJ24092.1	MOSA_14790
665650	+	CDS	EGJ24092.1	MOSA_14790
666099	+	CDS	EGJ24092.1	MOSA_14790
666113	+	CDS	EGJ24092.1	MOSA_14790
666148	+	CDS	EGJ24092.1	MOSA_14790
666201	+	CDS	EGJ24092.1	MOSA_14790
666257	+	CDS	EGJ24092.1	MOSA_14790
666284	+	intergenic region
666296	+	intergenic region
667710	+	intergenic region
667789	+	CDS	EGJ24095.1	LMOSA_14820	hypothetical protein
667854	+	CDS	EGJ24095.1	LMOSA_14820	hypothetical protein
667896	+	CDS	EGJ24095.1	LMOSA_14820	hypothetical protein
667905	+	CDS	EGJ24095.1	LMOSA_14820	hypothetical protein
667987	+	CDS	EGJ24096.1	LMOSA_14830	Phospholipase/carboxylesterase family protein
667995	+	CDS	EGJ24096.1	LMOSA_14830	Phospholipase/carboxylesterase family protein
668198	+	CDS	EGJ24096.1	LMOSA_14830	Phospholipase/carboxylesterase family protein
668245	+	CDS	EGJ24096.1	LMOSA_14830	Phospholipase/carboxylesterase family protein
668374	+	CDS	EGJ24096.1	LMOSA_14830	Phospholipase/carboxylesterase family protein
669888	-	intergenic region
669905	-	intergenic region
670082	-	CDS	EGJ24098.1	LMOSA_14850	Protein p60
670203	-	CDS	EGJ24098.1	LMOSA_14850	Protein p60
670327	-	CDS	EGJ24098.1	LMOSA_14850	Protein p60
670367	-	CDS	EGJ24098.1	LMOSA_14850	Protein p60
670388	-	CDS	EGJ24098.1	LMOSA_14850	Protein p60
670492	-	CDS	EGJ24098.1	LMOSA_14850	Protein p60
670546	-	CDS	EGJ24098.1	LMOSA_14850	Protein p60
670590	-	CDS	EGJ24098.1	LMOSA_14850	Protein p60
670636	-	CDS	EGJ24098.1	LMOSA_14850	Protein p60
670793	-	CDS	EGJ24098.1	LMOSA_14850	Protein p60
670830	-	CDS	EGJ24098.1	LMOSA_14850	Protein p60
670883	-	CDS	EGJ24098.1	LMOSA_14850	Protein p60
670915	-	CDS	EGJ24098.1	LMOSA_14850	Protein p60
671016	-	CDS	EGJ24098.1	LMOSA_14850	Protein p60
671152	-	CDS	EGJ24098.1	LMOSA_14850	Protein p60
671167	-	CDS	EGJ24098.1	LMOSA_14850	Protein p60
671187	-	CDS	EGJ24098.1	LMOSA_14850	Protein p60
671216	-	CDS	EGJ24098.1	LMOSA_14850	Protein p60
671227	-	CDS	EGJ24098.1	LMOSA_14850	Protein p60
671249	-	CDS	EGJ24098.1	LMOSA_14850	Protein p60
671299	-	CDS	EGJ24098.1	LMOSA_14850	Protein p60
674205	+	intergenic region
674306	+	CDS	EGJ24100.1	LMOSA_14870	Membrane protein YubA
674316	+	CDS	EGJ24100.1	LMOSA_14870	Membrane protein YubA
674525	+	CDS	EGJ24100.1	LMOSA_14870	Membrane protein YubA
674592	+	CDS	EGJ24100.1	LMOSA_14870	Membrane protein YubA
674649	+	CDS	EGJ24100.1	LMOSA_14870	Membrane protein YubA
674871	+	CDS	EGJ24100.1	LMOSA_14870	Membrane protein YubA
675130	+	CDS	EGJ24100.1	LMOSA_14870	Membrane protein YubA
675173	+	CDS	EGJ24100.1	LMOSA_14870	Membrane protein YubA
675228	+	CDS	EGJ24100.1	LMOSA_14870	Membrane protein YubA
675351	+	CDS	EGJ24100.1	LMOSA_14870	Membrane protein YubA
675381	+	CDS	EGJ24100.1	LMOSA_14870	Membrane protein YubA
675402	+	intergenic region
685423	+	intergenic region
685439	+	CDS	EGJ24109.1	LMOSA_14960	Formate/nitrite transporter family protein
685479	+	CDS	EGJ24109.1	LMOSA_14960	Formate/nitrite transporter family protein
685496	+	CDS	EGJ24109.1	LMOSA_14960	Formate/nitrite transporter family protein
685589	+	CDS	EGJ24109.1	LMOSA_14960	Formate/nitrite transporter family protein
685610	+	CDS	EGJ24109.1	LMOSA_14960	Formate/nitrite transporter family protein
685701	+	CDS	EGJ24109.1	LMOSA_14960	Formate/nitrite transporter family protein
685815	+	CDS	EGJ24109.1	LMOSA_14960	Formate/nitrite transporter family protein
689089	+	intergenic region
689176	+	CDS	EGJ24112.1	LMOSA_14990	Membrane protein
689324	+	CDS	EGJ24112.1	LMOSA_14990	Membrane protein
689560	+	CDS	EGJ24112.1	LMOSA_14990	Membrane protein
689642	+	CDS	EGJ24112.1	LMOSA_14990	Membrane protein
690059	-	CDS	EGJ24113.1	LMOSA_15000	Cyclic nucleotide-binding protein
690076	-	CDS	EGJ24113.1	LMOSA_15000	Cyclic nucleotide-binding protein
692100	+	CDS	EGJ24116.1	LMOSA_15030	hypothetical protein
692147	+	CDS	EGJ24116.1	LMOSA_15030	hypothetical protein
692179	+	CDS	EGJ24117.1	LMOSA_15040	hypothetical protein
692244	+	CDS	EGJ24117.1	LMOSA_15040	hypothetical protein
692262	+	CDS	EGJ24117.1	LMOSA_15040	hypothetical protein
692310	+	CDS	EGJ24117.1	LMOSA_15040	hypothetical protein
692345	+	CDS	EGJ24117.1	LMOSA_15040	hypothetical protein
692365	+	CDS	EGJ24117.1	LMOSA_15040	hypothetical protein
692442	+	CDS	EGJ24117.1	LMOSA_15040	hypothetical protein
692454	+	CDS	EGJ24117.1	LMOSA_15040	hypothetical protein
692465	+	CDS	EGJ24117.1	LMOSA_15040	hypothetical protein
692488	+	CDS	EGJ24117.1	LMOSA_15040	hypothetical protein
692501	+	CDS	EGJ24117.1	LMOSA_15040	hypothetical protein
692539	+	CDS	EGJ24117.1	LMOSA_15040	hypothetical protein
692562	+	CDS	EGJ24117.1	LMOSA_15040	hypothetical protein
692607	+	CDS	EGJ24117.1	LMOSA_15040	hypothetical protein
692630	+	CDS	EGJ24117.1	LMOSA_15040	hypothetical protein
692639	+	CDS	EGJ24117.1	LMOSA_15040	hypothetical protein
692674	+	CDS	EGJ24117.1	LMOSA_15040	hypothetical protein
692742	+	CDS	EGJ24117.1	LMOSA_15040	hypothetical protein
692776	+	CDS	EGJ24117.1	LMOSA_15040	hypothetical protein
692808	+	CDS	EGJ24117.1	LMOSA_15040	hypothetical protein
692822	+	CDS	EGJ24117.1	LMOSA_15040	hypothetical protein
692854	+	CDS	EGJ24117.1	LMOSA_15040	hypothetical protein
692955	+	CDS	EGJ24117.1	LMOSA_15040	hypothetical protein
692970	+	CDS	EGJ24117.1	LMOSA_15040	hypothetical protein
693027	+	CDS	EGJ24117.1	LMOSA_15040	hypothetical protein
693102	+	CDS	EGJ24117.1	LMOSA_15040	hypothetical protein
693217	+	CDS	EGJ24117.1	LMOSA_15040	hypothetical protein
693258	+	CDS	EGJ24117.1	LMOSA_15040	hypothetical protein
693267	+	intergenic region
693388	+	CDS	EGJ24118.1	LMOSA_15050	Acetyltransferase
693405	+	CDS	EGJ24118.1	LMOSA_15050	Acetyltransferase
693469	+	CDS	EGJ24118.1	LMOSA_15050	Acetyltransferase
693603	+	CDS	EGJ24118.1	LMOSA_15050	Acetyltransferase
693677	+	CDS	EGJ24118.1	LMOSA_15050	Acetyltransferase
693699	+	CDS	EGJ24118.1	LMOSA_15050	Acetyltransferase
693856	+	CDS	EGJ24118.1	LMOSA_15050	Acetyltransferase
694322	-	intergenic region
694358	-	CDS	EGJ24120.1	LMOSA_15070	hypothetical protein
694377	-	CDS	EGJ24120.1	LMOSA_15070	hypothetical protein
694502	-	CDS	EGJ24120.1	LMOSA_15070	hypothetical protein
694511	-	CDS	EGJ24120.1	LMOSA_15070	hypothetical protein
694555	-	CDS	EGJ24120.1	LMOSA_15070	hypothetical protein
694577	-	CDS	EGJ24120.1	LMOSA_15070	hypothetical protein
694595	-	CDS	EGJ24120.1	LMOSA_15070	hypothetical protein
694603	-	CDS	EGJ24120.1	LMOSA_15070	hypothetical protein
694617	-	CDS	EGJ24120.1	LMOSA_15070	hypothetical protein
694690	-	CDS	EGJ24120.1	LMOSA_15070	hypothetical protein
694703	-	intergenic region
700112	+	CDS	EGJ24124.1	LMOSA_15110	ABC transporter
700177	+	CDS	EGJ24124.1	LMOSA_15110	ABC transporter
700262	+	CDS	EGJ24124.1	LMOSA_15110	ABC transporter
700281	+	CDS	EGJ24124.1	LMOSA_15110	ABC transporter
700316	+	CDS	EGJ24124.1	LMOSA_15110	ABC transporter
700357	+	CDS	EGJ24124.1	LMOSA_15110	ABC transporter
700477	+	CDS	EGJ24125.1	LMOSA_15120	Rhodanese-like domain protein
700545	+	CDS	EGJ24125.1	LMOSA_15120	Rhodanese-like domain protein
700568	+	CDS	EGJ24125.1	LMOSA_15120	Rhodanese-like domain protein
700625	+	CDS	EGJ24125.1	LMOSA_15120	Rhodanese-like domain protein
700703	+	CDS	EGJ24125.1	LMOSA_15120	Rhodanese-like domain protein
700743	+	CDS	EGJ24125.1	LMOSA_15120	Rhodanese-like domain protein
700764	+	CDS	EGJ24125.1	LMOSA_15120	Rhodanese-like domain protein
700774	+	CDS	EGJ24125.1	LMOSA_15120	Rhodanese-like domain protein
700783	+	intergenic region
700820	-	CDS	EGJ24126.1	LMOSA_15130	LRR-and LPXTG-motif protein
700956	-	CDS	EGJ24126.1	LMOSA_15130	LRR-and LPXTG-motif protein
700986	-	CDS	EGJ24126.1	LMOSA_15130	LRR-and LPXTG-motif protein
701041	-	CDS	EGJ24126.1	LMOSA_15130	LRR-and LPXTG-motif protein
701083	-	CDS	EGJ24126.1	LMOSA_15130	LRR-and LPXTG-motif protein
701136	-	CDS	EGJ24126.1	LMOSA_15130	LRR-and LPXTG-motif protein
701239	-	CDS	EGJ24126.1	LMOSA_15130	LRR-and LPXTG-motif protein
701259	-	CDS	EGJ24126.1	LMOSA_15130	LRR-and LPXTG-motif protein
701274	-	CDS	EGJ24126.1	LMOSA_15130	LRR-and LPXTG-motif protein
701293	-	CDS	EGJ24126.1	LMOSA_15130	LRR-and LPXTG-motif protein
701457	-	CDS	EGJ24126.1	LMOSA_15130	LRR-and LPXTG-motif protein
701468	-	CDS	EGJ24126.1	LMOSA_15130	LRR-and LPXTG-motif protein
701516	-	CDS	EGJ24126.1	LMOSA_15130	LRR-and LPXTG-motif protein
701578	-	CDS	EGJ24126.1	LMOSA_15130	LRR-and LPXTG-motif protein
701628	-	CDS	EGJ24126.1	LMOSA_15130	LRR-and LPXTG-motif protein
701669	-	CDS	EGJ24126.1	LMOSA_15130	LRR-and LPXTG-motif protein
701826	-	CDS	EGJ24126.1	LMOSA_15130	LRR-and LPXTG-motif protein
701877	-	CDS	EGJ24126.1	LMOSA_15130	LRR-and LPXTG-motif protein
701922	-	CDS	EGJ24126.1	LMOSA_15130	LRR-and LPXTG-motif protein
702080	-	CDS	EGJ24126.1	LMOSA_15130	LRR-and LPXTG-motif protein
702108	-	CDS	EGJ24126.1	LMOSA_15130	LRR-and LPXTG-motif protein
702273	-	CDS	EGJ24126.1	LMOSA_15130	LRR-and LPXTG-motif protein
702354	-	CDS	EGJ24126.1	LMOSA_15130	LRR-and LPXTG-motif protein
702386	-	CDS	EGJ24126.1	LMOSA_15130	LRR-and LPXTG-motif protein
702422	-	CDS	EGJ24126.1	LMOSA_15130	LRR-and LPXTG-motif protein
702450	-	CDS	EGJ24126.1	LMOSA_15130	LRR-and LPXTG-motif protein
702475	-	CDS	EGJ24126.1	LMOSA_15130	LRR-and LPXTG-motif protein
702489	-	CDS	EGJ24126.1	LMOSA_15130	LRR-and LPXTG-motif protein
702591	-	intergenic region
704311	+	CDS	EGJ24129.1	LMOSA_15160	Oxidoreductase%2C zinc-binding
711664	+	CDS	EGJ24138.1	LMOSA_15250	hypothetical protein
711904	+	CDS	EGJ24138.1	LMOSA_15250	hypothetical protein
711936	-	intergenic region
711955	-	CDS	EGJ24139.1	LMOSA_15260	Acetyltransferase
712070	-	CDS	EGJ24139.1	LMOSA_15260	Acetyltransferase
712082	-	CDS	EGJ24139.1	LMOSA_15260	Acetyltransferase
712179	-	CDS	EGJ24139.1	LMOSA_15260	Acetyltransferase
712215	-	CDS	EGJ24139.1	LMOSA_15260	Acetyltransferase
712295	-	CDS	EGJ24139.1	LMOSA_15260	Acetyltransferase
712306	-	CDS	EGJ24139.1	LMOSA_15260	Acetyltransferase
712329	-	CDS	EGJ24139.1	LMOSA_15260	Acetyltransferase
712342	-	CDS	EGJ24139.1	LMOSA_15260	Acetyltransferase
712449	-	CDS	EGJ24140.1	LMOSA_15270	Lipase/acylhydrolase
712641	-	CDS	EGJ24140.1	LMOSA_15270	Lipase/acylhydrolase
712755	-	CDS	EGJ24140.1	LMOSA_15270	Lipase/acylhydrolase
712853	-	CDS	EGJ24140.1	LMOSA_15270	Lipase/acylhydrolase
712943	-	CDS	EGJ24140.1	LMOSA_15270	Lipase/acylhydrolase
712968	-	CDS	EGJ24140.1	LMOSA_15270	Lipase/acylhydrolase
713077	-	CDS	EGJ24140.1	LMOSA_15270	Lipase/acylhydrolase
713087	-	CDS	EGJ24140.1	LMOSA_15270	Lipase/acylhydrolase
713097	-	CDS	EGJ24140.1	LMOSA_15270	Lipase/acylhydrolase
714688	-	CDS	EGJ24141.1	LMOSA_15280	Membrane protein
729061	+	CDS	EGJ24153.1	MOSA_15400
729152	+	CDS	EGJ24153.1	MOSA_15400
729203	+	CDS	EGJ24153.1	MOSA_15400
729239	+	CDS	EGJ24153.1	MOSA_15400
729310	+	CDS	EGJ24153.1	MOSA_15400
729377	+	CDS	EGJ24153.1	MOSA_15400
729436	+	CDS	EGJ24153.1	MOSA_15400
729468	+	CDS	EGJ24153.1	MOSA_15400
729505	+	CDS	EGJ24153.1	MOSA_15400
729519	+	CDS	EGJ24153.1	MOSA_15400
729535	+	CDS	EGJ24153.1	MOSA_15400
729570	+	CDS	EGJ24153.1	MOSA_15400
729623	+	CDS	EGJ24153.1	MOSA_15400
729716	+	intergenic region
729728	+	intergenic region
729743	+	CDS	EGJ24154.1	MOSA_15410
729777	+	CDS	EGJ24154.1	MOSA_15410
729802	+	CDS	EGJ24154.1	MOSA_15410
729825	+	CDS	EGJ24154.1	MOSA_15410
729874	+	CDS	EGJ24154.1	MOSA_15410
729887	+	CDS	EGJ24154.1	MOSA_15410
729895	+	CDS	EGJ24154.1	MOSA_15410
729924	+	CDS	EGJ24154.1	MOSA_15410
729932	+	intergenic region
729942	+	intergenic region
731121	+	CDS	EGJ24156.1	LMOSA_15430	hypothetical oxidoreductase
731151	+	CDS	EGJ24156.1	LMOSA_15430	hypothetical oxidoreductase
731264	+	CDS	EGJ24156.1	LMOSA_15430	hypothetical oxidoreductase
731359	+	CDS	EGJ24156.1	LMOSA_15430	hypothetical oxidoreductase
731395	+	CDS	EGJ24156.1	LMOSA_15430	hypothetical oxidoreductase
731420	+	CDS	EGJ24156.1	LMOSA_15430	hypothetical oxidoreductase
731501	+	CDS	EGJ24156.1	LMOSA_15430	hypothetical oxidoreductase
731658	+	CDS	EGJ24156.1	LMOSA_15430	hypothetical oxidoreductase
731688	+	CDS	EGJ24156.1	LMOSA_15430	hypothetical oxidoreductase
740207	-	intergenic region
740226	-	intergenic region
740250	-	CDS	EGJ24163.1	LMOSA_15500	hypothetical protein
740324	+	CDS	EGJ24163.1	LMOSA_15500	hypothetical protein
740357	-	CDS	EGJ24163.1	LMOSA_15500	hypothetical protein
740432	+	CDS	EGJ24163.1	LMOSA_15500	hypothetical protein
740445	-	CDS	EGJ24163.1	LMOSA_15500	hypothetical protein
740445	-	CDS	EGJ24163.1	LMOSA_15500	hypothetical protein
740462	+	CDS	EGJ24163.1	LMOSA_15500	hypothetical protein
740474	+	CDS	EGJ24163.1	LMOSA_15500	hypothetical protein
740532	-	intergenic region
740606	+	intergenic region
740616	-	intergenic region
740622	+	CDS	EGJ24164.1	LMOSA_15510	Magnesium transporter
740734	+	CDS	EGJ24164.1	LMOSA_15510	Magnesium transporter
740752	-	CDS	EGJ24164.1	LMOSA_15510	Magnesium transporter
740770	+	CDS	EGJ24164.1	LMOSA_15510	Magnesium transporter
740786	+	CDS	EGJ24164.1	LMOSA_15510	Magnesium transporter
740826	+	CDS	EGJ24164.1	LMOSA_15510	Magnesium transporter
740849	+	CDS	EGJ24164.1	LMOSA_15510	Magnesium transporter
740872	+	CDS	EGJ24164.1	LMOSA_15510	Magnesium transporter
740953	+	CDS	EGJ24164.1	LMOSA_15510	Magnesium transporter
740993	+	CDS	EGJ24164.1	LMOSA_15510	Magnesium transporter
741112	+	CDS	EGJ24164.1	LMOSA_15510	Magnesium transporter
741184	+	CDS	EGJ24164.1	LMOSA_15510	Magnesium transporter
746190	-	intergenic region
746199	-	CDS	EGJ24169.1	LMOSA_15560	hypothetical protein
746230	-	CDS	EGJ24169.1	LMOSA_15560	hypothetical protein
746247	-	CDS	EGJ24169.1	LMOSA_15560	hypothetical protein
746264	-	CDS	EGJ24169.1	LMOSA_15560	hypothetical protein
746322	-	CDS	EGJ24169.1	LMOSA_15560	hypothetical protein
746375	-	CDS	EGJ24169.1	LMOSA_15560	hypothetical protein
746387	-	CDS	EGJ24169.1	LMOSA_15560	hypothetical protein
746415	-	CDS	EGJ24169.1	LMOSA_15560	hypothetical protein
746541	-	CDS	EGJ24169.1	LMOSA_15560	hypothetical protein
746607	-	CDS	EGJ24169.1	LMOSA_15560	hypothetical protein
746752	-	CDS	EGJ24169.1	LMOSA_15560	hypothetical protein
746779	-	CDS	EGJ24169.1	LMOSA_15560	hypothetical protein
746802	-	CDS	EGJ24169.1	LMOSA_15560	hypothetical protein
746851	-	CDS	EGJ24169.1	LMOSA_15560	hypothetical protein
746918	-	CDS	EGJ24169.1	LMOSA_15560	hypothetical protein
746954	-	CDS	EGJ24169.1	LMOSA_15560	hypothetical protein
746995	-	CDS	EGJ24169.1	LMOSA_15560	hypothetical protein
747179	-	CDS	EGJ24169.1	LMOSA_15560	hypothetical protein
747369	+	CDS	EGJ24170.1	LMOSA_15570	hypothetical protein
747397	+	CDS	EGJ24170.1	LMOSA_15570	hypothetical protein
747443	+	CDS	EGJ24170.1	LMOSA_15570	hypothetical protein
747461	+	CDS	EGJ24170.1	LMOSA_15570	hypothetical protein
747503	+	CDS	EGJ24170.1	LMOSA_15570	hypothetical protein
747553	+	CDS	EGJ24170.1	LMOSA_15570	hypothetical protein
747561	+	CDS	EGJ24170.1	LMOSA_15570	hypothetical protein
747576	+	CDS	EGJ24170.1	LMOSA_15570	hypothetical protein
754536	+	CDS	EGJ24178.1	MOSA_15640
754551	+	CDS	EGJ24178.1	MOSA_15640
754580	+	CDS	EGJ24178.1	MOSA_15640
754615	+	CDS	EGJ24178.1	MOSA_15640
754627	+	CDS	EGJ24178.1	MOSA_15640
754664	+	CDS	EGJ24178.1	MOSA_15640
754783	+	CDS	EGJ24178.1	MOSA_15640
754886	+	CDS	EGJ24178.1	MOSA_15640
754986	+	CDS	EGJ24178.1	MOSA_15640
755094	+	CDS	EGJ24178.1	MOSA_15640
755161	+	CDS	EGJ24178.1	MOSA_15640
755189	+	intergenic region
755237	+	intergenic region
755336	+	intergenic region
759688	+	CDS	EGJ24183.1	LMOSA_15690	Acetyltransferase
806870	-	intergenic region
806880	-	CDS	EGJ24240.1	LMOSA_16260	Fibronectin-binding protein
806905	-	CDS	EGJ24240.1	LMOSA_16260	Fibronectin-binding protein
806987	-	CDS	EGJ24240.1	LMOSA_16260	Fibronectin-binding protein
807029	-	CDS	EGJ24240.1	LMOSA_16260	Fibronectin-binding protein
807071	-	CDS	EGJ24240.1	LMOSA_16260	Fibronectin-binding protein
807183	-	CDS	EGJ24240.1	LMOSA_16260	Fibronectin-binding protein
807289	-	CDS	EGJ24240.1	LMOSA_16260	Fibronectin-binding protein
807394	-	CDS	EGJ24240.1	LMOSA_16260	Fibronectin-binding protein
807589	-	intergenic region
807791	+	CDS	EGJ24241.1	LMOSA_16270	Pyruvate oxidase
807799	+	CDS	EGJ24241.1	LMOSA_16270	Pyruvate oxidase
807834	+	CDS	EGJ24241.1	LMOSA_16270	Pyruvate oxidase
808015	+	CDS	EGJ24241.1	LMOSA_16270	Pyruvate oxidase
808043	+	CDS	EGJ24241.1	LMOSA_16270	Pyruvate oxidase
808054	+	CDS	EGJ24241.1	LMOSA_16270	Pyruvate oxidase
808095	+	CDS	EGJ24241.1	LMOSA_16270	Pyruvate oxidase
808163	+	CDS	EGJ24241.1	LMOSA_16270	Pyruvate oxidase
812391	-	CDS	EGJ24244.1	MOSA_16300
812699	+	intergenic region
812710	+	intergenic region
812726	+	intergenic region
812746	+	intergenic region
812754	+	intergenic region
812791	+	intergenic region
812809	+	intergenic region
812824	+	intergenic region
812873	+	intergenic region
812890	+	intergenic region
812967	+	CDS	EGJ24245.1	LMOSA_16310	Glucosamine--fructose-6-phosphate aminotransferase
812983	+	CDS	EGJ24245.1	LMOSA_16310	Glucosamine--fructose-6-phosphate aminotransferase
813003	+	CDS	EGJ24245.1	LMOSA_16310	Glucosamine--fructose-6-phosphate aminotransferase
813077	+	CDS	EGJ24245.1	LMOSA_16310	Glucosamine--fructose-6-phosphate aminotransferase
813178	+	CDS	EGJ24245.1	LMOSA_16310	Glucosamine--fructose-6-phosphate aminotransferase
813333	+	CDS	EGJ24245.1	LMOSA_16310	Glucosamine--fructose-6-phosphate aminotransferase
813439	+	CDS	EGJ24245.1	LMOSA_16310	Glucosamine--fructose-6-phosphate aminotransferase
813448	+	CDS	EGJ24245.1	LMOSA_16310	Glucosamine--fructose-6-phosphate aminotransferase
813528	+	CDS	EGJ24245.1	LMOSA_16310	Glucosamine--fructose-6-phosphate aminotransferase
813549	+	CDS	EGJ24245.1	LMOSA_16310	Glucosamine--fructose-6-phosphate aminotransferase
813642	+	CDS	EGJ24245.1	LMOSA_16310	Glucosamine--fructose-6-phosphate aminotransferase
813657	+	CDS	EGJ24245.1	LMOSA_16310	Glucosamine--fructose-6-phosphate aminotransferase
813696	+	CDS	EGJ24245.1	LMOSA_16310	Glucosamine--fructose-6-phosphate aminotransferase
813730	+	CDS	EGJ24245.1	LMOSA_16310	Glucosamine--fructose-6-phosphate aminotransferase
813780	+	CDS	EGJ24245.1	LMOSA_16310	Glucosamine--fructose-6-phosphate aminotransferase
813886	+	CDS	EGJ24245.1	LMOSA_16310	Glucosamine--fructose-6-phosphate aminotransferase
814017	+	CDS	EGJ24245.1	LMOSA_16310	Glucosamine--fructose-6-phosphate aminotransferase
814048	+	CDS	EGJ24245.1	LMOSA_16310	Glucosamine--fructose-6-phosphate aminotransferase
814082	+	CDS	EGJ24245.1	LMOSA_16310	Glucosamine--fructose-6-phosphate aminotransferase
814139	+	CDS	EGJ24245.1	LMOSA_16310	Glucosamine--fructose-6-phosphate aminotransferase
814193	+	CDS	EGJ24245.1	LMOSA_16310	Glucosamine--fructose-6-phosphate aminotransferase
814266	+	CDS	EGJ24245.1	LMOSA_16310	Glucosamine--fructose-6-phosphate aminotransferase
814317	+	CDS	EGJ24245.1	LMOSA_16310	Glucosamine--fructose-6-phosphate aminotransferase
814361	+	CDS	EGJ24245.1	LMOSA_16310	Glucosamine--fructose-6-phosphate aminotransferase
814457	+	CDS	EGJ24245.1	LMOSA_16310	Glucosamine--fructose-6-phosphate aminotransferase
814483	+	CDS	EGJ24245.1	LMOSA_16310	Glucosamine--fructose-6-phosphate aminotransferase
814539	+	CDS	EGJ24245.1	LMOSA_16310	Glucosamine--fructose-6-phosphate aminotransferase
814569	+	CDS	EGJ24245.1	LMOSA_16310	Glucosamine--fructose-6-phosphate aminotransferase
814604	+	CDS	EGJ24245.1	LMOSA_16310	Glucosamine--fructose-6-phosphate aminotransferase
814690	+	CDS	EGJ24245.1	LMOSA_16310	Glucosamine--fructose-6-phosphate aminotransferase
814714	+	CDS	EGJ24245.1	LMOSA_16310	Glucosamine--fructose-6-phosphate aminotransferase
814726	+	CDS	EGJ24245.1	LMOSA_16310	Glucosamine--fructose-6-phosphate aminotransferase
814736	+	intergenic region
814762	+	intergenic region
815672	+	CDS	EGJ24247.1	LMOSA_16330	hypothetical protein
815703	+	CDS	EGJ24247.1	LMOSA_16330	hypothetical protein
815735	+	CDS	EGJ24247.1	LMOSA_16330	hypothetical protein
815745	+	CDS	EGJ24247.1	LMOSA_16330	hypothetical protein
815920	+	CDS	EGJ24247.1	LMOSA_16330	hypothetical protein
815938	+	CDS	EGJ24247.1	LMOSA_16330	hypothetical protein
816047	+	CDS	EGJ24247.1	LMOSA_16330	hypothetical protein
816101	+	CDS	EGJ24247.1	LMOSA_16330	hypothetical protein
816140	+	CDS	EGJ24247.1	LMOSA_16330	hypothetical protein
816148	+	CDS	EGJ24247.1	LMOSA_16330	hypothetical protein
816254	+	CDS	EGJ24248.1	LMOSA_16340	hypothetical protein
816270	+	CDS	EGJ24248.1	LMOSA_16340	hypothetical protein
816430	+	CDS	EGJ24248.1	LMOSA_16340	hypothetical protein
816441	+	CDS	EGJ24248.1	LMOSA_16340	hypothetical protein
816463	+	CDS	EGJ24248.1	LMOSA_16340	hypothetical protein
816473	+	CDS	EGJ24248.1	LMOSA_16340	hypothetical protein
816492	+	CDS	EGJ24248.1	LMOSA_16340	hypothetical protein
816516	+	intergenic region
841474	+	CDS	EGJ24274.1	LMOSA_16610	Diacylglycerol kinase domain protein
841599	+	CDS	EGJ24274.1	LMOSA_16610	Diacylglycerol kinase domain protein
844988	-	CDS	EGJ24279.1	LMOSA_16660	hypothetical protein
845499	-	intergenic region
845507	-	intergenic region
845518	-	CDS	EGJ24280.1	LMOSA_16670	Mannose permease IID component
845624	-	CDS	EGJ24280.1	LMOSA_16670	Mannose permease IID component
845699	-	CDS	EGJ24280.1	LMOSA_16670	Mannose permease IID component
845796	-	CDS	EGJ24280.1	LMOSA_16670	Mannose permease IID component
845861	-	CDS	EGJ24280.1	LMOSA_16670	Mannose permease IID component
845883	-	CDS	EGJ24280.1	LMOSA_16670	Mannose permease IID component
845891	-	CDS	EGJ24280.1	LMOSA_16670	Mannose permease IID component
846145	-	CDS	EGJ24280.1	LMOSA_16670	Mannose permease IID component
846228	-	CDS	EGJ24280.1	LMOSA_16670	Mannose permease IID component
846261	-	CDS	EGJ24280.1	LMOSA_16670	Mannose permease IID component
846439	-	CDS	EGJ24281.1	LMOSA_16680	Mannose permease IIC component
846487	-	CDS	EGJ24281.1	LMOSA_16680	Mannose permease IIC component
846519	-	CDS	EGJ24281.1	LMOSA_16680	Mannose permease IIC component
846596	-	CDS	EGJ24281.1	LMOSA_16680	Mannose permease IIC component
846632	-	CDS	EGJ24281.1	LMOSA_16680	Mannose permease IIC component
847412	-	CDS	EGJ24282.1	LMOSA_16690	PTS system mannose-specific
847440	-	CDS	EGJ24282.1	LMOSA_16690	PTS system mannose-specific
847488	-	CDS	EGJ24282.1	LMOSA_16690	PTS system mannose-specific
847509	-	CDS	EGJ24282.1	LMOSA_16690	PTS system mannose-specific
847692	-	CDS	EGJ24282.1	LMOSA_16690	PTS system mannose-specific
847703	-	CDS	EGJ24282.1	LMOSA_16690	PTS system mannose-specific
847766	-	CDS	EGJ24282.1	LMOSA_16690	PTS system mannose-specific
847813	-	CDS	EGJ24282.1	LMOSA_16690	PTS system mannose-specific
847821	-	CDS	EGJ24282.1	LMOSA_16690	PTS system mannose-specific
847944	-	CDS	EGJ24283.1	LMOSA_16700	Pts system mannose-specific
847962	-	CDS	EGJ24283.1	LMOSA_16700	Pts system mannose-specific
847999	-	CDS	EGJ24283.1	LMOSA_16700	Pts system mannose-specific
848056	-	CDS	EGJ24283.1	LMOSA_16700	Pts system mannose-specific
848096	-	CDS	EGJ24283.1	LMOSA_16700	Pts system mannose-specific
848112	-	CDS	EGJ24283.1	LMOSA_16700	Pts system mannose-specific
848124	-	CDS	EGJ24283.1	LMOSA_16700	Pts system mannose-specific
848155	-	CDS	EGJ24283.1	LMOSA_16700	Pts system mannose-specific
848328	-	intergenic region
848351	-	intergenic region
864962	-	intergenic region
864993	-	CDS	EGJ24294.1	LMOSA_16820	YwnB
865018	-	CDS	EGJ24294.1	LMOSA_16820	YwnB
865069	-	CDS	EGJ24294.1	LMOSA_16820	YwnB
865098	-	CDS	EGJ24294.1	LMOSA_16820	YwnB
865234	-	CDS	EGJ24294.1	LMOSA_16820	YwnB
865248	-	CDS	EGJ24294.1	LMOSA_16820	YwnB
865275	-	CDS	EGJ24294.1	LMOSA_16820	YwnB
865376	-	CDS	EGJ24294.1	LMOSA_16820	YwnB
865384	-	CDS	EGJ24294.1	LMOSA_16820	YwnB
865406	-	CDS	EGJ24294.1	LMOSA_16820	YwnB
865435	-	CDS	EGJ24294.1	LMOSA_16820	YwnB
865461	-	CDS	EGJ24294.1	LMOSA_16820	YwnB
865506	-	CDS	EGJ24294.1	LMOSA_16820	YwnB
[truncated: 6,560 more rows]
