# Supplementary material for: RNA editing, RNA modifications, and transcriptional units in Listeria monocytogenes
Source: Research Square preprint supplement (doi:10.21203/rs.3.rs-1530110/v1), 2022-04-21
Supplement: Supplementary file 16 [file e63e3af7e2c56c2db9b7378f.xlsx]

## Sheet: sRNA_prediction
Table S2. List of predicted sRNAs using ANNOgesic tool.
Rank	Genome	Name	Start	End	Strand	Start_with_TSS/Cleavage_site	End_with_cleavage	Normalized_secondary_energy_change(by_length)	sRNA_types	sRNA_hit|e-value|score	Overlap_CDS_forward	Overlap_nts_forward	Overlap_CDS_reverse	Overlap_nts_reverse	End_with_terminator	sRNA_length	Avg_coverage:rna_reads_forward/rna_reads_reverse	Avg_coverage:tss_reads_forward/tss_reads_reverse
1	CADEHJ010000001.1	sRNA_00096	2451499	2451559	+	TSS:2451499_+	NA	-0.0787	5'UTR_derived	NA	NA	NA	NA	NA	NA	60	35.5236	6013.66
2	CADEHJ010000001.1	sRNA_00095	2422222	2422307	-	TSS:2422307_-	NA	-0.1302	5'UTR_derived	NA	CAB3280489.1	86(100%)	NA	NA	NA	85	22.0852	5451.47
3	CADEHJ010000001.1	sRNA_00049	1371623	1371692	+	TSS:1371623_+	NA	-0.2071	5'UTR_derived	NA	NA	NA	NA	NA	terminator:1371651-1371665_+	69	12.8646	3620.02
4	CADEHJ010000001.1	sRNA_00057	1588810	1588873	-	TSS:1588873_-	NA	-0.1328	5'UTR_derived	NA	NA	NA	NA	NA	NA	63	29.9105	2553.33
5	CADEHJ010000001.1	sRNA_00122	2764152	2764232	+	TSS:2764152_+	NA	-0.4481	Antisense	NA	NA	NA	CAB3280857.1	26(32%)	NA	80	Not_detect	1919.96
6	CADEHJ010000001.1	sRNA_00048	1333306	1333393	+	TSS:1333306_+	NA	-0.3193	Intergenic	NA	NA	NA	NA	NA	terminator:1333338-1333380_+	87	2.1262	1804.84
7	CADEHJ010000001.1	sRNA_00051	1399778	1399852	+	TSS:1399778_+	NA	-0.192	5'UTR_derived	NA	NA	NA	NA	NA	NA	74	49.8531	1695.63
8	CADEHJ010000001.1	sRNA_00090	2341781	2341866	-	TSS:2341855_-;TSS:2341866_-	NA	-0.0988	5'UTR_derived	NA	NA	NA	NA	NA	NA	85	26.4043	1586.38
9	CADEHJ010000001.1	sRNA_00121	2762809	2762870	+	TSS:2762809_+	NA	-0.1887	Intergenic	NA	NA	NA	CAB3280852.1	14(23%)	NA	61	Not_detect	1449.37
10	CADEHJ010000001.1	sRNA_00029	929501	929586	+	TSS:929501_+	NA	-0.1942	InterCDS	NA	CAB3279011.1;CAB3279012.1	2(2%);18(21%)	NA	NA	NA	85	Not_detect	984.21
11	CADEHJ010000001.1	sRNA_00053	1499314	1499402	-	TSS:1499374_-;TSS:1499402_-	NA	-0.2708	3'UTR_derived	NA	NA	NA	CAB3279596.1	44(49%)	terminator:1499322-1499348_-	88	1.14799	937.477
12	CADEHJ010000001.1	sRNA_00110	2551142	2551351	-	TSS:2551236_-;TSS:2551351_-	NA	-0.1776	5'UTR_derived	NA	NA	NA	NA	NA	NA	209	177.877	924.179
13	CADEHJ010000001.1	sRNA_00079	2053910	2053995	+	TSS:2053910_+	NA	-0.0895	5'UTR_derived	NA	NA	NA	NA	NA	NA	85	10.2966	849.083
14	CADEHJ010000001.1	sRNA_00075	1875084	1875165	-	TSS:1875165_-	NA	-0.2073	5'UTR_derived	NA	NA	NA	NA	NA	NA	81	Not_detect	759.501
15	CADEHJ010000001.1	sRNA_00052	1486498	1486579	-	TSS:1486579_-	NA	-0.1988	5'UTR_derived	NA	NA	NA	NA	NA	NA	81	70.5949	689.742
16	CADEHJ010000001.1	sRNA_00028	872347	872430	+	TSS:872347_+	NA	-0.206	Intergenic	NA	NA	NA	NA	NA	NA	83	0.129004	644.173
17	CADEHJ010000001.1	sRNA_00050	1375511	1375584	-	TSS:1375584_-	NA	-0.0851	5'UTR_derived	NA	NA	NA	NA	NA	NA	73	6.91841	614.443
18	CADEHJ010000001.1	sRNA_00042	1290060	1290121	-	TSS:1290121_-	NA	-0.0968	5'UTR_derived	NA	NA	NA	CAB3279393.1;misc_RNA_53	17(27%);62(100%)	NA	61	Not_detect	576.404
19	CADEHJ010000001.1	sRNA_00044	1303104	1303169	+	TSS:1303104_+	NA	-0.0924	5'UTR_derived	NA	NA	NA	NA	NA	NA	65	Not_detect	571.317
20	CADEHJ010000001.1	sRNA_00056	1588701	1588795	-	TSS:1588795_-	NA	-0.3874	5'UTR_derived	NA	NA	NA	NA	NA	NA	94	61.8557	508.106
21	CADEHJ010000001.1	sRNA_00021	573323	573373	-	TSS:573373_-	NA	-0.0627	5'UTR_derived	NA	NA	NA	NA	NA	NA	50	26.1716	499.507
22	CADEHJ010000001.1	sRNA_00030	1000373	1000430	-	TSS:1000430_-	NA	-0.2034	Intergenic	NA	NA	NA	NA	NA	NA	57	0.458096	480.745
23	CADEHJ010000001.1	sRNA_00113	2613747	2613788	-	TSS:2613788_-	NA	-0.0762	5'UTR_derived	NA	NA	NA	NA	NA	NA	41	Not_detect	463.258
24	CADEHJ010000001.1	sRNA_00034	1021565	1021631	+	TSS:1021565_+	NA	-0.1821	Intergenic	NA	NA	NA	NA	NA	NA	66	1.21467	440.605
25	CADEHJ010000001.1	SsrA	2527370	2527653	+	NA	NA	-0.2479	Antisense	slmo2510.1|Listeria monocytogenes EGD-e|SsrA|6e-148|514	NA	NA	rna-OCPFDLNE_02553	284(100%)	NA	283	741.274	Not_detect
26	CADEHJ010000001.1	sRNA_00007	262352	262435	+	TSS:262352_+	NA	-0.1833	Intergenic	NA	NA	NA	NA	NA	NA	83	Not_detect	243.374
27	CADEHJ010000001.1	sRNA_00078	1978152	1978241	-	TSS:1978241_-	NA	-0.2278	Antisense	NA	CAB3280033.1	90(100%)	NA	NA	NA	89	Not_detect	216.645
28	CADEHJ010000001.1	sRNA_00037	1092765	1092852	-	TSS:1092852_-	NA	-0.0602	Intergenic	NA	NA	NA	NA	NA	NA	87	Not_detect	214.899
29	CADEHJ010000001.1	sRNA_00022	639970	640032	+	TSS:639970_+	NA	-0.1492	Intergenic	NA	NA	NA	NA	NA	NA	62	Not_detect	198.269
30	CADEHJ010000001.1	sRNA_00103	2474399	2474501	+	TSS:2474399_+	NA	-0.166	Intergenic	NA	NA	NA	NA	NA	NA	102	0.851691	194.73
31	CADEHJ010000001.1	sRNA_00041	1248550	1248654	+	TSS:1248550_+	NA	-0.0829	Intergenic	NA	NA	NA	NA	NA	NA	104	3.07109	180.53
32	CADEHJ010000001.1	sRNA_00071	1719355	1719464	-	TSS:1719464_-	NA	-0.2964	Intergenic	NA	NA	NA	NA	NA	NA	109	7.49799	169.444
33	CADEHJ010000001.1	sRNA_00001	15635	15772	+	TSS:15635_+;TSS:15707_+	NA	-0.1428	Intergenic	NA	NA	NA	NA	NA	NA	137	3.00796	157.315
34	CADEHJ010000001.1	sRNA_00111	2594002	2594062	+	TSS:2594002_+	NA	-0.2377	Intergenic	NA	NA	NA	CAB3280670.1	14(23%)	NA	60	Not_detect	155.896
35	CADEHJ010000001.1	sRNA_00054	1507099	1507163	-	TSS:1507163_-	NA	-0.1046	3'UTR_derived	NA	NA	NA	misc_RNA_59	57(88%)	NA	64	3.07739	155.738
36	CADEHJ010000001.1	sRNA_00002	28647	28713	+	TSS:28647_+	NA	-0.1403	Intergenic	NA	NA	NA	NA	NA	terminator:28682-28735_+	66	Not_detect	136.867
37	CADEHJ010000001.1	sRNA_00036	1092651	1092734	-	TSS:1092734_-	NA	-0.1381	Intergenic	NA	NA	NA	NA	NA	NA	83	3.20404	126.964
38	CADEHJ010000001.1	sRNA_00038	1129074	1129169	+	TSS:1129074_+	NA	-0.224	Intergenic	NA	NA	NA	NA	NA	NA	95	6.29683	120.923
39	CADEHJ010000001.1	sRNA_00066	1670695	1670741	-	TSS:1670741_-	NA	-0.1064	Intergenic	NA	NA	NA	NA	NA	NA	46	0.129396	119.211
40	CADEHJ010000001.1	sRNA_00106	2545123	2545221	-	TSS:2545221_-	NA	-0.1859	InterCDS	NA	NA	NA	CAB3280605.1	12(12%)	NA	98	Not_detect	107.956
41	CADEHJ010000001.1	sRNA_00126	2888392	2888436	-	TSS:2888436_-	NA	-0.1444	Intergenic	NA	NA	NA	NA	NA	NA	44	0.415271	99.3561
42	CADEHJ010000001.1	sRNA_00019	522855	522918	-	TSS:522918_-	NA	-0.25	Antisense	NA	CAB3278606.1	64(100%)	NA	NA	NA	63	Not_detect	98.6914
43	CADEHJ010000001.1	sRNA_00065	1661352	1661439	-	TSS:1661439_-	NA	-0.092	Intergenic	NA	NA	NA	NA	NA	NA	87	5.00747	96.7342
44	CADEHJ010000001.1	sRNA_00074	1836183	1836246	-	TSS:1836246_-	NA	-0.1906	Intergenic	NA	NA	NA	NA	NA	NA	63	0.272982	91.3122
45	CADEHJ010000001.1	sRNA_00008	267106	267281	+	TSS:267106_+	NA	-0.2227	Intergenic	NA	NA	NA	NA	NA	NA	175	17.3282	90.1596
46	CADEHJ010000001.1	sRNA_00061	1655303	1655358	-	TSS:1655358_-	NA	-0.1232	Intergenic	NA	NA	NA	NA	NA	NA	55	0.985302	86.0574
47	CADEHJ010000001.1	sRNA_00031	1005663	1005726	-	TSS:1005726_-	NA	-0.1187	Intergenic	NA	NA	NA	NA	NA	NA	63	0.509682	83.7191
48	CADEHJ010000001.1	sRNA_00081	2165349	2165402	-	TSS:2165402_-	NA	-0.1685	Intergenic	NA	NA	NA	NA	NA	NA	53	1.18356	83.3652
49	CADEHJ010000001.1	sRNA_00082	2174247	2174302	-	TSS:2174302_-	NA	-0.3286	Intergenic	NA	NA	NA	NA	NA	terminator:2174256-2174284_-	55	0.0312948	80.6677
50	CADEHJ010000001.1	sRNA_00083	2175973	2176056	+	TSS:2175973_+	NA	-0.3536	Intergenic	NA	NA	NA	NA	NA	NA	83	Not_detect	80.4743
51	CADEHJ010000001.1	sRNA_00112	2595387	2595454	+	TSS:2595387_+	NA	-0.3235	Antisense	NA	NA	NA	CAB3280674.1	13(19%)	NA	67	Not_detect	79.9987
52	CADEHJ010000001.1	sRNA_00012	387652	387707	-	TSS:387707_-	NA	-0.0554	Intergenic	NA	NA	NA	CAB3278471.1	17(30%)	NA	55	0.924809	75.6464
53	CADEHJ010000001.1	sRNA_00133	3041387	3041482	-	TSS:3041482_-	NA	-0.1521	Intergenic	NA	NA	NA	NA	NA	NA	95	4.9586	72.953
54	CADEHJ010000001.1	sRNA_00000	1364	1428	+	TSS:1364_+	NA	-0.1708	3'UTR_derived	NA	NA	NA	NA	NA	NA	64	4.5973	72.3519
55	CADEHJ010000001.1	sRNA_00117	2692073	2692145	-	TSS:2692145_-	NA	-0.1315	Intergenic	NA	NA	NA	NA	NA	NA	72	0.435279	68.1711
56	CADEHJ010000001.1	sRNA_00094	2411147	2411199	-	TSS:2411199_-	NA	-0.0604	Intergenic	NA	NA	NA	NA	NA	NA	52	0.571652	59.4786
57	CADEHJ010000001.1	sRNA_00092	2383571	2383626	+	TSS:2383571_+	NA	-0.1625	Intergenic	NA	NA	NA	NA	NA	NA	55	1.14129	58.326
58	CADEHJ010000001.1	sRNA_00026	841823	841875	+	TSS:841823_+	NA	-0.334	Intergenic	NA	NA	NA	NA	NA	terminator:841836-841863_+	52	0.167091	56.771
59	CADEHJ010000001.1	sRNA_00093	2399413	2399461	+	TSS:2399413_+	NA	-0.0633	Intergenic	NA	NA	NA	NA	NA	NA	48	1.16442	50.9088
60	CADEHJ010000001.1	sRNA_00047	1332364	1332421	-	TSS:1332421_-	NA	-0.0845	Intergenic	NA	NA	NA	NA	NA	NA	57	0.428124	50.7609
61	CADEHJ010000001.1	sRNA_00080	2128929	2128978	-	TSS:2128978_-	NA	-0.238	Intergenic	NA	NA	NA	NA	NA	NA	49	0.572778	50.0906
62	CADEHJ010000001.1	sRNA_00131	2963141	2963244	-	TSS:2963244_-	NA	-0.3029	Intergenic	NA	NA	NA	CAB3281064.1	2(2%)	NA	103	0.683677	49.776
63	CADEHJ010000001.1	sRNA_00119	2700069	2700149	-	TSS:2700149_-	NA	-0.2025	Intergenic	NA	NA	NA	NA	NA	NA	80	Not_detect	49.2988
64	CADEHJ010000001.1	sRNA_00102	2472861	2472902	-	TSS:2472902_-	NA	-0.069	Intergenic	NA	NA	NA	NA	NA	NA	41	5.86574	48.126
65	CADEHJ010000001.1	sRNA_00003	53237	53284	+	TSS:53237_+	NA	-0.1667	Intergenic	NA	NA	NA	NA	NA	NA	47	2.90029	47.7731
66	CADEHJ010000001.1	sRNA_00084	2199950	2200012	+	TSS:2199950_+	NA	-0.1349	Intergenic	NA	NA	NA	NA	NA	NA	62	3.77507	47.69
67	CADEHJ010000001.1	sRNA_00132	2994455	2994491	-	TSS:2994491_-	NA	-0.1	Intergenic	NA	NA	NA	NA	NA	NA	36	Not_detect	46.7828
68	CADEHJ010000001.1	sRNA_00073	1737222	1737280	-	TSS:1737280_-	NA	-0.1508	Antisense	NA	CAB3279811.1	59(100%)	NA	NA	terminator:1737232-1737266_-	58	Not_detect	45.8532
69	CADEHJ010000001.1	sRNA_00085	2245841	2245893	+	TSS:2245841_+	NA	-0.0962	Intergenic	NA	NA	NA	NA	NA	NA	52	0.14187	45.4375
70	CADEHJ010000001.1	sRNA_00058	1622876	1622986	-	TSS:1622986_-	NA	-0.1784	Intergenic	NA	NA	NA	NA	NA	NA	110	8.72845	42.1048
71	CADEHJ010000001.1	sRNA_00086	2260953	2260997	-	TSS:2260997_-	NA	-0.0933	Intergenic	NA	NA	NA	NA	NA	NA	44	0.312067	40.9313
72	CADEHJ010000001.1	sRNA_00013	390848	390896	+	TSS:390848_+	NA	-0.0531	Intergenic	NA	NA	NA	NA	NA	NA	48	1.49389	39.4771
73	CADEHJ010000001.1	Rli50/Rli112	2888885	2889023	+	TSS:2888885_+	NA	-0.277	Intergenic	slmo2083.1|Listeria monocytogenes EGD-e|rli50|5e-71|257;slmo2083.2|Listeria monocytogenes EGD-e|rli112|1e-66|243	NA	NA	misc_RNA_105	2(1%)	terminator:2888970-2889008_+	138	Not_detect	35.6888
74	CADEHJ010000001.1	sRNA_00123	2800405	2800626	-	TSS:2800626_-	NA	-0.2234	Intergenic	NA	NA	NA	NA	NA	NA	221	26.483	35.3993
75	CADEHJ010000001.1	sRNA_00004	113327	113373	-	TSS:113373_-	NA	-0.066	Intergenic	NA	NA	NA	NA	NA	NA	46	Not_detect	33.5284
76	CADEHJ010000001.1	sRNA_00118	2693163	2693237	-	TSS:2693237_-	NA	-0.256	Intergenic	NA	NA	NA	NA	NA	terminator:2693164-2693185_-	74	2.20781	32.8668
77	CADEHJ010000001.1	sRNA_00055	1540818	1540870	-	TSS:1540870_-	NA	-0.2811	Intergenic	NA	NA	NA	NA	NA	terminator:1540826-1540847_-	52	0.689892	31.4265
78	CADEHJ010000001.1	sRNA_00115	2628945	2629001	+	TSS:2628945_+	NA	-0.0544	Intergenic	NA	NA	NA	NA	NA	terminator:2629019-2629064_+	56	Not_detect	31.179
79	CADEHJ010000001.1	sRNA_00104	2522691	2522793	-	TSS:2522793_-	NA	-0.3359	Intergenic	NA	NA	NA	NA	NA	NA	102	1.60134	30.9115
80	CADEHJ010000001.1	sRNA_00130	2925741	2925783	+	TSS:2925741_+	NA	-0.0512	Intergenic	NA	NA	NA	NA	NA	NA	42	0.275152	24.5261
81	CADEHJ010000001.1	sRNA_00060	1654166	1654242	-	TSS:1654242_-	NA	-0.1429	3'UTR_derived	NA	NA	NA	misc_RNA_66	62(81%)	NA	76	12.258	Not_detect
