# Supplementary material for: RNA editing, RNA modifications, and transcriptional units in Listeria monocytogenes
Source: Research Square preprint supplement (doi:10.21203/rs.3.rs-1530110/v1), 2022-04-21
Supplement: Supplementary file 17 [file eb434b682886025d4e4cd474.xlsx]

## Sheet: RO15_terminators
Table S4. List of predicted transcription terminators using ANNOgesic tool.
Genome	Name	Start	End	Strand	Detect	Associated_gene	Coverage_decrease	Avg_coverage:rna_reads_forward/rna_reads_reverse	Avg_coverage:tss_reads_forward/tss_reads_reverse
CADEHJ010000001.1	terminator_00002	28682	28735	+	TransTermHP	OCPFDLNE_00026	True	Not_detect	diff=125.5427299205306;high=155.8170756583875;low=30.274345737856894
CADEHJ010000001.1	terminator_00003	31766	31793	+	gene_converged;TransTermHP	ykfA	True	Not_detect	diff=25.254169419300876;high=47.82580187448785;low=22.571632455186975
CADEHJ010000001.1	terminator_00012	177022	177062	-	TransTermHP	OCPFDLNE_00179	True	Not_detect	diff=9.27391350450806;high=18.01131961619334;low=8.73740611168528
CADEHJ010000001.1	terminator_00021	240822	240858	+	TransTermHP	OCPFDLNE_00232	True	diff=0.22114998878769557;high=0.22114998878769557;low=0.0	diff=6.782986323545152;high=10.730147856455607;low=3.9471615329104557
CADEHJ010000001.1	terminator_00023	246180	246190	+	TransTermHP	OCPFDLNE_00235	True	diff=2.7459456941138893;high=5.016418912334231;low=2.2704732182203418	diff=99.35605955655589;high=100.80207472006872;low=1.4460151635128267
CADEHJ010000001.1	terminator_00024	247247	247268	+	TransTermHP	OCPFDLNE_00244	True	diff=66.68409328578069;high=131.73904832082846;low=65.05495503504777	Not_detect
CADEHJ010000001.1	terminator_00026	252221	252236	+	TransTermHP	OCPFDLNE_00247	True	diff=0.42387081184308345;high=0.8329982911003202;low=0.40912747925723675	diff=62.35621043011157;high=62.48395028554556;low=0.1277398554339953
CADEHJ010000001.1	terminator_00035	354388	354442	-	TransTermHP	OCPFDLNE_00339	True	Not_detect	diff=15.175494825558646;high=25.024237679519686;low=9.84874285396104
CADEHJ010000001.1	terminator_00037	464274	464303	+	TransTermHP	OCPFDLNE_00450	True	diff=18.687174052560277;high=36.710898138757464;low=18.023724086197188	diff=1.3029465254267523;high=1.7244880483589369;low=0.4215415229321846
CADEHJ010000001.1	terminator_00056	724402	724416	+	TransTermHP	OCPFDLNE_00704	True	Not_detect	diff=943.4865722354895;high=1450.6010243229075;low=507.11445208741804
CADEHJ010000001.1	terminator_00060	737359	737369	+	TransTermHP	OCPFDLNE_00724	True	diff=9.50944951787091;high=18.687174052560277;low=9.177724534689366	Not_detect
CADEHJ010000001.1	terminator_00065	836530	836554	-	gene_converged	manX_2	True	diff=13.711299304837127;high=25.211098721797295;low=11.499799416960169	Not_detect
CADEHJ010000001.1	terminator_00066	841836	841863	+	TransTermHP	OCPFDLNE_00839	True	Not_detect	diff=38.973429892911966;high=71.85366868162237;low=32.8802387887104
CADEHJ010000001.1	terminator_00067	852607	852617	-	TransTermHP	OCPFDLNE_00848	True	Not_detect	diff=61.813316044510344;high=101.59150702665649;low=39.77819098214614
CADEHJ010000001.1	terminator_00068	872367	872381	+	TransTermHP	OCPFDLNE_00866	True	Not_detect	diff=689.8718632568352;high=1157.4763780585185;low=467.6045148016833
CADEHJ010000001.1	terminator_00069	875070	875117	+	TransTermHP	OCPFDLNE_00868	True	diff=0.11057499439384778;high=0.11057499439384778;low=0.0	diff=34.37479509728814;high=57.71286668507909;low=23.338071587790946
CADEHJ010000001.1	terminator_00073	929524	929545	+	TransTermHP	OCPFDLNE_00911	True	Not_detect	diff=848.448119792597;high=1578.0598520749481;low=729.6117322823511
CADEHJ010000001.1	terminator_00081	1013614	1013640	+	TransTermHP	OCPFDLNE_01003	True	diff=8.95657454590167;high=12.273824377717103;low=3.3172498318154333	Not_detect
CADEHJ010000001.1	terminator_00082	1015764	1015795	+	TransTermHP	OCPFDLNE_01006	True	diff=0.6634499663630866;high=1.2163249383323256;low=0.552874971969239	diff=324.2803970047405;high=339.034350307367;low=14.75395330262646
CADEHJ010000001.1	terminator_00091	1129101	1129124	+	TransTermHP	OCPFDLNE_01129	True	Not_detect	diff=143.05586410053135;high=285.46025493834935;low=142.404390837818
CADEHJ010000001.1	terminator_00097	1212807	1212847	+	TransTermHP	OCPFDLNE_01215	True	Not_detect	diff=7.856001109190713;high=15.59703634849083;low=7.741035239300117
CADEHJ010000001.1	terminator_00110	1333338	1333380	+	TransTermHP	OCPFDLNE_01339	True	diff=0.22114998878769557;high=0.22114998878769557;low=0.0	diff=1408.7917696393608;high=2714.612441813378;low=1305.8206721740173
CADEHJ010000001.1	terminator_00111	1336261	1336280	+	TransTermHP	OCPFDLNE_01341	True	Not_detect	diff=6.629698497024357;high=13.10610916752792;low=6.476410670503563
CADEHJ010000001.1	terminator_00115	1364236	1364255	+	TransTermHP	OCPFDLNE_01367	True	Not_detect	diff=10.538538073304615;high=21.03875418997903;low=10.500216116674416
CADEHJ010000001.1	terminator_00116	1371651	1371665	+	TransTermHP	OCPFDLNE_01376	True	Not_detect	diff=2694.225160886112;high=5352.81090210614;low=2658.585741220028
CADEHJ010000001.1	terminator_00118	1412277	1412300	+	TransTermHP	OCPFDLNE_01421	True	Not_detect	diff=1807.9915918561396;high=3500.6724162120117;low=1692.6808243558721
CADEHJ010000001.1	terminator_00131	1474025	1474047	-	TransTermHP	OCPFDLNE_01478	True	diff=0.11057499439384778;high=0.11057499439384778;low=0.0	diff=16.93830483054778;high=24.717662026478095;low=7.779357195930316
CADEHJ010000001.1	terminator_00132	1499322	1499348	-	TransTermHP	OCPFDLNE_01502	True	diff=0.9951749495446299;high=1.6586249159077167;low=0.6634499663630867	diff=915.4732219388144;high=1416.6477707485517;low=501.1745488097373
CADEHJ010000001.1	terminator_00135	1540826	1540847	-	TransTermHP	OCPFDLNE_01545	True	Not_detect	diff=20.578890710416648;high=40.23805446170853;low=19.65916375129188
CADEHJ010000001.1	terminator_00136	1559216	1559244	-	TransTermHP	OCPFDLNE_01562	True	diff=10.172899484233996;high=19.792923996498754;low=9.620024512264758	diff=4.177093272691647;high=6.55305458376396;low=2.375961311072313
CADEHJ010000001.1	terminator_00138	1586315	1586350	+	gene_converged	transcript_00838	True	diff=9.620024512264758;high=17.91314909180334;low=8.293124579538583	Not_detect
CADEHJ010000001.1	terminator_00145	1651863	1651882	+	TransTermHP	OCPFDLNE_01643	True	Not_detect	diff=5.671649581269392;high=10.691825899825409;low=5.020176318556016
CADEHJ010000001.1	terminator_00151	1718535	1718560	-	TransTermHP	OCPFDLNE_01704	True	diff=6.081624691661629;high=11.05749943938478;low=4.97587474772315	Not_detect
CADEHJ010000001.1	terminator_00152	1737232	1737266	-	gene_converged	transcript_00940	True	Not_detect	diff=36.02263923238669;high=69.74596106696146;low=33.72332183457477
CADEHJ010000001.1	terminator_00153	1754468	1754479	-	TransTermHP	OCPFDLNE_01738	True	Not_detect	diff=15.137172868928449;high=26.997818445974914;low=11.860645577046466
CADEHJ010000001.1	terminator_00154	1755720	1755730	-	TransTermHP	OCPFDLNE_01751	True	diff=1.7231269959708042;high=3.2711769174846714;low=1.5480499215138672	diff=98.29262526006886;high=99.2404549873891;low=0.9478297273202448
CADEHJ010000001.1	terminator_00158	1794043	1794065	+	gene_converged	transcript_00979	True	diff=7.51909961878165;high=14.374749271200212;low=6.855649652418562	Not_detect
CADEHJ010000001.1	terminator_00160	1794173	1794204	-	gene_converged	dgaR_2	True	diff=68.66707151857948;high=132.91114326140504;low=64.24407174282557	diff=0.191609783150993;high=0.191609783150993;low=0.0
CADEHJ010000001.1	terminator_00167	1861621	1861638	-	TransTermHP	OCPFDLNE_01849	True	diff=0.7224232967064712;high=1.2752982686757102;low=0.552874971969239	diff=62.713882025327045;high=63.01023848993391;low=0.2963564646068694
CADEHJ010000001.1	terminator_00169	1866590	1866611	-	TransTermHP	OCPFDLNE_01852	True	diff=66.54587454278582;high=131.49025458343976;low=64.94438004065394	Not_detect
CADEHJ010000001.1	terminator_00171	1872751	1872767	-	TransTermHP	OCPFDLNE_01861	True	diff=12.384399372110954;high=24.658223749828057;low=12.273824377717103	diff=43.112201208973424;high=46.71446513221209;low=3.6022639232386684
CADEHJ010000001.1	terminator_00177	1975871	1975882	-	TransTermHP	OCPFDLNE_01964	True	diff=7573.0602160458475;high=14545.034762566738;low=6971.974546520891	diff=15.788646131641821;high=22.303378758775583;low=6.514732627133762
CADEHJ010000001.1	terminator_00180	2000143	2000160	+	TransTermHP	OCPFDLNE_01988	True	diff=5.418174725298541;high=10.725774456203235;low=5.307599730904694	Not_detect
CADEHJ010000001.1	terminator_00186	2045075	2045091	-	TransTermHP	OCPFDLNE_02033	True	Not_detect	diff=9.772098940700642;high=18.164607442714136;low=8.392508502013493
CADEHJ010000001.1	terminator_00197	2161154	2161179	-	gene_converged	groL	True	Not_detect	diff=64.64914083514503;high=129.25995971365987;low=64.61081887851483
CADEHJ010000001.1	terminator_00199	2164536	2164583	+	gene_converged;TransTermHP	OCPFDLNE_02148	True	Not_detect	diff=9.120625677987267;high=15.90361200153242;low=6.782986323545152
CADEHJ010000001.1	terminator_00201	2174256	2174284	-	TransTermHP	OCPFDLNE_02160	True	Not_detect	diff=53.15255384608545;high=104.65726355707237;low=51.504709710986916
CADEHJ010000001.1	terminator_00203	2202556	2202574	-	TransTermHP	OCPFDLNE_02214	True	diff=6.966224646812411;high=11.610374411354018;low=4.6441497645416066	diff=34.643048793699535;high=46.101313826128916;low=11.45826503242938
CADEHJ010000001.1	terminator_00208	2287861	2287877	+	TransTermHP	OCPFDLNE_02301	True	Not_detect	diff=66976.89312477657;high=132809.95248805496;low=65833.05936327839
CADEHJ010000001.1	terminator_00209	2288158	2288176	-	gene_converged	OCPFDLNE_02302	True	diff=4999.427221529039;high=5955.679773047035;low=956.2525515179956	Not_detect
CADEHJ010000001.1	terminator_00210	2294879	2294918	+	TransTermHP	OCPFDLNE_02307	True	diff=0.6634499663630868;high=1.105749943938478;low=0.44229997757539113	diff=110.78877661790416;high=154.74406087274195;low=43.95528425483779
CADEHJ010000001.1	terminator_00216	2337015	2337051	-	TransTermHP	OCPFDLNE_02348	True	diff=2.7643748598461944;high=4.865299753329302;low=2.100924893483108	diff=41581.43065138014;high=55067.61698476637;low=13486.186333386231
CADEHJ010000001.1	terminator_00222	2407927	2407954	-	TransTermHP	OCPFDLNE_02417	True	diff=1.6586249159077167;high=2.98552484863389;low=1.3268999327261735	diff=31.07910682709106;high=59.973862126260805;low=28.894755299169745
CADEHJ010000001.1	terminator_00225	2462938	2462959	-	TransTermHP	OCPFDLNE_02480	True	diff=66.54587454278582;high=131.49025458343976;low=64.94438004065394	Not_detect
CADEHJ010000001.1	terminator_00226	2463015	2463033	-	gene_converged	srlR_3	True	diff=135.0470835697742;high=266.4175485759531;low=131.3704650061789	diff=14.120363619672167;high=26.55456114761689;low=12.434197527944724
CADEHJ010000001.1	terminator_00232	2545167	2545193	-	TransTermHP	OCPFDLNE_02566	True	Not_detect	diff=89.13687112184193;high=174.3649026674036;low=85.22803154556168
CADEHJ010000001.1	terminator_00234	2548914	2548943	-	gene_converged	gap	True	diff=5.97104969726778;high=11.389224422566322;low=5.418174725298542	diff=0.0766439132603972;high=0.0766439132603972;low=0.0
CADEHJ010000001.1	terminator_00240	2621656	2621676	+	gene_converged	transcript_01457	True	diff=14.153599282412516;high=22.88902383952649;low=8.735424557113975	Not_detect
CADEHJ010000001.1	terminator_00241	2629019	2629064	+	gene_converged	transcript_01461	True	Not_detect	diff=6.01654719094118;high=10.845113726346204;low=4.828566535405024
CADEHJ010000001.1	terminator_00245	2649886	2649936	-	gene_converged	OCPFDLNE_02686	True	Not_detect	diff=223.9535145468806;high=288.9475529916974;low=64.99403844481682
CADEHJ010000001.1	terminator_00248	2684301	2684312	-	TransTermHP	OCPFDLNE_02724	True	Not_detect	diff=15.86529004490222;high=30.810853130679675;low=14.945563085777454
CADEHJ010000001.1	terminator_00250	2693164	2693185	-	TransTermHP	OCPFDLNE_02732	True	Not_detect	diff=22.76324223833797;high=43.18884512223382;low=20.425602883895852
CADEHJ010000001.1	terminator_00252	2706139	2706167	+	gene_converged	transcript_01511	True	diff=18.244874074984885;high=25.653398699372687;low=7.408524624387802	Not_detect
CADEHJ010000001.1	terminator_00253	2711424	2711453	-	gene_converged	czcD	True	diff=99.2963449656753;high=198.37153994256292;low=99.07519497688762	diff=4307.962754583776;high=6625.099862228733;low=2317.137107644958
CADEHJ010000001.1	terminator_00257	2749466	2749485	-	gene_converged	OCPFDLNE_02789	True	diff=25.10052372740345;high=49.86932247162535;low=24.768798744221904	diff=0.22993173978119158;high=0.22993173978119158;low=0.0
CADEHJ010000001.1	terminator_00258	2750116	2750128	-	TransTermHP	OCPFDLNE_02790	True	diff=8.51427456832628;high=16.254524175895625;low=7.7402496075693445	Not_detect
CADEHJ010000001.1	terminator_00259	2766217	2766241	+	gene_converged	transcript_01551	True	Not_detect	diff=190.88166597501922;high=380.53702933787207;low=189.65536336285285
CADEHJ010000001.1	terminator_00262	2776226	2776247	-	TransTermHP	OCPFDLNE_02838	True	diff=66.54587454278582;high=131.49025458343976;low=64.94438004065394	Not_detect
CADEHJ010000001.1	terminator_00263	2776303	2776321	-	gene_converged	salA	True	diff=135.0470835697742;high=266.4175485759531;low=131.3704650061789	diff=14.120363619672167;high=26.55456114761689;low=12.434197527944724
CADEHJ010000001.1	terminator_00266	2800438	2800453	-	TransTermHP	OCPFDLNE_02866	True	diff=22.22557387316341;high=38.811823032240575;low=16.586249159077166	diff=0.5365073928227804;high=0.5365073928227804;low=0.0
CADEHJ010000001.1	terminator_00267	2802685	2802703	-	TransTermHP	OCPFDLNE_02868	True	diff=24.43707376104036;high=45.44632269587144;low=21.009248934831078	diff=0.1532878265207944;high=0.1532878265207944;low=0.0
CADEHJ010000001.1	terminator_00271	2835775	2835796	-	gene_converged	rpsL	True	diff=11.278649428172473;high=22.336148867557252;low=11.05749943938478	Not_detect
CADEHJ010000001.1	terminator_00277	2875188	2875205	-	TransTermHP	OCPFDLNE_02950	True	Not_detect	diff=145.2402156284527;high=205.40568753786448;low=60.1654719094118
CADEHJ010000001.1	terminator_00280	2888970	2889008	+	TransTermHP	OCPFDLNE_02966	True	diff=3.3172498318154338;high=6.52392466923702;low=3.206674837421586	diff=17.70474396315175;high=35.14123422989211;low=17.436490266740364
CADEHJ010000001.1	terminator_00281	2890137	2890163	-	TransTermHP	OCPFDLNE_02968	True	diff=11.278649428172473;high=19.350624018923362;low=8.071974590750889	diff=0.6131513060831776;high=0.7281171759737733;low=0.11496586989059579
CADEHJ010000001.1	terminator_00282	2894286	2894347	-	gene_converged	OCPFDLNE_02972	True	diff=0.11057499439384778;high=0.11057499439384778;low=0.0	diff=409.77668224671356;high=627.4453959062416;low=217.66871365952804
CADEHJ010000001.1	terminator_00283	2900421	2900437	-	TransTermHP	OCPFDLNE_02976	True	Not_detect	diff=8.2392206754927;high=16.363475481094802;low=8.124254805602103
CADEHJ010000001.1	terminator_00286	2963176	2963223	-	TransTermHP	OCPFDLNE_03033	True	diff=0.11057499439384778;high=0.11057499439384778;low=0.0	diff=41.1194594642031;high=73.50151281672092;low=32.382053352517815
CADEHJ010000001.1	terminator_00289	2982424	2982445	-	gene_converged	OCPFDLNE_03051	True	diff=110.24326941066624;high=205.2271895949815;low=94.98392018431525	diff=56.02670059335035;high=66.25866301361337;low=10.231962420263025
