# Supplementary material for: RNA editing, RNA modifications, and transcriptional units in Listeria monocytogenes
Source: Research Square preprint supplement (doi:10.21203/rs.3.rs-1530110/v1), 2022-04-21
Supplement: Supplementary file 18 [file ee1fe47310ddd1ff645d8c82.xlsx]

## Sheet: R158_modifications
Table S10. Position of RNA modifications predicted using direct RNA-seq data in ScottA 400 MPa treated sample at time point 24 h.
Position	RNA_mod_strand	feature	Protein ID	Locus Tag	Product
4655	+	CDS	EGJ23432.1	LMOSA_8270	S4 domain protein YaaA
4710	+	CDS	EGJ23432.1	LMOSA_8270	S4 domain protein YaaA
4735	+	CDS	EGJ23432.1	LMOSA_8270	S4 domain protein YaaA
4794	+	CDS	EGJ23432.1	LMOSA_8270	S4 domain protein YaaA
4877	+	CDS	EGJ23433.1	LMOSA_8280	DNA replication and repair protein recF
5002	+	CDS	EGJ23433.1	LMOSA_8280	DNA replication and repair protein recF
5014	+	CDS	EGJ23433.1	LMOSA_8280	DNA replication and repair protein recF
5025	+	CDS	EGJ23433.1	LMOSA_8280	DNA replication and repair protein recF
5038	+	CDS	EGJ23433.1	LMOSA_8280	DNA replication and repair protein recF
5059	+	CDS	EGJ23433.1	LMOSA_8280	DNA replication and repair protein recF
57166	+	CDS	EGJ23488.1	LMOSA_8810	Lipoprotein
57962	+	CDS	EGJ23489.1	LMOSA_8820	Putative AgrB-like protein
57975	+	CDS	EGJ23489.1	LMOSA_8820	Putative AgrB-like protein
57992	+	CDS	EGJ23489.1	LMOSA_8820	Putative AgrB-like protein
58006	+	CDS	EGJ23489.1	LMOSA_8820	Putative AgrB-like protein
58036	+	CDS	EGJ23489.1	LMOSA_8820	Putative AgrB-like protein
58057	+	CDS	EGJ23489.1	LMOSA_8820	Putative AgrB-like protein
58116	+	CDS	EGJ23489.1	LMOSA_8820	Putative AgrB-like protein
58126	+	CDS	EGJ23489.1	LMOSA_8820	Putative AgrB-like protein
58241	+	CDS	EGJ23489.1	LMOSA_8820	Putative AgrB-like protein
58291	+	CDS	EGJ23489.1	LMOSA_8820	Putative AgrB-like protein
58302	+	CDS	EGJ23489.1	LMOSA_8820	Putative AgrB-like protein
58350	+	CDS	EGJ23489.1	LMOSA_8820	Putative AgrB-like protein
58361	+	CDS	EGJ23489.1	LMOSA_8820	Putative AgrB-like protein
58377	+	CDS	EGJ23489.1	LMOSA_8820	Putative AgrB-like protein
58414	+	CDS	EGJ23489.1	LMOSA_8820	Putative AgrB-like protein
58467	+	CDS	EGJ23489.1	LMOSA_8820	Putative AgrB-like protein
58505	+	CDS	EGJ23489.1	LMOSA_8820	Putative AgrB-like protein
58603	+	intergenic region
58618	+	intergenic region
58642	+	intergenic region
58673	+	intergenic region
58760	+	intergenic region
58785	+	intergenic region
58798	+	intergenic region
58829	+	CDS	EGJ23490.1	LMOSA_8830	Accessory gene regulator protein C
58870	+	CDS	EGJ23490.1	LMOSA_8830	Accessory gene regulator protein C
58887	+	CDS	EGJ23490.1	LMOSA_8830	Accessory gene regulator protein C
58895	+	CDS	EGJ23490.1	LMOSA_8830	Accessory gene regulator protein C
58970	+	CDS	EGJ23490.1	LMOSA_8830	Accessory gene regulator protein C
59053	+	CDS	EGJ23490.1	LMOSA_8830	Accessory gene regulator protein C
59108	+	CDS	EGJ23490.1	LMOSA_8830	Accessory gene regulator protein C
59127	+	CDS	EGJ23490.1	LMOSA_8830	Accessory gene regulator protein C
236158	+	CDS	EGJ23693.1	LMOSA_10820	Protein veg
236166	+	CDS	EGJ23693.1	LMOSA_10820	Protein veg
236289	+	CDS	EGJ23693.1	LMOSA_10820	Protein veg
236328	+	CDS	EGJ23693.1	LMOSA_10820	Protein veg
236343	+	CDS	EGJ23693.1	LMOSA_10820	Protein veg
236365	+	CDS	EGJ23693.1	LMOSA_10820	Protein veg
236394	+	intergenic region
244510	+	CDS	EGJ23702.1	LMOSA_10910	Bifunctional protein glmU
244549	+	CDS	EGJ23702.1	LMOSA_10910	Bifunctional protein glmU
244575	+	CDS	EGJ23702.1	LMOSA_10910	Bifunctional protein glmU
244620	+	CDS	EGJ23702.1	LMOSA_10910	Bifunctional protein glmU
244706	+	CDS	EGJ23702.1	LMOSA_10910	Bifunctional protein glmU
244743	+	CDS	EGJ23702.1	LMOSA_10910	Bifunctional protein glmU
244806	+	CDS	EGJ23702.1	LMOSA_10910	Bifunctional protein glmU
244860	+	CDS	EGJ23702.1	LMOSA_10910	Bifunctional protein glmU
244894	+	CDS	EGJ23702.1	LMOSA_10910	Bifunctional protein glmU
244950	+	CDS	EGJ23702.1	LMOSA_10910	Bifunctional protein glmU
248363	+	CDS	EGJ23706.1	LMOSA_10950	Listeriolysin O
248403	+	CDS	EGJ23706.1	LMOSA_10950	Listeriolysin O
248538	+	CDS	EGJ23706.1	LMOSA_10950	Listeriolysin O
248602	+	CDS	EGJ23706.1	LMOSA_10950	Listeriolysin O
248617	+	CDS	EGJ23706.1	LMOSA_10950	Listeriolysin O
248667	+	CDS	EGJ23706.1	LMOSA_10950	Listeriolysin O
248788	+	CDS	EGJ23706.1	LMOSA_10950	Listeriolysin O
248903	+	CDS	EGJ23706.1	LMOSA_10950	Listeriolysin O
248961	+	CDS	EGJ23706.1	LMOSA_10950	Listeriolysin O
248980	+	CDS	EGJ23706.1	LMOSA_10950	Listeriolysin O
249020	+	CDS	EGJ23706.1	LMOSA_10950	Listeriolysin O
249028	+	CDS	EGJ23706.1	LMOSA_10950	Listeriolysin O
249087	+	CDS	EGJ23706.1	LMOSA_10950	Listeriolysin O
249097	+	CDS	EGJ23706.1	LMOSA_10950	Listeriolysin O
249202	+	CDS	EGJ23706.1	LMOSA_10950	Listeriolysin O
249220	+	CDS	EGJ23706.1	LMOSA_10950	Listeriolysin O
249253	+	CDS	EGJ23706.1	LMOSA_10950	Listeriolysin O
249302	+	CDS	EGJ23706.1	LMOSA_10950	Listeriolysin O
249353	+	CDS	EGJ23706.1	LMOSA_10950	Listeriolysin O
249422	+	CDS	EGJ23706.1	LMOSA_10950	Listeriolysin O
249471	+	CDS	EGJ23706.1	LMOSA_10950	Listeriolysin O
249503	+	CDS	EGJ23706.1	LMOSA_10950	Listeriolysin O
249669	+	CDS	EGJ23706.1	LMOSA_10950	Listeriolysin O
249686	+	CDS	EGJ23706.1	LMOSA_10950	Listeriolysin O
249722	+	CDS	EGJ23706.1	LMOSA_10950	Listeriolysin O
249737	+	CDS	EGJ23706.1	LMOSA_10950	Listeriolysin O
249773	+	CDS	EGJ23706.1	LMOSA_10950	Listeriolysin O
249850	+	CDS	EGJ23706.1	LMOSA_10950	Listeriolysin O
249932	+	CDS	EGJ23706.1	LMOSA_10950	Listeriolysin O
250000	+	intergenic region
257225	-	CDS	EGJ23714.1	LMOSA_11030	L-lactate dehydrogenase 1
257310	-	CDS	EGJ23714.1	LMOSA_11030	L-lactate dehydrogenase 1
257371	-	CDS	EGJ23714.1	LMOSA_11030	L-lactate dehydrogenase 1
257383	-	CDS	EGJ23714.1	LMOSA_11030	L-lactate dehydrogenase 1
257505	-	CDS	EGJ23714.1	LMOSA_11030	L-lactate dehydrogenase 1
257570	-	CDS	EGJ23714.1	LMOSA_11030	L-lactate dehydrogenase 1
257649	-	CDS	EGJ23714.1	LMOSA_11030	L-lactate dehydrogenase 1
257730	-	CDS	EGJ23714.1	LMOSA_11030	L-lactate dehydrogenase 1
280008	+	rRNA		LMOSA_r140	16S ribosomal RNA
280022	+	rRNA		LMOSA_r140	16S ribosomal RNA
280030	+	rRNA		LMOSA_r140	16S ribosomal RNA
280055	+	rRNA		LMOSA_r140	16S ribosomal RNA
280063	+	rRNA		LMOSA_r140	16S ribosomal RNA
280087	+	rRNA		LMOSA_r140	16S ribosomal RNA
280095	+	rRNA		LMOSA_r140	16S ribosomal RNA
280128	+	rRNA		LMOSA_r140	16S ribosomal RNA
280151	+	rRNA		LMOSA_r140	16S ribosomal RNA
280184	+	rRNA		LMOSA_r140	16S ribosomal RNA
280227	+	rRNA		LMOSA_r140	16S ribosomal RNA
280259	+	rRNA		LMOSA_r140	16S ribosomal RNA
280270	+	rRNA		LMOSA_r140	16S ribosomal RNA
280303	+	rRNA		LMOSA_r140	16S ribosomal RNA
280335	+	rRNA		LMOSA_r140	16S ribosomal RNA
280353	+	rRNA		LMOSA_r140	16S ribosomal RNA
280369	+	rRNA		LMOSA_r140	16S ribosomal RNA
280386	+	rRNA		LMOSA_r140	16S ribosomal RNA
280440	+	rRNA		LMOSA_r140	16S ribosomal RNA
280448	+	rRNA		LMOSA_r140	16S ribosomal RNA
280520	+	rRNA		LMOSA_r140	16S ribosomal RNA
280529	+	rRNA		LMOSA_r140	16S ribosomal RNA
280539	+	rRNA		LMOSA_r140	16S ribosomal RNA
280550	+	rRNA		LMOSA_r140	16S ribosomal RNA
280585	+	rRNA		LMOSA_r140	16S ribosomal RNA
280617	+	rRNA		LMOSA_r140	16S ribosomal RNA
280626	+	rRNA		LMOSA_r140	16S ribosomal RNA
280634	+	rRNA		LMOSA_r140	16S ribosomal RNA
280700	+	rRNA		LMOSA_r140	16S ribosomal RNA
280714	+	rRNA		LMOSA_r140	16S ribosomal RNA
280724	+	rRNA		LMOSA_r140	16S ribosomal RNA
280755	+	rRNA		LMOSA_r140	16S ribosomal RNA
280783	+	rRNA		LMOSA_r140	16S ribosomal RNA
280791	+	rRNA		LMOSA_r140	16S ribosomal RNA
280807	+	rRNA		LMOSA_r140	16S ribosomal RNA
280870	+	rRNA		LMOSA_r140	16S ribosomal RNA
280888	+	rRNA		LMOSA_r140	16S ribosomal RNA
280942	+	rRNA		LMOSA_r140	16S ribosomal RNA
280963	+	rRNA		LMOSA_r140	16S ribosomal RNA
280972	+	rRNA		LMOSA_r140	16S ribosomal RNA
280985	+	rRNA		LMOSA_r140	16S ribosomal RNA
281008	+	rRNA		LMOSA_r140	16S ribosomal RNA
281038	+	rRNA		LMOSA_r140	16S ribosomal RNA
281049	+	rRNA		LMOSA_r140	16S ribosomal RNA
281111	+	rRNA		LMOSA_r140	16S ribosomal RNA
281162	+	rRNA		LMOSA_r140	16S ribosomal RNA
281198	+	rRNA		LMOSA_r140	16S ribosomal RNA
281217	+	rRNA		LMOSA_r140	16S ribosomal RNA
281253	+	rRNA		LMOSA_r140	16S ribosomal RNA
281332	+	rRNA		LMOSA_r140	16S ribosomal RNA
281356	+	rRNA		LMOSA_r140	16S ribosomal RNA
281420	+	rRNA		LMOSA_r140	16S ribosomal RNA
281440	+	rRNA		LMOSA_r140	16S ribosomal RNA
281454	+	rRNA		LMOSA_r140	16S ribosomal RNA
281473	+	intergenic region
281738	+	rRNA		LMOSA_r80	23S ribosomal RNA
281782	+	rRNA		LMOSA_r80	23S ribosomal RNA
281795	+	rRNA		LMOSA_r80	23S ribosomal RNA
281854	+	rRNA		LMOSA_r80	23S ribosomal RNA
281886	+	rRNA		LMOSA_r80	23S ribosomal RNA
281900	+	rRNA		LMOSA_r80	23S ribosomal RNA
281918	+	rRNA		LMOSA_r80	23S ribosomal RNA
281972	+	rRNA		LMOSA_r80	23S ribosomal RNA
281993	+	rRNA		LMOSA_r80	23S ribosomal RNA
282009	+	rRNA		LMOSA_r80	23S ribosomal RNA
282044	+	rRNA		LMOSA_r80	23S ribosomal RNA
282064	+	rRNA		LMOSA_r80	23S ribosomal RNA
282083	+	rRNA		LMOSA_r80	23S ribosomal RNA
282099	+	rRNA		LMOSA_r80	23S ribosomal RNA
282150	+	rRNA		LMOSA_r80	23S ribosomal RNA
282164	+	rRNA		LMOSA_r80	23S ribosomal RNA
282239	+	rRNA		LMOSA_r80	23S ribosomal RNA
282291	+	rRNA		LMOSA_r80	23S ribosomal RNA
282329	+	rRNA		LMOSA_r80	23S ribosomal RNA
282355	+	rRNA		LMOSA_r80	23S ribosomal RNA
282365	+	rRNA		LMOSA_r80	23S ribosomal RNA
282413	+	rRNA		LMOSA_r80	23S ribosomal RNA
282444	+	rRNA		LMOSA_r80	23S ribosomal RNA
282461	+	rRNA		LMOSA_r80	23S ribosomal RNA
282504	+	rRNA		LMOSA_r80	23S ribosomal RNA
282519	+	rRNA		LMOSA_r80	23S ribosomal RNA
282596	+	rRNA		LMOSA_r80	23S ribosomal RNA
282625	+	rRNA		LMOSA_r80	23S ribosomal RNA
282664	+	rRNA		LMOSA_r80	23S ribosomal RNA
282699	+	rRNA		LMOSA_r80	23S ribosomal RNA
282720	+	rRNA		LMOSA_r80	23S ribosomal RNA
282746	+	rRNA		LMOSA_r80	23S ribosomal RNA
282756	+	rRNA		LMOSA_r80	23S ribosomal RNA
282817	+	rRNA		LMOSA_r80	23S ribosomal RNA
282826	+	rRNA		LMOSA_r80	23S ribosomal RNA
282848	+	rRNA		LMOSA_r80	23S ribosomal RNA
282886	+	rRNA		LMOSA_r80	23S ribosomal RNA
282922	+	rRNA		LMOSA_r80	23S ribosomal RNA
282934	+	rRNA		LMOSA_r80	23S ribosomal RNA
282981	+	rRNA		LMOSA_r80	23S ribosomal RNA
282994	+	rRNA		LMOSA_r80	23S ribosomal RNA
283002	+	rRNA		LMOSA_r80	23S ribosomal RNA
283027	+	rRNA		LMOSA_r80	23S ribosomal RNA
283038	+	rRNA		LMOSA_r80	23S ribosomal RNA
283122	+	rRNA		LMOSA_r80	23S ribosomal RNA
283134	+	rRNA		LMOSA_r80	23S ribosomal RNA
283144	+	rRNA		LMOSA_r80	23S ribosomal RNA
283162	+	rRNA		LMOSA_r80	23S ribosomal RNA
283181	+	rRNA		LMOSA_r80	23S ribosomal RNA
283199	+	rRNA		LMOSA_r80	23S ribosomal RNA
283226	+	rRNA		LMOSA_r80	23S ribosomal RNA
283248	+	rRNA		LMOSA_r80	23S ribosomal RNA
283276	+	rRNA		LMOSA_r80	23S ribosomal RNA
283285	+	rRNA		LMOSA_r80	23S ribosomal RNA
283306	+	rRNA		LMOSA_r80	23S ribosomal RNA
283333	+	rRNA		LMOSA_r80	23S ribosomal RNA
283348	+	rRNA		LMOSA_r80	23S ribosomal RNA
283385	+	rRNA		LMOSA_r80	23S ribosomal RNA
283397	+	rRNA		LMOSA_r80	23S ribosomal RNA
283407	+	rRNA		LMOSA_r80	23S ribosomal RNA
283480	+	rRNA		LMOSA_r80	23S ribosomal RNA
283512	+	rRNA		LMOSA_r80	23S ribosomal RNA
283576	+	rRNA		LMOSA_r80	23S ribosomal RNA
283604	+	rRNA		LMOSA_r80	23S ribosomal RNA
283641	+	rRNA		LMOSA_r80	23S ribosomal RNA
283654	+	rRNA		LMOSA_r80	23S ribosomal RNA
283664	+	rRNA		LMOSA_r80	23S ribosomal RNA
283714	+	rRNA		LMOSA_r80	23S ribosomal RNA
283725	+	rRNA		LMOSA_r80	23S ribosomal RNA
283780	+	rRNA		LMOSA_r80	23S ribosomal RNA
283801	+	rRNA		LMOSA_r80	23S ribosomal RNA
283830	+	rRNA		LMOSA_r80	23S ribosomal RNA
283858	+	rRNA		LMOSA_r80	23S ribosomal RNA
283902	+	rRNA		LMOSA_r80	23S ribosomal RNA
283915	+	rRNA		LMOSA_r80	23S ribosomal RNA
283953	+	rRNA		LMOSA_r80	23S ribosomal RNA
283968	+	rRNA		LMOSA_r80	23S ribosomal RNA
283986	+	rRNA		LMOSA_r80	23S ribosomal RNA
284017	+	rRNA		LMOSA_r80	23S ribosomal RNA
284119	+	rRNA		LMOSA_r80	23S ribosomal RNA
284155	+	rRNA		LMOSA_r80	23S ribosomal RNA
284173	+	rRNA		LMOSA_r80	23S ribosomal RNA
284182	+	rRNA		LMOSA_r80	23S ribosomal RNA
284193	+	rRNA		LMOSA_r80	23S ribosomal RNA
284227	+	rRNA		LMOSA_r80	23S ribosomal RNA
284235	+	rRNA		LMOSA_r80	23S ribosomal RNA
284249	+	rRNA		LMOSA_r80	23S ribosomal RNA
284281	+	rRNA		LMOSA_r80	23S ribosomal RNA
284315	+	rRNA		LMOSA_r80	23S ribosomal RNA
284336	+	rRNA		LMOSA_r80	23S ribosomal RNA
284344	+	rRNA		LMOSA_r80	23S ribosomal RNA
284380	+	rRNA		LMOSA_r80	23S ribosomal RNA
284417	+	rRNA		LMOSA_r80	23S ribosomal RNA
284451	+	rRNA		LMOSA_r80	23S ribosomal RNA
284492	+	rRNA		LMOSA_r80	23S ribosomal RNA
284509	+	rRNA		LMOSA_r80	23S ribosomal RNA
284520	+	rRNA		LMOSA_r80	23S ribosomal RNA
284528	+	rRNA		LMOSA_r80	23S ribosomal RNA
284544	+	rRNA		LMOSA_r80	23S ribosomal RNA
284553	+	rRNA		LMOSA_r80	23S ribosomal RNA
284566	+	rRNA		LMOSA_r80	23S ribosomal RNA
284577	+	rRNA		LMOSA_r80	23S ribosomal RNA
284588	+	rRNA		LMOSA_r80	23S ribosomal RNA
284599	+	rRNA		LMOSA_r80	23S ribosomal RNA
284611	+	rRNA		LMOSA_r80	23S ribosomal RNA
284629	+	rRNA		LMOSA_r80	23S ribosomal RNA
284645	+	intergenic region
284797	+	rRNA		LMOSA_r20	5S ribosomal RNA
284805	+	rRNA		LMOSA_r20	5S ribosomal RNA
286028	+	rRNA		LMOSA_r170	16S ribosomal RNA
286042	+	rRNA		LMOSA_r170	16S ribosomal RNA
286050	+	rRNA		LMOSA_r170	16S ribosomal RNA
286075	+	rRNA		LMOSA_r170	16S ribosomal RNA
286083	+	rRNA		LMOSA_r170	16S ribosomal RNA
286107	+	rRNA		LMOSA_r170	16S ribosomal RNA
286115	+	rRNA		LMOSA_r170	16S ribosomal RNA
286148	+	rRNA		LMOSA_r170	16S ribosomal RNA
286171	+	rRNA		LMOSA_r170	16S ribosomal RNA
286204	+	rRNA		LMOSA_r170	16S ribosomal RNA
286248	+	rRNA		LMOSA_r170	16S ribosomal RNA
286279	+	rRNA		LMOSA_r170	16S ribosomal RNA
286290	+	rRNA		LMOSA_r170	16S ribosomal RNA
286323	+	rRNA		LMOSA_r170	16S ribosomal RNA
286355	+	rRNA		LMOSA_r170	16S ribosomal RNA
286373	+	rRNA		LMOSA_r170	16S ribosomal RNA
286388	+	rRNA		LMOSA_r170	16S ribosomal RNA
286406	+	rRNA		LMOSA_r170	16S ribosomal RNA
286460	+	rRNA		LMOSA_r170	16S ribosomal RNA
286468	+	rRNA		LMOSA_r170	16S ribosomal RNA
286540	+	rRNA		LMOSA_r170	16S ribosomal RNA
286550	+	rRNA		LMOSA_r170	16S ribosomal RNA
286559	+	rRNA		LMOSA_r170	16S ribosomal RNA
286570	+	rRNA		LMOSA_r170	16S ribosomal RNA
286605	+	rRNA		LMOSA_r170	16S ribosomal RNA
286646	+	rRNA		LMOSA_r170	16S ribosomal RNA
286654	+	rRNA		LMOSA_r170	16S ribosomal RNA
286720	+	rRNA		LMOSA_r170	16S ribosomal RNA
286734	+	rRNA		LMOSA_r170	16S ribosomal RNA
286744	+	rRNA		LMOSA_r170	16S ribosomal RNA
286775	+	rRNA		LMOSA_r170	16S ribosomal RNA
286803	+	rRNA		LMOSA_r170	16S ribosomal RNA
286811	+	rRNA		LMOSA_r170	16S ribosomal RNA
286827	+	rRNA		LMOSA_r170	16S ribosomal RNA
286889	+	rRNA		LMOSA_r170	16S ribosomal RNA
286908	+	rRNA		LMOSA_r170	16S ribosomal RNA
286962	+	rRNA		LMOSA_r170	16S ribosomal RNA
286983	+	rRNA		LMOSA_r170	16S ribosomal RNA
286992	+	rRNA		LMOSA_r170	16S ribosomal RNA
287005	+	rRNA		LMOSA_r170	16S ribosomal RNA
287028	+	rRNA		LMOSA_r170	16S ribosomal RNA
287058	+	rRNA		LMOSA_r170	16S ribosomal RNA
287069	+	rRNA		LMOSA_r170	16S ribosomal RNA
287131	+	rRNA		LMOSA_r170	16S ribosomal RNA
287182	+	rRNA		LMOSA_r170	16S ribosomal RNA
287218	+	rRNA		LMOSA_r170	16S ribosomal RNA
287237	+	rRNA		LMOSA_r170	16S ribosomal RNA
287273	+	rRNA		LMOSA_r170	16S ribosomal RNA
287352	+	rRNA		LMOSA_r170	16S ribosomal RNA
287376	+	rRNA		LMOSA_r170	16S ribosomal RNA
287440	+	rRNA		LMOSA_r170	16S ribosomal RNA
287460	+	rRNA		LMOSA_r170	16S ribosomal RNA
287474	+	rRNA		LMOSA_r170	16S ribosomal RNA
287493	+	intergenic region
287759	+	rRNA		LMOSA_r110	23S ribosomal RNA
287802	+	rRNA		LMOSA_r110	23S ribosomal RNA
287815	+	rRNA		LMOSA_r110	23S ribosomal RNA
287874	+	rRNA		LMOSA_r110	23S ribosomal RNA
287907	+	rRNA		LMOSA_r110	23S ribosomal RNA
287920	+	rRNA		LMOSA_r110	23S ribosomal RNA
287938	+	rRNA		LMOSA_r110	23S ribosomal RNA
287992	+	rRNA		LMOSA_r110	23S ribosomal RNA
288013	+	rRNA		LMOSA_r110	23S ribosomal RNA
288029	+	rRNA		LMOSA_r110	23S ribosomal RNA
288064	+	rRNA		LMOSA_r110	23S ribosomal RNA
288084	+	rRNA		LMOSA_r110	23S ribosomal RNA
288103	+	rRNA		LMOSA_r110	23S ribosomal RNA
288119	+	rRNA		LMOSA_r110	23S ribosomal RNA
288170	+	rRNA		LMOSA_r110	23S ribosomal RNA
288184	+	rRNA		LMOSA_r110	23S ribosomal RNA
288235	+	rRNA		LMOSA_r110	23S ribosomal RNA
288260	+	rRNA		LMOSA_r110	23S ribosomal RNA
288311	+	rRNA		LMOSA_r110	23S ribosomal RNA
288349	+	rRNA		LMOSA_r110	23S ribosomal RNA
288375	+	rRNA		LMOSA_r110	23S ribosomal RNA
288433	+	rRNA		LMOSA_r110	23S ribosomal RNA
288464	+	rRNA		LMOSA_r110	23S ribosomal RNA
288481	+	rRNA		LMOSA_r110	23S ribosomal RNA
288524	+	rRNA		LMOSA_r110	23S ribosomal RNA
288539	+	rRNA		LMOSA_r110	23S ribosomal RNA
288616	+	rRNA		LMOSA_r110	23S ribosomal RNA
288645	+	rRNA		LMOSA_r110	23S ribosomal RNA
288686	+	rRNA		LMOSA_r110	23S ribosomal RNA
288719	+	rRNA		LMOSA_r110	23S ribosomal RNA
288739	+	rRNA		LMOSA_r110	23S ribosomal RNA
288776	+	rRNA		LMOSA_r110	23S ribosomal RNA
288837	+	rRNA		LMOSA_r110	23S ribosomal RNA
288846	+	rRNA		LMOSA_r110	23S ribosomal RNA
288906	+	rRNA		LMOSA_r110	23S ribosomal RNA
288942	+	rRNA		LMOSA_r110	23S ribosomal RNA
288954	+	rRNA		LMOSA_r110	23S ribosomal RNA
289000	+	rRNA		LMOSA_r110	23S ribosomal RNA
289014	+	rRNA		LMOSA_r110	23S ribosomal RNA
289022	+	rRNA		LMOSA_r110	23S ribosomal RNA
289047	+	rRNA		LMOSA_r110	23S ribosomal RNA
289058	+	rRNA		LMOSA_r110	23S ribosomal RNA
289142	+	rRNA		LMOSA_r110	23S ribosomal RNA
289156	+	rRNA		LMOSA_r110	23S ribosomal RNA
289164	+	rRNA		LMOSA_r110	23S ribosomal RNA
289182	+	rRNA		LMOSA_r110	23S ribosomal RNA
289201	+	rRNA		LMOSA_r110	23S ribosomal RNA
289219	+	rRNA		LMOSA_r110	23S ribosomal RNA
289246	+	rRNA		LMOSA_r110	23S ribosomal RNA
289268	+	rRNA		LMOSA_r110	23S ribosomal RNA
289296	+	rRNA		LMOSA_r110	23S ribosomal RNA
289305	+	rRNA		LMOSA_r110	23S ribosomal RNA
289325	+	rRNA		LMOSA_r110	23S ribosomal RNA
289353	+	rRNA		LMOSA_r110	23S ribosomal RNA
289368	+	rRNA		LMOSA_r110	23S ribosomal RNA
289405	+	rRNA		LMOSA_r110	23S ribosomal RNA
289417	+	rRNA		LMOSA_r110	23S ribosomal RNA
289427	+	rRNA		LMOSA_r110	23S ribosomal RNA
289500	+	rRNA		LMOSA_r110	23S ribosomal RNA
289532	+	rRNA		LMOSA_r110	23S ribosomal RNA
289596	+	rRNA		LMOSA_r110	23S ribosomal RNA
289624	+	rRNA		LMOSA_r110	23S ribosomal RNA
289661	+	rRNA		LMOSA_r110	23S ribosomal RNA
289674	+	rRNA		LMOSA_r110	23S ribosomal RNA
289684	+	rRNA		LMOSA_r110	23S ribosomal RNA
289734	+	rRNA		LMOSA_r110	23S ribosomal RNA
289745	+	rRNA		LMOSA_r110	23S ribosomal RNA
289800	+	rRNA		LMOSA_r110	23S ribosomal RNA
289821	+	rRNA		LMOSA_r110	23S ribosomal RNA
289850	+	rRNA		LMOSA_r110	23S ribosomal RNA
289878	+	rRNA		LMOSA_r110	23S ribosomal RNA
289922	+	rRNA		LMOSA_r110	23S ribosomal RNA
289935	+	rRNA		LMOSA_r110	23S ribosomal RNA
289973	+	rRNA		LMOSA_r110	23S ribosomal RNA
289988	+	rRNA		LMOSA_r110	23S ribosomal RNA
290006	+	rRNA		LMOSA_r110	23S ribosomal RNA
290037	+	rRNA		LMOSA_r110	23S ribosomal RNA
290139	+	rRNA		LMOSA_r110	23S ribosomal RNA
290175	+	rRNA		LMOSA_r110	23S ribosomal RNA
290193	+	rRNA		LMOSA_r110	23S ribosomal RNA
290202	+	rRNA		LMOSA_r110	23S ribosomal RNA
290213	+	rRNA		LMOSA_r110	23S ribosomal RNA
290247	+	rRNA		LMOSA_r110	23S ribosomal RNA
290269	+	rRNA		LMOSA_r110	23S ribosomal RNA
290301	+	rRNA		LMOSA_r110	23S ribosomal RNA
290335	+	rRNA		LMOSA_r110	23S ribosomal RNA
290356	+	rRNA		LMOSA_r110	23S ribosomal RNA
290364	+	rRNA		LMOSA_r110	23S ribosomal RNA
290400	+	rRNA		LMOSA_r110	23S ribosomal RNA
290437	+	rRNA		LMOSA_r110	23S ribosomal RNA
290471	+	rRNA		LMOSA_r110	23S ribosomal RNA
290512	+	rRNA		LMOSA_r110	23S ribosomal RNA
290529	+	rRNA		LMOSA_r110	23S ribosomal RNA
290540	+	rRNA		LMOSA_r110	23S ribosomal RNA
290548	+	rRNA		LMOSA_r110	23S ribosomal RNA
290564	+	rRNA		LMOSA_r110	23S ribosomal RNA
290573	+	rRNA		LMOSA_r110	23S ribosomal RNA
290586	+	rRNA		LMOSA_r110	23S ribosomal RNA
290597	+	rRNA		LMOSA_r110	23S ribosomal RNA
290608	+	rRNA		LMOSA_r110	23S ribosomal RNA
290631	+	rRNA		LMOSA_r110	23S ribosomal RNA
290760	+	rRNA		LMOSA_r50	5S ribosomal RNA
290817	+	rRNA		LMOSA_r50	5S ribosomal RNA
290825	+	rRNA		LMOSA_r50	5S ribosomal RNA
437132	-	CDS	EGJ23858.1	LMOSA_12490	Triosephosphate isomerase 2
470485	+	intergenic region
470519	+	CDS	EGJ23895.1	LMOSA_12860	hypothetical protein
470570	+	CDS	EGJ23895.1	LMOSA_12860	hypothetical protein
470594	+	CDS	EGJ23895.1	LMOSA_12860	hypothetical protein
470616	+	CDS	EGJ23895.1	LMOSA_12860	hypothetical protein
470628	+	CDS	EGJ23895.1	LMOSA_12860	hypothetical protein
470679	+	CDS	EGJ23895.1	LMOSA_12860	hypothetical protein
470738	+	CDS	EGJ23895.1	LMOSA_12860	hypothetical protein
470782	+	CDS	EGJ23895.1	LMOSA_12860	hypothetical protein
470801	+	CDS	EGJ23896.1	LMOSA_12870	hypothetical protein
470824	+	CDS	EGJ23896.1	LMOSA_12870	hypothetical protein
470900	+	CDS	EGJ23896.1	LMOSA_12870	hypothetical protein
470986	+	CDS	EGJ23896.1	LMOSA_12870	hypothetical protein
471010	+	CDS	EGJ23896.1	LMOSA_12870	hypothetical protein
471054	+	CDS	EGJ23896.1	LMOSA_12870	hypothetical protein
471103	+	CDS	EGJ23896.1	LMOSA_12870	hypothetical protein
471157	+	CDS	EGJ23896.1	LMOSA_12870	hypothetical protein
471189	+	CDS	EGJ23896.1	LMOSA_12870	hypothetical protein
471226	+	CDS	EGJ23896.1	LMOSA_12870	hypothetical protein
471364	+	CDS	EGJ23896.1	LMOSA_12870	hypothetical protein
471395	+	CDS	EGJ23896.1	LMOSA_12870	hypothetical protein
471464	+	CDS	EGJ23896.1	LMOSA_12870	hypothetical protein
471501	+	CDS	EGJ23896.1	LMOSA_12870	hypothetical protein
471560	+	CDS	EGJ23896.1	LMOSA_12870	hypothetical protein
471614	+	CDS	EGJ23896.1	LMOSA_12870	hypothetical protein
471729	+	CDS	EGJ23896.1	LMOSA_12870	hypothetical protein
471760	+	intergenic region
471880	+	CDS	EGJ23897.1	LMOSA_12880	hypothetical protein
471947	+	CDS	EGJ23897.1	LMOSA_12880	hypothetical protein
471978	+	CDS	EGJ23897.1	LMOSA_12880	hypothetical protein
530257	+	intergenic region
530340	+	intergenic region
530353	+	intergenic region
530365	+	intergenic region
530392	+	intergenic region
530421	+	intergenic region
530435	+	CDS	EGJ23958.1	LMOSA_13470	Internalin-A
530461	+	CDS	EGJ23958.1	LMOSA_13470	Internalin-A
530519	+	CDS	EGJ23958.1	LMOSA_13470	Internalin-A
530550	+	CDS	EGJ23958.1	LMOSA_13470	Internalin-A
530578	+	CDS	EGJ23958.1	LMOSA_13470	Internalin-A
530627	+	CDS	EGJ23958.1	LMOSA_13470	Internalin-A
530792	+	CDS	EGJ23958.1	LMOSA_13470	Internalin-A
530802	+	CDS	EGJ23958.1	LMOSA_13470	Internalin-A
530831	+	CDS	EGJ23958.1	LMOSA_13470	Internalin-A
530888	+	CDS	EGJ23958.1	LMOSA_13470	Internalin-A
530896	+	CDS	EGJ23958.1	LMOSA_13470	Internalin-A
531025	+	CDS	EGJ23958.1	LMOSA_13470	Internalin-A
531039	+	CDS	EGJ23958.1	LMOSA_13470	Internalin-A
531057	+	CDS	EGJ23958.1	LMOSA_13470	Internalin-A
531099	+	CDS	EGJ23958.1	LMOSA_13470	Internalin-A
531123	+	CDS	EGJ23958.1	LMOSA_13470	Internalin-A
531158	+	CDS	EGJ23958.1	LMOSA_13470	Internalin-A
531193	+	CDS	EGJ23958.1	LMOSA_13470	Internalin-A
531228	+	CDS	EGJ23958.1	LMOSA_13470	Internalin-A
531258	+	CDS	EGJ23958.1	LMOSA_13470	Internalin-A
531286	+	CDS	EGJ23958.1	LMOSA_13470	Internalin-A
531352	+	CDS	EGJ23958.1	LMOSA_13470	Internalin-A
531371	+	CDS	EGJ23958.1	LMOSA_13470	Internalin-A
531418	+	CDS	EGJ23958.1	LMOSA_13470	Internalin-A
531488	+	CDS	EGJ23958.1	LMOSA_13470	Internalin-A
531616	+	CDS	EGJ23958.1	LMOSA_13470	Internalin-A
531693	+	CDS	EGJ23958.1	LMOSA_13470	Internalin-A
531705	+	CDS	EGJ23958.1	LMOSA_13470	Internalin-A
531799	+	CDS	EGJ23958.1	LMOSA_13470	Internalin-A
531834	+	CDS	EGJ23958.1	LMOSA_13470	Internalin-A
531945	+	CDS	EGJ23958.1	LMOSA_13470	Internalin-A
532040	+	CDS	EGJ23958.1	LMOSA_13470	Internalin-A
532083	+	CDS	EGJ23958.1	LMOSA_13470	Internalin-A
532156	+	CDS	EGJ23958.1	LMOSA_13470	Internalin-A
532179	+	CDS	EGJ23958.1	LMOSA_13470	Internalin-A
532198	+	CDS	EGJ23958.1	LMOSA_13470	Internalin-A
532250	+	CDS	EGJ23958.1	LMOSA_13470	Internalin-A
532294	+	CDS	EGJ23958.1	LMOSA_13470	Internalin-A
532386	+	CDS	EGJ23958.1	LMOSA_13470	Internalin-A
532436	+	CDS	EGJ23958.1	LMOSA_13470	Internalin-A
532461	+	CDS	EGJ23958.1	LMOSA_13470	Internalin-A
532503	+	CDS	EGJ23958.1	LMOSA_13470	Internalin-A
532541	+	CDS	EGJ23958.1	LMOSA_13470	Internalin-A
532627	+	CDS	EGJ23958.1	LMOSA_13470	Internalin-A
532675	+	CDS	EGJ23958.1	LMOSA_13470	Internalin-A
532689	+	CDS	EGJ23958.1	LMOSA_13470	Internalin-A
532720	+	CDS	EGJ23958.1	LMOSA_13470	Internalin-A
532767	+	CDS	EGJ23958.1	LMOSA_13470	Internalin-A
532786	+	CDS	EGJ23958.1	LMOSA_13470	Internalin-A
532812	+	CDS	EGJ23958.1	LMOSA_13470	Internalin-A
532837	+	intergenic region
532853	+	intergenic region
563122	+	CDS	EGJ23987.1	MOSA_13760
563159	+	CDS	EGJ23987.1	MOSA_13760
563370	+	intergenic region
566481	+	CDS	EGJ23993.1	MOSA_13810
566519	+	CDS	EGJ23993.1	MOSA_13810
566527	+	CDS	EGJ23993.1	MOSA_13810
566543	+	CDS	EGJ23993.1	MOSA_13810
566626	+	CDS	EGJ23993.1	MOSA_13810
566642	+	CDS	EGJ23993.1	MOSA_13810
566664	+	CDS	EGJ23993.1	MOSA_13810
566708	+	CDS	EGJ23993.1	MOSA_13810
566729	+	CDS	EGJ23993.1	MOSA_13810
566771	+	CDS	EGJ23993.1	MOSA_13810
566785	+	CDS	EGJ23993.1	MOSA_13810
566928	+	CDS	EGJ23993.1	MOSA_13810
566977	+	CDS	EGJ23993.1	MOSA_13810
567000	+	CDS	EGJ23993.1	MOSA_13810
567021	+	CDS	EGJ23993.1	MOSA_13810
567125	+	CDS	EGJ23993.1	MOSA_13810
567141	+	CDS	EGJ23993.1	MOSA_13810
567213	+	CDS	EGJ23993.1	MOSA_13810
567231	+	CDS	EGJ23993.1	MOSA_13810
567245	+	CDS	EGJ23993.1	MOSA_13810
567267	+	CDS	EGJ23993.1	MOSA_13810
567281	+	CDS	EGJ23993.1	MOSA_13810
567325	+	CDS	EGJ23994.1	LMOSA_13820	hypothetical protein
567346	+	CDS	EGJ23994.1	LMOSA_13820	hypothetical protein
567436	+	CDS	EGJ23994.1	LMOSA_13820	hypothetical protein
567468	+	CDS	EGJ23994.1	LMOSA_13820	hypothetical protein
567539	+	CDS	EGJ23994.1	LMOSA_13820	hypothetical protein
567576	+	CDS	EGJ23994.1	LMOSA_13820	hypothetical protein
567588	+	CDS	EGJ23994.1	LMOSA_13820	hypothetical protein
567639	+	CDS	EGJ23994.1	LMOSA_13820	hypothetical protein
601912	+	CDS	EGJ24032.1	LMOSA_14200	Universal stress protein family
601973	+	CDS	EGJ24032.1	LMOSA_14200	Universal stress protein family
602034	+	CDS	EGJ24032.1	LMOSA_14200	Universal stress protein family
602046	+	CDS	EGJ24032.1	LMOSA_14200	Universal stress protein family
602108	+	CDS	EGJ24032.1	LMOSA_14200	Universal stress protein family
602212	+	CDS	EGJ24032.1	LMOSA_14200	Universal stress protein family
602222	+	CDS	EGJ24032.1	LMOSA_14200	Universal stress protein family
602234	+	CDS	EGJ24032.1	LMOSA_14200	Universal stress protein family
602250	+	CDS	EGJ24032.1	LMOSA_14200	Universal stress protein family
602304	+	CDS	EGJ24032.1	LMOSA_14200	Universal stress protein family
602320	+	intergenic region
602332	+	intergenic region
629786	+	intergenic region
629862	+	intergenic region
629921	+	CDS	EGJ24056.1	LMOSA_14440	Beta-lactamase
629936	+	CDS	EGJ24056.1	LMOSA_14440	Beta-lactamase
629976	+	CDS	EGJ24056.1	LMOSA_14440	Beta-lactamase
630002	+	CDS	EGJ24056.1	LMOSA_14440	Beta-lactamase
630021	+	CDS	EGJ24056.1	LMOSA_14440	Beta-lactamase
630058	+	CDS	EGJ24056.1	LMOSA_14440	Beta-lactamase
630180	+	CDS	EGJ24056.1	LMOSA_14440	Beta-lactamase
630196	+	CDS	EGJ24056.1	LMOSA_14440	Beta-lactamase
630280	+	CDS	EGJ24056.1	LMOSA_14440	Beta-lactamase
630303	+	CDS	EGJ24056.1	LMOSA_14440	Beta-lactamase
630320	+	CDS	EGJ24056.1	LMOSA_14440	Beta-lactamase
630351	+	CDS	EGJ24056.1	LMOSA_14440	Beta-lactamase
630397	+	CDS	EGJ24056.1	LMOSA_14440	Beta-lactamase
630412	+	CDS	EGJ24056.1	LMOSA_14440	Beta-lactamase
630494	+	CDS	EGJ24056.1	LMOSA_14440	Beta-lactamase
630537	+	CDS	EGJ24056.1	LMOSA_14440	Beta-lactamase
630549	+	CDS	EGJ24056.1	LMOSA_14440	Beta-lactamase
630623	+	CDS	EGJ24056.1	LMOSA_14440	Beta-lactamase
648867	+	intergenic region
675173	+	CDS	EGJ24100.1	LMOSA_14870	Membrane protein YubA
675229	+	CDS	EGJ24100.1	LMOSA_14870	Membrane protein YubA
675256	+	CDS	EGJ24100.1	LMOSA_14870	Membrane protein YubA
729169	+	CDS	EGJ24153.1	MOSA_15400
729328	+	CDS	EGJ24153.1	MOSA_15400
747397	+	CDS	EGJ24170.1	LMOSA_15570	hypothetical protein
747442	+	CDS	EGJ24170.1	LMOSA_15570	hypothetical protein
747460	+	CDS	EGJ24170.1	LMOSA_15570	hypothetical protein
747503	+	CDS	EGJ24170.1	LMOSA_15570	hypothetical protein
747561	+	CDS	EGJ24170.1	LMOSA_15570	hypothetical protein
947412	+	intergenic region
947447	+	intergenic region
947483	+	intergenic region
947491	+	intergenic region
947542	+	intergenic region
970465	+	CDS	EGJ24394.1	LMOSA_17830	Phosphoserine phosphatase rsbU
970571	+	CDS	EGJ24394.1	LMOSA_17830	Phosphoserine phosphatase rsbU
991138	+	intergenic region
991212	+	CDS	EGJ24417.1	LMOSA_18050	Succinate-semialdehyde dehydrogenase
991264	+	CDS	EGJ24417.1	LMOSA_18050	Succinate-semialdehyde dehydrogenase
991407	+	CDS	EGJ24417.1	LMOSA_18050	Succinate-semialdehyde dehydrogenase
991436	+	CDS	EGJ24417.1	LMOSA_18050	Succinate-semialdehyde dehydrogenase
1021401	+	CDS	EGJ24445.1	LMOSA_18330	DNA protection during starvation protein
1021486	+	CDS	EGJ24445.1	LMOSA_18330	DNA protection during starvation protein
1021559	+	CDS	EGJ24445.1	LMOSA_18330	DNA protection during starvation protein
1021588	+	CDS	EGJ24445.1	LMOSA_18330	DNA protection during starvation protein
1021614	+	CDS	EGJ24445.1	LMOSA_18330	DNA protection during starvation protein
1021635	+	CDS	EGJ24445.1	LMOSA_18330	DNA protection during starvation protein
1021818	+	CDS	EGJ24445.1	LMOSA_18330	DNA protection during starvation protein
1021859	+	intergenic region
1030044	+	intergenic region
1030058	+	intergenic region
1030108	+	CDS	EGJ24456.1	LMOSA_18440	hypothetical protein
1030117	+	CDS	EGJ24456.1	LMOSA_18440	hypothetical protein
1030153	+	CDS	EGJ24456.1	LMOSA_18440	hypothetical protein
1030177	+	CDS	EGJ24456.1	LMOSA_18440	hypothetical protein
1030190	+	CDS	EGJ24456.1	LMOSA_18440	hypothetical protein
1030206	+	CDS	EGJ24456.1	LMOSA_18440	hypothetical protein
1030344	+	CDS	EGJ24456.1	LMOSA_18440	hypothetical protein
1030379	+	CDS	EGJ24457.1	LMOSA_18450	hypothetical protein
1030467	+	CDS	EGJ24457.1	LMOSA_18450	hypothetical protein
1030494	+	CDS	EGJ24457.1	LMOSA_18450	hypothetical protein
1030522	+	CDS	EGJ24457.1	LMOSA_18450	hypothetical protein
1030613	+	CDS	EGJ24457.1	LMOSA_18450	hypothetical protein
1030633	+	CDS	EGJ24457.1	LMOSA_18450	hypothetical protein
1030670	+	CDS	EGJ24457.1	LMOSA_18450	hypothetical protein
1030687	+	CDS	EGJ24457.1	LMOSA_18450	hypothetical protein
1030765	+	CDS	EGJ24457.1	LMOSA_18450	hypothetical protein
1030804	+	CDS	EGJ24457.1	LMOSA_18450	hypothetical protein
1030831	+	CDS	EGJ24457.1	LMOSA_18450	hypothetical protein
1030865	+	CDS	EGJ24457.1	LMOSA_18450	hypothetical protein
1030928	+	CDS	EGJ24457.1	LMOSA_18450	hypothetical protein
1030947	+	CDS	EGJ24457.1	LMOSA_18450	hypothetical protein
1030977	+	CDS	EGJ24457.1	LMOSA_18450	hypothetical protein
1030989	+	CDS	EGJ24457.1	LMOSA_18450	hypothetical protein
1030997	+	CDS	EGJ24457.1	LMOSA_18450	hypothetical protein
1031013	+	CDS	EGJ24457.1	LMOSA_18450	hypothetical protein
1031065	+	CDS	EGJ24457.1	LMOSA_18450	hypothetical protein
1031107	+	CDS	EGJ24457.1	LMOSA_18450	hypothetical protein
1031120	+	CDS	EGJ24457.1	LMOSA_18450	hypothetical protein
1031149	+	CDS	EGJ24457.1	LMOSA_18450	hypothetical protein
1039227	-	CDS	EGJ24466.1	LMOSA_18540	hypothetical protein
1039345	-	CDS	EGJ24466.1	LMOSA_18540	hypothetical protein
1039413	-	CDS	EGJ24466.1	LMOSA_18540	hypothetical protein
1039695	-	CDS	EGJ24466.1	LMOSA_18540	hypothetical protein
1039803	-	CDS	EGJ24466.1	LMOSA_18540	hypothetical protein
1039818	-	CDS	EGJ24466.1	LMOSA_18540	hypothetical protein
1039854	-	CDS	EGJ24466.1	LMOSA_18540	hypothetical protein
1039894	-	intergenic region
1039939	-	intergenic region
1045513	-	CDS	EGJ24473.1	LMOSA_18610	Protein DltD
1045557	-	CDS	EGJ24473.1	LMOSA_18610	Protein DltD
1045574	-	CDS	EGJ24473.1	LMOSA_18610	Protein DltD
1045587	-	CDS	EGJ24473.1	LMOSA_18610	Protein DltD
1045763	-	CDS	EGJ24473.1	LMOSA_18610	Protein DltD
1045807	-	CDS	EGJ24473.1	LMOSA_18610	Protein DltD
1045903	-	CDS	EGJ24473.1	LMOSA_18610	Protein DltD
1046020	-	CDS	EGJ24474.1	LMOSA_18620	D-alanine--poly(phosphoribitol) ligase
1046072	-	CDS	EGJ24474.1	LMOSA_18620	D-alanine--poly(phosphoribitol) ligase
1046105	-	CDS	EGJ24474.1	LMOSA_18620	D-alanine--poly(phosphoribitol) ligase
1046131	-	CDS	EGJ24474.1	LMOSA_18620	D-alanine--poly(phosphoribitol) ligase
1046169	-	intergenic region
1046221	-	CDS	EGJ24475.1	LMOSA_18630	Membrane bound O-acyl transferase MBOAT family protein
1046304	-	CDS	EGJ24475.1	LMOSA_18630	Membrane bound O-acyl transferase MBOAT family protein
1046337	-	CDS	EGJ24475.1	LMOSA_18630	Membrane bound O-acyl transferase MBOAT family protein
1046451	-	CDS	EGJ24475.1	LMOSA_18630	Membrane bound O-acyl transferase MBOAT family protein
1046636	-	CDS	EGJ24475.1	LMOSA_18630	Membrane bound O-acyl transferase MBOAT family protein
1047446	-	CDS	EGJ24476.1	LMOSA_18640	D-alanine--poly(phosphoribitol) ligase
1047531	-	CDS	EGJ24476.1	LMOSA_18640	D-alanine--poly(phosphoribitol) ligase
1047549	-	CDS	EGJ24476.1	LMOSA_18640	D-alanine--poly(phosphoribitol) ligase
1047575	-	CDS	EGJ24476.1	LMOSA_18640	D-alanine--poly(phosphoribitol) ligase
1047617	-	CDS	EGJ24476.1	LMOSA_18640	D-alanine--poly(phosphoribitol) ligase
1047706	-	CDS	EGJ24476.1	LMOSA_18640	D-alanine--poly(phosphoribitol) ligase
1047762	-	CDS	EGJ24476.1	LMOSA_18640	D-alanine--poly(phosphoribitol) ligase
1047870	-	CDS	EGJ24476.1	LMOSA_18640	D-alanine--poly(phosphoribitol) ligase
1047932	-	CDS	EGJ24476.1	LMOSA_18640	D-alanine--poly(phosphoribitol) ligase
1048022	-	CDS	EGJ24476.1	LMOSA_18640	D-alanine--poly(phosphoribitol) ligase
1048072	-	CDS	EGJ24476.1	LMOSA_18640	D-alanine--poly(phosphoribitol) ligase
1048139	-	CDS	EGJ24476.1	LMOSA_18640	D-alanine--poly(phosphoribitol) ligase
1048179	-	CDS	EGJ24476.1	LMOSA_18640	D-alanine--poly(phosphoribitol) ligase
1048195	-	CDS	EGJ24476.1	LMOSA_18640	D-alanine--poly(phosphoribitol) ligase
1048268	-	CDS	EGJ24476.1	LMOSA_18640	D-alanine--poly(phosphoribitol) ligase
1048282	-	CDS	EGJ24476.1	LMOSA_18640	D-alanine--poly(phosphoribitol) ligase
1048422	-	CDS	EGJ24476.1	LMOSA_18640	D-alanine--poly(phosphoribitol) ligase
1048451	-	CDS	EGJ24476.1	LMOSA_18640	D-alanine--poly(phosphoribitol) ligase
1048477	-	CDS	EGJ24476.1	LMOSA_18640	D-alanine--poly(phosphoribitol) ligase
1048488	-	CDS	EGJ24476.1	LMOSA_18640	D-alanine--poly(phosphoribitol) ligase
1048524	-	CDS	EGJ24476.1	LMOSA_18640	D-alanine--poly(phosphoribitol) ligase
1048562	-	CDS	EGJ24476.1	LMOSA_18640	D-alanine--poly(phosphoribitol) ligase
1048600	-	CDS	EGJ24476.1	LMOSA_18640	D-alanine--poly(phosphoribitol) ligase
1048632	-	CDS	EGJ24476.1	LMOSA_18640	D-alanine--poly(phosphoribitol) ligase
1048645	-	CDS	EGJ24476.1	LMOSA_18640	D-alanine--poly(phosphoribitol) ligase
1048711	-	CDS	EGJ24476.1	LMOSA_18640	D-alanine--poly(phosphoribitol) ligase
1048783	-	CDS	EGJ24476.1	LMOSA_18640	D-alanine--poly(phosphoribitol) ligase
1048847	-	CDS	EGJ24476.1	LMOSA_18640	D-alanine--poly(phosphoribitol) ligase
1048859	-	CDS	EGJ24476.1	LMOSA_18640	D-alanine--poly(phosphoribitol) ligase
1048930	-	intergenic region
1048971	-	CDS	EGJ24477.1	MOSA_18650
1049102	-	intergenic region
1069986	-	CDS	EGJ24500.1	LMOSA_18880	ATP-dependent Clp protease
1070075	-	CDS	EGJ24500.1	LMOSA_18880	ATP-dependent Clp protease
1070111	-	CDS	EGJ24500.1	LMOSA_18880	ATP-dependent Clp protease
1070138	-	CDS	EGJ24500.1	LMOSA_18880	ATP-dependent Clp protease
1070150	-	CDS	EGJ24500.1	LMOSA_18880	ATP-dependent Clp protease
1070194	-	CDS	EGJ24500.1	LMOSA_18880	ATP-dependent Clp protease
1070267	-	CDS	EGJ24500.1	LMOSA_18880	ATP-dependent Clp protease
1070275	-	CDS	EGJ24500.1	LMOSA_18880	ATP-dependent Clp protease
1070288	-	CDS	EGJ24500.1	LMOSA_18880	ATP-dependent Clp protease
1070323	-	CDS	EGJ24500.1	LMOSA_18880	ATP-dependent Clp protease
1070349	-	CDS	EGJ24500.1	LMOSA_18880	ATP-dependent Clp protease
1070404	-	CDS	EGJ24500.1	LMOSA_18880	ATP-dependent Clp protease
1070426	-	CDS	EGJ24500.1	LMOSA_18880	ATP-dependent Clp protease
1070444	-	CDS	EGJ24500.1	LMOSA_18880	ATP-dependent Clp protease
1070515	-	CDS	EGJ24500.1	LMOSA_18880	ATP-dependent Clp protease
1070584	-	CDS	EGJ24500.1	LMOSA_18880	ATP-dependent Clp protease
1070614	-	CDS	EGJ24500.1	LMOSA_18880	ATP-dependent Clp protease
1070683	-	CDS	EGJ24500.1	LMOSA_18880	ATP-dependent Clp protease
1070703	-	CDS	EGJ24500.1	LMOSA_18880	ATP-dependent Clp protease
1070766	-	CDS	EGJ24500.1	LMOSA_18880	ATP-dependent Clp protease
1070807	-	CDS	EGJ24500.1	LMOSA_18880	ATP-dependent Clp protease
1070816	-	CDS	EGJ24500.1	LMOSA_18880	ATP-dependent Clp protease
1070861	-	CDS	EGJ24500.1	LMOSA_18880	ATP-dependent Clp protease
1070876	-	CDS	EGJ24500.1	LMOSA_18880	ATP-dependent Clp protease
1070886	-	CDS	EGJ24500.1	LMOSA_18880	ATP-dependent Clp protease
1070904	-	CDS	EGJ24500.1	LMOSA_18880	ATP-dependent Clp protease
1071098	-	CDS	EGJ24500.1	LMOSA_18880	ATP-dependent Clp protease
1071153	-	CDS	EGJ24500.1	LMOSA_18880	ATP-dependent Clp protease
1071206	-	CDS	EGJ24500.1	LMOSA_18880	ATP-dependent Clp protease
1071234	-	CDS	EGJ24500.1	LMOSA_18880	ATP-dependent Clp protease
1121053	+	intergenic region
1121117	+	intergenic region
1121192	+	intergenic region
1121225	+	intergenic region
1121929	+	CDS	EGJ24556.1	LMOSA_19440	Pyruvate dehydrogenase E1 component
1121986	+	CDS	EGJ24556.1	LMOSA_19440	Pyruvate dehydrogenase E1 component
1121998	+	CDS	EGJ24556.1	LMOSA_19440	Pyruvate dehydrogenase E1 component
1122063	+	CDS	EGJ24556.1	LMOSA_19440	Pyruvate dehydrogenase E1 component
1122089	+	CDS	EGJ24556.1	LMOSA_19440	Pyruvate dehydrogenase E1 component
1122124	+	CDS	EGJ24556.1	LMOSA_19440	Pyruvate dehydrogenase E1 component
1122206	+	CDS	EGJ24556.1	LMOSA_19440	Pyruvate dehydrogenase E1 component
1122867	+	CDS	EGJ24557.1	LMOSA_19450	Pyruvate dehydrogenase E1 component
1122898	+	CDS	EGJ24557.1	LMOSA_19450	Pyruvate dehydrogenase E1 component
1122952	+	CDS	EGJ24557.1	LMOSA_19450	Pyruvate dehydrogenase E1 component
1123099	+	CDS	EGJ24557.1	LMOSA_19450	Pyruvate dehydrogenase E1 component
1123175	+	CDS	EGJ24557.1	LMOSA_19450	Pyruvate dehydrogenase E1 component
1123330	+	CDS	EGJ24557.1	LMOSA_19450	Pyruvate dehydrogenase E1 component
1123347	+	CDS	EGJ24557.1	LMOSA_19450	Pyruvate dehydrogenase E1 component
1123384	+	CDS	EGJ24557.1	LMOSA_19450	Pyruvate dehydrogenase E1 component
1123441	+	intergenic region
1123590	+	CDS	EGJ24558.1	LMOSA_19460	Dihydrolipoyllysine-residue acetyltransferase
1123607	+	CDS	EGJ24558.1	LMOSA_19460	Dihydrolipoyllysine-residue acetyltransferase
1123681	+	CDS	EGJ24558.1	LMOSA_19460	Dihydrolipoyllysine-residue acetyltransferase
1123732	+	CDS	EGJ24558.1	LMOSA_19460	Dihydrolipoyllysine-residue acetyltransferase
1123779	+	CDS	EGJ24558.1	LMOSA_19460	Dihydrolipoyllysine-residue acetyltransferase
1123918	+	CDS	EGJ24558.1	LMOSA_19460	Dihydrolipoyllysine-residue acetyltransferase
1123982	+	CDS	EGJ24558.1	LMOSA_19460	Dihydrolipoyllysine-residue acetyltransferase
1123993	+	CDS	EGJ24558.1	LMOSA_19460	Dihydrolipoyllysine-residue acetyltransferase
1124011	+	CDS	EGJ24558.1	LMOSA_19460	Dihydrolipoyllysine-residue acetyltransferase
1124237	+	CDS	EGJ24558.1	LMOSA_19460	Dihydrolipoyllysine-residue acetyltransferase
1124263	+	CDS	EGJ24558.1	LMOSA_19460	Dihydrolipoyllysine-residue acetyltransferase
1124387	+	CDS	EGJ24558.1	LMOSA_19460	Dihydrolipoyllysine-residue acetyltransferase
1124425	+	CDS	EGJ24558.1	LMOSA_19460	Dihydrolipoyllysine-residue acetyltransferase
1124475	+	CDS	EGJ24558.1	LMOSA_19460	Dihydrolipoyllysine-residue acetyltransferase
1124535	+	CDS	EGJ24558.1	LMOSA_19460	Dihydrolipoyllysine-residue acetyltransferase
1124675	+	CDS	EGJ24558.1	LMOSA_19460	Dihydrolipoyllysine-residue acetyltransferase
1124731	+	CDS	EGJ24558.1	LMOSA_19460	Dihydrolipoyllysine-residue acetyltransferase
1124801	+	CDS	EGJ24558.1	LMOSA_19460	Dihydrolipoyllysine-residue acetyltransferase
1124937	+	CDS	EGJ24558.1	LMOSA_19460	Dihydrolipoyllysine-residue acetyltransferase
1125154	+	CDS	EGJ24559.1	LMOSA_19470	Dihydrolipoyl dehydrogenase
1125181	+	CDS	EGJ24559.1	LMOSA_19470	Dihydrolipoyl dehydrogenase
1125217	+	CDS	EGJ24559.1	LMOSA_19470	Dihydrolipoyl dehydrogenase
1125348	+	CDS	EGJ24559.1	LMOSA_19470	Dihydrolipoyl dehydrogenase
1125656	+	CDS	EGJ24559.1	LMOSA_19470	Dihydrolipoyl dehydrogenase
1125791	+	CDS	EGJ24559.1	LMOSA_19470	Dihydrolipoyl dehydrogenase
1126000	+	CDS	EGJ24559.1	LMOSA_19470	Dihydrolipoyl dehydrogenase
1126024	+	CDS	EGJ24559.1	LMOSA_19470	Dihydrolipoyl dehydrogenase
1126033	+	CDS	EGJ24559.1	LMOSA_19470	Dihydrolipoyl dehydrogenase
1126193	+	CDS	EGJ24559.1	LMOSA_19470	Dihydrolipoyl dehydrogenase
1214641	+	intergenic region
1214676	+	intergenic region
1214730	+	intergenic region
1214809	+	intergenic region
1214834	+	intergenic region
1214870	+	intergenic region
1214880	+	intergenic region
1214904	+	intergenic region
1216690	+	CDS	EGJ24653.1	LMOSA_20390	Response regulator
1216742	+	CDS	EGJ24653.1	LMOSA_20390	Response regulator
1216866	+	CDS	EGJ24653.1	LMOSA_20390	Response regulator
1216881	+	CDS	EGJ24653.1	LMOSA_20390	Response regulator
1216892	+	CDS	EGJ24653.1	LMOSA_20390	Response regulator
1217091	+	CDS	EGJ24653.1	LMOSA_20390	Response regulator
1217118	+	CDS	EGJ24653.1	LMOSA_20390	Response regulator
1217243	+	CDS	EGJ24654.1	LMOSA_20400	Sensor histidine kinase
1217257	+	CDS	EGJ24654.1	LMOSA_20400	Sensor histidine kinase
1217600	+	CDS	EGJ24654.1	LMOSA_20400	Sensor histidine kinase
1217636	+	CDS	EGJ24654.1	LMOSA_20400	Sensor histidine kinase
1217769	+	CDS	EGJ24654.1	LMOSA_20400	Sensor histidine kinase
1217889	+	CDS	EGJ24654.1	LMOSA_20400	Sensor histidine kinase
1218022	+	CDS	EGJ24654.1	LMOSA_20400	Sensor histidine kinase
1218064	+	CDS	EGJ24654.1	LMOSA_20400	Sensor histidine kinase
1218150	+	CDS	EGJ24654.1	LMOSA_20400	Sensor histidine kinase
1255224	+	CDS	EGJ24700.1	LMOSA_20860	hypothetical transcriptional regulator
1255325	+	CDS	EGJ24700.1	LMOSA_20860	hypothetical transcriptional regulator
1255333	+	CDS	EGJ24700.1	LMOSA_20860	hypothetical transcriptional regulator
1255451	+	CDS	EGJ24700.1	LMOSA_20860	hypothetical transcriptional regulator
1255477	+	CDS	EGJ24700.1	LMOSA_20860	hypothetical transcriptional regulator
1255492	+	CDS	EGJ24700.1	LMOSA_20860	hypothetical transcriptional regulator
1255508	+	CDS	EGJ24700.1	LMOSA_20860	hypothetical transcriptional regulator
1274535	+	CDS	EGJ24713.1	LMOSA_20990	Thioredoxin
1274596	+	CDS	EGJ24713.1	LMOSA_20990	Thioredoxin
1283398	-	intergenic region
1283451	-	CDS	EGJ24724.1	LMOSA_21100	hypothetical protein
1283571	-	CDS	EGJ24724.1	LMOSA_21100	hypothetical protein
1283587	-	CDS	EGJ24724.1	LMOSA_21100	hypothetical protein
1283620	-	CDS	EGJ24724.1	LMOSA_21100	hypothetical protein
1283705	-	CDS	EGJ24724.1	LMOSA_21100	hypothetical protein
1283752	-	CDS	EGJ24724.1	LMOSA_21100	hypothetical protein
1283892	-	CDS	EGJ24724.1	LMOSA_21100	hypothetical protein
1339587	-	CDS	EGJ24798.1	LMOSA_21820	hypothetical protein
1339658	-	CDS	EGJ24798.1	LMOSA_21820	hypothetical protein
1339760	-	CDS	EGJ24798.1	LMOSA_21820	hypothetical protein
1339790	-	CDS	EGJ24798.1	LMOSA_21820	hypothetical protein
1339826	-	CDS	EGJ24798.1	LMOSA_21820	hypothetical protein
1376526	+	CDS	EGJ24832.1	LMOSA_22160	Aerobic glycerol-3-phosphate dehydrogenase
1376561	+	CDS	EGJ24832.1	LMOSA_22160	Aerobic glycerol-3-phosphate dehydrogenase
1376612	+	CDS	EGJ24832.1	LMOSA_22160	Aerobic glycerol-3-phosphate dehydrogenase
1376769	+	CDS	EGJ24832.1	LMOSA_22160	Aerobic glycerol-3-phosphate dehydrogenase
1376814	+	CDS	EGJ24832.1	LMOSA_22160	Aerobic glycerol-3-phosphate dehydrogenase
1406495	+	CDS	EGJ24859.1	LMOSA_22440	Ribosome maturation factor rimP
1406542	+	CDS	EGJ24859.1	LMOSA_22440	Ribosome maturation factor rimP
1406581	+	CDS	EGJ24859.1	LMOSA_22440	Ribosome maturation factor rimP
1406618	+	CDS	EGJ24859.1	LMOSA_22440	Ribosome maturation factor rimP
1406657	+	CDS	EGJ24859.1	LMOSA_22440	Ribosome maturation factor rimP
1406685	+	CDS	EGJ24859.1	LMOSA_22440	Ribosome maturation factor rimP
1406720	+	CDS	EGJ24859.1	LMOSA_22440	Ribosome maturation factor rimP
1428457	+	CDS	EGJ24884.1	LMOSA_22690	Aminomethyltransferase
1428504	+	CDS	EGJ24884.1	LMOSA_22690	Aminomethyltransferase
1428545	+	CDS	EGJ24884.1	LMOSA_22690	Aminomethyltransferase
1428585	+	CDS	EGJ24884.1	LMOSA_22690	Aminomethyltransferase
1428636	+	CDS	EGJ24884.1	LMOSA_22690	Aminomethyltransferase
1428683	+	CDS	EGJ24884.1	LMOSA_22690	Aminomethyltransferase
1428726	+	CDS	EGJ24884.1	LMOSA_22690	Aminomethyltransferase
1442029	+	intergenic region
1442041	+	intergenic region
1442086	+	CDS	EGJ24900.1	LMOSA_22850	Cold shock-like protein CspLA
1442105	+	CDS	EGJ24900.1	LMOSA_22850	Cold shock-like protein CspLA
1442142	+	CDS	EGJ24900.1	LMOSA_22850	Cold shock-like protein CspLA
1442179	+	CDS	EGJ24900.1	LMOSA_22850	Cold shock-like protein CspLA
1442196	+	CDS	EGJ24900.1	LMOSA_22850	Cold shock-like protein CspLA
1442208	+	CDS	EGJ24900.1	LMOSA_22850	Cold shock-like protein CspLA
1442225	+	CDS	EGJ24900.1	LMOSA_22850	Cold shock-like protein CspLA
1442290	+	intergenic region
1468799	+	CDS	EGJ24924.1	LMOSA_23090	CD4+ T-cell-stimulating antigen
1468812	+	CDS	EGJ24924.1	LMOSA_23090	CD4+ T-cell-stimulating antigen
1468858	+	CDS	EGJ24924.1	LMOSA_23090	CD4+ T-cell-stimulating antigen
1468887	+	CDS	EGJ24924.1	LMOSA_23090	CD4+ T-cell-stimulating antigen
1468901	+	CDS	EGJ24924.1	LMOSA_23090	CD4+ T-cell-stimulating antigen
1468925	+	CDS	EGJ24924.1	LMOSA_23090	CD4+ T-cell-stimulating antigen
1469032	+	CDS	EGJ24924.1	LMOSA_23090	CD4+ T-cell-stimulating antigen
1469047	+	CDS	EGJ24924.1	LMOSA_23090	CD4+ T-cell-stimulating antigen
1469057	+	CDS	EGJ24924.1	LMOSA_23090	CD4+ T-cell-stimulating antigen
1469101	+	CDS	EGJ24924.1	LMOSA_23090	CD4+ T-cell-stimulating antigen
1469113	+	CDS	EGJ24924.1	LMOSA_23090	CD4+ T-cell-stimulating antigen
1469130	+	CDS	EGJ24924.1	LMOSA_23090	CD4+ T-cell-stimulating antigen
1469209	+	CDS	EGJ24924.1	LMOSA_23090	CD4+ T-cell-stimulating antigen
1469227	+	CDS	EGJ24924.1	LMOSA_23090	CD4+ T-cell-stimulating antigen
1469295	+	CDS	EGJ24924.1	LMOSA_23090	CD4+ T-cell-stimulating antigen
1469366	+	CDS	EGJ24924.1	LMOSA_23090	CD4+ T-cell-stimulating antigen
1469430	+	CDS	EGJ24924.1	LMOSA_23090	CD4+ T-cell-stimulating antigen
1469440	+	CDS	EGJ24924.1	LMOSA_23090	CD4+ T-cell-stimulating antigen
1469505	+	CDS	EGJ24924.1	LMOSA_23090	CD4+ T-cell-stimulating antigen
1469541	+	CDS	EGJ24924.1	LMOSA_23090	CD4+ T-cell-stimulating antigen
1469559	+	CDS	EGJ24924.1	LMOSA_23090	CD4+ T-cell-stimulating antigen
1469574	+	CDS	EGJ24924.1	LMOSA_23090	CD4+ T-cell-stimulating antigen
1469585	+	CDS	EGJ24924.1	LMOSA_23090	CD4+ T-cell-stimulating antigen
1469617	+	CDS	EGJ24924.1	LMOSA_23090	CD4+ T-cell-stimulating antigen
1469653	+	CDS	EGJ24924.1	LMOSA_23090	CD4+ T-cell-stimulating antigen
1469664	+	CDS	EGJ24924.1	LMOSA_23090	CD4+ T-cell-stimulating antigen
1469675	+	CDS	EGJ24924.1	LMOSA_23090	CD4+ T-cell-stimulating antigen
1469743	+	CDS	EGJ24924.1	LMOSA_23090	CD4+ T-cell-stimulating antigen
1469763	+	CDS	EGJ24924.1	LMOSA_23090	CD4+ T-cell-stimulating antigen
1469771	+	CDS	EGJ24924.1	LMOSA_23090	CD4+ T-cell-stimulating antigen
1469795	+	intergenic region
1469816	+	intergenic region
1469824	+	intergenic region
1469832	+	intergenic region
1476673	+	CDS	EGJ24930.1	LMOSA_23150	3-ketoacyl-acyl carrier protein reductase
1476748	+	CDS	EGJ24930.1	LMOSA_23150	3-ketoacyl-acyl carrier protein reductase
1490746	+	CDS	EGJ24942.1	LMOSA_23270	Formate acetyltransferase
1491034	+	CDS	EGJ24942.1	LMOSA_23270	Formate acetyltransferase
1491067	+	CDS	EGJ24942.1	LMOSA_23270	Formate acetyltransferase
1509683	-	CDS	EGJ24959.1	LMOSA_23440	hypothetical protein
1509734	-	CDS	EGJ24959.1	LMOSA_23440	hypothetical protein
1509759	-	CDS	EGJ24959.1	LMOSA_23440	hypothetical protein
1509829	-	CDS	EGJ24959.1	LMOSA_23440	hypothetical protein
1509844	-	CDS	EGJ24959.1	LMOSA_23440	hypothetical protein
1509856	-	CDS	EGJ24959.1	LMOSA_23440	hypothetical protein
1510102	-	CDS	EGJ24959.1	LMOSA_23440	hypothetical protein
1510137	-	CDS	EGJ24959.1	LMOSA_23440	hypothetical protein
1510157	-	CDS	EGJ24959.1	LMOSA_23440	hypothetical protein
1510188	-	CDS	EGJ24959.1	LMOSA_23440	hypothetical protein
1528399	-	CDS	EGJ24975.1	LMOSA_23600	Superoxide dismutase
1535097	-	CDS	EGJ24983.1	LMOSA_23680	Zinc uptake system ATP-binding protein ZurA
1555106	-	CDS	EGJ25002.1	LMOSA_23870	HDIG domain membrane protein
1555360	-	CDS	EGJ25003.1	LMOSA_23880	PhoH
1555406	-	CDS	EGJ25003.1	LMOSA_23880	PhoH
1555454	-	CDS	EGJ25003.1	LMOSA_23880	PhoH
1555552	-	CDS	EGJ25003.1	LMOSA_23880	PhoH
1555561	-	CDS	EGJ25003.1	LMOSA_23880	PhoH
1556399	-	CDS	EGJ25004.1	MOSA_23890
1556439	-	intergenic region
1556539	-	CDS	EGJ25005.1	LMOSA_23900	GatB/Yqey domain protein
1556558	-	CDS	EGJ25005.1	LMOSA_23900	GatB/Yqey domain protein
1556572	-	CDS	EGJ25005.1	LMOSA_23900	GatB/Yqey domain protein
1556654	-	CDS	EGJ25005.1	LMOSA_23900	GatB/Yqey domain protein
1556668	-	CDS	EGJ25005.1	LMOSA_23900	GatB/Yqey domain protein
1556685	-	CDS	EGJ25005.1	LMOSA_23900	GatB/Yqey domain protein
1556700	-	CDS	EGJ25005.1	LMOSA_23900	GatB/Yqey domain protein
1556716	-	CDS	EGJ25005.1	LMOSA_23900	GatB/Yqey domain protein
1556752	-	CDS	EGJ25005.1	LMOSA_23900	GatB/Yqey domain protein
1556846	-	CDS	EGJ25005.1	LMOSA_23900	GatB/Yqey domain protein
1556944	-	CDS	EGJ25006.1	LMOSA_23910	30S ribosomal protein S21
1557021	-	CDS	EGJ25006.1	LMOSA_23910	30S ribosomal protein S21
1557054	-	CDS	EGJ25006.1	LMOSA_23910	30S ribosomal protein S21
1557080	-	CDS	EGJ25006.1	LMOSA_23910	30S ribosomal protein S21
1557092	-	CDS	EGJ25006.1	LMOSA_23910	30S ribosomal protein S21
1560753	-	CDS	EGJ25010.1	LMOSA_23950	Chaperone protein dnaK
1586469	-	CDS	EGJ25038.1	LMOSA_24230	hypothetical protein
1586511	-	CDS	EGJ25038.1	LMOSA_24230	hypothetical protein
1586549	-	CDS	EGJ25038.1	LMOSA_24230	hypothetical protein
1586650	-	CDS	EGJ25038.1	LMOSA_24230	hypothetical protein
1586690	-	CDS	EGJ25038.1	LMOSA_24230	hypothetical protein
1586814	-	CDS	EGJ25039.1	LMOSA_24240	Putative Holliday junction resolvase
1586858	-	CDS	EGJ25039.1	LMOSA_24240	Putative Holliday junction resolvase
1586897	-	CDS	EGJ25039.1	LMOSA_24240	Putative Holliday junction resolvase
1586942	-	CDS	EGJ25039.1	LMOSA_24240	Putative Holliday junction resolvase
1587019	-	CDS	EGJ25039.1	LMOSA_24240	Putative Holliday junction resolvase
1587242	-	CDS	EGJ25040.1	LMOSA_24250	hypothetical protein
1587331	-	CDS	EGJ25040.1	LMOSA_24250	hypothetical protein
1587391	-	CDS	EGJ25040.1	LMOSA_24250	hypothetical protein
1587409	-	CDS	EGJ25040.1	LMOSA_24250	hypothetical protein
1587438	-	CDS	EGJ25040.1	LMOSA_24250	hypothetical protein
1587465	-	intergenic region
1601394	-	intergenic region
1601422	-	intergenic region
1601455	-	intergenic region
1601472	-	intergenic region
1601511	-	intergenic region
1601530	-	intergenic region
1601560	-	intergenic region
1610421	+	CDS	EGJ25058.1	LMOSA_24430	N-acetylmuramoyl-L-alanine amidase
1610542	+	CDS	EGJ25058.1	LMOSA_24430	N-acetylmuramoyl-L-alanine amidase
1610654	+	CDS	EGJ25058.1	LMOSA_24430	N-acetylmuramoyl-L-alanine amidase
1610662	+	CDS	EGJ25058.1	LMOSA_24430	N-acetylmuramoyl-L-alanine amidase
1677807	+	CDS	EGJ25117.1	LMOSA_25020	Universal stress protein family
1677855	+	CDS	EGJ25117.1	LMOSA_25020	Universal stress protein family
1677869	+	CDS	EGJ25117.1	LMOSA_25020	Universal stress protein family
1677878	+	CDS	EGJ25117.1	LMOSA_25020	Universal stress protein family
1677936	+	CDS	EGJ25117.1	LMOSA_25020	Universal stress protein family
1677952	+	CDS	EGJ25117.1	LMOSA_25020	Universal stress protein family
1677970	+	CDS	EGJ25117.1	LMOSA_25020	Universal stress protein family
1678011	+	CDS	EGJ25117.1	LMOSA_25020	Universal stress protein family
1678047	+	CDS	EGJ25117.1	LMOSA_25020	Universal stress protein family
1678063	+	CDS	EGJ25117.1	LMOSA_25020	Universal stress protein family
1678103	+	intergenic region
1696513	-	CDS	EGJ25135.1	LMOSA_25200	Catabolite control protein A
1696668	-	CDS	EGJ25135.1	LMOSA_25200	Catabolite control protein A
1696737	-	CDS	EGJ25135.1	LMOSA_25200	Catabolite control protein A
1697035	-	CDS	EGJ25135.1	LMOSA_25200	Catabolite control protein A
1699057	-	CDS	EGJ25137.1	LMOSA_25220	hypothetical protein
1699100	-	CDS	EGJ25137.1	LMOSA_25220	hypothetical protein
1699124	-	CDS	EGJ25137.1	LMOSA_25220	hypothetical protein
1699163	-	CDS	EGJ25137.1	LMOSA_25220	hypothetical protein
1699195	-	CDS	EGJ25137.1	LMOSA_25220	hypothetical protein
1699260	-	CDS	EGJ25137.1	LMOSA_25220	hypothetical protein
1699290	-	CDS	EGJ25137.1	LMOSA_25220	hypothetical protein
1699348	-	CDS	EGJ25137.1	LMOSA_25220	hypothetical protein
1699369	-	CDS	EGJ25137.1	LMOSA_25220	hypothetical protein
1699544	-	CDS	EGJ25138.1	LMOSA_25230	General stress protein
1699565	-	CDS	EGJ25138.1	LMOSA_25230	General stress protein
1699604	-	CDS	EGJ25138.1	LMOSA_25230	General stress protein
1699757	-	CDS	EGJ25138.1	LMOSA_25230	General stress protein
1699794	-	CDS	EGJ25138.1	LMOSA_25230	General stress protein
1699819	-	CDS	EGJ25138.1	LMOSA_25230	General stress protein
1699862	-	CDS	EGJ25138.1	LMOSA_25230	General stress protein
1699893	-	CDS	EGJ25138.1	LMOSA_25230	General stress protein
1731536	+	CDS	EGJ25171.1	LMOSA_25560	Alcohol dehydrogenase
1731679	+	CDS	EGJ25171.1	LMOSA_25560	Alcohol dehydrogenase
1731789	+	CDS	EGJ25171.1	LMOSA_25560	Alcohol dehydrogenase
1731872	+	CDS	EGJ25171.1	LMOSA_25560	Alcohol dehydrogenase
1731912	+	CDS	EGJ25171.1	LMOSA_25560	Alcohol dehydrogenase
1732437	+	CDS	EGJ25171.1	LMOSA_25560	Alcohol dehydrogenase
1732473	+	CDS	EGJ25171.1	LMOSA_25560	Alcohol dehydrogenase
1732540	+	CDS	EGJ25171.1	LMOSA_25560	Alcohol dehydrogenase
1732740	+	CDS	EGJ25171.1	LMOSA_25560	Alcohol dehydrogenase
1732827	+	CDS	EGJ25171.1	LMOSA_25560	Alcohol dehydrogenase
1760536	-	CDS	EGJ25193.1	LMOSA_25780	30S ribosomal protein S2
1760552	-	CDS	EGJ25193.1	LMOSA_25780	30S ribosomal protein S2
1760568	-	CDS	EGJ25193.1	LMOSA_25780	30S ribosomal protein S2
1760621	-	CDS	EGJ25193.1	LMOSA_25780	30S ribosomal protein S2
1760762	-	CDS	EGJ25193.1	LMOSA_25780	30S ribosomal protein S2
1760773	-	CDS	EGJ25193.1	LMOSA_25780	30S ribosomal protein S2
1760796	-	CDS	EGJ25193.1	LMOSA_25780	30S ribosomal protein S2
1760968	-	intergenic region
1760989	-	intergenic region
1761005	-	intergenic region
1761049	-	intergenic region
1761067	-	intergenic region
1799195	-	rRNA		LMOSA_r30	5S ribosomal RNA
1799203	-	rRNA		LMOSA_r30	5S ribosomal RNA
1799372	-	rRNA		LMOSA_r90	23S ribosomal RNA
1799390	-	rRNA		LMOSA_r90	23S ribosomal RNA
1799413	-	rRNA		LMOSA_r90	23S ribosomal RNA
1799424	-	rRNA		LMOSA_r90	23S ribosomal RNA
1799435	-	rRNA		LMOSA_r90	23S ribosomal RNA
1799448	-	rRNA		LMOSA_r90	23S ribosomal RNA
1799457	-	rRNA		LMOSA_r90	23S ribosomal RNA
1799473	-	rRNA		LMOSA_r90	23S ribosomal RNA
1799481	-	rRNA		LMOSA_r90	23S ribosomal RNA
1799492	-	rRNA		LMOSA_r90	23S ribosomal RNA
1799509	-	rRNA		LMOSA_r90	23S ribosomal RNA
1799550	-	rRNA		LMOSA_r90	23S ribosomal RNA
1799584	-	rRNA		LMOSA_r90	23S ribosomal RNA
1799621	-	rRNA		LMOSA_r90	23S ribosomal RNA
1799657	-	rRNA		LMOSA_r90	23S ribosomal RNA
1799665	-	rRNA		LMOSA_r90	23S ribosomal RNA
1799686	-	rRNA		LMOSA_r90	23S ribosomal RNA
1799720	-	rRNA		LMOSA_r90	23S ribosomal RNA
1799752	-	rRNA		LMOSA_r90	23S ribosomal RNA
1799766	-	rRNA		LMOSA_r90	23S ribosomal RNA
1799774	-	rRNA		LMOSA_r90	23S ribosomal RNA
1799808	-	rRNA		LMOSA_r90	23S ribosomal RNA
1799819	-	rRNA		LMOSA_r90	23S ribosomal RNA
1799828	-	rRNA		LMOSA_r90	23S ribosomal RNA
1799846	-	rRNA		LMOSA_r90	23S ribosomal RNA
1799882	-	rRNA		LMOSA_r90	23S ribosomal RNA
1799984	-	rRNA		LMOSA_r90	23S ribosomal RNA
1800015	-	rRNA		LMOSA_r90	23S ribosomal RNA
1800033	-	rRNA		LMOSA_r90	23S ribosomal RNA
1800048	-	rRNA		LMOSA_r90	23S ribosomal RNA
1800086	-	rRNA		LMOSA_r90	23S ribosomal RNA
1800099	-	rRNA		LMOSA_r90	23S ribosomal RNA
1800143	-	rRNA		LMOSA_r90	23S ribosomal RNA
1800171	-	rRNA		LMOSA_r90	23S ribosomal RNA
1800200	-	rRNA		LMOSA_r90	23S ribosomal RNA
1800221	-	rRNA		LMOSA_r90	23S ribosomal RNA
1800276	-	rRNA		LMOSA_r90	23S ribosomal RNA
1800287	-	rRNA		LMOSA_r90	23S ribosomal RNA
1800337	-	rRNA		LMOSA_r90	23S ribosomal RNA
1800347	-	rRNA		LMOSA_r90	23S ribosomal RNA
1800360	-	rRNA		LMOSA_r90	23S ribosomal RNA
1800397	-	rRNA		LMOSA_r90	23S ribosomal RNA
1800426	-	rRNA		LMOSA_r90	23S ribosomal RNA
1800489	-	rRNA		LMOSA_r90	23S ribosomal RNA
1800521	-	rRNA		LMOSA_r90	23S ribosomal RNA
1800594	-	rRNA		LMOSA_r90	23S ribosomal RNA
1800604	-	rRNA		LMOSA_r90	23S ribosomal RNA
1800616	-	rRNA		LMOSA_r90	23S ribosomal RNA
1800653	-	rRNA		LMOSA_r90	23S ribosomal RNA
1800668	-	rRNA		LMOSA_r90	23S ribosomal RNA
1800694	-	rRNA		LMOSA_r90	23S ribosomal RNA
1800716	-	rRNA		LMOSA_r90	23S ribosomal RNA
1800725	-	rRNA		LMOSA_r90	23S ribosomal RNA
1800752	-	rRNA		LMOSA_r90	23S ribosomal RNA
1800775	-	rRNA		LMOSA_r90	23S ribosomal RNA
1800802	-	rRNA		LMOSA_r90	23S ribosomal RNA
1800820	-	rRNA		LMOSA_r90	23S ribosomal RNA
1800839	-	rRNA		LMOSA_r90	23S ribosomal RNA
1800857	-	rRNA		LMOSA_r90	23S ribosomal RNA
1800865	-	rRNA		LMOSA_r90	23S ribosomal RNA
1800879	-	rRNA		LMOSA_r90	23S ribosomal RNA
1800961	-	rRNA		LMOSA_r90	23S ribosomal RNA
1800974	-	rRNA		LMOSA_r90	23S ribosomal RNA
1800999	-	rRNA		LMOSA_r90	23S ribosomal RNA
1801007	-	rRNA		LMOSA_r90	23S ribosomal RNA
1801021	-	rRNA		LMOSA_r90	23S ribosomal RNA
1801064	-	rRNA		LMOSA_r90	23S ribosomal RNA
1801079	-	rRNA		LMOSA_r90	23S ribosomal RNA
1801115	-	rRNA		LMOSA_r90	23S ribosomal RNA
1801153	-	rRNA		LMOSA_r90	23S ribosomal RNA
1801175	-	rRNA		LMOSA_r90	23S ribosomal RNA
1801184	-	rRNA		LMOSA_r90	23S ribosomal RNA
1801245	-	rRNA		LMOSA_r90	23S ribosomal RNA
1801282	-	rRNA		LMOSA_r90	23S ribosomal RNA
1801302	-	rRNA		LMOSA_r90	23S ribosomal RNA
1801337	-	rRNA		LMOSA_r90	23S ribosomal RNA
1801376	-	rRNA		LMOSA_r90	23S ribosomal RNA
1801405	-	rRNA		LMOSA_r90	23S ribosomal RNA
1801482	-	rRNA		LMOSA_r90	23S ribosomal RNA
1801497	-	rRNA		LMOSA_r90	23S ribosomal RNA
1801540	-	rRNA		LMOSA_r90	23S ribosomal RNA
1801557	-	rRNA		LMOSA_r90	23S ribosomal RNA
1801588	-	rRNA		LMOSA_r90	23S ribosomal RNA
1801615	-	rRNA		LMOSA_r90	23S ribosomal RNA
1801636	-	rRNA		LMOSA_r90	23S ribosomal RNA
1801646	-	rRNA		LMOSA_r90	23S ribosomal RNA
1801672	-	rRNA		LMOSA_r90	23S ribosomal RNA
1801710	-	rRNA		LMOSA_r90	23S ribosomal RNA
1801762	-	rRNA		LMOSA_r90	23S ribosomal RNA
1801786	-	rRNA		LMOSA_r90	23S ribosomal RNA
1801814	-	rRNA		LMOSA_r90	23S ribosomal RNA
1801837	-	rRNA		LMOSA_r90	23S ribosomal RNA
1801851	-	rRNA		LMOSA_r90	23S ribosomal RNA
1801902	-	rRNA		LMOSA_r90	23S ribosomal RNA
1801917	-	rRNA		LMOSA_r90	23S ribosomal RNA
1801957	-	rRNA		LMOSA_r90	23S ribosomal RNA
1801992	-	rRNA		LMOSA_r90	23S ribosomal RNA
1802008	-	rRNA		LMOSA_r90	23S ribosomal RNA
1802029	-	rRNA		LMOSA_r90	23S ribosomal RNA
1802084	-	rRNA		LMOSA_r90	23S ribosomal RNA
1802102	-	rRNA		LMOSA_r90	23S ribosomal RNA
1802115	-	rRNA		LMOSA_r90	23S ribosomal RNA
1802149	-	rRNA		LMOSA_r90	23S ribosomal RNA
1802207	-	rRNA		LMOSA_r90	23S ribosomal RNA
1802220	-	rRNA		LMOSA_r90	23S ribosomal RNA
1802262	-	rRNA		LMOSA_r90	23S ribosomal RNA
1802529	-	intergenic region
1802547	-	rRNA		LMOSA_r150	16S ribosomal RNA
1802562	-	rRNA		LMOSA_r150	16S ribosomal RNA
1802582	-	rRNA		LMOSA_r150	16S ribosomal RNA
1802646	-	rRNA		LMOSA_r150	16S ribosomal RNA
1802670	-	rRNA		LMOSA_r150	16S ribosomal RNA
1802717	-	rRNA		LMOSA_r150	16S ribosomal RNA
1802749	-	rRNA		LMOSA_r150	16S ribosomal RNA
1802785	-	rRNA		LMOSA_r150	16S ribosomal RNA
1802804	-	rRNA		LMOSA_r150	16S ribosomal RNA
1802840	-	rRNA		LMOSA_r150	16S ribosomal RNA
1802891	-	rRNA		LMOSA_r150	16S ribosomal RNA
1802953	-	rRNA		LMOSA_r150	16S ribosomal RNA
1802964	-	rRNA		LMOSA_r150	16S ribosomal RNA
1802994	-	rRNA		LMOSA_r150	16S ribosomal RNA
1803017	-	rRNA		LMOSA_r150	16S ribosomal RNA
1803030	-	rRNA		LMOSA_r150	16S ribosomal RNA
1803039	-	rRNA		LMOSA_r150	16S ribosomal RNA
1803060	-	rRNA		LMOSA_r150	16S ribosomal RNA
1803114	-	rRNA		LMOSA_r150	16S ribosomal RNA
1803133	-	rRNA		LMOSA_r150	16S ribosomal RNA
1803195	-	rRNA		LMOSA_r150	16S ribosomal RNA
1803211	-	rRNA		LMOSA_r150	16S ribosomal RNA
1803219	-	rRNA		LMOSA_r150	16S ribosomal RNA
1803247	-	rRNA		LMOSA_r150	16S ribosomal RNA
1803278	-	rRNA		LMOSA_r150	16S ribosomal RNA
1803288	-	rRNA		LMOSA_r150	16S ribosomal RNA
1803302	-	rRNA		LMOSA_r150	16S ribosomal RNA
1803368	-	rRNA		LMOSA_r150	16S ribosomal RNA
1803376	-	rRNA		LMOSA_r150	16S ribosomal RNA
1803385	-	rRNA		LMOSA_r150	16S ribosomal RNA
1803417	-	rRNA		LMOSA_r150	16S ribosomal RNA
1803452	-	rRNA		LMOSA_r150	16S ribosomal RNA
1803463	-	rRNA		LMOSA_r150	16S ribosomal RNA
1803471	-	rRNA		LMOSA_r150	16S ribosomal RNA
1803481	-	rRNA		LMOSA_r150	16S ribosomal RNA
1803553	-	rRNA		LMOSA_r150	16S ribosomal RNA
1803561	-	rRNA		LMOSA_r150	16S ribosomal RNA
1803615	-	rRNA		LMOSA_r150	16S ribosomal RNA
1803633	-	rRNA		LMOSA_r150	16S ribosomal RNA
1803648	-	rRNA		LMOSA_r150	16S ribosomal RNA
1803666	-	rRNA		LMOSA_r150	16S ribosomal RNA
1803699	-	rRNA		LMOSA_r150	16S ribosomal RNA
1803731	-	rRNA		LMOSA_r150	16S ribosomal RNA
1803742	-	rRNA		LMOSA_r150	16S ribosomal RNA
1803773	-	rRNA		LMOSA_r150	16S ribosomal RNA
1803817	-	rRNA		LMOSA_r150	16S ribosomal RNA
1803850	-	rRNA		LMOSA_r150	16S ribosomal RNA
1803873	-	rRNA		LMOSA_r150	16S ribosomal RNA
1803906	-	rRNA		LMOSA_r150	16S ribosomal RNA
1803914	-	rRNA		LMOSA_r150	16S ribosomal RNA
1803938	-	rRNA		LMOSA_r150	16S ribosomal RNA
1803946	-	rRNA		LMOSA_r150	16S ribosomal RNA
1803971	-	rRNA		LMOSA_r150	16S ribosomal RNA
1803979	-	rRNA		LMOSA_r150	16S ribosomal RNA
1803993	-	rRNA		LMOSA_r150	16S ribosomal RNA
1811366	+	intergenic region
1811411	+	intergenic region
1811420	+	CDS	EGJ25227.1	LMOSA_26130	hypothetical protein yfhP
1811520	+	CDS	EGJ25227.1	LMOSA_26130	hypothetical protein yfhP
1811535	+	CDS	EGJ25227.1	LMOSA_26130	hypothetical protein yfhP
1811777	+	CDS	EGJ25227.1	LMOSA_26130	hypothetical protein yfhP
1811960	+	CDS	EGJ25227.1	LMOSA_26130	hypothetical protein yfhP
1812142	+	CDS	EGJ25227.1	LMOSA_26130	hypothetical protein yfhP
1843589	-	CDS	EGJ25262.1	LMOSA_26480	Oxidoreductase
1843663	-	CDS	EGJ25262.1	LMOSA_26480	Oxidoreductase
1843736	-	CDS	EGJ25262.1	LMOSA_26480	Oxidoreductase
1843764	-	CDS	EGJ25262.1	LMOSA_26480	Oxidoreductase
1903876	-	rRNA		LMOSA_r40	5S ribosomal RNA
1903884	-	rRNA		LMOSA_r40	5S ribosomal RNA
1903941	-	rRNA		LMOSA_r40	5S ribosomal RNA
1904052	-	rRNA		LMOSA_r100	23S ribosomal RNA
1904070	-	rRNA		LMOSA_r100	23S ribosomal RNA
1904082	-	rRNA		LMOSA_r100	23S ribosomal RNA
1904093	-	rRNA		LMOSA_r100	23S ribosomal RNA
1904104	-	rRNA		LMOSA_r100	23S ribosomal RNA
1904115	-	rRNA		LMOSA_r100	23S ribosomal RNA
1904128	-	rRNA		LMOSA_r100	23S ribosomal RNA
1904137	-	rRNA		LMOSA_r100	23S ribosomal RNA
1904153	-	rRNA		LMOSA_r100	23S ribosomal RNA
1904161	-	rRNA		LMOSA_r100	23S ribosomal RNA
1904172	-	rRNA		LMOSA_r100	23S ribosomal RNA
1904189	-	rRNA		LMOSA_r100	23S ribosomal RNA
1904230	-	rRNA		LMOSA_r100	23S ribosomal RNA
1904264	-	rRNA		LMOSA_r100	23S ribosomal RNA
1904301	-	rRNA		LMOSA_r100	23S ribosomal RNA
1904337	-	rRNA		LMOSA_r100	23S ribosomal RNA
1904345	-	rRNA		LMOSA_r100	23S ribosomal RNA
1904366	-	rRNA		LMOSA_r100	23S ribosomal RNA
1904400	-	rRNA		LMOSA_r100	23S ribosomal RNA
1904432	-	rRNA		LMOSA_r100	23S ribosomal RNA
1904446	-	rRNA		LMOSA_r100	23S ribosomal RNA
1904454	-	rRNA		LMOSA_r100	23S ribosomal RNA
1904488	-	rRNA		LMOSA_r100	23S ribosomal RNA
1904499	-	rRNA		LMOSA_r100	23S ribosomal RNA
1904508	-	rRNA		LMOSA_r100	23S ribosomal RNA
1904526	-	rRNA		LMOSA_r100	23S ribosomal RNA
1904562	-	rRNA		LMOSA_r100	23S ribosomal RNA
1904664	-	rRNA		LMOSA_r100	23S ribosomal RNA
1904695	-	rRNA		LMOSA_r100	23S ribosomal RNA
1904713	-	rRNA		LMOSA_r100	23S ribosomal RNA
1904728	-	rRNA		LMOSA_r100	23S ribosomal RNA
1904766	-	rRNA		LMOSA_r100	23S ribosomal RNA
1904779	-	rRNA		LMOSA_r100	23S ribosomal RNA
1904823	-	rRNA		LMOSA_r100	23S ribosomal RNA
1904851	-	rRNA		LMOSA_r100	23S ribosomal RNA
1904880	-	rRNA		LMOSA_r100	23S ribosomal RNA
1904901	-	rRNA		LMOSA_r100	23S ribosomal RNA
1904956	-	rRNA		LMOSA_r100	23S ribosomal RNA
1904967	-	rRNA		LMOSA_r100	23S ribosomal RNA
1904984	-	rRNA		LMOSA_r100	23S ribosomal RNA
1905017	-	rRNA		LMOSA_r100	23S ribosomal RNA
1905027	-	rRNA		LMOSA_r100	23S ribosomal RNA
1905040	-	rRNA		LMOSA_r100	23S ribosomal RNA
1905077	-	rRNA		LMOSA_r100	23S ribosomal RNA
1905106	-	rRNA		LMOSA_r100	23S ribosomal RNA
1905169	-	rRNA		LMOSA_r100	23S ribosomal RNA
1905201	-	rRNA		LMOSA_r100	23S ribosomal RNA
1905274	-	rRNA		LMOSA_r100	23S ribosomal RNA
1905284	-	rRNA		LMOSA_r100	23S ribosomal RNA
1905295	-	rRNA		LMOSA_r100	23S ribosomal RNA
1905303	-	rRNA		LMOSA_r100	23S ribosomal RNA
1905333	-	rRNA		LMOSA_r100	23S ribosomal RNA
1905348	-	rRNA		LMOSA_r100	23S ribosomal RNA
1905375	-	rRNA		LMOSA_r100	23S ribosomal RNA
1905396	-	rRNA		LMOSA_r100	23S ribosomal RNA
1905405	-	rRNA		LMOSA_r100	23S ribosomal RNA
1905433	-	rRNA		LMOSA_r100	23S ribosomal RNA
1905455	-	rRNA		LMOSA_r100	23S ribosomal RNA
1905482	-	rRNA		LMOSA_r100	23S ribosomal RNA
1905500	-	rRNA		LMOSA_r100	23S ribosomal RNA
1905519	-	rRNA		LMOSA_r100	23S ribosomal RNA
1905537	-	rRNA		LMOSA_r100	23S ribosomal RNA
1905545	-	rRNA		LMOSA_r100	23S ribosomal RNA
1905559	-	rRNA		LMOSA_r100	23S ribosomal RNA
1905643	-	rRNA		LMOSA_r100	23S ribosomal RNA
1905654	-	rRNA		LMOSA_r100	23S ribosomal RNA
1905679	-	rRNA		LMOSA_r100	23S ribosomal RNA
1905687	-	rRNA		LMOSA_r100	23S ribosomal RNA
1905700	-	rRNA		LMOSA_r100	23S ribosomal RNA
1905710	-	rRNA		LMOSA_r100	23S ribosomal RNA
1905744	-	rRNA		LMOSA_r100	23S ribosomal RNA
1905759	-	rRNA		LMOSA_r100	23S ribosomal RNA
1905795	-	rRNA		LMOSA_r100	23S ribosomal RNA
1905833	-	rRNA		LMOSA_r100	23S ribosomal RNA
1905855	-	rRNA		LMOSA_r100	23S ribosomal RNA
1905864	-	rRNA		LMOSA_r100	23S ribosomal RNA
1905925	-	rRNA		LMOSA_r100	23S ribosomal RNA
1905935	-	rRNA		LMOSA_r100	23S ribosomal RNA
1905962	-	rRNA		LMOSA_r100	23S ribosomal RNA
1905982	-	rRNA		LMOSA_r100	23S ribosomal RNA
1906017	-	rRNA		LMOSA_r100	23S ribosomal RNA
1906056	-	rRNA		LMOSA_r100	23S ribosomal RNA
1906085	-	rRNA		LMOSA_r100	23S ribosomal RNA
1906162	-	rRNA		LMOSA_r100	23S ribosomal RNA
1906177	-	rRNA		LMOSA_r100	23S ribosomal RNA
1906220	-	rRNA		LMOSA_r100	23S ribosomal RNA
1906237	-	rRNA		LMOSA_r100	23S ribosomal RNA
1906268	-	rRNA		LMOSA_r100	23S ribosomal RNA
1906326	-	rRNA		LMOSA_r100	23S ribosomal RNA
1906352	-	rRNA		LMOSA_r100	23S ribosomal RNA
1906390	-	rRNA		LMOSA_r100	23S ribosomal RNA
1906441	-	rRNA		LMOSA_r100	23S ribosomal RNA
1906517	-	rRNA		LMOSA_r100	23S ribosomal RNA
1906531	-	rRNA		LMOSA_r100	23S ribosomal RNA
1906582	-	rRNA		LMOSA_r100	23S ribosomal RNA
1906597	-	rRNA		LMOSA_r100	23S ribosomal RNA
1906638	-	rRNA		LMOSA_r100	23S ribosomal RNA
1906672	-	rRNA		LMOSA_r100	23S ribosomal RNA
1906688	-	rRNA		LMOSA_r100	23S ribosomal RNA
1906709	-	rRNA		LMOSA_r100	23S ribosomal RNA
1906763	-	rRNA		LMOSA_r100	23S ribosomal RNA
1906781	-	rRNA		LMOSA_r100	23S ribosomal RNA
1906795	-	rRNA		LMOSA_r100	23S ribosomal RNA
1906827	-	rRNA		LMOSA_r100	23S ribosomal RNA
1906886	-	rRNA		LMOSA_r100	23S ribosomal RNA
1906898	-	rRNA		LMOSA_r100	23S ribosomal RNA
1906941	-	rRNA		LMOSA_r100	23S ribosomal RNA
1907195	-	intergenic region
1907208	-	intergenic region
1907227	-	rRNA		LMOSA_r160	16S ribosomal RNA
1907241	-	rRNA		LMOSA_r160	16S ribosomal RNA
1907261	-	rRNA		LMOSA_r160	16S ribosomal RNA
1907325	-	rRNA		LMOSA_r160	16S ribosomal RNA
1907349	-	rRNA		LMOSA_r160	16S ribosomal RNA
1907396	-	rRNA		LMOSA_r160	16S ribosomal RNA
1907428	-	rRNA		LMOSA_r160	16S ribosomal RNA
1907464	-	rRNA		LMOSA_r160	16S ribosomal RNA
1907483	-	rRNA		LMOSA_r160	16S ribosomal RNA
1907519	-	rRNA		LMOSA_r160	16S ribosomal RNA
1907570	-	rRNA		LMOSA_r160	16S ribosomal RNA
1907632	-	rRNA		LMOSA_r160	16S ribosomal RNA
1907643	-	rRNA		LMOSA_r160	16S ribosomal RNA
1907673	-	rRNA		LMOSA_r160	16S ribosomal RNA
1907709	-	rRNA		LMOSA_r160	16S ribosomal RNA
1907718	-	rRNA		LMOSA_r160	16S ribosomal RNA
1907739	-	rRNA		LMOSA_r160	16S ribosomal RNA
1907793	-	rRNA		LMOSA_r160	16S ribosomal RNA
1907812	-	rRNA		LMOSA_r160	16S ribosomal RNA
1907874	-	rRNA		LMOSA_r160	16S ribosomal RNA
1907890	-	rRNA		LMOSA_r160	16S ribosomal RNA
1907898	-	rRNA		LMOSA_r160	16S ribosomal RNA
1907926	-	rRNA		LMOSA_r160	16S ribosomal RNA
1907957	-	rRNA		LMOSA_r160	16S ribosomal RNA
1907967	-	rRNA		LMOSA_r160	16S ribosomal RNA
1907981	-	rRNA		LMOSA_r160	16S ribosomal RNA
1908055	-	rRNA		LMOSA_r160	16S ribosomal RNA
1908064	-	rRNA		LMOSA_r160	16S ribosomal RNA
1908096	-	rRNA		LMOSA_r160	16S ribosomal RNA
1908131	-	rRNA		LMOSA_r160	16S ribosomal RNA
1908142	-	rRNA		LMOSA_r160	16S ribosomal RNA
1908150	-	rRNA		LMOSA_r160	16S ribosomal RNA
1908160	-	rRNA		LMOSA_r160	16S ribosomal RNA
1908232	-	rRNA		LMOSA_r160	16S ribosomal RNA
1908240	-	rRNA		LMOSA_r160	16S ribosomal RNA
1908294	-	rRNA		LMOSA_r160	16S ribosomal RNA
1908312	-	rRNA		LMOSA_r160	16S ribosomal RNA
1908327	-	rRNA		LMOSA_r160	16S ribosomal RNA
1908345	-	rRNA		LMOSA_r160	16S ribosomal RNA
1908378	-	rRNA		LMOSA_r160	16S ribosomal RNA
1908410	-	rRNA		LMOSA_r160	16S ribosomal RNA
1908421	-	rRNA		LMOSA_r160	16S ribosomal RNA
1908452	-	rRNA		LMOSA_r160	16S ribosomal RNA
1908496	-	rRNA		LMOSA_r160	16S ribosomal RNA
1908529	-	rRNA		LMOSA_r160	16S ribosomal RNA
1908552	-	rRNA		LMOSA_r160	16S ribosomal RNA
1908573	-	rRNA		LMOSA_r160	16S ribosomal RNA
1908585	-	rRNA		LMOSA_r160	16S ribosomal RNA
1908594	-	rRNA		LMOSA_r160	16S ribosomal RNA
1908617	-	rRNA		LMOSA_r160	16S ribosomal RNA
1908625	-	rRNA		LMOSA_r160	16S ribosomal RNA
1908650	-	rRNA		LMOSA_r160	16S ribosomal RNA
1908658	-	rRNA		LMOSA_r160	16S ribosomal RNA
1908672	-	rRNA		LMOSA_r160	16S ribosomal RNA
1908790	-	intergenic region
1908815	-	intergenic region
1919309	-	CDS	EGJ25327.1	LMOSA_27140	hypothetical protein
1919337	-	CDS	EGJ25327.1	LMOSA_27140	hypothetical protein
1919386	-	CDS	EGJ25327.1	LMOSA_27140	hypothetical protein
1919484	-	CDS	EGJ25327.1	LMOSA_27140	hypothetical protein
1919508	-	CDS	EGJ25327.1	LMOSA_27140	hypothetical protein
1919602	-	CDS	EGJ25327.1	LMOSA_27140	hypothetical protein
1919757	-	CDS	EGJ25328.1	LMOSA_27150	tRNA (guanine-N(1)-)-methyltransferase
1919809	-	CDS	EGJ25328.1	LMOSA_27150	tRNA (guanine-N(1)-)-methyltransferase
1919822	-	CDS	EGJ25328.1	LMOSA_27150	tRNA (guanine-N(1)-)-methyltransferase
1919847	-	CDS	EGJ25328.1	LMOSA_27150	tRNA (guanine-N(1)-)-methyltransferase
1920032	-	CDS	EGJ25328.1	LMOSA_27150	tRNA (guanine-N(1)-)-methyltransferase
1920107	-	CDS	EGJ25328.1	LMOSA_27150	tRNA (guanine-N(1)-)-methyltransferase
1920152	-	CDS	EGJ25328.1	LMOSA_27150	tRNA (guanine-N(1)-)-methyltransferase
1920249	-	CDS	EGJ25328.1	LMOSA_27150	tRNA (guanine-N(1)-)-methyltransferase
1920273	-	CDS	EGJ25328.1	LMOSA_27150	tRNA (guanine-N(1)-)-methyltransferase
2018061	-	intergenic region
2018078	-	intergenic region
2018108	-	intergenic region
2018139	-	intergenic region
2018148	-	intergenic region
2018162	-	intergenic region
2018174	-	intergenic region
2018247	-	intergenic region
2018307	-	intergenic region
2018392	-	intergenic region
2018425	-	intergenic region
2072448	-	CDS	EGJ25476.1	LMOSA_28630	LysM domain protein
2072479	-	CDS	EGJ25476.1	LMOSA_28630	LysM domain protein
2072537	-	CDS	EGJ25476.1	LMOSA_28630	LysM domain protein
2072579	-	CDS	EGJ25476.1	LMOSA_28630	LysM domain protein
2072651	-	CDS	EGJ25476.1	LMOSA_28630	LysM domain protein
2072823	-	intergenic region
2102681	+	intergenic region
2102693	+	intergenic region
2102932	+	CDS	EGJ25502.1	LMOSA_28890	XpaC protein
2102970	+	CDS	EGJ25502.1	LMOSA_28890	XpaC protein
2103055	+	CDS	EGJ25502.1	LMOSA_28890	XpaC protein
2103194	+	CDS	EGJ25502.1	LMOSA_28890	XpaC protein
2103344	+	CDS	EGJ25503.1	LMOSA_28900	hypothetical protein
2103398	+	CDS	EGJ25503.1	LMOSA_28900	hypothetical protein
2103423	+	CDS	EGJ25503.1	LMOSA_28900	hypothetical protein
2103492	+	CDS	EGJ25503.1	LMOSA_28900	hypothetical protein
2103600	+	CDS	EGJ25503.1	LMOSA_28900	hypothetical protein
2103666	+	CDS	EGJ25503.1	LMOSA_28900	hypothetical protein
2103777	+	CDS	EGJ25503.1	LMOSA_28900	hypothetical protein
2157416	-	CDS	EGJ25548.1	LMOSA_29350	Cell division protein DIVIVA
2223616	-	CDS	EGJ25616.1	LMOSA_590	Redox-sensing transcriptional repressor rex
2223681	-	CDS	EGJ25616.1	LMOSA_590	Redox-sensing transcriptional repressor rex
2223694	-	CDS	EGJ25616.1	LMOSA_590	Redox-sensing transcriptional repressor rex
2223738	-	CDS	EGJ25616.1	LMOSA_590	Redox-sensing transcriptional repressor rex
2223779	-	CDS	EGJ25616.1	LMOSA_590	Redox-sensing transcriptional repressor rex
2223793	-	CDS	EGJ25616.1	LMOSA_590	Redox-sensing transcriptional repressor rex
2223808	-	CDS	EGJ25616.1	LMOSA_590	Redox-sensing transcriptional repressor rex
2223875	-	CDS	EGJ25616.1	LMOSA_590	Redox-sensing transcriptional repressor rex
2223897	-	CDS	EGJ25616.1	LMOSA_590	Redox-sensing transcriptional repressor rex
2223935	-	CDS	EGJ25616.1	LMOSA_590	Redox-sensing transcriptional repressor rex
2223974	-	CDS	EGJ25616.1	LMOSA_590	Redox-sensing transcriptional repressor rex
2224097	-	CDS	EGJ25616.1	LMOSA_590	Redox-sensing transcriptional repressor rex
2224158	-	CDS	EGJ25616.1	LMOSA_590	Redox-sensing transcriptional repressor rex
2224172	-	CDS	EGJ25616.1	LMOSA_590	Redox-sensing transcriptional repressor rex
2224181	-	CDS	EGJ25616.1	LMOSA_590	Redox-sensing transcriptional repressor rex
2224220	-	CDS	EGJ25616.1	LMOSA_590	Redox-sensing transcriptional repressor rex
2224258	-	intergenic region
2224311	-	intergenic region
2300345	+	intergenic region
2300392	+	intergenic region
2300411	+	intergenic region
2300437	+	intergenic region
2300497	+	intergenic region
2300566	+	intergenic region
2300640	+	intergenic region
2300651	+	intergenic region
2300749	+	intergenic region
2300757	+	intergenic region
2300769	+	intergenic region
2300777	+	intergenic region
2300793	+	intergenic region
2313930	+	intergenic region
2313941	+	CDS	EGJ25702.1	LMOSA_1450	hypothetical protein
2313958	+	CDS	EGJ25702.1	LMOSA_1450	hypothetical protein
2314124	+	CDS	EGJ25702.1	LMOSA_1450	hypothetical protein
2314192	+	CDS	EGJ25702.1	LMOSA_1450	hypothetical protein
2316407	-	CDS	EGJ25704.1	LMOSA_1470	hypothetical protein
2316433	-	CDS	EGJ25704.1	LMOSA_1470	hypothetical protein
2316442	-	CDS	EGJ25704.1	LMOSA_1470	hypothetical protein
2316460	-	CDS	EGJ25704.1	LMOSA_1470	hypothetical protein
2316489	-	CDS	EGJ25704.1	LMOSA_1470	hypothetical protein
2316511	-	CDS	EGJ25704.1	LMOSA_1470	hypothetical protein
2316522	-	CDS	EGJ25704.1	LMOSA_1470	hypothetical protein
2316532	-	CDS	EGJ25704.1	LMOSA_1470	hypothetical protein
2316542	-	CDS	EGJ25704.1	LMOSA_1470	hypothetical protein
2316551	-	CDS	EGJ25704.1	LMOSA_1470	hypothetical protein
2316567	-	intergenic region
2358937	-	intergenic region
2358983	-	CDS	EGJ25738.1	LMOSA_1810	Regulatory protein spx
2358993	-	CDS	EGJ25738.1	LMOSA_1810	Regulatory protein spx
2359023	-	CDS	EGJ25738.1	LMOSA_1810	Regulatory protein spx
2359053	-	CDS	EGJ25738.1	LMOSA_1810	Regulatory protein spx
2359069	-	CDS	EGJ25738.1	LMOSA_1810	Regulatory protein spx
2359100	-	CDS	EGJ25738.1	LMOSA_1810	Regulatory protein spx
2359130	-	CDS	EGJ25738.1	LMOSA_1810	Regulatory protein spx
2359224	-	CDS	EGJ25738.1	LMOSA_1810	Regulatory protein spx
2359240	-	CDS	EGJ25738.1	LMOSA_1810	Regulatory protein spx
2359271	-	CDS	EGJ25738.1	LMOSA_1810	Regulatory protein spx
2359282	-	CDS	EGJ25738.1	LMOSA_1810	Regulatory protein spx
2359318	-	CDS	EGJ25738.1	LMOSA_1810	Regulatory protein spx
2359362	-	intergenic region
2359435	-	intergenic region
2359490	-	intergenic region
2377091	-	CDS	EGJ25754.1	LMOSA_1960	Putative membrane protein
2377130	-	CDS	EGJ25754.1	LMOSA_1960	Putative membrane protein
2377163	-	CDS	EGJ25754.1	LMOSA_1960	Putative membrane protein
2377228	-	CDS	EGJ25754.1	LMOSA_1960	Putative membrane protein
2377270	-	CDS	EGJ25754.1	LMOSA_1960	Putative membrane protein
2377375	-	CDS	EGJ25754.1	LMOSA_1960	Putative membrane protein
2379533	-	CDS	EGJ25757.1	LMOSA_1990	hypothetical protein
2386290	+	CDS	EGJ25766.1	LMOSA_2080	Foldase protein prsA 1
2386342	+	CDS	EGJ25766.1	LMOSA_2080	Foldase protein prsA 1
2386354	+	CDS	EGJ25766.1	LMOSA_2080	Foldase protein prsA 1
2386366	+	CDS	EGJ25766.1	LMOSA_2080	Foldase protein prsA 1
2386470	+	CDS	EGJ25766.1	LMOSA_2080	Foldase protein prsA 1
2386478	+	CDS	EGJ25766.1	LMOSA_2080	Foldase protein prsA 1
2386560	+	CDS	EGJ25766.1	LMOSA_2080	Foldase protein prsA 1
2386573	+	CDS	EGJ25766.1	LMOSA_2080	Foldase protein prsA 1
2386591	+	CDS	EGJ25766.1	LMOSA_2080	Foldase protein prsA 1
2386693	+	CDS	EGJ25766.1	LMOSA_2080	Foldase protein prsA 1
2386711	+	CDS	EGJ25766.1	LMOSA_2080	Foldase protein prsA 1
2386734	+	CDS	EGJ25766.1	LMOSA_2080	Foldase protein prsA 1
2386843	+	CDS	EGJ25766.1	LMOSA_2080	Foldase protein prsA 1
2435533	+	intergenic region
2435642	+	CDS	EGJ25813.1	LMOSA_2540	Arsenate reductase
2435654	+	CDS	EGJ25813.1	LMOSA_2540	Arsenate reductase
2435772	+	CDS	EGJ25813.1	LMOSA_2540	Arsenate reductase
2435815	+	CDS	EGJ25813.1	LMOSA_2540	Arsenate reductase
2435840	+	CDS	EGJ25813.1	LMOSA_2540	Arsenate reductase
2435872	+	CDS	EGJ25813.1	LMOSA_2540	Arsenate reductase
2435910	+	CDS	EGJ25813.1	LMOSA_2540	Arsenate reductase
2436019	+	CDS	EGJ25813.1	LMOSA_2540	Arsenate reductase
2436032	+	intergenic region
2448619	-	CDS	EGJ25825.1	LMOSA_2660	O6-methylguanine DNA methyltransferase
2448664	-	CDS	EGJ25825.1	LMOSA_2660	O6-methylguanine DNA methyltransferase
2448764	-	CDS	EGJ25825.1	LMOSA_2660	O6-methylguanine DNA methyltransferase
2448998	-	CDS	EGJ25825.1	LMOSA_2660	O6-methylguanine DNA methyltransferase
2461392	-	intergenic region
2461499	-	CDS	EGJ25840.1	MOSA_2801
2505076	+	intergenic region
2505105	+	CDS	EGJ25882.1	LMOSA_3210	Glutamate/gamma-aminobutyrate antiporter
2505119	+	CDS	EGJ25882.1	LMOSA_3210	Glutamate/gamma-aminobutyrate antiporter
2505138	+	CDS	EGJ25882.1	LMOSA_3210	Glutamate/gamma-aminobutyrate antiporter
2505167	+	CDS	EGJ25882.1	LMOSA_3210	Glutamate/gamma-aminobutyrate antiporter
2505275	+	CDS	EGJ25882.1	LMOSA_3210	Glutamate/gamma-aminobutyrate antiporter
2505375	+	CDS	EGJ25882.1	LMOSA_3210	Glutamate/gamma-aminobutyrate antiporter
2505390	+	CDS	EGJ25882.1	LMOSA_3210	Glutamate/gamma-aminobutyrate antiporter
2505594	+	CDS	EGJ25882.1	LMOSA_3210	Glutamate/gamma-aminobutyrate antiporter
2505750	+	CDS	EGJ25882.1	LMOSA_3210	Glutamate/gamma-aminobutyrate antiporter
2505934	+	CDS	EGJ25882.1	LMOSA_3210	Glutamate/gamma-aminobutyrate antiporter
2505973	+	CDS	EGJ25882.1	LMOSA_3210	Glutamate/gamma-aminobutyrate antiporter
2505985	+	CDS	EGJ25882.1	LMOSA_3210	Glutamate/gamma-aminobutyrate antiporter
2506031	+	CDS	EGJ25882.1	LMOSA_3210	Glutamate/gamma-aminobutyrate antiporter
2506218	+	CDS	EGJ25882.1	LMOSA_3210	Glutamate/gamma-aminobutyrate antiporter
2506275	+	CDS	EGJ25882.1	LMOSA_3210	Glutamate/gamma-aminobutyrate antiporter
2506309	+	CDS	EGJ25882.1	LMOSA_3210	Glutamate/gamma-aminobutyrate antiporter
2506333	+	CDS	EGJ25882.1	LMOSA_3210	Glutamate/gamma-aminobutyrate antiporter
2506403	+	CDS	EGJ25882.1	LMOSA_3210	Glutamate/gamma-aminobutyrate antiporter
2506425	+	CDS	EGJ25882.1	LMOSA_3210	Glutamate/gamma-aminobutyrate antiporter
2506467	+	CDS	EGJ25882.1	LMOSA_3210	Glutamate/gamma-aminobutyrate antiporter
2506635	+	CDS	EGJ25883.1	LMOSA_3220	Glutamate decarboxylase
2506666	+	CDS	EGJ25883.1	LMOSA_3220	Glutamate decarboxylase
2506681	+	CDS	EGJ25883.1	LMOSA_3220	Glutamate decarboxylase
2506696	+	CDS	EGJ25883.1	LMOSA_3220	Glutamate decarboxylase
2506704	+	CDS	EGJ25883.1	LMOSA_3220	Glutamate decarboxylase
2506736	+	CDS	EGJ25883.1	LMOSA_3220	Glutamate decarboxylase
2506755	+	CDS	EGJ25883.1	LMOSA_3220	Glutamate decarboxylase
2506774	+	CDS	EGJ25883.1	LMOSA_3220	Glutamate decarboxylase
2506829	+	CDS	EGJ25883.1	LMOSA_3220	Glutamate decarboxylase
2507061	+	CDS	EGJ25883.1	LMOSA_3220	Glutamate decarboxylase
2507124	+	CDS	EGJ25883.1	LMOSA_3220	Glutamate decarboxylase
2507148	+	CDS	EGJ25883.1	LMOSA_3220	Glutamate decarboxylase
2507170	+	CDS	EGJ25883.1	LMOSA_3220	Glutamate decarboxylase
2507262	+	CDS	EGJ25883.1	LMOSA_3220	Glutamate decarboxylase
2507274	+	CDS	EGJ25883.1	LMOSA_3220	Glutamate decarboxylase
2507284	+	CDS	EGJ25883.1	LMOSA_3220	Glutamate decarboxylase
2507322	+	CDS	EGJ25883.1	LMOSA_3220	Glutamate decarboxylase
2507454	+	CDS	EGJ25883.1	LMOSA_3220	Glutamate decarboxylase
2507494	+	CDS	EGJ25883.1	LMOSA_3220	Glutamate decarboxylase
2507529	+	CDS	EGJ25883.1	LMOSA_3220	Glutamate decarboxylase
2507546	+	CDS	EGJ25883.1	LMOSA_3220	Glutamate decarboxylase
2507664	+	CDS	EGJ25883.1	LMOSA_3220	Glutamate decarboxylase
2507674	+	CDS	EGJ25883.1	LMOSA_3220	Glutamate decarboxylase
2507725	+	CDS	EGJ25883.1	LMOSA_3220	Glutamate decarboxylase
2507891	+	CDS	EGJ25883.1	LMOSA_3220	Glutamate decarboxylase
2507928	+	CDS	EGJ25883.1	LMOSA_3220	Glutamate decarboxylase
2508042	+	intergenic region
2511268	-	rRNA		LMOSA_r101	5S ribosomal RNA
2511276	-	rRNA		LMOSA_r101	5S ribosomal RNA
2511445	-	rRNA		LMOSA_r70	23S ribosomal RNA
2511463	-	rRNA		LMOSA_r70	23S ribosomal RNA
2511475	-	rRNA		LMOSA_r70	23S ribosomal RNA
2511486	-	rRNA		LMOSA_r70	23S ribosomal RNA
2511497	-	rRNA		LMOSA_r70	23S ribosomal RNA
2511508	-	rRNA		LMOSA_r70	23S ribosomal RNA
2511521	-	rRNA		LMOSA_r70	23S ribosomal RNA
2511530	-	rRNA		LMOSA_r70	23S ribosomal RNA
2511546	-	rRNA		LMOSA_r70	23S ribosomal RNA
2511554	-	rRNA		LMOSA_r70	23S ribosomal RNA
2511565	-	rRNA		LMOSA_r70	23S ribosomal RNA
2511582	-	rRNA		LMOSA_r70	23S ribosomal RNA
2511623	-	rRNA		LMOSA_r70	23S ribosomal RNA
2511657	-	rRNA		LMOSA_r70	23S ribosomal RNA
2511694	-	rRNA		LMOSA_r70	23S ribosomal RNA
2511730	-	rRNA		LMOSA_r70	23S ribosomal RNA
2511738	-	rRNA		LMOSA_r70	23S ribosomal RNA
2511759	-	rRNA		LMOSA_r70	23S ribosomal RNA
2511793	-	rRNA		LMOSA_r70	23S ribosomal RNA
2511825	-	rRNA		LMOSA_r70	23S ribosomal RNA
2511839	-	rRNA		LMOSA_r70	23S ribosomal RNA
2511847	-	rRNA		LMOSA_r70	23S ribosomal RNA
2511881	-	rRNA		LMOSA_r70	23S ribosomal RNA
2511892	-	rRNA		LMOSA_r70	23S ribosomal RNA
2511901	-	rRNA		LMOSA_r70	23S ribosomal RNA
2511919	-	rRNA		LMOSA_r70	23S ribosomal RNA
2511955	-	rRNA		LMOSA_r70	23S ribosomal RNA
2512057	-	rRNA		LMOSA_r70	23S ribosomal RNA
2512088	-	rRNA		LMOSA_r70	23S ribosomal RNA
2512106	-	rRNA		LMOSA_r70	23S ribosomal RNA
2512121	-	rRNA		LMOSA_r70	23S ribosomal RNA
2512159	-	rRNA		LMOSA_r70	23S ribosomal RNA
2512172	-	rRNA		LMOSA_r70	23S ribosomal RNA
2512216	-	rRNA		LMOSA_r70	23S ribosomal RNA
2512244	-	rRNA		LMOSA_r70	23S ribosomal RNA
2512273	-	rRNA		LMOSA_r70	23S ribosomal RNA
2512294	-	rRNA		LMOSA_r70	23S ribosomal RNA
2512349	-	rRNA		LMOSA_r70	23S ribosomal RNA
2512360	-	rRNA		LMOSA_r70	23S ribosomal RNA
2512410	-	rRNA		LMOSA_r70	23S ribosomal RNA
2512420	-	rRNA		LMOSA_r70	23S ribosomal RNA
2512433	-	rRNA		LMOSA_r70	23S ribosomal RNA
2512470	-	rRNA		LMOSA_r70	23S ribosomal RNA
2512499	-	rRNA		LMOSA_r70	23S ribosomal RNA
2512562	-	rRNA		LMOSA_r70	23S ribosomal RNA
2512594	-	rRNA		LMOSA_r70	23S ribosomal RNA
2512667	-	rRNA		LMOSA_r70	23S ribosomal RNA
2512677	-	rRNA		LMOSA_r70	23S ribosomal RNA
2512689	-	rRNA		LMOSA_r70	23S ribosomal RNA
2512726	-	rRNA		LMOSA_r70	23S ribosomal RNA
2512741	-	rRNA		LMOSA_r70	23S ribosomal RNA
2512768	-	rRNA		LMOSA_r70	23S ribosomal RNA
2512789	-	rRNA		LMOSA_r70	23S ribosomal RNA
2512798	-	rRNA		LMOSA_r70	23S ribosomal RNA
2512826	-	rRNA		LMOSA_r70	23S ribosomal RNA
2512848	-	rRNA		LMOSA_r70	23S ribosomal RNA
2512875	-	rRNA		LMOSA_r70	23S ribosomal RNA
2512893	-	rRNA		LMOSA_r70	23S ribosomal RNA
2512912	-	rRNA		LMOSA_r70	23S ribosomal RNA
2512930	-	rRNA		LMOSA_r70	23S ribosomal RNA
2512939	-	rRNA		LMOSA_r70	23S ribosomal RNA
2512952	-	rRNA		LMOSA_r70	23S ribosomal RNA
2513034	-	rRNA		LMOSA_r70	23S ribosomal RNA
2513047	-	rRNA		LMOSA_r70	23S ribosomal RNA
2513072	-	rRNA		LMOSA_r70	23S ribosomal RNA
2513080	-	rRNA		LMOSA_r70	23S ribosomal RNA
2513094	-	rRNA		LMOSA_r70	23S ribosomal RNA
2513140	-	rRNA		LMOSA_r70	23S ribosomal RNA
2513152	-	rRNA		LMOSA_r70	23S ribosomal RNA
2513188	-	rRNA		LMOSA_r70	23S ribosomal RNA
2513248	-	rRNA		LMOSA_r70	23S ribosomal RNA
2513257	-	rRNA		LMOSA_r70	23S ribosomal RNA
2513318	-	rRNA		LMOSA_r70	23S ribosomal RNA
2513328	-	rRNA		LMOSA_r70	23S ribosomal RNA
2513355	-	rRNA		LMOSA_r70	23S ribosomal RNA
2513375	-	rRNA		LMOSA_r70	23S ribosomal RNA
2513410	-	rRNA		LMOSA_r70	23S ribosomal RNA
2513449	-	rRNA		LMOSA_r70	23S ribosomal RNA
2513478	-	rRNA		LMOSA_r70	23S ribosomal RNA
2513555	-	rRNA		LMOSA_r70	23S ribosomal RNA
2513570	-	rRNA		LMOSA_r70	23S ribosomal RNA
2513612	-	rRNA		LMOSA_r70	23S ribosomal RNA
2513630	-	rRNA		LMOSA_r70	23S ribosomal RNA
2513661	-	rRNA		LMOSA_r70	23S ribosomal RNA
2513688	-	rRNA		LMOSA_r70	23S ribosomal RNA
2513744	-	rRNA		LMOSA_r70	23S ribosomal RNA
2513784	-	rRNA		LMOSA_r70	23S ribosomal RNA
2513835	-	rRNA		LMOSA_r70	23S ribosomal RNA
2513911	-	rRNA		LMOSA_r70	23S ribosomal RNA
2513926	-	rRNA		LMOSA_r70	23S ribosomal RNA
2513976	-	rRNA		LMOSA_r70	23S ribosomal RNA
2513992	-	rRNA		LMOSA_r70	23S ribosomal RNA
2514032	-	rRNA		LMOSA_r70	23S ribosomal RNA
2514066	-	rRNA		LMOSA_r70	23S ribosomal RNA
2514082	-	rRNA		LMOSA_r70	23S ribosomal RNA
2514103	-	rRNA		LMOSA_r70	23S ribosomal RNA
2514157	-	rRNA		LMOSA_r70	23S ribosomal RNA
2514176	-	rRNA		LMOSA_r70	23S ribosomal RNA
2514188	-	rRNA		LMOSA_r70	23S ribosomal RNA
2514222	-	rRNA		LMOSA_r70	23S ribosomal RNA
2514280	-	rRNA		LMOSA_r70	23S ribosomal RNA
2514293	-	rRNA		LMOSA_r70	23S ribosomal RNA
2514337	-	rRNA		LMOSA_r70	23S ribosomal RNA
2514872	-	rRNA		LMOSA_r130	16S ribosomal RNA
2514886	-	rRNA		LMOSA_r130	16S ribosomal RNA
2514905	-	rRNA		LMOSA_r130	16S ribosomal RNA
2514970	-	rRNA		LMOSA_r130	16S ribosomal RNA
2514994	-	rRNA		LMOSA_r130	16S ribosomal RNA
2515041	-	rRNA		LMOSA_r130	16S ribosomal RNA
2515073	-	rRNA		LMOSA_r130	16S ribosomal RNA
2515109	-	rRNA		LMOSA_r130	16S ribosomal RNA
2515128	-	rRNA		LMOSA_r130	16S ribosomal RNA
2515164	-	rRNA		LMOSA_r130	16S ribosomal RNA
2515215	-	rRNA		LMOSA_r130	16S ribosomal RNA
2515226	-	rRNA		LMOSA_r130	16S ribosomal RNA
2515277	-	rRNA		LMOSA_r130	16S ribosomal RNA
2515288	-	rRNA		LMOSA_r130	16S ribosomal RNA
2515318	-	rRNA		LMOSA_r130	16S ribosomal RNA
2515341	-	rRNA		LMOSA_r130	16S ribosomal RNA
2515354	-	rRNA		LMOSA_r130	16S ribosomal RNA
2515363	-	rRNA		LMOSA_r130	16S ribosomal RNA
2515384	-	rRNA		LMOSA_r130	16S ribosomal RNA
2515438	-	rRNA		LMOSA_r130	16S ribosomal RNA
2515457	-	rRNA		LMOSA_r130	16S ribosomal RNA
2515519	-	rRNA		LMOSA_r130	16S ribosomal RNA
2515535	-	rRNA		LMOSA_r130	16S ribosomal RNA
2515543	-	rRNA		LMOSA_r130	16S ribosomal RNA
2515571	-	rRNA		LMOSA_r130	16S ribosomal RNA
2515602	-	rRNA		LMOSA_r130	16S ribosomal RNA
2515612	-	rRNA		LMOSA_r130	16S ribosomal RNA
2515626	-	rRNA		LMOSA_r130	16S ribosomal RNA
2515700	-	rRNA		LMOSA_r130	16S ribosomal RNA
2515709	-	rRNA		LMOSA_r130	16S ribosomal RNA
2515741	-	rRNA		LMOSA_r130	16S ribosomal RNA
2515776	-	rRNA		LMOSA_r130	16S ribosomal RNA
2515787	-	rRNA		LMOSA_r130	16S ribosomal RNA
2515795	-	rRNA		LMOSA_r130	16S ribosomal RNA
2515805	-	rRNA		LMOSA_r130	16S ribosomal RNA
2515874	-	rRNA		LMOSA_r130	16S ribosomal RNA
2515884	-	rRNA		LMOSA_r130	16S ribosomal RNA
2515939	-	rRNA		LMOSA_r130	16S ribosomal RNA
2515957	-	rRNA		LMOSA_r130	16S ribosomal RNA
2515972	-	rRNA		LMOSA_r130	16S ribosomal RNA
2515989	-	rRNA		LMOSA_r130	16S ribosomal RNA
2516022	-	rRNA		LMOSA_r130	16S ribosomal RNA
2516055	-	rRNA		LMOSA_r130	16S ribosomal RNA
2516066	-	rRNA		LMOSA_r130	16S ribosomal RNA
2516097	-	rRNA		LMOSA_r130	16S ribosomal RNA
2516141	-	rRNA		LMOSA_r130	16S ribosomal RNA
2516174	-	rRNA		LMOSA_r130	16S ribosomal RNA
2516197	-	rRNA		LMOSA_r130	16S ribosomal RNA
2516230	-	rRNA		LMOSA_r130	16S ribosomal RNA
2516239	-	rRNA		LMOSA_r130	16S ribosomal RNA
2516262	-	rRNA		LMOSA_r130	16S ribosomal RNA
2516270	-	rRNA		LMOSA_r130	16S ribosomal RNA
2516295	-	rRNA		LMOSA_r130	16S ribosomal RNA
2516303	-	rRNA		LMOSA_r130	16S ribosomal RNA
2516317	-	rRNA		LMOSA_r130	16S ribosomal RNA
2523320	-	CDS	EGJ25892.1	LMOSA_3320	Lichenan-specific phosphotransferase enzyme
2523330	-	CDS	EGJ25892.1	LMOSA_3320	Lichenan-specific phosphotransferase enzyme
2523357	-	CDS	EGJ25892.1	LMOSA_3320	Lichenan-specific phosphotransferase enzyme
2523461	-	CDS	EGJ25892.1	LMOSA_3320	Lichenan-specific phosphotransferase enzyme
2523550	-	CDS	EGJ25892.1	LMOSA_3320	Lichenan-specific phosphotransferase enzyme
2523583	-	CDS	EGJ25892.1	LMOSA_3320	Lichenan-specific phosphotransferase enzyme
2593963	-	intergenic region
2593978	-	intergenic region
2593986	-	intergenic region
2593995	-	intergenic region
2594034	-	intergenic region
2594134	-	intergenic region
2594182	-	intergenic region
2594200	-	intergenic region
2594235	-	intergenic region
2594271	-	intergenic region
2594290	-	intergenic region
2616005	-	CDS	EGJ25983.1	LMOSA_4240	Phosphoglycerate kinase
2616035	-	CDS	EGJ25983.1	LMOSA_4240	Phosphoglycerate kinase
2616133	-	CDS	EGJ25983.1	LMOSA_4240	Phosphoglycerate kinase
2616150	-	CDS	EGJ25983.1	LMOSA_4240	Phosphoglycerate kinase
2616192	-	CDS	EGJ25983.1	LMOSA_4240	Phosphoglycerate kinase
2616203	-	CDS	EGJ25983.1	LMOSA_4240	Phosphoglycerate kinase
2616252	-	CDS	EGJ25983.1	LMOSA_4240	Phosphoglycerate kinase
2616266	-	CDS	EGJ25983.1	LMOSA_4240	Phosphoglycerate kinase
2616295	-	CDS	EGJ25983.1	LMOSA_4240	Phosphoglycerate kinase
2616303	-	CDS	EGJ25983.1	LMOSA_4240	Phosphoglycerate kinase
2616327	-	CDS	EGJ25983.1	LMOSA_4240	Phosphoglycerate kinase
2616374	-	intergenic region
2616382	-	intergenic region
2616390	-	intergenic region
2616403	-	intergenic region
2616413	-	intergenic region
2616449	-	intergenic region
2616494	-	CDS	EGJ25984.1	LMOSA_4250	Glyceraldehyde-3-phosphate dehydrogenase
2616527	-	CDS	EGJ25984.1	LMOSA_4250	Glyceraldehyde-3-phosphate dehydrogenase
2616604	-	CDS	EGJ25984.1	LMOSA_4250	Glyceraldehyde-3-phosphate dehydrogenase
2616652	-	CDS	EGJ25984.1	LMOSA_4250	Glyceraldehyde-3-phosphate dehydrogenase
2616667	-	CDS	EGJ25984.1	LMOSA_4250	Glyceraldehyde-3-phosphate dehydrogenase
2616711	-	CDS	EGJ25984.1	LMOSA_4250	Glyceraldehyde-3-phosphate dehydrogenase
2616745	-	CDS	EGJ25984.1	LMOSA_4250	Glyceraldehyde-3-phosphate dehydrogenase
2616796	-	CDS	EGJ25984.1	LMOSA_4250	Glyceraldehyde-3-phosphate dehydrogenase
2616856	-	CDS	EGJ25984.1	LMOSA_4250	Glyceraldehyde-3-phosphate dehydrogenase
2616919	-	CDS	EGJ25984.1	LMOSA_4250	Glyceraldehyde-3-phosphate dehydrogenase
2616946	-	CDS	EGJ25984.1	LMOSA_4250	Glyceraldehyde-3-phosphate dehydrogenase
2616963	-	CDS	EGJ25984.1	LMOSA_4250	Glyceraldehyde-3-phosphate dehydrogenase
2616972	-	CDS	EGJ25984.1	LMOSA_4250	Glyceraldehyde-3-phosphate dehydrogenase
2616991	-	CDS	EGJ25984.1	LMOSA_4250	Glyceraldehyde-3-phosphate dehydrogenase
2616999	-	CDS	EGJ25984.1	LMOSA_4250	Glyceraldehyde-3-phosphate dehydrogenase
2617084	-	CDS	EGJ25984.1	LMOSA_4250	Glyceraldehyde-3-phosphate dehydrogenase
2617102	-	CDS	EGJ25984.1	LMOSA_4250	Glyceraldehyde-3-phosphate dehydrogenase
2617244	-	CDS	EGJ25984.1	LMOSA_4250	Glyceraldehyde-3-phosphate dehydrogenase
2617265	-	CDS	EGJ25984.1	LMOSA_4250	Glyceraldehyde-3-phosphate dehydrogenase
2617277	-	CDS	EGJ25984.1	LMOSA_4250	Glyceraldehyde-3-phosphate dehydrogenase
2617307	-	CDS	EGJ25984.1	LMOSA_4250	Glyceraldehyde-3-phosphate dehydrogenase
2617359	-	CDS	EGJ25984.1	LMOSA_4250	Glyceraldehyde-3-phosphate dehydrogenase
2617411	-	CDS	EGJ25984.1	LMOSA_4250	Glyceraldehyde-3-phosphate dehydrogenase
2617438	-	CDS	EGJ25984.1	LMOSA_4250	Glyceraldehyde-3-phosphate dehydrogenase
2617457	-	CDS	EGJ25984.1	LMOSA_4250	Glyceraldehyde-3-phosphate dehydrogenase
2617469	-	CDS	EGJ25984.1	LMOSA_4250	Glyceraldehyde-3-phosphate dehydrogenase
2617533	-	CDS	EGJ25985.1	LMOSA_4260	Central glycolytic product regulator
2617549	-	CDS	EGJ25985.1	LMOSA_4260	Central glycolytic product regulator
2617564	-	CDS	EGJ25985.1	LMOSA_4260	Central glycolytic product regulator
2646092	-	CDS	EGJ26011.1	LMOSA_4520	PspC domain protein
2646139	-	CDS	EGJ26011.1	LMOSA_4520	PspC domain protein
2646626	-	CDS	EGJ26012.1	LMOSA_4530	hypothetical protein
2646787	-	CDS	EGJ26012.1	LMOSA_4530	hypothetical protein
2646955	-	CDS	EGJ26012.1	LMOSA_4530	hypothetical protein
2646984	-	CDS	EGJ26012.1	LMOSA_4530	hypothetical protein
2646998	-	CDS	EGJ26012.1	LMOSA_4530	hypothetical protein
2647077	-	CDS	EGJ26012.1	LMOSA_4530	hypothetical protein
2647132	-	CDS	EGJ26012.1	LMOSA_4530	hypothetical protein
2647269	-	CDS	EGJ26012.1	LMOSA_4530	hypothetical protein
2647350	-	CDS	EGJ26012.1	LMOSA_4530	hypothetical protein
2647358	-	CDS	EGJ26012.1	LMOSA_4530	hypothetical protein
2647385	-	CDS	EGJ26012.1	LMOSA_4530	hypothetical protein
2647456	-	CDS	EGJ26012.1	LMOSA_4530	hypothetical protein
2647491	-	CDS	EGJ26012.1	LMOSA_4530	hypothetical protein
2647499	-	CDS	EGJ26012.1	LMOSA_4530	hypothetical protein
2647518	-	CDS	EGJ26012.1	LMOSA_4530	hypothetical protein
2647597	-	intergenic region
2675745	-	CDS	EGJ26036.1	LMOSA_4770	Sigma 54 modulation protein
2730427	-	intergenic region
2730457	-	CDS	EGJ26092.1	LMOSA_5330	hypothetical protein
2730545	-	CDS	EGJ26092.1	LMOSA_5330	hypothetical protein
2730578	-	CDS	EGJ26092.1	LMOSA_5330	hypothetical protein
2730628	-	CDS	EGJ26092.1	LMOSA_5330	hypothetical protein
2734632	-	CDS	EGJ26098.1	LMOSA_5390	Zinc-binding alcohol dehydrogenase protein
2734711	-	CDS	EGJ26098.1	LMOSA_5390	Zinc-binding alcohol dehydrogenase protein
2752033	-	rRNA		LMOSA_r60	5S ribosomal RNA
2752042	-	rRNA		LMOSA_r60	5S ribosomal RNA
2752093	-	rRNA		LMOSA_r60	5S ribosomal RNA
2752188	-	intergenic region
2752222	-	rRNA		LMOSA_r120	23S ribosomal RNA
2752234	-	rRNA		LMOSA_r120	23S ribosomal RNA
2752245	-	rRNA		LMOSA_r120	23S ribosomal RNA
2752256	-	rRNA		LMOSA_r120	23S ribosomal RNA
2752267	-	rRNA		LMOSA_r120	23S ribosomal RNA
2752280	-	rRNA		LMOSA_r120	23S ribosomal RNA
2752289	-	rRNA		LMOSA_r120	23S ribosomal RNA
2752305	-	rRNA		LMOSA_r120	23S ribosomal RNA
2752313	-	rRNA		LMOSA_r120	23S ribosomal RNA
2752324	-	rRNA		LMOSA_r120	23S ribosomal RNA
2752341	-	rRNA		LMOSA_r120	23S ribosomal RNA
2752382	-	rRNA		LMOSA_r120	23S ribosomal RNA
2752416	-	rRNA		LMOSA_r120	23S ribosomal RNA
2752453	-	rRNA		LMOSA_r120	23S ribosomal RNA
2752489	-	rRNA		LMOSA_r120	23S ribosomal RNA
2752497	-	rRNA		LMOSA_r120	23S ribosomal RNA
2752518	-	rRNA		LMOSA_r120	23S ribosomal RNA
2752552	-	rRNA		LMOSA_r120	23S ribosomal RNA
2752584	-	rRNA		LMOSA_r120	23S ribosomal RNA
2752606	-	rRNA		LMOSA_r120	23S ribosomal RNA
2752640	-	rRNA		LMOSA_r120	23S ribosomal RNA
2752651	-	rRNA		LMOSA_r120	23S ribosomal RNA
2752660	-	rRNA		LMOSA_r120	23S ribosomal RNA
2752678	-	rRNA		LMOSA_r120	23S ribosomal RNA
2752714	-	rRNA		LMOSA_r120	23S ribosomal RNA
2752816	-	rRNA		LMOSA_r120	23S ribosomal RNA
2752847	-	rRNA		LMOSA_r120	23S ribosomal RNA
2752865	-	rRNA		LMOSA_r120	23S ribosomal RNA
2752880	-	rRNA		LMOSA_r120	23S ribosomal RNA
2752918	-	rRNA		LMOSA_r120	23S ribosomal RNA
2752931	-	rRNA		LMOSA_r120	23S ribosomal RNA
2752975	-	rRNA		LMOSA_r120	23S ribosomal RNA
2753003	-	rRNA		LMOSA_r120	23S ribosomal RNA
2753032	-	rRNA		LMOSA_r120	23S ribosomal RNA
2753053	-	rRNA		LMOSA_r120	23S ribosomal RNA
2753108	-	rRNA		LMOSA_r120	23S ribosomal RNA
2753119	-	rRNA		LMOSA_r120	23S ribosomal RNA
2753136	-	rRNA		LMOSA_r120	23S ribosomal RNA
2753169	-	rRNA		LMOSA_r120	23S ribosomal RNA
2753179	-	rRNA		LMOSA_r120	23S ribosomal RNA
2753192	-	rRNA		LMOSA_r120	23S ribosomal RNA
2753229	-	rRNA		LMOSA_r120	23S ribosomal RNA
2753258	-	rRNA		LMOSA_r120	23S ribosomal RNA
2753321	-	rRNA		LMOSA_r120	23S ribosomal RNA
2753353	-	rRNA		LMOSA_r120	23S ribosomal RNA
2753426	-	rRNA		LMOSA_r120	23S ribosomal RNA
2753436	-	rRNA		LMOSA_r120	23S ribosomal RNA
2753448	-	rRNA		LMOSA_r120	23S ribosomal RNA
2753485	-	rRNA		LMOSA_r120	23S ribosomal RNA
2753500	-	rRNA		LMOSA_r120	23S ribosomal RNA
2753527	-	rRNA		LMOSA_r120	23S ribosomal RNA
2753548	-	rRNA		LMOSA_r120	23S ribosomal RNA
2753557	-	rRNA		LMOSA_r120	23S ribosomal RNA
2753585	-	rRNA		LMOSA_r120	23S ribosomal RNA
2753607	-	rRNA		LMOSA_r120	23S ribosomal RNA
2753634	-	rRNA		LMOSA_r120	23S ribosomal RNA
2753652	-	rRNA		LMOSA_r120	23S ribosomal RNA
2753671	-	rRNA		LMOSA_r120	23S ribosomal RNA
2753689	-	rRNA		LMOSA_r120	23S ribosomal RNA
2753697	-	rRNA		LMOSA_r120	23S ribosomal RNA
2753711	-	rRNA		LMOSA_r120	23S ribosomal RNA
2753793	-	rRNA		LMOSA_r120	23S ribosomal RNA
2753806	-	rRNA		LMOSA_r120	23S ribosomal RNA
2753831	-	rRNA		LMOSA_r120	23S ribosomal RNA
2753839	-	rRNA		LMOSA_r120	23S ribosomal RNA
2753852	-	rRNA		LMOSA_r120	23S ribosomal RNA
2753899	-	rRNA		LMOSA_r120	23S ribosomal RNA
2753911	-	rRNA		LMOSA_r120	23S ribosomal RNA
2753947	-	rRNA		LMOSA_r120	23S ribosomal RNA
2753985	-	rRNA		LMOSA_r120	23S ribosomal RNA
2754007	-	rRNA		LMOSA_r120	23S ribosomal RNA
2754016	-	rRNA		LMOSA_r120	23S ribosomal RNA
2754077	-	rRNA		LMOSA_r120	23S ribosomal RNA
2754114	-	rRNA		LMOSA_r120	23S ribosomal RNA
2754134	-	rRNA		LMOSA_r120	23S ribosomal RNA
2754169	-	rRNA		LMOSA_r120	23S ribosomal RNA
2754208	-	rRNA		LMOSA_r120	23S ribosomal RNA
2754237	-	rRNA		LMOSA_r120	23S ribosomal RNA
2754314	-	rRNA		LMOSA_r120	23S ribosomal RNA
2754329	-	rRNA		LMOSA_r120	23S ribosomal RNA
2754372	-	rRNA		LMOSA_r120	23S ribosomal RNA
2754389	-	rRNA		LMOSA_r120	23S ribosomal RNA
2754420	-	rRNA		LMOSA_r120	23S ribosomal RNA
2754447	-	rRNA		LMOSA_r120	23S ribosomal RNA
2754478	-	rRNA		LMOSA_r120	23S ribosomal RNA
2754504	-	rRNA		LMOSA_r120	23S ribosomal RNA
2754542	-	rRNA		LMOSA_r120	23S ribosomal RNA
2754593	-	rRNA		LMOSA_r120	23S ribosomal RNA
2754669	-	rRNA		LMOSA_r120	23S ribosomal RNA
2754683	-	rRNA		LMOSA_r120	23S ribosomal RNA
2754734	-	rRNA		LMOSA_r120	23S ribosomal RNA
2754750	-	rRNA		LMOSA_r120	23S ribosomal RNA
2754769	-	rRNA		LMOSA_r120	23S ribosomal RNA
2754790	-	rRNA		LMOSA_r120	23S ribosomal RNA
2754824	-	rRNA		LMOSA_r120	23S ribosomal RNA
2754840	-	rRNA		LMOSA_r120	23S ribosomal RNA
2754861	-	rRNA		LMOSA_r120	23S ribosomal RNA
2754915	-	rRNA		LMOSA_r120	23S ribosomal RNA
2754934	-	rRNA		LMOSA_r120	23S ribosomal RNA
2754947	-	rRNA		LMOSA_r120	23S ribosomal RNA
2754980	-	rRNA		LMOSA_r120	23S ribosomal RNA
2755038	-	rRNA		LMOSA_r120	23S ribosomal RNA
2755051	-	rRNA		LMOSA_r120	23S ribosomal RNA
2755095	-	rRNA		LMOSA_r120	23S ribosomal RNA
2755610	-	intergenic region
2755629	-	rRNA		LMOSA_r180	16S ribosomal RNA
2755643	-	rRNA		LMOSA_r180	16S ribosomal RNA
2755663	-	rRNA		LMOSA_r180	16S ribosomal RNA
2755727	-	rRNA		LMOSA_r180	16S ribosomal RNA
2755751	-	rRNA		LMOSA_r180	16S ribosomal RNA
2755798	-	rRNA		LMOSA_r180	16S ribosomal RNA
2755830	-	rRNA		LMOSA_r180	16S ribosomal RNA
2755866	-	rRNA		LMOSA_r180	16S ribosomal RNA
2755885	-	rRNA		LMOSA_r180	16S ribosomal RNA
2755921	-	rRNA		LMOSA_r180	16S ribosomal RNA
2755972	-	rRNA		LMOSA_r180	16S ribosomal RNA
2755983	-	rRNA		LMOSA_r180	16S ribosomal RNA
2756034	-	rRNA		LMOSA_r180	16S ribosomal RNA
2756045	-	rRNA		LMOSA_r180	16S ribosomal RNA
2756075	-	rRNA		LMOSA_r180	16S ribosomal RNA
2756111	-	rRNA		LMOSA_r180	16S ribosomal RNA
2756120	-	rRNA		LMOSA_r180	16S ribosomal RNA
2756141	-	rRNA		LMOSA_r180	16S ribosomal RNA
2756195	-	rRNA		LMOSA_r180	16S ribosomal RNA
2756214	-	rRNA		LMOSA_r180	16S ribosomal RNA
2756276	-	rRNA		LMOSA_r180	16S ribosomal RNA
2756292	-	rRNA		LMOSA_r180	16S ribosomal RNA
2756300	-	rRNA		LMOSA_r180	16S ribosomal RNA
2756328	-	rRNA		LMOSA_r180	16S ribosomal RNA
2756359	-	rRNA		LMOSA_r180	16S ribosomal RNA
2756369	-	rRNA		LMOSA_r180	16S ribosomal RNA
2756383	-	rRNA		LMOSA_r180	16S ribosomal RNA
2756457	-	rRNA		LMOSA_r180	16S ribosomal RNA
2756466	-	rRNA		LMOSA_r180	16S ribosomal RNA
2756498	-	rRNA		LMOSA_r180	16S ribosomal RNA
2756533	-	rRNA		LMOSA_r180	16S ribosomal RNA
2756544	-	rRNA		LMOSA_r180	16S ribosomal RNA
2756552	-	rRNA		LMOSA_r180	16S ribosomal RNA
2756562	-	rRNA		LMOSA_r180	16S ribosomal RNA
2756633	-	rRNA		LMOSA_r180	16S ribosomal RNA
2756641	-	rRNA		LMOSA_r180	16S ribosomal RNA
2756696	-	rRNA		LMOSA_r180	16S ribosomal RNA
2756714	-	rRNA		LMOSA_r180	16S ribosomal RNA
2756729	-	rRNA		LMOSA_r180	16S ribosomal RNA
2756747	-	rRNA		LMOSA_r180	16S ribosomal RNA
2756779	-	rRNA		LMOSA_r180	16S ribosomal RNA
2756812	-	rRNA		LMOSA_r180	16S ribosomal RNA
2756823	-	rRNA		LMOSA_r180	16S ribosomal RNA
2756855	-	rRNA		LMOSA_r180	16S ribosomal RNA
2756898	-	rRNA		LMOSA_r180	16S ribosomal RNA
2756931	-	rRNA		LMOSA_r180	16S ribosomal RNA
2756954	-	rRNA		LMOSA_r180	16S ribosomal RNA
2756987	-	rRNA		LMOSA_r180	16S ribosomal RNA
2756996	-	rRNA		LMOSA_r180	16S ribosomal RNA
2757019	-	rRNA		LMOSA_r180	16S ribosomal RNA
2757027	-	rRNA		LMOSA_r180	16S ribosomal RNA
2757052	-	rRNA		LMOSA_r180	16S ribosomal RNA
2757060	-	rRNA		LMOSA_r180	16S ribosomal RNA
2757074	-	rRNA		LMOSA_r180	16S ribosomal RNA
2757224	-	intergenic region
2757282	-	intergenic region
2757309	-	intergenic region
2771293	-	CDS	EGJ26131.1	LMOSA_5730	DNA-directed RNA polymerase subunit alpha
2771914	-	CDS	EGJ26131.1	LMOSA_5730	DNA-directed RNA polymerase subunit alpha
2772066	-	intergenic region
2772104	-	CDS	EGJ26132.1	LMOSA_5740	30S ribosomal protein S11
2772119	-	CDS	EGJ26132.1	LMOSA_5740	30S ribosomal protein S11
2772162	-	CDS	EGJ26132.1	LMOSA_5740	30S ribosomal protein S11
2772518	-	CDS	EGJ26133.1	LMOSA_5750	30S ribosomal protein S13
2772652	-	CDS	EGJ26133.1	LMOSA_5750	30S ribosomal protein S13
2772934	-	CDS	EGJ26134.1	LMOSA_5760	50S ribosomal protein L36
2773168	-	CDS	EGJ26135.1	LMOSA_5770	Translation initiation factor IF-1
2773229	-	CDS	EGJ26135.1	LMOSA_5770	Translation initiation factor IF-1
2789353	-	CDS	EGJ26162.1	LMOSA_6040	FMN-binding protein
2789361	-	CDS	EGJ26162.1	LMOSA_6040	FMN-binding protein
2789409	-	intergenic region
2825604	+	CDS	EGJ26198.1	LMOSA_6400	Universal stress protein
2825677	+	CDS	EGJ26198.1	LMOSA_6400	Universal stress protein
2825716	+	CDS	EGJ26198.1	LMOSA_6400	Universal stress protein
2825761	+	CDS	EGJ26198.1	LMOSA_6400	Universal stress protein
2825779	+	CDS	EGJ26198.1	LMOSA_6400	Universal stress protein
2825815	+	CDS	EGJ26198.1	LMOSA_6400	Universal stress protein
2825835	+	CDS	EGJ26198.1	LMOSA_6400	Universal stress protein
2825922	+	CDS	EGJ26198.1	LMOSA_6400	Universal stress protein
2826093	+	CDS	EGJ26199.1	LMOSA_6410	Ribose 5-phosphate isomerase
2826115	+	CDS	EGJ26199.1	LMOSA_6410	Ribose 5-phosphate isomerase
2851903	+	CDS	EGJ26221.1	LMOSA_6630	hypothetical protein
2851991	+	CDS	EGJ26221.1	LMOSA_6630	hypothetical protein
2852040	+	CDS	EGJ26221.1	LMOSA_6630	hypothetical protein
2852248	+	CDS	EGJ26222.1	LMOSA_6640	Dihydroxyacetone kinase
2863083	-	intergenic region
2863101	-	intergenic region
2863315	-	intergenic region
2863332	-	intergenic region
2866015	-	CDS	EGJ26238.1	LMOSA_6800	Secreted protein
2866599	-	CDS	EGJ26239.1	MOSA_6810
2866683	-	CDS	EGJ26239.1	MOSA_6810
2866715	-	CDS	EGJ26239.1	MOSA_6810
