# Supplementary material for: RNA editing, RNA modifications, and transcriptional units in Listeria monocytogenes
Source: Research Square preprint supplement (doi:10.21203/rs.3.rs-1530110/v1), 2022-04-21
Supplement: Supplementary file 19 [file f60acddf19d34fc0ab879fec.xlsx]

## Sheet: R173_modifications_chromosome
Table S8. Position of RNA modifications predicted using direct RNA-seq data in RO15 400 MPa treated sample at time point 24 h.
Position	RNA_mod_strand	feature	Protein ID	Locus Tag	Product	gene name	DNA_mod_seen	DNA_mod_strand	DNA_mod_type
4338	+	CDS	CAB3278121.1	CPFDLNE_00004	RNA binding protein involved in ribosome maturation	-	No
4392	+	CDS	CAB3278121.1	CPFDLNE_00004	RNA binding protein involved in ribosome maturation	-	No
4417	+	CDS	CAB3278121.1	CPFDLNE_00004	RNA binding protein involved in ribosome maturation	-	No
4440	+	CDS	CAB3278121.1	CPFDLNE_00004	RNA binding protein involved in ribosome maturation	-	No
4478	+	CDS	CAB3278121.1	CPFDLNE_00004	RNA binding protein involved in ribosome maturation	-	No
4496	+	CDS	CAB3278121.1	CPFDLNE_00004	RNA binding protein involved in ribosome maturation	-	No
4560	+	CDS	CAB3278122.1	OCPFDLNE_00005	DNA replication and repair protein RecF	recF_1	No
4684	+	CDS	CAB3278122.1	OCPFDLNE_00005	DNA replication and repair protein RecF	recF_1	No
4698	+	CDS	CAB3278122.1	OCPFDLNE_00005	DNA replication and repair protein RecF	recF_1	Yes	-	modified_base
4708	+	CDS	CAB3278122.1	OCPFDLNE_00005	DNA replication and repair protein RecF	recF_1	Yes	-	modified_base
4721	+	CDS	CAB3278122.1	OCPFDLNE_00005	DNA replication and repair protein RecF	recF_1	No
4742	+	CDS	CAB3278122.1	OCPFDLNE_00005	DNA replication and repair protein RecF	recF_1	Yes	-	modified_base
4761	+	CDS	CAB3278122.1	OCPFDLNE_00005	DNA replication and repair protein RecF	recF_1	No
4836	+	CDS	CAB3278122.1	OCPFDLNE_00005	DNA replication and repair protein RecF	recF_1	No
4904	+	CDS	CAB3278122.1	OCPFDLNE_00005	DNA replication and repair protein RecF	recF_1	No
4934	+	CDS	CAB3278122.1	OCPFDLNE_00005	DNA replication and repair protein RecF	recF_1	Yes	+	m4C
5047	+	CDS	CAB3278122.1	OCPFDLNE_00005	DNA replication and repair protein RecF	recF_1	Yes	-	modified_base
5113	+	CDS	CAB3278122.1	OCPFDLNE_00005	DNA replication and repair protein RecF	recF_1	Yes	-	modified_base
5129	+	CDS	CAB3278122.1	OCPFDLNE_00005	DNA replication and repair protein RecF	recF_1	Yes	+	m4C
5274	+	CDS	CAB3278122.1	OCPFDLNE_00005	DNA replication and repair protein RecF	recF_1	No
5351	+	CDS	CAB3278122.1	OCPFDLNE_00005	DNA replication and repair protein RecF	recF_1	No
5420	+	CDS	CAB3278122.1	OCPFDLNE_00005	DNA replication and repair protein RecF	recF_1	Yes	+	m4C
5500	+	CDS	CAB3278122.1	OCPFDLNE_00005	DNA replication and repair protein RecF	recF_1	No
5517	+	CDS	CAB3278122.1	OCPFDLNE_00005	DNA replication and repair protein RecF	recF_1	No
5557	+	CDS	CAB3278122.1	OCPFDLNE_00005	DNA replication and repair protein RecF	recF_1	No
5684	+	intergenic region	-	-	-	-	No
6071	+	CDS	CAB3278123.1	OCPFDLNE_00006	DNA gyrase subunit B	gyrB	No
6222	+	CDS	CAB3278123.1	OCPFDLNE_00006	DNA gyrase subunit B	gyrB	No
6252	+	CDS	CAB3278123.1	OCPFDLNE_00006	DNA gyrase subunit B	gyrB	Yes	-	m4C
8414	+	CDS	CAB3278124.1	OCPFDLNE_00007	DNA gyrase subunit A	gyrA	No
12608	+	CDS	CAB3278127.1	OCPFDLNE_00010	D-glycero-alpha-D-manno-heptose 7-phosphate kinase	galK	No
12699	+	CDS	CAB3278127.1	OCPFDLNE_00010	D-glycero-alpha-D-manno-heptose 7-phosphate kinase	galK	No
12762	+	CDS	CAB3278127.1	OCPFDLNE_00010	D-glycero-alpha-D-manno-heptose 7-phosphate kinase	galK	No
13064	+	CDS	CAB3278127.1	OCPFDLNE_00010	D-glycero-alpha-D-manno-heptose 7-phosphate kinase	galK	No
15840	+	intergenic region	-	-	-	-	No
16009	+	CDS	CAB3278130.1	OCPFDLNE_00013	Quinol oxidase subunit 2	qoxA	No
16140	+	CDS	CAB3278130.1	OCPFDLNE_00013	Quinol oxidase subunit 2	qoxA	No
16159	+	CDS	CAB3278130.1	OCPFDLNE_00013	Quinol oxidase subunit 2	qoxA	No
16245	+	CDS	CAB3278130.1	OCPFDLNE_00013	Quinol oxidase subunit 2	qoxA	No
16266	+	CDS	CAB3278130.1	OCPFDLNE_00013	Quinol oxidase subunit 2	qoxA	No
16337	+	CDS	CAB3278130.1	OCPFDLNE_00013	Quinol oxidase subunit 2	qoxA	Yes	-	modified_base
16413	+	CDS	CAB3278130.1	OCPFDLNE_00013	Quinol oxidase subunit 2	qoxA	Yes	-	modified_base
16437	+	CDS	CAB3278130.1	OCPFDLNE_00013	Quinol oxidase subunit 2	qoxA	Yes	+	modified_base
16469	+	CDS	CAB3278130.1	OCPFDLNE_00013	Quinol oxidase subunit 2	qoxA	No
16493	+	CDS	CAB3278130.1	OCPFDLNE_00013	Quinol oxidase subunit 2	qoxA	Yes	+	modified_base
16535	+	CDS	CAB3278130.1	OCPFDLNE_00013	Quinol oxidase subunit 2	qoxA	No
16562	+	CDS	CAB3278130.1	OCPFDLNE_00013	Quinol oxidase subunit 2	qoxA	Yes	+	modified_base
16632	+	CDS	CAB3278130.1	OCPFDLNE_00013	Quinol oxidase subunit 2	qoxA	No
16667	+	CDS	CAB3278130.1	OCPFDLNE_00013	Quinol oxidase subunit 2	qoxA	No
16722	+	CDS	CAB3278130.1	OCPFDLNE_00013	Quinol oxidase subunit 2	qoxA	No
16769	+	CDS	CAB3278130.1	OCPFDLNE_00013	Quinol oxidase subunit 2	qoxA	No
16843	+	CDS	CAB3278130.1	OCPFDLNE_00013	Quinol oxidase subunit 2	qoxA	No
16917	+	CDS	CAB3278130.1	OCPFDLNE_00013	Quinol oxidase subunit 2	qoxA	No
16932	+	CDS	CAB3278130.1	OCPFDLNE_00013	Quinol oxidase subunit 2	qoxA	No
16941	+	CDS	CAB3278130.1	OCPFDLNE_00013	Quinol oxidase subunit 2	qoxA	No
16951	+	CDS	CAB3278130.1	OCPFDLNE_00013	Quinol oxidase subunit 2	qoxA	No
17000	+	CDS	CAB3278130.1	OCPFDLNE_00013	Quinol oxidase subunit 2	qoxA	Yes	-	modified_base
17012	+	intergenic region	-	-	-	-	Yes	+	modified_base
18339	+	CDS	CAB3278131.1	OCPFDLNE_00014	Cytochrome o ubiquinol oxidase subunit I	qoxB	Yes	-	m4C
18621	+	CDS	CAB3278131.1	OCPFDLNE_00014	Cytochrome o ubiquinol oxidase subunit I	qoxB	No
18690	+	CDS	CAB3278131.1	OCPFDLNE_00014	Cytochrome o ubiquinol oxidase subunit I	qoxB	No
18875	+	CDS	CAB3278131.1	OCPFDLNE_00014	Cytochrome o ubiquinol oxidase subunit I	qoxB	No
53300	+	intergenic region	-	-	-	-	No
53375	+	CDS	CAB3278167.1	OCPFDLNE_00050	30S ribosomal protein S6	rpsF	No
53419	+	CDS	CAB3278167.1	OCPFDLNE_00050	30S ribosomal protein S6	rpsF	No
53574	+	CDS	CAB3278167.1	OCPFDLNE_00050	30S ribosomal protein S6	rpsF	No
53622	+	CDS	CAB3278167.1	OCPFDLNE_00050	30S ribosomal protein S6	rpsF	Yes	-	modified_base
54014	+	CDS	CAB3278168.1	OCPFDLNE_00051	Single-stranded DNA-binding protein A	ssbA_1	No
54693	+	CDS	CAB3278170.1	CPFDLNE_00053	Peptidase propeptide and ypeb domain subfamily	-	No
54711	+	CDS	CAB3278170.1	CPFDLNE_00053	Peptidase propeptide and ypeb domain subfamily	-	Yes	-	modified_base
54767	+	CDS	CAB3278170.1	CPFDLNE_00053	Peptidase propeptide and ypeb domain subfamily	-	No
54914	+	CDS	CAB3278170.1	CPFDLNE_00053	Peptidase propeptide and ypeb domain subfamily	-	No
54942	+	CDS	CAB3278170.1	CPFDLNE_00053	Peptidase propeptide and ypeb domain subfamily	-	Yes	+	modified_base
54979	+	CDS	CAB3278170.1	CPFDLNE_00053	Peptidase propeptide and ypeb domain subfamily	-	Yes	-	modified_base
55040	+	CDS	CAB3278170.1	CPFDLNE_00053	Peptidase propeptide and ypeb domain subfamily	-	No
55061	+	CDS	CAB3278170.1	CPFDLNE_00053	Peptidase propeptide and ypeb domain subfamily	-	Yes	+	modified_base
55069	+	CDS	CAB3278170.1	CPFDLNE_00053	Peptidase propeptide and ypeb domain subfamily	-	Yes	-	modified_base
55082	+	CDS	CAB3278170.1	CPFDLNE_00053	Peptidase propeptide and ypeb domain subfamily	-	No
55107	+	CDS	CAB3278170.1	CPFDLNE_00053	Peptidase propeptide and ypeb domain subfamily	-	No
55139	+	CDS	CAB3278170.1	CPFDLNE_00053	Peptidase propeptide and ypeb domain subfamily	-	No
55174	+	CDS	CAB3278170.1	CPFDLNE_00053	Peptidase propeptide and ypeb domain subfamily	-	No
55198	+	CDS	CAB3278170.1	CPFDLNE_00053	Peptidase propeptide and ypeb domain subfamily	-	No
55274	+	CDS	CAB3278170.1	CPFDLNE_00053	Peptidase propeptide and ypeb domain subfamily	-	No
55293	+	CDS	CAB3278170.1	CPFDLNE_00053	Peptidase propeptide and ypeb domain subfamily	-	No
55560	+	CDS	CAB3278171.1	OCPFDLNE_00054	Regulator	agrB	Yes	+	modified_base
55575	+	CDS	CAB3278171.1	OCPFDLNE_00054	Regulator	agrB	No
55591	+	CDS	CAB3278171.1	OCPFDLNE_00054	Regulator	agrB	No
55607	+	CDS	CAB3278171.1	OCPFDLNE_00054	Regulator	agrB	Yes	-	modified_base
55637	+	CDS	CAB3278171.1	OCPFDLNE_00054	Regulator	agrB	Yes	+	modified_base
55657	+	CDS	CAB3278171.1	OCPFDLNE_00054	Regulator	agrB	No
55726	+	CDS	CAB3278171.1	OCPFDLNE_00054	Regulator	agrB	No
55844	+	CDS	CAB3278171.1	OCPFDLNE_00054	Regulator	agrB	No
55902	+	CDS	CAB3278171.1	OCPFDLNE_00054	Regulator	agrB	Yes	+	modified_base
55933	+	CDS	CAB3278171.1	OCPFDLNE_00054	Regulator	agrB	No
55952	+	CDS	CAB3278171.1	OCPFDLNE_00054	Regulator	agrB	Yes	-	m4C
55961	+	CDS	CAB3278171.1	OCPFDLNE_00054	Regulator	agrB	No
55979	+	CDS	CAB3278171.1	OCPFDLNE_00054	Regulator	agrB	Yes	-	modified_base
56014	+	CDS	CAB3278171.1	OCPFDLNE_00054	Regulator	agrB	No
56067	+	CDS	CAB3278171.1	OCPFDLNE_00054	Regulator	agrB	No
56088	+	CDS	CAB3278171.1	OCPFDLNE_00054	Regulator	agrB	No
56105	+	CDS	CAB3278171.1	OCPFDLNE_00054	Regulator	agrB	Yes	-	modified_base
56207	+	CDS	CAB3278172.1	CPFDLNE_00055	Accessory gene regulator protein D	-	No
56218	+	CDS	CAB3278172.1	CPFDLNE_00055	Accessory gene regulator protein D	-	No
56241	+	CDS	CAB3278172.1	CPFDLNE_00055	Accessory gene regulator protein D	-	No
56273	+	CDS	CAB3278172.1	CPFDLNE_00055	Accessory gene regulator protein D	-	Yes	-	modified_base
56398	+	intergenic region	-	-	-	-	No
56429	+	CDS	CAB3278173.1	OCPFDLNE_00056	Accessory transcriptional regulator protein C	dpiB	Yes	-	modified_base
56486	+	CDS	CAB3278173.1	OCPFDLNE_00056	Accessory transcriptional regulator protein C	dpiB	Yes	+	modified_base
56570	+	CDS	CAB3278173.1	OCPFDLNE_00056	Accessory transcriptional regulator protein C	dpiB	No
56597	+	CDS	CAB3278173.1	OCPFDLNE_00056	Accessory transcriptional regulator protein C	dpiB	No
56655	+	CDS	CAB3278173.1	OCPFDLNE_00056	Accessory transcriptional regulator protein C	dpiB	No
56708	+	CDS	CAB3278173.1	OCPFDLNE_00056	Accessory transcriptional regulator protein C	dpiB	Yes	-	m4C
56727	+	CDS	CAB3278173.1	OCPFDLNE_00056	Accessory transcriptional regulator protein C	dpiB	No
56820	+	CDS	CAB3278173.1	OCPFDLNE_00056	Accessory transcriptional regulator protein C	dpiB	No
56839	+	CDS	CAB3278173.1	OCPFDLNE_00056	Accessory transcriptional regulator protein C	dpiB	No
56987	+	CDS	CAB3278173.1	OCPFDLNE_00056	Accessory transcriptional regulator protein C	dpiB	No
57083	+	CDS	CAB3278173.1	OCPFDLNE_00056	Accessory transcriptional regulator protein C	dpiB	No
57156	+	CDS	CAB3278173.1	OCPFDLNE_00056	Accessory transcriptional regulator protein C	dpiB	Yes	+	modified_base
57202	+	CDS	CAB3278173.1	OCPFDLNE_00056	Accessory transcriptional regulator protein C	dpiB	No
57367	+	CDS	CAB3278173.1	OCPFDLNE_00056	Accessory transcriptional regulator protein C	dpiB	No
57551	+	CDS	CAB3278173.1	OCPFDLNE_00056	Accessory transcriptional regulator protein C	dpiB	No
57591	+	CDS	CAB3278173.1	OCPFDLNE_00056	Accessory transcriptional regulator protein C	dpiB	Yes	+	modified_base
57707	+	CDS	CAB3278173.1	OCPFDLNE_00056	Accessory transcriptional regulator protein C	dpiB	No
57720	+	intergenic region	-	-	-	-	No
57769	+	CDS	CAB3278174.1	OCPFDLNE_00057	Accessory transcriptional regulator protein A	agrA	No
57789	+	CDS	CAB3278174.1	OCPFDLNE_00057	Accessory transcriptional regulator protein A	agrA	Yes	+	modified_base
57856	+	CDS	CAB3278174.1	OCPFDLNE_00057	Accessory transcriptional regulator protein A	agrA	No
57870	+	CDS	CAB3278174.1	OCPFDLNE_00057	Accessory transcriptional regulator protein A	agrA	No
58045	+	CDS	CAB3278174.1	OCPFDLNE_00057	Accessory transcriptional regulator protein A	agrA	Yes	-	m4C
58202	+	CDS	CAB3278174.1	OCPFDLNE_00057	Accessory transcriptional regulator protein A	agrA	Yes	-	modified_base
58316	+	CDS	CAB3278174.1	OCPFDLNE_00057	Accessory transcriptional regulator protein A	agrA	No
109463	+	CDS	CAB3278220.1	OCPFDLNE_00104	Fructose-specific phosphotransferase enzyme IIB component	manX_1	No
109503	+	CDS	CAB3278220.1	OCPFDLNE_00104	Fructose-specific phosphotransferase enzyme IIB component	manX_1	No
109825	+	CDS	CAB3278220.1	OCPFDLNE_00104	Fructose-specific phosphotransferase enzyme IIB component	manX_1	No
109863	+	CDS	CAB3278220.1	OCPFDLNE_00104	Fructose-specific phosphotransferase enzyme IIB component	manX_1	Yes	+	m6A
109872	+	CDS	CAB3278220.1	OCPFDLNE_00104	Fructose-specific phosphotransferase enzyme IIB component	manX_1	Yes	+	modified_base
109906	+	CDS	CAB3278220.1	OCPFDLNE_00104	Fructose-specific phosphotransferase enzyme IIB component	manX_1	Yes	-	modified_base
110827	+	CDS	CAB3278221.1	OCPFDLNE_00105	PTS system mannose-specific transporter subunit IIC	sorA	Yes	+	modified_base
111027	+	CDS	CAB3278221.1	OCPFDLNE_00105	PTS system mannose-specific transporter subunit IIC	sorA	No
166332	+	CDS	CAB3278283.1	OCPFDLNE_00167	DNA polymerase III clamp loader delta' subunit	dnaX_1	No
166471	+	CDS	CAB3278283.1	OCPFDLNE_00167	DNA polymerase III clamp loader delta' subunit	dnaX_1	Yes	+	modified_base
166640	+	CDS	CAB3278283.1	OCPFDLNE_00167	DNA polymerase III clamp loader delta' subunit	dnaX_1	No
166649	+	CDS	CAB3278283.1	OCPFDLNE_00167	DNA polymerase III clamp loader delta' subunit	dnaX_1	Yes	-	modified_base
166659	+	CDS	CAB3278283.1	OCPFDLNE_00167	DNA polymerase III clamp loader delta' subunit	dnaX_1	No
166672	+	CDS	CAB3278283.1	OCPFDLNE_00167	DNA polymerase III clamp loader delta' subunit	dnaX_1	Yes	-	modified_base
166865	+	CDS	CAB3278283.1	OCPFDLNE_00167	DNA polymerase III clamp loader delta' subunit	dnaX_1	Yes	-	modified_base
166873	+	CDS	CAB3278283.1	OCPFDLNE_00167	DNA polymerase III clamp loader delta' subunit	dnaX_1	No
170901	+	CDS	CAB3278290.1	OCPFDLNE_00174	Glucose uptake protein GlcU	glcU_1	Yes	-	modified_base
170946	+	CDS	CAB3278290.1	OCPFDLNE_00174	Glucose uptake protein GlcU	glcU_1	Yes	-	modified_base
170973	+	CDS	CAB3278290.1	OCPFDLNE_00174	Glucose uptake protein GlcU	glcU_1	No
171109	+	CDS	CAB3278290.1	OCPFDLNE_00174	Glucose uptake protein GlcU	glcU_1	No
171312	+	CDS	CAB3278290.1	OCPFDLNE_00174	Glucose uptake protein GlcU	glcU_1	Yes	+	m4C
171833	+	CDS	CAB3278291.1	CPFDLNE_00175	hypothetical protein	-	Yes	+	modified_base
172022	+	CDS	CAB3278291.1	CPFDLNE_00175	hypothetical protein	-	Yes	-	modified_base
172037	+	CDS	CAB3278291.1	CPFDLNE_00175	hypothetical protein	-	No
172055	+	CDS	CAB3278291.1	CPFDLNE_00175	hypothetical protein	-	Yes	-	m4C
172101	+	CDS	CAB3278291.1	CPFDLNE_00175	hypothetical protein	-	No
172115	+	CDS	CAB3278291.1	CPFDLNE_00175	hypothetical protein	-	No
172180	+	CDS	CAB3278291.1	CPFDLNE_00175	hypothetical protein	-	No
197397	+	intergenic region	-	-	-	-	No
197425	+	CDS	CAB3278309.1	OCPFDLNE_00193	Protein Veg	veg	No
197433	+	CDS	CAB3278309.1	OCPFDLNE_00193	Protein Veg	veg	No
197555	+	CDS	CAB3278309.1	OCPFDLNE_00193	Protein Veg	veg	Yes	-	modified_base
197595	+	CDS	CAB3278309.1	OCPFDLNE_00193	Protein Veg	veg	No
197610	+	CDS	CAB3278309.1	OCPFDLNE_00193	Protein Veg	veg	No
197632	+	CDS	CAB3278309.1	OCPFDLNE_00193	Protein Veg	veg	Yes	-	modified_base
197660	+	intergenic region	-	-	-	-	No
197673	+	intergenic region	-	-	-	-	No
203878	+	intergenic region	-	-	-	-	No
203890	+	intergenic region	-	-	-	-	No
203917	+	CDS	CAB3278316.1	OCPFDLNE_00200	Septation protein spoVG	spoVG_1	No
203933	+	CDS	CAB3278316.1	OCPFDLNE_00200	Septation protein spoVG	spoVG_1	No
203981	+	CDS	CAB3278316.1	OCPFDLNE_00200	Septation protein spoVG	spoVG_1	Yes	+	modified_base
204010	+	CDS	CAB3278316.1	OCPFDLNE_00200	Septation protein spoVG	spoVG_1	No
204042	+	CDS	CAB3278316.1	OCPFDLNE_00200	Septation protein spoVG	spoVG_1	No
204054	+	CDS	CAB3278316.1	OCPFDLNE_00200	Septation protein spoVG	spoVG_1	No
204073	+	CDS	CAB3278316.1	OCPFDLNE_00200	Septation protein spoVG	spoVG_1	No
204094	+	CDS	CAB3278316.1	OCPFDLNE_00200	Septation protein spoVG	spoVG_1	No
204140	+	CDS	CAB3278316.1	OCPFDLNE_00200	Septation protein spoVG	spoVG_1	No
204167	+	CDS	CAB3278316.1	OCPFDLNE_00200	Septation protein spoVG	spoVG_1	No
204182	+	CDS	CAB3278316.1	OCPFDLNE_00200	Septation protein spoVG	spoVG_1	Yes	+	m4C
204251	+	intergenic region	-	-	-	-	No
204260	+	intergenic region	-	-	-	-	No
204276	+	intergenic region	-	-	-	-	Yes	-	modified_base
204295	+	intergenic region	-	-	-	-	No
204309	+	intergenic region	-	-	-	-	No
204331	+	CDS	CAB3278317.1	OCPFDLNE_00201	Septation protein spoVG	spoVG_2	Yes	-	modified_base
204402	+	CDS	CAB3278317.1	OCPFDLNE_00201	Septation protein spoVG	spoVG_2	No
205819	+	CDS	CAB3278318.1	OCPFDLNE_00202	Bifunctional UDP-N-acetylglucosamine diphosphorylase/glucosamine-1-phosphate N-acetyltransferase GlmU	glmU	Yes	+	modified_base
205888	+	CDS	CAB3278318.1	OCPFDLNE_00202	Bifunctional UDP-N-acetylglucosamine diphosphorylase/glucosamine-1-phosphate N-acetyltransferase GlmU	glmU	No
205972	+	CDS	CAB3278318.1	OCPFDLNE_00202	Bifunctional UDP-N-acetylglucosamine diphosphorylase/glucosamine-1-phosphate N-acetyltransferase GlmU	glmU	No
218364	-	CDS	CAB3278330.1	OCPFDLNE_00214	L-lactate dehydrogenase	ldh_1	No
218425	-	CDS	CAB3278330.1	OCPFDLNE_00214	L-lactate dehydrogenase	ldh_1	No
218458	-	CDS	CAB3278330.1	OCPFDLNE_00214	L-lactate dehydrogenase	ldh_1	No
218581	-	CDS	CAB3278330.1	OCPFDLNE_00214	L-lactate dehydrogenase	ldh_1	Yes	-	modified_base
218592	-	CDS	CAB3278330.1	OCPFDLNE_00214	L-lactate dehydrogenase	ldh_1	Yes	-	modified_base
218727	-	CDS	CAB3278330.1	OCPFDLNE_00214	L-lactate dehydrogenase	ldh_1	No
218739	-	CDS	CAB3278330.1	OCPFDLNE_00214	L-lactate dehydrogenase	ldh_1	Yes	-	modified_base
218911	-	CDS	CAB3278330.1	OCPFDLNE_00214	L-lactate dehydrogenase	ldh_1	No
218928	-	CDS	CAB3278330.1	OCPFDLNE_00214	L-lactate dehydrogenase	ldh_1	Yes	-	modified_base
219015	-	CDS	CAB3278330.1	OCPFDLNE_00214	L-lactate dehydrogenase	ldh_1	Yes	+	modified_base
219088	-	CDS	CAB3278330.1	OCPFDLNE_00214	L-lactate dehydrogenase	ldh_1	Yes	+	modified_base
219117	-	CDS	CAB3278330.1	OCPFDLNE_00214	L-lactate dehydrogenase	ldh_1	Yes	-	modified_base
219141	-	CDS	CAB3278330.1	OCPFDLNE_00214	L-lactate dehydrogenase	ldh_1	Yes	+	m4C
219170	-	CDS	CAB3278330.1	OCPFDLNE_00214	L-lactate dehydrogenase	ldh_1	No
219301	-	intergenic region	-	-	-	-	Yes	-	m4C
219343	-	intergenic region	-	-	-	-	Yes	-	m4C
219570	+	CDS	CAB3278331.1	OCPFDLNE_00215	General stress protein CTC	ctc	Yes	-	modified_base
219595	+	CDS	CAB3278331.1	OCPFDLNE_00215	General stress protein CTC	ctc	No
219706	+	CDS	CAB3278331.1	OCPFDLNE_00215	General stress protein CTC	ctc	No
219717	+	CDS	CAB3278331.1	OCPFDLNE_00215	General stress protein CTC	ctc	Yes	+	m4C
219770	+	CDS	CAB3278331.1	OCPFDLNE_00215	General stress protein CTC	ctc	No
219787	+	CDS	CAB3278331.1	OCPFDLNE_00215	General stress protein CTC	ctc	No
219814	+	CDS	CAB3278331.1	OCPFDLNE_00215	General stress protein CTC	ctc	Yes	+	modified_base
219823	+	CDS	CAB3278331.1	OCPFDLNE_00215	General stress protein CTC	ctc	Yes	-	modified_base
219843	+	CDS	CAB3278331.1	OCPFDLNE_00215	General stress protein CTC	ctc	No
219851	+	CDS	CAB3278331.1	OCPFDLNE_00215	General stress protein CTC	ctc	No
219874	+	CDS	CAB3278331.1	OCPFDLNE_00215	General stress protein CTC	ctc	Yes	+	modified_base
219901	+	CDS	CAB3278331.1	OCPFDLNE_00215	General stress protein CTC	ctc	No
219974	+	CDS	CAB3278331.1	OCPFDLNE_00215	General stress protein CTC	ctc	No
227275	+	intergenic region	-	-	-	-	Yes	+	modified_base
227298	+	CDS	CAB3278337.1	OCPFDLNE_00221	Cell division protein DivIC	divIC	Yes	+	modified_base
227451	+	CDS	CAB3278337.1	OCPFDLNE_00221	Cell division protein DivIC	divIC	No
227837	+	CDS	CAB3278338.1	OCPFDLNE_00222	RNA binding protein	yugI_1	No
227899	+	CDS	CAB3278338.1	OCPFDLNE_00222	RNA binding protein	yugI_1	No
241003	+	intergenic region	-	-	-	-	No
241035	+	intergenic region	-	-	-	-	No
241067	+	intergenic region	-	-	-	-	No
241126	+	intergenic region	-	-	-	-	No
241360	+	rRNA		OCPFDLNE_00233	16S ribosomal RNA	-	No
241374	+	rRNA		OCPFDLNE_00233	16S ribosomal RNA	-	No
241382	+	rRNA		OCPFDLNE_00233	16S ribosomal RNA	-	No
241407	+	rRNA		OCPFDLNE_00233	16S ribosomal RNA	-	No
241415	+	rRNA		OCPFDLNE_00233	16S ribosomal RNA	-	No
241445	+	rRNA		OCPFDLNE_00233	16S ribosomal RNA	-	No
241480	+	rRNA		OCPFDLNE_00233	16S ribosomal RNA	-	No
241503	+	rRNA		OCPFDLNE_00233	16S ribosomal RNA	-	No
241536	+	rRNA		OCPFDLNE_00233	16S ribosomal RNA	-	No
241580	+	rRNA		OCPFDLNE_00233	16S ribosomal RNA	-	No
241611	+	rRNA		OCPFDLNE_00233	16S ribosomal RNA	-	No
241622	+	rRNA		OCPFDLNE_00233	16S ribosomal RNA	-	No
241655	+	rRNA		OCPFDLNE_00233	16S ribosomal RNA	-	No
241687	+	rRNA		OCPFDLNE_00233	16S ribosomal RNA	-	No
241705	+	rRNA		OCPFDLNE_00233	16S ribosomal RNA	-	No
241720	+	rRNA		OCPFDLNE_00233	16S ribosomal RNA	-	No
241738	+	rRNA		OCPFDLNE_00233	16S ribosomal RNA	-	No
241793	+	rRNA		OCPFDLNE_00233	16S ribosomal RNA	-	Yes	+	m4C
241801	+	rRNA		OCPFDLNE_00233	16S ribosomal RNA	-	No
241872	+	rRNA		OCPFDLNE_00233	16S ribosomal RNA	-	No
241882	+	rRNA		OCPFDLNE_00233	16S ribosomal RNA	-	No
241890	+	rRNA		OCPFDLNE_00233	16S ribosomal RNA	-	No
241901	+	rRNA		OCPFDLNE_00233	16S ribosomal RNA	-	Yes	+	modified_base
241936	+	rRNA		OCPFDLNE_00233	16S ribosomal RNA	-	Yes	+	modified_base
241968	+	rRNA		OCPFDLNE_00233	16S ribosomal RNA	-	Yes	-	m4C
241977	+	rRNA		OCPFDLNE_00233	16S ribosomal RNA	-	No
241985	+	rRNA		OCPFDLNE_00233	16S ribosomal RNA	-	Yes	+	modified_base
242002	+	rRNA		OCPFDLNE_00233	16S ribosomal RNA	-	No
242051	+	rRNA		OCPFDLNE_00233	16S ribosomal RNA	-	Yes	-	m4C
242065	+	rRNA		OCPFDLNE_00233	16S ribosomal RNA	-	No
242075	+	rRNA		OCPFDLNE_00233	16S ribosomal RNA	-	Yes	-	modified_base
242106	+	rRNA		OCPFDLNE_00233	16S ribosomal RNA	-	Yes	+	modified_base
242134	+	rRNA		OCPFDLNE_00233	16S ribosomal RNA	-	Yes	-	m4C
242142	+	rRNA		OCPFDLNE_00233	16S ribosomal RNA	-	Yes	-	modified_base
242158	+	rRNA		OCPFDLNE_00233	16S ribosomal RNA	-	Yes	+	modified_base
242196	+	rRNA		OCPFDLNE_00233	16S ribosomal RNA	-	No
242239	+	rRNA		OCPFDLNE_00233	16S ribosomal RNA	-	No
242251	+	rRNA		OCPFDLNE_00233	16S ribosomal RNA	-	No
242293	+	rRNA		OCPFDLNE_00233	16S ribosomal RNA	-	Yes	+	modified_base
242314	+	rRNA		OCPFDLNE_00233	16S ribosomal RNA	-	No
242323	+	rRNA		OCPFDLNE_00233	16S ribosomal RNA	-	No
242336	+	rRNA		OCPFDLNE_00233	16S ribosomal RNA	-	No
242360	+	rRNA		OCPFDLNE_00233	16S ribosomal RNA	-	Yes	-	modified_base
242389	+	rRNA		OCPFDLNE_00233	16S ribosomal RNA	-	No
242400	+	rRNA		OCPFDLNE_00233	16S ribosomal RNA	-	No
242462	+	rRNA		OCPFDLNE_00233	16S ribosomal RNA	-	No
242513	+	rRNA		OCPFDLNE_00233	16S ribosomal RNA	-	No
242549	+	rRNA		OCPFDLNE_00233	16S ribosomal RNA	-	No
242568	+	rRNA		OCPFDLNE_00233	16S ribosomal RNA	-	No
242604	+	rRNA		OCPFDLNE_00233	16S ribosomal RNA	-	Yes	+	modified_base
242683	+	rRNA		OCPFDLNE_00233	16S ribosomal RNA	-	Yes	-	modified_base
242707	+	rRNA		OCPFDLNE_00233	16S ribosomal RNA	-	No
242722	+	rRNA		OCPFDLNE_00233	16S ribosomal RNA	-	No
242771	+	rRNA		OCPFDLNE_00233	16S ribosomal RNA	-	No
242791	+	rRNA		OCPFDLNE_00233	16S ribosomal RNA	-	No
242805	+	rRNA		OCPFDLNE_00233	16S ribosomal RNA	-	Yes	+	modified_base
242824	+	intergenic region	-	-	-	-	Yes	-	modified_base
243091	+	rRNA		OCPFDLNE_00234	23S ribosomal RNA	-	No
243133	+	rRNA		OCPFDLNE_00234	23S ribosomal RNA	-	Yes	+	modified_base
243146	+	rRNA		OCPFDLNE_00234	23S ribosomal RNA	-	Yes	+	modified_base
243204	+	rRNA		OCPFDLNE_00234	23S ribosomal RNA	-	No
243239	+	rRNA		OCPFDLNE_00234	23S ribosomal RNA	-	No
243250	+	rRNA		OCPFDLNE_00234	23S ribosomal RNA	-	No
243269	+	rRNA		OCPFDLNE_00234	23S ribosomal RNA	-	No
243323	+	rRNA		OCPFDLNE_00234	23S ribosomal RNA	-	Yes	+	modified_base
243344	+	rRNA		OCPFDLNE_00234	23S ribosomal RNA	-	Yes	-	modified_base
243360	+	rRNA		OCPFDLNE_00234	23S ribosomal RNA	-	Yes	+	modified_base
243395	+	rRNA		OCPFDLNE_00234	23S ribosomal RNA	-	No
243435	+	rRNA		OCPFDLNE_00234	23S ribosomal RNA	-	No
243450	+	rRNA		OCPFDLNE_00234	23S ribosomal RNA	-	Yes	+	modified_base
243499	+	rRNA		OCPFDLNE_00234	23S ribosomal RNA	-	No
243515	+	rRNA		OCPFDLNE_00234	23S ribosomal RNA	-	No
243566	+	rRNA		OCPFDLNE_00234	23S ribosomal RNA	-	No
243591	+	rRNA		OCPFDLNE_00234	23S ribosomal RNA	-	No
243644	+	rRNA		OCPFDLNE_00234	23S ribosomal RNA	-	No
243680	+	rRNA		OCPFDLNE_00234	23S ribosomal RNA	-	No
243706	+	rRNA		OCPFDLNE_00234	23S ribosomal RNA	-	Yes	-	m4C
243737	+	rRNA		OCPFDLNE_00234	23S ribosomal RNA	-	Yes	+	m4C
243764	+	rRNA		OCPFDLNE_00234	23S ribosomal RNA	-	No
243795	+	rRNA		OCPFDLNE_00234	23S ribosomal RNA	-	No
243812	+	rRNA		OCPFDLNE_00234	23S ribosomal RNA	-	No
243855	+	rRNA		OCPFDLNE_00234	23S ribosomal RNA	-	No
243870	+	rRNA		OCPFDLNE_00234	23S ribosomal RNA	-	Yes	-	modified_base
243947	+	rRNA		OCPFDLNE_00234	23S ribosomal RNA	-	Yes	-	modified_base
243976	+	rRNA		OCPFDLNE_00234	23S ribosomal RNA	-	No
244017	+	rRNA		OCPFDLNE_00234	23S ribosomal RNA	-	No
244049	+	rRNA		OCPFDLNE_00234	23S ribosomal RNA	-	Yes	-	m4C
244070	+	rRNA		OCPFDLNE_00234	23S ribosomal RNA	-	No
244107	+	rRNA		OCPFDLNE_00234	23S ribosomal RNA	-	No
244168	+	rRNA		OCPFDLNE_00234	23S ribosomal RNA	-	No
244177	+	rRNA		OCPFDLNE_00234	23S ribosomal RNA	-	No
244199	+	rRNA		OCPFDLNE_00234	23S ribosomal RNA	-	Yes	+	modified_base
244237	+	rRNA		OCPFDLNE_00234	23S ribosomal RNA	-	No
244273	+	rRNA		OCPFDLNE_00234	23S ribosomal RNA	-	Yes	-	modified_base
244288	+	rRNA		OCPFDLNE_00234	23S ribosomal RNA	-	Yes	+	modified_base
244305	+	rRNA		OCPFDLNE_00234	23S ribosomal RNA	-	Yes	-	modified_base
244322	+	rRNA		OCPFDLNE_00234	23S ribosomal RNA	-	No
244332	+	rRNA		OCPFDLNE_00234	23S ribosomal RNA	-	Yes	-	m4C
244345	+	rRNA		OCPFDLNE_00234	23S ribosomal RNA	-	No
244353	+	rRNA		OCPFDLNE_00234	23S ribosomal RNA	-	Yes	+	modified_base
244378	+	rRNA		OCPFDLNE_00234	23S ribosomal RNA	-	Yes	+	m4C
244389	+	rRNA		OCPFDLNE_00234	23S ribosomal RNA	-	Yes	+	modified_base
244473	+	rRNA		OCPFDLNE_00234	23S ribosomal RNA	-	No
244485	+	rRNA		OCPFDLNE_00234	23S ribosomal RNA	-	No
244495	+	rRNA		OCPFDLNE_00234	23S ribosomal RNA	-	Yes	-	modified_base
244513	+	rRNA		OCPFDLNE_00234	23S ribosomal RNA	-	No
244532	+	rRNA		OCPFDLNE_00234	23S ribosomal RNA	-	No
244550	+	rRNA		OCPFDLNE_00234	23S ribosomal RNA	-	No
244577	+	rRNA		OCPFDLNE_00234	23S ribosomal RNA	-	Yes	-	modified_base
244599	+	rRNA		OCPFDLNE_00234	23S ribosomal RNA	-	No
244627	+	rRNA		OCPFDLNE_00234	23S ribosomal RNA	-	No
244636	+	rRNA		OCPFDLNE_00234	23S ribosomal RNA	-	Yes	-	modified_base
244657	+	rRNA		OCPFDLNE_00234	23S ribosomal RNA	-	No
244684	+	rRNA		OCPFDLNE_00234	23S ribosomal RNA	-	No
244699	+	rRNA		OCPFDLNE_00234	23S ribosomal RNA	-	Yes	+	modified_base
244737	+	rRNA		OCPFDLNE_00234	23S ribosomal RNA	-	Yes	+	modified_base
244748	+	rRNA		OCPFDLNE_00234	23S ribosomal RNA	-	No
244758	+	rRNA		OCPFDLNE_00234	23S ribosomal RNA	-	Yes	-	modified_base
244831	+	rRNA		OCPFDLNE_00234	23S ribosomal RNA	-	Yes	+	modified_base
244926	+	rRNA		OCPFDLNE_00234	23S ribosomal RNA	-	Yes	+	m4C
244955	+	rRNA		OCPFDLNE_00234	23S ribosomal RNA	-	No
244992	+	rRNA		OCPFDLNE_00234	23S ribosomal RNA	-	No
245005	+	rRNA		OCPFDLNE_00234	23S ribosomal RNA	-	No
245015	+	rRNA		OCPFDLNE_00234	23S ribosomal RNA	-	Yes	-	modified_base
245048	+	rRNA		OCPFDLNE_00234	23S ribosomal RNA	-	No
245065	+	rRNA		OCPFDLNE_00234	23S ribosomal RNA	-	No
245076	+	rRNA		OCPFDLNE_00234	23S ribosomal RNA	-	Yes	+	modified_base
245131	+	rRNA		OCPFDLNE_00234	23S ribosomal RNA	-	Yes	+	modified_base
245152	+	rRNA		OCPFDLNE_00234	23S ribosomal RNA	-	No
245181	+	rRNA		OCPFDLNE_00234	23S ribosomal RNA	-	No
245209	+	rRNA		OCPFDLNE_00234	23S ribosomal RNA	-	Yes	-	modified_base
245253	+	rRNA		OCPFDLNE_00234	23S ribosomal RNA	-	No
245266	+	rRNA		OCPFDLNE_00234	23S ribosomal RNA	-	No
245304	+	rRNA		OCPFDLNE_00234	23S ribosomal RNA	-	No
245319	+	rRNA		OCPFDLNE_00234	23S ribosomal RNA	-	No
245332	+	rRNA		OCPFDLNE_00234	23S ribosomal RNA	-	Yes	+	modified_base
245368	+	rRNA		OCPFDLNE_00234	23S ribosomal RNA	-	No
245470	+	rRNA		OCPFDLNE_00234	23S ribosomal RNA	-	Yes	-	modified_base
245506	+	rRNA		OCPFDLNE_00234	23S ribosomal RNA	-	Yes	-	modified_base
245524	+	rRNA		OCPFDLNE_00234	23S ribosomal RNA	-	Yes	+	modified_base
245533	+	rRNA		OCPFDLNE_00234	23S ribosomal RNA	-	No
245544	+	rRNA		OCPFDLNE_00234	23S ribosomal RNA	-	No
245578	+	rRNA		OCPFDLNE_00234	23S ribosomal RNA	-	No
245586	+	rRNA		OCPFDLNE_00234	23S ribosomal RNA	-	Yes	+	modified_base
245600	+	rRNA		OCPFDLNE_00234	23S ribosomal RNA	-	No
245632	+	rRNA		OCPFDLNE_00234	23S ribosomal RNA	-	Yes	-	m4C
245666	+	rRNA		OCPFDLNE_00234	23S ribosomal RNA	-	Yes	-	modified_base
245687	+	rRNA		OCPFDLNE_00234	23S ribosomal RNA	-	Yes	-	modified_base
245695	+	rRNA		OCPFDLNE_00234	23S ribosomal RNA	-	No
245731	+	rRNA		OCPFDLNE_00234	23S ribosomal RNA	-	No
245768	+	rRNA		OCPFDLNE_00234	23S ribosomal RNA	-	Yes	+	modified_base
245802	+	rRNA		OCPFDLNE_00234	23S ribosomal RNA	-	No
245843	+	rRNA		OCPFDLNE_00234	23S ribosomal RNA	-	Yes	+	modified_base
245860	+	rRNA		OCPFDLNE_00234	23S ribosomal RNA	-	No
245871	+	rRNA		OCPFDLNE_00234	23S ribosomal RNA	-	No
245879	+	rRNA		OCPFDLNE_00234	23S ribosomal RNA	-	No
245895	+	rRNA		OCPFDLNE_00234	23S ribosomal RNA	-	Yes	-	m4C
245904	+	rRNA		OCPFDLNE_00234	23S ribosomal RNA	-	No
245917	+	rRNA		OCPFDLNE_00234	23S ribosomal RNA	-	Yes	+	modified_base
245928	+	rRNA		OCPFDLNE_00234	23S ribosomal RNA	-	Yes	+	modified_base
245939	+	rRNA		OCPFDLNE_00234	23S ribosomal RNA	-	No
245950	+	rRNA		OCPFDLNE_00234	23S ribosomal RNA	-	No
245962	+	rRNA		OCPFDLNE_00234	23S ribosomal RNA	-	Yes	+	m4C
245996	+	intergenic region	-	-	-	-	No
246148	+	rRNA		OCPFDLNE_00235	5S ribosomal RNA	-	No
247381	+	rRNA		OCPFDLNE_00245	16S ribosomal RNA	-	No
247395	+	rRNA		OCPFDLNE_00245	16S ribosomal RNA	-	No
247403	+	rRNA		OCPFDLNE_00245	16S ribosomal RNA	-	No
247428	+	rRNA		OCPFDLNE_00245	16S ribosomal RNA	-	No
247436	+	rRNA		OCPFDLNE_00245	16S ribosomal RNA	-	No
247466	+	rRNA		OCPFDLNE_00245	16S ribosomal RNA	-	No
247501	+	rRNA		OCPFDLNE_00245	16S ribosomal RNA	-	No
247524	+	rRNA		OCPFDLNE_00245	16S ribosomal RNA	-	No
247557	+	rRNA		OCPFDLNE_00245	16S ribosomal RNA	-	No
247600	+	rRNA		OCPFDLNE_00245	16S ribosomal RNA	-	No
247632	+	rRNA		OCPFDLNE_00245	16S ribosomal RNA	-	No
247643	+	rRNA		OCPFDLNE_00245	16S ribosomal RNA	-	Yes	-	m4C
247676	+	rRNA		OCPFDLNE_00245	16S ribosomal RNA	-	No
247709	+	rRNA		OCPFDLNE_00245	16S ribosomal RNA	-	No
247726	+	rRNA		OCPFDLNE_00245	16S ribosomal RNA	-	No
247741	+	rRNA		OCPFDLNE_00245	16S ribosomal RNA	-	Yes	+	modified_base
247759	+	rRNA		OCPFDLNE_00245	16S ribosomal RNA	-	No
247813	+	rRNA		OCPFDLNE_00245	16S ribosomal RNA	-	No
247821	+	rRNA		OCPFDLNE_00245	16S ribosomal RNA	-	Yes	+	m4C
247893	+	rRNA		OCPFDLNE_00245	16S ribosomal RNA	-	Yes	-	m4C
247903	+	rRNA		OCPFDLNE_00245	16S ribosomal RNA	-	No
247911	+	rRNA		OCPFDLNE_00245	16S ribosomal RNA	-	No
247922	+	rRNA		OCPFDLNE_00245	16S ribosomal RNA	-	Yes	+	modified_base
247957	+	rRNA		OCPFDLNE_00245	16S ribosomal RNA	-	Yes	+	modified_base
247989	+	rRNA		OCPFDLNE_00245	16S ribosomal RNA	-	Yes	+	modified_base
247998	+	rRNA		OCPFDLNE_00245	16S ribosomal RNA	-	No
248006	+	rRNA		OCPFDLNE_00245	16S ribosomal RNA	-	Yes	+	modified_base
248023	+	rRNA		OCPFDLNE_00245	16S ribosomal RNA	-	Yes	+	modified_base
248072	+	rRNA		OCPFDLNE_00245	16S ribosomal RNA	-	Yes	-	m4C
248086	+	rRNA		OCPFDLNE_00245	16S ribosomal RNA	-	No
248096	+	rRNA		OCPFDLNE_00245	16S ribosomal RNA	-	Yes	-	modified_base
248127	+	rRNA		OCPFDLNE_00245	16S ribosomal RNA	-	Yes	+	modified_base
248155	+	rRNA		OCPFDLNE_00245	16S ribosomal RNA	-	Yes	-	m4C
248163	+	rRNA		OCPFDLNE_00245	16S ribosomal RNA	-	Yes	+	modified_base
248179	+	rRNA		OCPFDLNE_00245	16S ribosomal RNA	-	Yes	-	modified_base
248260	+	rRNA		OCPFDLNE_00245	16S ribosomal RNA	-	No
248272	+	rRNA		OCPFDLNE_00245	16S ribosomal RNA	-	No
248314	+	rRNA		OCPFDLNE_00245	16S ribosomal RNA	-	Yes	+	modified_base
248335	+	rRNA		OCPFDLNE_00245	16S ribosomal RNA	-	No
248344	+	rRNA		OCPFDLNE_00245	16S ribosomal RNA	-	No
248357	+	rRNA		OCPFDLNE_00245	16S ribosomal RNA	-	No
248380	+	rRNA		OCPFDLNE_00245	16S ribosomal RNA	-	Yes	+	modified_base
248410	+	rRNA		OCPFDLNE_00245	16S ribosomal RNA	-	No
248421	+	rRNA		OCPFDLNE_00245	16S ribosomal RNA	-	No
248483	+	rRNA		OCPFDLNE_00245	16S ribosomal RNA	-	No
248534	+	rRNA		OCPFDLNE_00245	16S ribosomal RNA	-	No
248570	+	rRNA		OCPFDLNE_00245	16S ribosomal RNA	-	No
248589	+	rRNA		OCPFDLNE_00245	16S ribosomal RNA	-	No
248625	+	rRNA		OCPFDLNE_00245	16S ribosomal RNA	-	Yes	+	modified_base
248704	+	rRNA		OCPFDLNE_00245	16S ribosomal RNA	-	Yes	-	modified_base
248728	+	rRNA		OCPFDLNE_00245	16S ribosomal RNA	-	No
248743	+	rRNA		OCPFDLNE_00245	16S ribosomal RNA	-	No
248792	+	rRNA		OCPFDLNE_00245	16S ribosomal RNA	-	No
248812	+	rRNA		OCPFDLNE_00245	16S ribosomal RNA	-	No
248826	+	rRNA		OCPFDLNE_00245	16S ribosomal RNA	-	Yes	+	modified_base
249112	+	rRNA		OCPFDLNE_00246	23S ribosomal RNA	-	No
249154	+	rRNA		OCPFDLNE_00246	23S ribosomal RNA	-	Yes	+	modified_base
249167	+	rRNA		OCPFDLNE_00246	23S ribosomal RNA	-	Yes	+	modified_base
249226	+	rRNA		OCPFDLNE_00246	23S ribosomal RNA	-	No
249258	+	rRNA		OCPFDLNE_00246	23S ribosomal RNA	-	Yes	-	modified_base
249266	+	rRNA		OCPFDLNE_00246	23S ribosomal RNA	-	Yes	-	modified_base
249290	+	rRNA		OCPFDLNE_00246	23S ribosomal RNA	-	No
249344	+	rRNA		OCPFDLNE_00246	23S ribosomal RNA	-	Yes	-	modified_base
249365	+	rRNA		OCPFDLNE_00246	23S ribosomal RNA	-	No
249381	+	rRNA		OCPFDLNE_00246	23S ribosomal RNA	-	Yes	+	modified_base
249416	+	rRNA		OCPFDLNE_00246	23S ribosomal RNA	-	No
249455	+	rRNA		OCPFDLNE_00246	23S ribosomal RNA	-	No
249471	+	rRNA		OCPFDLNE_00246	23S ribosomal RNA	-	Yes	+	modified_base
249522	+	rRNA		OCPFDLNE_00246	23S ribosomal RNA	-	No
249536	+	rRNA		OCPFDLNE_00246	23S ribosomal RNA	-	No
249612	+	rRNA		OCPFDLNE_00246	23S ribosomal RNA	-	No
249663	+	rRNA		OCPFDLNE_00246	23S ribosomal RNA	-	No
249701	+	rRNA		OCPFDLNE_00246	23S ribosomal RNA	-	No
249727	+	rRNA		OCPFDLNE_00246	23S ribosomal RNA	-	Yes	-	m4C
249737	+	rRNA		OCPFDLNE_00246	23S ribosomal RNA	-	No
249785	+	rRNA		OCPFDLNE_00246	23S ribosomal RNA	-	No
249816	+	rRNA		OCPFDLNE_00246	23S ribosomal RNA	-	No
249833	+	rRNA		OCPFDLNE_00246	23S ribosomal RNA	-	No
249876	+	rRNA		OCPFDLNE_00246	23S ribosomal RNA	-	Yes	+	modified_base
249891	+	rRNA		OCPFDLNE_00246	23S ribosomal RNA	-	Yes	-	modified_base
249968	+	rRNA		OCPFDLNE_00246	23S ribosomal RNA	-	Yes	+	m4C
249997	+	rRNA		OCPFDLNE_00246	23S ribosomal RNA	-	No
250038	+	rRNA		OCPFDLNE_00246	23S ribosomal RNA	-	No
250071	+	rRNA		OCPFDLNE_00246	23S ribosomal RNA	-	No
250091	+	rRNA		OCPFDLNE_00246	23S ribosomal RNA	-	No
250118	+	rRNA		OCPFDLNE_00246	23S ribosomal RNA	-	No
250128	+	rRNA		OCPFDLNE_00246	23S ribosomal RNA	-	No
250189	+	rRNA		OCPFDLNE_00246	23S ribosomal RNA	-	No
250198	+	rRNA		OCPFDLNE_00246	23S ribosomal RNA	-	No
250220	+	rRNA		OCPFDLNE_00246	23S ribosomal RNA	-	Yes	+	modified_base
250258	+	rRNA		OCPFDLNE_00246	23S ribosomal RNA	-	No
250294	+	rRNA		OCPFDLNE_00246	23S ribosomal RNA	-	No
250306	+	rRNA		OCPFDLNE_00246	23S ribosomal RNA	-	No
250326	+	rRNA		OCPFDLNE_00246	23S ribosomal RNA	-	No
250352	+	rRNA		OCPFDLNE_00246	23S ribosomal RNA	-	No
250366	+	rRNA		OCPFDLNE_00246	23S ribosomal RNA	-	No
250374	+	rRNA		OCPFDLNE_00246	23S ribosomal RNA	-	Yes	+	modified_base
250399	+	rRNA		OCPFDLNE_00246	23S ribosomal RNA	-	Yes	+	m4C
250410	+	rRNA		OCPFDLNE_00246	23S ribosomal RNA	-	No
250494	+	rRNA		OCPFDLNE_00246	23S ribosomal RNA	-	Yes	+	modified_base
250506	+	rRNA		OCPFDLNE_00246	23S ribosomal RNA	-	No
250516	+	rRNA		OCPFDLNE_00246	23S ribosomal RNA	-	Yes	-	modified_base
250534	+	rRNA		OCPFDLNE_00246	23S ribosomal RNA	-	No
250553	+	rRNA		OCPFDLNE_00246	23S ribosomal RNA	-	No
250571	+	rRNA		OCPFDLNE_00246	23S ribosomal RNA	-	No
250598	+	rRNA		OCPFDLNE_00246	23S ribosomal RNA	-	Yes	-	modified_base
250620	+	rRNA		OCPFDLNE_00246	23S ribosomal RNA	-	No
250648	+	rRNA		OCPFDLNE_00246	23S ribosomal RNA	-	No
250657	+	rRNA		OCPFDLNE_00246	23S ribosomal RNA	-	Yes	-	modified_base
250678	+	rRNA		OCPFDLNE_00246	23S ribosomal RNA	-	No
250705	+	rRNA		OCPFDLNE_00246	23S ribosomal RNA	-	No
250720	+	rRNA		OCPFDLNE_00246	23S ribosomal RNA	-	Yes	+	modified_base
250757	+	rRNA		OCPFDLNE_00246	23S ribosomal RNA	-	No
250769	+	rRNA		OCPFDLNE_00246	23S ribosomal RNA	-	No
250779	+	rRNA		OCPFDLNE_00246	23S ribosomal RNA	-	No
250852	+	rRNA		OCPFDLNE_00246	23S ribosomal RNA	-	Yes	+	modified_base
250884	+	rRNA		OCPFDLNE_00246	23S ribosomal RNA	-	No
250947	+	rRNA		OCPFDLNE_00246	23S ribosomal RNA	-	Yes	+	m4C
250976	+	rRNA		OCPFDLNE_00246	23S ribosomal RNA	-	No
251013	+	rRNA		OCPFDLNE_00246	23S ribosomal RNA	-	No
251026	+	rRNA		OCPFDLNE_00246	23S ribosomal RNA	-	No
251036	+	rRNA		OCPFDLNE_00246	23S ribosomal RNA	-	Yes	-	modified_base
251069	+	rRNA		OCPFDLNE_00246	23S ribosomal RNA	-	No
251086	+	rRNA		OCPFDLNE_00246	23S ribosomal RNA	-	No
251097	+	rRNA		OCPFDLNE_00246	23S ribosomal RNA	-	Yes	+	modified_base
251152	+	rRNA		OCPFDLNE_00246	23S ribosomal RNA	-	Yes	+	modified_base
251173	+	rRNA		OCPFDLNE_00246	23S ribosomal RNA	-	No
251202	+	rRNA		OCPFDLNE_00246	23S ribosomal RNA	-	No
251230	+	rRNA		OCPFDLNE_00246	23S ribosomal RNA	-	Yes	-	modified_base
251274	+	rRNA		OCPFDLNE_00246	23S ribosomal RNA	-	No
251287	+	rRNA		OCPFDLNE_00246	23S ribosomal RNA	-	No
251325	+	rRNA		OCPFDLNE_00246	23S ribosomal RNA	-	No
251340	+	rRNA		OCPFDLNE_00246	23S ribosomal RNA	-	No
251358	+	rRNA		OCPFDLNE_00246	23S ribosomal RNA	-	No
251389	+	rRNA		OCPFDLNE_00246	23S ribosomal RNA	-	No
251441	+	rRNA		OCPFDLNE_00246	23S ribosomal RNA	-	No
251491	+	rRNA		OCPFDLNE_00246	23S ribosomal RNA	-	Yes	+	m4C
251527	+	rRNA		OCPFDLNE_00246	23S ribosomal RNA	-	No
251545	+	rRNA		OCPFDLNE_00246	23S ribosomal RNA	-	Yes	+	modified_base
251554	+	rRNA		OCPFDLNE_00246	23S ribosomal RNA	-	No
251565	+	rRNA		OCPFDLNE_00246	23S ribosomal RNA	-	No
251599	+	rRNA		OCPFDLNE_00246	23S ribosomal RNA	-	No
251607	+	rRNA		OCPFDLNE_00246	23S ribosomal RNA	-	Yes	+	modified_base
251621	+	rRNA		OCPFDLNE_00246	23S ribosomal RNA	-	No
251653	+	rRNA		OCPFDLNE_00246	23S ribosomal RNA	-	No
251687	+	rRNA		OCPFDLNE_00246	23S ribosomal RNA	-	Yes	+	modified_base
251708	+	rRNA		OCPFDLNE_00246	23S ribosomal RNA	-	Yes	+	modified_base
251716	+	rRNA		OCPFDLNE_00246	23S ribosomal RNA	-	No
251752	+	rRNA		OCPFDLNE_00246	23S ribosomal RNA	-	No
251789	+	rRNA		OCPFDLNE_00246	23S ribosomal RNA	-	No
251823	+	rRNA		OCPFDLNE_00246	23S ribosomal RNA	-	Yes	-	modified_base
251864	+	rRNA		OCPFDLNE_00246	23S ribosomal RNA	-	Yes	-	m4C
251881	+	rRNA		OCPFDLNE_00246	23S ribosomal RNA	-	Yes	-	modified_base
251892	+	rRNA		OCPFDLNE_00246	23S ribosomal RNA	-	No
251916	+	rRNA		OCPFDLNE_00246	23S ribosomal RNA	-	Yes	-	modified_base
251925	+	rRNA		OCPFDLNE_00246	23S ribosomal RNA	-	No
251938	+	rRNA		OCPFDLNE_00246	23S ribosomal RNA	-	Yes	+	modified_base
251949	+	rRNA		OCPFDLNE_00246	23S ribosomal RNA	-	Yes	+	modified_base
251960	+	rRNA		OCPFDLNE_00246	23S ribosomal RNA	-	No
251971	+	rRNA		OCPFDLNE_00246	23S ribosomal RNA	-	No
251983	+	rRNA		OCPFDLNE_00246	23S ribosomal RNA	-	Yes	+	m4C
252017	+	intergenic region	-	-	-	-	No
252112	+	rRNA		OCPFDLNE_00247	5S ribosomal RNA	-	No
252152	+	rRNA		OCPFDLNE_00247	5S ribosomal RNA	-	No
252169	+	rRNA		OCPFDLNE_00247	5S ribosomal RNA	-	No
252177	+	rRNA		OCPFDLNE_00247	5S ribosomal RNA	-	No
252523	+	CDS	CAB3278349.1	OCPFDLNE_00248	Transcriptional regulator CtsR	ctsr	Yes	+	modified_base
268852	+	CDS	CAB3278367.1	OCPFDLNE_00266	50S ribosomal protein L11	rplK	No
269014	+	CDS	CAB3278367.1	OCPFDLNE_00266	50S ribosomal protein L11	rplK	No
269086	+	CDS	CAB3278367.1	OCPFDLNE_00266	50S ribosomal protein L11	rplK	No
269144	+	CDS	CAB3278367.1	OCPFDLNE_00266	50S ribosomal protein L11	rplK	Yes	+	m4C
269302	+	CDS	CAB3278368.1	OCPFDLNE_00267	Ribosomal protein (Fragment)	rplA	Yes	+	modified_base
269311	+	CDS	CAB3278368.1	OCPFDLNE_00267	Ribosomal protein (Fragment)	rplA	No
269322	+	CDS	CAB3278368.1	OCPFDLNE_00267	Ribosomal protein (Fragment)	rplA	No
269364	+	CDS	CAB3278368.1	OCPFDLNE_00267	Ribosomal protein (Fragment)	rplA	No
269549	+	CDS	CAB3278368.1	OCPFDLNE_00267	Ribosomal protein (Fragment)	rplA	Yes	-	modified_base
269597	+	CDS	CAB3278368.1	OCPFDLNE_00267	Ribosomal protein (Fragment)	rplA	No
269725	+	CDS	CAB3278368.1	OCPFDLNE_00267	Ribosomal protein (Fragment)	rplA	No
282078	+	intergenic region	-	-	-	-	Yes	+	modified_base
282192	+	CDS	CAB3278380.1	OCPFDLNE_00279	DNA-directed RNA polymerase subunit beta	rpoB	No
282289	+	CDS	CAB3278380.1	OCPFDLNE_00279	DNA-directed RNA polymerase subunit beta	rpoB	No
298979	+	CDS	CAB3278388.1	OCPFDLNE_00287	ArgE/DapE family deacylase	dapE	No
299009	+	CDS	CAB3278388.1	OCPFDLNE_00287	ArgE/DapE family deacylase	dapE	Yes	-	modified_base
299017	+	CDS	CAB3278388.1	OCPFDLNE_00287	ArgE/DapE family deacylase	dapE	Yes	+	modified_base
299055	+	CDS	CAB3278388.1	OCPFDLNE_00287	ArgE/DapE family deacylase	dapE	No
299077	+	CDS	CAB3278388.1	OCPFDLNE_00287	ArgE/DapE family deacylase	dapE	Yes	+	modified_base
299097	+	CDS	CAB3278388.1	OCPFDLNE_00287	ArgE/DapE family deacylase	dapE	Yes	+	modified_base
299130	+	CDS	CAB3278388.1	OCPFDLNE_00287	ArgE/DapE family deacylase	dapE	No
299147	+	CDS	CAB3278388.1	OCPFDLNE_00287	ArgE/DapE family deacylase	dapE	No
299158	+	CDS	CAB3278388.1	OCPFDLNE_00287	ArgE/DapE family deacylase	dapE	Yes	+	modified_base
299209	+	CDS	CAB3278388.1	OCPFDLNE_00287	ArgE/DapE family deacylase	dapE	Yes	-	m4C
299272	+	CDS	CAB3278388.1	OCPFDLNE_00287	ArgE/DapE family deacylase	dapE	No
299291	+	CDS	CAB3278388.1	OCPFDLNE_00287	ArgE/DapE family deacylase	dapE	Yes	-	modified_base
299376	+	CDS	CAB3278388.1	OCPFDLNE_00287	ArgE/DapE family deacylase	dapE	Yes	+	modified_base
299481	+	CDS	CAB3278388.1	OCPFDLNE_00287	ArgE/DapE family deacylase	dapE	No
299489	+	CDS	CAB3278388.1	OCPFDLNE_00287	ArgE/DapE family deacylase	dapE	Yes	-	modified_base
299578	+	CDS	CAB3278388.1	OCPFDLNE_00287	ArgE/DapE family deacylase	dapE	Yes	-	modified_base
299647	+	CDS	CAB3278388.1	OCPFDLNE_00287	ArgE/DapE family deacylase	dapE	Yes	-	modified_base
299782	+	CDS	CAB3278388.1	OCPFDLNE_00287	ArgE/DapE family deacylase	dapE	No
299817	+	CDS	CAB3278388.1	OCPFDLNE_00287	ArgE/DapE family deacylase	dapE	No
299864	+	CDS	CAB3278388.1	OCPFDLNE_00287	ArgE/DapE family deacylase	dapE	No
299907	+	CDS	CAB3278388.1	OCPFDLNE_00287	ArgE/DapE family deacylase	dapE	No
300016	+	CDS	CAB3278388.1	OCPFDLNE_00287	ArgE/DapE family deacylase	dapE	No
300101	+	intergenic region	-	-	-	-	Yes	+	modified_base
307466	+	CDS	CAB3278396.1	CPFDLNE_00295	N-acetyltransferase	-	Yes	+	modified_base
307508	+	CDS	CAB3278396.1	CPFDLNE_00295	N-acetyltransferase	-	Yes	-	modified_base
307527	+	CDS	CAB3278396.1	CPFDLNE_00295	N-acetyltransferase	-	No
321903	+	intergenic region	-	-	-	-	No
322038	+	CDS	CAB3278410.1	OCPFDLNE_00309	PhoP family transcriptional regulator	walR	No
322097	+	CDS	CAB3278410.1	OCPFDLNE_00309	PhoP family transcriptional regulator	walR	No
322121	+	CDS	CAB3278410.1	OCPFDLNE_00309	PhoP family transcriptional regulator	walR	No
322143	+	CDS	CAB3278410.1	OCPFDLNE_00309	PhoP family transcriptional regulator	walR	No
322231	+	CDS	CAB3278410.1	OCPFDLNE_00309	PhoP family transcriptional regulator	walR	Yes	+	modified_base
322274	+	CDS	CAB3278410.1	OCPFDLNE_00309	PhoP family transcriptional regulator	walR	Yes	-	modified_base
322353	+	CDS	CAB3278410.1	OCPFDLNE_00309	PhoP family transcriptional regulator	walR	Yes	+	modified_base
322407	+	CDS	CAB3278410.1	OCPFDLNE_00309	PhoP family transcriptional regulator	walR	No
322596	+	CDS	CAB3278410.1	OCPFDLNE_00309	PhoP family transcriptional regulator	walR	No
322615	+	CDS	CAB3278410.1	OCPFDLNE_00309	PhoP family transcriptional regulator	walR	No
327734	+	CDS	CAB3278414.1	OCPFDLNE_00313	MBL fold metallo-hydrolase	yycJ	No
328470	+	CDS	CAB3278415.1	OCPFDLNE_00314	Sporulation membrane serine protease	htrB	Yes	-	modified_base
328509	+	CDS	CAB3278415.1	OCPFDLNE_00314	Sporulation membrane serine protease	htrB	No
328939	+	CDS	CAB3278415.1	OCPFDLNE_00314	Sporulation membrane serine protease	htrB	No
328956	+	CDS	CAB3278415.1	OCPFDLNE_00314	Sporulation membrane serine protease	htrB	Yes	-	modified_base
329000	+	CDS	CAB3278415.1	OCPFDLNE_00314	Sporulation membrane serine protease	htrB	No
329050	+	CDS	CAB3278415.1	OCPFDLNE_00314	Sporulation membrane serine protease	htrB	Yes	+	modified_base
329076	+	CDS	CAB3278415.1	OCPFDLNE_00314	Sporulation membrane serine protease	htrB	No
385438	-	CDS	CAB3278468.1	OCPFDLNE_00367	D-erythrulose kinase	dhaK-2	Yes	+	modified_base
385451	-	CDS	CAB3278468.1	OCPFDLNE_00367	D-erythrulose kinase	dhaK-2	Yes	+	modified_base
385561	-	CDS	CAB3278468.1	OCPFDLNE_00367	D-erythrulose kinase	dhaK-2	No
386868	-	CDS	CAB3278470.1	CPFDLNE_00369	Putative glycerol transporter	-	No
386947	-	CDS	CAB3278470.1	CPFDLNE_00369	Putative glycerol transporter	-	Yes	-	modified_base
386975	-	CDS	CAB3278470.1	CPFDLNE_00369	Putative glycerol transporter	-	No
387037	-	CDS	CAB3278470.1	CPFDLNE_00369	Putative glycerol transporter	-	No
387110	-	CDS	CAB3278470.1	CPFDLNE_00369	Putative glycerol transporter	-	Yes	-	modified_base
387150	-	CDS	CAB3278470.1	CPFDLNE_00369	Putative glycerol transporter	-	Yes	-	modified_base
387195	-	CDS	CAB3278470.1	CPFDLNE_00369	Putative glycerol transporter	-	No
390891	+	intergenic region	-	-	-	-	Yes	+	modified_base
390986	+	CDS	CAB3278475.1	OCPFDLNE_00374	Fumarate reductase flavoprotein subunit	ifcA	No
391012	+	CDS	CAB3278475.1	OCPFDLNE_00374	Fumarate reductase flavoprotein subunit	ifcA	No
391028	+	CDS	CAB3278475.1	OCPFDLNE_00374	Fumarate reductase flavoprotein subunit	ifcA	No
391061	+	CDS	CAB3278475.1	OCPFDLNE_00374	Fumarate reductase flavoprotein subunit	ifcA	No
391106	+	CDS	CAB3278475.1	OCPFDLNE_00374	Fumarate reductase flavoprotein subunit	ifcA	No
391203	+	CDS	CAB3278475.1	OCPFDLNE_00374	Fumarate reductase flavoprotein subunit	ifcA	No
391253	+	CDS	CAB3278475.1	OCPFDLNE_00374	Fumarate reductase flavoprotein subunit	ifcA	No
391321	+	CDS	CAB3278475.1	OCPFDLNE_00374	Fumarate reductase flavoprotein subunit	ifcA	Yes	+	modified_base
391340	+	CDS	CAB3278475.1	OCPFDLNE_00374	Fumarate reductase flavoprotein subunit	ifcA	No
391377	+	CDS	CAB3278475.1	OCPFDLNE_00374	Fumarate reductase flavoprotein subunit	ifcA	No
391530	+	CDS	CAB3278475.1	OCPFDLNE_00374	Fumarate reductase flavoprotein subunit	ifcA	No
391563	+	CDS	CAB3278475.1	OCPFDLNE_00374	Fumarate reductase flavoprotein subunit	ifcA	Yes	+	modified_base
391581	+	CDS	CAB3278475.1	OCPFDLNE_00374	Fumarate reductase flavoprotein subunit	ifcA	No
391626	+	CDS	CAB3278475.1	OCPFDLNE_00374	Fumarate reductase flavoprotein subunit	ifcA	No
422215	+	intergenic region	-	-	-	-	Yes	-	modified_base
422226	+	intergenic region	-	-	-	-	No
422240	+	CDS	CAB3278510.1	CPFDLNE_00409	hypothetical protein	-	Yes	+	modified_base
422260	+	CDS	CAB3278510.1	CPFDLNE_00409	hypothetical protein	-	No
422311	+	CDS	CAB3278510.1	CPFDLNE_00409	hypothetical protein	-	No
422346	+	CDS	CAB3278510.1	CPFDLNE_00409	hypothetical protein	-	Yes	-	m4C
422402	+	CDS	CAB3278510.1	CPFDLNE_00409	hypothetical protein	-	No
422419	+	CDS	CAB3278510.1	CPFDLNE_00409	hypothetical protein	-	Yes	+	m6A
422458	+	CDS	CAB3278510.1	CPFDLNE_00409	hypothetical protein	-	Yes	-	modified_base
422478	+	CDS	CAB3278510.1	CPFDLNE_00409	hypothetical protein	-	Yes	-	modified_base
422565	+	CDS	CAB3278511.1	CPFDLNE_00410	hypothetical protein	-	No
422617	+	CDS	CAB3278511.1	CPFDLNE_00410	hypothetical protein	-	No
422727	+	CDS	CAB3278511.1	CPFDLNE_00410	hypothetical protein	-	No
422751	+	CDS	CAB3278511.1	CPFDLNE_00410	hypothetical protein	-	No
422780	+	CDS	CAB3278511.1	CPFDLNE_00410	hypothetical protein	-	No
422789	+	CDS	CAB3278511.1	CPFDLNE_00410	hypothetical protein	-	No
422805	+	CDS	CAB3278511.1	CPFDLNE_00410	hypothetical protein	-	No
422842	+	CDS	CAB3278511.1	CPFDLNE_00410	hypothetical protein	-	No
422881	+	CDS	CAB3278511.1	CPFDLNE_00410	hypothetical protein	-	No
422898	+	CDS	CAB3278511.1	CPFDLNE_00410	hypothetical protein	-	No
422968	+	CDS	CAB3278511.1	CPFDLNE_00410	hypothetical protein	-	Yes	+	modified_base
423105	+	CDS	CAB3278511.1	CPFDLNE_00410	hypothetical protein	-	No
423134	+	CDS	CAB3278511.1	CPFDLNE_00410	hypothetical protein	-	Yes	-	modified_base
423161	+	CDS	CAB3278511.1	CPFDLNE_00410	hypothetical protein	-	No
423199	+	CDS	CAB3278511.1	CPFDLNE_00410	hypothetical protein	-	Yes	+	modified_base
423242	+	CDS	CAB3278511.1	CPFDLNE_00410	hypothetical protein	-	No
423354	+	CDS	CAB3278511.1	CPFDLNE_00410	hypothetical protein	-	No
423383	+	CDS	CAB3278511.1	CPFDLNE_00410	hypothetical protein	-	No
423405	+	CDS	CAB3278511.1	CPFDLNE_00410	hypothetical protein	-	Yes	+	modified_base
423435	+	CDS	CAB3278511.1	CPFDLNE_00410	hypothetical protein	-	No
423448	+	CDS	CAB3278511.1	CPFDLNE_00410	hypothetical protein	-	Yes	-	modified_base
423470	+	CDS	CAB3278511.1	CPFDLNE_00410	hypothetical protein	-	No
423544	+	CDS	CAB3278512.1	CPFDLNE_00411	hypothetical protein	-	No
423609	+	CDS	CAB3278512.1	CPFDLNE_00411	hypothetical protein	-	Yes	-	m4C
423623	+	CDS	CAB3278512.1	CPFDLNE_00411	hypothetical protein	-	Yes	+	modified_base
423667	+	CDS	CAB3278512.1	CPFDLNE_00411	hypothetical protein	-	No
423678	+	CDS	CAB3278512.1	CPFDLNE_00411	hypothetical protein	-	No
423716	+	CDS	CAB3278512.1	CPFDLNE_00411	hypothetical protein	-	No
423774	+	CDS	CAB3278512.1	CPFDLNE_00411	hypothetical protein	-	No
444780	+	intergenic region	-	-	-	-	Yes	+	modified_base
444800	+	CDS	CAB3278533.1	OCPFDLNE_00432	Peptidoglycan-N-acetylglucosamine deacetylase	pgdA	No
444889	+	CDS	CAB3278533.1	OCPFDLNE_00432	Peptidoglycan-N-acetylglucosamine deacetylase	pgdA	No
444922	+	CDS	CAB3278533.1	OCPFDLNE_00432	Peptidoglycan-N-acetylglucosamine deacetylase	pgdA	No
444967	+	CDS	CAB3278533.1	OCPFDLNE_00432	Peptidoglycan-N-acetylglucosamine deacetylase	pgdA	Yes	+	modified_base
445022	+	CDS	CAB3278533.1	OCPFDLNE_00432	Peptidoglycan-N-acetylglucosamine deacetylase	pgdA	No
445053	+	CDS	CAB3278533.1	OCPFDLNE_00432	Peptidoglycan-N-acetylglucosamine deacetylase	pgdA	Yes	-	modified_base
445062	+	CDS	CAB3278533.1	OCPFDLNE_00432	Peptidoglycan-N-acetylglucosamine deacetylase	pgdA	Yes	-	modified_base
445139	+	CDS	CAB3278533.1	OCPFDLNE_00432	Peptidoglycan-N-acetylglucosamine deacetylase	pgdA	No
445168	+	CDS	CAB3278533.1	OCPFDLNE_00432	Peptidoglycan-N-acetylglucosamine deacetylase	pgdA	Yes	-	modified_base
445281	+	CDS	CAB3278533.1	OCPFDLNE_00432	Peptidoglycan-N-acetylglucosamine deacetylase	pgdA	Yes	-	m4C
445299	+	CDS	CAB3278533.1	OCPFDLNE_00432	Peptidoglycan-N-acetylglucosamine deacetylase	pgdA	No
445376	+	CDS	CAB3278533.1	OCPFDLNE_00432	Peptidoglycan-N-acetylglucosamine deacetylase	pgdA	No
445384	+	CDS	CAB3278533.1	OCPFDLNE_00432	Peptidoglycan-N-acetylglucosamine deacetylase	pgdA	Yes	+	modified_base
461460	+	intergenic region	-	-	-	-	No
461523	+	intergenic region	-	-	-	-	No
461633	+	intergenic region	-	-	-	-	No
461690	+	intergenic region	-	-	-	-	No
461749	+	intergenic region	-	-	-	-	Yes	+	modified_base
461779	+	intergenic region	-	-	-	-	No
461791	+	intergenic region	-	-	-	-	Yes	-	m4C
461811	+	intergenic region	-	-	-	-	No
461840	+	intergenic region	-	-	-	-	No
461885	+	CDS	CAB3278551.1	OCPFDLNE_00450	Truncated internalin A	inlA_7	No
461956	+	CDS	CAB3278551.1	OCPFDLNE_00450	Truncated internalin A	inlA_7	No
461976	+	CDS	CAB3278551.1	OCPFDLNE_00450	Truncated internalin A	inlA_7	No
462008	+	CDS	CAB3278551.1	OCPFDLNE_00450	Truncated internalin A	inlA_7	No
462029	+	CDS	CAB3278551.1	OCPFDLNE_00450	Truncated internalin A	inlA_7	No
462053	+	CDS	CAB3278551.1	OCPFDLNE_00450	Truncated internalin A	inlA_7	Yes	+	modified_base
462085	+	CDS	CAB3278551.1	OCPFDLNE_00450	Truncated internalin A	inlA_7	Yes	-	modified_base
462108	+	CDS	CAB3278551.1	OCPFDLNE_00450	Truncated internalin A	inlA_7	No
462191	+	CDS	CAB3278551.1	OCPFDLNE_00450	Truncated internalin A	inlA_7	Yes	-	modified_base
462233	+	CDS	CAB3278551.1	OCPFDLNE_00450	Truncated internalin A	inlA_7	Yes	+	modified_base
462256	+	CDS	CAB3278551.1	OCPFDLNE_00450	Truncated internalin A	inlA_7	No
462314	+	CDS	CAB3278551.1	OCPFDLNE_00450	Truncated internalin A	inlA_7	No
462322	+	CDS	CAB3278551.1	OCPFDLNE_00450	Truncated internalin A	inlA_7	No
462374	+	CDS	CAB3278551.1	OCPFDLNE_00450	Truncated internalin A	inlA_7	No
462449	+	CDS	CAB3278551.1	OCPFDLNE_00450	Truncated internalin A	inlA_7	Yes	+	modified_base
462525	+	CDS	CAB3278551.1	OCPFDLNE_00450	Truncated internalin A	inlA_7	No
462549	+	CDS	CAB3278551.1	OCPFDLNE_00450	Truncated internalin A	inlA_7	No
462584	+	CDS	CAB3278551.1	OCPFDLNE_00450	Truncated internalin A	inlA_7	No
462619	+	CDS	CAB3278551.1	OCPFDLNE_00450	Truncated internalin A	inlA_7	Yes	-	m4C
462655	+	CDS	CAB3278551.1	OCPFDLNE_00450	Truncated internalin A	inlA_7	Yes	+	modified_base
462684	+	CDS	CAB3278551.1	OCPFDLNE_00450	Truncated internalin A	inlA_7	Yes	-	modified_base
462712	+	CDS	CAB3278551.1	OCPFDLNE_00450	Truncated internalin A	inlA_7	No
462778	+	CDS	CAB3278551.1	OCPFDLNE_00450	Truncated internalin A	inlA_7	No
462830	+	CDS	CAB3278551.1	OCPFDLNE_00450	Truncated internalin A	inlA_7	No
462915	+	CDS	CAB3278551.1	OCPFDLNE_00450	Truncated internalin A	inlA_7	No
462924	+	CDS	CAB3278551.1	OCPFDLNE_00450	Truncated internalin A	inlA_7	No
462982	+	CDS	CAB3278551.1	OCPFDLNE_00450	Truncated internalin A	inlA_7	Yes	-	m4C
463028	+	CDS	CAB3278551.1	OCPFDLNE_00450	Truncated internalin A	inlA_7	No
463094	+	CDS	CAB3278551.1	OCPFDLNE_00450	Truncated internalin A	inlA_7	No
463111	+	CDS	CAB3278551.1	OCPFDLNE_00450	Truncated internalin A	inlA_7	No
463119	+	CDS	CAB3278551.1	OCPFDLNE_00450	Truncated internalin A	inlA_7	No
463151	+	CDS	CAB3278551.1	OCPFDLNE_00450	Truncated internalin A	inlA_7	No
463188	+	CDS	CAB3278551.1	OCPFDLNE_00450	Truncated internalin A	inlA_7	Yes	+	m6A
463207	+	CDS	CAB3278551.1	OCPFDLNE_00450	Truncated internalin A	inlA_7	No
463227	+	CDS	CAB3278551.1	OCPFDLNE_00450	Truncated internalin A	inlA_7	No
463262	+	CDS	CAB3278551.1	OCPFDLNE_00450	Truncated internalin A	inlA_7	No
463329	+	CDS	CAB3278551.1	OCPFDLNE_00450	Truncated internalin A	inlA_7	No
463359	+	CDS	CAB3278551.1	OCPFDLNE_00450	Truncated internalin A	inlA_7	No
463371	+	CDS	CAB3278551.1	OCPFDLNE_00450	Truncated internalin A	inlA_7	No
463396	+	CDS	CAB3278551.1	OCPFDLNE_00450	Truncated internalin A	inlA_7	No
463438	+	CDS	CAB3278551.1	OCPFDLNE_00450	Truncated internalin A	inlA_7	Yes	+	modified_base
463467	+	CDS	CAB3278551.1	OCPFDLNE_00450	Truncated internalin A	inlA_7	Yes	+	modified_base
463509	+	CDS	CAB3278551.1	OCPFDLNE_00450	Truncated internalin A	inlA_7	No
463574	+	CDS	CAB3278551.1	OCPFDLNE_00450	Truncated internalin A	inlA_7	No
463605	+	CDS	CAB3278551.1	OCPFDLNE_00450	Truncated internalin A	inlA_7	No
463625	+	CDS	CAB3278551.1	OCPFDLNE_00450	Truncated internalin A	inlA_7	No
463676	+	CDS	CAB3278551.1	OCPFDLNE_00450	Truncated internalin A	inlA_7	No
463719	+	CDS	CAB3278551.1	OCPFDLNE_00450	Truncated internalin A	inlA_7	No
463751	+	CDS	CAB3278551.1	OCPFDLNE_00450	Truncated internalin A	inlA_7	No
463854	+	CDS	CAB3278551.1	OCPFDLNE_00450	Truncated internalin A	inlA_7	No
463864	+	CDS	CAB3278551.1	OCPFDLNE_00450	Truncated internalin A	inlA_7	No
463886	+	CDS	CAB3278551.1	OCPFDLNE_00450	Truncated internalin A	inlA_7	No
463895	+	CDS	CAB3278551.1	OCPFDLNE_00450	Truncated internalin A	inlA_7	Yes	-	modified_base
463927	+	CDS	CAB3278551.1	OCPFDLNE_00450	Truncated internalin A	inlA_7	No
463938	+	CDS	CAB3278551.1	OCPFDLNE_00450	Truncated internalin A	inlA_7	No
463953	+	CDS	CAB3278551.1	OCPFDLNE_00450	Truncated internalin A	inlA_7	No
463997	+	CDS	CAB3278551.1	OCPFDLNE_00450	Truncated internalin A	inlA_7	Yes	-	m4C
464053	+	CDS	CAB3278551.1	OCPFDLNE_00450	Truncated internalin A	inlA_7	No
464097	+	CDS	CAB3278551.1	OCPFDLNE_00450	Truncated internalin A	inlA_7	No
464116	+	CDS	CAB3278551.1	OCPFDLNE_00450	Truncated internalin A	inlA_7	Yes	-	modified_base
464146	+	CDS	CAB3278551.1	OCPFDLNE_00450	Truncated internalin A	inlA_7	Yes	+	modified_base
464201	+	CDS	CAB3278551.1	OCPFDLNE_00450	Truncated internalin A	inlA_7	Yes	+	modified_base
464212	+	CDS	CAB3278551.1	OCPFDLNE_00450	Truncated internalin A	inlA_7	Yes	-	modified_base
464238	+	CDS	CAB3278551.1	OCPFDLNE_00450	Truncated internalin A	inlA_7	No
464262	+	intergenic region	-	-	-	-	Yes	+	modified_base
464279	+	intergenic region	-	-	-	-	Yes	-	modified_base
464548	+	CDS	CAB3278552.1	OCPFDLNE_00451	Internalin B	inlB_1	No
464843	+	CDS	CAB3278552.1	OCPFDLNE_00451	Internalin B	inlB_1	No
464876	+	CDS	CAB3278552.1	OCPFDLNE_00451	Internalin B	inlB_1	Yes	-	modified_base
465041	+	CDS	CAB3278552.1	OCPFDLNE_00451	Internalin B	inlB_1	No
465164	+	CDS	CAB3278552.1	OCPFDLNE_00451	Internalin B	inlB_1	No
465244	+	CDS	CAB3278552.1	OCPFDLNE_00451	Internalin B	inlB_1	No
465285	+	CDS	CAB3278552.1	OCPFDLNE_00451	Internalin B	inlB_1	No
465330	+	CDS	CAB3278552.1	OCPFDLNE_00451	Internalin B	inlB_1	No
496326	+	intergenic region	-	-	-	-	No
496497	+	CDS	CAB3278577.1	CPFDLNE_00476	hypothetical protein	-	No
496640	+	CDS	CAB3278577.1	CPFDLNE_00476	hypothetical protein	-	Yes	+	modified_base
496713	+	CDS	CAB3278577.1	CPFDLNE_00476	hypothetical protein	-	No
496722	+	CDS	CAB3278577.1	CPFDLNE_00476	hypothetical protein	-	No
496737	+	CDS	CAB3278577.1	CPFDLNE_00476	hypothetical protein	-	No
496753	+	CDS	CAB3278577.1	CPFDLNE_00476	hypothetical protein	-	No
496781	+	CDS	CAB3278577.1	CPFDLNE_00476	hypothetical protein	-	Yes	-	modified_base
496829	+	CDS	CAB3278577.1	CPFDLNE_00476	hypothetical protein	-	No
496841	+	CDS	CAB3278577.1	CPFDLNE_00476	hypothetical protein	-	Yes	-	modified_base
496857	+	CDS	CAB3278577.1	CPFDLNE_00476	hypothetical protein	-	No
496865	+	CDS	CAB3278577.1	CPFDLNE_00476	hypothetical protein	-	No
497083	+	CDS	CAB3278577.1	CPFDLNE_00476	hypothetical protein	-	No
497117	+	CDS	CAB3278577.1	CPFDLNE_00476	hypothetical protein	-	No
497149	+	CDS	CAB3278577.1	CPFDLNE_00476	hypothetical protein	-	No
497205	+	intergenic region	-	-	-	-	No
497274	+	CDS	CAB3278578.1	CPFDLNE_00477	hypothetical protein	-	No
497292	+	CDS	CAB3278578.1	CPFDLNE_00477	hypothetical protein	-	Yes	+	modified_base
497365	+	CDS	CAB3278578.1	CPFDLNE_00477	hypothetical protein	-	No
497375	+	CDS	CAB3278578.1	CPFDLNE_00477	hypothetical protein	-	No
532160	+	CDS	CAB3278615.1	CPFDLNE_00514	Universal stress protein UspA	-	No
532190	+	CDS	CAB3278615.1	CPFDLNE_00514	Universal stress protein UspA	-	No
532222	+	CDS	CAB3278615.1	CPFDLNE_00514	Universal stress protein UspA	-	Yes	-	modified_base
532298	+	CDS	CAB3278615.1	CPFDLNE_00514	Universal stress protein UspA	-	No
532342	+	CDS	CAB3278615.1	CPFDLNE_00514	Universal stress protein UspA	-	No
532356	+	CDS	CAB3278615.1	CPFDLNE_00514	Universal stress protein UspA	-	No
532471	+	CDS	CAB3278615.1	CPFDLNE_00514	Universal stress protein UspA	-	No
532483	+	CDS	CAB3278615.1	CPFDLNE_00514	Universal stress protein UspA	-	Yes	+	modified_base
532553	+	CDS	CAB3278615.1	CPFDLNE_00514	Universal stress protein UspA	-	Yes	+	modified_base
572905	-	CDS	CAB3278647.1	OCPFDLNE_00546	Tagatose-bisphosphate aldolase	lacD	Yes	-	modified_base
572924	-	CDS	CAB3278647.1	OCPFDLNE_00546	Tagatose-bisphosphate aldolase	lacD	No
572932	-	CDS	CAB3278647.1	OCPFDLNE_00546	Tagatose-bisphosphate aldolase	lacD	No
572948	-	CDS	CAB3278647.1	OCPFDLNE_00546	Tagatose-bisphosphate aldolase	lacD	No
572957	-	CDS	CAB3278647.1	OCPFDLNE_00546	Tagatose-bisphosphate aldolase	lacD	No
573031	-	CDS	CAB3278647.1	OCPFDLNE_00546	Tagatose-bisphosphate aldolase	lacD	No
573069	-	CDS	CAB3278647.1	OCPFDLNE_00546	Tagatose-bisphosphate aldolase	lacD	No
573077	-	CDS	CAB3278647.1	OCPFDLNE_00546	Tagatose-bisphosphate aldolase	lacD	Yes	-	modified_base
573151	-	CDS	CAB3278647.1	OCPFDLNE_00546	Tagatose-bisphosphate aldolase	lacD	Yes	-	modified_base
573178	-	CDS	CAB3278647.1	OCPFDLNE_00546	Tagatose-bisphosphate aldolase	lacD	No
573197	-	CDS	CAB3278647.1	OCPFDLNE_00546	Tagatose-bisphosphate aldolase	lacD	No
573270	-	CDS	CAB3278647.1	OCPFDLNE_00546	Tagatose-bisphosphate aldolase	lacD	No
573292	-	CDS	CAB3278647.1	OCPFDLNE_00546	Tagatose-bisphosphate aldolase	lacD	Yes	-	modified_base
573308	-	CDS	CAB3278647.1	OCPFDLNE_00546	Tagatose-bisphosphate aldolase	lacD	No
573330	-	intergenic region	-	-	-	-	No
573342	-	intergenic region	-	-	-	-	No
573520	+	intergenic region	-	-	-	-	Yes	+	modified_base
573653	+	CDS	CAB3278648.1	OCPFDLNE_00547	Serine-type D-Ala-D-Ala carboxypeptidase	pbpX	No
573667	+	CDS	CAB3278648.1	OCPFDLNE_00547	Serine-type D-Ala-D-Ala carboxypeptidase	pbpX	Yes	+	modified_base
573708	+	CDS	CAB3278648.1	OCPFDLNE_00547	Serine-type D-Ala-D-Ala carboxypeptidase	pbpX	No
573791	+	CDS	CAB3278648.1	OCPFDLNE_00547	Serine-type D-Ala-D-Ala carboxypeptidase	pbpX	No
573927	+	CDS	CAB3278648.1	OCPFDLNE_00547	Serine-type D-Ala-D-Ala carboxypeptidase	pbpX	No
574013	+	CDS	CAB3278648.1	OCPFDLNE_00547	Serine-type D-Ala-D-Ala carboxypeptidase	pbpX	Yes	+	modified_base
574084	+	CDS	CAB3278648.1	OCPFDLNE_00547	Serine-type D-Ala-D-Ala carboxypeptidase	pbpX	No
574130	+	CDS	CAB3278648.1	OCPFDLNE_00547	Serine-type D-Ala-D-Ala carboxypeptidase	pbpX	Yes	-	modified_base
574158	+	CDS	CAB3278648.1	OCPFDLNE_00547	Serine-type D-Ala-D-Ala carboxypeptidase	pbpX	No
574269	+	CDS	CAB3278648.1	OCPFDLNE_00547	Serine-type D-Ala-D-Ala carboxypeptidase	pbpX	No
586302	-	CDS	CAB3278661.1	CPFDLNE_00560	Predicted signal-transduction protein containing cAMP-binding and CBS domains	-	Yes	-	m4C
586412	-	CDS	CAB3278661.1	CPFDLNE_00560	Predicted signal-transduction protein containing cAMP-binding and CBS domains	-	Yes	-	modified_base
586515	-	CDS	CAB3278661.1	CPFDLNE_00560	Predicted signal-transduction protein containing cAMP-binding and CBS domains	-	No
586600	-	CDS	CAB3278661.1	CPFDLNE_00560	Predicted signal-transduction protein containing cAMP-binding and CBS domains	-	No
586715	-	CDS	CAB3278661.1	CPFDLNE_00560	Predicted signal-transduction protein containing cAMP-binding and CBS domains	-	No
586728	-	intergenic region	-	-	-	-	Yes	-	modified_base
614336	-	CDS	CAB3278690.1	OCPFDLNE_00589	Invasion associated secreted endopeptidase	iap_2	Yes	-	modified_base
614605	-	CDS	CAB3278690.1	OCPFDLNE_00589	Invasion associated secreted endopeptidase	iap_2	No
614717	-	CDS	CAB3278690.1	OCPFDLNE_00589	Invasion associated secreted endopeptidase	iap_2	No
614775	-	CDS	CAB3278690.1	OCPFDLNE_00589	Invasion associated secreted endopeptidase	iap_2	Yes	+	m4C
614854	-	CDS	CAB3278690.1	OCPFDLNE_00589	Invasion associated secreted endopeptidase	iap_2	Yes	-	m6A
614869	-	CDS	CAB3278690.1	OCPFDLNE_00589	Invasion associated secreted endopeptidase	iap_2	Yes	+	modified_base
614919	-	CDS	CAB3278690.1	OCPFDLNE_00589	Invasion associated secreted endopeptidase	iap_2	No
614930	-	CDS	CAB3278690.1	OCPFDLNE_00589	Invasion associated secreted endopeptidase	iap_2	No
615059	-	intergenic region	-	-	-	-	Yes	-	m6A
618090	+	CDS	CAB3278692.1	CPFDLNE_00591	UPF0118 membrane protein yubA	-	No
618228	+	CDS	CAB3278692.1	CPFDLNE_00591	UPF0118 membrane protein yubA	-	No
618295	+	CDS	CAB3278692.1	CPFDLNE_00591	UPF0118 membrane protein yubA	-	No
618354	+	CDS	CAB3278692.1	CPFDLNE_00591	UPF0118 membrane protein yubA	-	No
618380	+	CDS	CAB3278692.1	CPFDLNE_00591	UPF0118 membrane protein yubA	-	No
618461	+	CDS	CAB3278692.1	CPFDLNE_00591	UPF0118 membrane protein yubA	-	No
618516	+	CDS	CAB3278692.1	CPFDLNE_00591	UPF0118 membrane protein yubA	-	Yes	-	m4C
618578	+	CDS	CAB3278692.1	CPFDLNE_00591	UPF0118 membrane protein yubA	-	No
618670	+	CDS	CAB3278692.1	CPFDLNE_00591	UPF0118 membrane protein yubA	-	Yes	-	m4C
618714	+	CDS	CAB3278692.1	CPFDLNE_00591	UPF0118 membrane protein yubA	-	No
618876	+	CDS	CAB3278692.1	CPFDLNE_00591	UPF0118 membrane protein yubA	-	No
618893	+	CDS	CAB3278692.1	CPFDLNE_00591	UPF0118 membrane protein yubA	-	No
618932	+	CDS	CAB3278692.1	CPFDLNE_00591	UPF0118 membrane protein yubA	-	No
618943	+	CDS	CAB3278692.1	CPFDLNE_00591	UPF0118 membrane protein yubA	-	No
619053	+	CDS	CAB3278692.1	CPFDLNE_00591	UPF0118 membrane protein yubA	-	Yes	+	modified_base
619067	+	CDS	CAB3278692.1	CPFDLNE_00591	UPF0118 membrane protein yubA	-	Yes	+	modified_base
628373	+	CDS	CAB3278700.1	CPFDLNE_00599	Predicted membrane protein	-	Yes	+	modified_base
628410	+	CDS	CAB3278700.1	CPFDLNE_00599	Predicted membrane protein	-	Yes	-	modified_base
632886	+	CDS	CAB3278704.1	CPFDLNE_00603	HdeD family acid-resistance protein (Fragment)	-	Yes	+	modified_base
633142	+	CDS	CAB3278704.1	CPFDLNE_00603	HdeD family acid-resistance protein (Fragment)	-	No
633175	+	CDS	CAB3278704.1	CPFDLNE_00603	HdeD family acid-resistance protein (Fragment)	-	No
633187	+	CDS	CAB3278704.1	CPFDLNE_00603	HdeD family acid-resistance protein (Fragment)	-	No
633253	+	CDS	CAB3278704.1	CPFDLNE_00603	HdeD family acid-resistance protein (Fragment)	-	Yes	-	m4C
633270	+	CDS	CAB3278704.1	CPFDLNE_00603	HdeD family acid-resistance protein (Fragment)	-	No
633349	+	CDS	CAB3278704.1	CPFDLNE_00603	HdeD family acid-resistance protein (Fragment)	-	Yes	+	m6A
636586	+	CDS	CAB3278708.1	CPFDLNE_00607	Transcriptional regulator	-	No
636618	+	CDS	CAB3278708.1	CPFDLNE_00607	Transcriptional regulator	-	Yes	+	modified_base
636667	+	CDS	CAB3278708.1	CPFDLNE_00607	Transcriptional regulator	-	No
636693	+	CDS	CAB3278708.1	CPFDLNE_00607	Transcriptional regulator	-	No
636702	+	CDS	CAB3278708.1	CPFDLNE_00607	Transcriptional regulator	-	No
636785	+	CDS	CAB3278708.1	CPFDLNE_00607	Transcriptional regulator	-	No
637062	+	CDS	CAB3278709.1	CPFDLNE_00608	hypothetical protein	-	No
637102	+	CDS	CAB3278709.1	CPFDLNE_00608	hypothetical protein	-	Yes	-	modified_base
637322	+	CDS	CAB3278709.1	CPFDLNE_00608	hypothetical protein	-	No
637479	+	CDS	CAB3278710.1	CPFDLNE_00609	Cell surface protein	-	Yes	+	modified_base
720006	-	intergenic region	-	-	-	-	No
720290	-	CDS	CAB3278802.1	OCPFDLNE_00702	Magnesium and cobalt transport protein CorA	corA_1	No
720337	-	CDS	CAB3278802.1	OCPFDLNE_00702	Magnesium and cobalt transport protein CorA	corA_1	No
720927	+	CDS	CAB3278802.1	OCPFDLNE_00702	Magnesium and cobalt transport protein CorA	corA_1	No
720980	+	intergenic region	-	-	-	-	No
721202	+	CDS	CAB3278803.1	CPFDLNE_00703	Putative transcription regulators	-	Yes	+	modified_base
721320	+	CDS	CAB3278803.1	CPFDLNE_00703	Putative transcription regulators	-	No
721348	+	CDS	CAB3278803.1	CPFDLNE_00703	Putative transcription regulators	-	Yes	+	modified_base
725740	-	CDS	CAB3278807.1	CPFDLNE_00707	IgA FC receptor	-	Yes	+	modified_base
725801	-	CDS	CAB3278807.1	CPFDLNE_00707	IgA FC receptor	-	No
726767	+	CDS	CAB3278808.1	CPFDLNE_00708	hypothetical protein	-	No
726787	+	CDS	CAB3278808.1	CPFDLNE_00708	hypothetical protein	-	No
726828	+	CDS	CAB3278808.1	CPFDLNE_00708	hypothetical protein	-	Yes	+	modified_base
726886	+	CDS	CAB3278808.1	CPFDLNE_00708	hypothetical protein	-	No
786575	+	intergenic region	-	-	-	-	Yes	-	modified_base
786595	+	CDS	CAB3278881.1	CPFDLNE_00781	hypothetical protein	-	No
786648	+	CDS	CAB3278881.1	CPFDLNE_00781	hypothetical protein	-	No
786664	+	CDS	CAB3278881.1	CPFDLNE_00781	hypothetical protein	-	No
786704	+	CDS	CAB3278881.1	CPFDLNE_00781	hypothetical protein	-	Yes	+	modified_base
786718	+	CDS	CAB3278881.1	CPFDLNE_00781	hypothetical protein	-	No
786767	+	intergenic region	-	-	-	-	Yes	+	modified_base
786785	+	intergenic region	-	-	-	-	No
786802	+	intergenic region	-	-	-	-	No
786811	+	intergenic region	-	-	-	-	Yes	+	modified_base
786862	+	CDS	CAB3278882.1	OCPFDLNE_00782	Glucosamine--fructose-6-phosphate aminotransferase	glmS_2	Yes	+	modified_base
786878	+	CDS	CAB3278882.1	OCPFDLNE_00782	Glucosamine--fructose-6-phosphate aminotransferase	glmS_2	No
786898	+	CDS	CAB3278882.1	OCPFDLNE_00782	Glucosamine--fructose-6-phosphate aminotransferase	glmS_2	No
787199	+	CDS	CAB3278882.1	OCPFDLNE_00782	Glucosamine--fructose-6-phosphate aminotransferase	glmS_2	No
787421	+	CDS	CAB3278882.1	OCPFDLNE_00782	Glucosamine--fructose-6-phosphate aminotransferase	glmS_2	No
787444	+	CDS	CAB3278882.1	OCPFDLNE_00782	Glucosamine--fructose-6-phosphate aminotransferase	glmS_2	No
787492	+	CDS	CAB3278882.1	OCPFDLNE_00782	Glucosamine--fructose-6-phosphate aminotransferase	glmS_2	No
787503	+	CDS	CAB3278882.1	OCPFDLNE_00782	Glucosamine--fructose-6-phosphate aminotransferase	glmS_2	Yes	+	modified_base
787537	+	CDS	CAB3278882.1	OCPFDLNE_00782	Glucosamine--fructose-6-phosphate aminotransferase	glmS_2	No
787552	+	CDS	CAB3278882.1	OCPFDLNE_00782	Glucosamine--fructose-6-phosphate aminotransferase	glmS_2	No
787592	+	CDS	CAB3278882.1	OCPFDLNE_00782	Glucosamine--fructose-6-phosphate aminotransferase	glmS_2	No
787636	+	CDS	CAB3278882.1	OCPFDLNE_00782	Glucosamine--fructose-6-phosphate aminotransferase	glmS_2	No
787782	+	CDS	CAB3278882.1	OCPFDLNE_00782	Glucosamine--fructose-6-phosphate aminotransferase	glmS_2	Yes	+	modified_base
787825	+	CDS	CAB3278882.1	OCPFDLNE_00782	Glucosamine--fructose-6-phosphate aminotransferase	glmS_2	Yes	+	modified_base
787874	+	CDS	CAB3278882.1	OCPFDLNE_00782	Glucosamine--fructose-6-phosphate aminotransferase	glmS_2	No
787942	+	CDS	CAB3278882.1	OCPFDLNE_00782	Glucosamine--fructose-6-phosphate aminotransferase	glmS_2	No
787953	+	CDS	CAB3278882.1	OCPFDLNE_00782	Glucosamine--fructose-6-phosphate aminotransferase	glmS_2	No
788061	+	CDS	CAB3278882.1	OCPFDLNE_00782	Glucosamine--fructose-6-phosphate aminotransferase	glmS_2	Yes	-	m4C
788088	+	CDS	CAB3278882.1	OCPFDLNE_00782	Glucosamine--fructose-6-phosphate aminotransferase	glmS_2	Yes	-	m4C
788223	+	CDS	CAB3278882.1	OCPFDLNE_00782	Glucosamine--fructose-6-phosphate aminotransferase	glmS_2	Yes	-	modified_base
789031	+	CDS	CAB3278883.1	OCPFDLNE_00783	Riboflavin biosynthesis protein RibF	ribF_1	No
789125	+	CDS	CAB3278883.1	OCPFDLNE_00783	Riboflavin biosynthesis protein RibF	ribF_1	Yes	-	m4C
789145	+	CDS	CAB3278883.1	OCPFDLNE_00783	Riboflavin biosynthesis protein RibF	ribF_1	Yes	+	modified_base
789166	+	CDS	CAB3278883.1	OCPFDLNE_00783	Riboflavin biosynthesis protein RibF	ribF_1	No
807555	+	CDS	CAB3278902.1	CPFDLNE_00802	hypothetical protein	-	No
807592	+	CDS	CAB3278903.1	CPFDLNE_00803	hypothetical protein	-	Yes	+	modified_base
830082	+	CDS	CAB3278927.1	OCPFDLNE_00827	Diacylglycerol kinase catalytic subunit	dagK_1	Yes	-	modified_base
830122	+	CDS	CAB3278927.1	OCPFDLNE_00827	Diacylglycerol kinase catalytic subunit	dagK_1	No
830176	+	CDS	CAB3278927.1	OCPFDLNE_00827	Diacylglycerol kinase catalytic subunit	dagK_1	No
830256	+	CDS	CAB3278927.1	OCPFDLNE_00827	Diacylglycerol kinase catalytic subunit	dagK_1	No
830447	+	CDS	CAB3278927.1	OCPFDLNE_00827	Diacylglycerol kinase catalytic subunit	dagK_1	Yes	+	modified_base
830567	+	CDS	CAB3278927.1	OCPFDLNE_00827	Diacylglycerol kinase catalytic subunit	dagK_1	No
830630	+	CDS	CAB3278927.1	OCPFDLNE_00827	Diacylglycerol kinase catalytic subunit	dagK_1	No
830721	+	CDS	CAB3278927.1	OCPFDLNE_00827	Diacylglycerol kinase catalytic subunit	dagK_1	Yes	-	m4C
830767	+	CDS	CAB3278927.1	OCPFDLNE_00827	Diacylglycerol kinase catalytic subunit	dagK_1	No
830779	+	CDS	CAB3278927.1	OCPFDLNE_00827	Diacylglycerol kinase catalytic subunit	dagK_1	No
835893	-	CDS	CAB3278935.1	OCPFDLNE_00835	Mannose-specific phosphotransferasesystem component IIC	manY	Yes	-	modified_base
835922	-	CDS	CAB3278935.1	OCPFDLNE_00835	Mannose-specific phosphotransferasesystem component IIC	manY	Yes	-	modified_base
836864	-	CDS	CAB3278936.1	OCPFDLNE_00836	Sorbose-specific phosphotransferase enzyme IIB component	manX_2	No
836891	-	CDS	CAB3278936.1	OCPFDLNE_00836	Sorbose-specific phosphotransferase enzyme IIB component	manX_2	No
836936	-	CDS	CAB3278936.1	OCPFDLNE_00836	Sorbose-specific phosphotransferase enzyme IIB component	manX_2	Yes	-	modified_base
836960	-	CDS	CAB3278936.1	OCPFDLNE_00836	Sorbose-specific phosphotransferase enzyme IIB component	manX_2	No
836971	-	CDS	CAB3278936.1	OCPFDLNE_00836	Sorbose-specific phosphotransferase enzyme IIB component	manX_2	No
837076	-	CDS	CAB3278936.1	OCPFDLNE_00836	Sorbose-specific phosphotransferase enzyme IIB component	manX_2	Yes	-	modified_base
837219	-	CDS	CAB3278936.1	OCPFDLNE_00836	Sorbose-specific phosphotransferase enzyme IIB component	manX_2	Yes	-	modified_base
837353	-	CDS	CAB3278937.1	OCPFDLNE_00837	PTS system mannose-specific transporter subunit IIA	manX_3	No
837396	-	CDS	CAB3278937.1	OCPFDLNE_00837	PTS system mannose-specific transporter subunit IIA	manX_3	No
837414	-	CDS	CAB3278937.1	OCPFDLNE_00837	PTS system mannose-specific transporter subunit IIA	manX_3	Yes	-	m4C
837453	-	CDS	CAB3278937.1	OCPFDLNE_00837	PTS system mannose-specific transporter subunit IIA	manX_3	No
837779	-	intergenic region	-	-	-	-	Yes	+	modified_base
837805	-	intergenic region	-	-	-	-	No
837915	-	intergenic region	-	-	-	-	Yes	-	modified_base
837946	-	intergenic region	-	-	-	-	No
880548	+	CDS	CAB3278975.1	CPFDLNE_00875	Plasma-membrane calcium-translocating P-type ATPase	-	No
924391	+	CDS	CAB3279005.1	CPFDLNE_00905	hypothetical protein	-	No
924471	+	CDS	CAB3279005.1	CPFDLNE_00905	hypothetical protein	-	No
924733	+	CDS	CAB3279006.1	CPFDLNE_00906	hypothetical protein	-	No
924756	+	CDS	CAB3279006.1	CPFDLNE_00906	hypothetical protein	-	Yes	-	modified_base
924840	+	CDS	CAB3279006.1	CPFDLNE_00906	hypothetical protein	-	No
925183	+	CDS	CAB3279006.1	CPFDLNE_00906	hypothetical protein	-	No
940021	+	intergenic region	-	-	-	-	No
940044	+	intergenic region	-	-	-	-	No
940065	+	intergenic region	-	-	-	-	No
940099	+	intergenic region	-	-	-	-	Yes	+	modified_base
940107	+	intergenic region	-	-	-	-	No
940142	+	intergenic region	-	-	-	-	No
940220	+	intergenic region	-	-	-	-	No
940242	+	intergenic region	-	-	-	-	Yes	-	modified_base
940291	+	CDS	CAB3279021.1	OCPFDLNE_00921	DEAD-box ATP-dependent RNA helicase CshA	cshA	Yes	-	modified_base
940309	+	CDS	CAB3279021.1	OCPFDLNE_00921	DEAD-box ATP-dependent RNA helicase CshA	cshA	No
940319	+	CDS	CAB3279021.1	OCPFDLNE_00921	DEAD-box ATP-dependent RNA helicase CshA	cshA	Yes	-	modified_base
940332	+	CDS	CAB3279021.1	OCPFDLNE_00921	DEAD-box ATP-dependent RNA helicase CshA	cshA	Yes	+	m6A
940372	+	CDS	CAB3279021.1	OCPFDLNE_00921	DEAD-box ATP-dependent RNA helicase CshA	cshA	No
940465	+	CDS	CAB3279021.1	OCPFDLNE_00921	DEAD-box ATP-dependent RNA helicase CshA	cshA	No
940561	+	CDS	CAB3279021.1	OCPFDLNE_00921	DEAD-box ATP-dependent RNA helicase CshA	cshA	No
940648	+	CDS	CAB3279021.1	OCPFDLNE_00921	DEAD-box ATP-dependent RNA helicase CshA	cshA	No
940687	+	CDS	CAB3279021.1	OCPFDLNE_00921	DEAD-box ATP-dependent RNA helicase CshA	cshA	Yes	-	modified_base
940711	+	CDS	CAB3279021.1	OCPFDLNE_00921	DEAD-box ATP-dependent RNA helicase CshA	cshA	No
940724	+	CDS	CAB3279021.1	OCPFDLNE_00921	DEAD-box ATP-dependent RNA helicase CshA	cshA	No
940737	+	CDS	CAB3279021.1	OCPFDLNE_00921	DEAD-box ATP-dependent RNA helicase CshA	cshA	No
940749	+	CDS	CAB3279021.1	OCPFDLNE_00921	DEAD-box ATP-dependent RNA helicase CshA	cshA	No
940773	+	CDS	CAB3279021.1	OCPFDLNE_00921	DEAD-box ATP-dependent RNA helicase CshA	cshA	Yes	+	m6A
940821	+	CDS	CAB3279021.1	OCPFDLNE_00921	DEAD-box ATP-dependent RNA helicase CshA	cshA	No
940926	+	CDS	CAB3279021.1	OCPFDLNE_00921	DEAD-box ATP-dependent RNA helicase CshA	cshA	No
940969	+	CDS	CAB3279021.1	OCPFDLNE_00921	DEAD-box ATP-dependent RNA helicase CshA	cshA	No
941039	+	CDS	CAB3279021.1	OCPFDLNE_00921	DEAD-box ATP-dependent RNA helicase CshA	cshA	No
941063	+	CDS	CAB3279021.1	OCPFDLNE_00921	DEAD-box ATP-dependent RNA helicase CshA	cshA	No
941102	+	CDS	CAB3279021.1	OCPFDLNE_00921	DEAD-box ATP-dependent RNA helicase CshA	cshA	No
941112	+	CDS	CAB3279021.1	OCPFDLNE_00921	DEAD-box ATP-dependent RNA helicase CshA	cshA	Yes	-	m4C
941156	+	CDS	CAB3279021.1	OCPFDLNE_00921	DEAD-box ATP-dependent RNA helicase CshA	cshA	No
941185	+	CDS	CAB3279021.1	OCPFDLNE_00921	DEAD-box ATP-dependent RNA helicase CshA	cshA	Yes	+	m4C
941234	+	CDS	CAB3279021.1	OCPFDLNE_00921	DEAD-box ATP-dependent RNA helicase CshA	cshA	No
941377	+	CDS	CAB3279021.1	OCPFDLNE_00921	DEAD-box ATP-dependent RNA helicase CshA	cshA	Yes	+	m4C
960531	+	CDS	CAB3279042.1	OCPFDLNE_00942	EndoA inhibitor	ndoAI	No
960552	+	CDS	CAB3279042.1	OCPFDLNE_00942	EndoA inhibitor	ndoAI	No
960646	+	CDS	CAB3279042.1	OCPFDLNE_00942	EndoA inhibitor	ndoAI	No
960670	+	CDS	CAB3279042.1	OCPFDLNE_00942	EndoA inhibitor	ndoAI	Yes	-	modified_base
960752	+	CDS	CAB3279042.1	OCPFDLNE_00942	EndoA inhibitor	ndoAI	No
960761	+	CDS	CAB3279042.1	OCPFDLNE_00942	EndoA inhibitor	ndoAI	Yes	+	modified_base
960781	+	CDS	CAB3279042.1	OCPFDLNE_00942	EndoA inhibitor	ndoAI	No
960804	+	CDS	CAB3279042.1	OCPFDLNE_00942	EndoA inhibitor	ndoAI	No
960812	+	intergenic region	-	-	-	-	No
960884	+	CDS	CAB3279043.1	OCPFDLNE_00943	mRNA interferase	ndoA	Yes	-	modified_base
960920	+	CDS	CAB3279043.1	OCPFDLNE_00943	mRNA interferase	ndoA	No
960966	+	CDS	CAB3279043.1	OCPFDLNE_00943	mRNA interferase	ndoA	No
960983	+	CDS	CAB3279043.1	OCPFDLNE_00943	mRNA interferase	ndoA	No
961043	+	CDS	CAB3279043.1	OCPFDLNE_00943	mRNA interferase	ndoA	Yes	-	modified_base
961059	+	CDS	CAB3279043.1	OCPFDLNE_00943	mRNA interferase	ndoA	Yes	-	modified_base
961097	+	CDS	CAB3279043.1	OCPFDLNE_00943	mRNA interferase	ndoA	Yes	-	modified_base
961146	+	CDS	CAB3279043.1	OCPFDLNE_00943	mRNA interferase	ndoA	No
961258	+	intergenic region	-	-	-	-	No
961615	+	CDS	CAB3279044.1	OCPFDLNE_00944	RsbT co-antagonist protein RsbRA	rsbRA	No
961712	+	CDS	CAB3279044.1	OCPFDLNE_00944	RsbT co-antagonist protein RsbRA	rsbRA	No
961738	+	CDS	CAB3279044.1	OCPFDLNE_00944	RsbT co-antagonist protein RsbRA	rsbRA	Yes	+	modified_base
961751	+	CDS	CAB3279044.1	OCPFDLNE_00944	RsbT co-antagonist protein RsbRA	rsbRA	No
961764	+	CDS	CAB3279044.1	OCPFDLNE_00944	RsbT co-antagonist protein RsbRA	rsbRA	No
961861	+	CDS	CAB3279044.1	OCPFDLNE_00944	RsbT co-antagonist protein RsbRA	rsbRA	Yes	-	modified_base
962186	+	CDS	CAB3279044.1	OCPFDLNE_00944	RsbT co-antagonist protein RsbRA	rsbRA	No
962258	+	CDS	CAB3279045.1	OCPFDLNE_00945	RsbT antagonist protein RsbS	rsbS	No
962312	+	CDS	CAB3279045.1	OCPFDLNE_00945	RsbT antagonist protein RsbS	rsbS	No
962392	+	CDS	CAB3279045.1	OCPFDLNE_00945	RsbT antagonist protein RsbS	rsbS	Yes	-	modified_base
962445	+	CDS	CAB3279045.1	OCPFDLNE_00945	RsbT antagonist protein RsbS	rsbS	No
962492	+	CDS	CAB3279045.1	OCPFDLNE_00945	RsbT antagonist protein RsbS	rsbS	No
962776	+	CDS	CAB3279046.1	OCPFDLNE_00946	Anti-sigma B factor RsbT	rsbT	No
962844	+	CDS	CAB3279046.1	OCPFDLNE_00946	Anti-sigma B factor RsbT	rsbT	No
963102	+	CDS	CAB3279047.1	OCPFDLNE_00947	Phosphoserine phosphatase RsbU (Sigma factor sigBregulation protein rsbU)	rsbU	Yes	+	modified_base
963218	+	CDS	CAB3279047.1	OCPFDLNE_00947	Phosphoserine phosphatase RsbU (Sigma factor sigBregulation protein rsbU)	rsbU	No
963244	+	CDS	CAB3279047.1	OCPFDLNE_00947	Phosphoserine phosphatase RsbU (Sigma factor sigBregulation protein rsbU)	rsbU	Yes	-	modified_base
964630	+	CDS	CAB3279049.1	OCPFDLNE_00949	Serine-protein kinase RsbW	rsbW	No
964663	+	CDS	CAB3279049.1	OCPFDLNE_00949	Serine-protein kinase RsbW	rsbW	Yes	+	modified_base
964704	+	CDS	CAB3279049.1	OCPFDLNE_00949	Serine-protein kinase RsbW	rsbW	Yes	-	modified_base
964846	+	CDS	CAB3279049.1	OCPFDLNE_00949	Serine-protein kinase RsbW	rsbW	No
964859	+	CDS	CAB3279049.1	OCPFDLNE_00949	Serine-protein kinase RsbW	rsbW	No
964915	+	CDS	CAB3279049.1	OCPFDLNE_00949	Serine-protein kinase RsbW	rsbW	No
980824	+	CDS	CAB3279066.1	OCPFDLNE_00970	HTH-type transcriptional repressor YtrA	ytrA_2	No
980843	+	CDS	CAB3279066.1	OCPFDLNE_00970	HTH-type transcriptional repressor YtrA	ytrA_2	No
980933	+	CDS	CAB3279066.1	OCPFDLNE_00970	HTH-type transcriptional repressor YtrA	ytrA_2	No
982144	+	intergenic region	-	-	-	-	No
982164	+	intergenic region	-	-	-	-	No
982181	+	CDS	CAB3279068.1	CPFDLNE_00972	Transcription activator	-	No
982312	+	CDS	CAB3279068.1	CPFDLNE_00972	Transcription activator	-	No
983793	+	intergenic region	-	-	-	-	No
983813	+	intergenic region	-	-	-	-	No
983850	+	CDS	CAB3279070.1	CPFDLNE_00974	NAD-dependent succinate-semialdehyde dehydrogenase	-	No
983888	+	CDS	CAB3279070.1	CPFDLNE_00974	NAD-dependent succinate-semialdehyde dehydrogenase	-	Yes	+	modified_base
983913	+	CDS	CAB3279070.1	CPFDLNE_00974	NAD-dependent succinate-semialdehyde dehydrogenase	-	Yes	-	modified_base
983939	+	CDS	CAB3279070.1	CPFDLNE_00974	NAD-dependent succinate-semialdehyde dehydrogenase	-	No
984035	+	CDS	CAB3279070.1	CPFDLNE_00974	NAD-dependent succinate-semialdehyde dehydrogenase	-	Yes	-	modified_base
984082	+	CDS	CAB3279070.1	CPFDLNE_00974	NAD-dependent succinate-semialdehyde dehydrogenase	-	No
984187	+	CDS	CAB3279070.1	CPFDLNE_00974	NAD-dependent succinate-semialdehyde dehydrogenase	-	Yes	+	m4C
984213	+	CDS	CAB3279070.1	CPFDLNE_00974	NAD-dependent succinate-semialdehyde dehydrogenase	-	No
984409	+	CDS	CAB3279070.1	CPFDLNE_00974	NAD-dependent succinate-semialdehyde dehydrogenase	-	Yes	+	modified_base
984417	+	CDS	CAB3279070.1	CPFDLNE_00974	NAD-dependent succinate-semialdehyde dehydrogenase	-	Yes	-	modified_base
984430	+	CDS	CAB3279070.1	CPFDLNE_00974	NAD-dependent succinate-semialdehyde dehydrogenase	-	Yes	-	modified_base
984498	+	CDS	CAB3279070.1	CPFDLNE_00974	NAD-dependent succinate-semialdehyde dehydrogenase	-	No
984529	+	CDS	CAB3279070.1	CPFDLNE_00974	NAD-dependent succinate-semialdehyde dehydrogenase	-	Yes	+	m4C
984564	+	CDS	CAB3279070.1	CPFDLNE_00974	NAD-dependent succinate-semialdehyde dehydrogenase	-	Yes	-	m4C
984624	+	CDS	CAB3279070.1	CPFDLNE_00974	NAD-dependent succinate-semialdehyde dehydrogenase	-	Yes	+	modified_base
984639	+	CDS	CAB3279070.1	CPFDLNE_00974	NAD-dependent succinate-semialdehyde dehydrogenase	-	No
984718	+	CDS	CAB3279070.1	CPFDLNE_00974	NAD-dependent succinate-semialdehyde dehydrogenase	-	Yes	-	modified_base
984793	+	CDS	CAB3279070.1	CPFDLNE_00974	NAD-dependent succinate-semialdehyde dehydrogenase	-	No
984824	+	CDS	CAB3279070.1	CPFDLNE_00974	NAD-dependent succinate-semialdehyde dehydrogenase	-	No
984865	+	CDS	CAB3279070.1	CPFDLNE_00974	NAD-dependent succinate-semialdehyde dehydrogenase	-	Yes	+	modified_base
984873	+	CDS	CAB3279070.1	CPFDLNE_00974	NAD-dependent succinate-semialdehyde dehydrogenase	-	Yes	+	modified_base
984922	+	CDS	CAB3279070.1	CPFDLNE_00974	NAD-dependent succinate-semialdehyde dehydrogenase	-	No
984955	+	CDS	CAB3279070.1	CPFDLNE_00974	NAD-dependent succinate-semialdehyde dehydrogenase	-	Yes	-	modified_base
985004	+	CDS	CAB3279070.1	CPFDLNE_00974	NAD-dependent succinate-semialdehyde dehydrogenase	-	No
985036	+	CDS	CAB3279070.1	CPFDLNE_00974	NAD-dependent succinate-semialdehyde dehydrogenase	-	No
985115	+	CDS	CAB3279070.1	CPFDLNE_00974	NAD-dependent succinate-semialdehyde dehydrogenase	-	No
985150	+	CDS	CAB3279070.1	CPFDLNE_00974	NAD-dependent succinate-semialdehyde dehydrogenase	-	No
985226	+	CDS	CAB3279070.1	CPFDLNE_00974	NAD-dependent succinate-semialdehyde dehydrogenase	-	Yes	+	m4C
985292	+	intergenic region	-	-	-	-	Yes	-	modified_base
994841	+	CDS	CAB3279079.1	OCPFDLNE_00983	Type I pantothenate kinase	coaA	No
994878	+	CDS	CAB3279079.1	OCPFDLNE_00983	Type I pantothenate kinase	coaA	No
994891	+	CDS	CAB3279079.1	OCPFDLNE_00983	Type I pantothenate kinase	coaA	No
995148	+	CDS	CAB3279079.1	OCPFDLNE_00983	Type I pantothenate kinase	coaA	No
999844	-	CDS	CAB3279083.1	OCPFDLNE_00987	Glycerol phosphate lipoteichoic acid synthase	ltaS1	Yes	-	modified_base
1000037	-	CDS	CAB3279083.1	OCPFDLNE_00987	Glycerol phosphate lipoteichoic acid synthase	ltaS1	No
1000118	-	CDS	CAB3279083.1	OCPFDLNE_00987	Glycerol phosphate lipoteichoic acid synthase	ltaS1	No
1000188	-	CDS	CAB3279083.1	OCPFDLNE_00987	Glycerol phosphate lipoteichoic acid synthase	ltaS1	Yes	-	modified_base
1013117	+	intergenic region	-	-	-	-	Yes	+	modified_base
1013147	+	CDS	CAB3279098.1	OCPFDLNE_01003	DNA protection during starvation protein 2	dps	No
1013201	+	CDS	CAB3279098.1	OCPFDLNE_01003	DNA protection during starvation protein 2	dps	No
1013231	+	CDS	CAB3279098.1	OCPFDLNE_01003	DNA protection during starvation protein 2	dps	Yes	+	modified_base
1013271	+	CDS	CAB3279098.1	OCPFDLNE_01003	DNA protection during starvation protein 2	dps	No
1013304	+	CDS	CAB3279098.1	OCPFDLNE_01003	DNA protection during starvation protein 2	dps	Yes	+	modified_base
1013333	+	CDS	CAB3279098.1	OCPFDLNE_01003	DNA protection during starvation protein 2	dps	Yes	+	m4C
1013360	+	CDS	CAB3279098.1	OCPFDLNE_01003	DNA protection during starvation protein 2	dps	No
1013381	+	CDS	CAB3279098.1	OCPFDLNE_01003	DNA protection during starvation protein 2	dps	No
1013414	+	CDS	CAB3279098.1	OCPFDLNE_01003	DNA protection during starvation protein 2	dps	No
1013491	+	CDS	CAB3279098.1	OCPFDLNE_01003	DNA protection during starvation protein 2	dps	No
1013534	+	CDS	CAB3279098.1	OCPFDLNE_01003	DNA protection during starvation protein 2	dps	No
1013562	+	CDS	CAB3279098.1	OCPFDLNE_01003	DNA protection during starvation protein 2	dps	No
1013603	+	intergenic region	-	-	-	-	No
1013876	+	CDS	CAB3279099.1	CPFDLNE_01004	Iron-sulphur cluster biosynthesis	-	No
1013885	+	CDS	CAB3279099.1	CPFDLNE_01004	Iron-sulphur cluster biosynthesis	-	Yes	-	modified_base
1014006	+	CDS	CAB3279099.1	CPFDLNE_01004	Iron-sulphur cluster biosynthesis	-	Yes	+	modified_base
1021233	+	intergenic region	-	-	-	-	No
1021286	+	CDS	CAB3279108.1	CPFDLNE_01013	hypothetical protein	-	No
1021345	+	CDS	CAB3279108.1	CPFDLNE_01013	hypothetical protein	-	Yes	-	modified_base
1021406	+	CDS	CAB3279108.1	CPFDLNE_01013	hypothetical protein	-	Yes	-	modified_base
1021418	+	CDS	CAB3279108.1	CPFDLNE_01013	hypothetical protein	-	No
1021455	+	CDS	CAB3279108.1	CPFDLNE_01013	hypothetical protein	-	Yes	+	modified_base
1021466	+	intergenic region	-	-	-	-	No
1021743	+	CDS	CAB3279109.1	CPFDLNE_01014	hypothetical protein	-	No
1021779	+	CDS	CAB3279109.1	CPFDLNE_01014	hypothetical protein	-	Yes	+	modified_base
1021825	+	CDS	CAB3279109.1	CPFDLNE_01014	hypothetical protein	-	Yes	+	modified_base
1021841	+	CDS	CAB3279109.1	CPFDLNE_01014	hypothetical protein	-	No
1021858	+	CDS	CAB3279109.1	CPFDLNE_01014	hypothetical protein	-	Yes	+	modified_base
1021918	+	CDS	CAB3279109.1	CPFDLNE_01014	hypothetical protein	-	Yes	-	m4C
1021979	+	CDS	CAB3279109.1	CPFDLNE_01014	hypothetical protein	-	No
1022014	+	intergenic region	-	-	-	-	Yes	+	modified_base
1022093	+	CDS	CAB3279110.1	OCPFDLNE_01015	Protein LiaH	liaH	No
1022102	+	CDS	CAB3279110.1	OCPFDLNE_01015	Protein LiaH	liaH	No
1022116	+	CDS	CAB3279110.1	OCPFDLNE_01015	Protein LiaH	liaH	Yes	+	modified_base
1022129	+	CDS	CAB3279110.1	OCPFDLNE_01015	Protein LiaH	liaH	No
1022156	+	CDS	CAB3279110.1	OCPFDLNE_01015	Protein LiaH	liaH	No
1022267	+	CDS	CAB3279110.1	OCPFDLNE_01015	Protein LiaH	liaH	No
1022284	+	CDS	CAB3279110.1	OCPFDLNE_01015	Protein LiaH	liaH	No
1022302	+	CDS	CAB3279110.1	OCPFDLNE_01015	Protein LiaH	liaH	Yes	+	modified_base
1022332	+	CDS	CAB3279110.1	OCPFDLNE_01015	Protein LiaH	liaH	No
1022379	+	CDS	CAB3279110.1	OCPFDLNE_01015	Protein LiaH	liaH	No
1022466	+	CDS	CAB3279110.1	OCPFDLNE_01015	Protein LiaH	liaH	Yes	-	modified_base
1022486	+	CDS	CAB3279110.1	OCPFDLNE_01015	Protein LiaH	liaH	No
1022499	+	CDS	CAB3279110.1	OCPFDLNE_01015	Protein LiaH	liaH	No
1022531	+	CDS	CAB3279110.1	OCPFDLNE_01015	Protein LiaH	liaH	No
1022559	+	CDS	CAB3279110.1	OCPFDLNE_01015	Protein LiaH	liaH	Yes	+	modified_base
1022575	+	CDS	CAB3279110.1	OCPFDLNE_01015	Protein LiaH	liaH	No
1022585	+	CDS	CAB3279110.1	OCPFDLNE_01015	Protein LiaH	liaH	Yes	+	modified_base
1022612	+	CDS	CAB3279110.1	OCPFDLNE_01015	Protein LiaH	liaH	Yes	-	modified_base
1022626	+	CDS	CAB3279110.1	OCPFDLNE_01015	Protein LiaH	liaH	Yes	+	modified_base
1022648	+	CDS	CAB3279110.1	OCPFDLNE_01015	Protein LiaH	liaH	No
1022675	+	CDS	CAB3279110.1	OCPFDLNE_01015	Protein LiaH	liaH	Yes	+	m4C
1022699	+	CDS	CAB3279110.1	OCPFDLNE_01015	Protein LiaH	liaH	No
1022742	+	CDS	CAB3279110.1	OCPFDLNE_01015	Protein LiaH	liaH	No
1022755	+	CDS	CAB3279110.1	OCPFDLNE_01015	Protein LiaH	liaH	Yes	+	modified_base
1022784	+	CDS	CAB3279110.1	OCPFDLNE_01015	Protein LiaH	liaH	No
1022846	+	CDS	CAB3279110.1	OCPFDLNE_01015	Protein LiaH	liaH	No
1029179	+	CDS	CAB3279117.1	OCPFDLNE_01022	Listeria epitope LemA	lemA	No
1029268	+	CDS	CAB3279117.1	OCPFDLNE_01022	Listeria epitope LemA	lemA	No
1029410	+	CDS	CAB3279117.1	OCPFDLNE_01022	Listeria epitope LemA	lemA	No
1030975	-	CDS	CAB3279119.1	CPFDLNE_01024	Predicted dithiol-disulfide isomerase	-	Yes	-	modified_base
1031019	-	CDS	CAB3279119.1	CPFDLNE_01024	Predicted dithiol-disulfide isomerase	-	Yes	+	modified_base
1031146	-	CDS	CAB3279119.1	CPFDLNE_01024	Predicted dithiol-disulfide isomerase	-	Yes	+	m4C
1031193	-	CDS	CAB3279119.1	CPFDLNE_01024	Predicted dithiol-disulfide isomerase	-	No
1031228	-	CDS	CAB3279119.1	CPFDLNE_01024	Predicted dithiol-disulfide isomerase	-	No
1031244	-	CDS	CAB3279119.1	CPFDLNE_01024	Predicted dithiol-disulfide isomerase	-	No
1031280	-	CDS	CAB3279119.1	CPFDLNE_01024	Predicted dithiol-disulfide isomerase	-	No
1031318	-	CDS	CAB3279119.1	CPFDLNE_01024	Predicted dithiol-disulfide isomerase	-	No
1031423	-	CDS	CAB3279119.1	CPFDLNE_01024	Predicted dithiol-disulfide isomerase	-	No
1031449	-	CDS	CAB3279119.1	CPFDLNE_01024	Predicted dithiol-disulfide isomerase	-	Yes	-	modified_base
1031525	-	intergenic region	-	-	-	-	No
1031552	-	intergenic region	-	-	-	-	No
1040415	-	CDS	CAB3279129.1	OCPFDLNE_01034	D-alanine--D-alanyl carrier protein ligase	dltA	No
1040448	-	CDS	CAB3279129.1	OCPFDLNE_01034	D-alanine--D-alanyl carrier protein ligase	dltA	Yes	-	m4C
1040478	-	CDS	CAB3279129.1	OCPFDLNE_01034	D-alanine--D-alanyl carrier protein ligase	dltA	No
1040490	-	CDS	CAB3279129.1	OCPFDLNE_01034	D-alanine--D-alanyl carrier protein ligase	dltA	No
1040598	-	CDS	CAB3279130.1	CPFDLNE_01035	Teichoic acid D-Ala incorporation-associated protein DltX	-	Yes	-	modified_base
1040724	-	intergenic region	-	-	-	-	No
1048000	+	CDS	CAB3279138.1	OCPFDLNE_01043	Aminopeptidase ysdC	ysdC_1	No
1058750	-	CDS	CAB3279150.1	CPFDLNE_01055	hypothetical protein	-	No
1058800	-	CDS	CAB3279150.1	CPFDLNE_01055	hypothetical protein	-	No
1058861	-	CDS	CAB3279150.1	CPFDLNE_01055	hypothetical protein	-	No
1059001	-	CDS	CAB3279150.1	CPFDLNE_01055	hypothetical protein	-	No
1066827	+	intergenic region	-	-	-	-	Yes	-	modified_base
1066907	+	CDS	CAB3279158.1	OCPFDLNE_01063	PTS HPr component phosphorylation site	ptsH	No
1066915	+	CDS	CAB3279158.1	OCPFDLNE_01063	PTS HPr component phosphorylation site	ptsH	No
1066953	+	CDS	CAB3279158.1	OCPFDLNE_01063	PTS HPr component phosphorylation site	ptsH	No
1066965	+	CDS	CAB3279158.1	OCPFDLNE_01063	PTS HPr component phosphorylation site	ptsH	No
1067009	+	CDS	CAB3279158.1	OCPFDLNE_01063	PTS HPr component phosphorylation site	ptsH	No
1067081	+	CDS	CAB3279158.1	OCPFDLNE_01063	PTS HPr component phosphorylation site	ptsH	No
1067124	+	CDS	CAB3279158.1	OCPFDLNE_01063	PTS HPr component phosphorylation site	ptsH	No
1067261	+	CDS	CAB3279159.1	OCPFDLNE_01064	Phosphoenolpyruvate--protein phosphotransferase	ptsI	No
1067272	+	CDS	CAB3279159.1	OCPFDLNE_01064	Phosphoenolpyruvate--protein phosphotransferase	ptsI	No
1067331	+	CDS	CAB3279159.1	OCPFDLNE_01064	Phosphoenolpyruvate--protein phosphotransferase	ptsI	No
1067354	+	CDS	CAB3279159.1	OCPFDLNE_01064	Phosphoenolpyruvate--protein phosphotransferase	ptsI	Yes	-	modified_base
1067376	+	CDS	CAB3279159.1	OCPFDLNE_01064	Phosphoenolpyruvate--protein phosphotransferase	ptsI	No
1067396	+	CDS	CAB3279159.1	OCPFDLNE_01064	Phosphoenolpyruvate--protein phosphotransferase	ptsI	No
1067414	+	CDS	CAB3279159.1	OCPFDLNE_01064	Phosphoenolpyruvate--protein phosphotransferase	ptsI	Yes	-	modified_base
1067425	+	CDS	CAB3279159.1	OCPFDLNE_01064	Phosphoenolpyruvate--protein phosphotransferase	ptsI	No
1067615	+	CDS	CAB3279159.1	OCPFDLNE_01064	Phosphoenolpyruvate--protein phosphotransferase	ptsI	Yes	+	modified_base
1067698	+	CDS	CAB3279159.1	OCPFDLNE_01064	Phosphoenolpyruvate--protein phosphotransferase	ptsI	Yes	-	m4C
1067712	+	CDS	CAB3279159.1	OCPFDLNE_01064	Phosphoenolpyruvate--protein phosphotransferase	ptsI	Yes	-	m4C
1067748	+	CDS	CAB3279159.1	OCPFDLNE_01064	Phosphoenolpyruvate--protein phosphotransferase	ptsI	No
1067823	+	CDS	CAB3279159.1	OCPFDLNE_01064	Phosphoenolpyruvate--protein phosphotransferase	ptsI	No
1084573	+	CDS	CAB3279178.1	OCPFDLNE_01083	Predicted membrane protein	liaF	No
1092274	-	CDS	CAB3279185.1	OCPFDLNE_01090	Ribonuclease J	rnjA	No
1092336	-	CDS	CAB3279186.1	CPFDLNE_01091	Putative transcriptional regulator (Fragment)	-	Yes	-	modified_base
1092392	-	CDS	CAB3279186.1	CPFDLNE_01091	Putative transcriptional regulator (Fragment)	-	No
1092420	-	CDS	CAB3279186.1	CPFDLNE_01091	Putative transcriptional regulator (Fragment)	-	Yes	-	modified_base
1113840	+	intergenic region	-	-	-	-	No
1113871	+	intergenic region	-	-	-	-	No
1113881	+	intergenic region	-	-	-	-	No
1113939	+	intergenic region	-	-	-	-	Yes	+	modified_base
1113947	+	intergenic region	-	-	-	-	No
1113972	+	intergenic region	-	-	-	-	No
1114005	+	intergenic region	-	-	-	-	No
1114084	+	intergenic region	-	-	-	-	No
1114110	+	intergenic region	-	-	-	-	Yes	+	modified_base
1114127	+	intergenic region	-	-	-	-	No
1114144	+	intergenic region	-	-	-	-	No
1114158	+	intergenic region	-	-	-	-	No
1114241	+	CDS	CAB3279210.1	OCPFDLNE_01115	Pyruvate dehydrogenase alpha subunit	pdhA	Yes	-	m4C
1114334	+	CDS	CAB3279210.1	OCPFDLNE_01115	Pyruvate dehydrogenase alpha subunit	pdhA	Yes	-	modified_base
1114346	+	CDS	CAB3279210.1	OCPFDLNE_01115	Pyruvate dehydrogenase alpha subunit	pdhA	No
1114428	+	CDS	CAB3279210.1	OCPFDLNE_01115	Pyruvate dehydrogenase alpha subunit	pdhA	No
1114460	+	CDS	CAB3279210.1	OCPFDLNE_01115	Pyruvate dehydrogenase alpha subunit	pdhA	No
1114476	+	CDS	CAB3279210.1	OCPFDLNE_01115	Pyruvate dehydrogenase alpha subunit	pdhA	Yes	-	modified_base
1114501	+	CDS	CAB3279210.1	OCPFDLNE_01115	Pyruvate dehydrogenase alpha subunit	pdhA	No
1114529	+	CDS	CAB3279210.1	OCPFDLNE_01115	Pyruvate dehydrogenase alpha subunit	pdhA	Yes	+	modified_base
1114596	+	CDS	CAB3279210.1	OCPFDLNE_01115	Pyruvate dehydrogenase alpha subunit	pdhA	Yes	+	modified_base
1114849	+	CDS	CAB3279210.1	OCPFDLNE_01115	Pyruvate dehydrogenase alpha subunit	pdhA	No
1114918	+	CDS	CAB3279210.1	OCPFDLNE_01115	Pyruvate dehydrogenase alpha subunit	pdhA	Yes	-	modified_base
1115045	+	CDS	CAB3279210.1	OCPFDLNE_01115	Pyruvate dehydrogenase alpha subunit	pdhA	No
1115124	+	CDS	CAB3279210.1	OCPFDLNE_01115	Pyruvate dehydrogenase alpha subunit	pdhA	No
1115782	+	CDS	CAB3279211.1	OCPFDLNE_01116	Alpha-ketoacid dehydrogenase subunit beta	pdhB	Yes	-	modified_base
1115871	+	CDS	CAB3279211.1	OCPFDLNE_01116	Alpha-ketoacid dehydrogenase subunit beta	pdhB	No
1115978	+	CDS	CAB3279211.1	OCPFDLNE_01116	Alpha-ketoacid dehydrogenase subunit beta	pdhB	No
1116018	+	CDS	CAB3279211.1	OCPFDLNE_01116	Alpha-ketoacid dehydrogenase subunit beta	pdhB	No
1116400	+	intergenic region	-	-	-	-	Yes	+	modified_base
1116465	+	CDS	CAB3279212.1	OCPFDLNE_01117	Dihydrolipoyllysine-residue acetyltransferase component of pyruvate dehydrogenase complex	pdhC_1	No
1116511	+	CDS	CAB3279212.1	OCPFDLNE_01117	Dihydrolipoyllysine-residue acetyltransferase component of pyruvate dehydrogenase complex	pdhC_1	No
1116527	+	CDS	CAB3279212.1	OCPFDLNE_01117	Dihydrolipoyllysine-residue acetyltransferase component of pyruvate dehydrogenase complex	pdhC_1	No
1116600	+	CDS	CAB3279212.1	OCPFDLNE_01117	Dihydrolipoyllysine-residue acetyltransferase component of pyruvate dehydrogenase complex	pdhC_1	No
1116623	+	CDS	CAB3279212.1	OCPFDLNE_01117	Dihydrolipoyllysine-residue acetyltransferase component of pyruvate dehydrogenase complex	pdhC_1	No
1116651	+	CDS	CAB3279212.1	OCPFDLNE_01117	Dihydrolipoyllysine-residue acetyltransferase component of pyruvate dehydrogenase complex	pdhC_1	No
1116677	+	CDS	CAB3279212.1	OCPFDLNE_01117	Dihydrolipoyllysine-residue acetyltransferase component of pyruvate dehydrogenase complex	pdhC_1	No
1116828	+	CDS	CAB3279212.1	OCPFDLNE_01117	Dihydrolipoyllysine-residue acetyltransferase component of pyruvate dehydrogenase complex	pdhC_1	No
1116837	+	CDS	CAB3279212.1	OCPFDLNE_01117	Dihydrolipoyllysine-residue acetyltransferase component of pyruvate dehydrogenase complex	pdhC_1	No
1116899	+	CDS	CAB3279212.1	OCPFDLNE_01117	Dihydrolipoyllysine-residue acetyltransferase component of pyruvate dehydrogenase complex	pdhC_1	No
1116962	+	CDS	CAB3279212.1	OCPFDLNE_01117	Dihydrolipoyllysine-residue acetyltransferase component of pyruvate dehydrogenase complex	pdhC_1	No
1116988	+	CDS	CAB3279212.1	OCPFDLNE_01117	Dihydrolipoyllysine-residue acetyltransferase component of pyruvate dehydrogenase complex	pdhC_1	Yes	-	modified_base
1117172	+	CDS	CAB3279212.1	OCPFDLNE_01117	Dihydrolipoyllysine-residue acetyltransferase component of pyruvate dehydrogenase complex	pdhC_1	Yes	-	modified_base
1117270	+	CDS	CAB3279212.1	OCPFDLNE_01117	Dihydrolipoyllysine-residue acetyltransferase component of pyruvate dehydrogenase complex	pdhC_1	No
1117582	+	CDS	CAB3279212.1	OCPFDLNE_01117	Dihydrolipoyllysine-residue acetyltransferase component of pyruvate dehydrogenase complex	pdhC_1	No
1117639	+	CDS	CAB3279212.1	OCPFDLNE_01117	Dihydrolipoyllysine-residue acetyltransferase component of pyruvate dehydrogenase complex	pdhC_1	No
1117680	+	CDS	CAB3279212.1	OCPFDLNE_01117	Dihydrolipoyllysine-residue acetyltransferase component of pyruvate dehydrogenase complex	pdhC_1	No
1117708	+	CDS	CAB3279212.1	OCPFDLNE_01117	Dihydrolipoyllysine-residue acetyltransferase component of pyruvate dehydrogenase complex	pdhC_1	Yes	-	modified_base
1120181	+	CDS	CAB3279215.1	OCPFDLNE_01120	L-lactate dehydrogenase	ldh_2	No
1129098	+	intergenic region	-	-	-	-	No
1129173	+	intergenic region	-	-	-	-	No
1129229	+	CDS	CAB3279225.1	OCPFDLNE_01130	Translational GTPase TypA	typA	No
1129275	+	CDS	CAB3279225.1	OCPFDLNE_01130	Translational GTPase TypA	typA	No
1129333	+	CDS	CAB3279225.1	OCPFDLNE_01130	Translational GTPase TypA	typA	No
1129437	+	CDS	CAB3279225.1	OCPFDLNE_01130	Translational GTPase TypA	typA	Yes	-	modified_base
1129469	+	CDS	CAB3279225.1	OCPFDLNE_01130	Translational GTPase TypA	typA	Yes	+	modified_base
1129506	+	CDS	CAB3279225.1	OCPFDLNE_01130	Translational GTPase TypA	typA	No
1129530	+	CDS	CAB3279225.1	OCPFDLNE_01130	Translational GTPase TypA	typA	Yes	+	m6A
1129567	+	CDS	CAB3279225.1	OCPFDLNE_01130	Translational GTPase TypA	typA	No
1129604	+	CDS	CAB3279225.1	OCPFDLNE_01130	Translational GTPase TypA	typA	Yes	+	modified_base
1129614	+	CDS	CAB3279225.1	OCPFDLNE_01130	Translational GTPase TypA	typA	Yes	-	modified_base
1129643	+	CDS	CAB3279225.1	OCPFDLNE_01130	Translational GTPase TypA	typA	No
1129930	+	CDS	CAB3279225.1	OCPFDLNE_01130	Translational GTPase TypA	typA	No
1130056	+	CDS	CAB3279225.1	OCPFDLNE_01130	Translational GTPase TypA	typA	No
1130102	+	CDS	CAB3279225.1	OCPFDLNE_01130	Translational GTPase TypA	typA	Yes	+	modified_base
1131146	+	intergenic region	-	-	-	-	No
1131159	+	intergenic region	-	-	-	-	No
1131177	+	intergenic region	-	-	-	-	No
1131203	+	CDS	CAB3279226.1	CPFDLNE_01131	hypothetical protein	-	Yes	+	modified_base
1131271	+	CDS	CAB3279226.1	CPFDLNE_01131	hypothetical protein	-	No
1131287	+	CDS	CAB3279226.1	CPFDLNE_01131	hypothetical protein	-	No
1131298	+	CDS	CAB3279226.1	CPFDLNE_01131	hypothetical protein	-	No
1131313	+	CDS	CAB3279226.1	CPFDLNE_01131	hypothetical protein	-	No
1131379	+	CDS	CAB3279226.1	CPFDLNE_01131	hypothetical protein	-	Yes	+	modified_base
1131397	+	CDS	CAB3279226.1	CPFDLNE_01131	hypothetical protein	-	No
1131426	+	CDS	CAB3279226.1	CPFDLNE_01131	hypothetical protein	-	No
1131435	+	CDS	CAB3279226.1	CPFDLNE_01131	hypothetical protein	-	Yes	+	modified_base
1131448	+	CDS	CAB3279226.1	CPFDLNE_01131	hypothetical protein	-	No
1131472	+	CDS	CAB3279226.1	CPFDLNE_01131	hypothetical protein	-	Yes	-	modified_base
1131515	+	CDS	CAB3279226.1	CPFDLNE_01131	hypothetical protein	-	No
1131523	+	CDS	CAB3279226.1	CPFDLNE_01131	hypothetical protein	-	No
1131557	+	CDS	CAB3279226.1	CPFDLNE_01131	hypothetical protein	-	Yes	-	m4C
1131595	+	CDS	CAB3279226.1	CPFDLNE_01131	hypothetical protein	-	No
1131668	+	CDS	CAB3279226.1	CPFDLNE_01131	hypothetical protein	-	No
1131679	+	CDS	CAB3279226.1	CPFDLNE_01131	hypothetical protein	-	No
1131731	+	CDS	CAB3279226.1	CPFDLNE_01131	hypothetical protein	-	No
1131766	+	CDS	CAB3279226.1	CPFDLNE_01131	hypothetical protein	-	No
1131856	+	CDS	CAB3279226.1	CPFDLNE_01131	hypothetical protein	-	Yes	-	modified_base
1131890	+	CDS	CAB3279226.1	CPFDLNE_01131	hypothetical protein	-	Yes	-	modified_base
1131929	+	CDS	CAB3279226.1	CPFDLNE_01131	hypothetical protein	-	Yes	+	modified_base
1131953	+	CDS	CAB3279226.1	CPFDLNE_01131	hypothetical protein	-	No
1131969	+	CDS	CAB3279226.1	CPFDLNE_01131	hypothetical protein	-	Yes	+	modified_base
1132017	+	CDS	CAB3279226.1	CPFDLNE_01131	hypothetical protein	-	Yes	+	modified_base
1132495	+	intergenic region	-	-	-	-	No
1132525	+	intergenic region	-	-	-	-	No
1132568	+	CDS	CAB3279228.1	CPFDLNE_01133	hypothetical protein	-	Yes	-	modified_base
1132745	+	CDS	CAB3279228.1	CPFDLNE_01133	hypothetical protein	-	No
1149149	+	CDS	CAB3279238.1	OCPFDLNE_01143	Teichoic acid biosynthesis protein (Fragment)	epsJ_2	No
1149193	+	CDS	CAB3279238.1	OCPFDLNE_01143	Teichoic acid biosynthesis protein (Fragment)	epsJ_2	Yes	+	m4C
1149203	+	CDS	CAB3279238.1	OCPFDLNE_01143	Teichoic acid biosynthesis protein (Fragment)	epsJ_2	No
1149245	+	CDS	CAB3279238.1	OCPFDLNE_01143	Teichoic acid biosynthesis protein (Fragment)	epsJ_2	No
1149375	+	CDS	CAB3279238.1	OCPFDLNE_01143	Teichoic acid biosynthesis protein (Fragment)	epsJ_2	Yes	-	modified_base
1149393	+	CDS	CAB3279238.1	OCPFDLNE_01143	Teichoic acid biosynthesis protein (Fragment)	epsJ_2	No
1149419	+	CDS	CAB3279238.1	OCPFDLNE_01143	Teichoic acid biosynthesis protein (Fragment)	epsJ_2	No
1149481	+	CDS	CAB3279238.1	OCPFDLNE_01143	Teichoic acid biosynthesis protein (Fragment)	epsJ_2	Yes	-	modified_base
1149680	+	CDS	CAB3279238.1	OCPFDLNE_01143	Teichoic acid biosynthesis protein (Fragment)	epsJ_2	No
1151145	+	CDS	CAB3279239.1	OCPFDLNE_01144	Glucose-1-phosphate thymidylyltransferase	rfbA	No
1151202	+	CDS	CAB3279239.1	OCPFDLNE_01144	Glucose-1-phosphate thymidylyltransferase	rfbA	Yes	-	modified_base
1151263	+	CDS	CAB3279239.1	OCPFDLNE_01144	Glucose-1-phosphate thymidylyltransferase	rfbA	No
1151310	+	CDS	CAB3279239.1	OCPFDLNE_01144	Glucose-1-phosphate thymidylyltransferase	rfbA	No
1151338	+	CDS	CAB3279239.1	OCPFDLNE_01144	Glucose-1-phosphate thymidylyltransferase	rfbA	Yes	+	modified_base
1151357	+	CDS	CAB3279239.1	OCPFDLNE_01144	Glucose-1-phosphate thymidylyltransferase	rfbA	No
1156377	+	CDS	CAB3279244.1	OCPFDLNE_01149	Ribitol-5-phosphate cytidylyltransferase	tarI	No
1156441	+	CDS	CAB3279244.1	OCPFDLNE_01149	Ribitol-5-phosphate cytidylyltransferase	tarI	No
1156499	+	CDS	CAB3279244.1	OCPFDLNE_01149	Ribitol-5-phosphate cytidylyltransferase	tarI	Yes	-	modified_base
1156598	+	CDS	CAB3279244.1	OCPFDLNE_01149	Ribitol-5-phosphate cytidylyltransferase	tarI	No
1156643	+	CDS	CAB3279244.1	OCPFDLNE_01149	Ribitol-5-phosphate cytidylyltransferase	tarI	Yes	-	modified_base
1156717	+	CDS	CAB3279244.1	OCPFDLNE_01149	Ribitol-5-phosphate cytidylyltransferase	tarI	No
1156779	+	CDS	CAB3279244.1	OCPFDLNE_01149	Ribitol-5-phosphate cytidylyltransferase	tarI	No
1156803	+	CDS	CAB3279244.1	OCPFDLNE_01149	Ribitol-5-phosphate cytidylyltransferase	tarI	Yes	+	modified_base
1156832	+	CDS	CAB3279244.1	OCPFDLNE_01149	Ribitol-5-phosphate cytidylyltransferase	tarI	No
1156870	+	CDS	CAB3279244.1	OCPFDLNE_01149	Ribitol-5-phosphate cytidylyltransferase	tarI	Yes	-	modified_base
1156893	+	CDS	CAB3279244.1	OCPFDLNE_01149	Ribitol-5-phosphate cytidylyltransferase	tarI	No
1157213	+	CDS	CAB3279245.1	OCPFDLNE_01150	Ribitol-5-phosphate dehydrogenase	tarJ	No
1157302	+	CDS	CAB3279245.1	OCPFDLNE_01150	Ribitol-5-phosphate dehydrogenase	tarJ	No
1157364	+	CDS	CAB3279245.1	OCPFDLNE_01150	Ribitol-5-phosphate dehydrogenase	tarJ	No
1188867	+	CDS	CAB3279282.1	CPFDLNE_01187	Polyhedral organelle shell protein PduT	-	No
1192823	+	intergenic region	-	-	-	-	No
1192875	+	intergenic region	-	-	-	-	No
1193517	+	CDS	CAB3279289.1	OCPFDLNE_01194	Transcriptional regulator PocR	soxS	No
1193556	+	CDS	CAB3279289.1	OCPFDLNE_01194	Transcriptional regulator PocR	soxS	No
1205421	+	CDS	CAB3279304.1	OCPFDLNE_01209	CoA-dependent propionaldehyde dehydrogenase	sucD	No
1205760	+	CDS	CAB3279304.1	OCPFDLNE_01209	CoA-dependent propionaldehyde dehydrogenase	sucD	Yes	-	modified_base
1205791	+	CDS	CAB3279304.1	OCPFDLNE_01209	CoA-dependent propionaldehyde dehydrogenase	sucD	Yes	-	m4C
1205879	+	intergenic region	-	-	-	-	Yes	+	modified_base
1206002	+	CDS	CAB3279305.1	OCPFDLNE_01210	Propanol dehydrogenase PduQ	adhE_1	Yes	+	modified_base
1206039	+	CDS	CAB3279305.1	OCPFDLNE_01210	Propanol dehydrogenase PduQ	adhE_1	No
1206271	+	CDS	CAB3279305.1	OCPFDLNE_01210	Propanol dehydrogenase PduQ	adhE_1	No
1211050	+	intergenic region	-	-	-	-	Yes	-	modified_base
1211059	+	intergenic region	-	-	-	-	No
1211093	+	intergenic region	-	-	-	-	No
1211154	+	intergenic region	-	-	-	-	No
1211226	+	intergenic region	-	-	-	-	Yes	-	modified_base
1211249	+	intergenic region	-	-	-	-	No
1211298	+	intergenic region	-	-	-	-	No
1211321	+	intergenic region	-	-	-	-	Yes	+	modified_base
1214052	+	CDS	CAB3279312.1	OCPFDLNE_01217	Ethanolamine two-component sensor kinase	pdtaS	Yes	+	modified_base
1214282	+	CDS	CAB3279312.1	OCPFDLNE_01217	Ethanolamine two-component sensor kinase	pdtaS	Yes	+	modified_base
1229042	+	CDS	CAB3279329.1	CPFDLNE_01234	ECF transporter S component	-	No
1240370	+	CDS	CAB3279341.1	OCPFDLNE_01246	Sirohydrochlorin cobaltochelatase CbiK	cbiK	No
1240464	+	CDS	CAB3279341.1	OCPFDLNE_01246	Sirohydrochlorin cobaltochelatase CbiK	cbiK	Yes	+	modified_base
1240486	+	CDS	CAB3279342.1	OCPFDLNE_01247	Cobalt-precorrin-2 C-methyltransferase	cbiL	Yes	-	modified_base
1240494	+	CDS	CAB3279342.1	OCPFDLNE_01247	Cobalt-precorrin-2 C-methyltransferase	cbiL	Yes	+	modified_base
1240507	+	CDS	CAB3279342.1	OCPFDLNE_01247	Cobalt-precorrin-2 C-methyltransferase	cbiL	Yes	+	modified_base
1240899	+	CDS	CAB3279342.1	OCPFDLNE_01247	Cobalt-precorrin-2 C-methyltransferase	cbiL	No
1267480	+	CDS	CAB3279368.1	OCPFDLNE_01273	Cell division protein ZapA	zapA	No
1267519	+	CDS	CAB3279368.1	OCPFDLNE_01273	Cell division protein ZapA	zapA	No
1267684	+	CDS	CAB3279369.1	CPFDLNE_01274	CvpA family membrane protein	-	Yes	+	modified_base
1268098	+	CDS	CAB3279369.1	CPFDLNE_01274	CvpA family membrane protein	-	Yes	-	m4C
1268111	+	CDS	CAB3279369.1	CPFDLNE_01274	CvpA family membrane protein	-	No
1268158	+	CDS	CAB3279369.1	CPFDLNE_01274	CvpA family membrane protein	-	No
1268224	+	intergenic region	-	-	-	-	No
1268612	+	CDS	CAB3279370.1	OCPFDLNE_01275	DNA polymerase/3'-5' exonuclease PolX	polX	No
1272508	+	CDS	CAB3279372.1	OCPFDLNE_01277	Thioredoxin	trxA_1	Yes	+	modified_base
1272562	+	CDS	CAB3279372.1	OCPFDLNE_01277	Thioredoxin	trxA_1	Yes	-	modified_base
1272614	+	CDS	CAB3279372.1	OCPFDLNE_01277	Thioredoxin	trxA_1	No
1272732	+	CDS	CAB3279372.1	OCPFDLNE_01277	Thioredoxin	trxA_1	No
1272762	+	intergenic region	-	-	-	-	Yes	+	modified_base
1280237	+	CDS	CAB3279380.1	CPFDLNE_01286	hypothetical protein	-	No
1280514	+	CDS	CAB3279380.1	CPFDLNE_01286	hypothetical protein	-	No
1280563	+	CDS	CAB3279380.1	CPFDLNE_01286	hypothetical protein	-	No
1280685	+	CDS	CAB3279380.1	CPFDLNE_01286	hypothetical protein	-	Yes	+	modified_base
1284127	+	CDS	CAB3279385.1	OCPFDLNE_01291	ATP-dependent RNA helicase DbpA	dbpA	No
1284161	+	CDS	CAB3279385.1	OCPFDLNE_01291	ATP-dependent RNA helicase DbpA	dbpA	No
1284181	+	CDS	CAB3279385.1	OCPFDLNE_01291	ATP-dependent RNA helicase DbpA	dbpA	No
1284205	+	CDS	CAB3279385.1	OCPFDLNE_01291	ATP-dependent RNA helicase DbpA	dbpA	Yes	-	modified_base
1284214	+	CDS	CAB3279385.1	OCPFDLNE_01291	ATP-dependent RNA helicase DbpA	dbpA	No
1284254	+	CDS	CAB3279385.1	OCPFDLNE_01291	ATP-dependent RNA helicase DbpA	dbpA	No
1284315	+	CDS	CAB3279385.1	OCPFDLNE_01291	ATP-dependent RNA helicase DbpA	dbpA	Yes	-	modified_base
1284346	+	CDS	CAB3279385.1	OCPFDLNE_01291	ATP-dependent RNA helicase DbpA	dbpA	Yes	-	modified_base
1284417	+	CDS	CAB3279385.1	OCPFDLNE_01291	ATP-dependent RNA helicase DbpA	dbpA	No
1287453	-	CDS	CAB3279389.1	OCPFDLNE_01295	Multidrug resistance protein MdtG	mdtG	No
1287548	-	CDS	CAB3279389.1	OCPFDLNE_01295	Multidrug resistance protein MdtG	mdtG	No
1287591	-	CDS	CAB3279389.1	OCPFDLNE_01295	Multidrug resistance protein MdtG	mdtG	Yes	-	modified_base
1294776	-	CDS	CAB3279398.1	CPFDLNE_01304	hypothetical protein	-	No
1294861	-	CDS	CAB3279398.1	CPFDLNE_01304	hypothetical protein	-	No
1294932	-	CDS	CAB3279398.1	CPFDLNE_01304	hypothetical protein	-	No
1294976	-	CDS	CAB3279398.1	CPFDLNE_01304	hypothetical protein	-	No
1295000	-	CDS	CAB3279398.1	CPFDLNE_01304	hypothetical protein	-	Yes	+	modified_base
1295009	-	CDS	CAB3279398.1	CPFDLNE_01304	hypothetical protein	-	Yes	+	m4C
1295033	-	CDS	CAB3279398.1	CPFDLNE_01304	hypothetical protein	-	No
1295064	-	CDS	CAB3279398.1	CPFDLNE_01304	hypothetical protein	-	Yes	-	modified_base
1295101	-	CDS	CAB3279398.1	CPFDLNE_01304	hypothetical protein	-	Yes	-	m4C
1295137	-	CDS	CAB3279398.1	CPFDLNE_01304	hypothetical protein	-	Yes	-	modified_base
1295198	-	CDS	CAB3279398.1	CPFDLNE_01304	hypothetical protein	-	No
1303127	+	intergenic region	-	-	-	-	No
1303150	+	intergenic region	-	-	-	-	No
1303236	+	CDS	CAB3279408.1	OCPFDLNE_01314	Trigger factor	tig	No
1303271	+	CDS	CAB3279408.1	OCPFDLNE_01314	Trigger factor	tig	No
1303287	+	CDS	CAB3279408.1	OCPFDLNE_01314	Trigger factor	tig	Yes	-	modified_base
1303309	+	CDS	CAB3279408.1	OCPFDLNE_01314	Trigger factor	tig	Yes	+	modified_base
1303321	+	CDS	CAB3279408.1	OCPFDLNE_01314	Trigger factor	tig	Yes	-	m4C
1303391	+	CDS	CAB3279408.1	OCPFDLNE_01314	Trigger factor	tig	No
1303447	+	CDS	CAB3279408.1	OCPFDLNE_01314	Trigger factor	tig	No
1303508	+	CDS	CAB3279408.1	OCPFDLNE_01314	Trigger factor	tig	No
1303533	+	CDS	CAB3279408.1	OCPFDLNE_01314	Trigger factor	tig	No
1303544	+	CDS	CAB3279408.1	OCPFDLNE_01314	Trigger factor	tig	No
1303584	+	CDS	CAB3279408.1	OCPFDLNE_01314	Trigger factor	tig	Yes	+	modified_base
1303639	+	CDS	CAB3279408.1	OCPFDLNE_01314	Trigger factor	tig	No
1303706	+	CDS	CAB3279408.1	OCPFDLNE_01314	Trigger factor	tig	No
1303716	+	CDS	CAB3279408.1	OCPFDLNE_01314	Trigger factor	tig	Yes	+	modified_base
1303845	+	CDS	CAB3279408.1	OCPFDLNE_01314	Trigger factor	tig	Yes	+	modified_base
1303933	+	CDS	CAB3279408.1	OCPFDLNE_01314	Trigger factor	tig	Yes	-	modified_base
1303953	+	CDS	CAB3279408.1	OCPFDLNE_01314	Trigger factor	tig	Yes	+	modified_base
1303965	+	CDS	CAB3279408.1	OCPFDLNE_01314	Trigger factor	tig	Yes	+	modified_base
1304134	+	CDS	CAB3279408.1	OCPFDLNE_01314	Trigger factor	tig	Yes	-	modified_base
1304622	+	intergenic region	-	-	-	-	Yes	-	modified_base
1304717	+	CDS	CAB3279409.1	OCPFDLNE_01315	ATP-dependent Clp protease ATP-binding subunit ClpX	clpX	No
1304746	+	CDS	CAB3279409.1	OCPFDLNE_01315	ATP-dependent Clp protease ATP-binding subunit ClpX	clpX	No
1304799	+	CDS	CAB3279409.1	OCPFDLNE_01315	ATP-dependent Clp protease ATP-binding subunit ClpX	clpX	No
1304816	+	CDS	CAB3279409.1	OCPFDLNE_01315	ATP-dependent Clp protease ATP-binding subunit ClpX	clpX	Yes	-	modified_base
1304859	+	CDS	CAB3279409.1	OCPFDLNE_01315	ATP-dependent Clp protease ATP-binding subunit ClpX	clpX	No
1304933	+	CDS	CAB3279409.1	OCPFDLNE_01315	ATP-dependent Clp protease ATP-binding subunit ClpX	clpX	No
1304950	+	CDS	CAB3279409.1	OCPFDLNE_01315	ATP-dependent Clp protease ATP-binding subunit ClpX	clpX	Yes	+	modified_base
1304966	+	CDS	CAB3279409.1	OCPFDLNE_01315	ATP-dependent Clp protease ATP-binding subunit ClpX	clpX	No
1305311	+	CDS	CAB3279409.1	OCPFDLNE_01315	ATP-dependent Clp protease ATP-binding subunit ClpX	clpX	Yes	+	modified_base
1305440	+	CDS	CAB3279409.1	OCPFDLNE_01315	ATP-dependent Clp protease ATP-binding subunit ClpX	clpX	Yes	-	modified_base
1305574	+	CDS	CAB3279409.1	OCPFDLNE_01315	ATP-dependent Clp protease ATP-binding subunit ClpX	clpX	No
1310706	+	intergenic region	-	-	-	-	No
1310785	+	CDS	CAB3279416.1	OCPFDLNE_01322	Type I DNA topoisomerase	topA	Yes	+	modified_base
1310804	+	CDS	CAB3279416.1	OCPFDLNE_01322	Type I DNA topoisomerase	topA	No
1310842	+	CDS	CAB3279416.1	OCPFDLNE_01322	Type I DNA topoisomerase	topA	No
1310927	+	CDS	CAB3279416.1	OCPFDLNE_01322	Type I DNA topoisomerase	topA	No
1311048	+	CDS	CAB3279416.1	OCPFDLNE_01322	Type I DNA topoisomerase	topA	No
1311101	+	CDS	CAB3279416.1	OCPFDLNE_01322	Type I DNA topoisomerase	topA	No
1311139	+	CDS	CAB3279416.1	OCPFDLNE_01322	Type I DNA topoisomerase	topA	No
1311221	+	CDS	CAB3279416.1	OCPFDLNE_01322	Type I DNA topoisomerase	topA	No
1311416	+	CDS	CAB3279416.1	OCPFDLNE_01322	Type I DNA topoisomerase	topA	No
1320696	+	CDS	CAB3279426.1	OCPFDLNE_01332	CoA-binding domain-containing protein	yccU	No
1320766	+	CDS	CAB3279426.1	OCPFDLNE_01332	CoA-binding domain-containing protein	yccU	Yes	-	modified_base
1320855	+	CDS	CAB3279426.1	OCPFDLNE_01332	CoA-binding domain-containing protein	yccU	No
1320934	+	CDS	CAB3279426.1	OCPFDLNE_01332	CoA-binding domain-containing protein	yccU	No
1320973	+	CDS	CAB3279426.1	OCPFDLNE_01332	CoA-binding domain-containing protein	yccU	Yes	+	modified_base
1320981	+	CDS	CAB3279426.1	OCPFDLNE_01332	CoA-binding domain-containing protein	yccU	Yes	-	m4C
1321043	+	CDS	CAB3279426.1	OCPFDLNE_01332	CoA-binding domain-containing protein	yccU	No
1333330	+	intergenic region	-	-	-	-	No
1333345	+	intergenic region	-	-	-	-	Yes	+	modified_base
1333416	+	intergenic region	-	-	-	-	No
1333431	+	intergenic region	-	-	-	-	No
1333439	+	intergenic region	-	-	-	-	No
1333459	+	intergenic region	-	-	-	-	No
1333470	+	intergenic region	-	-	-	-	No
1333512	+	CDS	CAB3279434.1	OCPFDLNE_01340	Glycerol-3-phosphate dehydrogenase	glpD	No
1333547	+	CDS	CAB3279434.1	OCPFDLNE_01340	Glycerol-3-phosphate dehydrogenase	glpD	No
1333600	+	CDS	CAB3279434.1	OCPFDLNE_01340	Glycerol-3-phosphate dehydrogenase	glpD	No
1333618	+	CDS	CAB3279434.1	OCPFDLNE_01340	Glycerol-3-phosphate dehydrogenase	glpD	No
1333800	+	CDS	CAB3279434.1	OCPFDLNE_01340	Glycerol-3-phosphate dehydrogenase	glpD	No
1333814	+	CDS	CAB3279434.1	OCPFDLNE_01340	Glycerol-3-phosphate dehydrogenase	glpD	No
1333852	+	CDS	CAB3279434.1	OCPFDLNE_01340	Glycerol-3-phosphate dehydrogenase	glpD	Yes	+	modified_base
1333876	+	CDS	CAB3279434.1	OCPFDLNE_01340	Glycerol-3-phosphate dehydrogenase	glpD	Yes	+	modified_base
1333900	+	CDS	CAB3279434.1	OCPFDLNE_01340	Glycerol-3-phosphate dehydrogenase	glpD	Yes	-	modified_base
1333915	+	CDS	CAB3279434.1	OCPFDLNE_01340	Glycerol-3-phosphate dehydrogenase	glpD	No
1333947	+	CDS	CAB3279434.1	OCPFDLNE_01340	Glycerol-3-phosphate dehydrogenase	glpD	Yes	-	modified_base
1333955	+	CDS	CAB3279434.1	OCPFDLNE_01340	Glycerol-3-phosphate dehydrogenase	glpD	Yes	-	modified_base
1333984	+	CDS	CAB3279434.1	OCPFDLNE_01340	Glycerol-3-phosphate dehydrogenase	glpD	No
1333997	+	CDS	CAB3279434.1	OCPFDLNE_01340	Glycerol-3-phosphate dehydrogenase	glpD	No
1334033	+	CDS	CAB3279434.1	OCPFDLNE_01340	Glycerol-3-phosphate dehydrogenase	glpD	Yes	-	m4C
1334067	+	CDS	CAB3279434.1	OCPFDLNE_01340	Glycerol-3-phosphate dehydrogenase	glpD	No
1334089	+	CDS	CAB3279434.1	OCPFDLNE_01340	Glycerol-3-phosphate dehydrogenase	glpD	No
1334123	+	CDS	CAB3279434.1	OCPFDLNE_01340	Glycerol-3-phosphate dehydrogenase	glpD	No
1334178	+	CDS	CAB3279434.1	OCPFDLNE_01340	Glycerol-3-phosphate dehydrogenase	glpD	No
1334194	+	CDS	CAB3279434.1	OCPFDLNE_01340	Glycerol-3-phosphate dehydrogenase	glpD	No
1334210	+	CDS	CAB3279434.1	OCPFDLNE_01340	Glycerol-3-phosphate dehydrogenase	glpD	No
1334239	+	CDS	CAB3279434.1	OCPFDLNE_01340	Glycerol-3-phosphate dehydrogenase	glpD	No
1334265	+	CDS	CAB3279434.1	OCPFDLNE_01340	Glycerol-3-phosphate dehydrogenase	glpD	No
1334317	+	CDS	CAB3279434.1	OCPFDLNE_01340	Glycerol-3-phosphate dehydrogenase	glpD	No
1334327	+	CDS	CAB3279434.1	OCPFDLNE_01340	Glycerol-3-phosphate dehydrogenase	glpD	Yes	+	modified_base
1334354	+	CDS	CAB3279434.1	OCPFDLNE_01340	Glycerol-3-phosphate dehydrogenase	glpD	No
1334371	+	CDS	CAB3279434.1	OCPFDLNE_01340	Glycerol-3-phosphate dehydrogenase	glpD	No
1334386	+	CDS	CAB3279434.1	OCPFDLNE_01340	Glycerol-3-phosphate dehydrogenase	glpD	No
1334395	+	CDS	CAB3279434.1	OCPFDLNE_01340	Glycerol-3-phosphate dehydrogenase	glpD	No
1334467	+	CDS	CAB3279434.1	OCPFDLNE_01340	Glycerol-3-phosphate dehydrogenase	glpD	No
1334484	+	CDS	CAB3279434.1	OCPFDLNE_01340	Glycerol-3-phosphate dehydrogenase	glpD	Yes	+	modified_base
1334528	+	CDS	CAB3279434.1	OCPFDLNE_01340	Glycerol-3-phosphate dehydrogenase	glpD	No
1334557	+	CDS	CAB3279434.1	OCPFDLNE_01340	Glycerol-3-phosphate dehydrogenase	glpD	No
1334565	+	CDS	CAB3279434.1	OCPFDLNE_01340	Glycerol-3-phosphate dehydrogenase	glpD	Yes	+	modified_base
1334579	+	CDS	CAB3279434.1	OCPFDLNE_01340	Glycerol-3-phosphate dehydrogenase	glpD	No
1334620	+	CDS	CAB3279434.1	OCPFDLNE_01340	Glycerol-3-phosphate dehydrogenase	glpD	Yes	-	modified_base
1334650	+	CDS	CAB3279434.1	OCPFDLNE_01340	Glycerol-3-phosphate dehydrogenase	glpD	No
1334671	+	CDS	CAB3279434.1	OCPFDLNE_01340	Glycerol-3-phosphate dehydrogenase	glpD	Yes	+	m4C
1334757	+	CDS	CAB3279434.1	OCPFDLNE_01340	Glycerol-3-phosphate dehydrogenase	glpD	Yes	+	modified_base
1334779	+	CDS	CAB3279434.1	OCPFDLNE_01340	Glycerol-3-phosphate dehydrogenase	glpD	No
1334815	+	CDS	CAB3279434.1	OCPFDLNE_01340	Glycerol-3-phosphate dehydrogenase	glpD	No
1334926	+	CDS	CAB3279434.1	OCPFDLNE_01340	Glycerol-3-phosphate dehydrogenase	glpD	Yes	+	modified_base
1334986	+	CDS	CAB3279434.1	OCPFDLNE_01340	Glycerol-3-phosphate dehydrogenase	glpD	No
1335010	+	CDS	CAB3279434.1	OCPFDLNE_01340	Glycerol-3-phosphate dehydrogenase	glpD	Yes	-	modified_base
1335050	+	CDS	CAB3279434.1	OCPFDLNE_01340	Glycerol-3-phosphate dehydrogenase	glpD	Yes	+	modified_base
1335081	+	CDS	CAB3279434.1	OCPFDLNE_01340	Glycerol-3-phosphate dehydrogenase	glpD	Yes	-	modified_base
1343093	-	CDS	CAB3279442.1	CPFDLNE_01348	hypothetical protein	-	No
1343318	-	CDS	CAB3279443.1	OCPFDLNE_01349	Transcriptional repressor LexA	lexA	No
1346172	+	CDS	CAB3279446.1	OCPFDLNE_01352	Transketolase	tkt_2	No
1364296	+	intergenic region	-	-	-	-	No
1364348	+	CDS	CAB3279462.1	OCPFDLNE_01368	Ribosome maturation factor RimP	rimP	No
1364435	+	CDS	CAB3279462.1	OCPFDLNE_01368	Ribosome maturation factor RimP	rimP	No
1364470	+	CDS	CAB3279462.1	OCPFDLNE_01368	Ribosome maturation factor RimP	rimP	Yes	-	modified_base
1364509	+	CDS	CAB3279462.1	OCPFDLNE_01368	Ribosome maturation factor RimP	rimP	No
1364537	+	CDS	CAB3279462.1	OCPFDLNE_01368	Ribosome maturation factor RimP	rimP	No
1364567	+	CDS	CAB3279462.1	OCPFDLNE_01368	Ribosome maturation factor RimP	rimP	No
1364600	+	CDS	CAB3279462.1	OCPFDLNE_01368	Ribosome maturation factor RimP	rimP	No
1364671	+	CDS	CAB3279462.1	OCPFDLNE_01368	Ribosome maturation factor RimP	rimP	Yes	-	m4C
1364690	+	CDS	CAB3279462.1	OCPFDLNE_01368	Ribosome maturation factor RimP	rimP	No
1364709	+	CDS	CAB3279462.1	OCPFDLNE_01368	Ribosome maturation factor RimP	rimP	No
1364762	+	CDS	CAB3279462.1	OCPFDLNE_01368	Ribosome maturation factor RimP	rimP	Yes	-	modified_base
1364776	+	CDS	CAB3279462.1	OCPFDLNE_01368	Ribosome maturation factor RimP	rimP	No
1364848	+	CDS	CAB3279463.1	OCPFDLNE_01369	Transcription elongation factor NusA	nusA	Yes	-	modified_base
1364860	+	CDS	CAB3279463.1	OCPFDLNE_01369	Transcription elongation factor NusA	nusA	No
1364884	+	CDS	CAB3279463.1	OCPFDLNE_01369	Transcription elongation factor NusA	nusA	No
1364903	+	CDS	CAB3279463.1	OCPFDLNE_01369	Transcription elongation factor NusA	nusA	No
1364913	+	CDS	CAB3279463.1	OCPFDLNE_01369	Transcription elongation factor NusA	nusA	Yes	+	modified_base
1364962	+	CDS	CAB3279463.1	OCPFDLNE_01369	Transcription elongation factor NusA	nusA	Yes	-	modified_base
1365075	+	CDS	CAB3279463.1	OCPFDLNE_01369	Transcription elongation factor NusA	nusA	Yes	+	modified_base
1365128	+	CDS	CAB3279463.1	OCPFDLNE_01369	Transcription elongation factor NusA	nusA	No
1365150	+	CDS	CAB3279463.1	OCPFDLNE_01369	Transcription elongation factor NusA	nusA	Yes	-	modified_base
1365223	+	CDS	CAB3279463.1	OCPFDLNE_01369	Transcription elongation factor NusA	nusA	No
1365244	+	CDS	CAB3279463.1	OCPFDLNE_01369	Transcription elongation factor NusA	nusA	No
1365408	+	CDS	CAB3279463.1	OCPFDLNE_01369	Transcription elongation factor NusA	nusA	No
1365433	+	CDS	CAB3279463.1	OCPFDLNE_01369	Transcription elongation factor NusA	nusA	No
1365445	+	CDS	CAB3279463.1	OCPFDLNE_01369	Transcription elongation factor NusA	nusA	Yes	+	modified_base
1365456	+	CDS	CAB3279463.1	OCPFDLNE_01369	Transcription elongation factor NusA	nusA	Yes	-	modified_base
1365549	+	CDS	CAB3279463.1	OCPFDLNE_01369	Transcription elongation factor NusA	nusA	Yes	-	m4C
1365598	+	CDS	CAB3279463.1	OCPFDLNE_01369	Transcription elongation factor NusA	nusA	Yes	-	modified_base
1365672	+	CDS	CAB3279463.1	OCPFDLNE_01369	Transcription elongation factor NusA	nusA	Yes	-	modified_base
1365723	+	CDS	CAB3279463.1	OCPFDLNE_01369	Transcription elongation factor NusA	nusA	No
1365767	+	CDS	CAB3279463.1	OCPFDLNE_01369	Transcription elongation factor NusA	nusA	No
1365807	+	CDS	CAB3279463.1	OCPFDLNE_01369	Transcription elongation factor NusA	nusA	No
1365900	+	CDS	CAB3279463.1	OCPFDLNE_01369	Transcription elongation factor NusA	nusA	No
1365951	+	CDS	CAB3279463.1	OCPFDLNE_01369	Transcription elongation factor NusA	nusA	Yes	+	modified_base
1366097	+	CDS	CAB3279464.1	CPFDLNE_01370	Cytosolic protein YlxR	-	Yes	-	m4C
1366105	+	CDS	CAB3279464.1	CPFDLNE_01370	Cytosolic protein YlxR	-	No
1366255	+	CDS	CAB3279465.1	OCPFDLNE_01371	Probable ribosomal protein ylxQ	rplGA	No
1366347	+	CDS	CAB3279465.1	OCPFDLNE_01371	Probable ribosomal protein ylxQ	rplGA	No
1371673	+	intergenic region	-	-	-	-	No
1371691	+	intergenic region	-	-	-	-	No
1371702	+	intergenic region	-	-	-	-	Yes	+	modified_base
1371747	+	CDS	CAB3279471.1	OCPFDLNE_01377	30S ribosomal protein S15	rpsO	No
1371786	+	CDS	CAB3279471.1	OCPFDLNE_01377	30S ribosomal protein S15	rpsO	No
1371813	+	CDS	CAB3279471.1	OCPFDLNE_01377	30S ribosomal protein S15	rpsO	No
1371884	+	CDS	CAB3279471.1	OCPFDLNE_01377	30S ribosomal protein S15	rpsO	Yes	+	modified_base
1371930	+	CDS	CAB3279471.1	OCPFDLNE_01377	30S ribosomal protein S15	rpsO	No
1371981	+	intergenic region	-	-	-	-	No
1371997	+	intergenic region	-	-	-	-	No
1372039	+	intergenic region	-	-	-	-	No
1376006	-	CDS	CAB3279474.1	CPFDLNE_01380	hypothetical protein	-	Yes	-	m4C
1376019	-	CDS	CAB3279474.1	CPFDLNE_01380	hypothetical protein	-	Yes	+	modified_base
1380433	+	CDS	CAB3279481.1	CPFDLNE_01387	hypothetical protein	-	No
1380458	+	CDS	CAB3279481.1	CPFDLNE_01387	hypothetical protein	-	No
1380500	+	CDS	CAB3279481.1	CPFDLNE_01387	hypothetical protein	-	No
1380540	+	CDS	CAB3279481.1	CPFDLNE_01387	hypothetical protein	-	No
1380597	+	CDS	CAB3279481.1	CPFDLNE_01387	hypothetical protein	-	No
1380633	+	CDS	CAB3279481.1	CPFDLNE_01387	hypothetical protein	-	Yes	-	modified_base
1380710	+	CDS	CAB3279481.1	CPFDLNE_01387	hypothetical protein	-	No
1380726	+	CDS	CAB3279481.1	CPFDLNE_01387	hypothetical protein	-	No
1380798	+	CDS	CAB3279481.1	CPFDLNE_01387	hypothetical protein	-	Yes	+	modified_base
1380929	+	CDS	CAB3279481.1	CPFDLNE_01387	hypothetical protein	-	Yes	-	modified_base
1380959	+	CDS	CAB3279481.1	CPFDLNE_01387	hypothetical protein	-	No
1381013	+	CDS	CAB3279481.1	CPFDLNE_01387	hypothetical protein	-	Yes	-	modified_base
1381113	+	CDS	CAB3279481.1	CPFDLNE_01387	hypothetical protein	-	No
1381132	+	CDS	CAB3279481.1	CPFDLNE_01387	hypothetical protein	-	Yes	-	modified_base
1381155	+	CDS	CAB3279481.1	CPFDLNE_01387	hypothetical protein	-	Yes	+	modified_base
1385726	+	intergenic region	-	-	-	-	Yes	-	modified_base
1385755	+	intergenic region	-	-	-	-	Yes	-	m4C
1385781	+	intergenic region	-	-	-	-	Yes	-	modified_base
1385793	+	intergenic region	-	-	-	-	Yes	+	modified_base
1385833	+	intergenic region	-	-	-	-	No
1385912	+	CDS	CAB3279489.1	OCPFDLNE_01395	Glycine cleavage system aminomethyltransferase GcvT	gcvT	Yes	-	m4C
1386024	+	CDS	CAB3279489.1	OCPFDLNE_01395	Glycine cleavage system aminomethyltransferase GcvT	gcvT	No
1386053	+	CDS	CAB3279489.1	OCPFDLNE_01395	Glycine cleavage system aminomethyltransferase GcvT	gcvT	No
1386264	+	CDS	CAB3279489.1	OCPFDLNE_01395	Glycine cleavage system aminomethyltransferase GcvT	gcvT	No
1386287	+	CDS	CAB3279489.1	OCPFDLNE_01395	Glycine cleavage system aminomethyltransferase GcvT	gcvT	Yes	+	modified_base
1386333	+	CDS	CAB3279489.1	OCPFDLNE_01395	Glycine cleavage system aminomethyltransferase GcvT	gcvT	Yes	-	modified_base
1386375	+	CDS	CAB3279489.1	OCPFDLNE_01395	Glycine cleavage system aminomethyltransferase GcvT	gcvT	No
1386415	+	CDS	CAB3279489.1	OCPFDLNE_01395	Glycine cleavage system aminomethyltransferase GcvT	gcvT	No
1386458	+	CDS	CAB3279489.1	OCPFDLNE_01395	Glycine cleavage system aminomethyltransferase GcvT	gcvT	No
1386512	+	CDS	CAB3279489.1	OCPFDLNE_01395	Glycine cleavage system aminomethyltransferase GcvT	gcvT	No
1386556	+	CDS	CAB3279489.1	OCPFDLNE_01395	Glycine cleavage system aminomethyltransferase GcvT	gcvT	Yes	+	modified_base
1386582	+	CDS	CAB3279489.1	OCPFDLNE_01395	Glycine cleavage system aminomethyltransferase GcvT	gcvT	Yes	+	modified_base
1386666	+	CDS	CAB3279489.1	OCPFDLNE_01395	Glycine cleavage system aminomethyltransferase GcvT	gcvT	No
1386676	+	CDS	CAB3279489.1	OCPFDLNE_01395	Glycine cleavage system aminomethyltransferase GcvT	gcvT	Yes	-	modified_base
1386711	+	CDS	CAB3279489.1	OCPFDLNE_01395	Glycine cleavage system aminomethyltransferase GcvT	gcvT	No
1386777	+	CDS	CAB3279489.1	OCPFDLNE_01395	Glycine cleavage system aminomethyltransferase GcvT	gcvT	No
1386873	+	CDS	CAB3279489.1	OCPFDLNE_01395	Glycine cleavage system aminomethyltransferase GcvT	gcvT	No
1386900	+	CDS	CAB3279489.1	OCPFDLNE_01395	Glycine cleavage system aminomethyltransferase GcvT	gcvT	Yes	+	modified_base
1386910	+	CDS	CAB3279489.1	OCPFDLNE_01395	Glycine cleavage system aminomethyltransferase GcvT	gcvT	Yes	+	modified_base
1386931	+	CDS	CAB3279489.1	OCPFDLNE_01395	Glycine cleavage system aminomethyltransferase GcvT	gcvT	No
1386973	+	CDS	CAB3279489.1	OCPFDLNE_01395	Glycine cleavage system aminomethyltransferase GcvT	gcvT	No
1387031	+	CDS	CAB3279490.1	OCPFDLNE_01396	Aminomethyl-transferring glycine dehydrogenase subunit GcvPA	gcvPA	Yes	+	modified_base
1387049	+	CDS	CAB3279490.1	OCPFDLNE_01396	Aminomethyl-transferring glycine dehydrogenase subunit GcvPA	gcvPA	No
1387102	+	CDS	CAB3279490.1	OCPFDLNE_01396	Aminomethyl-transferring glycine dehydrogenase subunit GcvPA	gcvPA	No
1387405	+	CDS	CAB3279490.1	OCPFDLNE_01396	Aminomethyl-transferring glycine dehydrogenase subunit GcvPA	gcvPA	No
1387506	+	CDS	CAB3279490.1	OCPFDLNE_01396	Aminomethyl-transferring glycine dehydrogenase subunit GcvPA	gcvPA	Yes	-	m4C
1387544	+	CDS	CAB3279490.1	OCPFDLNE_01396	Aminomethyl-transferring glycine dehydrogenase subunit GcvPA	gcvPA	No
1387561	+	CDS	CAB3279490.1	OCPFDLNE_01396	Aminomethyl-transferring glycine dehydrogenase subunit GcvPA	gcvPA	Yes	+	modified_base
1387607	+	CDS	CAB3279490.1	OCPFDLNE_01396	Aminomethyl-transferring glycine dehydrogenase subunit GcvPA	gcvPA	No
1387751	+	CDS	CAB3279490.1	OCPFDLNE_01396	Aminomethyl-transferring glycine dehydrogenase subunit GcvPA	gcvPA	No
1387861	+	CDS	CAB3279490.1	OCPFDLNE_01396	Aminomethyl-transferring glycine dehydrogenase subunit GcvPA	gcvPA	Yes	-	modified_base
1387874	+	CDS	CAB3279490.1	OCPFDLNE_01396	Aminomethyl-transferring glycine dehydrogenase subunit GcvPA	gcvPA	No
1387898	+	CDS	CAB3279490.1	OCPFDLNE_01396	Aminomethyl-transferring glycine dehydrogenase subunit GcvPA	gcvPA	No
1387958	+	CDS	CAB3279490.1	OCPFDLNE_01396	Aminomethyl-transferring glycine dehydrogenase subunit GcvPA	gcvPA	Yes	-	m4C
1388072	+	CDS	CAB3279490.1	OCPFDLNE_01396	Aminomethyl-transferring glycine dehydrogenase subunit GcvPA	gcvPA	Yes	-	modified_base
1388107	+	CDS	CAB3279490.1	OCPFDLNE_01396	Aminomethyl-transferring glycine dehydrogenase subunit GcvPA	gcvPA	No
1388134	+	CDS	CAB3279490.1	OCPFDLNE_01396	Aminomethyl-transferring glycine dehydrogenase subunit GcvPA	gcvPA	No
1388183	+	CDS	CAB3279490.1	OCPFDLNE_01396	Aminomethyl-transferring glycine dehydrogenase subunit GcvPA	gcvPA	No
1388203	+	CDS	CAB3279490.1	OCPFDLNE_01396	Aminomethyl-transferring glycine dehydrogenase subunit GcvPA	gcvPA	No
1388222	+	CDS	CAB3279490.1	OCPFDLNE_01396	Aminomethyl-transferring glycine dehydrogenase subunit GcvPA	gcvPA	No
1388272	+	CDS	CAB3279490.1	OCPFDLNE_01396	Aminomethyl-transferring glycine dehydrogenase subunit GcvPA	gcvPA	Yes	+	m4C
1388324	+	CDS	CAB3279490.1	OCPFDLNE_01396	Aminomethyl-transferring glycine dehydrogenase subunit GcvPA	gcvPA	No
1388343	+	CDS	CAB3279491.1	OCPFDLNE_01397	Glycine dehydrogenase	gcvPB	No
1388493	+	CDS	CAB3279491.1	OCPFDLNE_01397	Glycine dehydrogenase	gcvPB	Yes	+	modified_base
1388501	+	CDS	CAB3279491.1	OCPFDLNE_01397	Glycine dehydrogenase	gcvPB	No
1388570	+	CDS	CAB3279491.1	OCPFDLNE_01397	Glycine dehydrogenase	gcvPB	No
1388584	+	CDS	CAB3279491.1	OCPFDLNE_01397	Glycine dehydrogenase	gcvPB	No
1388625	+	CDS	CAB3279491.1	OCPFDLNE_01397	Glycine dehydrogenase	gcvPB	Yes	+	m4C
1388667	+	CDS	CAB3279491.1	OCPFDLNE_01397	Glycine dehydrogenase	gcvPB	No
1388693	+	CDS	CAB3279491.1	OCPFDLNE_01397	Glycine dehydrogenase	gcvPB	Yes	+	modified_base
1388703	+	CDS	CAB3279491.1	OCPFDLNE_01397	Glycine dehydrogenase	gcvPB	Yes	+	modified_base
1388735	+	CDS	CAB3279491.1	OCPFDLNE_01397	Glycine dehydrogenase	gcvPB	No
1388802	+	CDS	CAB3279491.1	OCPFDLNE_01397	Glycine dehydrogenase	gcvPB	No
1388845	+	CDS	CAB3279491.1	OCPFDLNE_01397	Glycine dehydrogenase	gcvPB	No
1388897	+	CDS	CAB3279491.1	OCPFDLNE_01397	Glycine dehydrogenase	gcvPB	Yes	+	modified_base
1388965	+	CDS	CAB3279491.1	OCPFDLNE_01397	Glycine dehydrogenase	gcvPB	Yes	-	modified_base
1393582	+	intergenic region	-	-	-	-	No
1393607	+	CDS	CAB3279497.1	OCPFDLNE_01403	Biotin carboxyl carrier protein of acetyl-CoA carboxylase	accB	No
1393639	+	CDS	CAB3279497.1	OCPFDLNE_01403	Biotin carboxyl carrier protein of acetyl-CoA carboxylase	accB	Yes	-	m4C
1393680	+	CDS	CAB3279497.1	OCPFDLNE_01403	Biotin carboxyl carrier protein of acetyl-CoA carboxylase	accB	No
1393767	+	CDS	CAB3279497.1	OCPFDLNE_01403	Biotin carboxyl carrier protein of acetyl-CoA carboxylase	accB	No
1393907	+	CDS	CAB3279497.1	OCPFDLNE_01403	Biotin carboxyl carrier protein of acetyl-CoA carboxylase	accB	Yes	-	modified_base
1393937	+	CDS	CAB3279497.1	OCPFDLNE_01403	Biotin carboxyl carrier protein of acetyl-CoA carboxylase	accB	Yes	+	modified_base
1394213	+	CDS	CAB3279498.1	OCPFDLNE_01404	Acetyl-CoA carboxylase biotin carboxylase subunit	accC	Yes	-	modified_base
1394226	+	CDS	CAB3279498.1	OCPFDLNE_01404	Acetyl-CoA carboxylase biotin carboxylase subunit	accC	No
1394301	+	CDS	CAB3279498.1	OCPFDLNE_01404	Acetyl-CoA carboxylase biotin carboxylase subunit	accC	No
1395477	+	CDS	CAB3279499.1	CPFDLNE_01405	Alkaline-shock protein YqhY	-	No
1399846	+	intergenic region	-	-	-	-	No
1399857	+	intergenic region	-	-	-	-	Yes	+	modified_base
1399902	+	CDS	CAB3279505.1	OCPFDLNE_01411	Cold shock protein CspC	cspLA	No
1399922	+	CDS	CAB3279505.1	OCPFDLNE_01411	Cold shock protein CspC	cspLA	No
1399995	+	CDS	CAB3279505.1	OCPFDLNE_01411	Cold shock protein CspC	cspLA	Yes	-	modified_base
1400013	+	CDS	CAB3279505.1	OCPFDLNE_01411	Cold shock protein CspC	cspLA	Yes	-	modified_base
1400025	+	CDS	CAB3279505.1	OCPFDLNE_01411	Cold shock protein CspC	cspLA	Yes	-	modified_base
1400044	+	CDS	CAB3279505.1	OCPFDLNE_01411	Cold shock protein CspC	cspLA	No
1400107	+	intergenic region	-	-	-	-	No
1413764	+	intergenic region	-	-	-	-	No
1413804	+	intergenic region	-	-	-	-	Yes	+	modified_base
1413930	+	CDS	CAB3279518.1	OCPFDLNE_01424	6-phosphogluconate dehydrogenase	gnd	No
1414008	+	CDS	CAB3279518.1	OCPFDLNE_01424	6-phosphogluconate dehydrogenase	gnd	No
1414070	+	CDS	CAB3279518.1	OCPFDLNE_01424	6-phosphogluconate dehydrogenase	gnd	Yes	-	modified_base
1414114	+	CDS	CAB3279518.1	OCPFDLNE_01424	6-phosphogluconate dehydrogenase	gnd	Yes	-	m4C
1418479	-	CDS	CAB3279522.1	CPFDLNE_01428	hypothetical protein	-	No
1419339	+	CDS	CAB3279524.1	CPFDLNE_01430	hypothetical protein	-	Yes	-	modified_base
1426630	+	CDS	CAB3279530.1	OCPFDLNE_01436	Putative sugar uptake ABC transporter	tmpC	No
1426676	+	CDS	CAB3279530.1	OCPFDLNE_01436	Putative sugar uptake ABC transporter	tmpC	No
1426704	+	CDS	CAB3279530.1	OCPFDLNE_01436	Putative sugar uptake ABC transporter	tmpC	Yes	+	modified_base
1426743	+	CDS	CAB3279530.1	OCPFDLNE_01436	Putative sugar uptake ABC transporter	tmpC	No
1426866	+	CDS	CAB3279530.1	OCPFDLNE_01436	Putative sugar uptake ABC transporter	tmpC	Yes	+	modified_base
1426875	+	CDS	CAB3279530.1	OCPFDLNE_01436	Putative sugar uptake ABC transporter	tmpC	No
1426919	+	CDS	CAB3279530.1	OCPFDLNE_01436	Putative sugar uptake ABC transporter	tmpC	No
1426932	+	CDS	CAB3279530.1	OCPFDLNE_01436	Putative sugar uptake ABC transporter	tmpC	No
1427027	+	CDS	CAB3279530.1	OCPFDLNE_01436	Putative sugar uptake ABC transporter	tmpC	Yes	+	modified_base
1427045	+	CDS	CAB3279530.1	OCPFDLNE_01436	Putative sugar uptake ABC transporter	tmpC	No
1427124	+	CDS	CAB3279530.1	OCPFDLNE_01436	Putative sugar uptake ABC transporter	tmpC	No
1427248	+	CDS	CAB3279530.1	OCPFDLNE_01436	Putative sugar uptake ABC transporter	tmpC	No
1431711	+	CDS	CAB3279534.1	OCPFDLNE_01440	Antilisterial bacteriocin subtilosin biosynthesis protein AlbE	albE	No
1431861	+	CDS	CAB3279534.1	OCPFDLNE_01440	Antilisterial bacteriocin subtilosin biosynthesis protein AlbE	albE	No
1434331	+	CDS	CAB3279536.1	OCPFDLNE_01442	Putative oxidoreductase ymfI	fabG_1	Yes	-	modified_base
1434493	+	CDS	CAB3279536.1	OCPFDLNE_01442	Putative oxidoreductase ymfI	fabG_1	No
1434521	+	CDS	CAB3279536.1	OCPFDLNE_01442	Putative oxidoreductase ymfI	fabG_1	No
1434567	+	CDS	CAB3279536.1	OCPFDLNE_01442	Putative oxidoreductase ymfI	fabG_1	No
1434594	+	CDS	CAB3279536.1	OCPFDLNE_01442	Putative oxidoreductase ymfI	fabG_1	No
1434673	+	CDS	CAB3279536.1	OCPFDLNE_01442	Putative oxidoreductase ymfI	fabG_1	No
1434705	+	CDS	CAB3279536.1	OCPFDLNE_01442	Putative oxidoreductase ymfI	fabG_1	No
1434747	+	CDS	CAB3279536.1	OCPFDLNE_01442	Putative oxidoreductase ymfI	fabG_1	Yes	+	modified_base
1438239	+	intergenic region	-	-	-	-	Yes	+	m6A
1438252	+	intergenic region	-	-	-	-	No
1438424	+	CDS	CAB3279540.1	OCPFDLNE_01446	Protein RecA	recA	No
1438447	+	CDS	CAB3279540.1	OCPFDLNE_01446	Protein RecA	recA	Yes	+	m4C
1438487	+	CDS	CAB3279540.1	OCPFDLNE_01446	Protein RecA	recA	No
1438673	+	CDS	CAB3279540.1	OCPFDLNE_01446	Protein RecA	recA	No
1438685	+	CDS	CAB3279540.1	OCPFDLNE_01446	Protein RecA	recA	No
1438767	+	CDS	CAB3279540.1	OCPFDLNE_01446	Protein RecA	recA	No
1438794	+	CDS	CAB3279540.1	OCPFDLNE_01446	Protein RecA	recA	No
1438896	+	CDS	CAB3279540.1	OCPFDLNE_01446	Protein RecA	recA	No
1438958	+	CDS	CAB3279540.1	OCPFDLNE_01446	Protein RecA	recA	No
1438990	+	CDS	CAB3279540.1	OCPFDLNE_01446	Protein RecA	recA	No
1439495	+	intergenic region	-	-	-	-	No
1439542	+	intergenic region	-	-	-	-	Yes	+	modified_base
1439562	+	intergenic region	-	-	-	-	No
1439581	+	intergenic region	-	-	-	-	No
1439639	+	CDS	CAB3279541.1	OCPFDLNE_01447	Ribonuclease Y	rny	No
1439781	+	CDS	CAB3279541.1	OCPFDLNE_01447	Ribonuclease Y	rny	No
1439829	+	CDS	CAB3279541.1	OCPFDLNE_01447	Ribonuclease Y	rny	No
1439877	+	CDS	CAB3279541.1	OCPFDLNE_01447	Ribonuclease Y	rny	Yes	+	modified_base
1439954	+	CDS	CAB3279541.1	OCPFDLNE_01447	Ribonuclease Y	rny	No
1439963	+	CDS	CAB3279541.1	OCPFDLNE_01447	Ribonuclease Y	rny	Yes	-	modified_base
1439996	+	CDS	CAB3279541.1	OCPFDLNE_01447	Ribonuclease Y	rny	No
1440025	+	CDS	CAB3279541.1	OCPFDLNE_01447	Ribonuclease Y	rny	No
1440504	+	CDS	CAB3279541.1	OCPFDLNE_01447	Ribonuclease Y	rny	No
1448472	+	intergenic region	-	-	-	-	Yes	-	modified_base
1448514	+	CDS	CAB3279548.1	OCPFDLNE_01454	Formate C-acetyltransferase	pflB_1	No
1448566	+	CDS	CAB3279548.1	OCPFDLNE_01454	Formate C-acetyltransferase	pflB_1	No
1448752	+	CDS	CAB3279548.1	OCPFDLNE_01454	Formate C-acetyltransferase	pflB_1	No
1448776	+	CDS	CAB3279548.1	OCPFDLNE_01454	Formate C-acetyltransferase	pflB_1	No
1448877	+	CDS	CAB3279548.1	OCPFDLNE_01454	Formate C-acetyltransferase	pflB_1	No
1448885	+	CDS	CAB3279548.1	OCPFDLNE_01454	Formate C-acetyltransferase	pflB_1	Yes	-	modified_base
1448945	+	CDS	CAB3279548.1	OCPFDLNE_01454	Formate C-acetyltransferase	pflB_1	Yes	+	modified_base
1449005	+	CDS	CAB3279548.1	OCPFDLNE_01454	Formate C-acetyltransferase	pflB_1	No
1449088	+	CDS	CAB3279548.1	OCPFDLNE_01454	Formate C-acetyltransferase	pflB_1	Yes	-	modified_base
1449105	+	CDS	CAB3279548.1	OCPFDLNE_01454	Formate C-acetyltransferase	pflB_1	Yes	+	modified_base
1449124	+	CDS	CAB3279548.1	OCPFDLNE_01454	Formate C-acetyltransferase	pflB_1	No
1449186	+	CDS	CAB3279548.1	OCPFDLNE_01454	Formate C-acetyltransferase	pflB_1	Yes	-	modified_base
1449265	+	CDS	CAB3279548.1	OCPFDLNE_01454	Formate C-acetyltransferase	pflB_1	Yes	-	m4C
1449314	+	CDS	CAB3279548.1	OCPFDLNE_01454	Formate C-acetyltransferase	pflB_1	Yes	-	modified_base
1449379	+	CDS	CAB3279548.1	OCPFDLNE_01454	Formate C-acetyltransferase	pflB_1	No
1449412	+	CDS	CAB3279548.1	OCPFDLNE_01454	Formate C-acetyltransferase	pflB_1	No
1449446	+	CDS	CAB3279548.1	OCPFDLNE_01454	Formate C-acetyltransferase	pflB_1	No
1449471	+	CDS	CAB3279548.1	OCPFDLNE_01454	Formate C-acetyltransferase	pflB_1	No
1449512	+	CDS	CAB3279548.1	OCPFDLNE_01454	Formate C-acetyltransferase	pflB_1	No
1449563	+	CDS	CAB3279548.1	OCPFDLNE_01454	Formate C-acetyltransferase	pflB_1	Yes	-	modified_base
1449625	+	CDS	CAB3279548.1	OCPFDLNE_01454	Formate C-acetyltransferase	pflB_1	No
1449690	+	CDS	CAB3279548.1	OCPFDLNE_01454	Formate C-acetyltransferase	pflB_1	No
1449919	+	CDS	CAB3279548.1	OCPFDLNE_01454	Formate C-acetyltransferase	pflB_1	No
1450128	+	CDS	CAB3279548.1	OCPFDLNE_01454	Formate C-acetyltransferase	pflB_1	No
1450152	+	CDS	CAB3279548.1	OCPFDLNE_01454	Formate C-acetyltransferase	pflB_1	No
1450189	+	CDS	CAB3279548.1	OCPFDLNE_01454	Formate C-acetyltransferase	pflB_1	No
1450203	+	CDS	CAB3279548.1	OCPFDLNE_01454	Formate C-acetyltransferase	pflB_1	No
1450234	+	CDS	CAB3279548.1	OCPFDLNE_01454	Formate C-acetyltransferase	pflB_1	No
1450267	+	CDS	CAB3279548.1	OCPFDLNE_01454	Formate C-acetyltransferase	pflB_1	No
1450513	+	CDS	CAB3279548.1	OCPFDLNE_01454	Formate C-acetyltransferase	pflB_1	No
1450589	+	CDS	CAB3279548.1	OCPFDLNE_01454	Formate C-acetyltransferase	pflB_1	No
1450615	+	CDS	CAB3279548.1	OCPFDLNE_01454	Formate C-acetyltransferase	pflB_1	No
1450712	+	CDS	CAB3279548.1	OCPFDLNE_01454	Formate C-acetyltransferase	pflB_1	Yes	+	modified_base
1450758	+	intergenic region	-	-	-	-	No
1450768	+	intergenic region	-	-	-	-	No
1450874	+	CDS	CAB3279549.1	OCPFDLNE_01455	Pyruvate formate-lyase-activating enzyme	pflA	No
1450913	+	CDS	CAB3279549.1	OCPFDLNE_01455	Pyruvate formate-lyase-activating enzyme	pflA	No
1450989	+	CDS	CAB3279549.1	OCPFDLNE_01455	Pyruvate formate-lyase-activating enzyme	pflA	No
1450997	+	CDS	CAB3279549.1	OCPFDLNE_01455	Pyruvate formate-lyase-activating enzyme	pflA	No
1451019	+	CDS	CAB3279549.1	OCPFDLNE_01455	Pyruvate formate-lyase-activating enzyme	pflA	Yes	+	modified_base
1451027	+	CDS	CAB3279549.1	OCPFDLNE_01455	Pyruvate formate-lyase-activating enzyme	pflA	No
1451079	+	CDS	CAB3279549.1	OCPFDLNE_01455	Pyruvate formate-lyase-activating enzyme	pflA	No
1451117	+	CDS	CAB3279549.1	OCPFDLNE_01455	Pyruvate formate-lyase-activating enzyme	pflA	Yes	-	modified_base
1451198	+	CDS	CAB3279549.1	OCPFDLNE_01455	Pyruvate formate-lyase-activating enzyme	pflA	Yes	+	modified_base
1457302	-	CDS	CAB3279556.1	OCPFDLNE_01462	Acetyl-CoA C-acetyltransferase thil	thlA	Yes	-	modified_base
1457359	-	CDS	CAB3279556.1	OCPFDLNE_01462	Acetyl-CoA C-acetyltransferase thil	thlA	Yes	-	m6A
1457368	-	CDS	CAB3279556.1	OCPFDLNE_01462	Acetyl-CoA C-acetyltransferase thil	thlA	No
1457404	-	CDS	CAB3279556.1	OCPFDLNE_01462	Acetyl-CoA C-acetyltransferase thil	thlA	No
1457471	-	CDS	CAB3279556.1	OCPFDLNE_01462	Acetyl-CoA C-acetyltransferase thil	thlA	Yes	-	modified_base
1457524	-	CDS	CAB3279556.1	OCPFDLNE_01462	Acetyl-CoA C-acetyltransferase thil	thlA	No
1457589	-	CDS	CAB3279556.1	OCPFDLNE_01462	Acetyl-CoA C-acetyltransferase thil	thlA	Yes	-	m4C
1457627	-	CDS	CAB3279556.1	OCPFDLNE_01462	Acetyl-CoA C-acetyltransferase thil	thlA	Yes	+	modified_base
1457668	-	CDS	CAB3279556.1	OCPFDLNE_01462	Acetyl-CoA C-acetyltransferase thil	thlA	No
1457689	-	CDS	CAB3279556.1	OCPFDLNE_01462	Acetyl-CoA C-acetyltransferase thil	thlA	No
1457703	-	CDS	CAB3279556.1	OCPFDLNE_01462	Acetyl-CoA C-acetyltransferase thil	thlA	Yes	-	m4C
1457787	-	CDS	CAB3279556.1	OCPFDLNE_01462	Acetyl-CoA C-acetyltransferase thil	thlA	Yes	+	modified_base
1457894	-	CDS	CAB3279556.1	OCPFDLNE_01462	Acetyl-CoA C-acetyltransferase thil	thlA	Yes	+	modified_base
1467521	-	CDS	CAB3279565.1	CPFDLNE_01471	hypothetical protein	-	No
1467572	-	CDS	CAB3279565.1	CPFDLNE_01471	hypothetical protein	-	Yes	+	modified_base
1467593	-	CDS	CAB3279565.1	CPFDLNE_01471	hypothetical protein	-	No
1467602	-	CDS	CAB3279565.1	CPFDLNE_01471	hypothetical protein	-	No
1467657	-	CDS	CAB3279565.1	CPFDLNE_01471	hypothetical protein	-	No
1467820	-	CDS	CAB3279565.1	CPFDLNE_01471	hypothetical protein	-	Yes	+	m4C
1467857	-	CDS	CAB3279565.1	CPFDLNE_01471	hypothetical protein	-	Yes	-	modified_base
1467974	-	CDS	CAB3279565.1	CPFDLNE_01471	hypothetical protein	-	Yes	-	modified_base
1468028	-	CDS	CAB3279565.1	CPFDLNE_01471	hypothetical protein	-	No
1468050	-	CDS	CAB3279565.1	CPFDLNE_01471	hypothetical protein	-	Yes	-	modified_base
1486005	-	CDS	CAB3279581.1	OCPFDLNE_01487	Superoxide dismutase	sodA	Yes	-	m4C
1486184	-	CDS	CAB3279581.1	OCPFDLNE_01487	Superoxide dismutase	sodA	Yes	+	m4C
1486286	-	CDS	CAB3279581.1	OCPFDLNE_01487	Superoxide dismutase	sodA	Yes	+	modified_base
1492938	-	CDS	CAB3279589.1	OCPFDLNE_01495	Putative metal (Zinc) transport protein(ABC transporter%2C ATP-binding protein)	znuC_2	Yes	-	modified_base
1496193	-	CDS	CAB3279592.1	OCPFDLNE_01498	DEAD-box ATP-dependent RNA helicase CshB	cshB	No
1499344	-	intergenic region	-	-	-	-	Yes	-	modified_base
1499356	-	intergenic region	-	-	-	-	No
1499442	-	CDS	CAB3279596.1	OCPFDLNE_01502	RNA polymerase sigma factor SigA	sigA	No
1499473	-	CDS	CAB3279596.1	OCPFDLNE_01502	RNA polymerase sigma factor SigA	sigA	No
1499496	-	CDS	CAB3279596.1	OCPFDLNE_01502	RNA polymerase sigma factor SigA	sigA	No
1500326	-	CDS	CAB3279596.1	OCPFDLNE_01502	RNA polymerase sigma factor SigA	sigA	No
1500341	-	CDS	CAB3279596.1	OCPFDLNE_01502	RNA polymerase sigma factor SigA	sigA	No
1500364	-	CDS	CAB3279596.1	OCPFDLNE_01502	RNA polymerase sigma factor SigA	sigA	No
1500409	-	CDS	CAB3279596.1	OCPFDLNE_01502	RNA polymerase sigma factor SigA	sigA	No
1500428	-	CDS	CAB3279596.1	OCPFDLNE_01502	RNA polymerase sigma factor SigA	sigA	No
1500492	-	intergenic region	-	-	-	-	Yes	-	modified_base
1507915	-	CDS	CAB3279602.1	OCPFDLNE_01508	DNA recombination protein RecO	recO	Yes	-	modified_base
1507926	-	CDS	CAB3279602.1	OCPFDLNE_01508	DNA recombination protein RecO	recO	No
1510531	-	CDS	CAB3279607.1	OCPFDLNE_01513	Endoribonuclease YbeY	ybeY	No
1510599	-	CDS	CAB3279607.1	OCPFDLNE_01513	Endoribonuclease YbeY	ybeY	No
1510648	-	CDS	CAB3279607.1	OCPFDLNE_01513	Endoribonuclease YbeY	ybeY	No
1510909	-	CDS	CAB3279607.1	OCPFDLNE_01513	Endoribonuclease YbeY	ybeY	No
1510958	-	CDS	CAB3279607.1	OCPFDLNE_01513	Endoribonuclease YbeY	ybeY	No
1510970	-	intergenic region	-	-	-	-	Yes	-	modified_base
1510988	-	CDS	CAB3279608.1	OCPFDLNE_01514	Cyclic-di-AMP phosphodiesterase PgpH	pgpH	No
1511095	-	CDS	CAB3279608.1	OCPFDLNE_01514	Cyclic-di-AMP phosphodiesterase PgpH	pgpH	Yes	-	modified_base
1512794	-	CDS	CAB3279608.1	OCPFDLNE_01514	Cyclic-di-AMP phosphodiesterase PgpH	pgpH	No
1512815	-	CDS	CAB3279608.1	OCPFDLNE_01514	Cyclic-di-AMP phosphodiesterase PgpH	pgpH	No
1512902	-	CDS	CAB3279608.1	OCPFDLNE_01514	Cyclic-di-AMP phosphodiesterase PgpH	pgpH	No
1512945	-	CDS	CAB3279608.1	OCPFDLNE_01514	Cyclic-di-AMP phosphodiesterase PgpH	pgpH	Yes	+	modified_base
1513199	-	CDS	CAB3279609.1	CPFDLNE_01515	Phosphate starvation-inducible protein PhoH	-	No
1513246	-	CDS	CAB3279609.1	CPFDLNE_01515	Phosphate starvation-inducible protein PhoH	-	Yes	-	modified_base
1513398	-	CDS	CAB3279609.1	CPFDLNE_01515	Phosphate starvation-inducible protein PhoH	-	Yes	-	modified_base
1513430	-	CDS	CAB3279609.1	CPFDLNE_01515	Phosphate starvation-inducible protein PhoH	-	No
1513484	-	CDS	CAB3279609.1	CPFDLNE_01515	Phosphate starvation-inducible protein PhoH	-	No
1513554	-	CDS	CAB3279609.1	CPFDLNE_01515	Phosphate starvation-inducible protein PhoH	-	No
1513643	-	CDS	CAB3279609.1	CPFDLNE_01515	Phosphate starvation-inducible protein PhoH	-	No
1513692	-	CDS	CAB3279609.1	CPFDLNE_01515	Phosphate starvation-inducible protein PhoH	-	No
1513753	-	CDS	CAB3279609.1	CPFDLNE_01515	Phosphate starvation-inducible protein PhoH	-	No
1513786	-	CDS	CAB3279609.1	CPFDLNE_01515	Phosphate starvation-inducible protein PhoH	-	No
1514009	-	CDS	CAB3279609.1	CPFDLNE_01515	Phosphate starvation-inducible protein PhoH	-	Yes	-	modified_base
1514054	-	CDS	CAB3279609.1	CPFDLNE_01515	Phosphate starvation-inducible protein PhoH	-	No
1514069	-	CDS	CAB3279609.1	CPFDLNE_01515	Phosphate starvation-inducible protein PhoH	-	No
1514120	-	intergenic region	-	-	-	-	Yes	+	modified_base
1514342	-	CDS	CAB3279610.1	OCPFDLNE_01516	GatB/Yqey domain-containing protein	yqeY	No
1514354	-	CDS	CAB3279610.1	OCPFDLNE_01516	GatB/Yqey domain-containing protein	yqeY	No
1514378	-	CDS	CAB3279610.1	OCPFDLNE_01516	GatB/Yqey domain-containing protein	yqeY	No
1514443	-	CDS	CAB3279610.1	OCPFDLNE_01516	GatB/Yqey domain-containing protein	yqeY	Yes	+	modified_base
1514480	-	CDS	CAB3279610.1	OCPFDLNE_01516	GatB/Yqey domain-containing protein	yqeY	Yes	-	modified_base
1514508	-	CDS	CAB3279610.1	OCPFDLNE_01516	GatB/Yqey domain-containing protein	yqeY	No
1514525	-	CDS	CAB3279610.1	OCPFDLNE_01516	GatB/Yqey domain-containing protein	yqeY	No
1514541	-	CDS	CAB3279610.1	OCPFDLNE_01516	GatB/Yqey domain-containing protein	yqeY	No
1514591	-	CDS	CAB3279610.1	OCPFDLNE_01516	GatB/Yqey domain-containing protein	yqeY	No
1514691	-	CDS	CAB3279610.1	OCPFDLNE_01516	GatB/Yqey domain-containing protein	yqeY	No
1514726	-	CDS	CAB3279610.1	OCPFDLNE_01516	GatB/Yqey domain-containing protein	yqeY	Yes	+	modified_base
1514749	-	intergenic region	-	-	-	-	No
1514779	-	CDS	CAB3279611.1	OCPFDLNE_01517	30S ribosomal protein S21	rpsU	Yes	-	m4C
1514818	-	CDS	CAB3279611.1	OCPFDLNE_01517	30S ribosomal protein S21	rpsU	No
1514860	-	CDS	CAB3279611.1	OCPFDLNE_01517	30S ribosomal protein S21	rpsU	Yes	+	modified_base
1514893	-	CDS	CAB3279611.1	OCPFDLNE_01517	30S ribosomal protein S21	rpsU	No
1514932	-	CDS	CAB3279611.1	OCPFDLNE_01517	30S ribosomal protein S21	rpsU	Yes	-	modified_base
1514957	-	intergenic region	-	-	-	-	No
1540028	-	CDS	CAB3279637.1	CPFDLNE_01543	Secreted protein	-	Yes	+	modified_base
1540079	-	CDS	CAB3279637.1	CPFDLNE_01543	Secreted protein	-	Yes	-	modified_base
1540152	-	CDS	CAB3279637.1	CPFDLNE_01543	Secreted protein	-	No
1540291	-	intergenic region	-	-	-	-	Yes	+	modified_base
1544380	-	CDS	CAB3279643.1	CPFDLNE_01549	hypothetical protein	-	No
1544420	-	CDS	CAB3279643.1	CPFDLNE_01549	hypothetical protein	-	Yes	-	modified_base
1544520	-	CDS	CAB3279643.1	CPFDLNE_01549	hypothetical protein	-	No
1544630	-	CDS	CAB3279644.1	OCPFDLNE_01550	Putative pre-16S rRNA nuclease	yrrK	No
1544645	-	CDS	CAB3279644.1	OCPFDLNE_01550	Putative pre-16S rRNA nuclease	yrrK	Yes	+	modified_base
1544683	-	CDS	CAB3279644.1	OCPFDLNE_01550	Putative pre-16S rRNA nuclease	yrrK	Yes	-	modified_base
1544695	-	CDS	CAB3279644.1	OCPFDLNE_01550	Putative pre-16S rRNA nuclease	yrrK	Yes	-	modified_base
1544719	-	CDS	CAB3279644.1	OCPFDLNE_01550	Putative pre-16S rRNA nuclease	yrrK	No
1544727	-	CDS	CAB3279644.1	OCPFDLNE_01550	Putative pre-16S rRNA nuclease	yrrK	No
1544771	-	CDS	CAB3279644.1	OCPFDLNE_01550	Putative pre-16S rRNA nuclease	yrrK	Yes	-	modified_base
1544789	-	CDS	CAB3279644.1	OCPFDLNE_01550	Putative pre-16S rRNA nuclease	yrrK	Yes	+	modified_base
1544807	-	CDS	CAB3279644.1	OCPFDLNE_01550	Putative pre-16S rRNA nuclease	yrrK	Yes	+	modified_base
1544847	-	CDS	CAB3279644.1	OCPFDLNE_01550	Putative pre-16S rRNA nuclease	yrrK	Yes	+	modified_base
1544970	-	CDS	CAB3279644.1	OCPFDLNE_01550	Putative pre-16S rRNA nuclease	yrrK	No
1544994	-	CDS	CAB3279644.1	OCPFDLNE_01550	Putative pre-16S rRNA nuclease	yrrK	No
1545004	-	intergenic region	-	-	-	-	No
1545071	-	CDS	CAB3279645.1	CPFDLNE_01551	hypothetical protein	-	No
1545101	-	CDS	CAB3279645.1	CPFDLNE_01551	hypothetical protein	-	No
1545180	-	CDS	CAB3279645.1	CPFDLNE_01551	hypothetical protein	-	No
1545220	-	CDS	CAB3279645.1	CPFDLNE_01551	hypothetical protein	-	Yes	-	modified_base
1545240	-	CDS	CAB3279645.1	CPFDLNE_01551	hypothetical protein	-	No
1545267	-	CDS	CAB3279645.1	CPFDLNE_01551	hypothetical protein	-	Yes	+	modified_base
1545294	-	intergenic region	-	-	-	-	Yes	-	modified_base
1559254	-	intergenic region	-	-	-	-	No
1559287	-	intergenic region	-	-	-	-	Yes	-	modified_base
1559302	-	intergenic region	-	-	-	-	Yes	-	modified_base
1559342	-	intergenic region	-	-	-	-	Yes	-	modified_base
1559362	-	intergenic region	-	-	-	-	No
1559392	-	intergenic region	-	-	-	-	Yes	-	modified_base
1560266	-	CDS	CAB3279656.1	CPFDLNE_01562	Recombination factor protein RarA	-	No
1560305	-	CDS	CAB3279656.1	CPFDLNE_01562	Recombination factor protein RarA	-	No
1560439	-	CDS	CAB3279656.1	CPFDLNE_01562	Recombination factor protein RarA	-	No
1560450	-	CDS	CAB3279656.1	CPFDLNE_01562	Recombination factor protein RarA	-	No
1567628	+	CDS	CAB3279663.1	OCPFDLNE_01569	Sporulation-specific N-acetylmuramoyl-L-alanine amidase	lytC	Yes	-	modified_base
1567736	+	CDS	CAB3279663.1	OCPFDLNE_01569	Sporulation-specific N-acetylmuramoyl-L-alanine amidase	lytC	No
1574482	-	CDS	CAB3279668.1	OCPFDLNE_01574	YrvD	lapA	No
1574493	-	CDS	CAB3279668.1	OCPFDLNE_01574	YrvD	lapA	No
1574676	-	CDS	CAB3279668.1	OCPFDLNE_01574	YrvD	lapA	No
1574734	-	CDS	CAB3279668.1	OCPFDLNE_01574	YrvD	lapA	No
1586459	-	CDS	CAB3279680.1	OCPFDLNE_01586	Glycerol kinase	glpK_2	No
1586650	-	CDS	CAB3279680.1	OCPFDLNE_01586	Glycerol kinase	glpK_2	No
1586897	-	CDS	CAB3279680.1	OCPFDLNE_01586	Glycerol kinase	glpK_2	Yes	-	modified_base
1586956	-	CDS	CAB3279680.1	OCPFDLNE_01586	Glycerol kinase	glpK_2	Yes	+	modified_base
1586970	-	CDS	CAB3279680.1	OCPFDLNE_01586	Glycerol kinase	glpK_2	No
1587127	-	CDS	CAB3279680.1	OCPFDLNE_01586	Glycerol kinase	glpK_2	Yes	+	modified_base
1587217	-	CDS	CAB3279680.1	OCPFDLNE_01586	Glycerol kinase	glpK_2	No
1587278	-	CDS	CAB3279680.1	OCPFDLNE_01586	Glycerol kinase	glpK_2	Yes	-	modified_base
1587304	-	CDS	CAB3279680.1	OCPFDLNE_01586	Glycerol kinase	glpK_2	Yes	+	modified_base
1587362	-	CDS	CAB3279680.1	OCPFDLNE_01586	Glycerol kinase	glpK_2	No
1587456	-	CDS	CAB3279680.1	OCPFDLNE_01586	Glycerol kinase	glpK_2	Yes	-	modified_base
1587577	-	CDS	CAB3279680.1	OCPFDLNE_01586	Glycerol kinase	glpK_2	No
1587599	-	CDS	CAB3279680.1	OCPFDLNE_01586	Glycerol kinase	glpK_2	Yes	-	modified_base
1587657	-	CDS	CAB3279680.1	OCPFDLNE_01586	Glycerol kinase	glpK_2	No
1588081	-	CDS	CAB3279681.1	OCPFDLNE_01587	Glycerol uptake facilitator	glpF_2	No
1588104	-	CDS	CAB3279681.1	OCPFDLNE_01587	Glycerol uptake facilitator	glpF_2	No
1588194	-	CDS	CAB3279681.1	OCPFDLNE_01587	Glycerol uptake facilitator	glpF_2	Yes	-	modified_base
1588503	-	CDS	CAB3279681.1	OCPFDLNE_01587	Glycerol uptake facilitator	glpF_2	No
1588514	-	CDS	CAB3279681.1	OCPFDLNE_01587	Glycerol uptake facilitator	glpF_2	No
1588615	-	CDS	CAB3279681.1	OCPFDLNE_01587	Glycerol uptake facilitator	glpF_2	No
1588640	-	intergenic region	-	-	-	-	Yes	-	modified_base
1588672	-	intergenic region	-	-	-	-	Yes	-	modified_base
1588738	-	intergenic region	-	-	-	-	No
1588746	-	intergenic region	-	-	-	-	No
1588755	-	intergenic region	-	-	-	-	Yes	+	modified_base
1588831	-	intergenic region	-	-	-	-	No
1589187	-	CDS	CAB3279682.1	OCPFDLNE_01588	50S ribosomal protein L27	rpmA	Yes	-	modified_base
1589383	-	CDS	CAB3279683.1	CPFDLNE_01589	YsxB	-	No
1589579	-	CDS	CAB3279683.1	CPFDLNE_01589	YsxB	-	No
1589593	-	CDS	CAB3279683.1	CPFDLNE_01589	YsxB	-	No
1589613	-	intergenic region	-	-	-	-	No
1589746	-	CDS	CAB3279684.1	OCPFDLNE_01590	50S ribosomal protein L21	rplU	No
1589840	-	CDS	CAB3279684.1	OCPFDLNE_01590	50S ribosomal protein L21	rplU	Yes	+	modified_base
1589850	-	CDS	CAB3279684.1	OCPFDLNE_01590	50S ribosomal protein L21	rplU	No
1589889	-	CDS	CAB3279684.1	OCPFDLNE_01590	50S ribosomal protein L21	rplU	Yes	+	modified_base
1589941	-	intergenic region	-	-	-	-	Yes	-	modified_base
1594580	-	intergenic region	-	-	-	-	Yes	-	modified_base
1594735	-	CDS	CAB3279690.1	OCPFDLNE_01596	Cell shape-determining protein MreB	mreB	No
1594765	-	CDS	CAB3279690.1	OCPFDLNE_01596	Cell shape-determining protein MreB	mreB	Yes	-	modified_base
1594802	-	CDS	CAB3279690.1	OCPFDLNE_01596	Cell shape-determining protein MreB	mreB	No
1594828	-	CDS	CAB3279690.1	OCPFDLNE_01596	Cell shape-determining protein MreB	mreB	No
1595111	-	CDS	CAB3279690.1	OCPFDLNE_01596	Cell shape-determining protein MreB	mreB	Yes	-	modified_base
1595380	-	CDS	CAB3279690.1	OCPFDLNE_01596	Cell shape-determining protein MreB	mreB	Yes	+	modified_base
1611490	-	CDS	CAB3279703.1	OCPFDLNE_01609	Replicative DNA helicase loader DnaB	dnaB	No
1613023	-	CDS	CAB3279704.1	OCPFDLNE_01610	Transcriptional repressor NrdR	nrdR	No
1616736	-	CDS	CAB3279707.1	OCPFDLNE_01613	DNA polymerase I	polA_1	No
1616753	-	CDS	CAB3279707.1	OCPFDLNE_01613	DNA polymerase I	polA_1	Yes	+	modified_base
1616876	-	CDS	CAB3279707.1	OCPFDLNE_01613	DNA polymerase I	polA_1	No
1616975	-	CDS	CAB3279707.1	OCPFDLNE_01613	DNA polymerase I	polA_1	No
1617032	-	CDS	CAB3279707.1	OCPFDLNE_01613	DNA polymerase I	polA_1	No
1622600	-	CDS	CAB3279712.1	OCPFDLNE_01618	Pyruvate kinase	pyk	No
1622680	-	CDS	CAB3279712.1	OCPFDLNE_01618	Pyruvate kinase	pyk	Yes	-	modified_base
1622729	-	CDS	CAB3279712.1	OCPFDLNE_01618	Pyruvate kinase	pyk	No
1622799	-	CDS	CAB3279712.1	OCPFDLNE_01618	Pyruvate kinase	pyk	No
1635450	+	intergenic region	-	-	-	-	Yes	+	modified_base
1635477	+	CDS	CAB3279722.1	CPFDLNE_01628	Universal stress protein UspA	-	Yes	+	modified_base
1635636	+	CDS	CAB3279722.1	CPFDLNE_01628	Universal stress protein UspA	-	No
1635684	+	CDS	CAB3279722.1	CPFDLNE_01628	Universal stress protein UspA	-	No
1635699	+	CDS	CAB3279722.1	CPFDLNE_01628	Universal stress protein UspA	-	Yes	-	modified_base
1635707	+	CDS	CAB3279722.1	CPFDLNE_01628	Universal stress protein UspA	-	Yes	-	modified_base
1635765	+	CDS	CAB3279722.1	CPFDLNE_01628	Universal stress protein UspA	-	Yes	+	modified_base
1635781	+	CDS	CAB3279722.1	CPFDLNE_01628	Universal stress protein UspA	-	No
1635801	+	CDS	CAB3279722.1	CPFDLNE_01628	Universal stress protein UspA	-	Yes	-	modified_base
1635840	+	CDS	CAB3279722.1	CPFDLNE_01628	Universal stress protein UspA	-	Yes	+	modified_base
1635876	+	CDS	CAB3279722.1	CPFDLNE_01628	Universal stress protein UspA	-	Yes	-	modified_base
1635899	+	CDS	CAB3279722.1	CPFDLNE_01628	Universal stress protein UspA	-	Yes	+	modified_base
1635932	+	intergenic region	-	-	-	-	No
1637580	-	CDS	CAB3279724.1	CPFDLNE_01630	hypothetical protein	-	No
1637631	-	CDS	CAB3279724.1	CPFDLNE_01630	hypothetical protein	-	No
1637653	-	CDS	CAB3279724.1	CPFDLNE_01630	hypothetical protein	-	No
1637681	-	CDS	CAB3279724.1	CPFDLNE_01630	hypothetical protein	-	Yes	-	m4C
1637725	-	CDS	CAB3279724.1	CPFDLNE_01630	hypothetical protein	-	No
1637760	-	CDS	CAB3279724.1	CPFDLNE_01630	hypothetical protein	-	No
1637895	-	CDS	CAB3279724.1	CPFDLNE_01630	hypothetical protein	-	Yes	+	modified_base
1638006	-	CDS	CAB3279724.1	CPFDLNE_01630	hypothetical protein	-	Yes	-	modified_base
1638063	-	CDS	CAB3279724.1	CPFDLNE_01630	hypothetical protein	-	Yes	+	modified_base
1638149	-	CDS	CAB3279724.1	CPFDLNE_01630	hypothetical protein	-	No
1638206	-	intergenic region	-	-	-	-	No
1650426	-	CDS	CAB3279736.1	OCPFDLNE_01642	Septation ring formation regulator EzrA	ezrA	No
1651866	+	intergenic region	-	-	-	-	No
1654344	-	CDS	CAB3279740.1	OCPFDLNE_01646	Catabolite control protein A	ccpA_2	Yes	-	modified_base
1654363	-	CDS	CAB3279740.1	OCPFDLNE_01646	Catabolite control protein A	ccpA_2	Yes	-	modified_base
1654477	-	CDS	CAB3279740.1	OCPFDLNE_01646	Catabolite control protein A	ccpA_2	Yes	-	modified_base
1654499	-	CDS	CAB3279740.1	OCPFDLNE_01646	Catabolite control protein A	ccpA_2	No
1654530	-	CDS	CAB3279740.1	OCPFDLNE_01646	Catabolite control protein A	ccpA_2	No
1654548	-	CDS	CAB3279740.1	OCPFDLNE_01646	Catabolite control protein A	ccpA_2	Yes	-	modified_base
1654589	-	CDS	CAB3279740.1	OCPFDLNE_01646	Catabolite control protein A	ccpA_2	No
1654603	-	CDS	CAB3279740.1	OCPFDLNE_01646	Catabolite control protein A	ccpA_2	No
1654671	-	CDS	CAB3279740.1	OCPFDLNE_01646	Catabolite control protein A	ccpA_2	No
1654866	-	CDS	CAB3279740.1	OCPFDLNE_01646	Catabolite control protein A	ccpA_2	No
1654981	-	CDS	CAB3279740.1	OCPFDLNE_01646	Catabolite control protein A	ccpA_2	No
1655133	-	CDS	CAB3279740.1	OCPFDLNE_01646	Catabolite control protein A	ccpA_2	No
1655172	-	CDS	CAB3279740.1	OCPFDLNE_01646	Catabolite control protein A	ccpA_2	No
1655235	-	CDS	CAB3279740.1	OCPFDLNE_01646	Catabolite control protein A	ccpA_2	No
1655268	-	CDS	CAB3279740.1	OCPFDLNE_01646	Catabolite control protein A	ccpA_2	No
1655326	-	intergenic region	-	-	-	-	Yes	-	modified_base
1656823	-	intergenic region	-	-	-	-	Yes	-	m6A
1656837	-	CDS	CAB3279742.1	CPFDLNE_01648	General stress protein	-	No
1656884	-	CDS	CAB3279742.1	CPFDLNE_01648	General stress protein	-	No
1656892	-	CDS	CAB3279742.1	CPFDLNE_01648	General stress protein	-	Yes	-	m4C
1656931	-	CDS	CAB3279742.1	CPFDLNE_01648	General stress protein	-	No
1656961	-	CDS	CAB3279742.1	CPFDLNE_01648	General stress protein	-	No
1656973	-	CDS	CAB3279742.1	CPFDLNE_01648	General stress protein	-	No
1656995	-	CDS	CAB3279742.1	CPFDLNE_01648	General stress protein	-	Yes	-	modified_base
1657043	-	CDS	CAB3279742.1	CPFDLNE_01648	General stress protein	-	No
1657061	-	CDS	CAB3279742.1	CPFDLNE_01648	General stress protein	-	Yes	+	modified_base
1657075	-	CDS	CAB3279742.1	CPFDLNE_01648	General stress protein	-	Yes	-	modified_base
1657091	-	CDS	CAB3279742.1	CPFDLNE_01648	General stress protein	-	Yes	-	modified_base
1657121	-	CDS	CAB3279742.1	CPFDLNE_01648	General stress protein	-	No
1657168	-	CDS	CAB3279742.1	CPFDLNE_01648	General stress protein	-	No
1657178	-	CDS	CAB3279742.1	CPFDLNE_01648	General stress protein	-	No
1657200	-	CDS	CAB3279742.1	CPFDLNE_01648	General stress protein	-	No
1657249	-	CDS	CAB3279742.1	CPFDLNE_01648	General stress protein	-	Yes	-	modified_base
1657344	-	CDS	CAB3279742.1	CPFDLNE_01648	General stress protein	-	No
1657405	-	CDS	CAB3279743.1	CPFDLNE_01649	YtxG	-	Yes	-	modified_base
1657435	-	CDS	CAB3279743.1	CPFDLNE_01649	YtxG	-	Yes	-	modified_base
1657489	-	CDS	CAB3279743.1	CPFDLNE_01649	YtxG	-	No
1657588	-	CDS	CAB3279743.1	CPFDLNE_01649	YtxG	-	No
1657625	-	CDS	CAB3279743.1	CPFDLNE_01649	YtxG	-	No
[truncated: 2,401 more rows]

## Sheet: R173_modifications_circ_phage
Position	RNA_mod_strand	feature	Protein ID	Locus Tag	Product	gene name	DNA_mod_seen	DNA_mod_strand
6555	-	CDS	CAB3281142.1	CPFDLNE_03111	Phage tail tape measure protein	-	No
15465	-	CDS	CAB3281155.1	CPFDLNE_03124	hypothetical protein	-	No
15795	-	CDS	CAB3281155.1	CPFDLNE_03124	hypothetical protein	-	No
28409	-	CDS	CAB3281182.1	CPFDLNE_03151	hypothetical protein	-	No
28437	-	CDS	CAB3281182.1	CPFDLNE_03151	hypothetical protein	-	No
28600	-	CDS	CAB3281183.1	CPFDLNE_03152	hypothetical protein	-	Yes	+
34547	-	intergenic region	-	-	-	-	No
34638	-	CDS	CAB3281195.1	CPFDLNE_03164	hypothetical protein	-	No
34658	-	CDS	CAB3281195.1	CPFDLNE_03164	hypothetical protein	-	No
34757	-	CDS	CAB3281195.1	CPFDLNE_03164	hypothetical protein	-	No
34777	-	CDS	CAB3281196.1	CPFDLNE_03165	hypothetical protein	-	No
34791	-	CDS	CAB3281196.1	CPFDLNE_03165	hypothetical protein	-	No
34805	-	CDS	CAB3281196.1	CPFDLNE_03165	hypothetical protein	-	No
34931	-	CDS	CAB3281196.1	CPFDLNE_03165	hypothetical protein	-	No
34960	-	CDS	CAB3281196.1	CPFDLNE_03165	hypothetical protein	-	No
34991	-	CDS	CAB3281196.1	CPFDLNE_03165	hypothetical protein	-	No
