# Supplementary figures and images for: RNA editing, RNA modifications, and transcriptional units in Listeria monocytogenes
Source: Research Square preprint supplement (doi:10.21203/rs.3.rs-1530110/v1), 2022-04-21

**Figure S2.** Log2 fold change heatmap of the expression rates of sRNAs and overlapping genes.

**400 MPa**

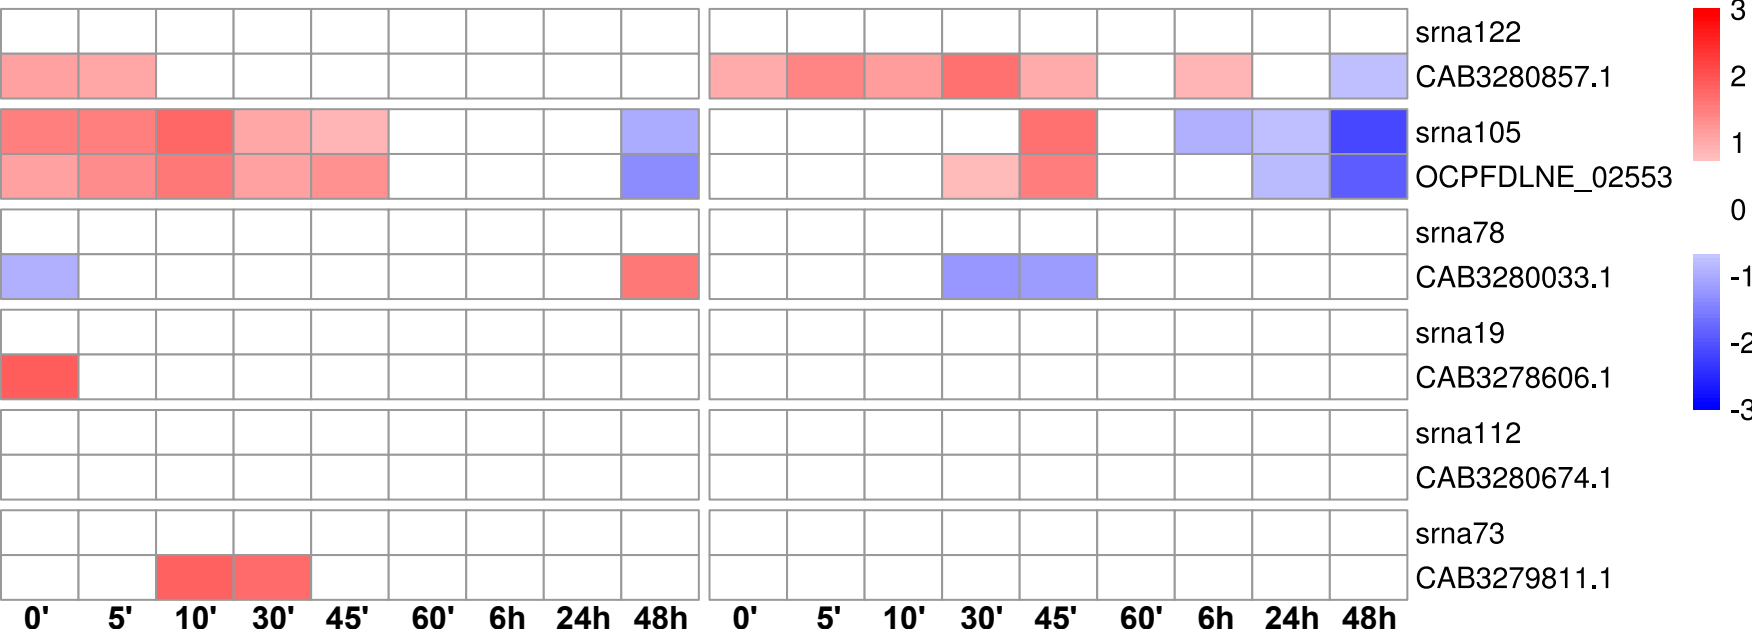

Supplement: Supplementary file 4 [file a3669d3a39a1147711b965ce.pdf]
